# Supplementary material
Source: PubMed Central journal article supplement (PMC4256489)

# gi|148661431 MRA\_1646 hypothetical protein

VTGTAPIYEILHDAK#ER

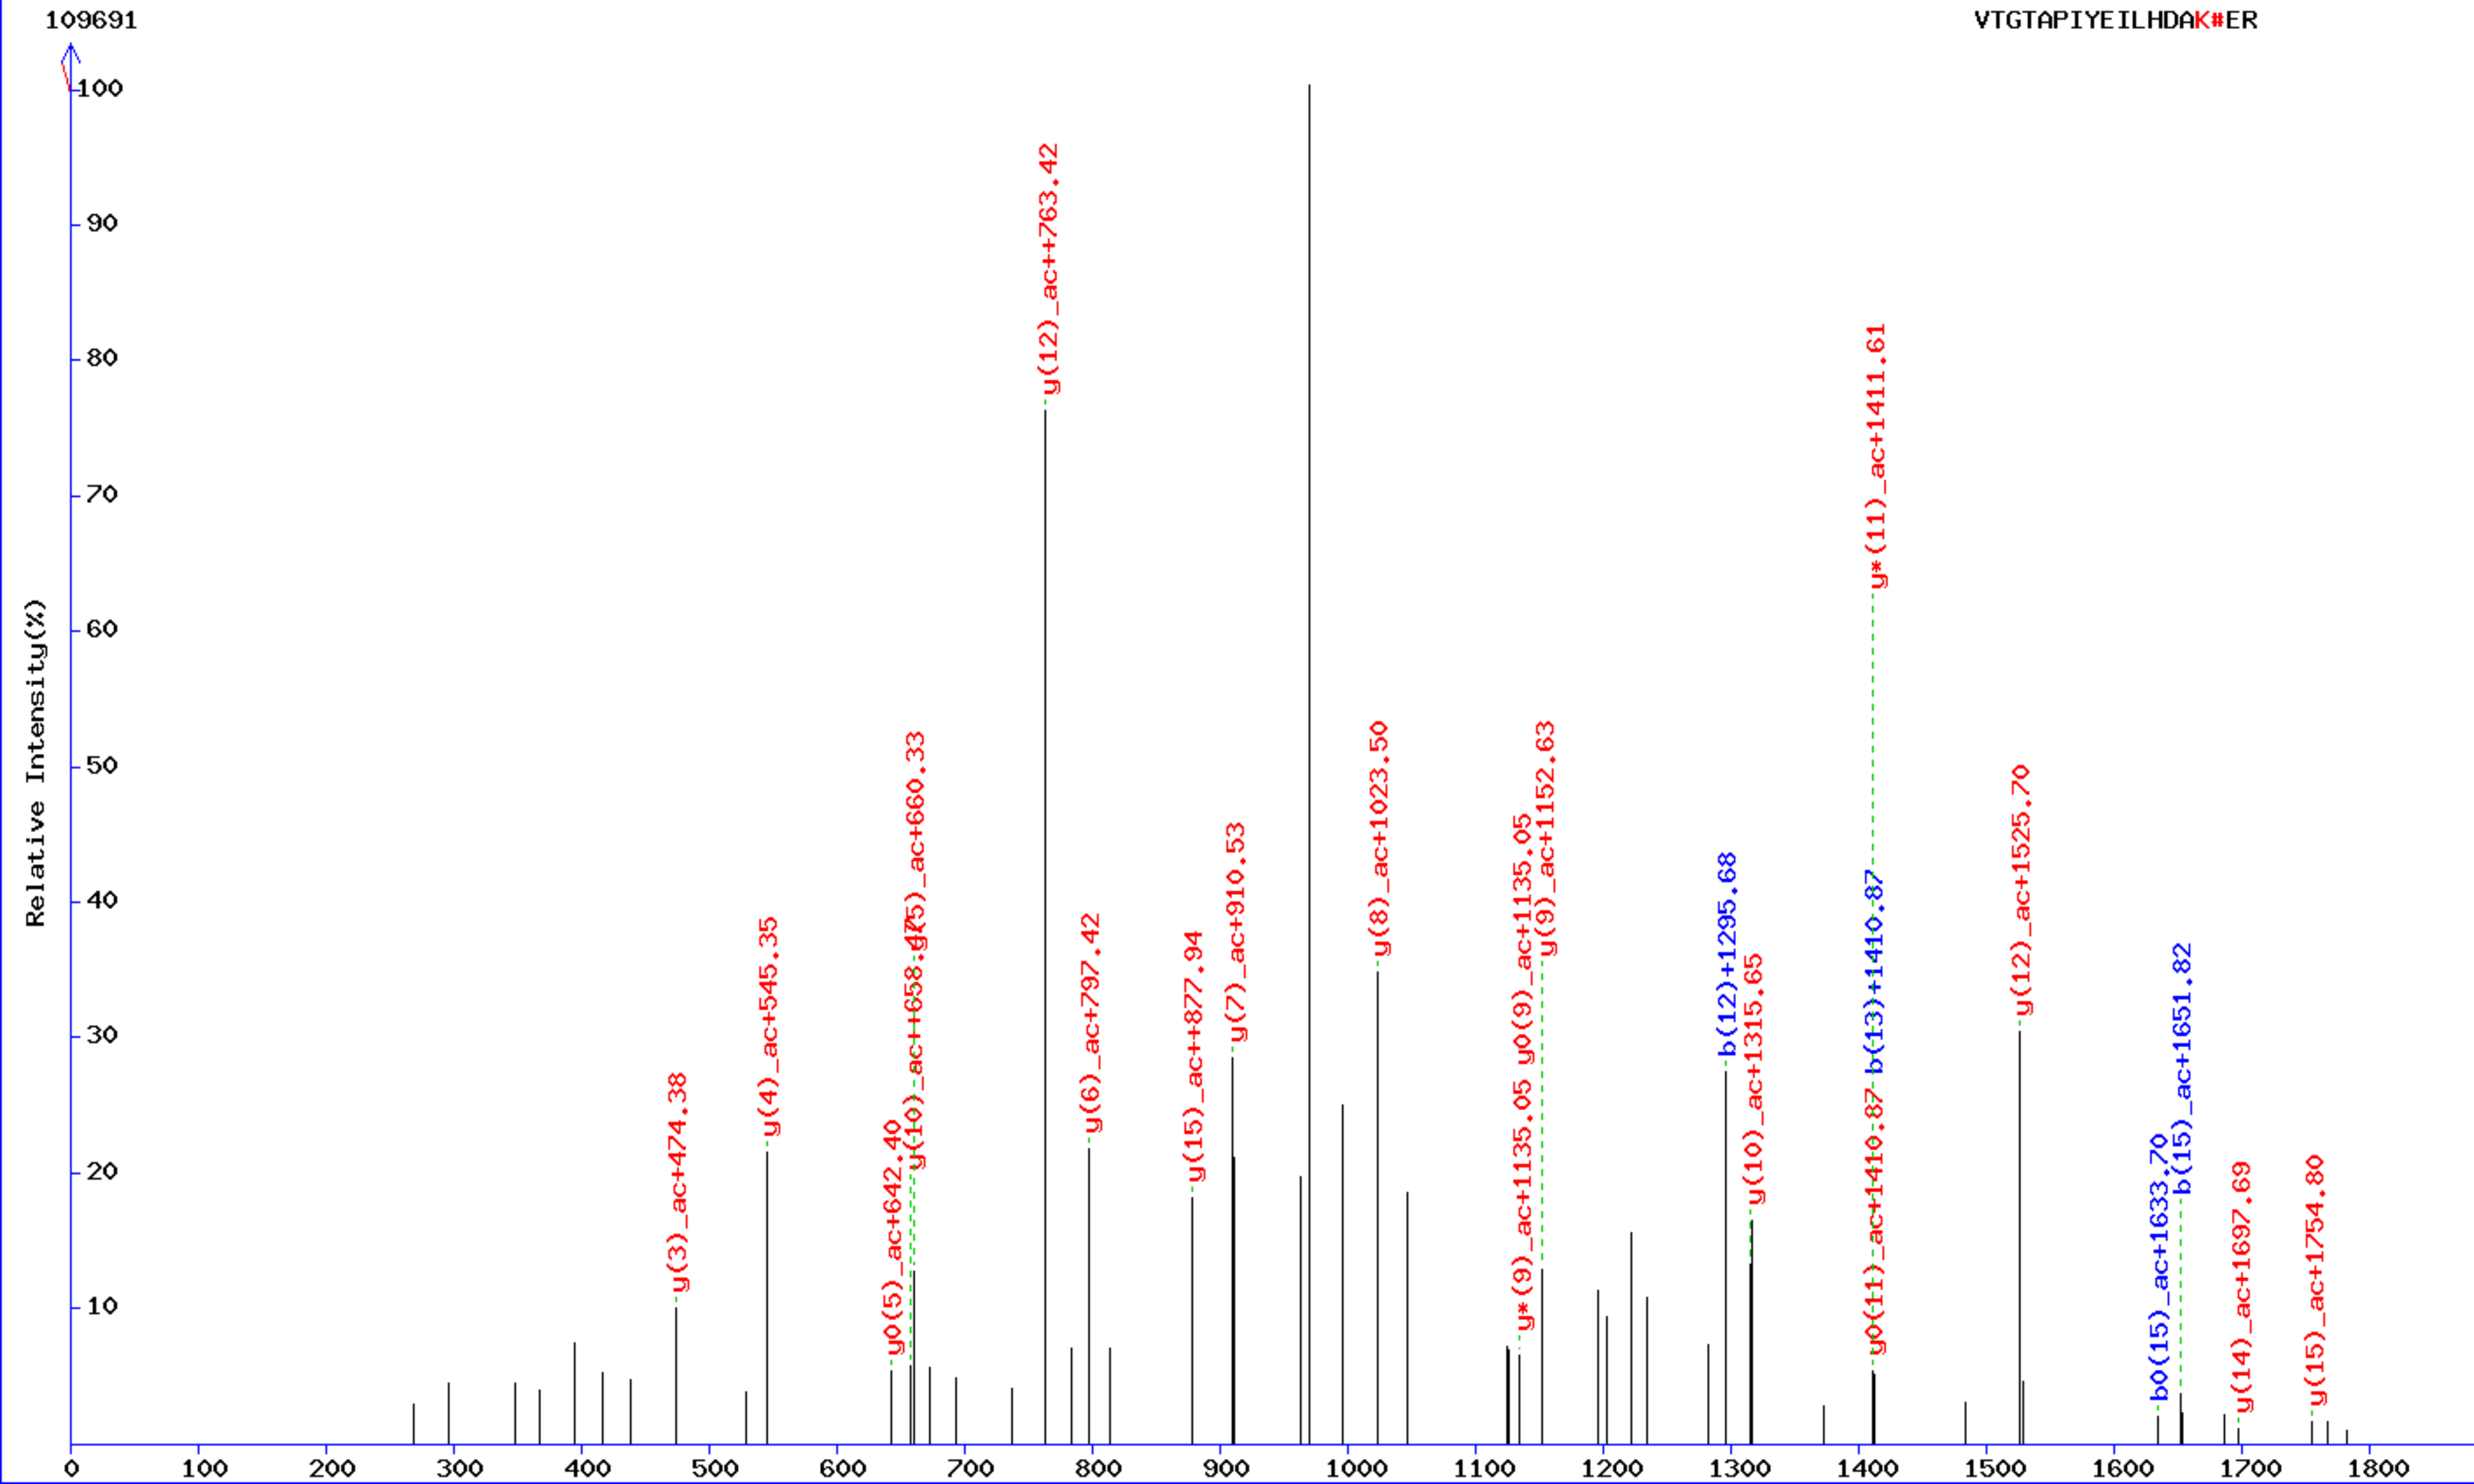

# gi|148660205 MRA\_0445 molecular chaperone GroEL

QEAVLEDPYILLVSSK#VSTVK

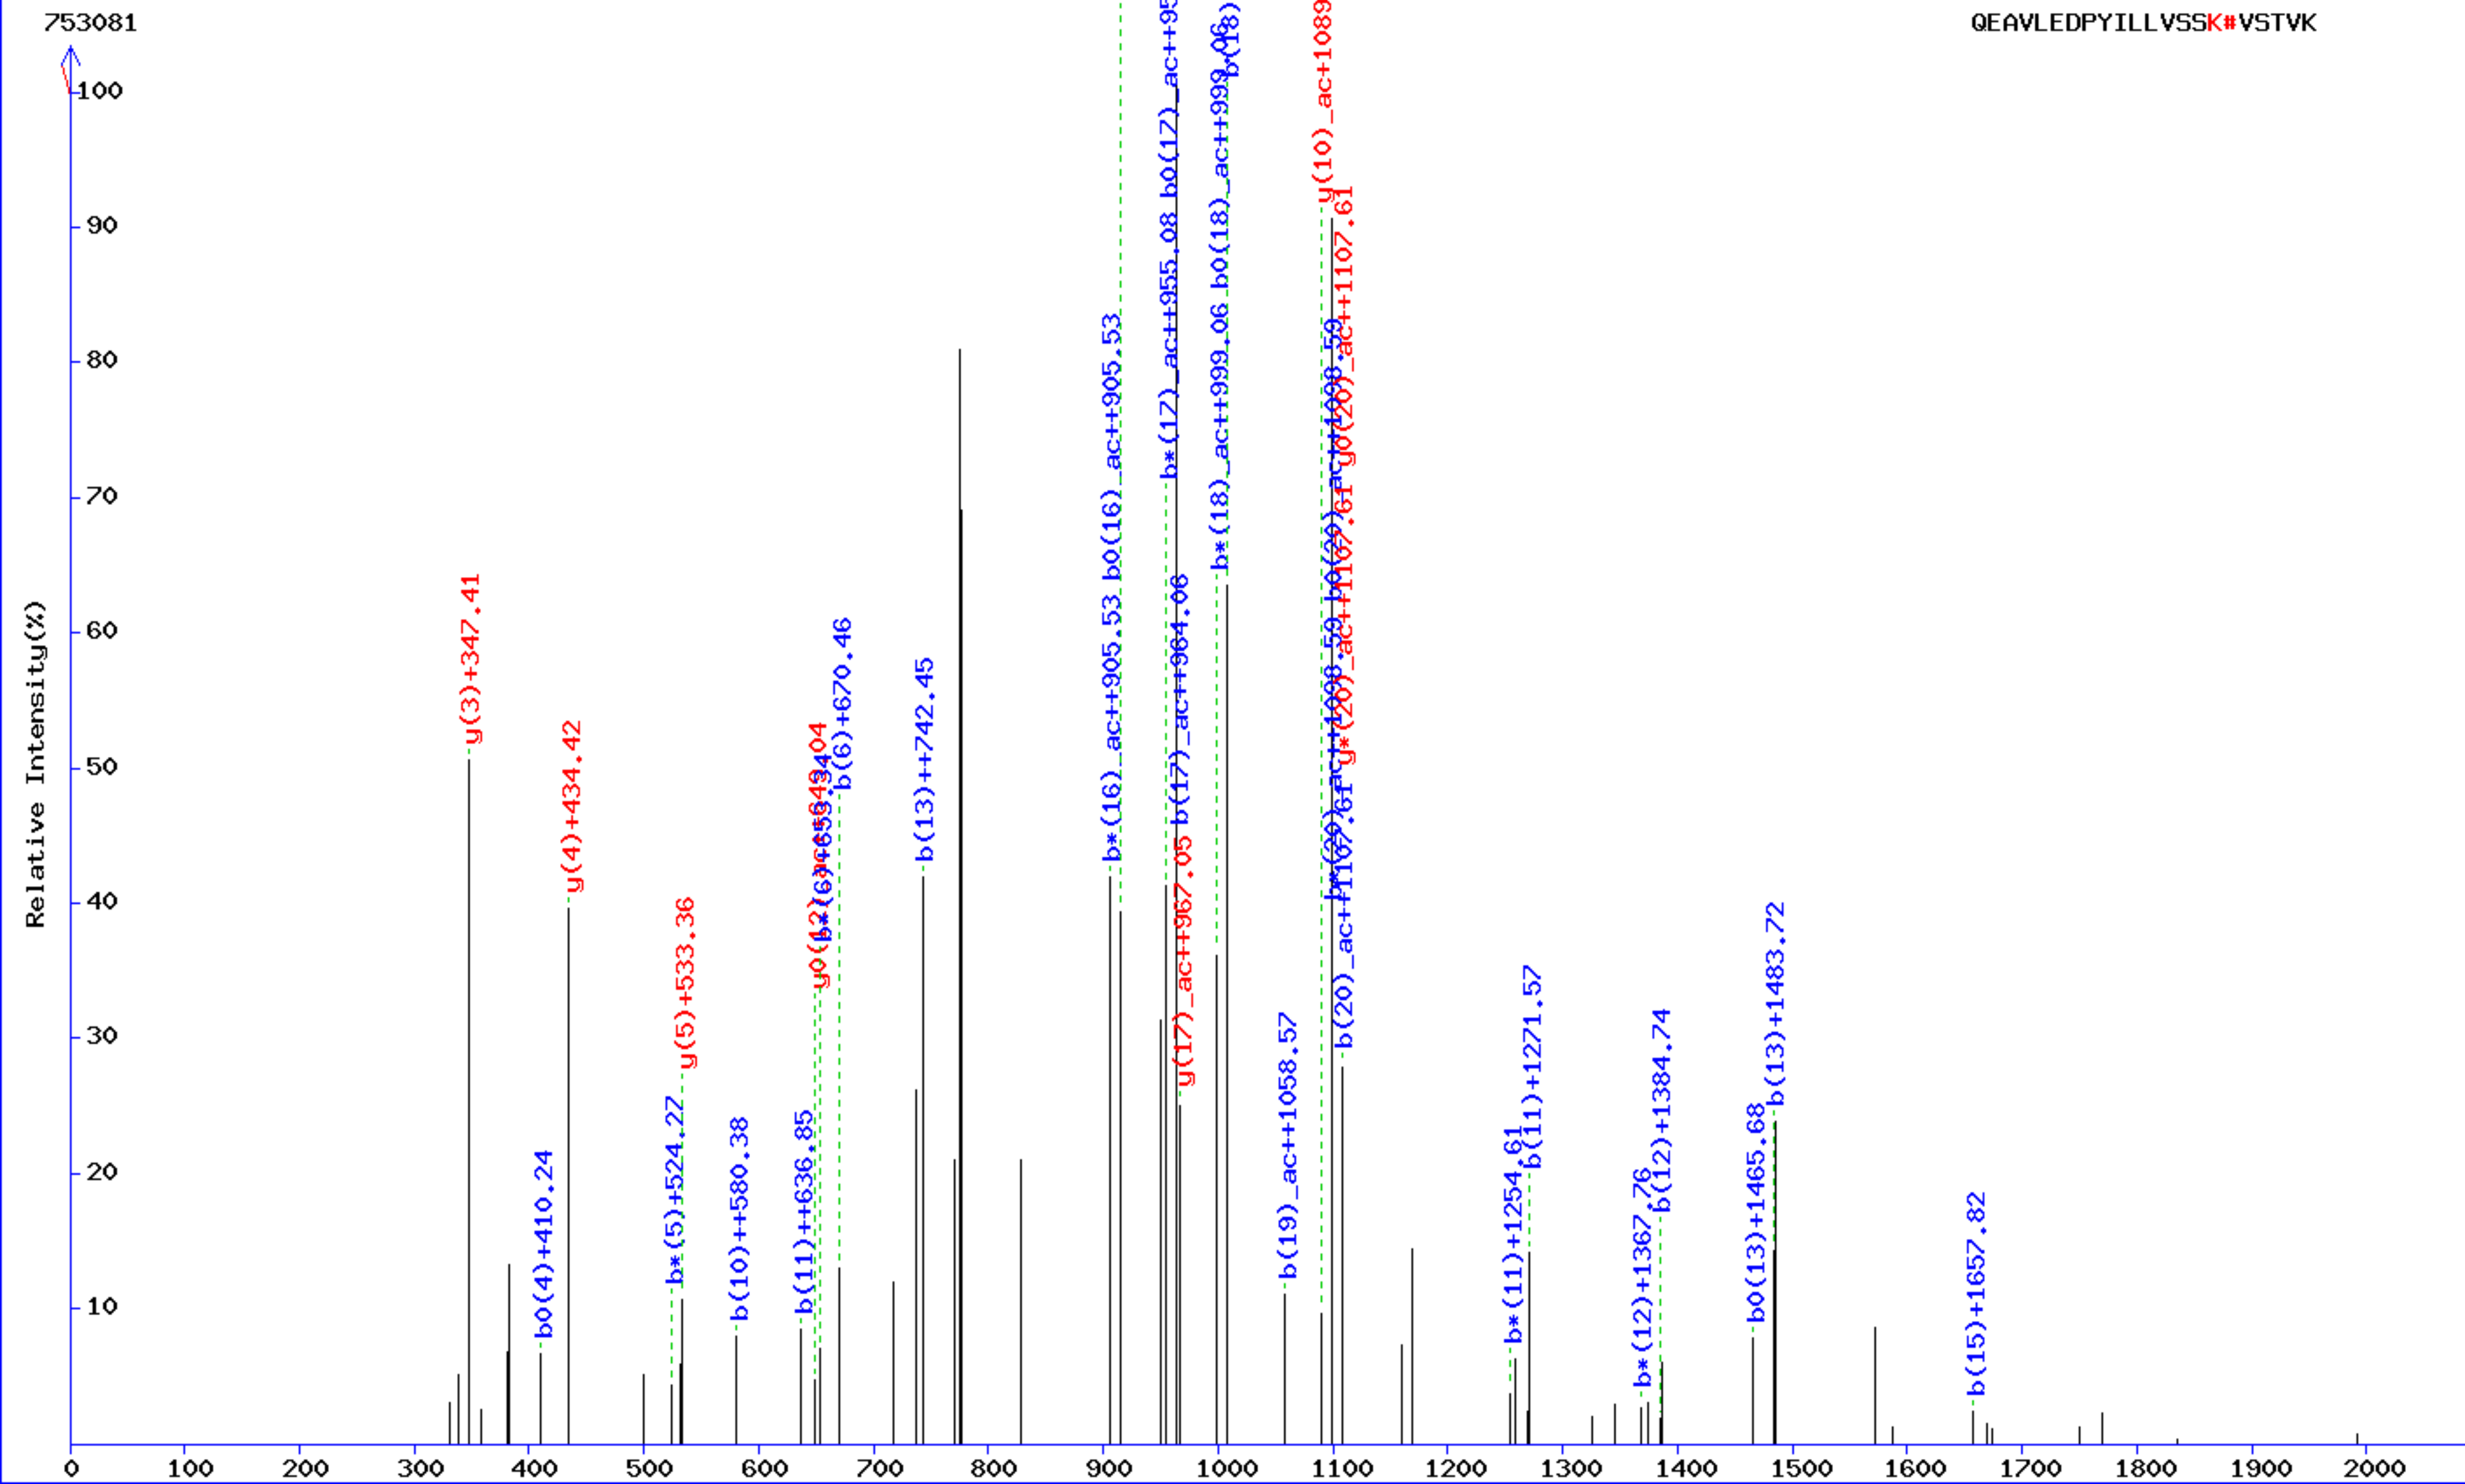

# gi|148660205 MRA\_0445 molecular chaperone GroEL

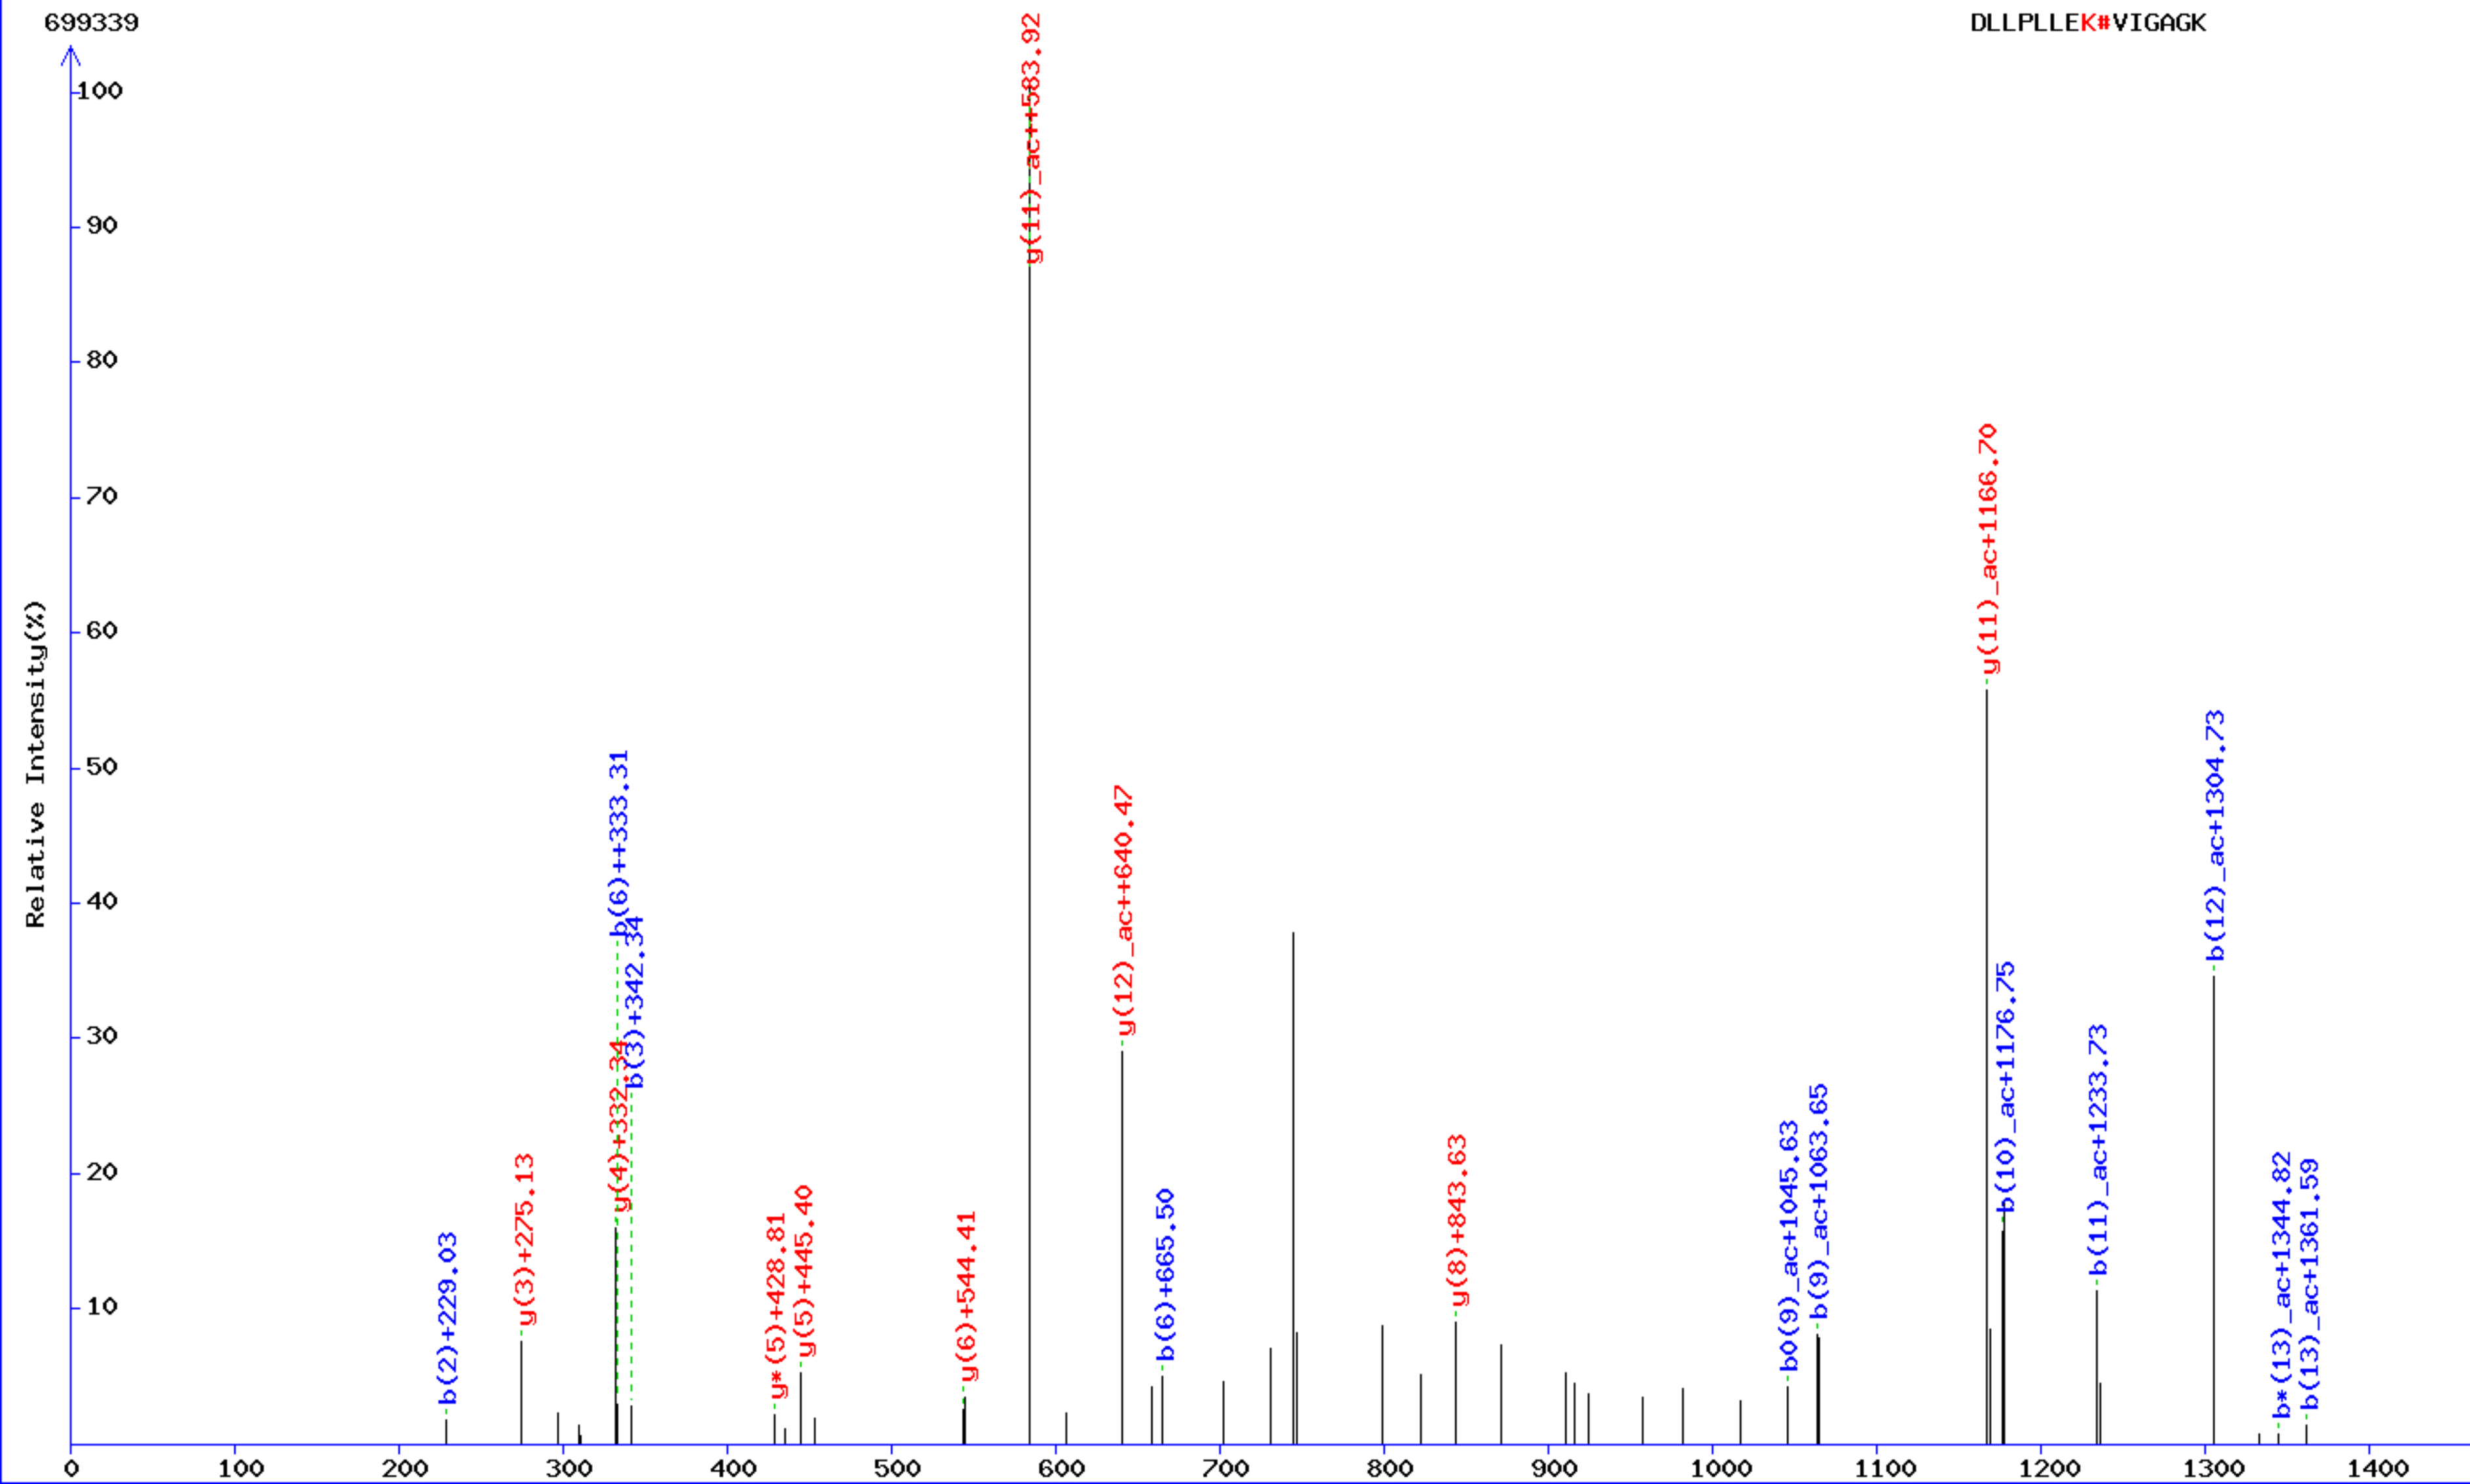

# gi|148662726 MRA\_2907 ribosome recycling factor

AEK#DLDK

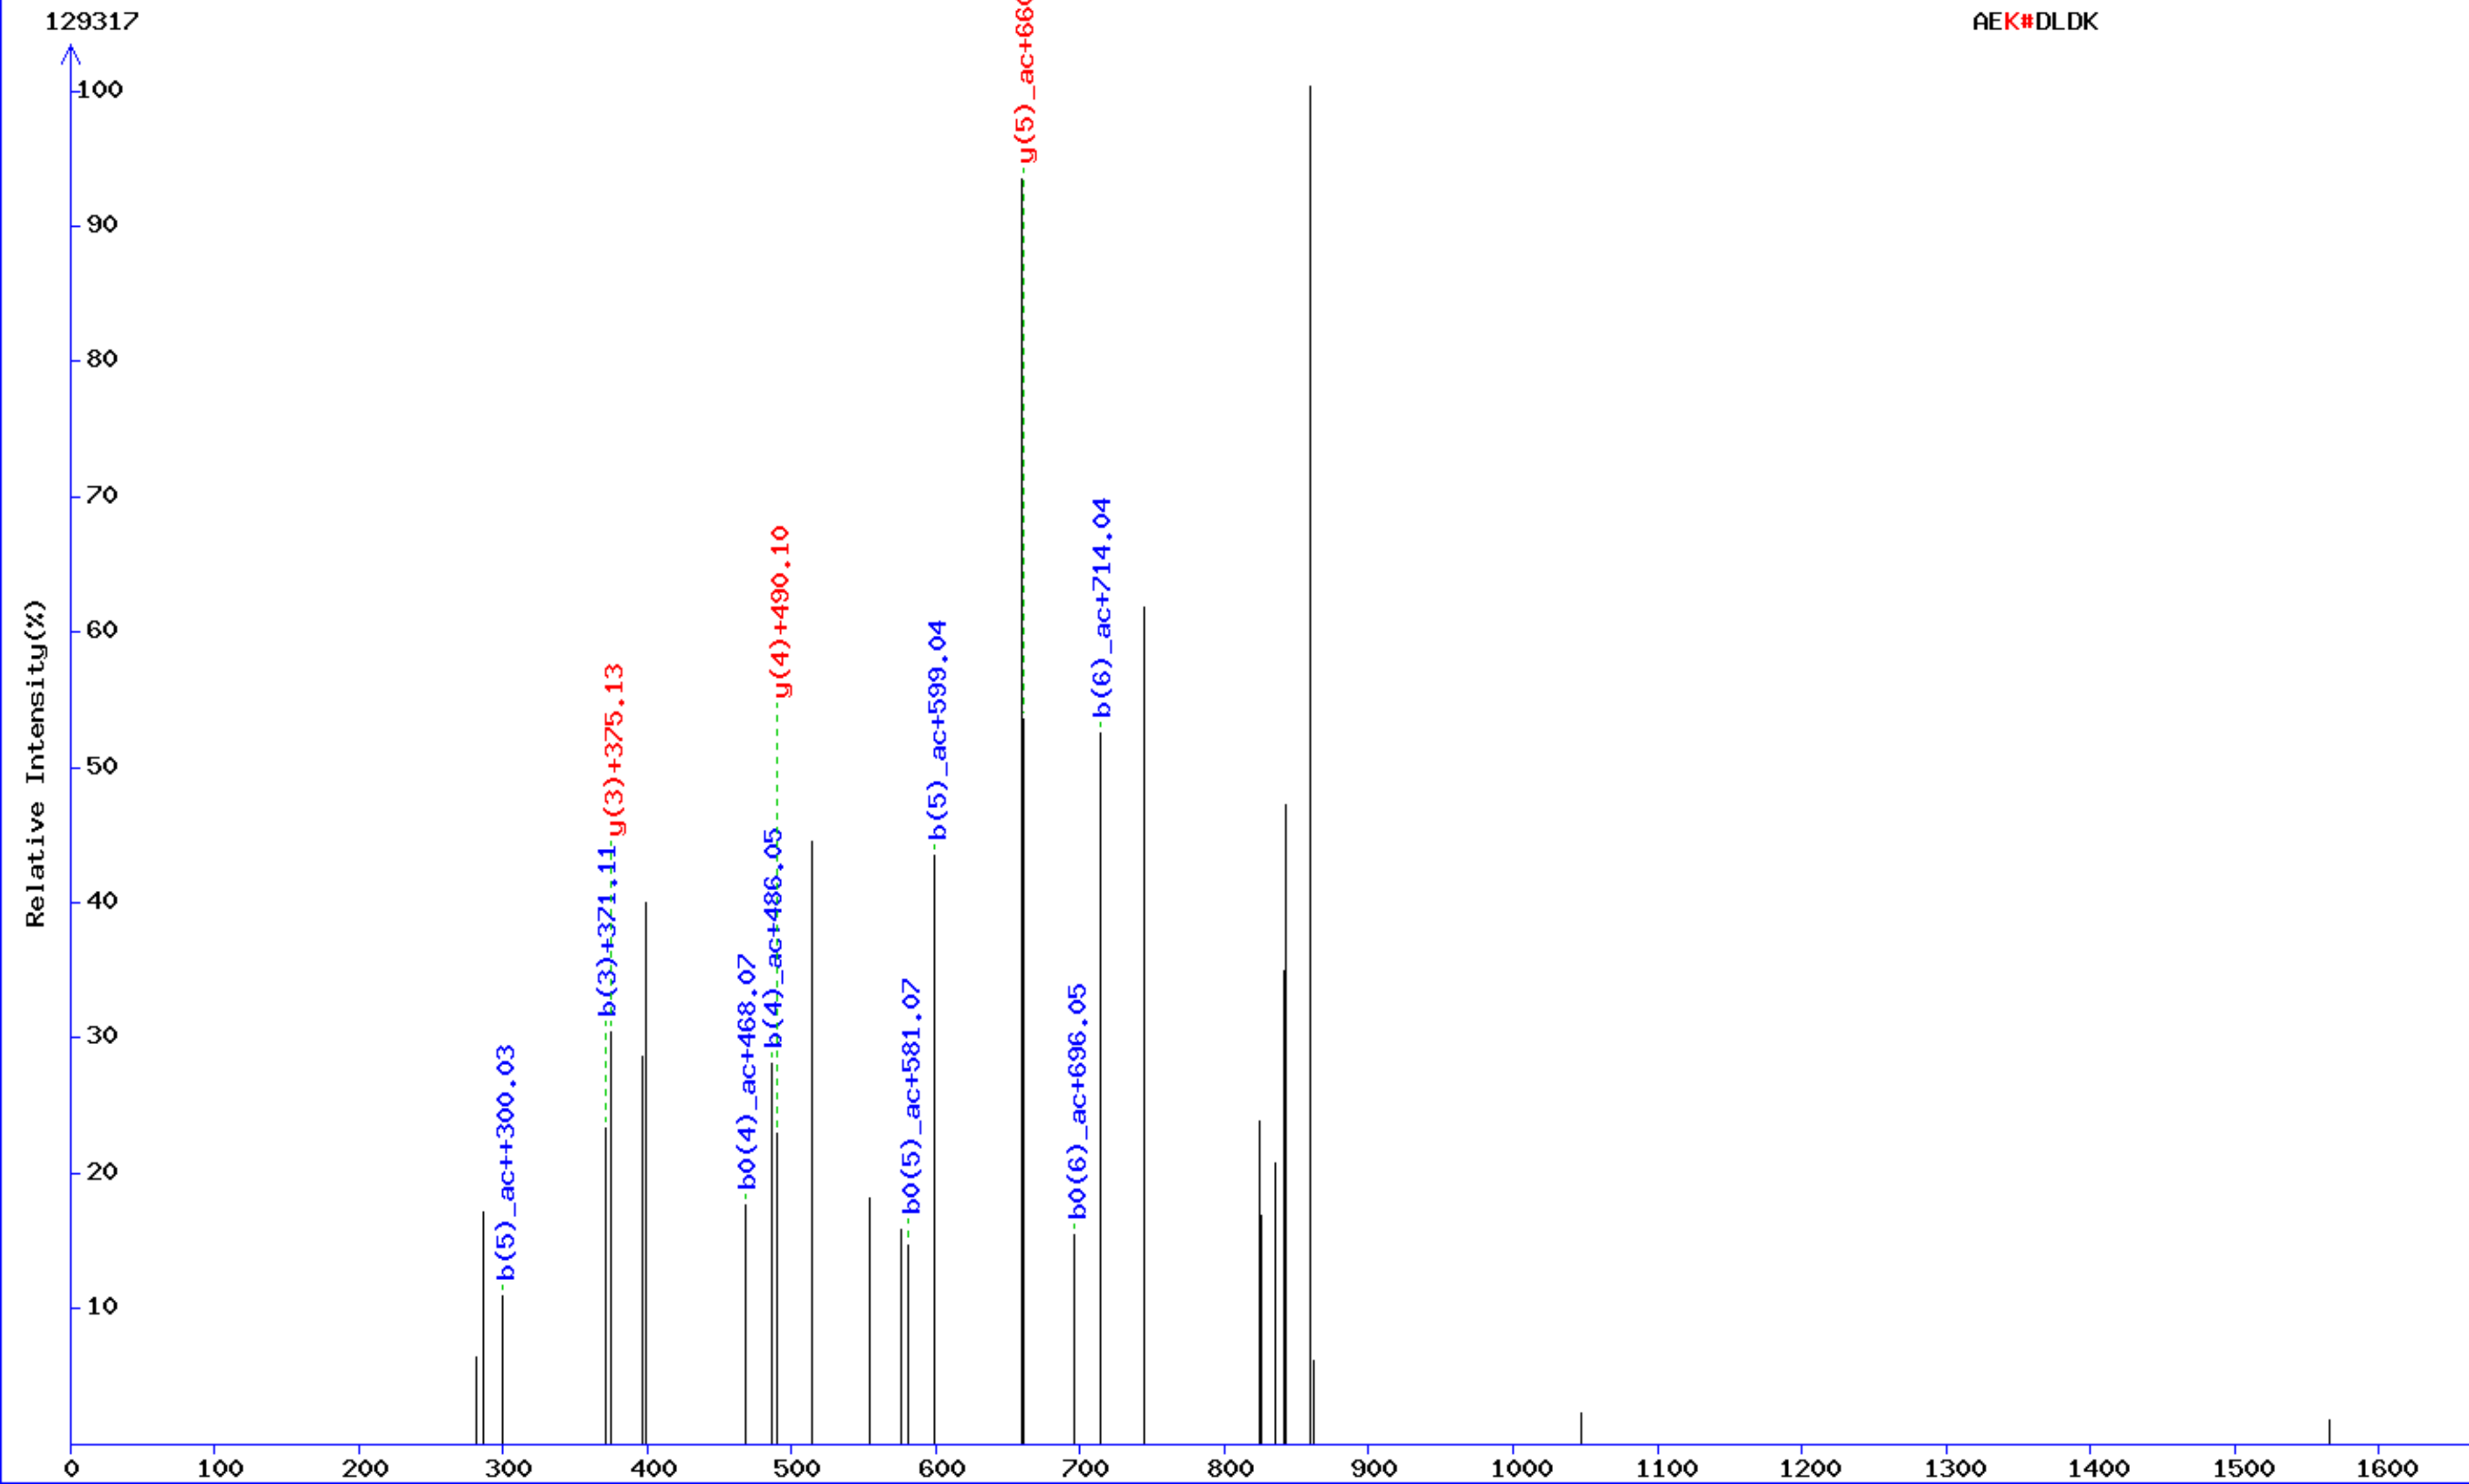

# gi|148663668 MRA\_3840 polyketide synthase

DVVEK#EPEPEPEPK

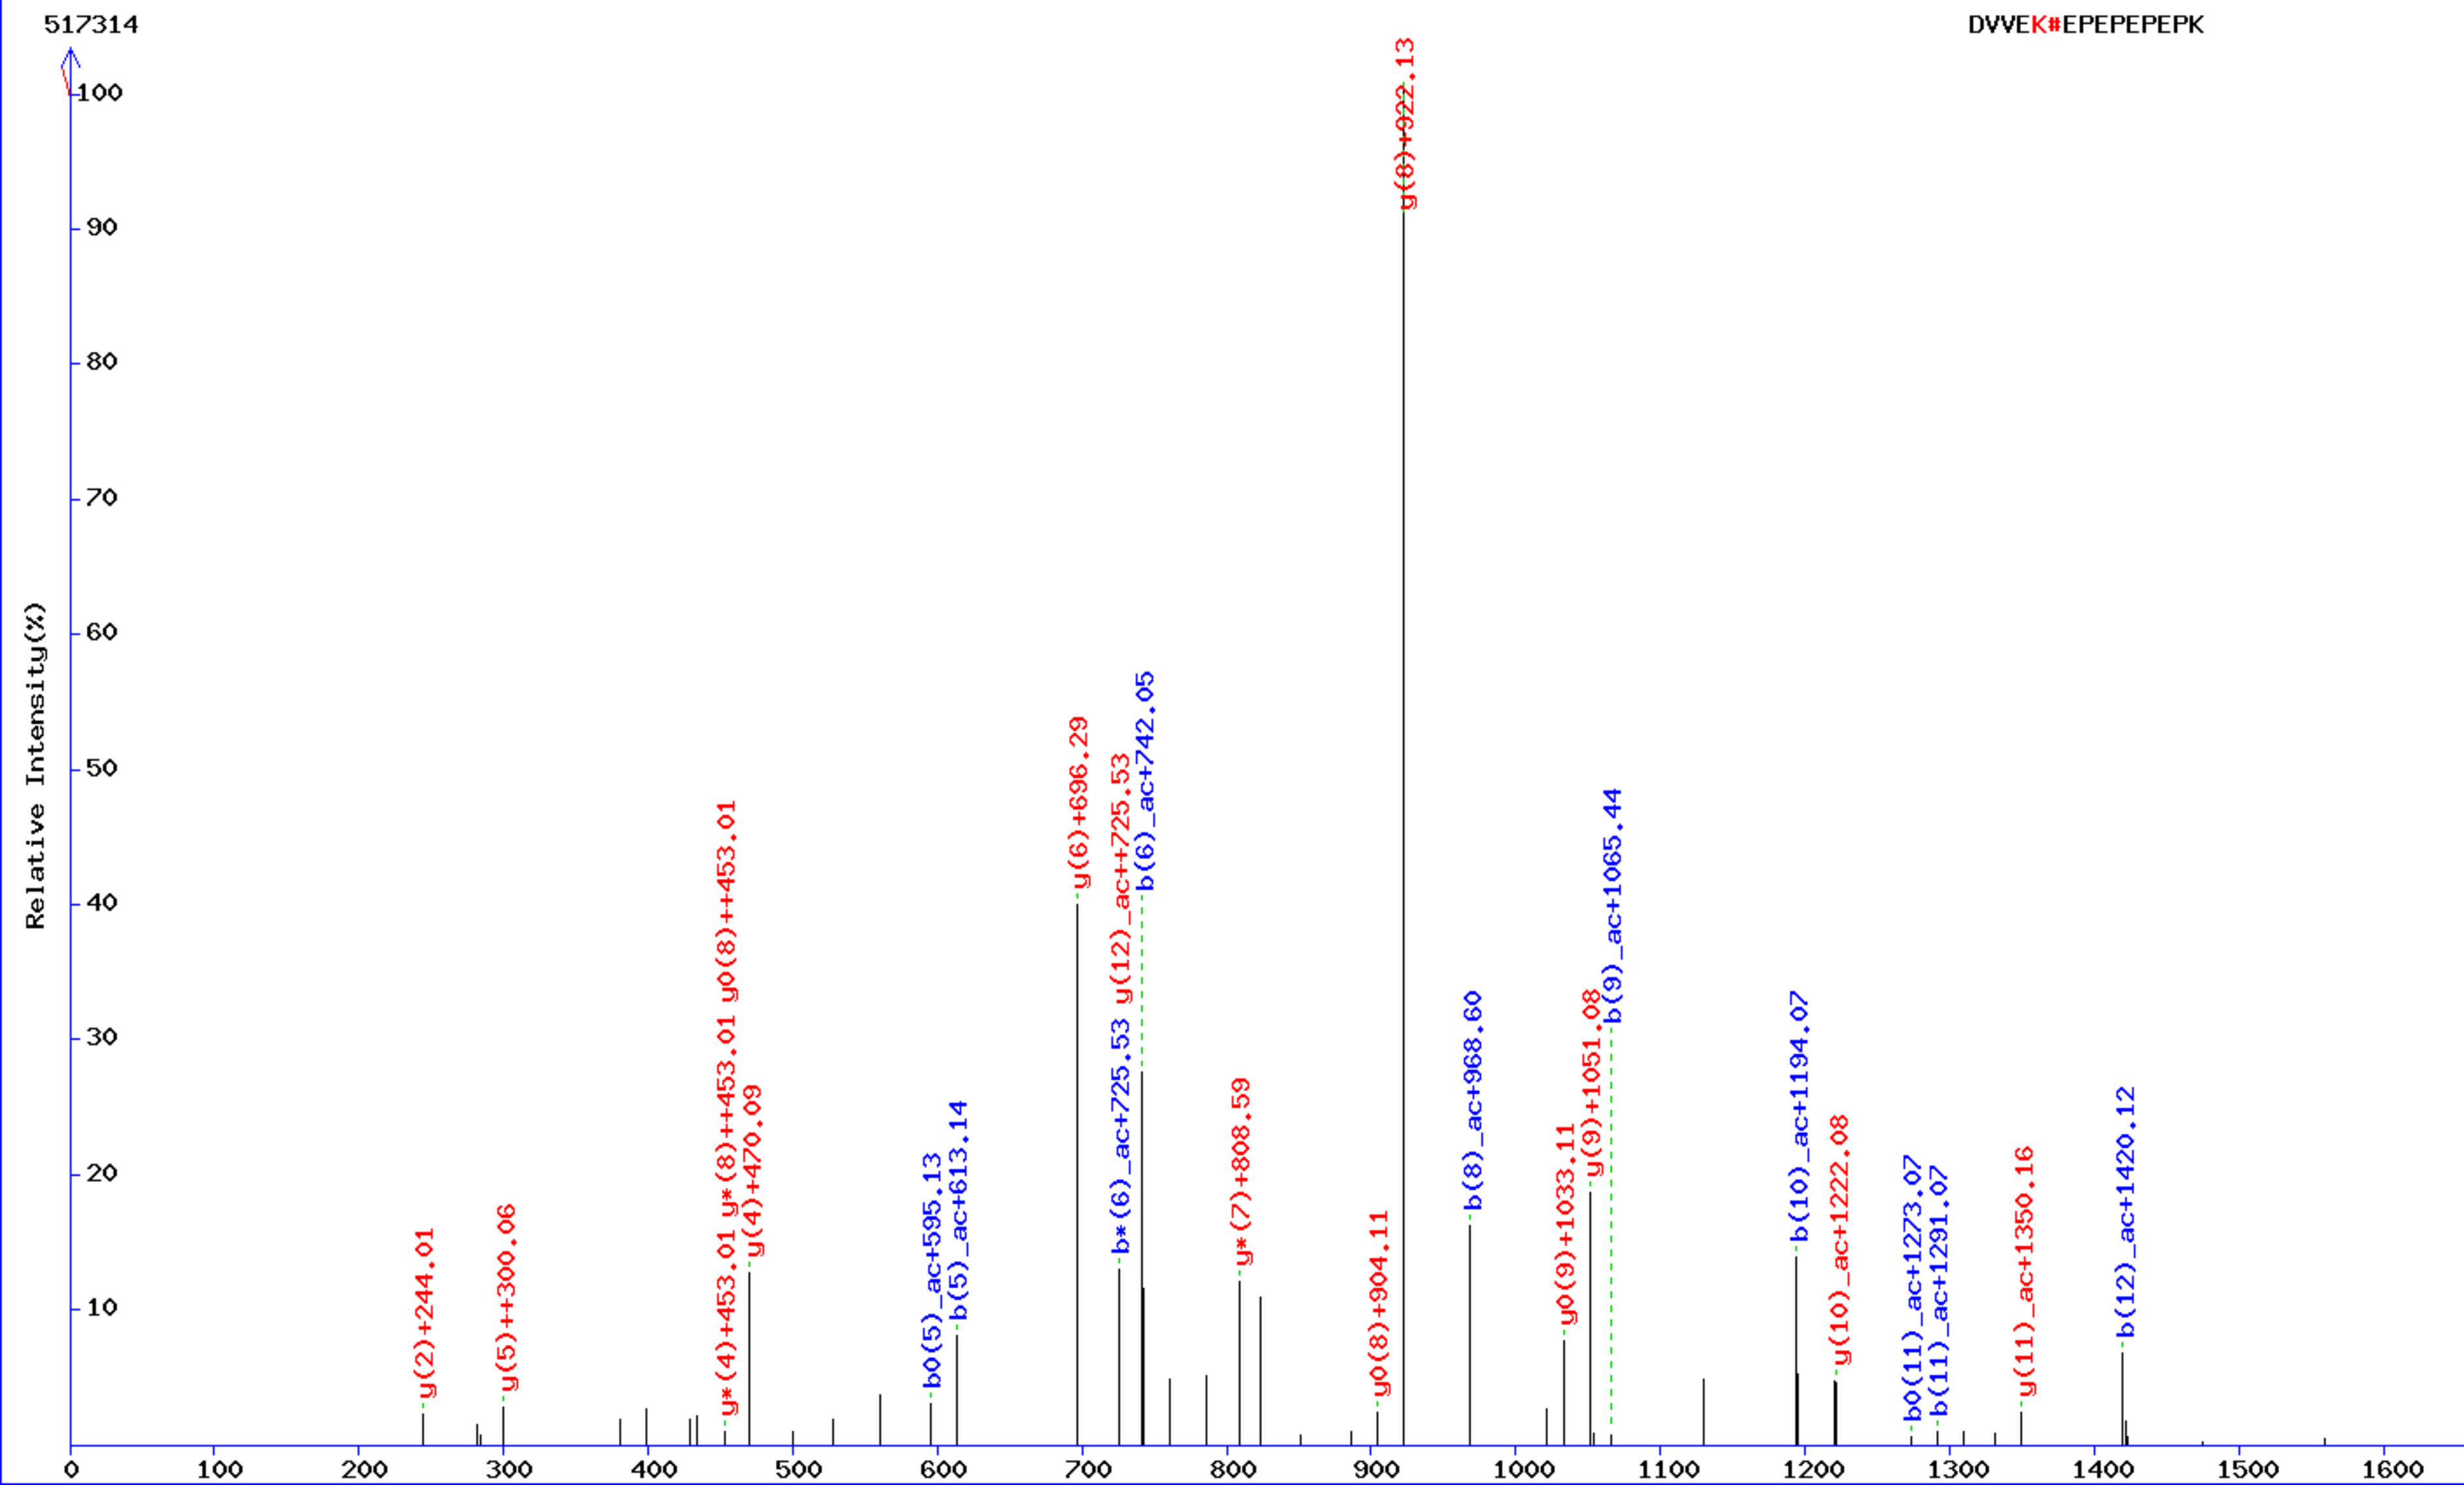

# gi|148662726 MRA\_2907 ribosome recycling factor

EGEAGEDEVGRAEK#DLDK

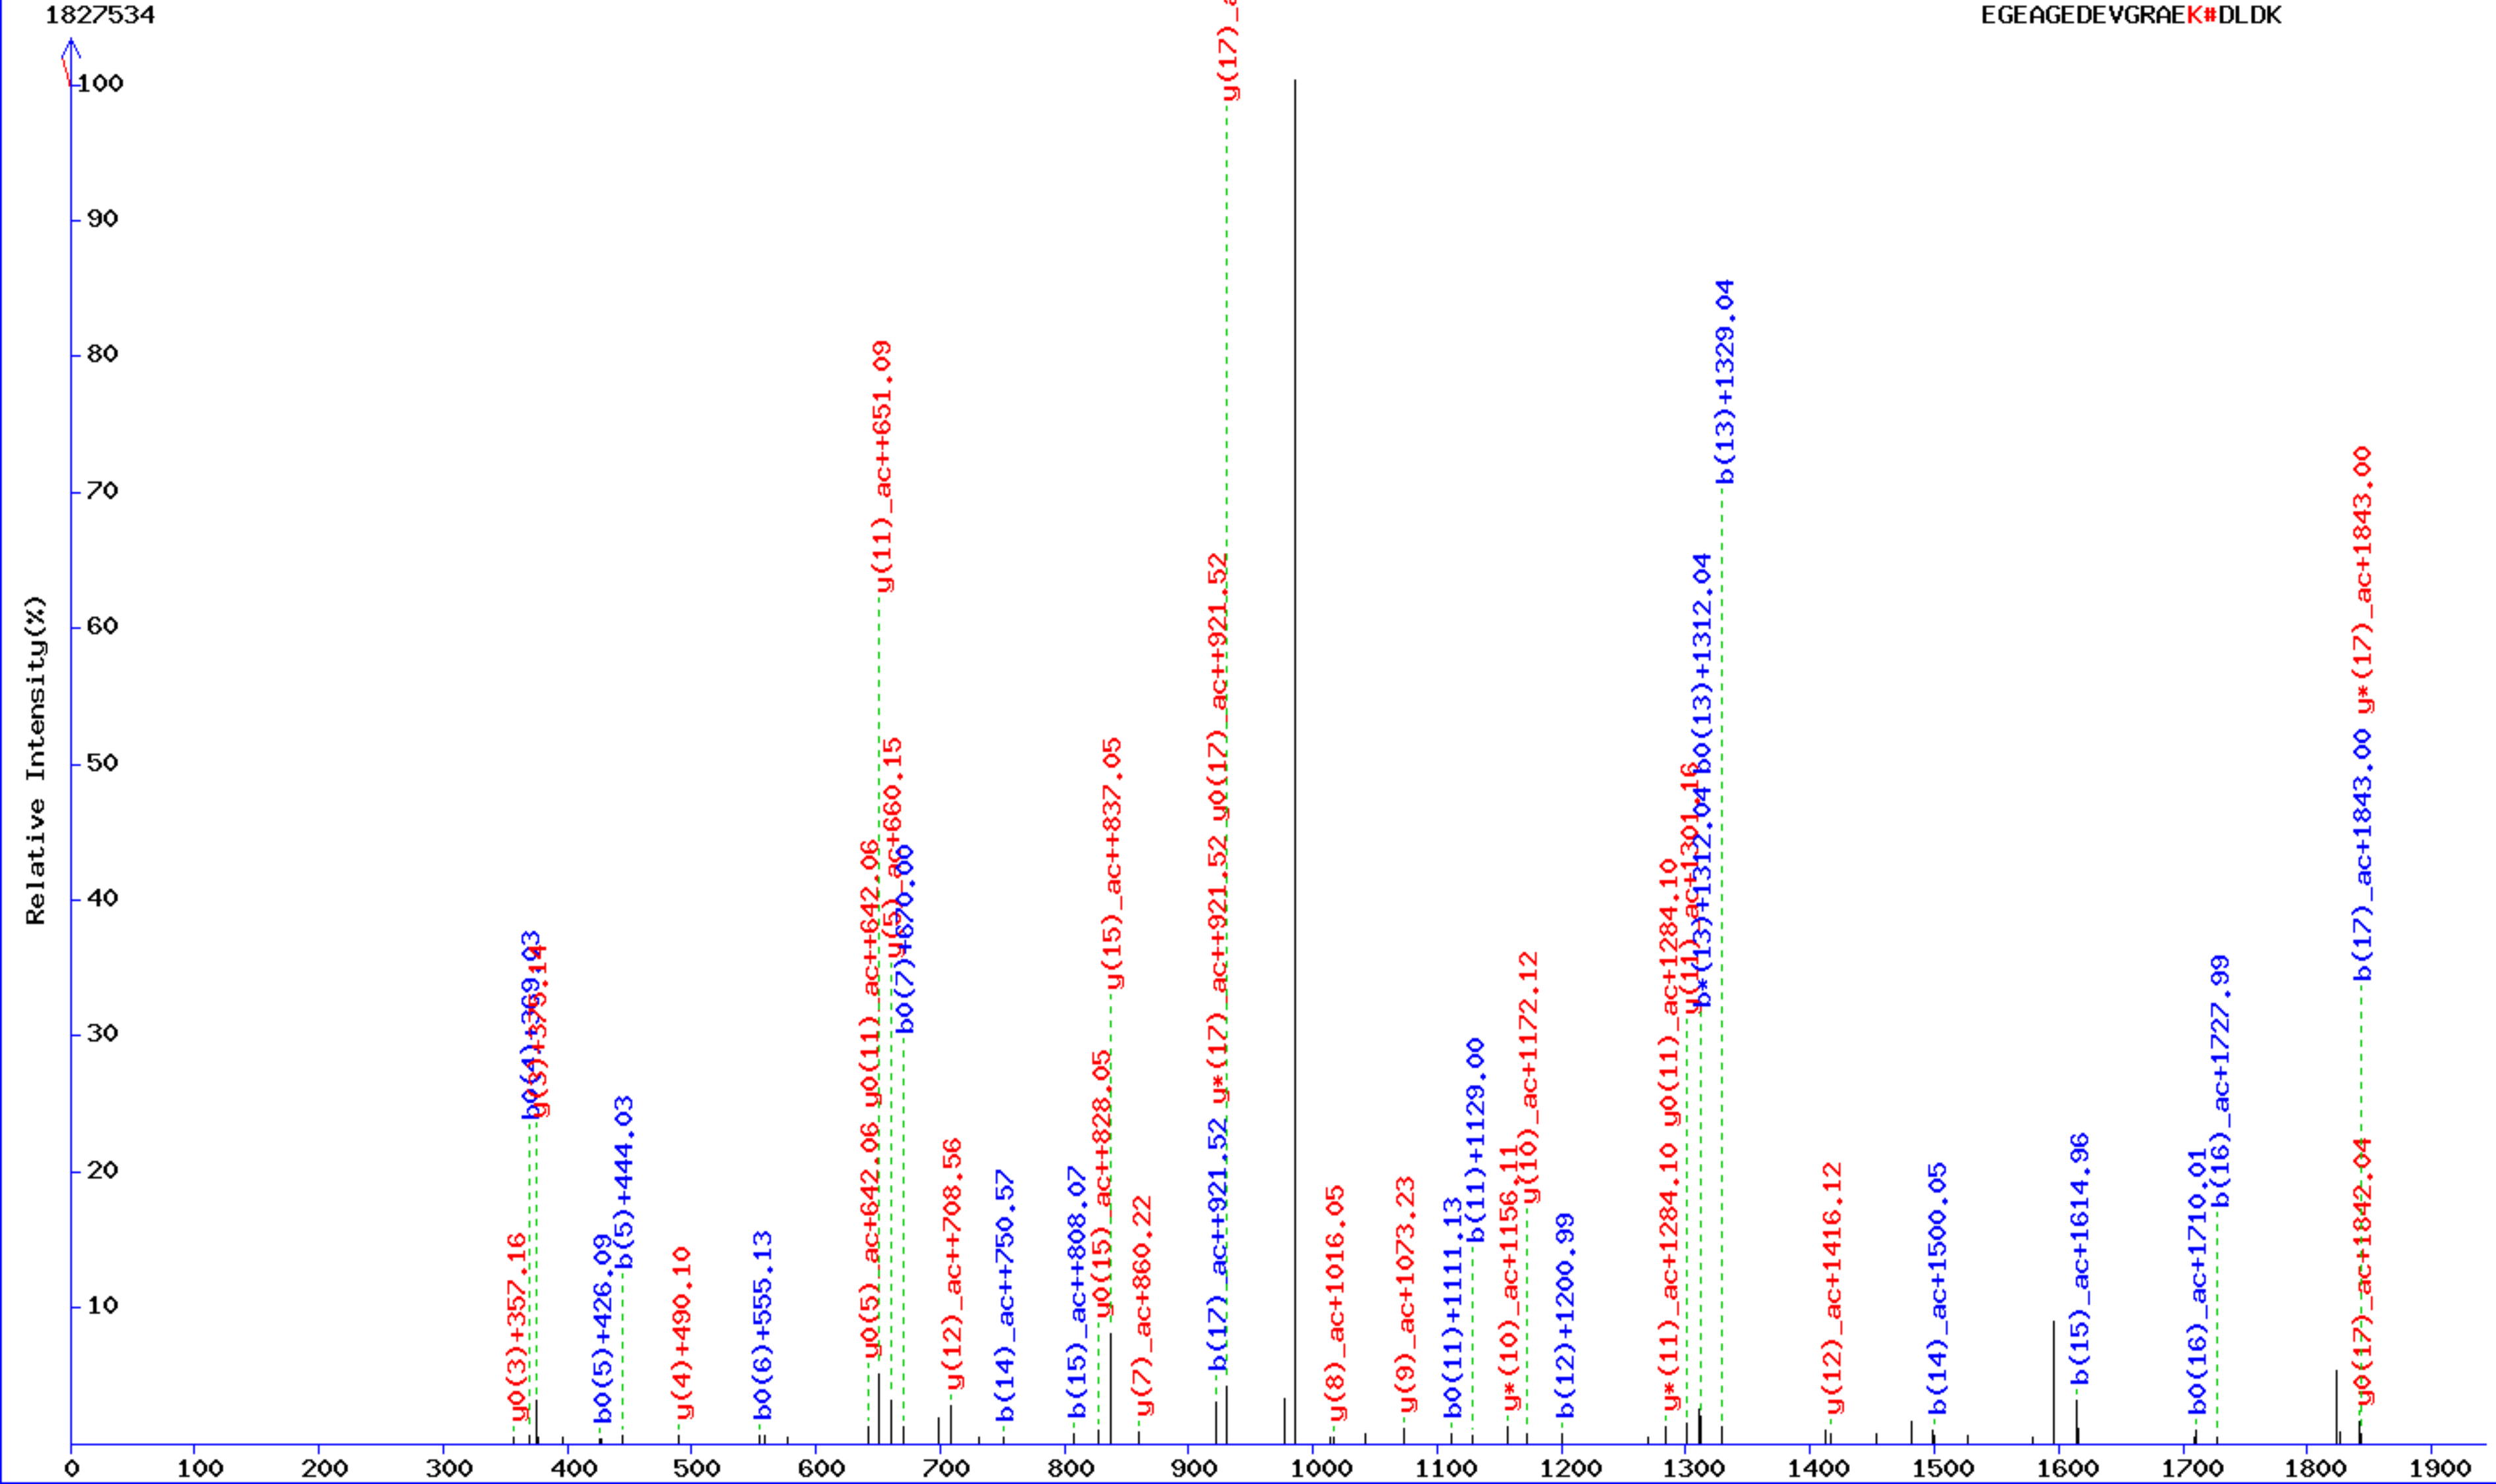

# gi|148660205 MRA\_0445 molecular chaperone GroEL

VALEAPLK#QIAFNSGLEPGVVAEK#VR

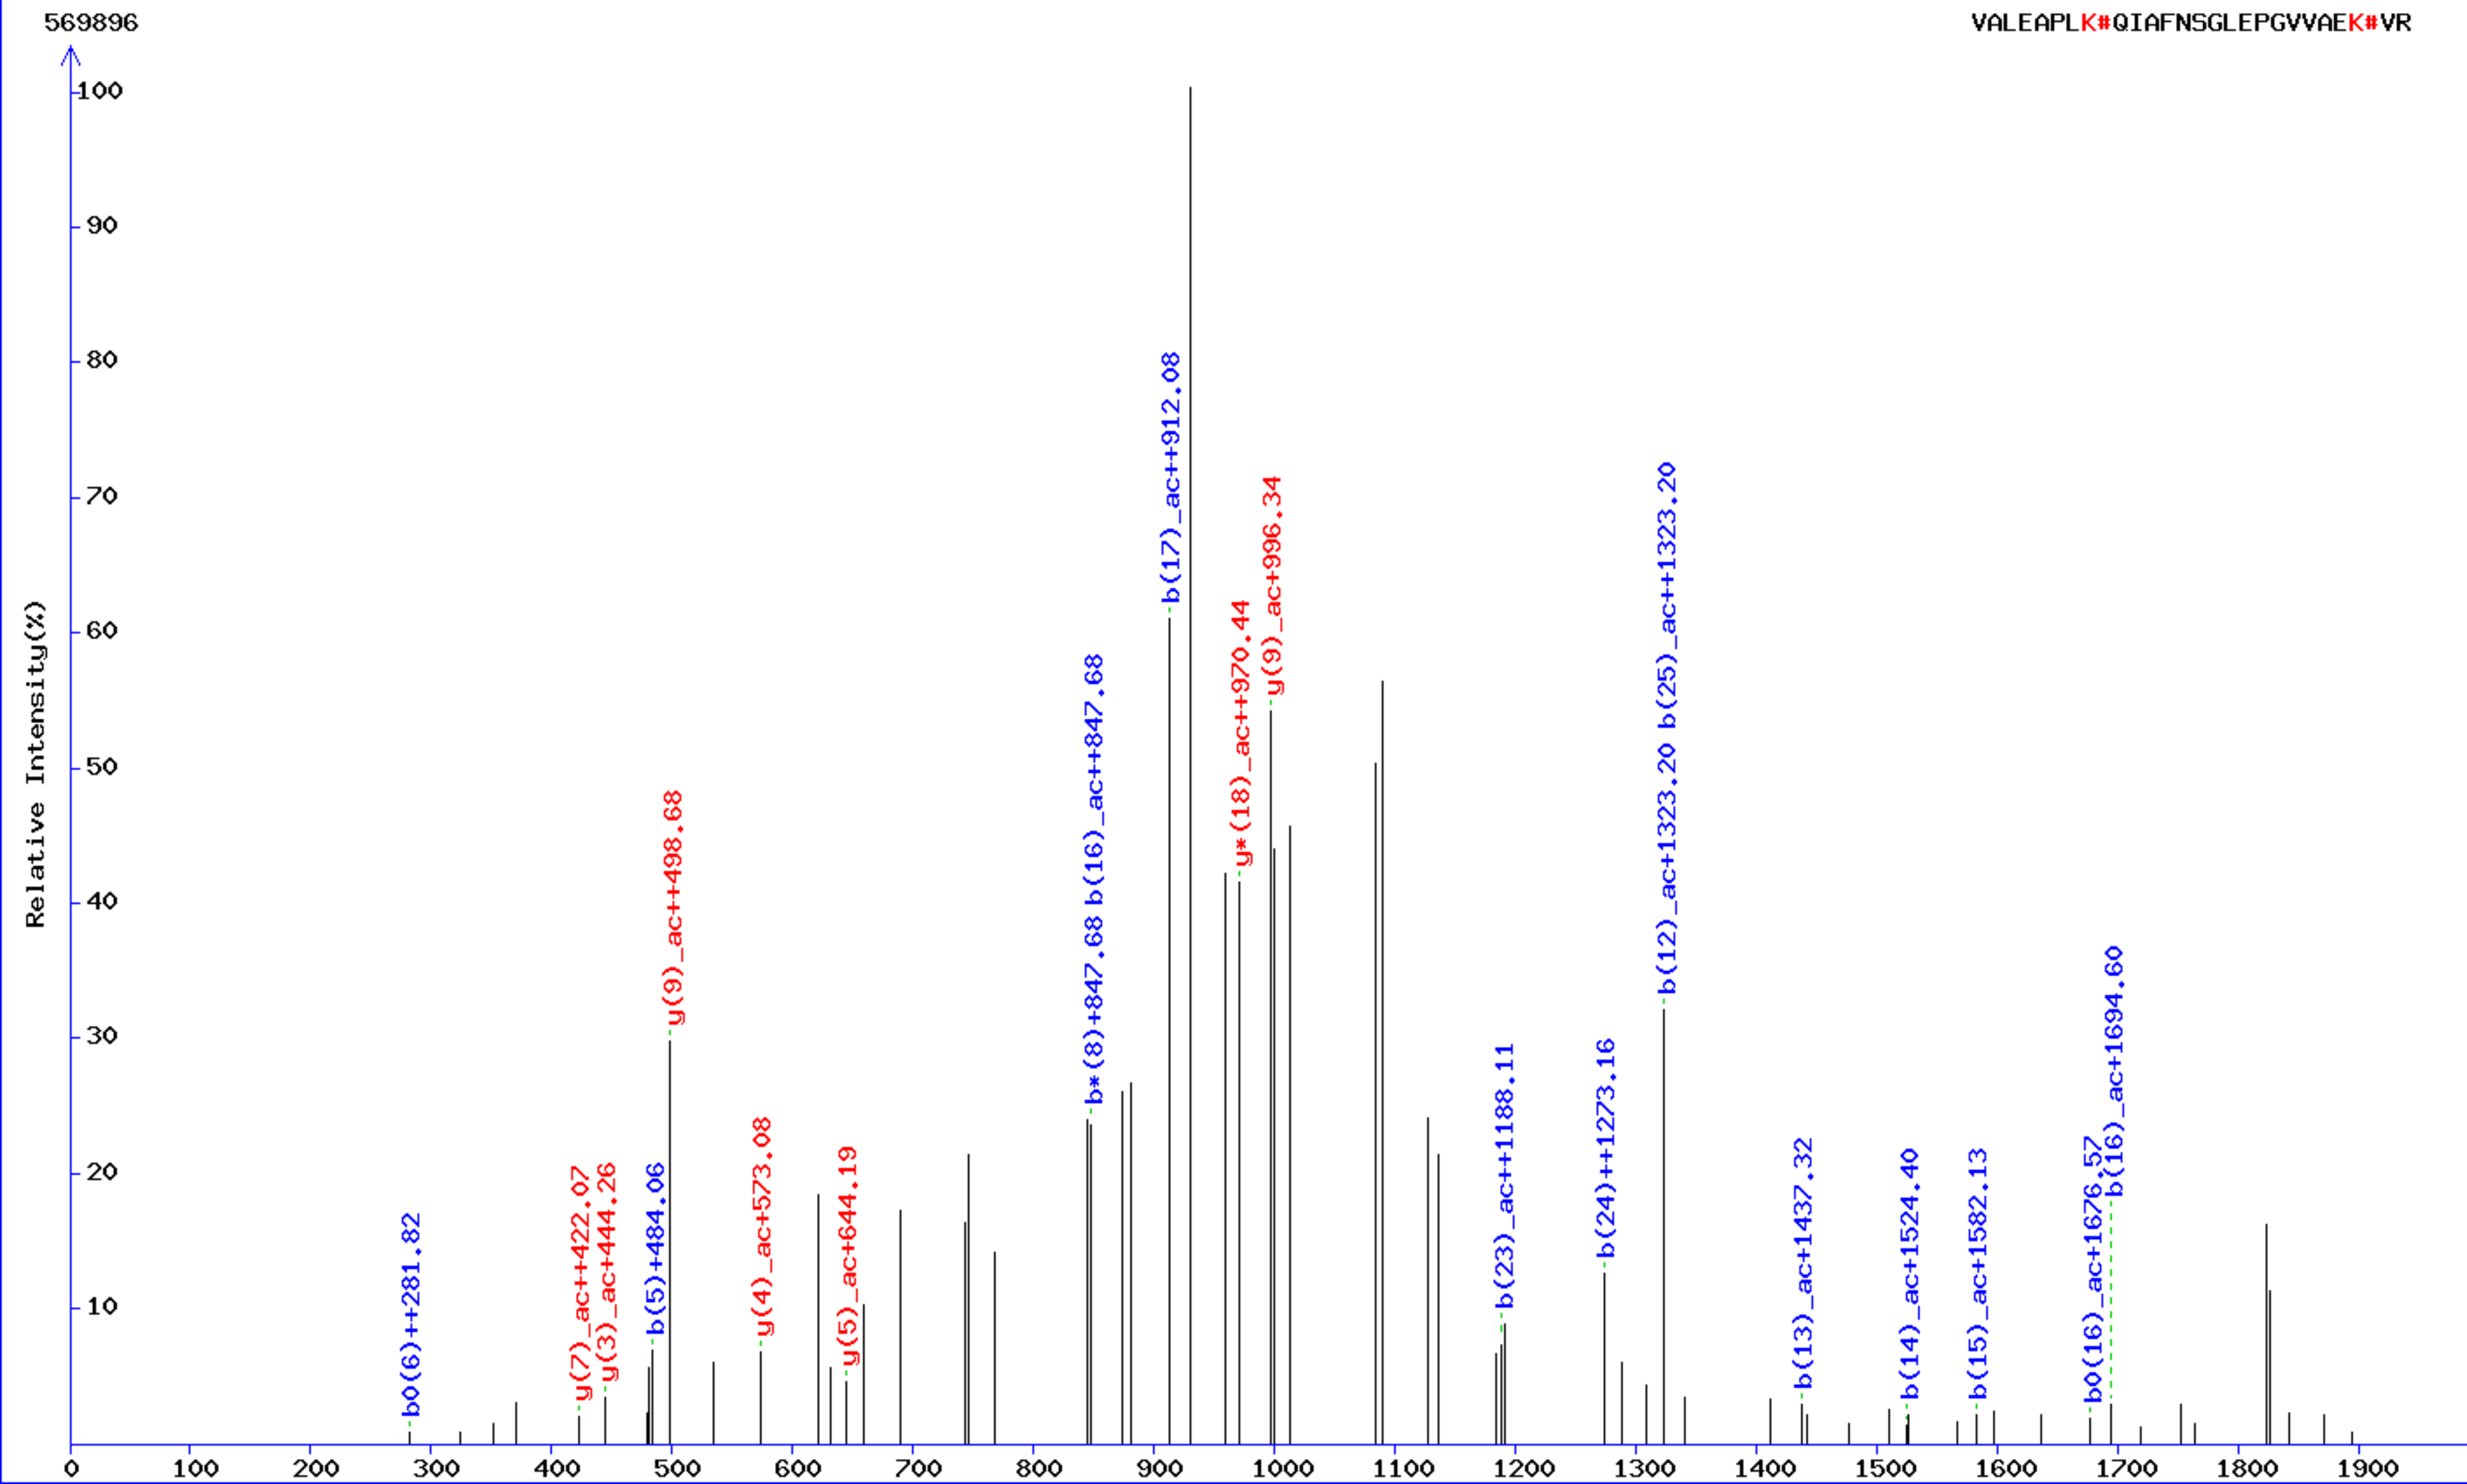

gi|148662065 MRA\_2264 acyl carrier protein

TVGDVVAYIQK#LEEENPEAAGLR

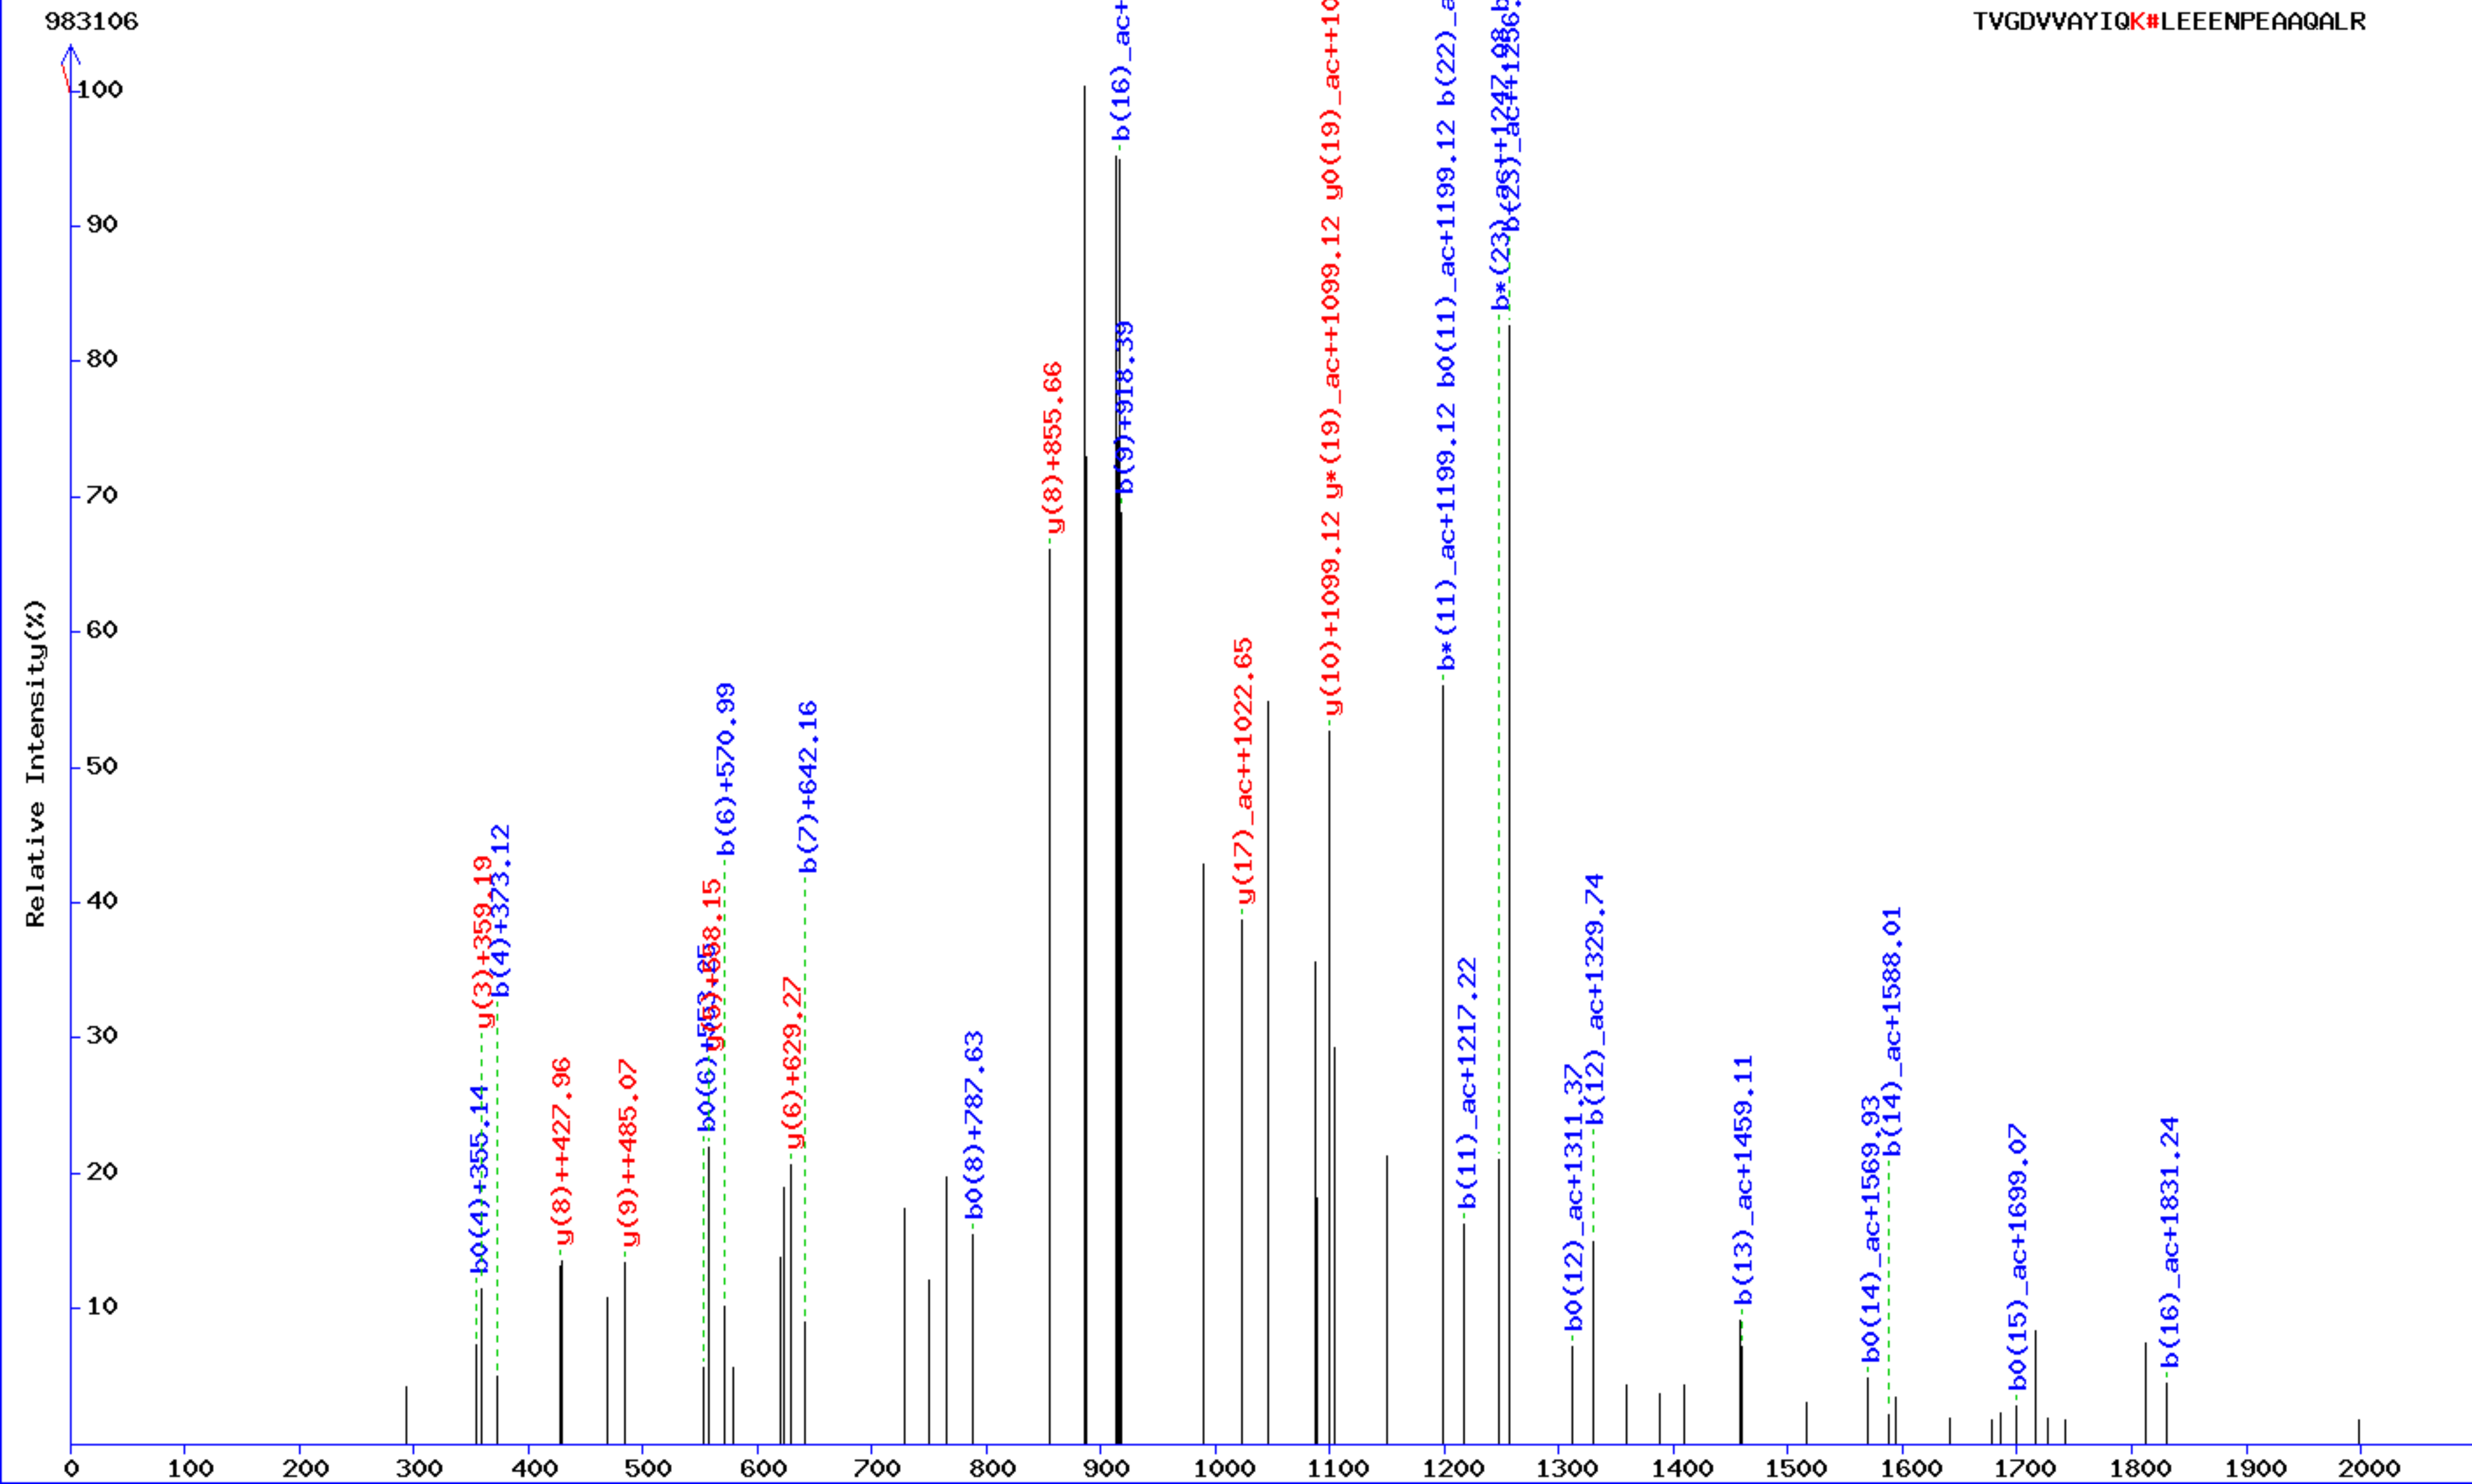



# gi|148660593 MRA\_0825 thiosulfate sulfurtransferase CysA2

AANEDGTFK#SDEELAK

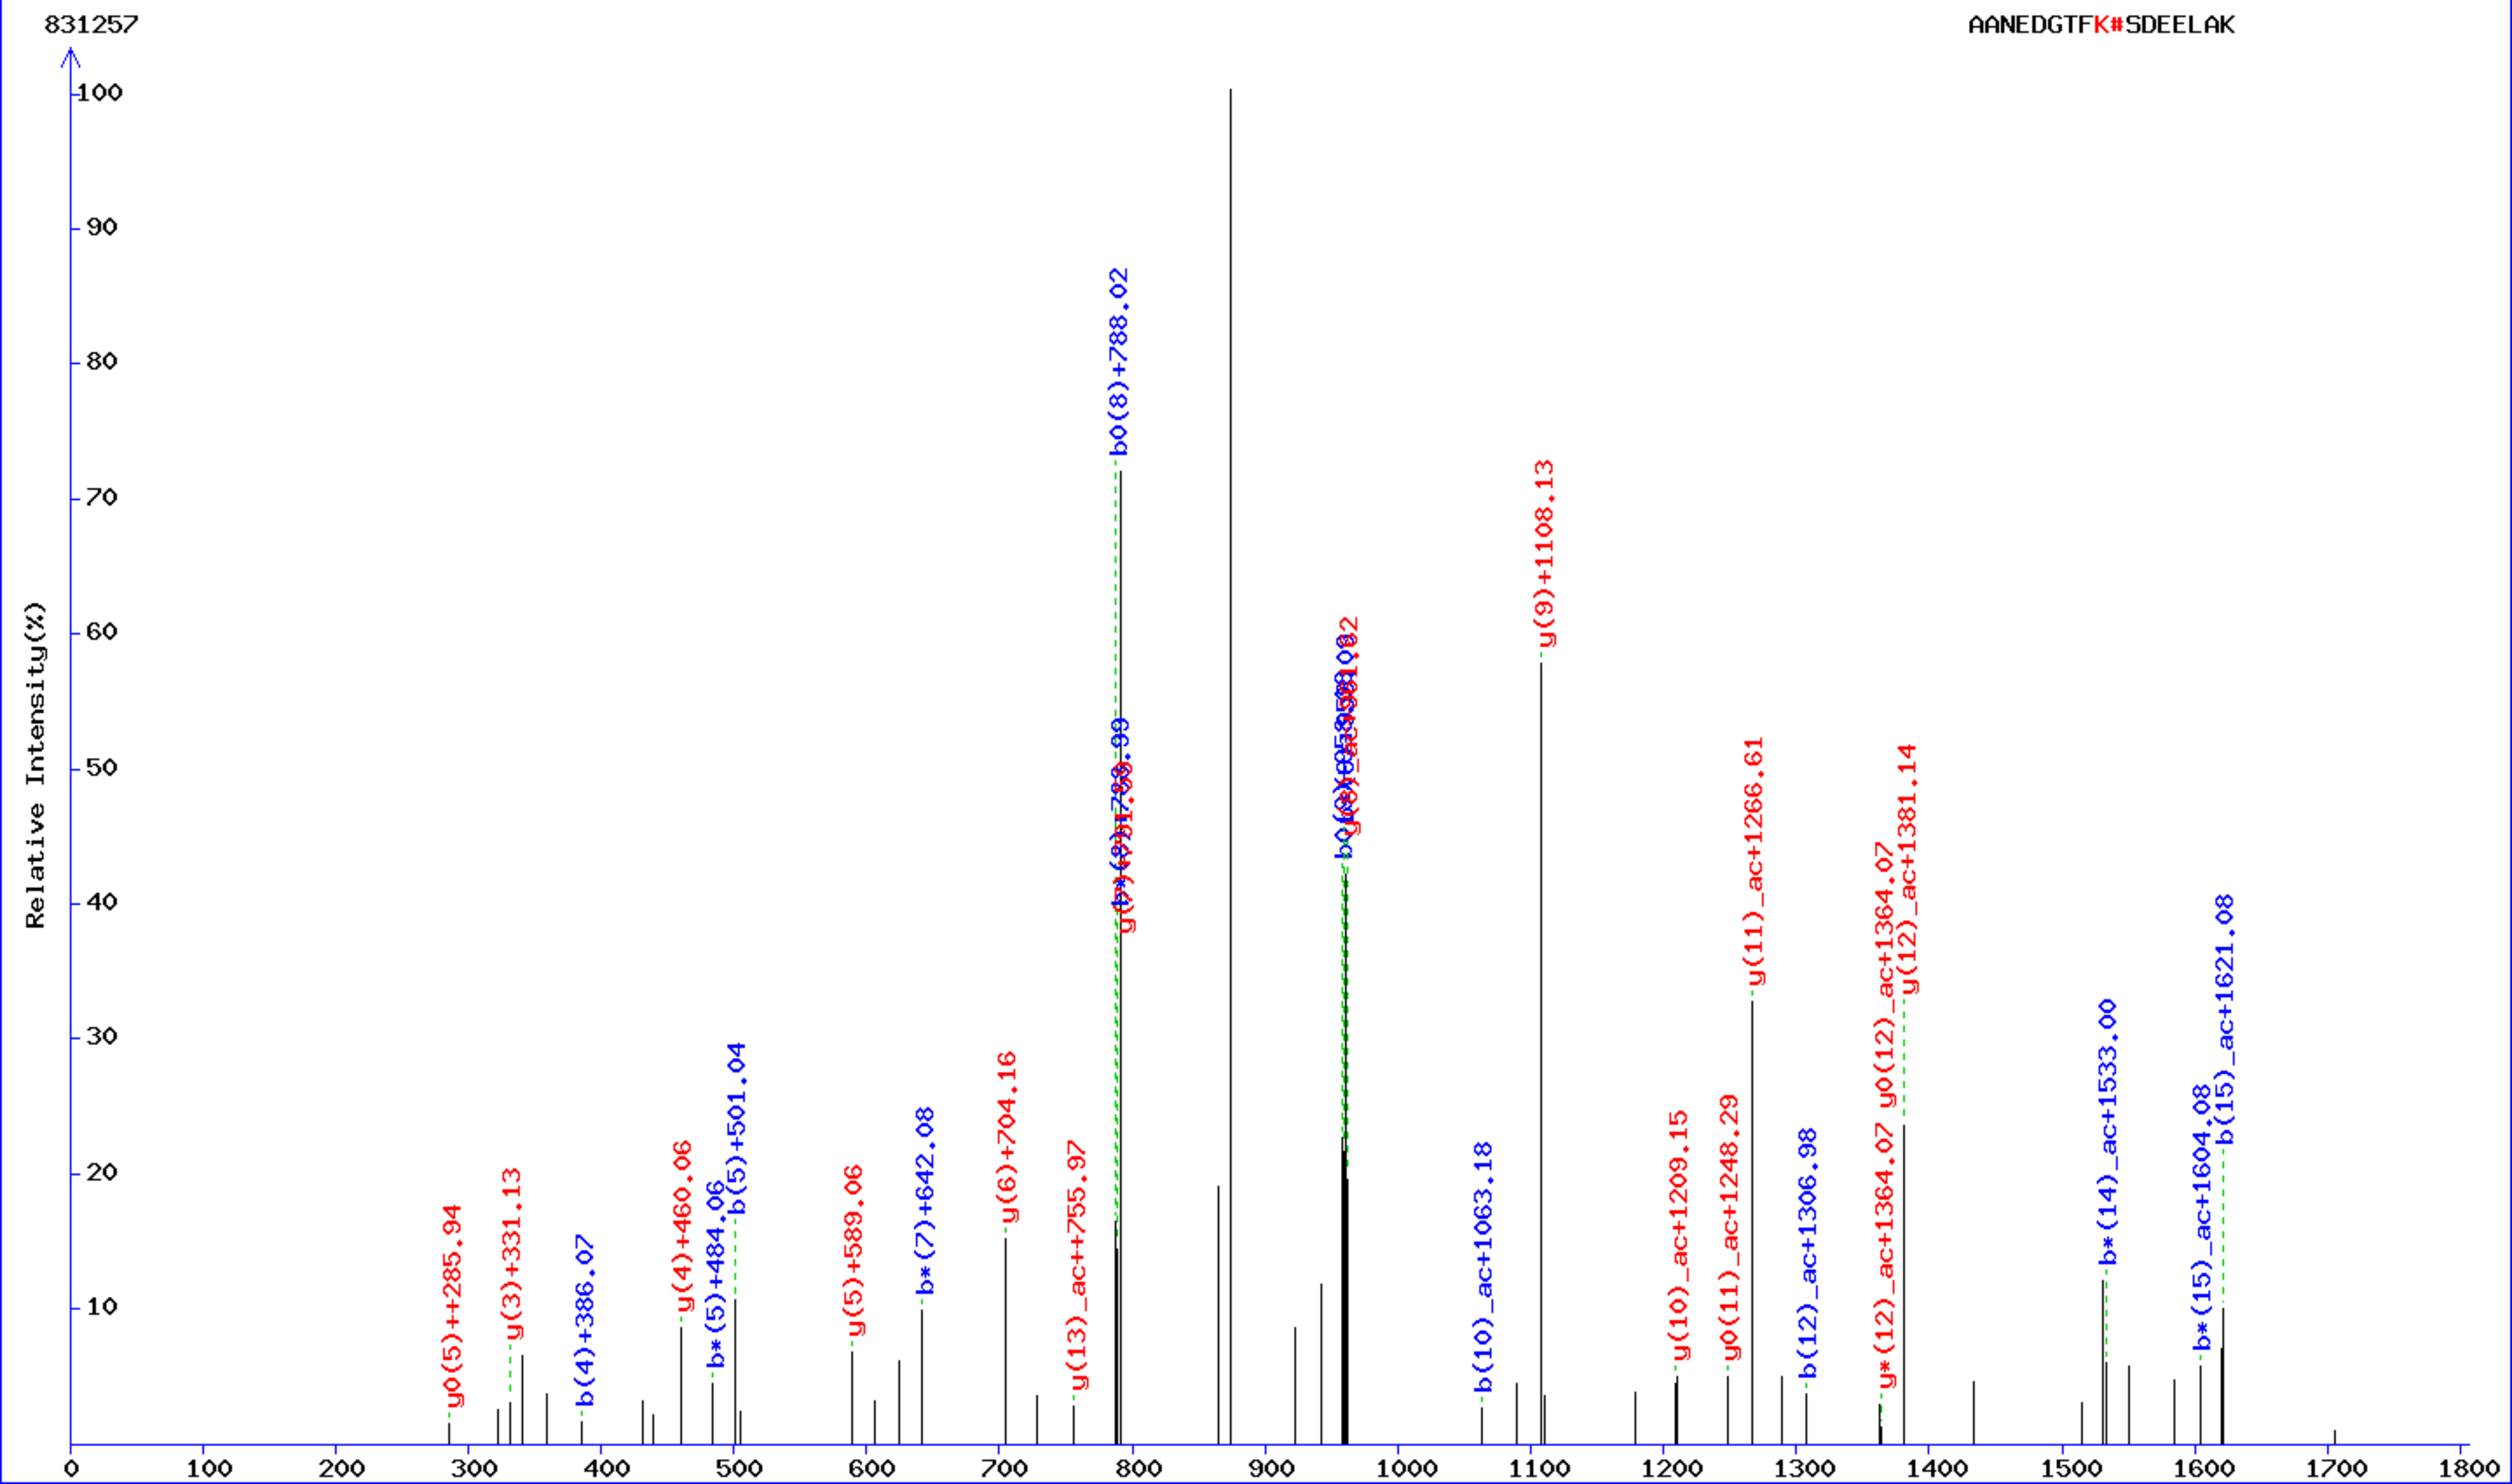

# gi|148662971 MRA\_3149 thiosulfate sulfurtransferase CysA3

AANEDGTFK#SDEELAK

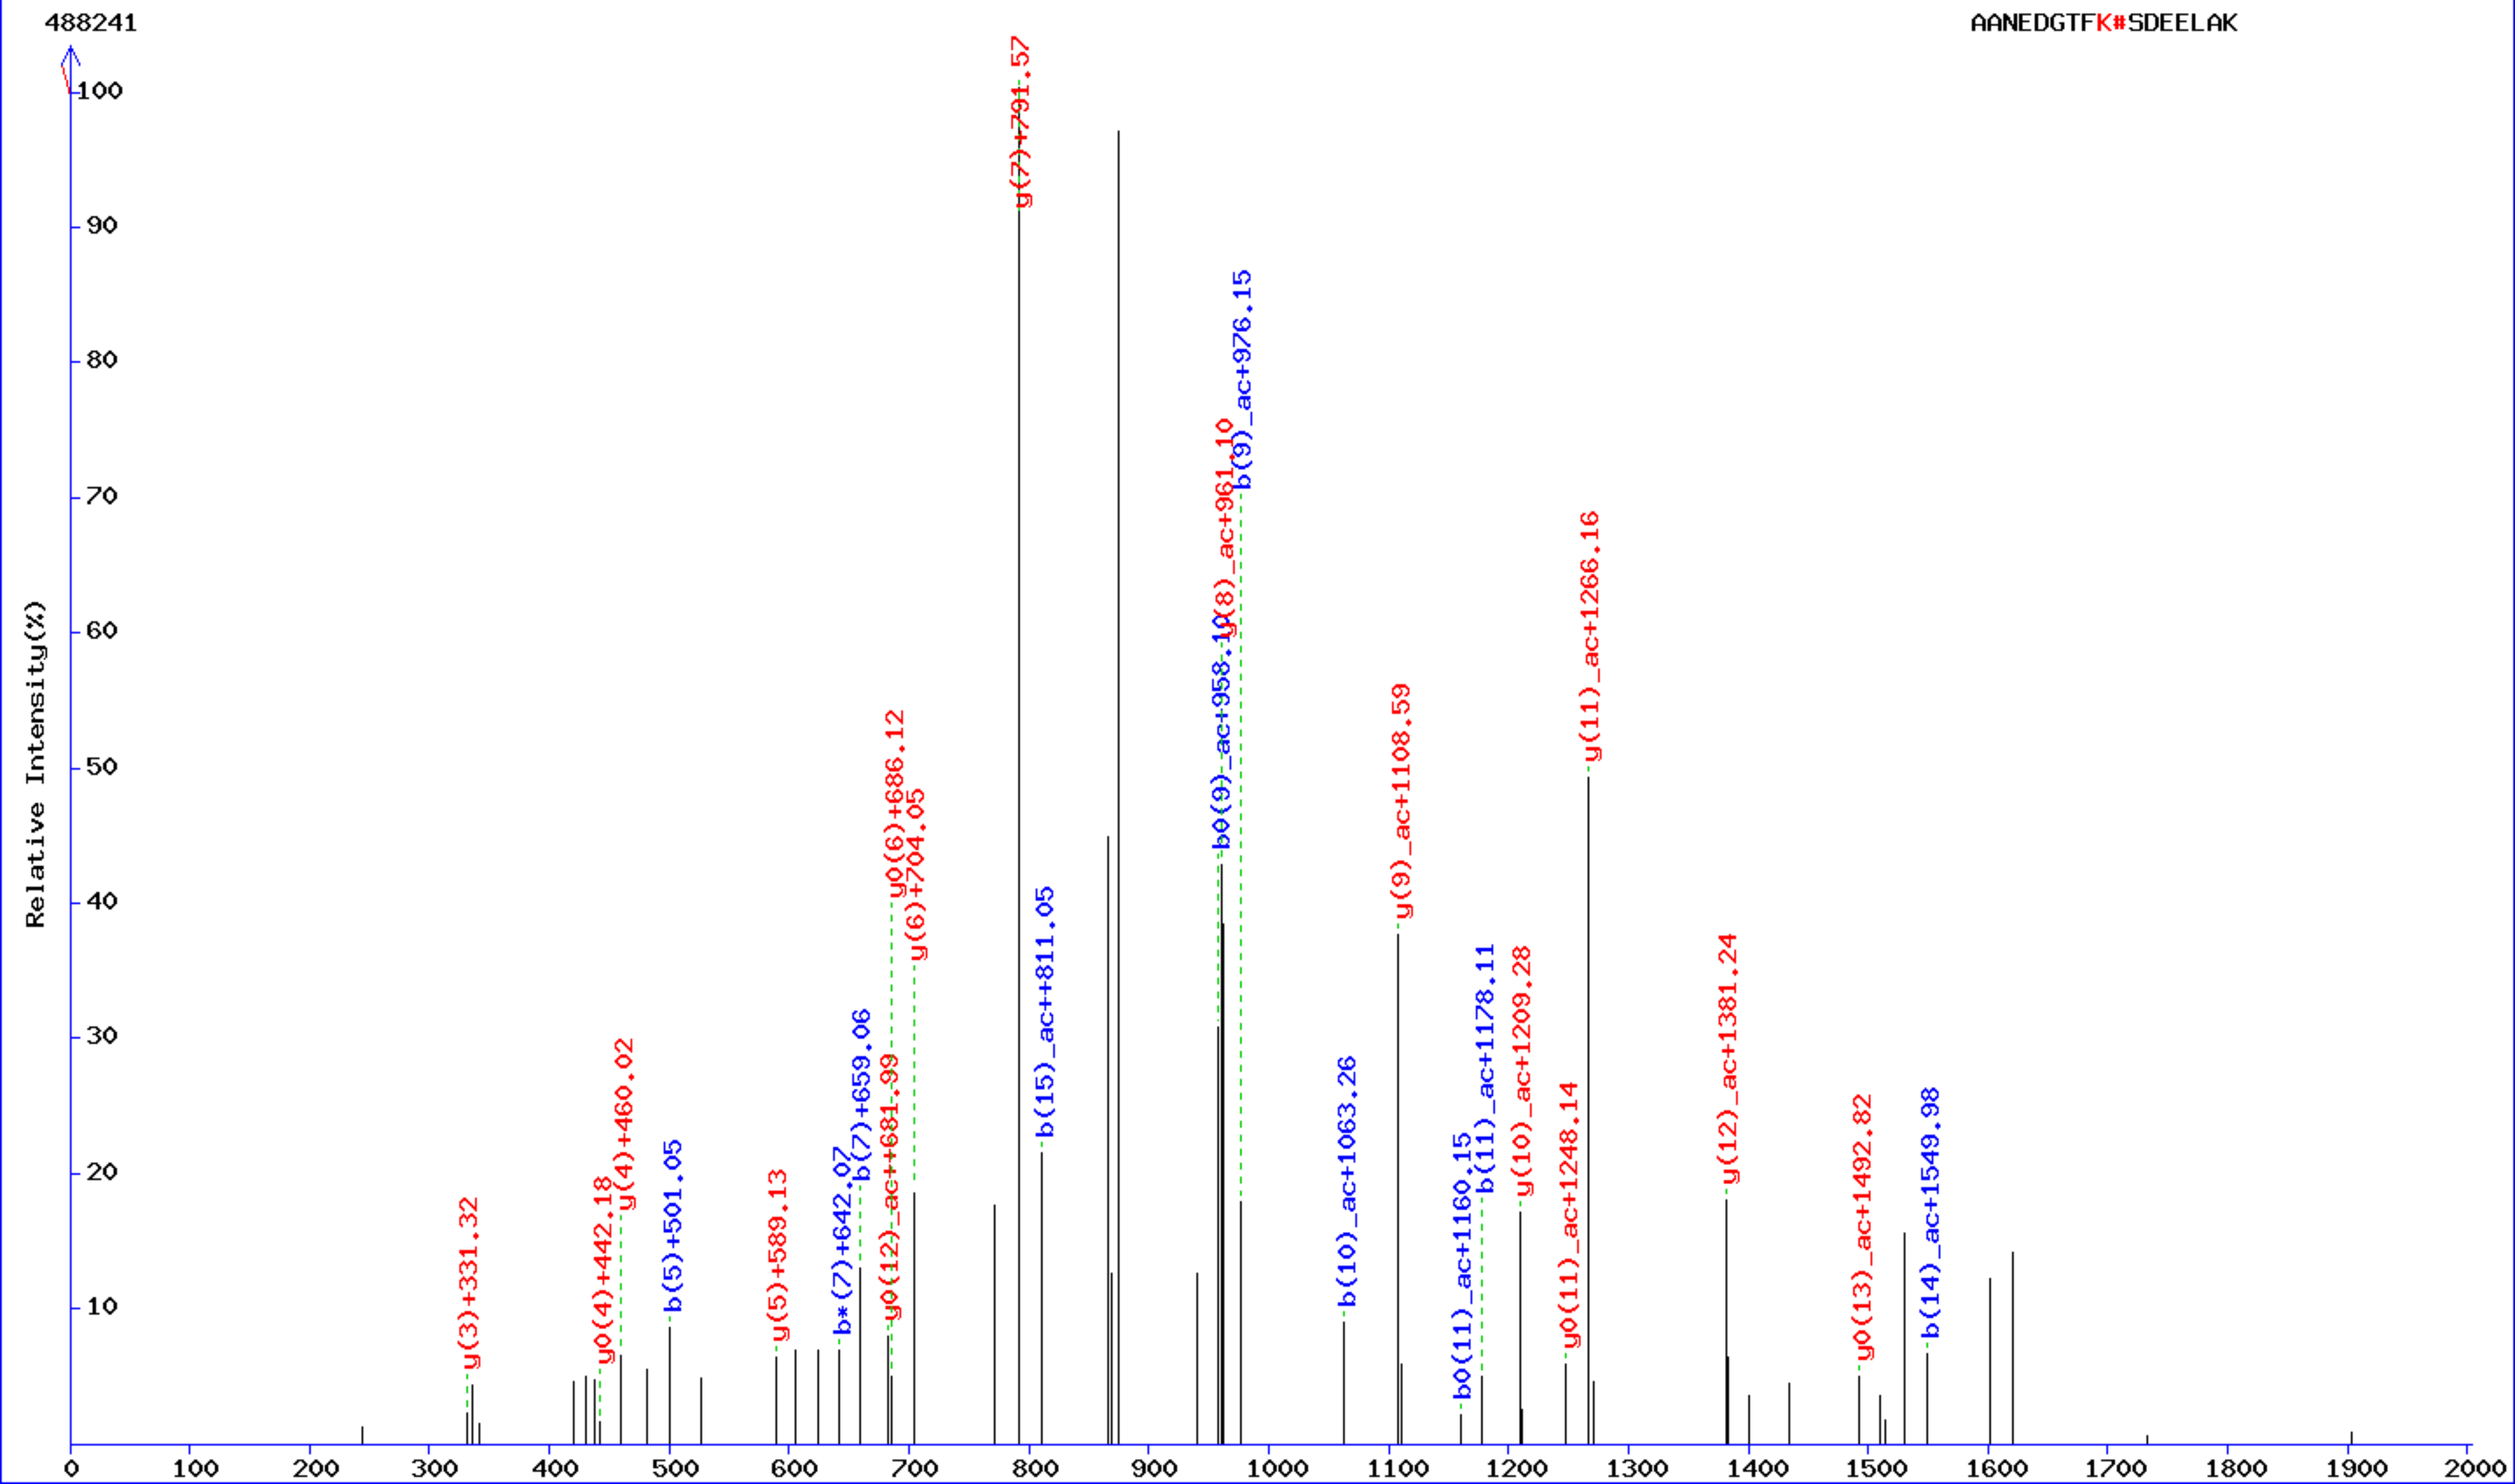

gi|148660731 MRA\_0959 succinyl-CoA synthetase subunit alpha

KAGTTVTHEDK#GGR

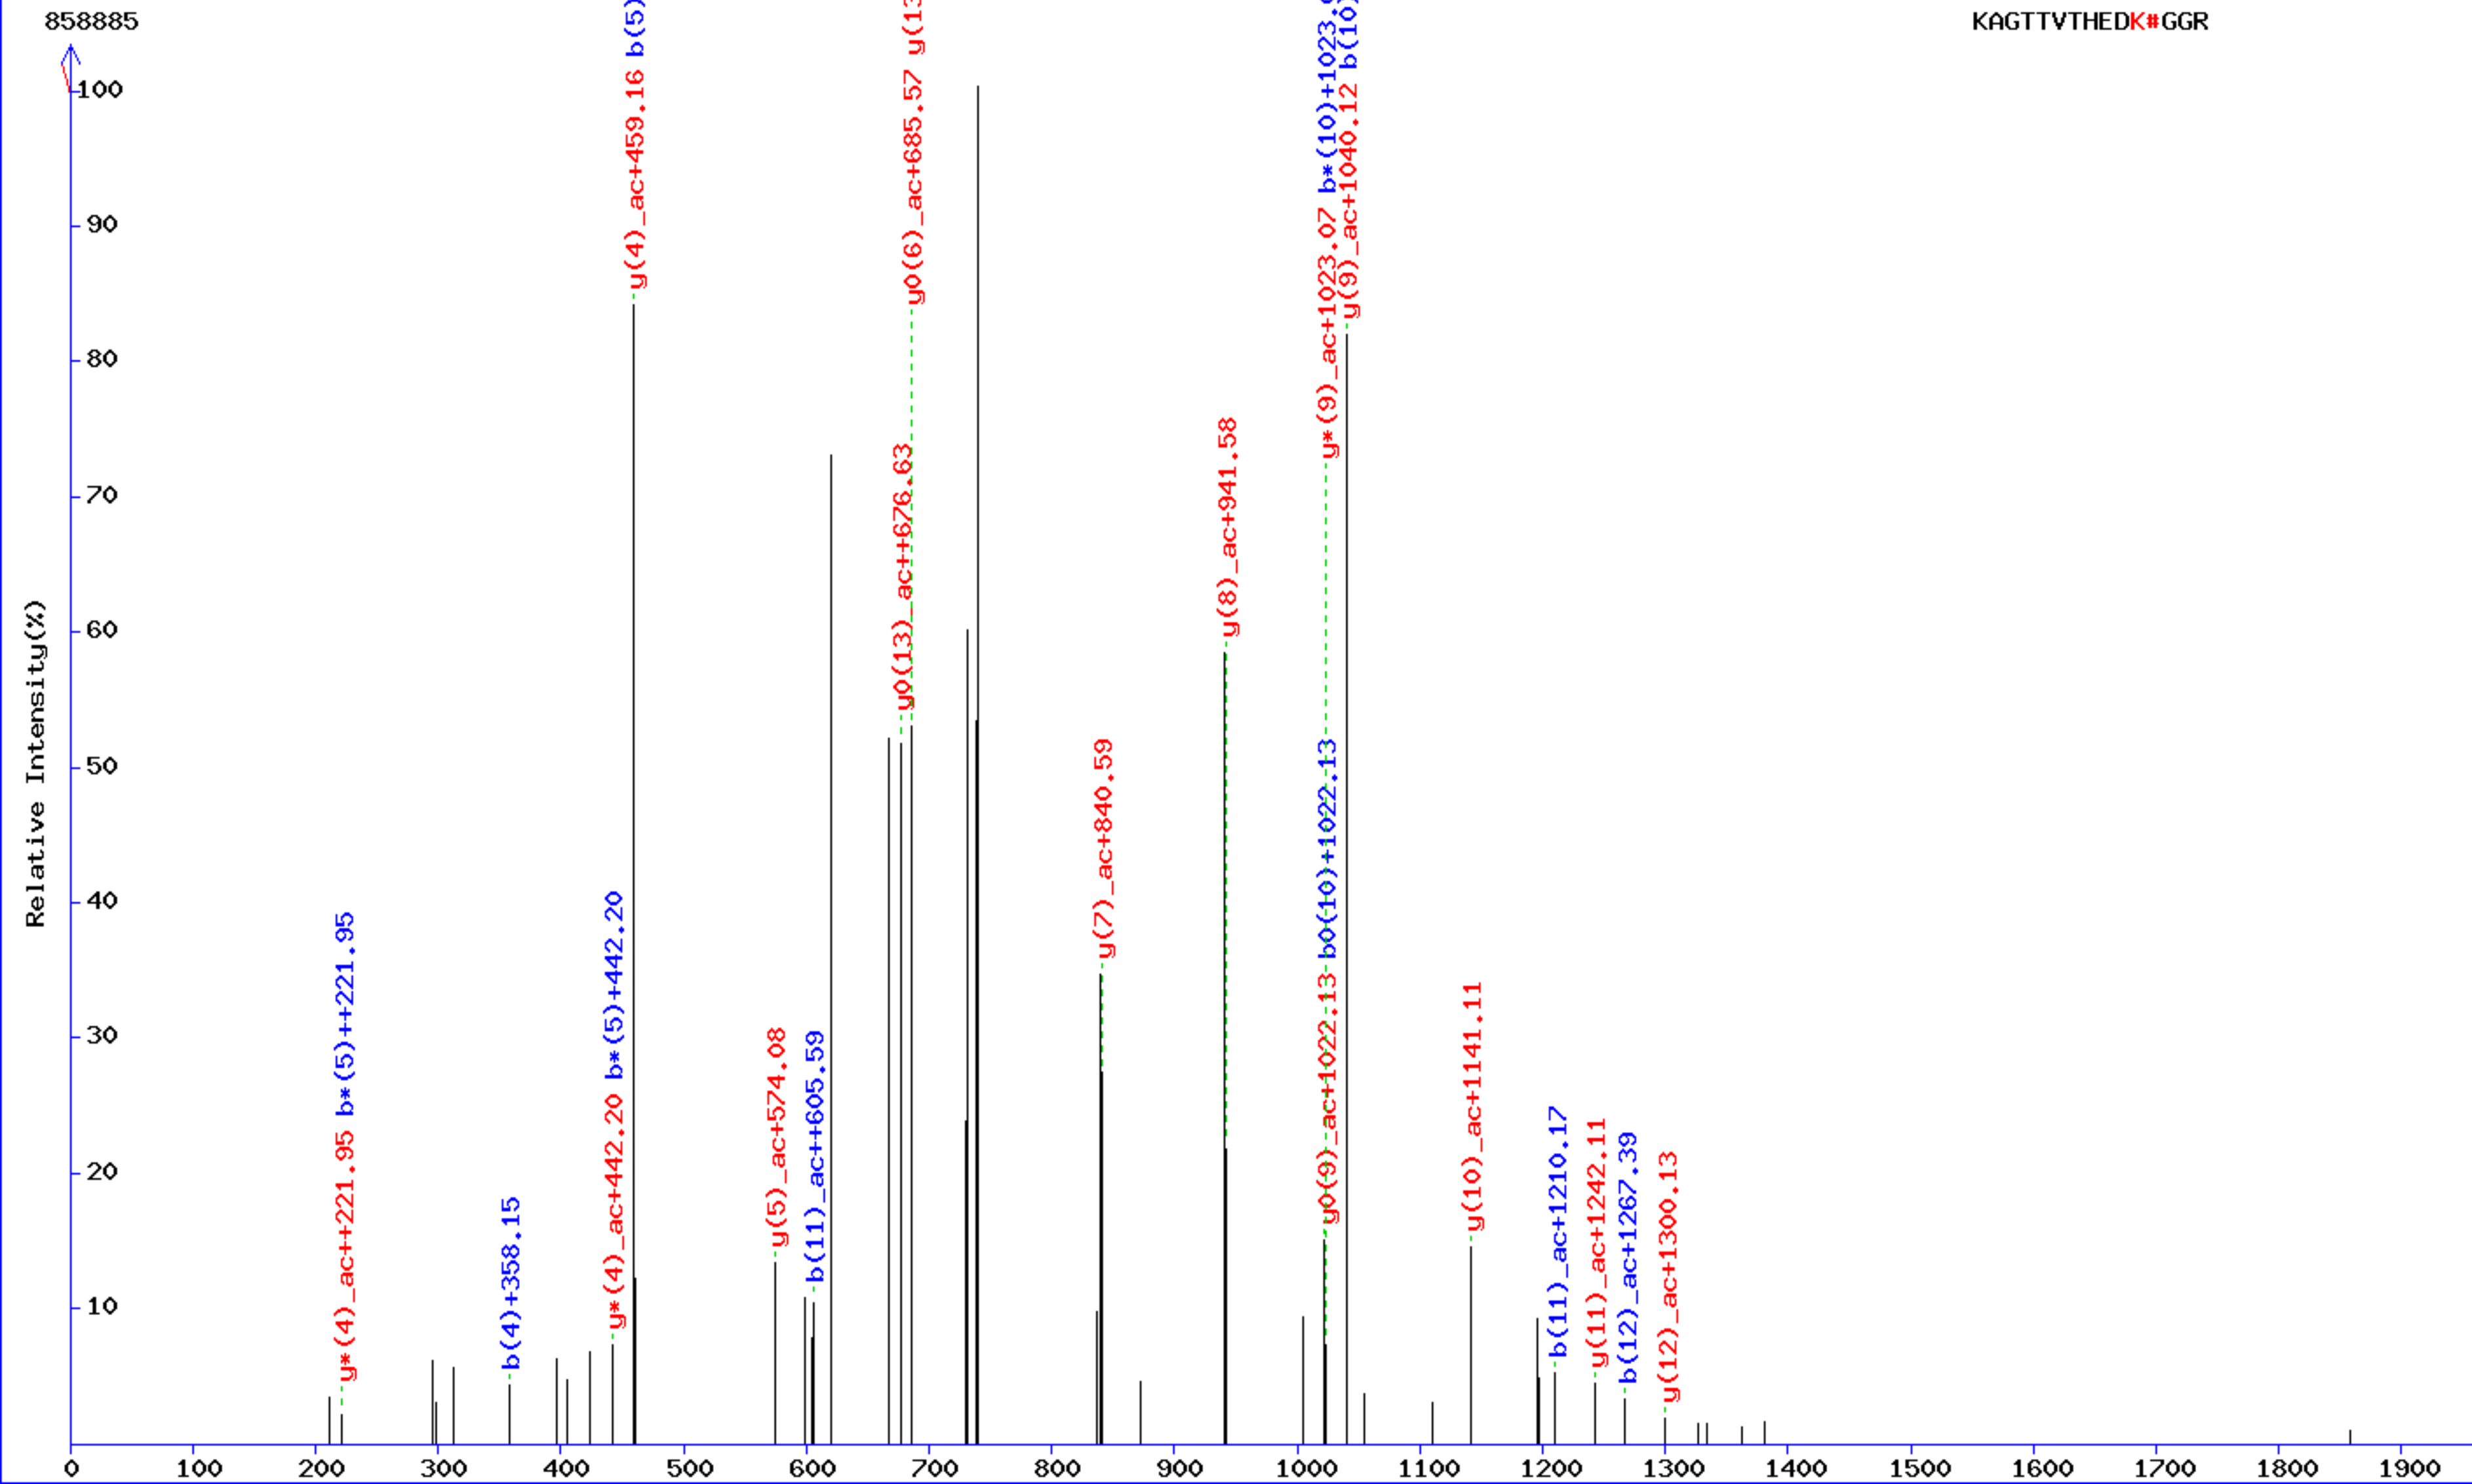

# gi|148660731 MRA\_0959 succinyl-CoA synthetase subunit alpha

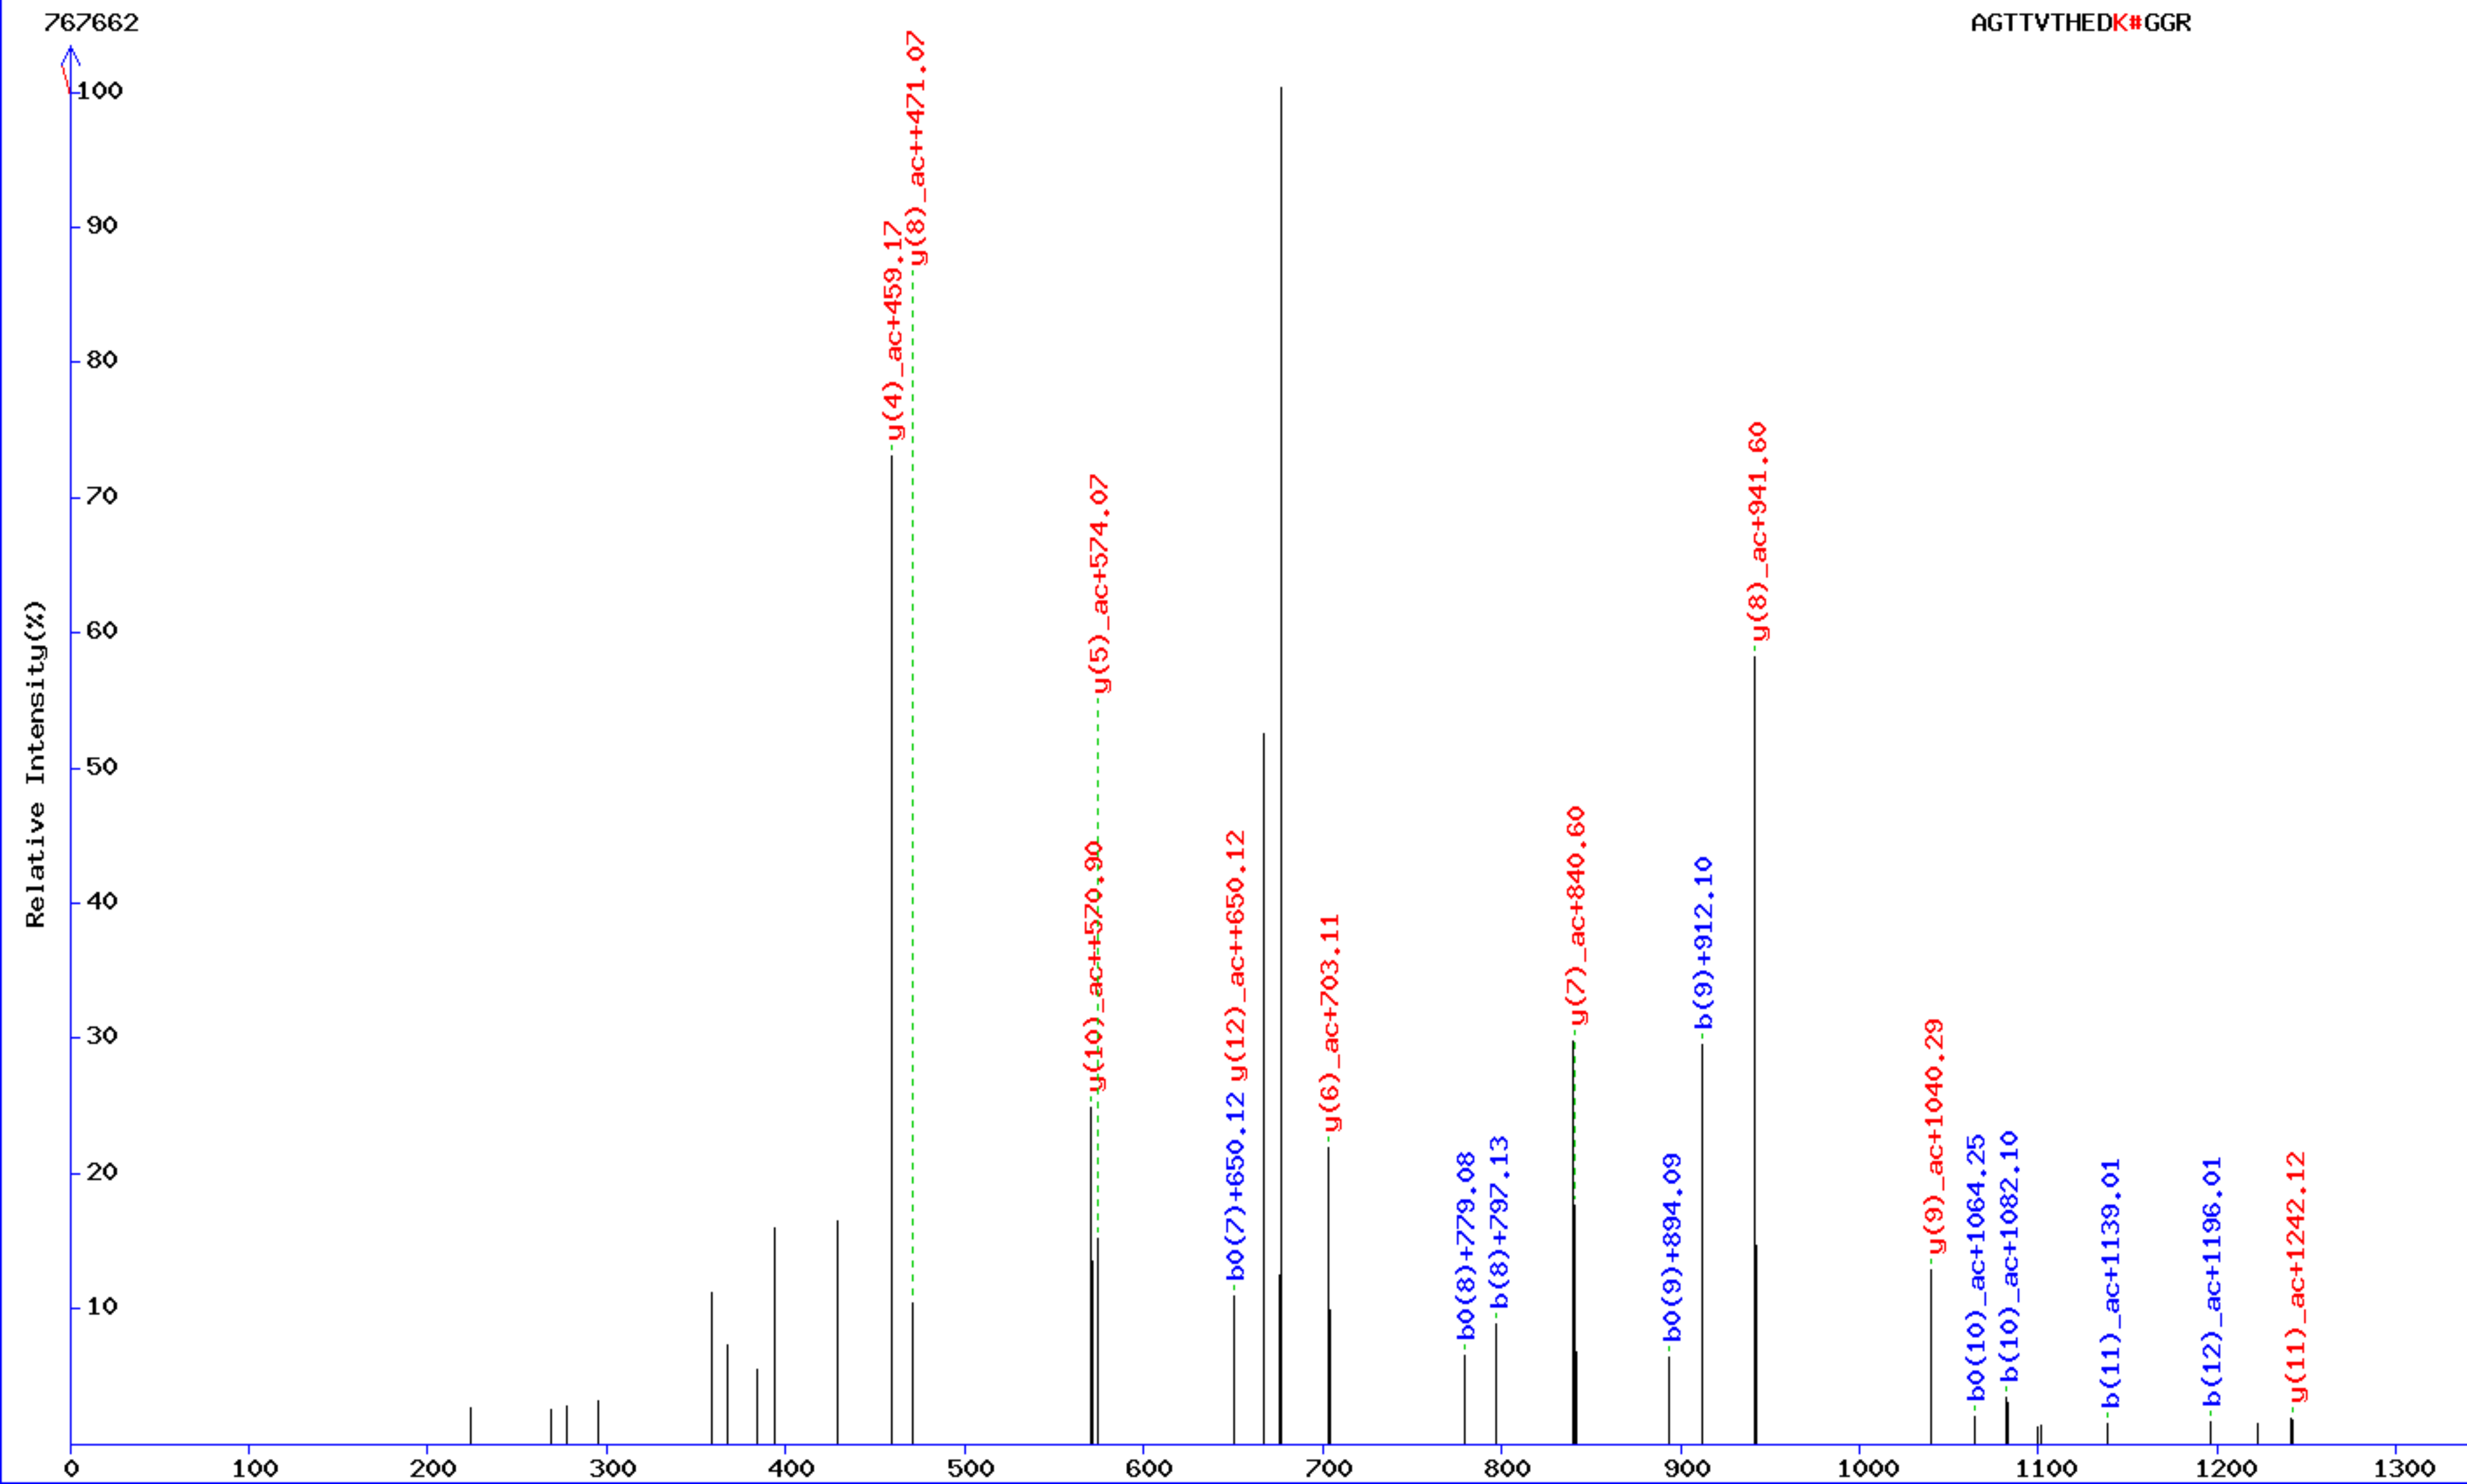

gi|148660426 MRA\_0663 50S ribosomal protein L7/L12

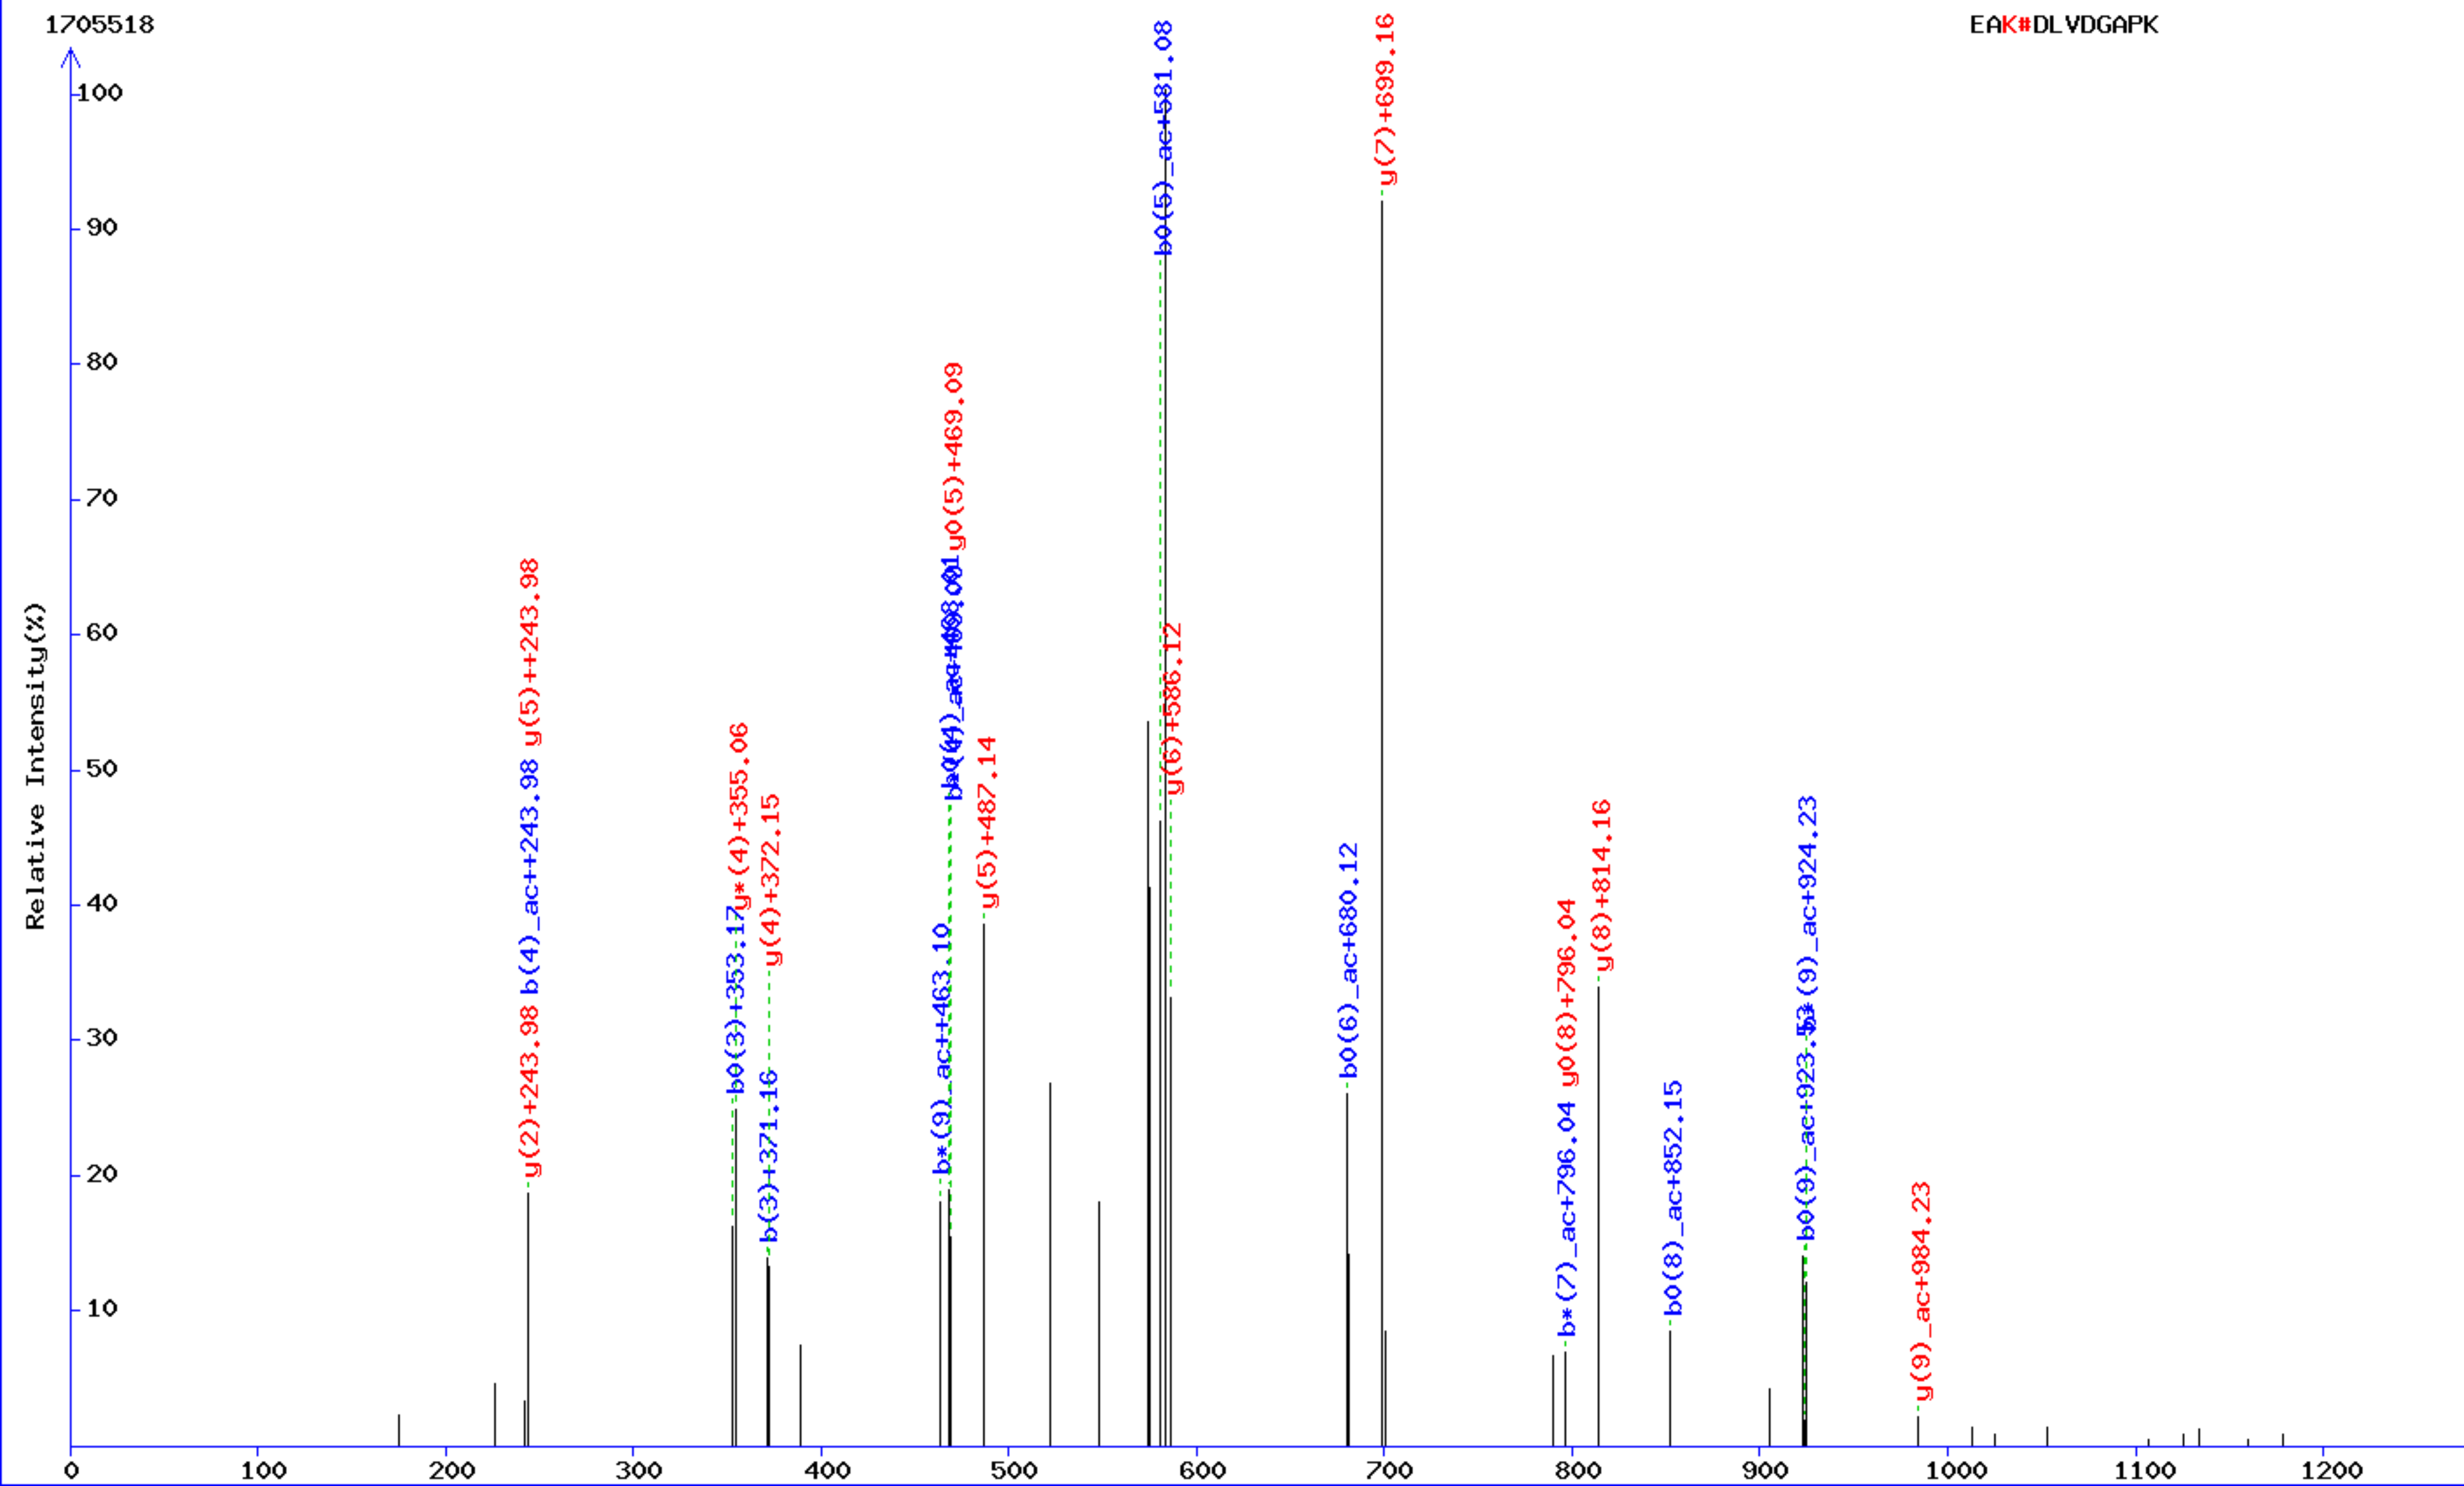

gi|148660731 MRA\_0959 succinyl-CoA synthetase subunit alpha

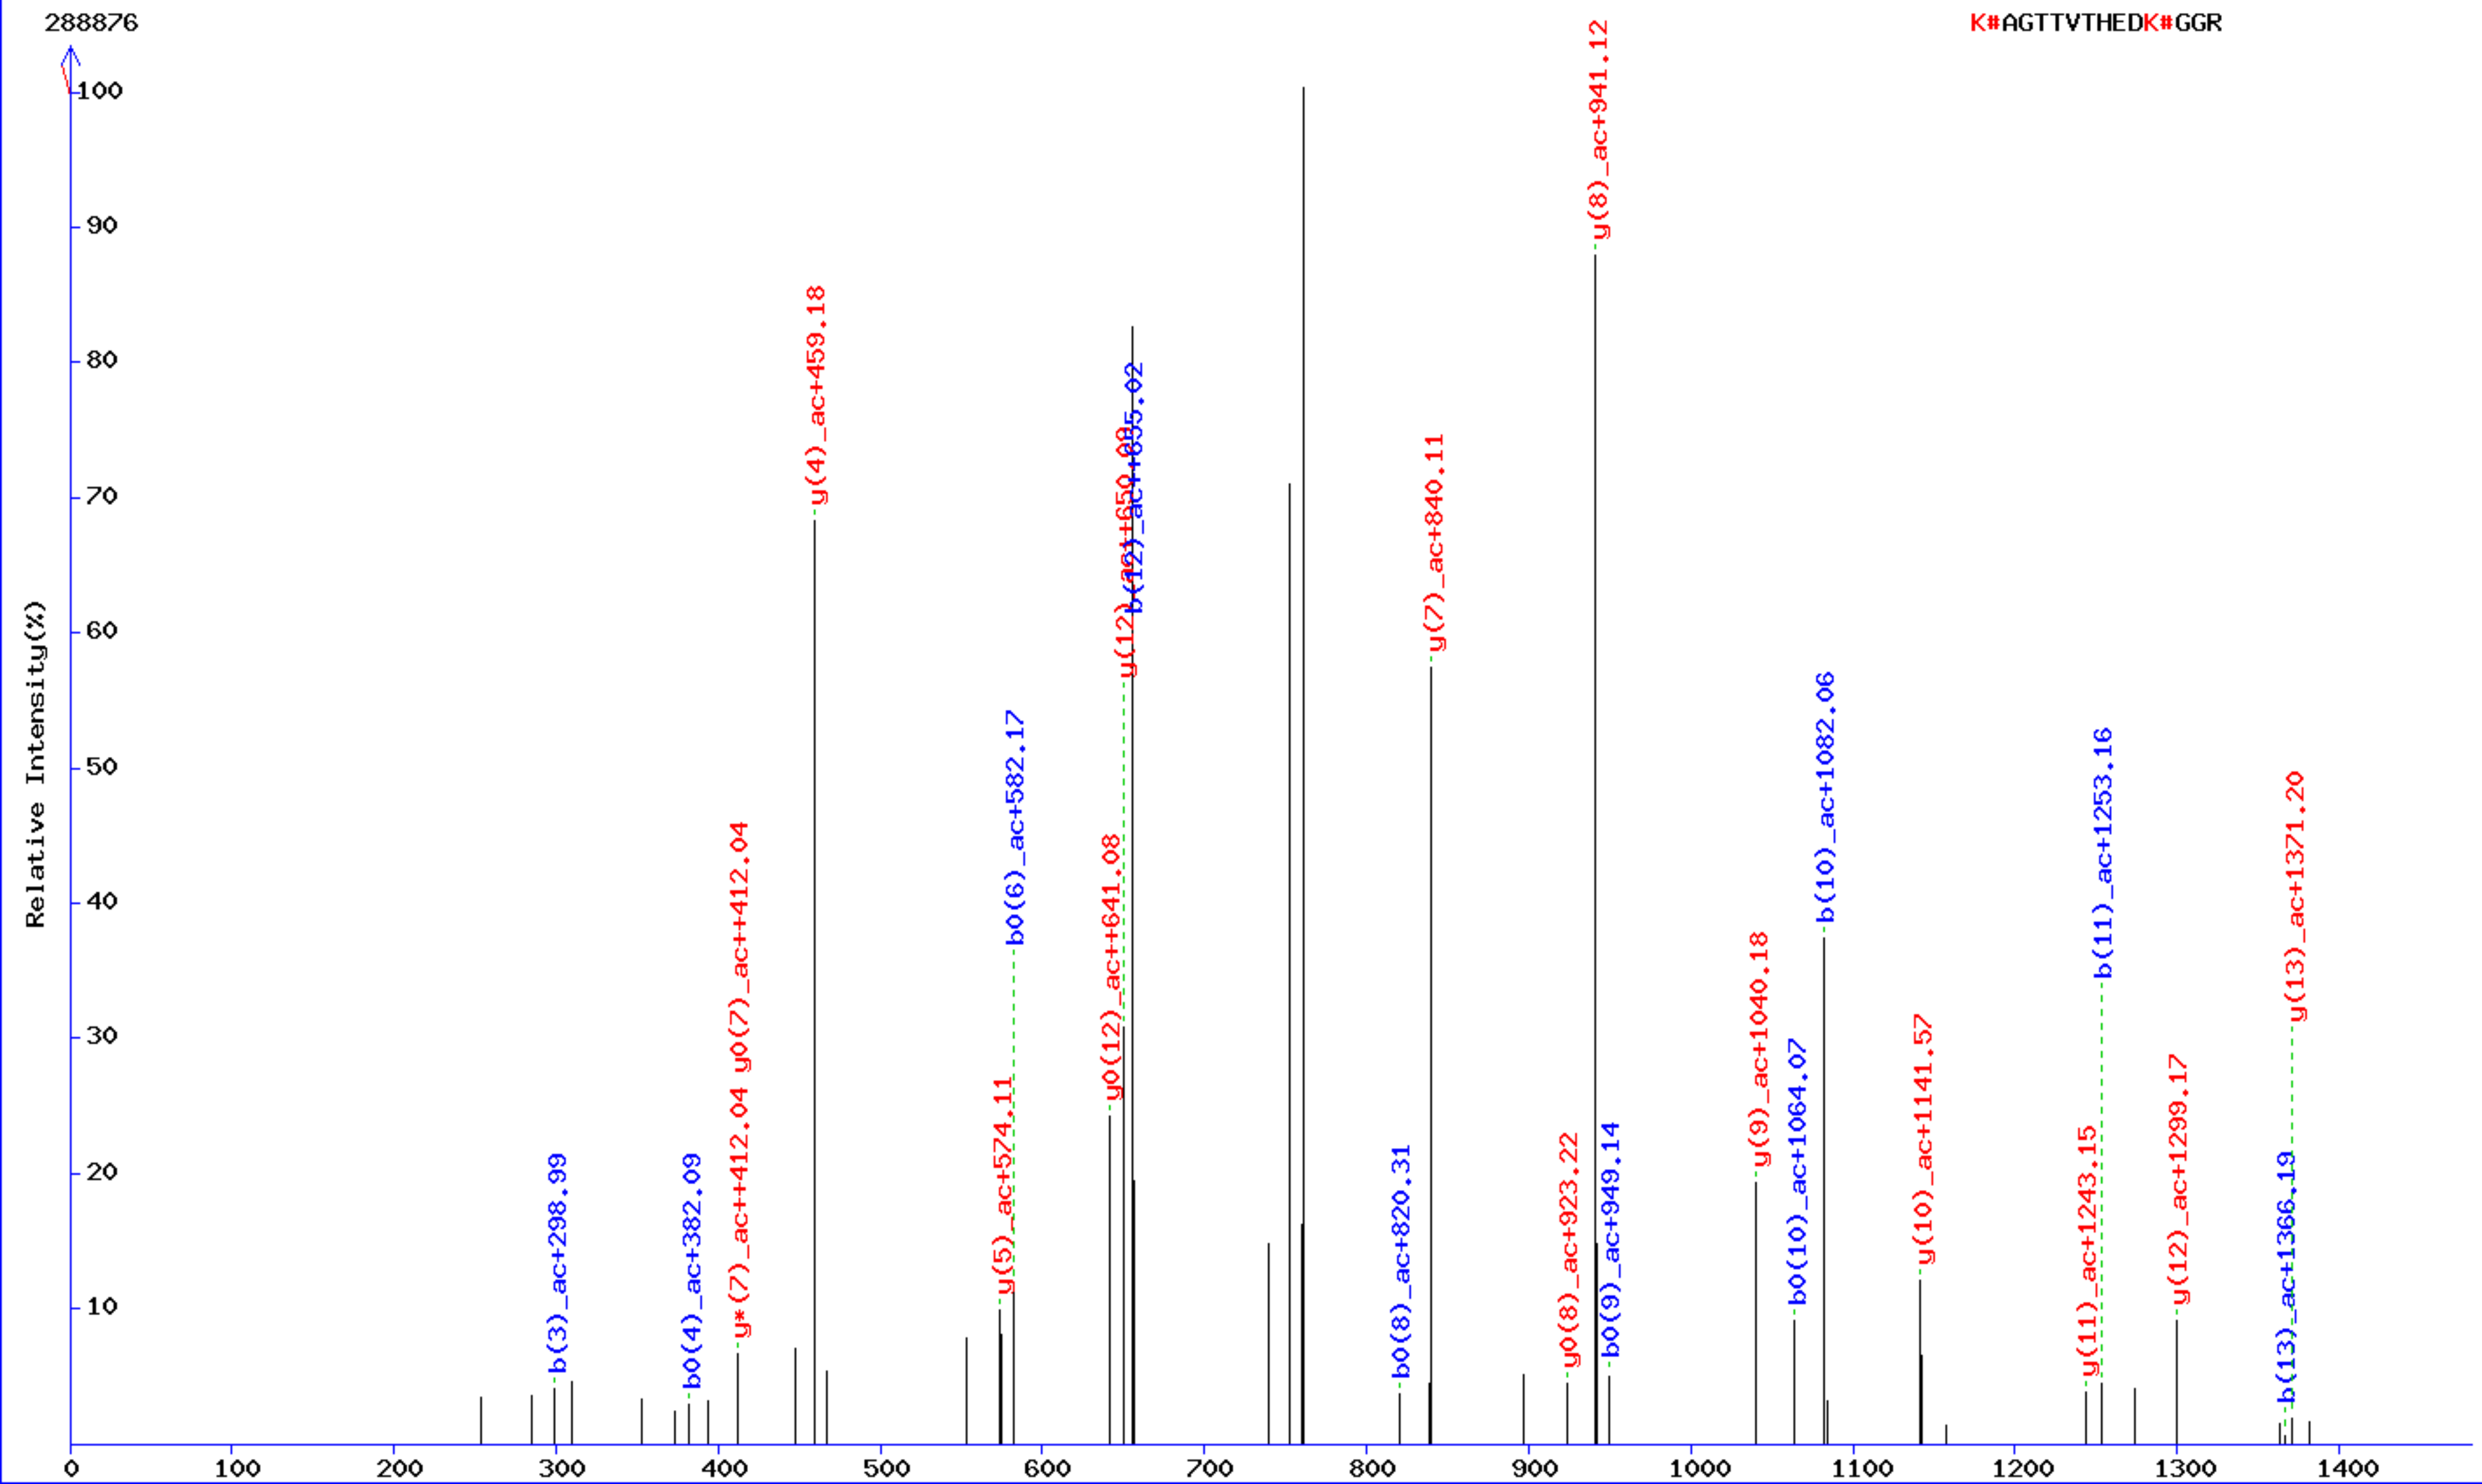

# gi|148662295 MRA\_2486 ATP-dependent Clp protease proteolytic subunit

DTDRD**K**ILTAEAK

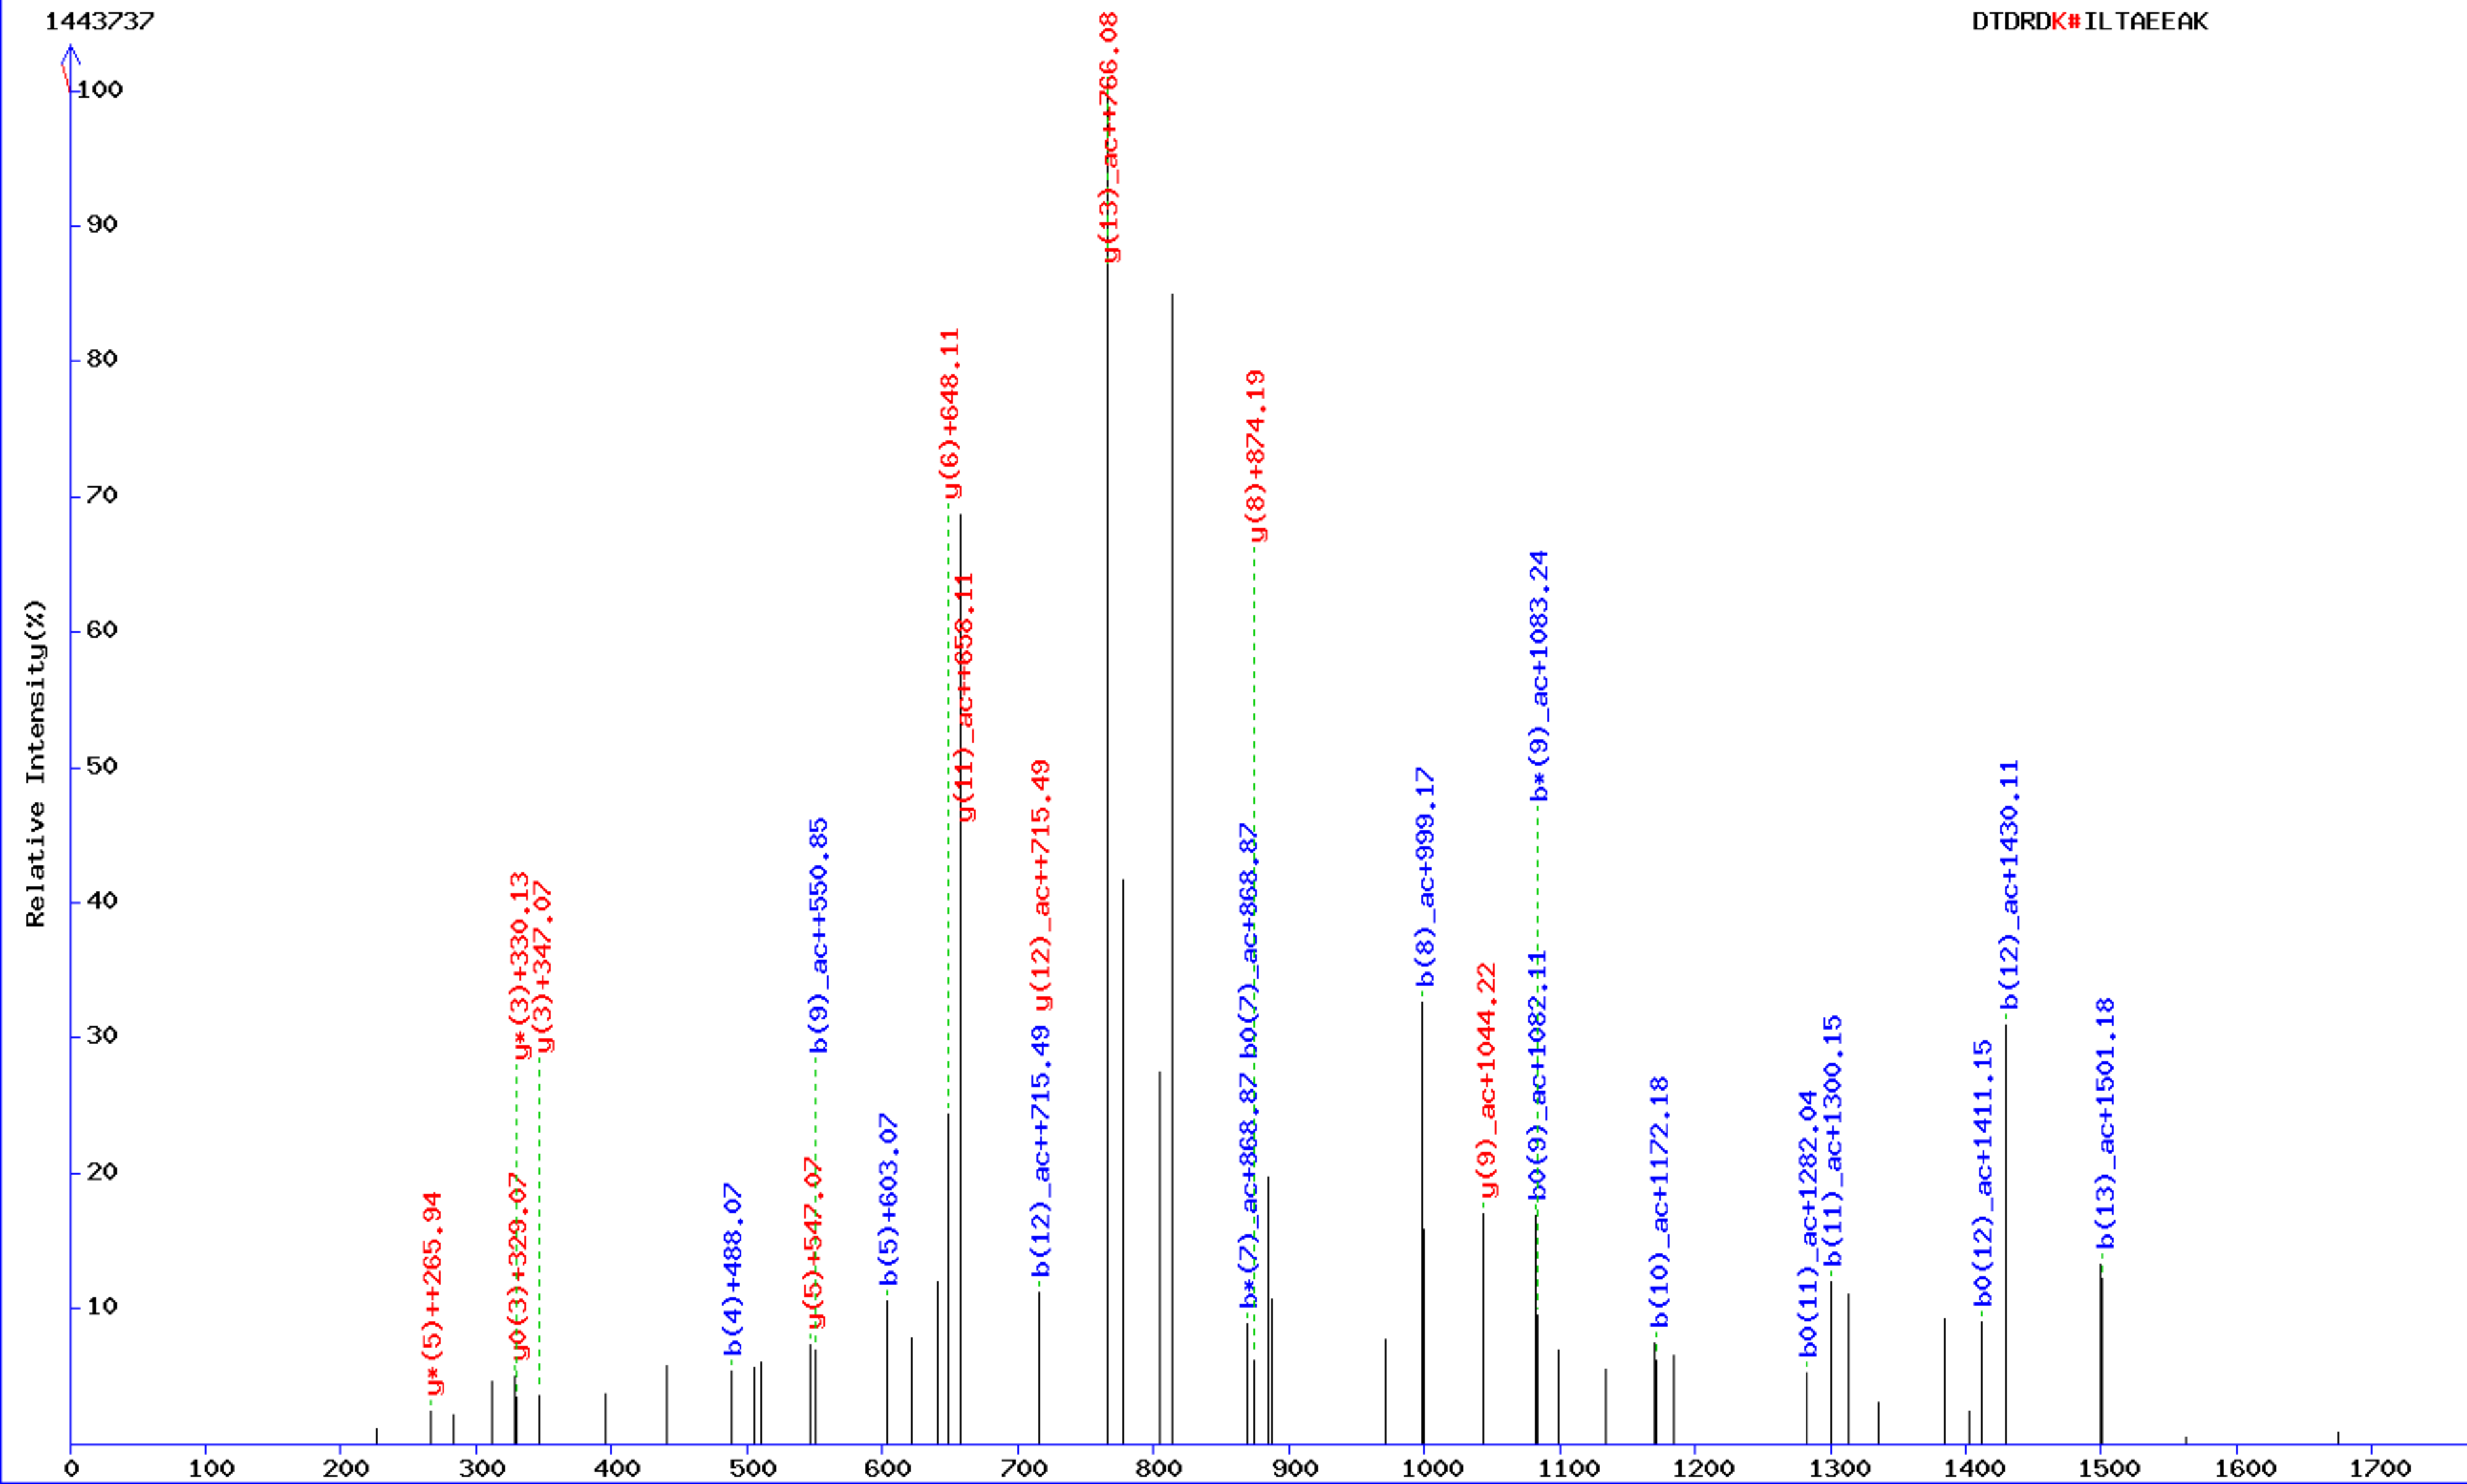

# gi|148659826 MRA\_0068 isocitrate dehydrogenase (NADP) Icd2

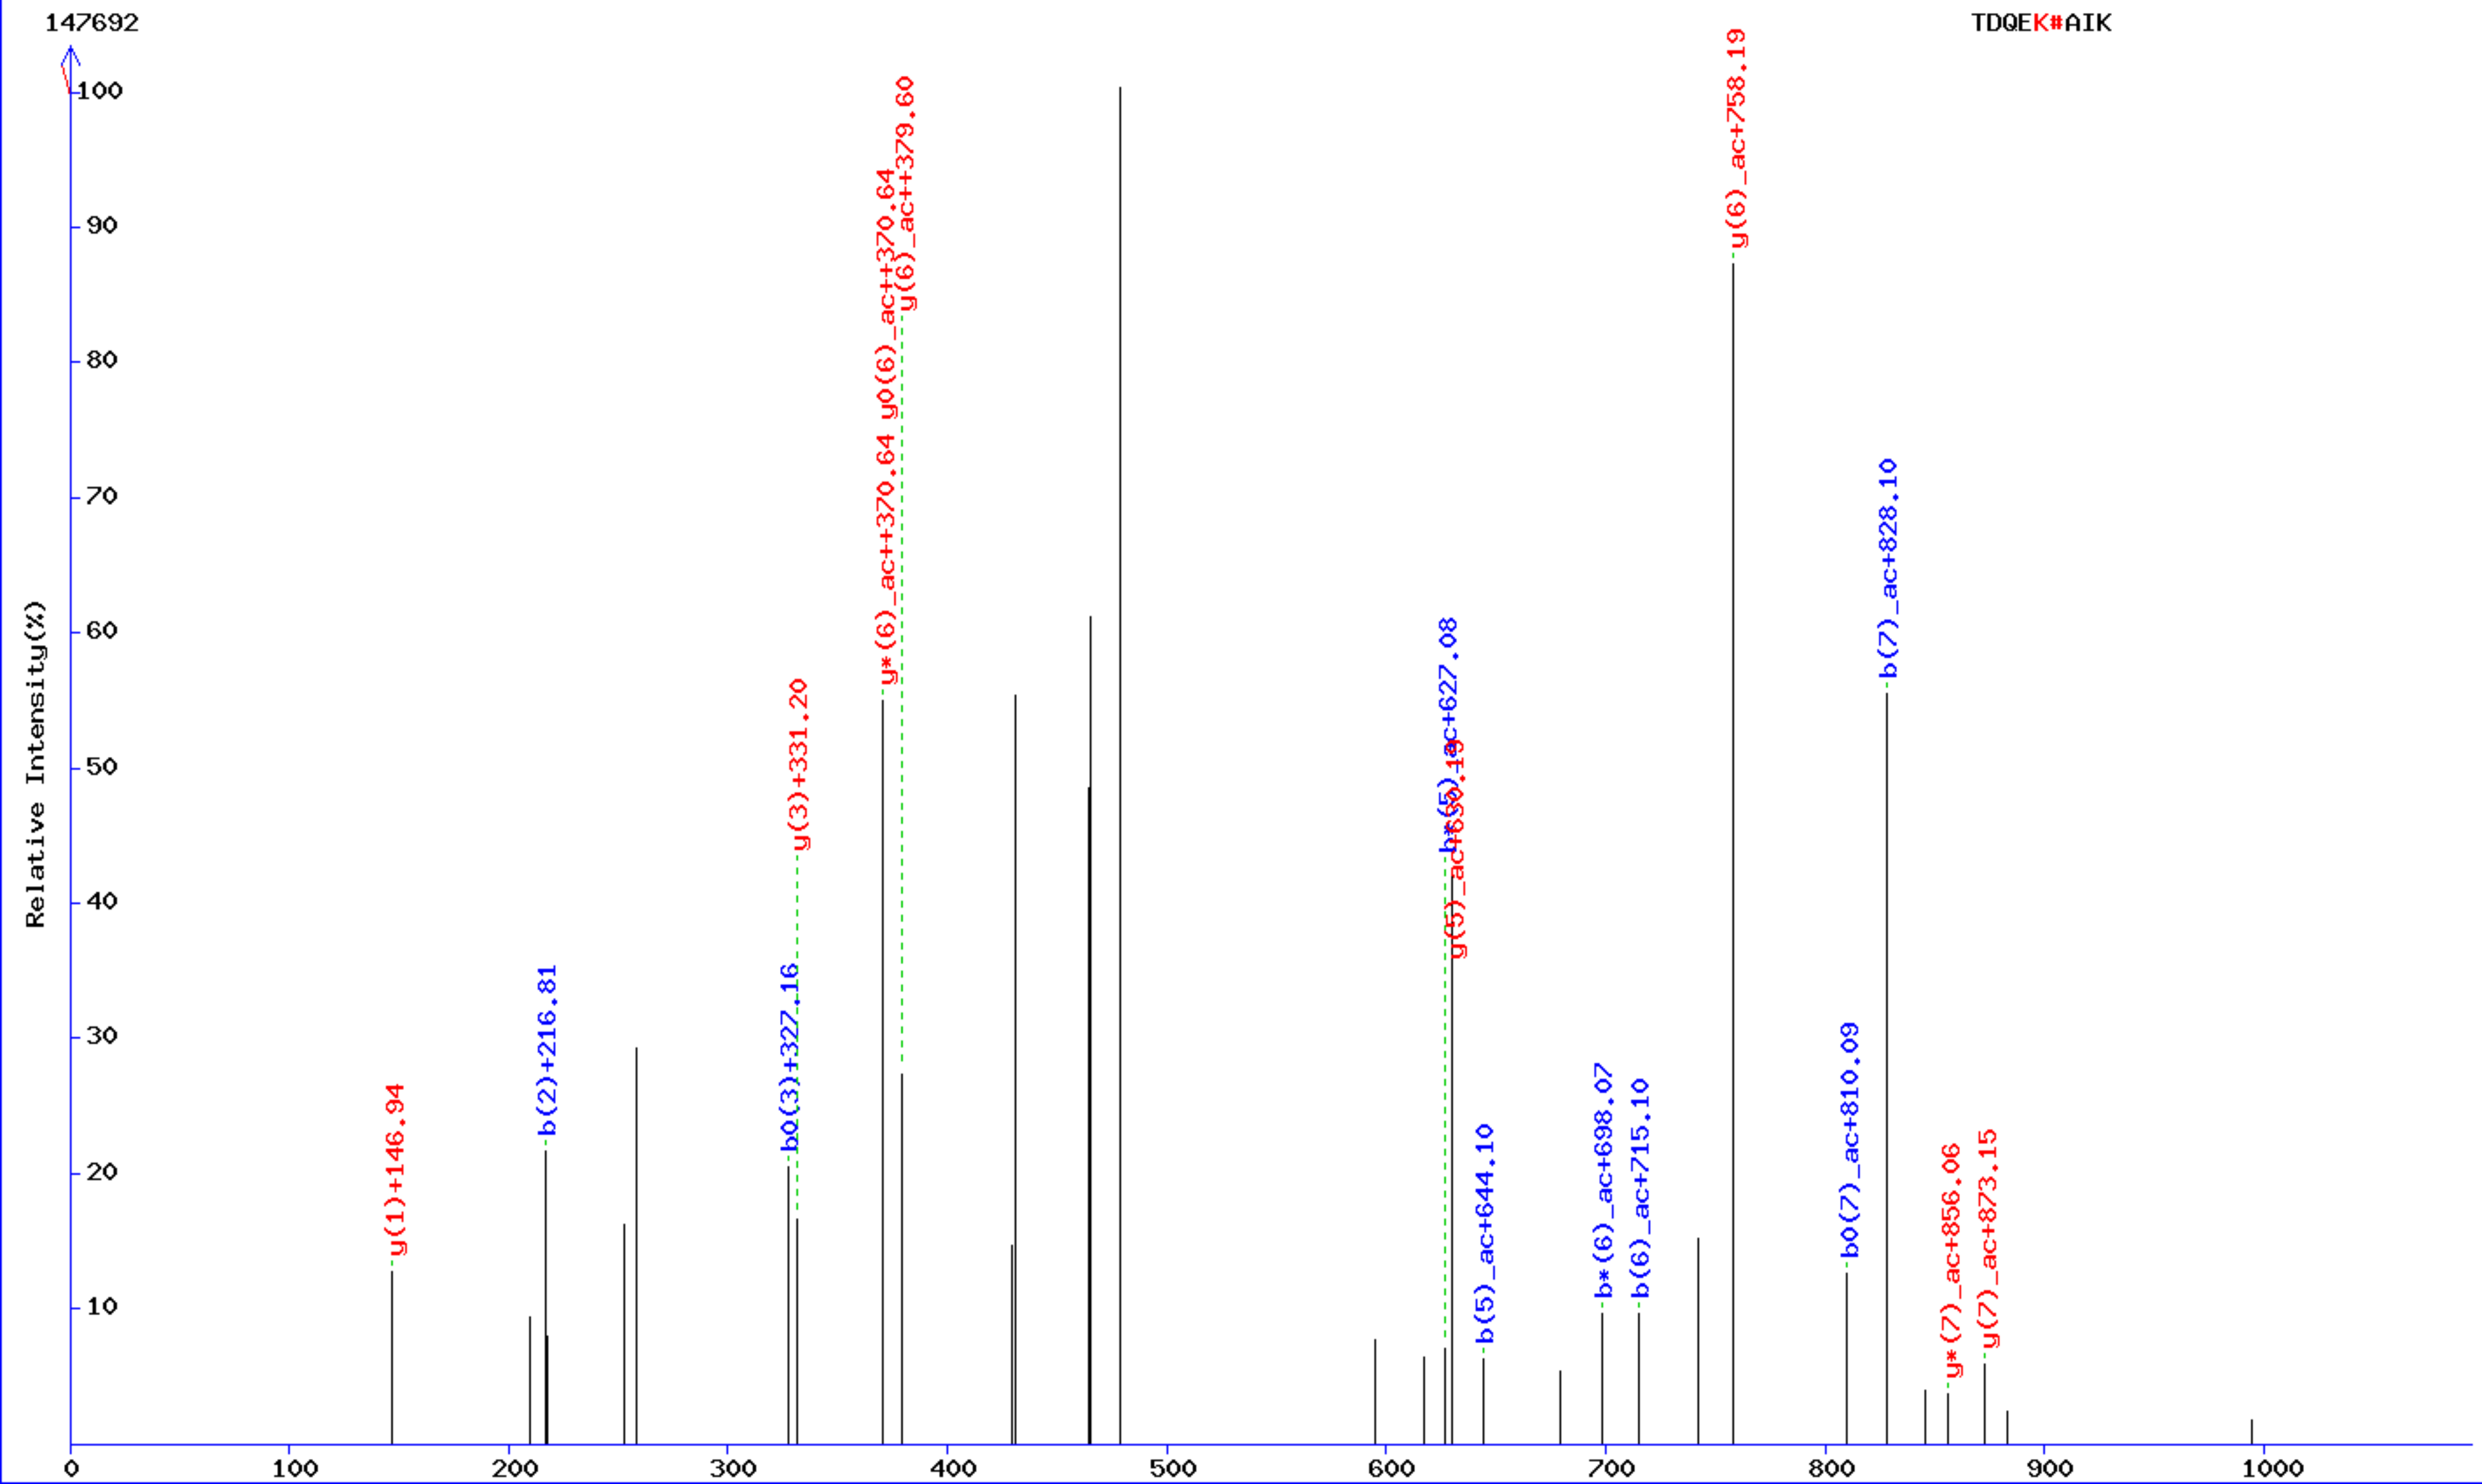

TDQEK#AIK



# gi|148660116 MRA\_0359 molecular chaperone DnaK

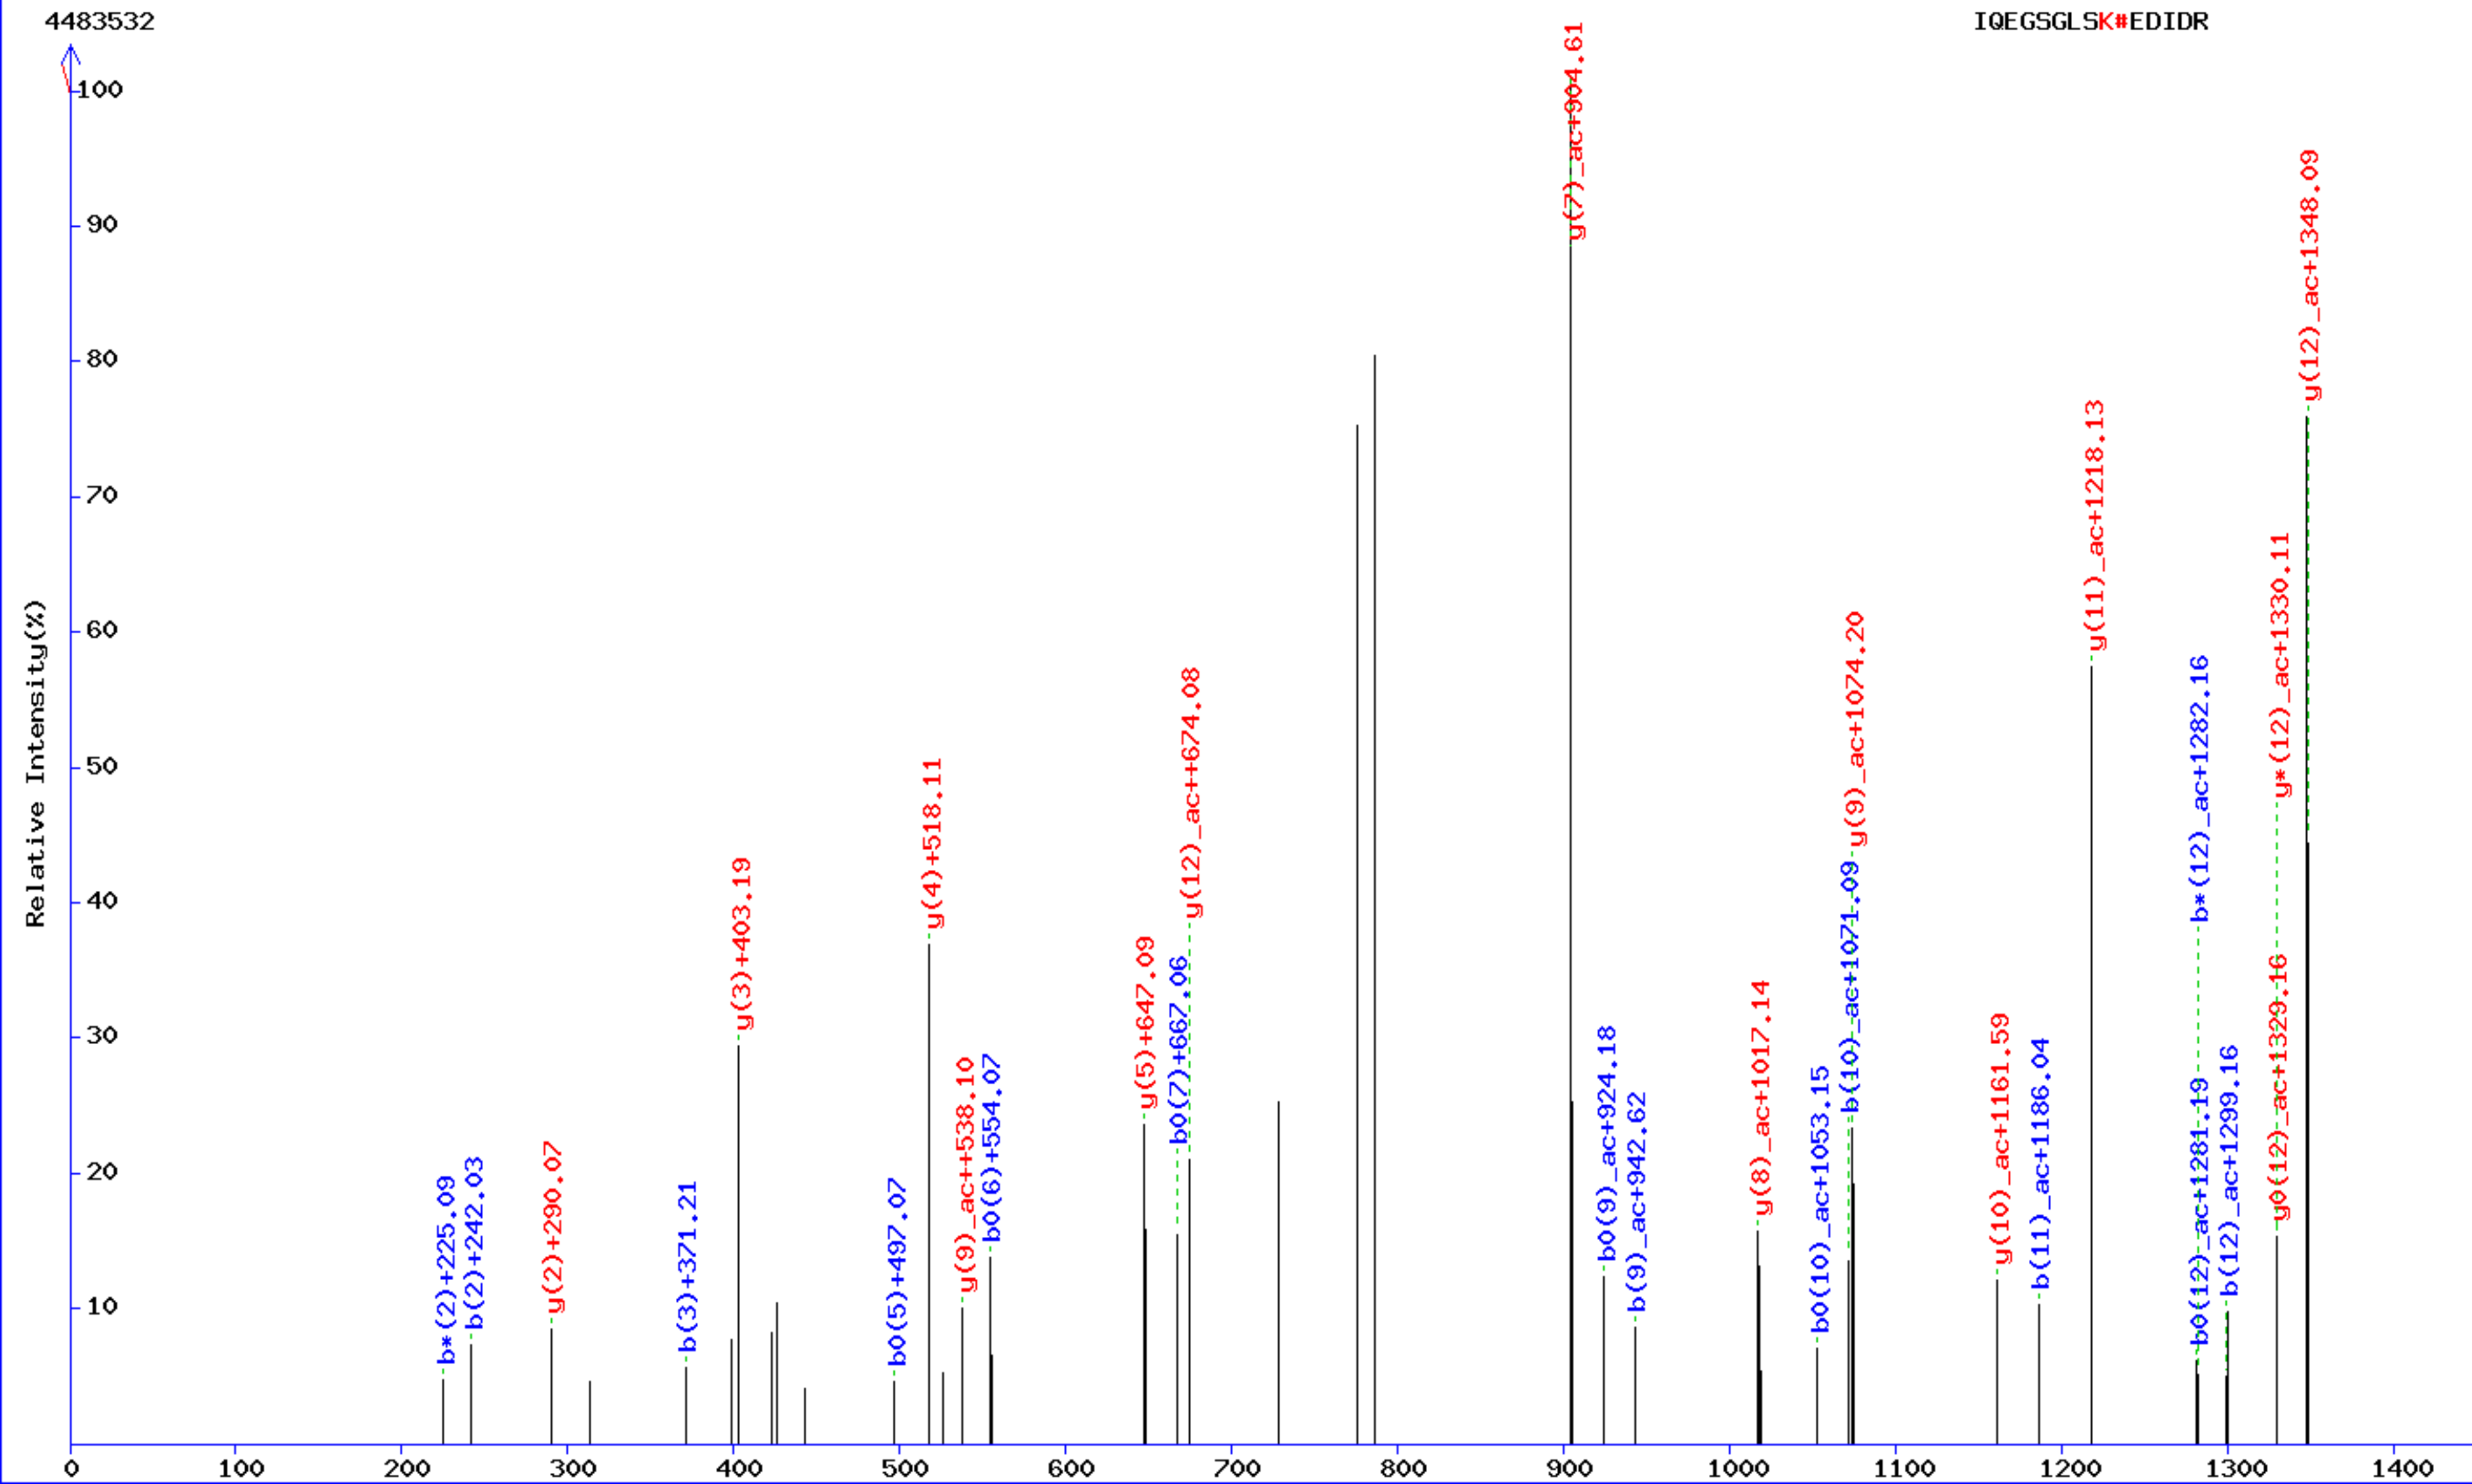

IQEGSGLSK#EDIDR

# gi|148660637 MRA\_0868 fatty oxidation complex subunit alpha

ANPDGAGVQPWDK#K

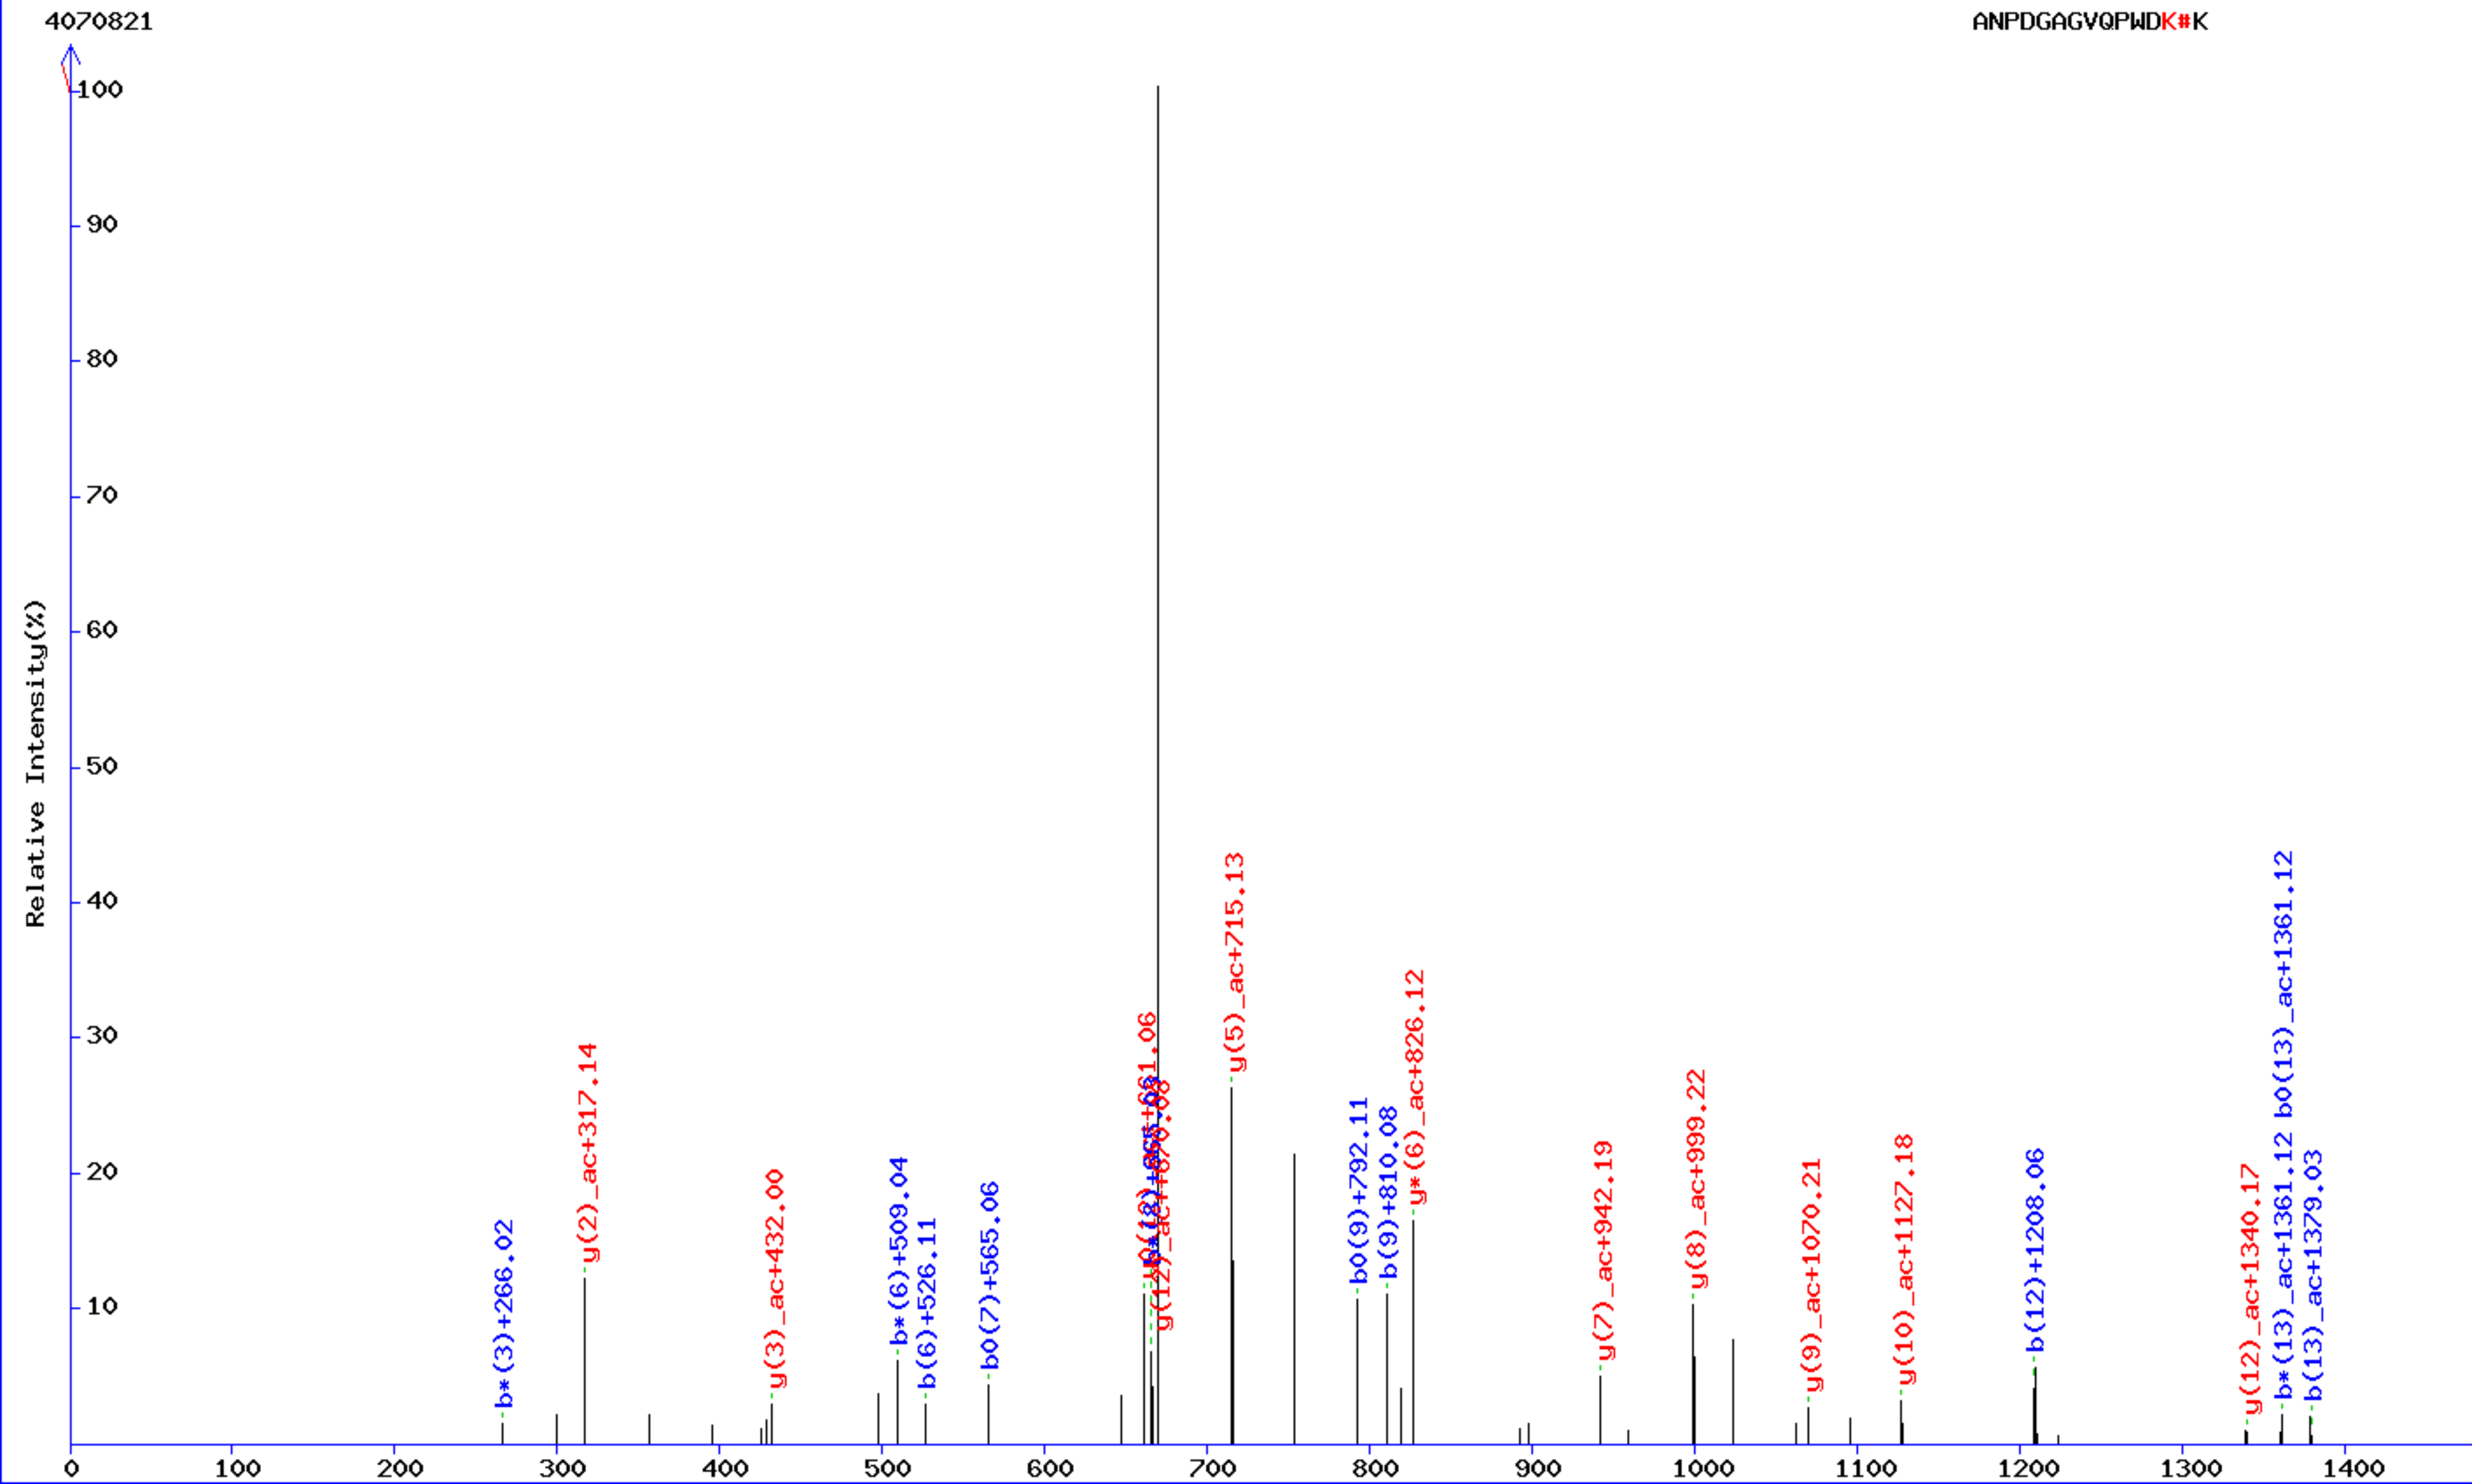

# gi|148660442 MRA\_0677 DNA-directed RNA polymerase subunit beta'

PEK#DGLFCEK

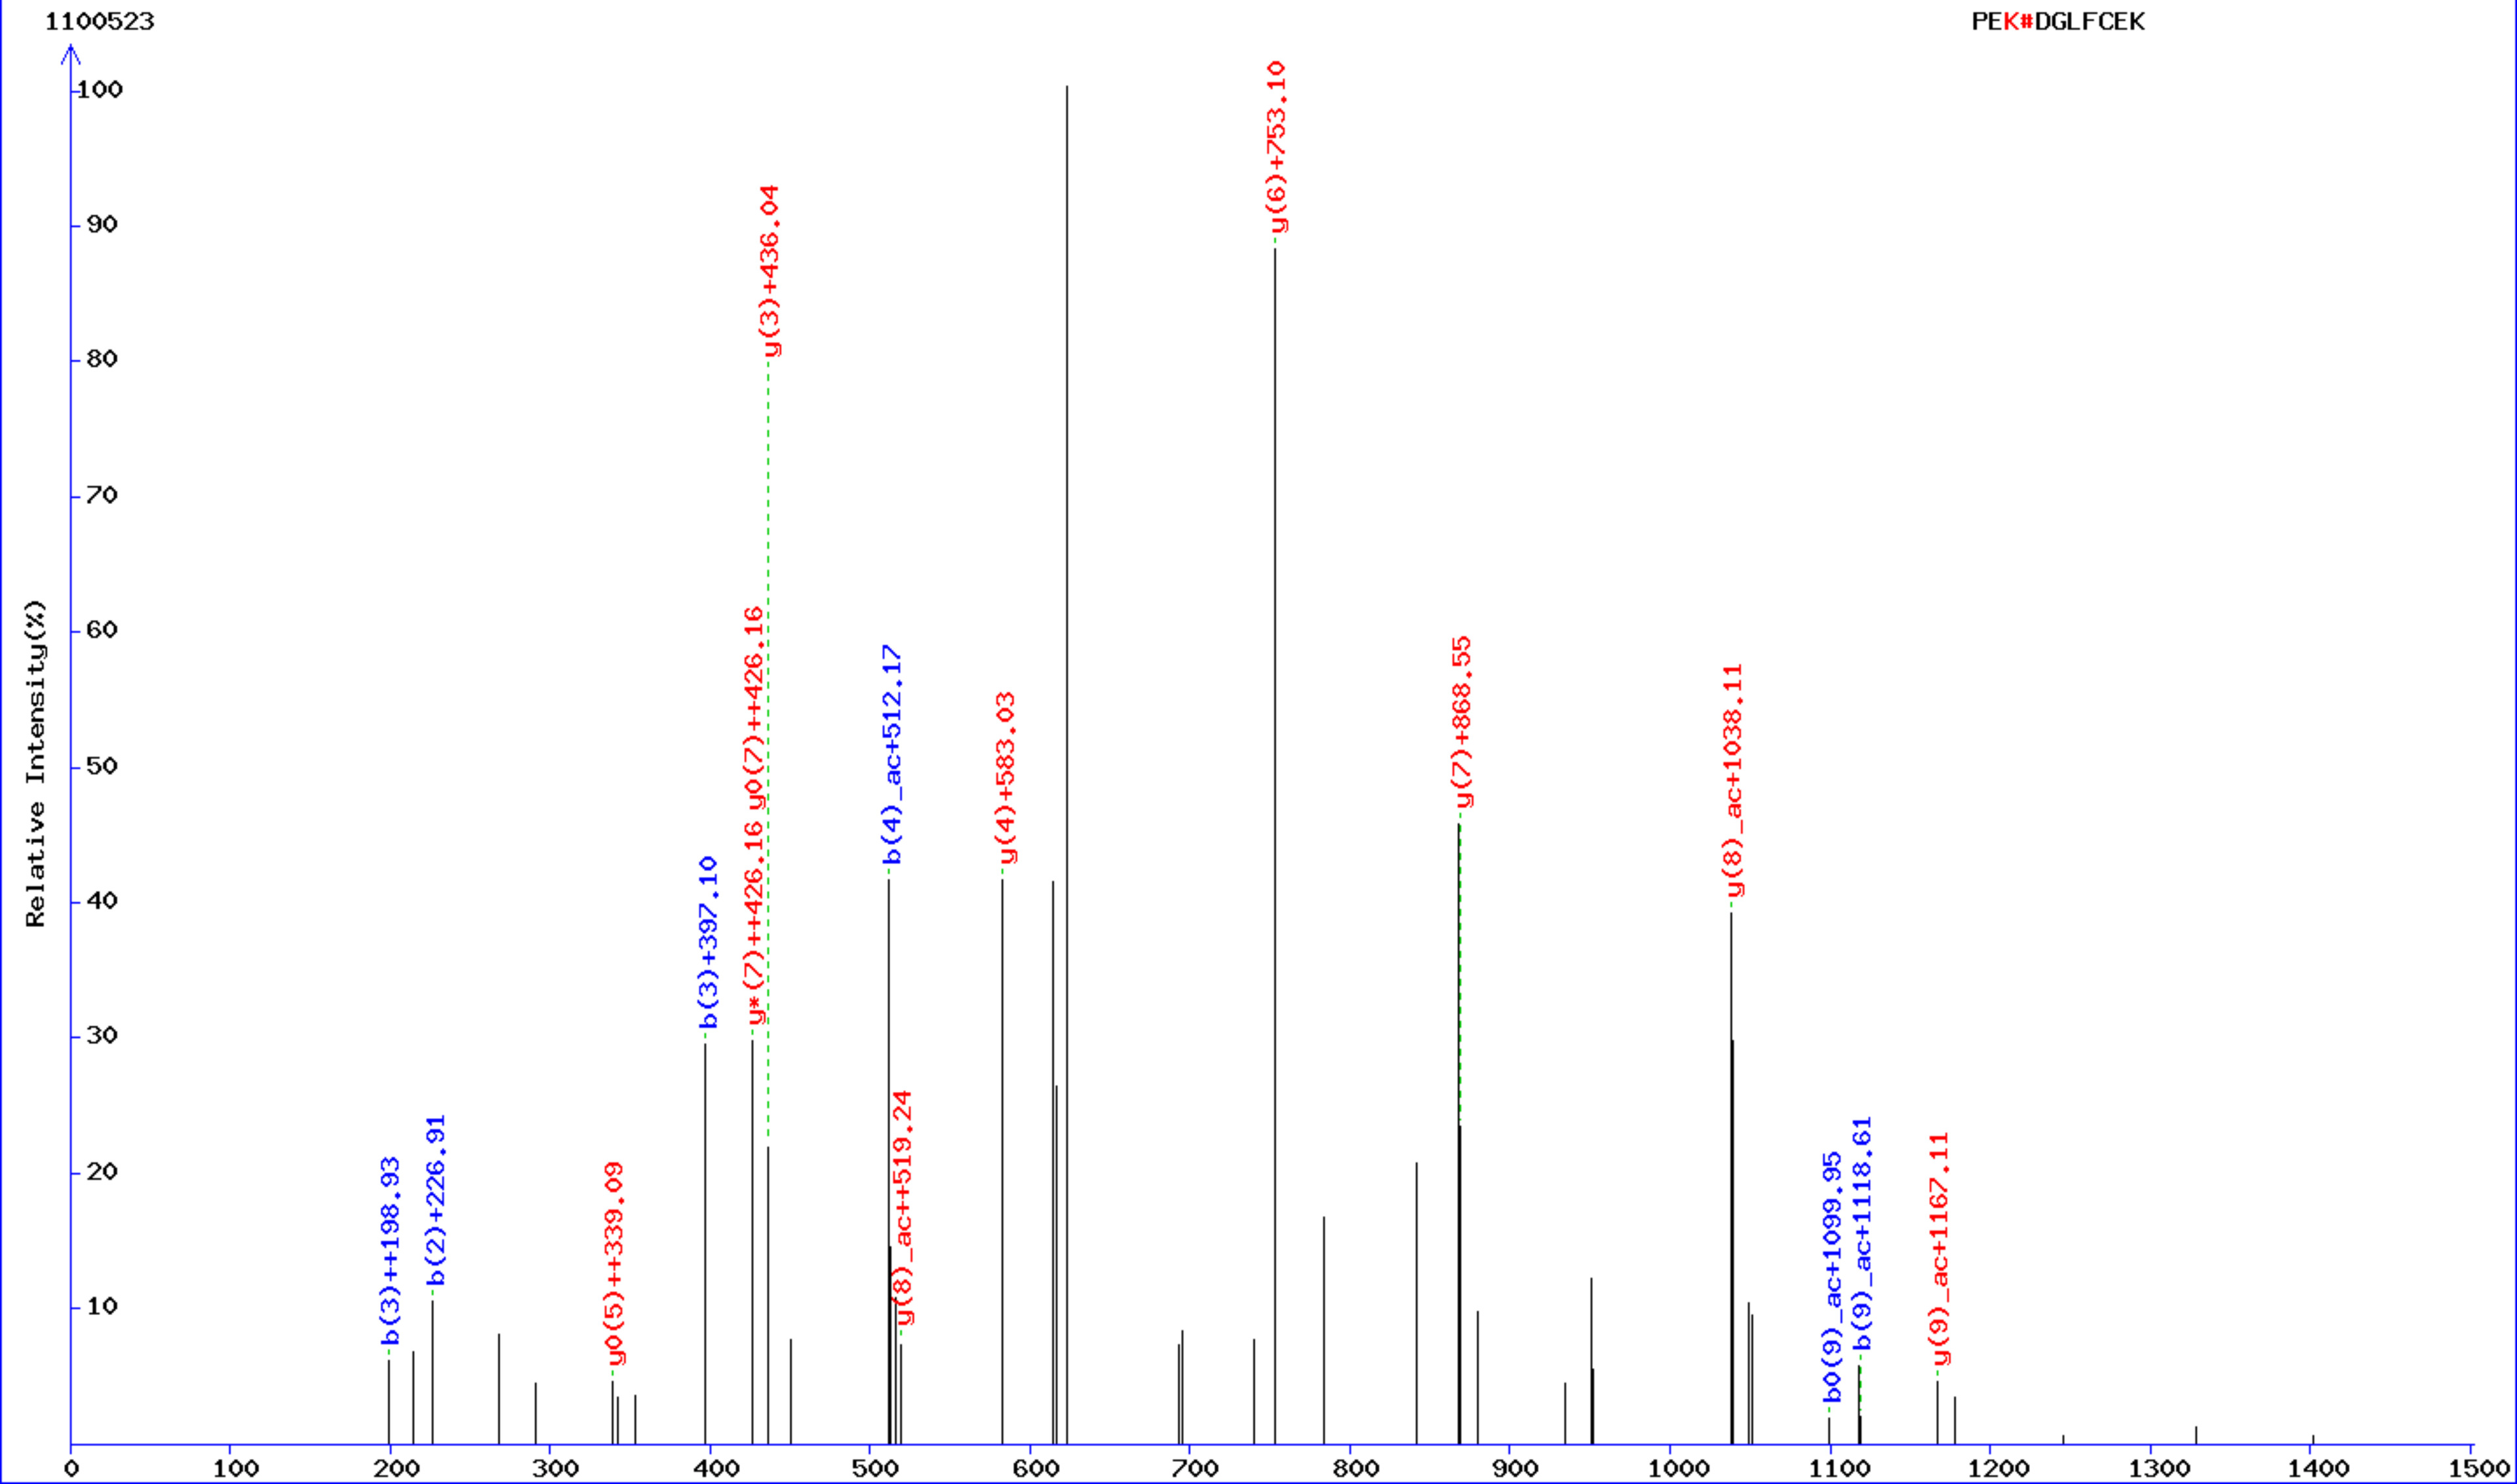

# gi|148660204 MRA\_0444 short chain dehydrogenase

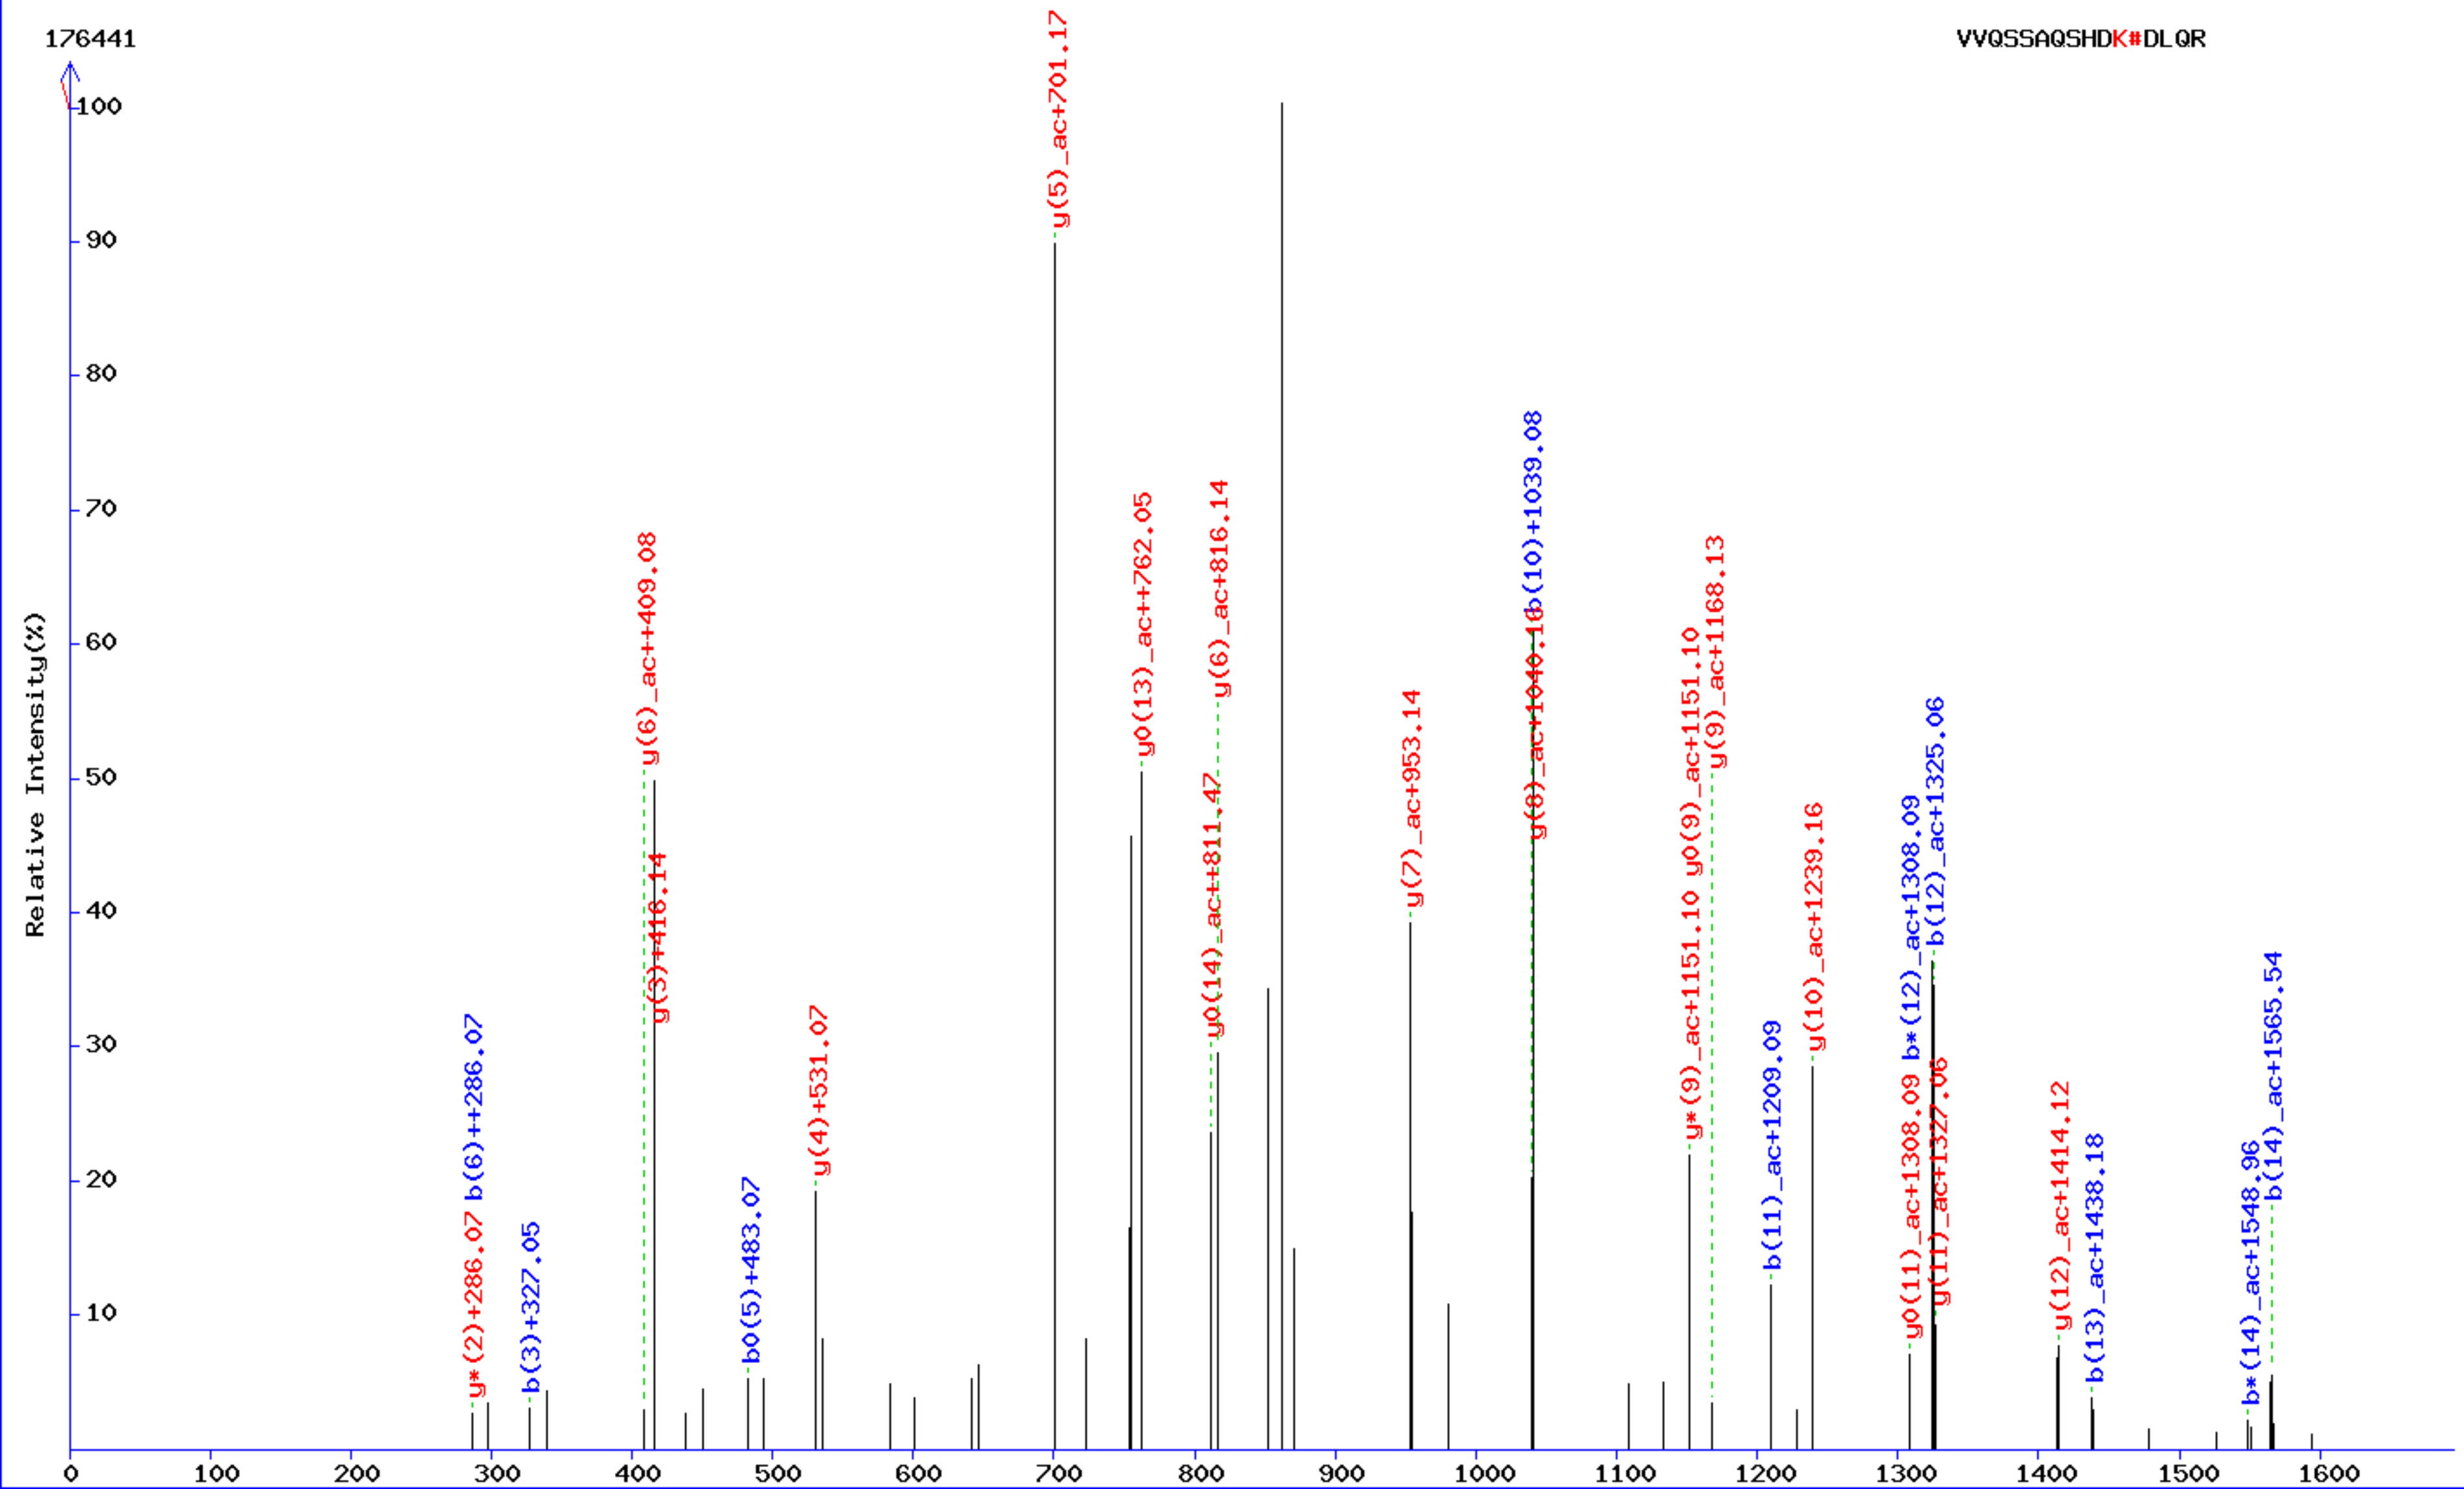

# gi|148660458 MRA\_0692 30S ribosomal protein S7

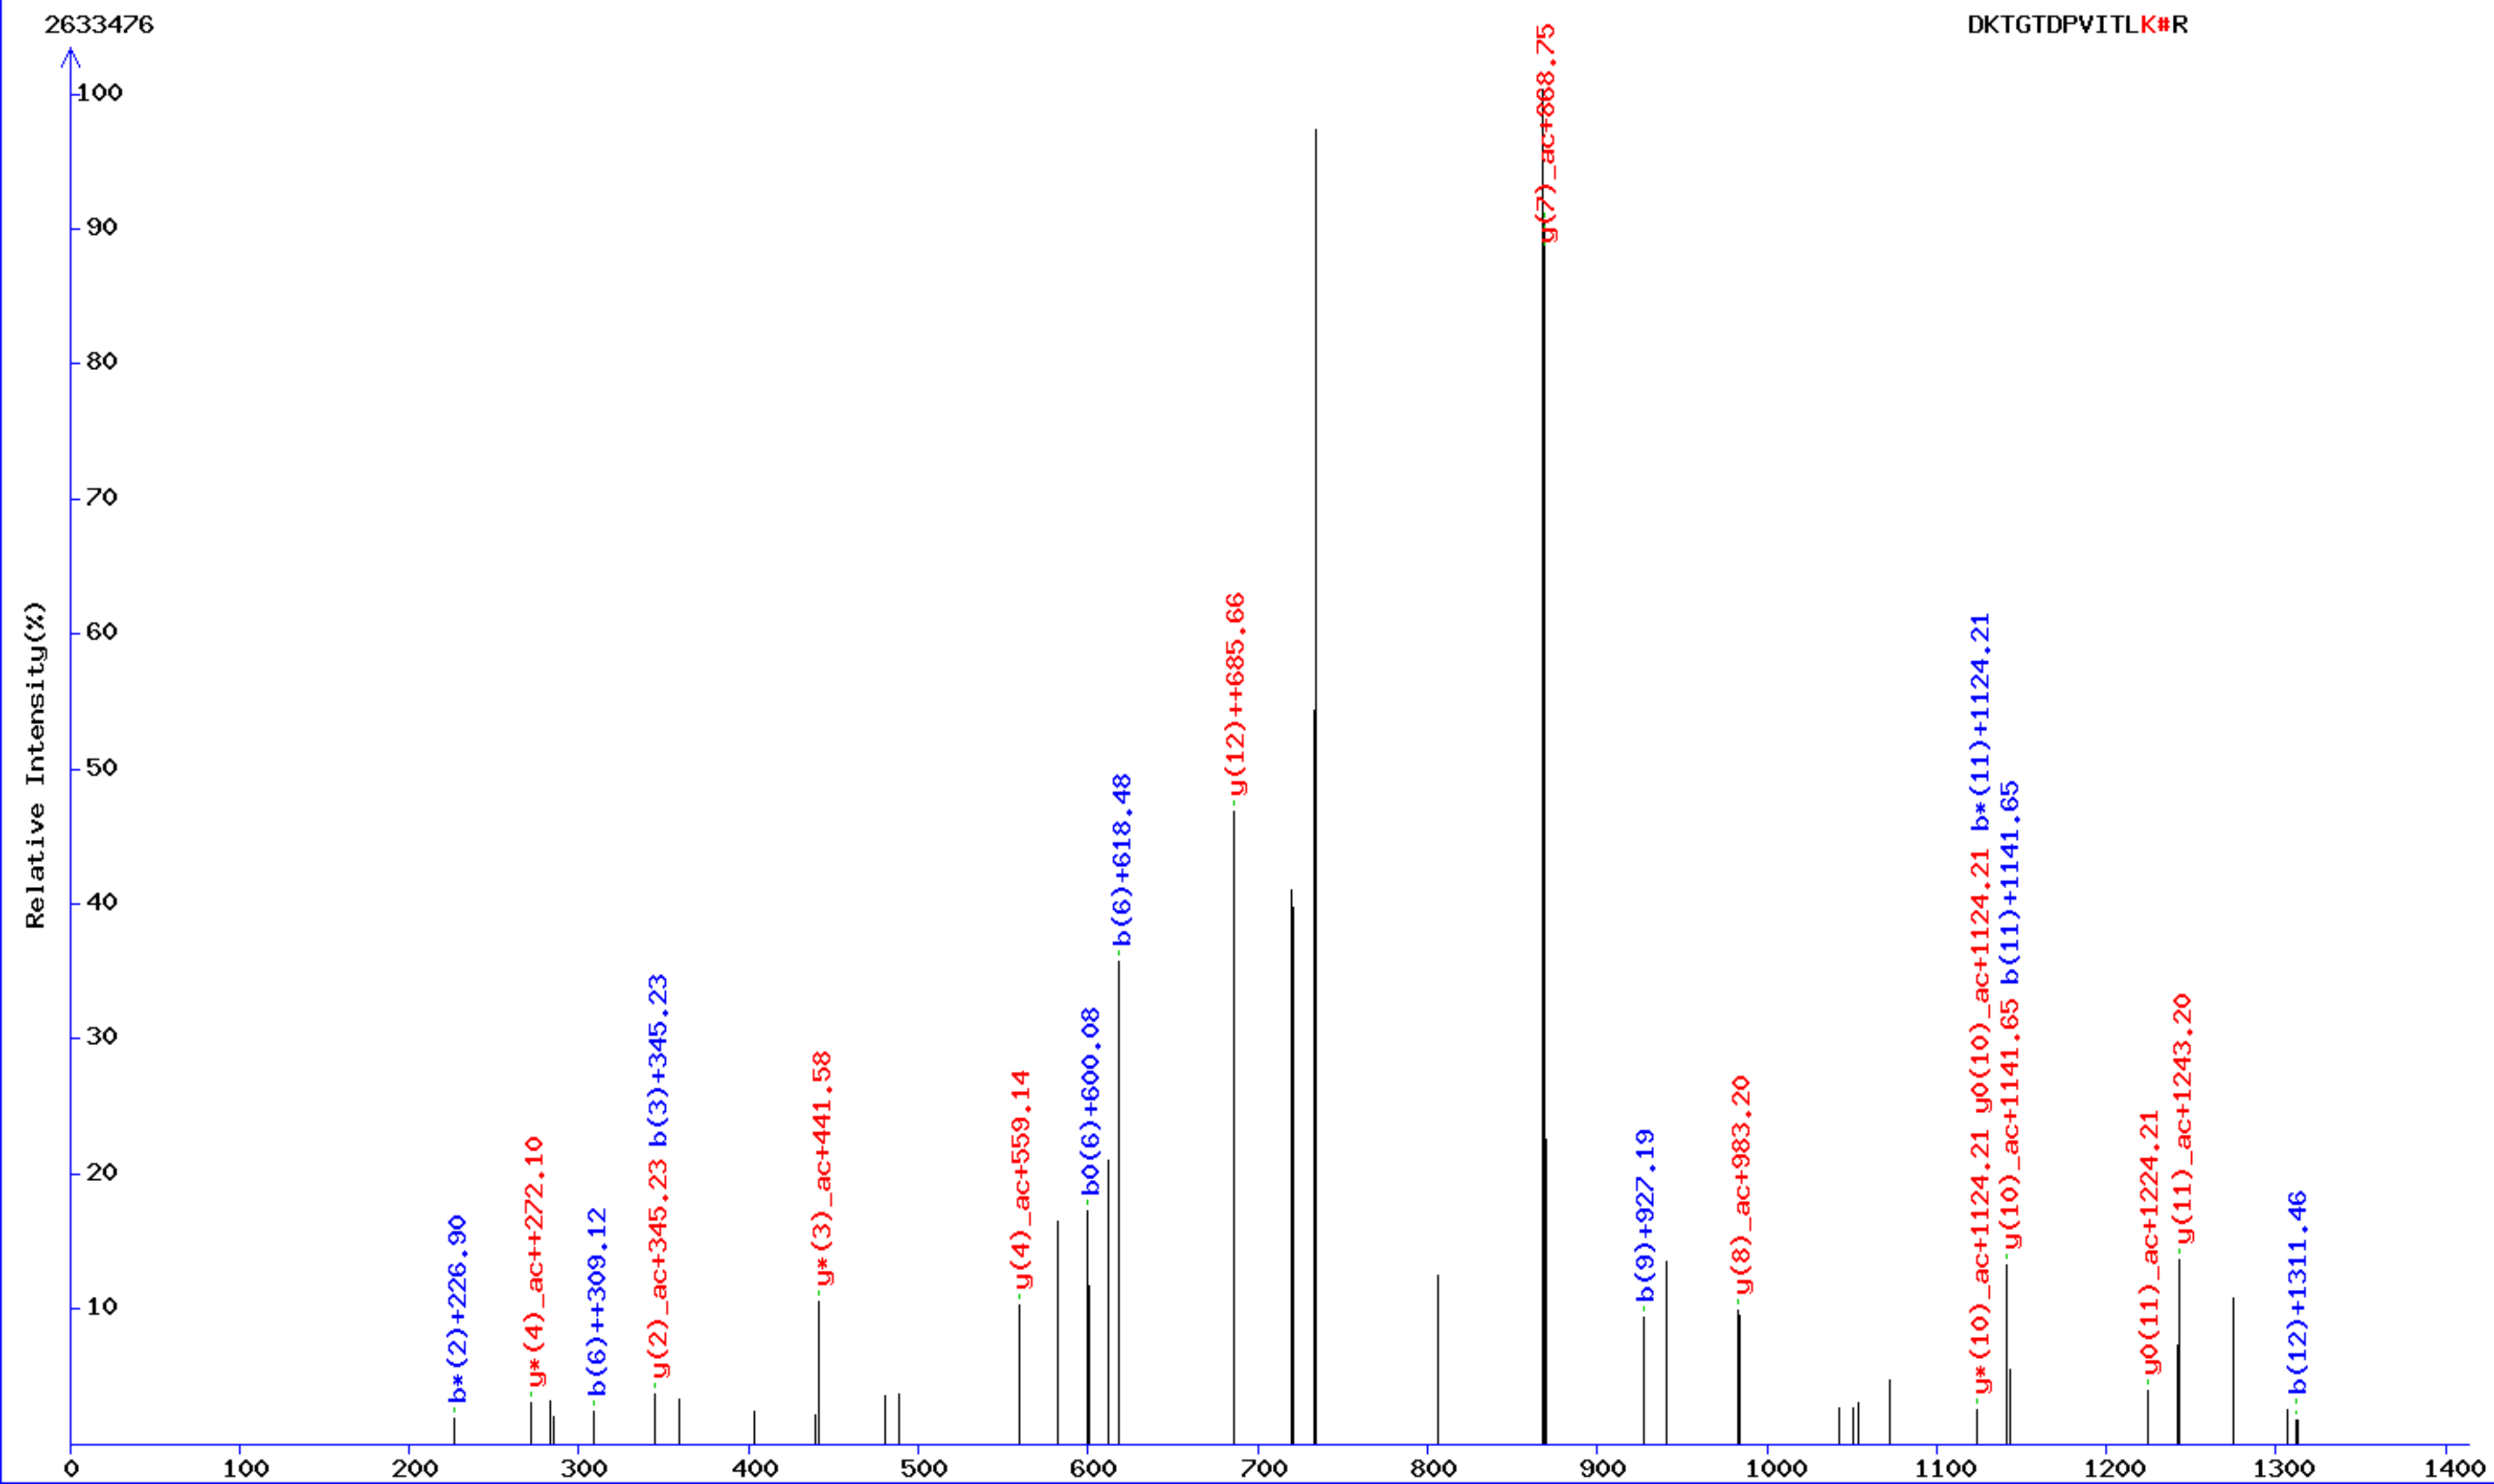

# gi|148660104 MRA\_0347 iron-sulfur-binding reductase

AAPTPAAPAAPVKGLGIAAGA (K#) RPGA(K#)

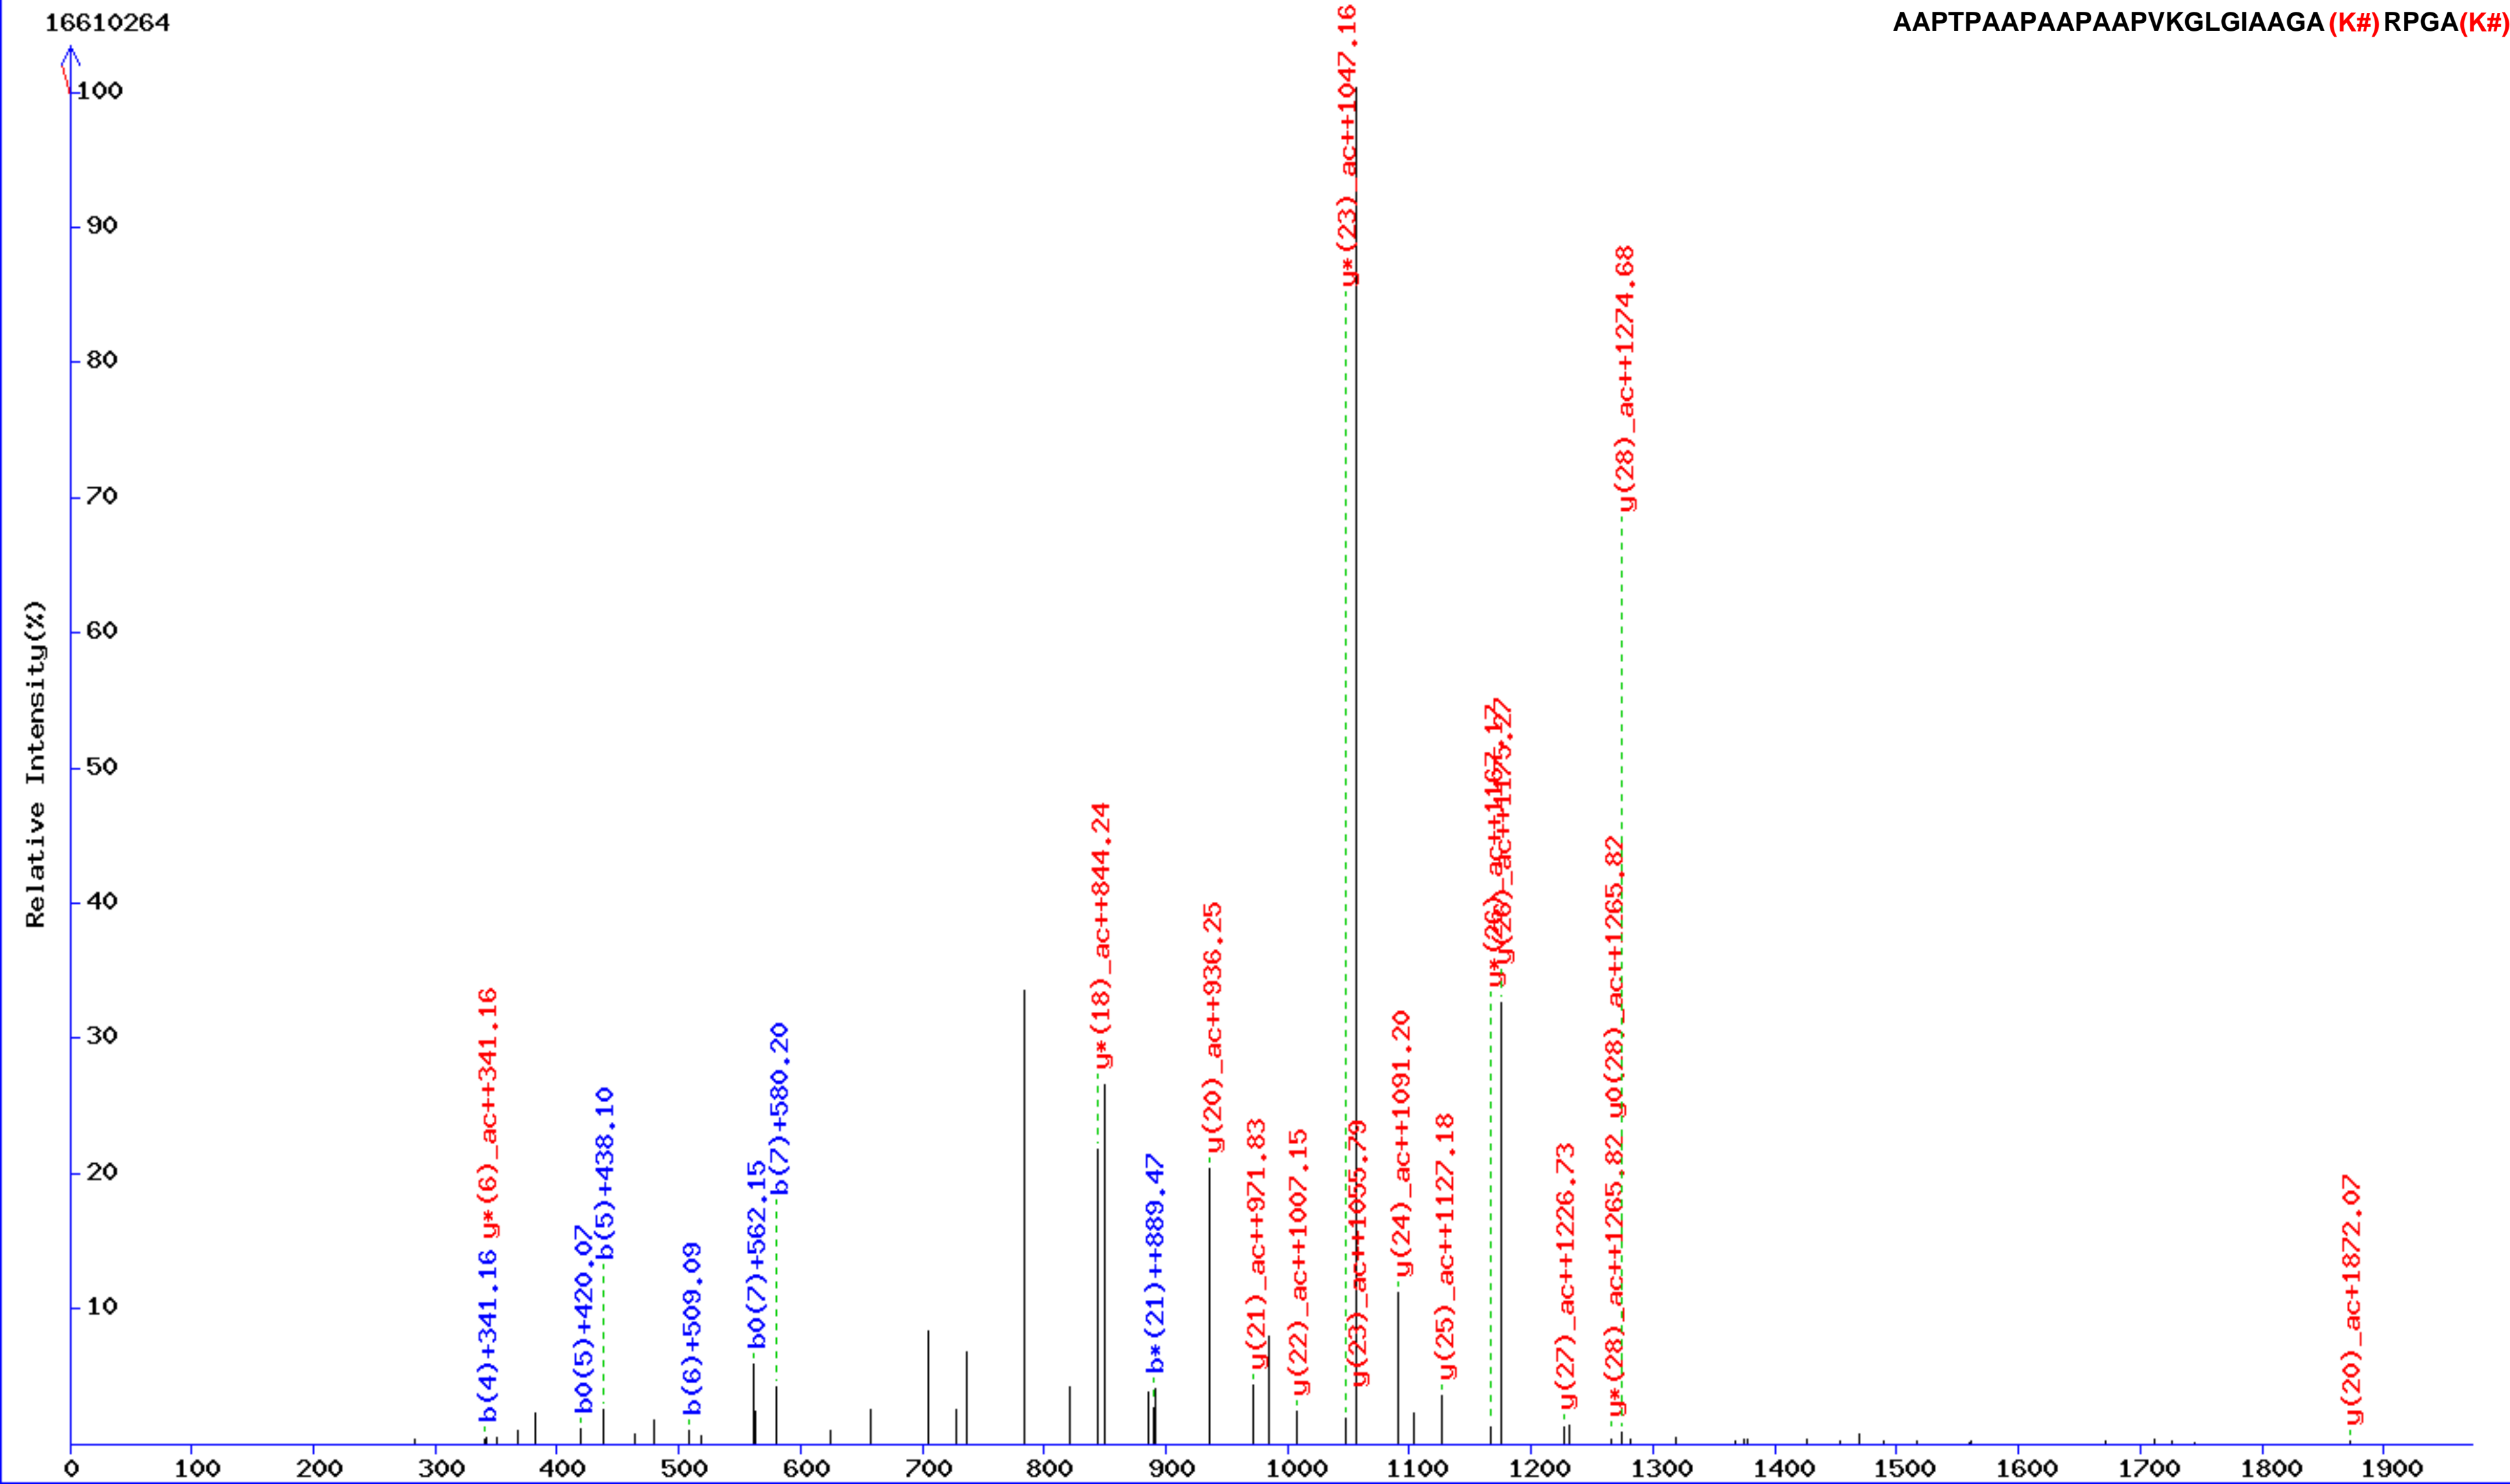

# gi|148660228 MRA\_0468 dihydrolipoamide dehydrogenase

ALPNEDADVSK#EIEK

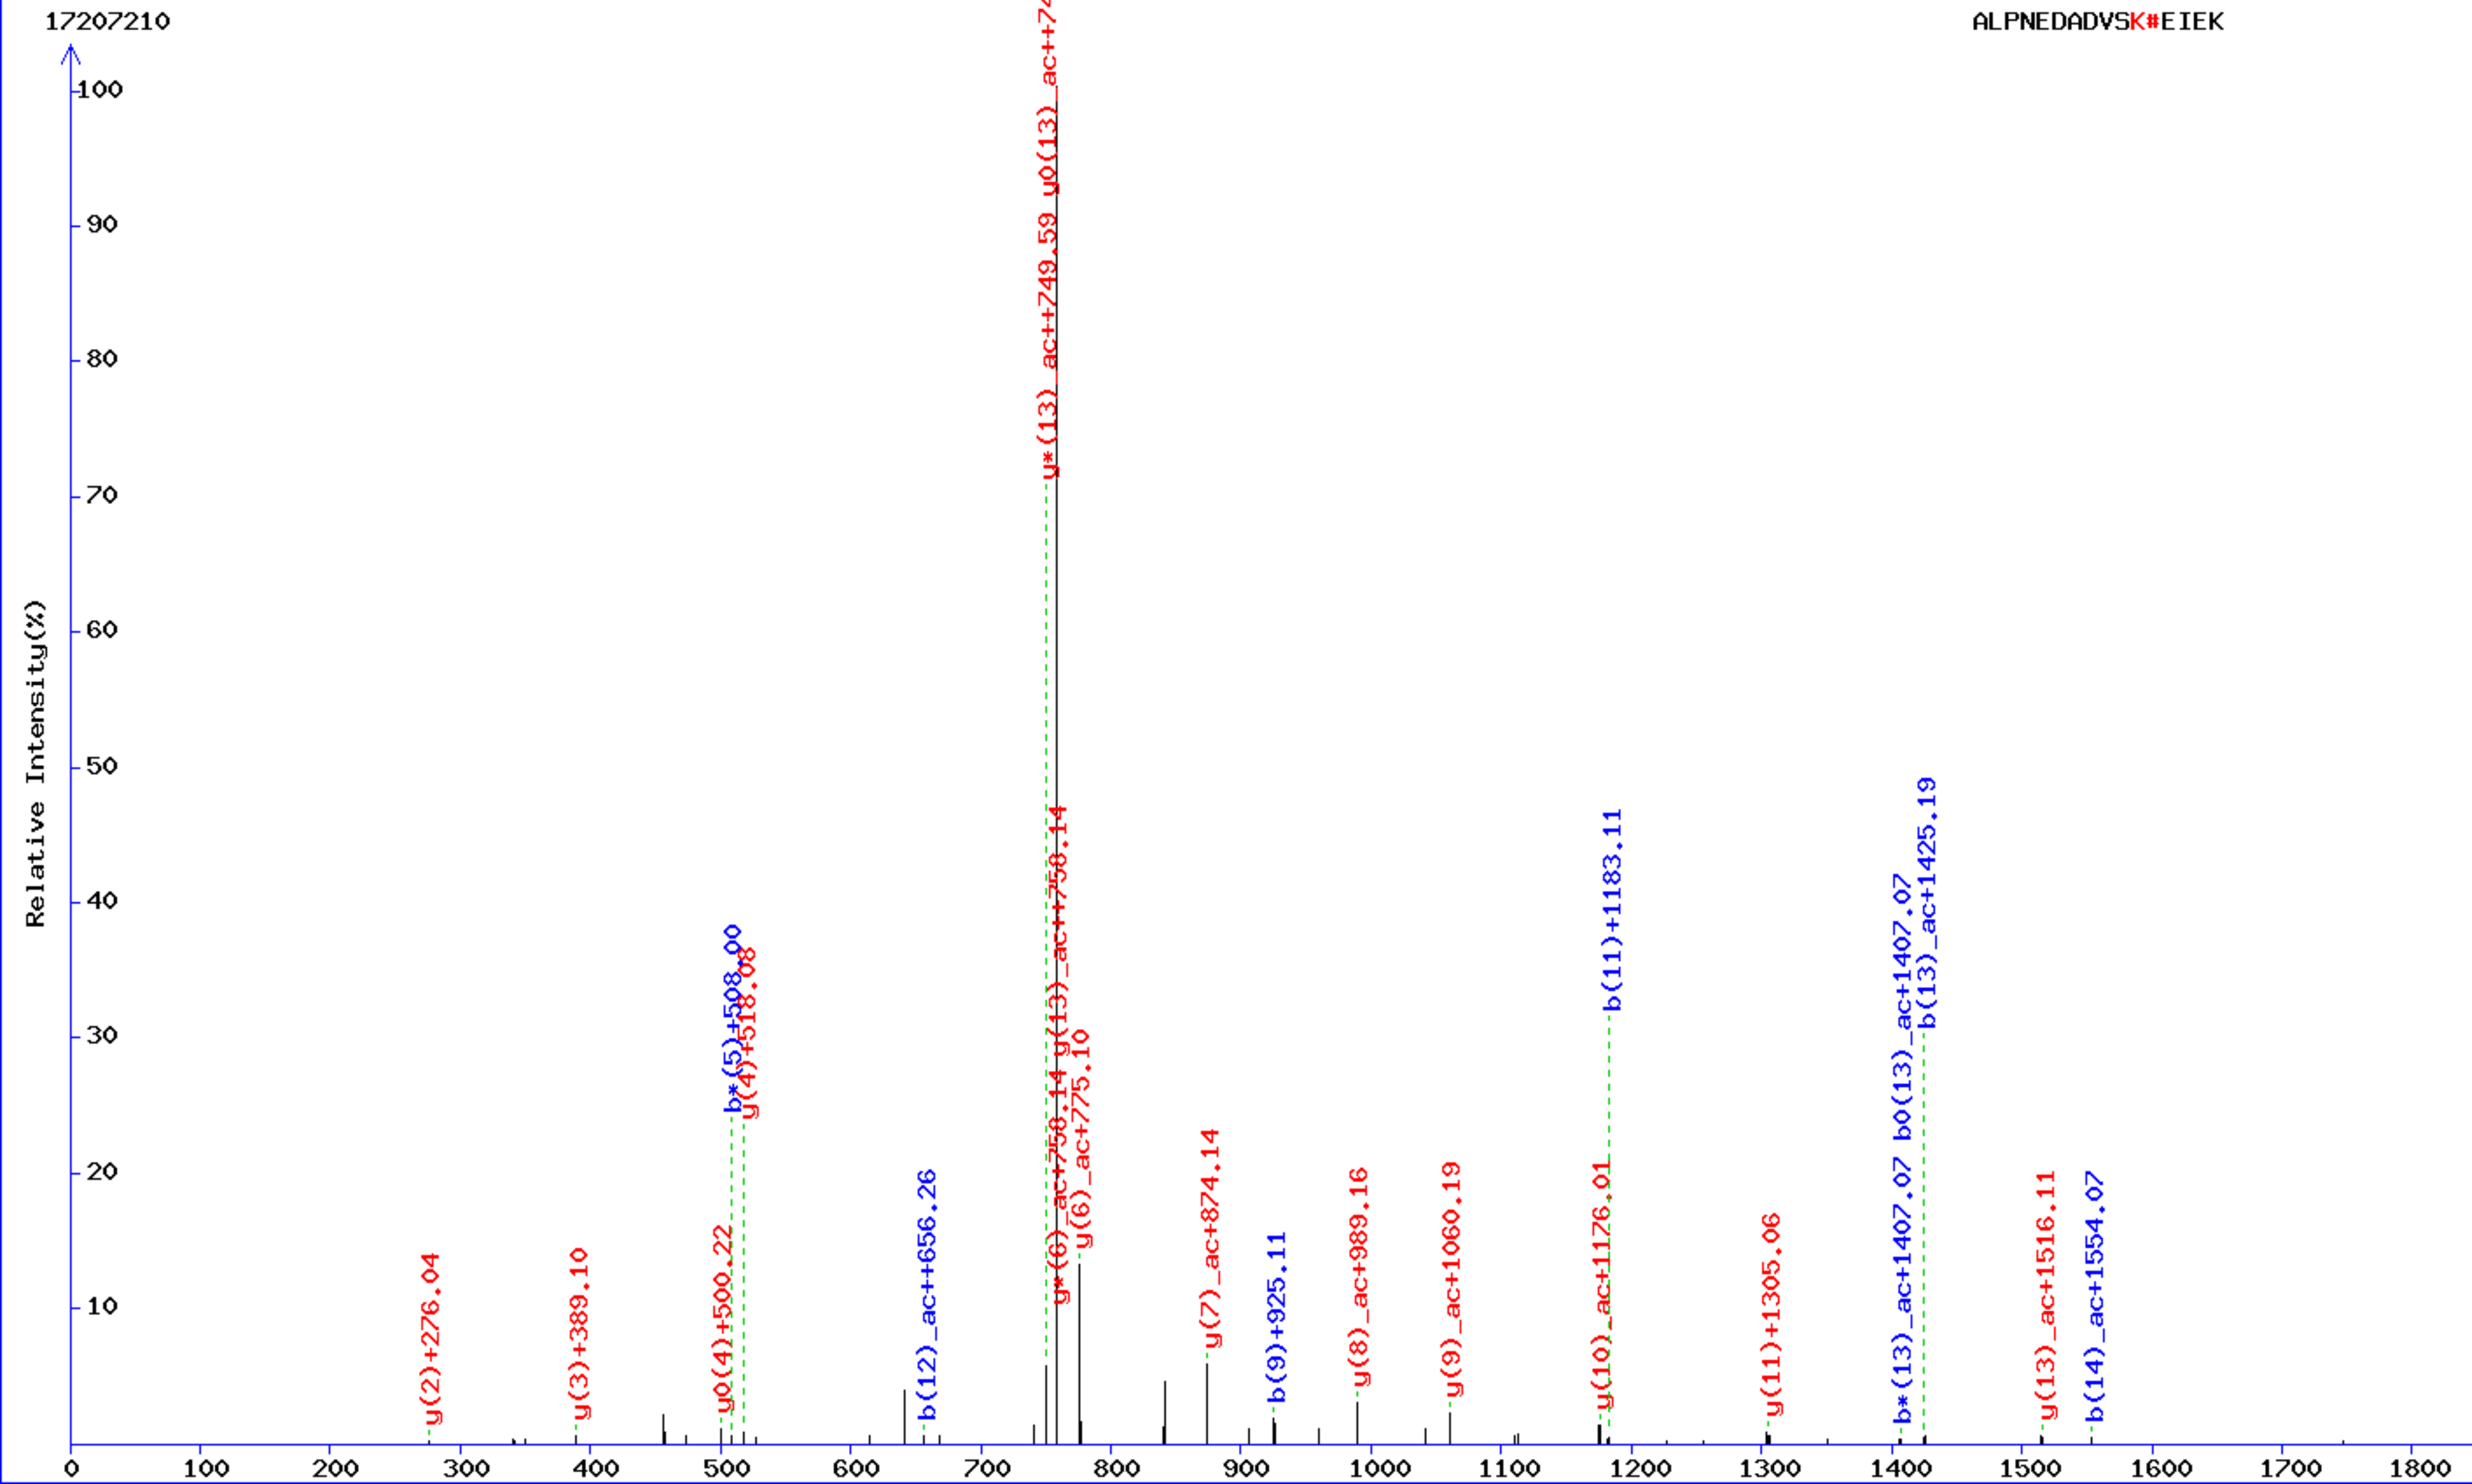

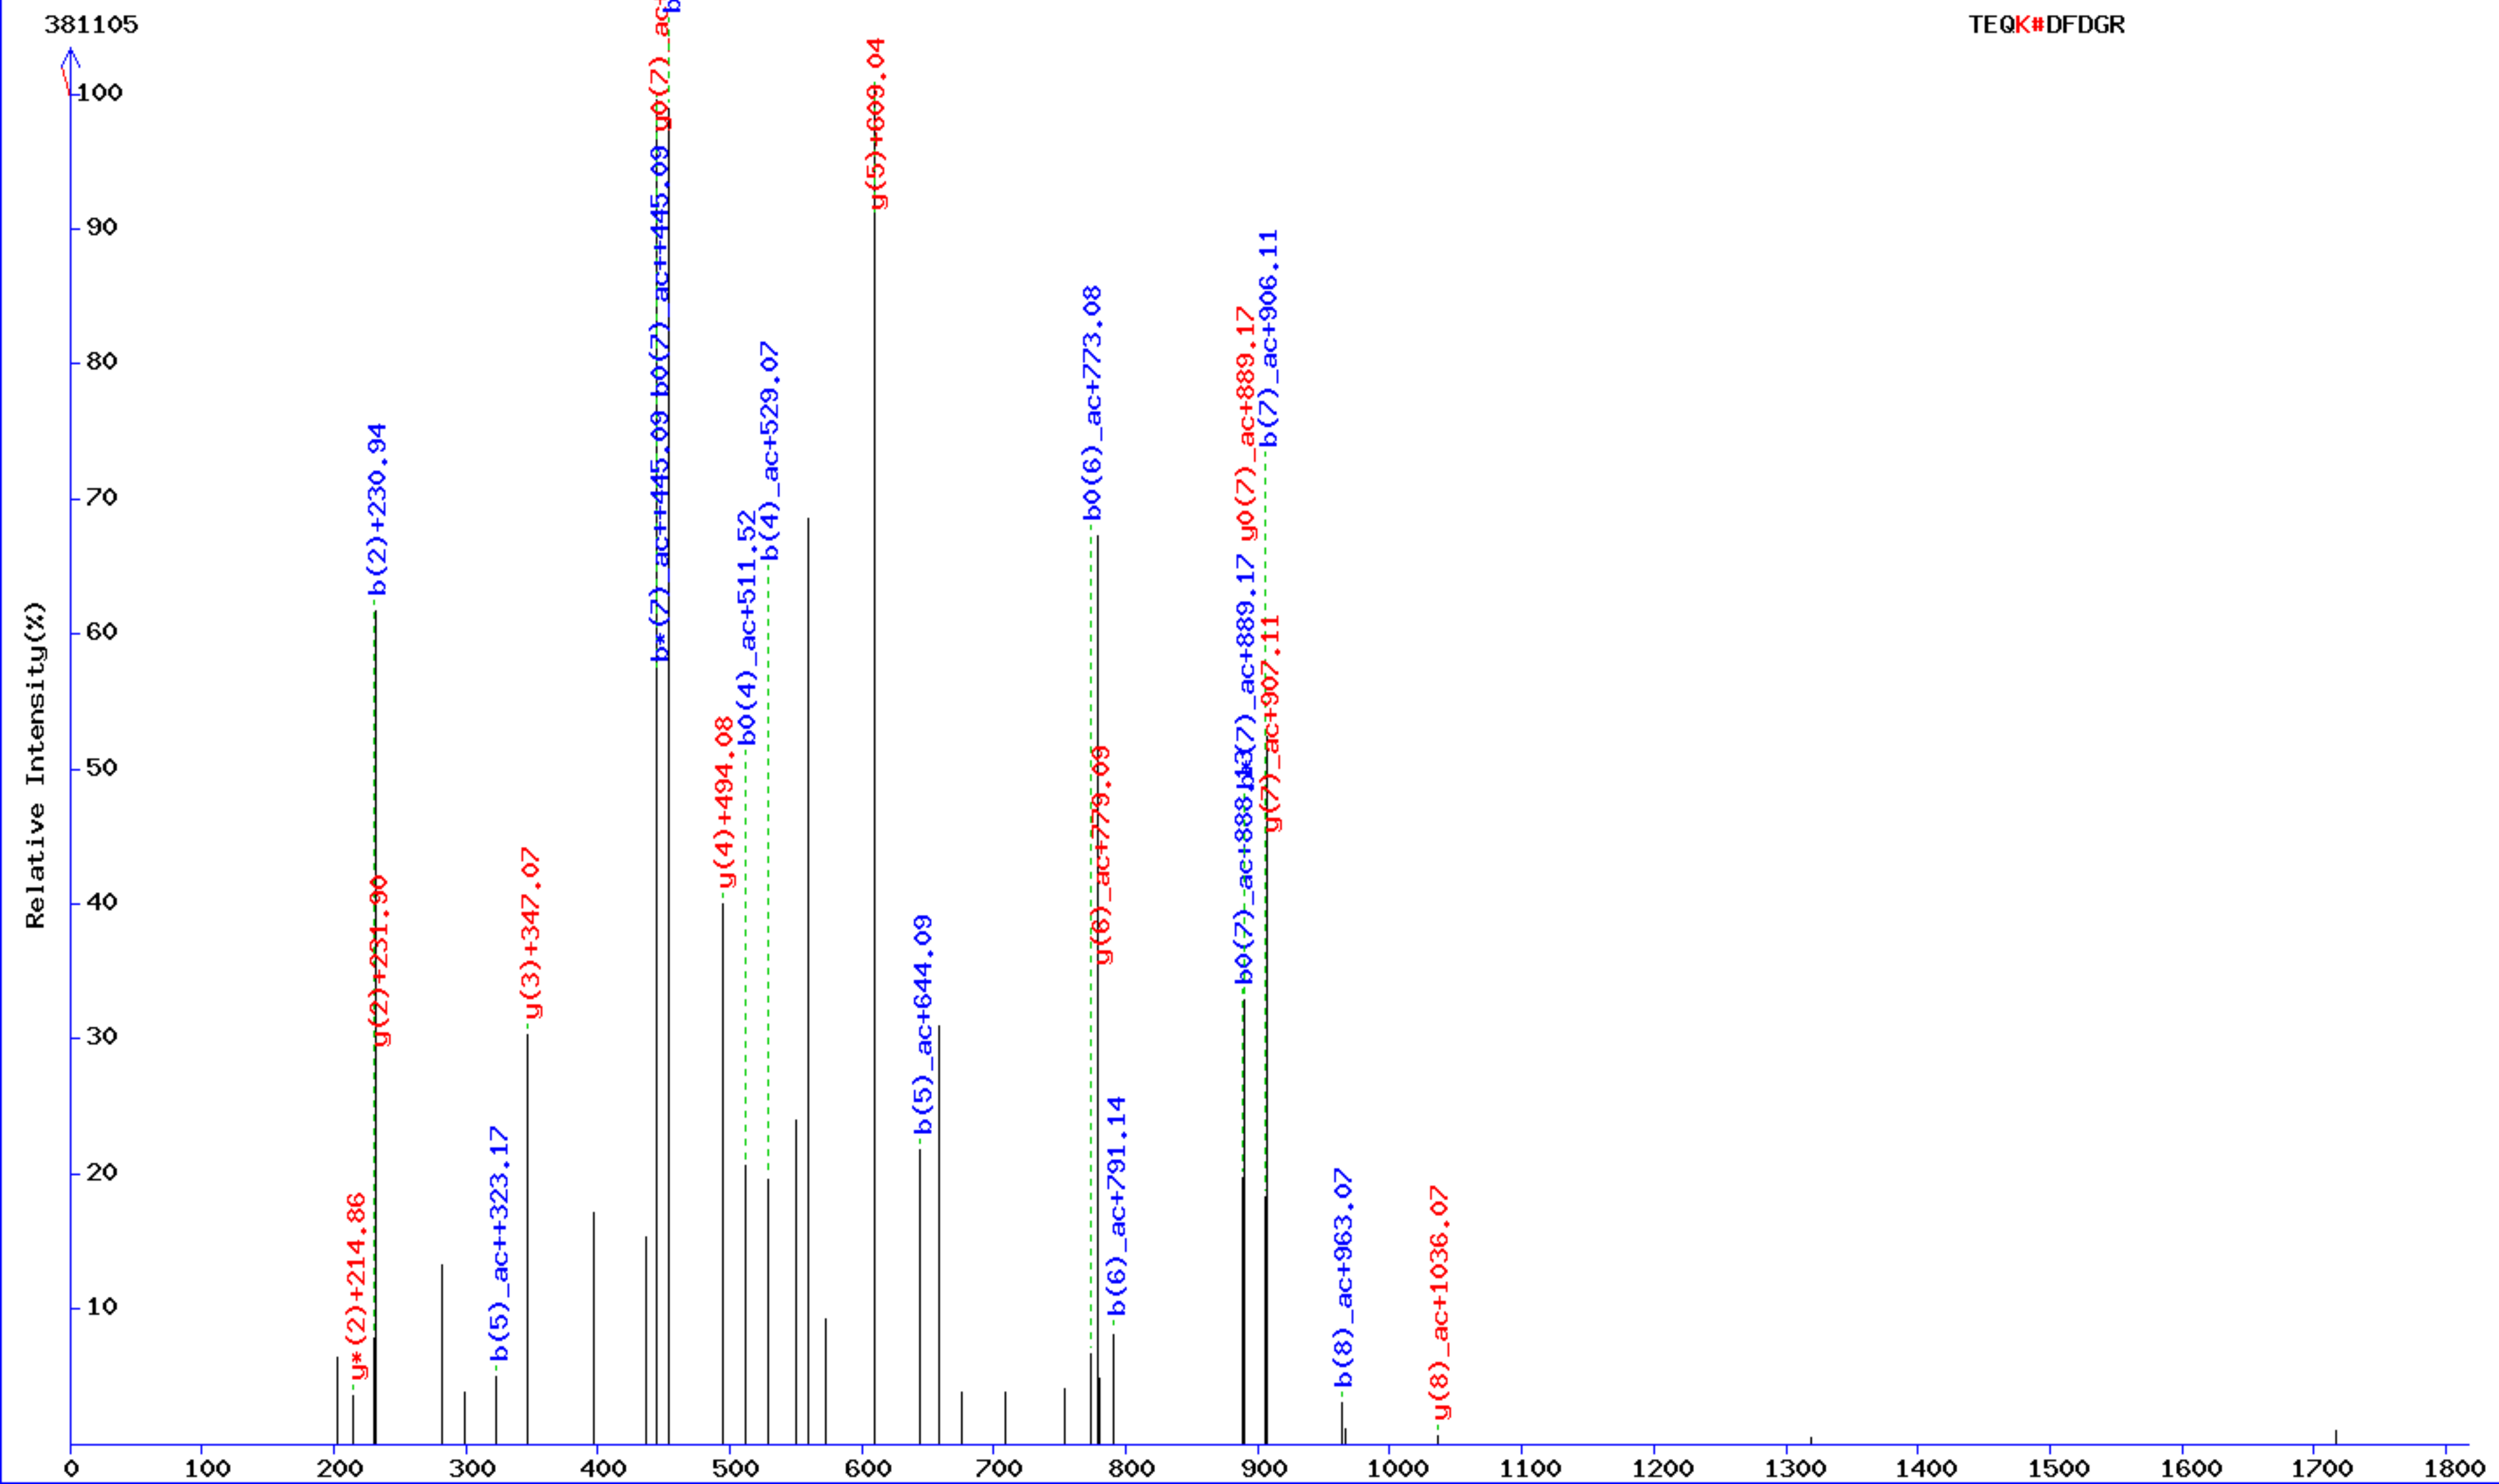



# gi|148660731 MRA\_0959 succinyl-CoA synthetase subunit alpha

KAGTTVTHEDK#GGR

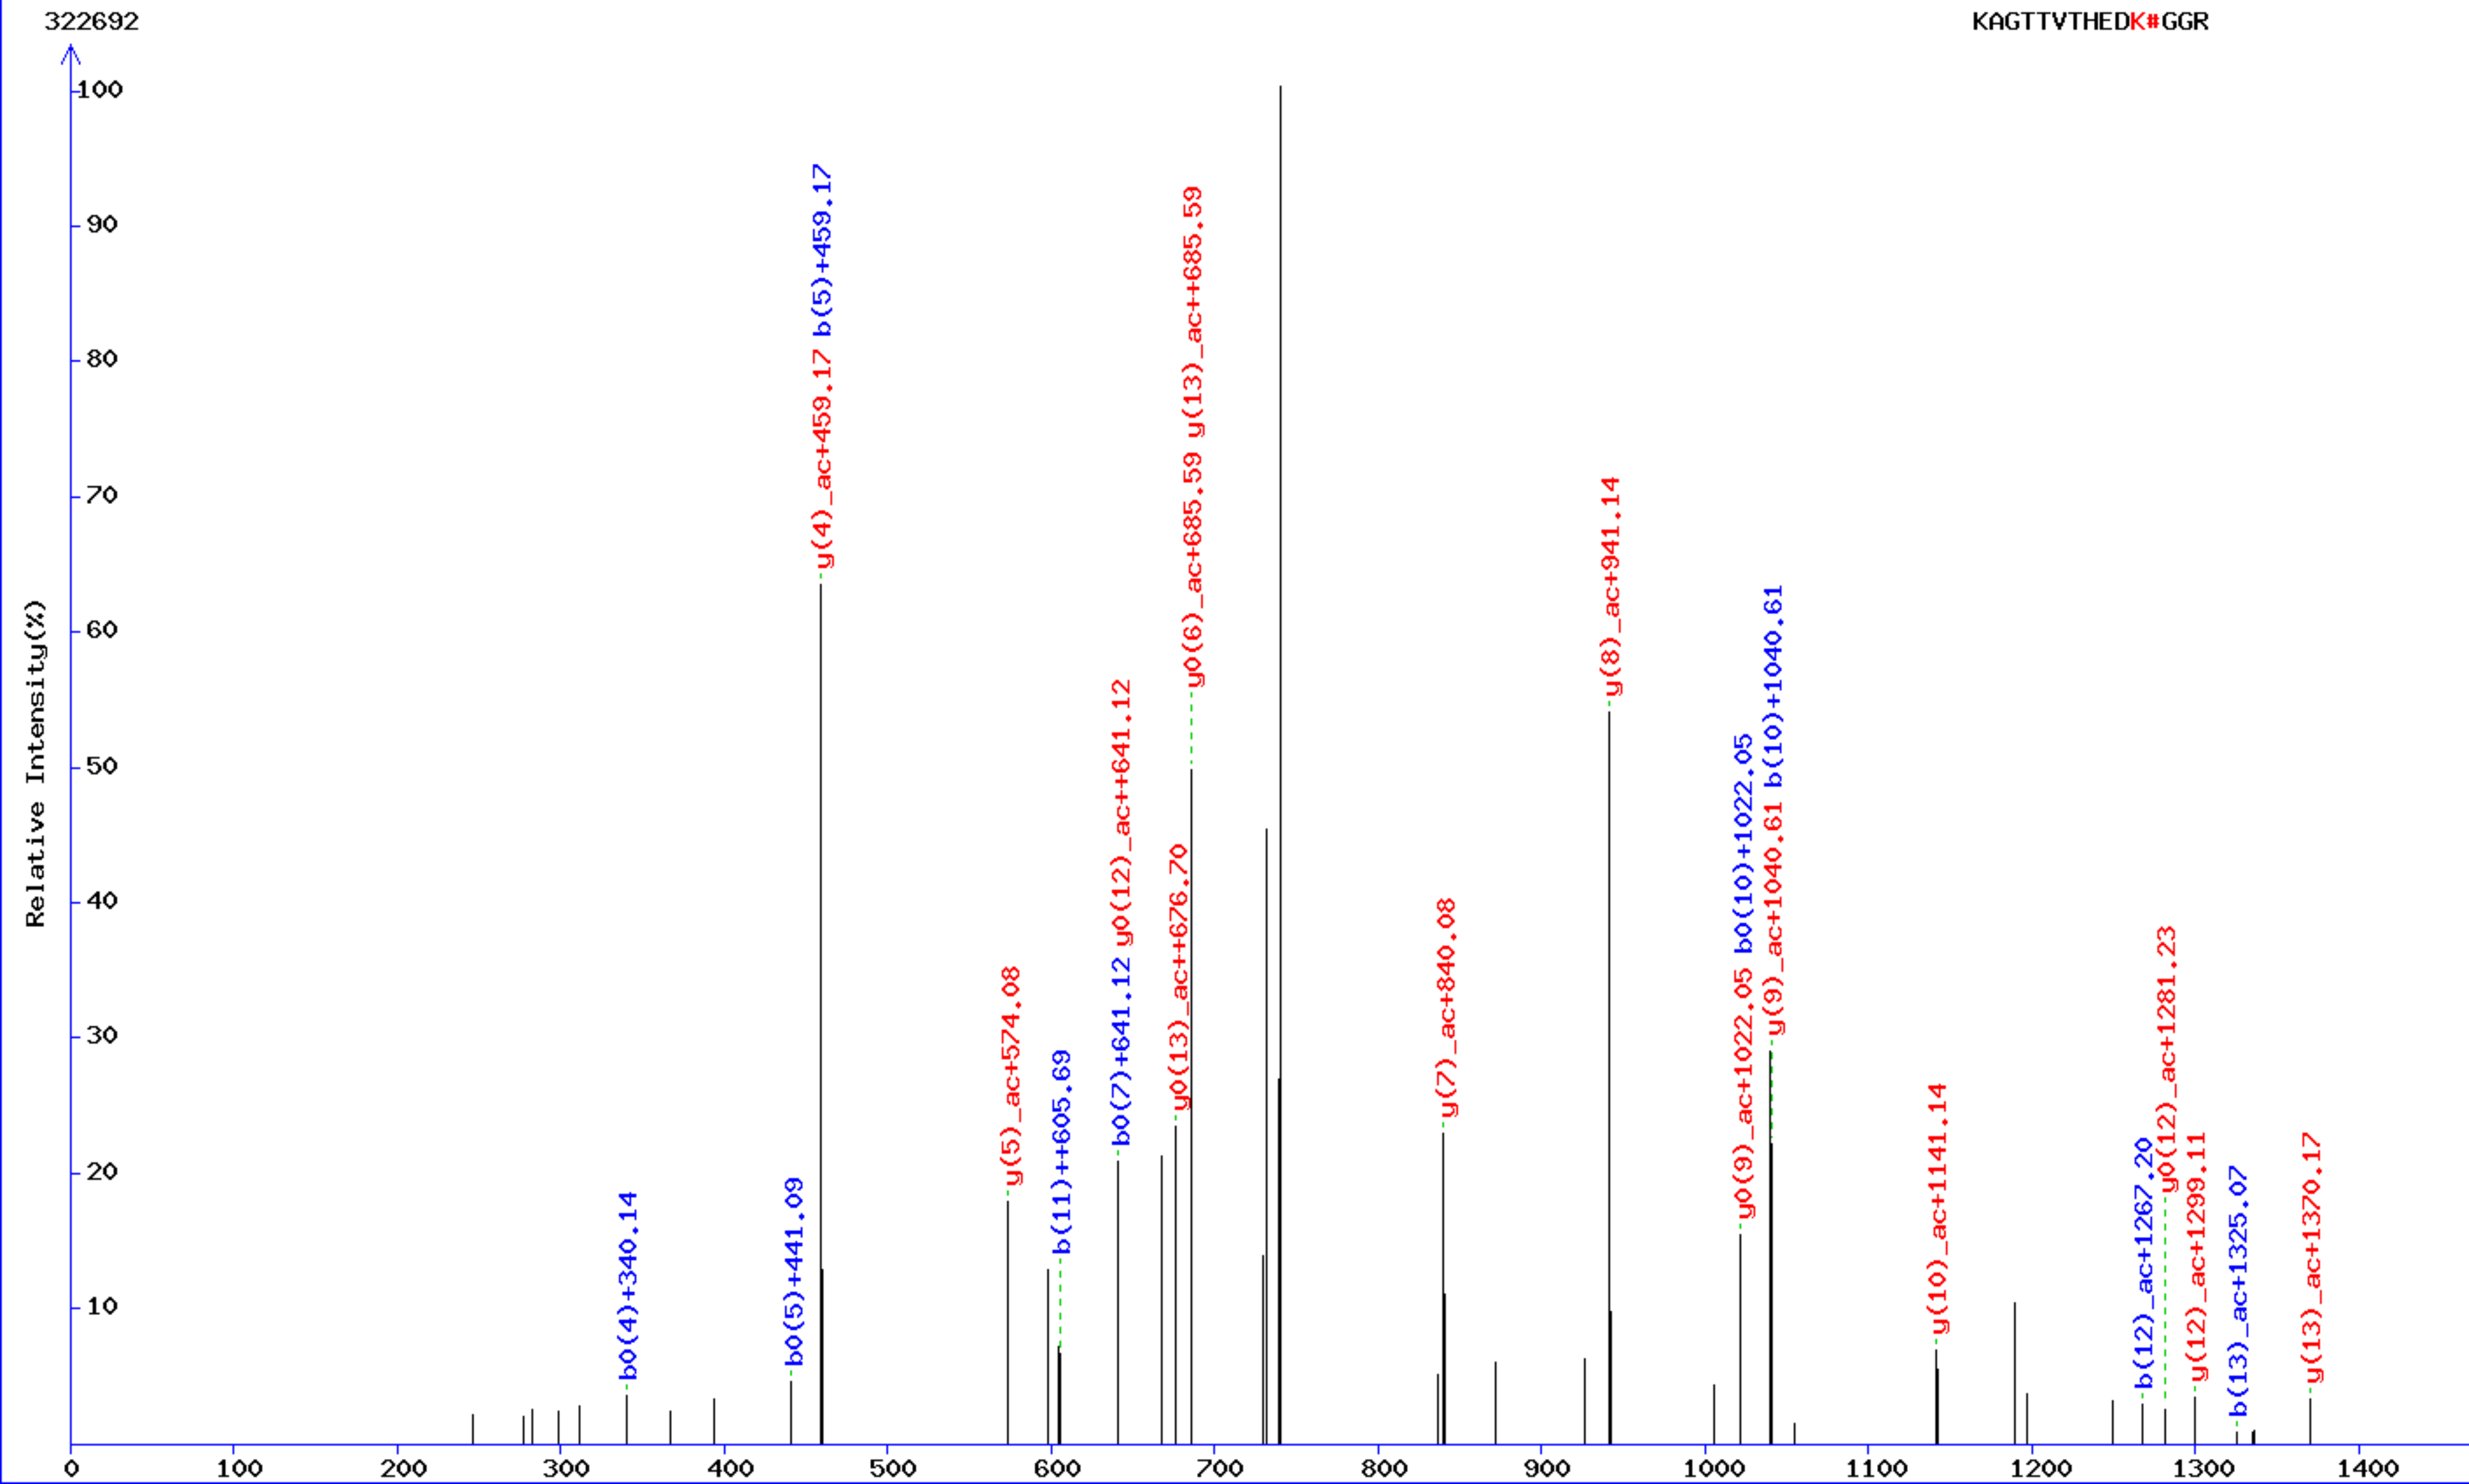

# gi|148660458 MRA\_0692 30S ribosomal protein S7

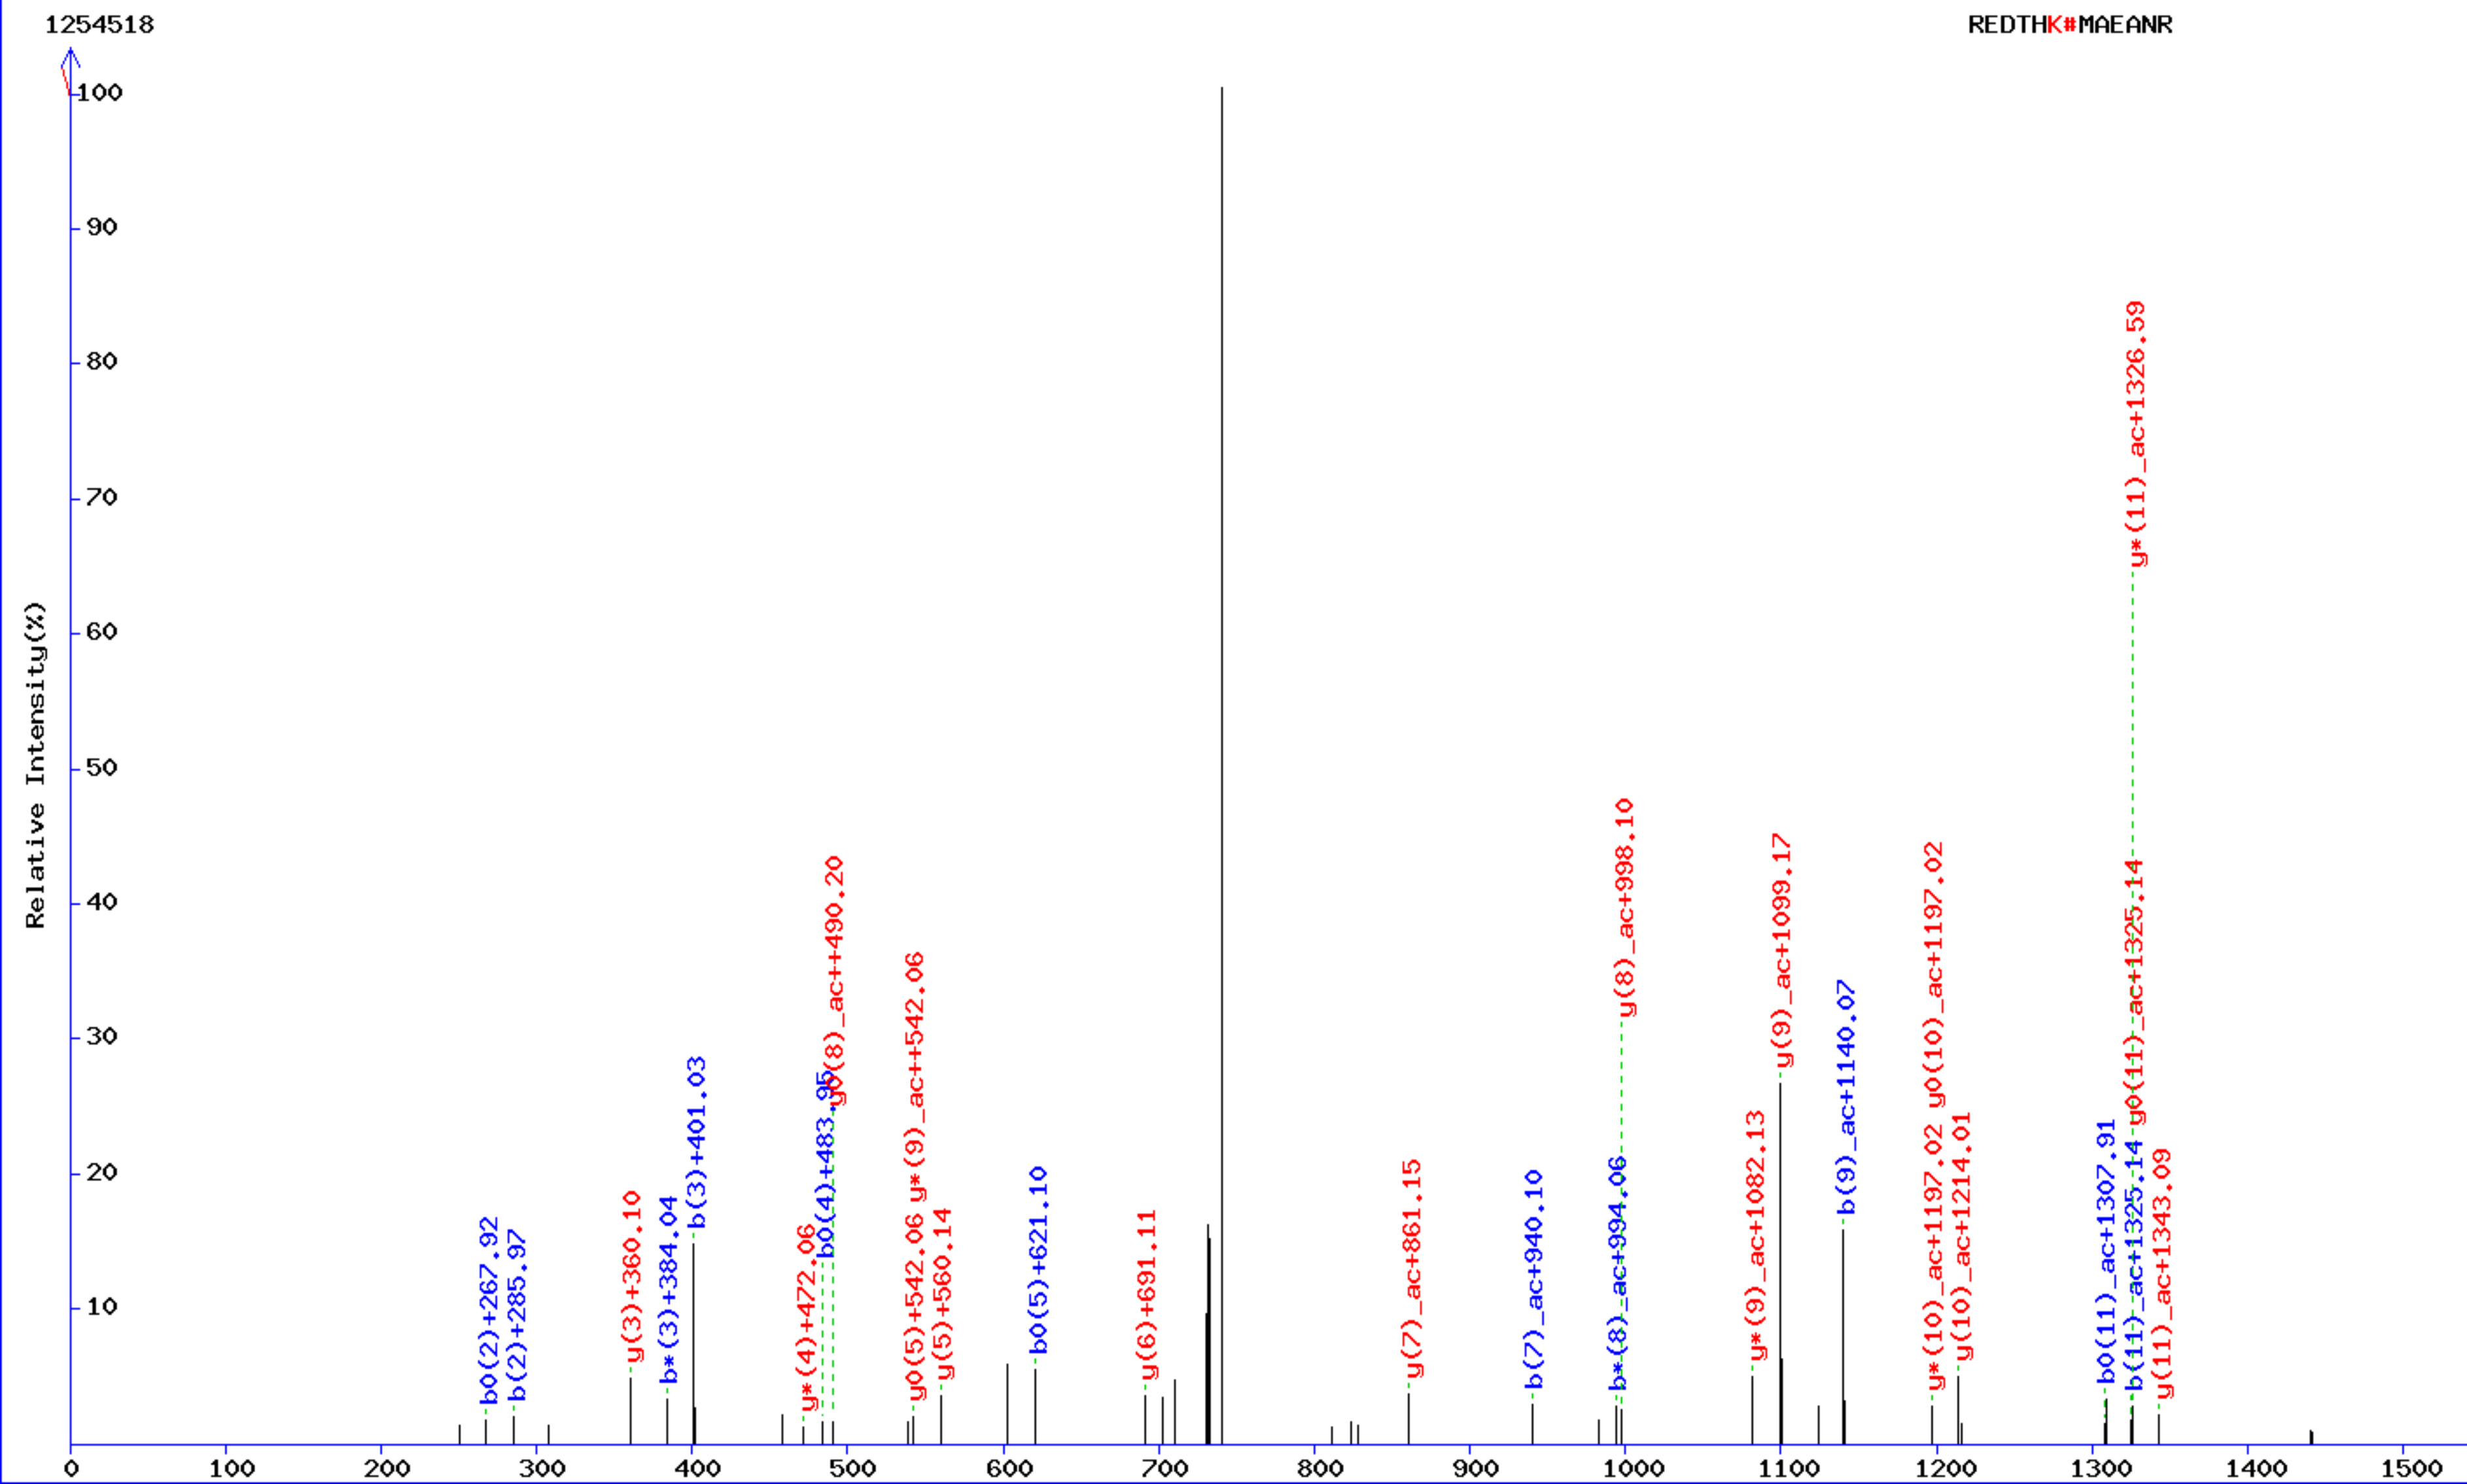

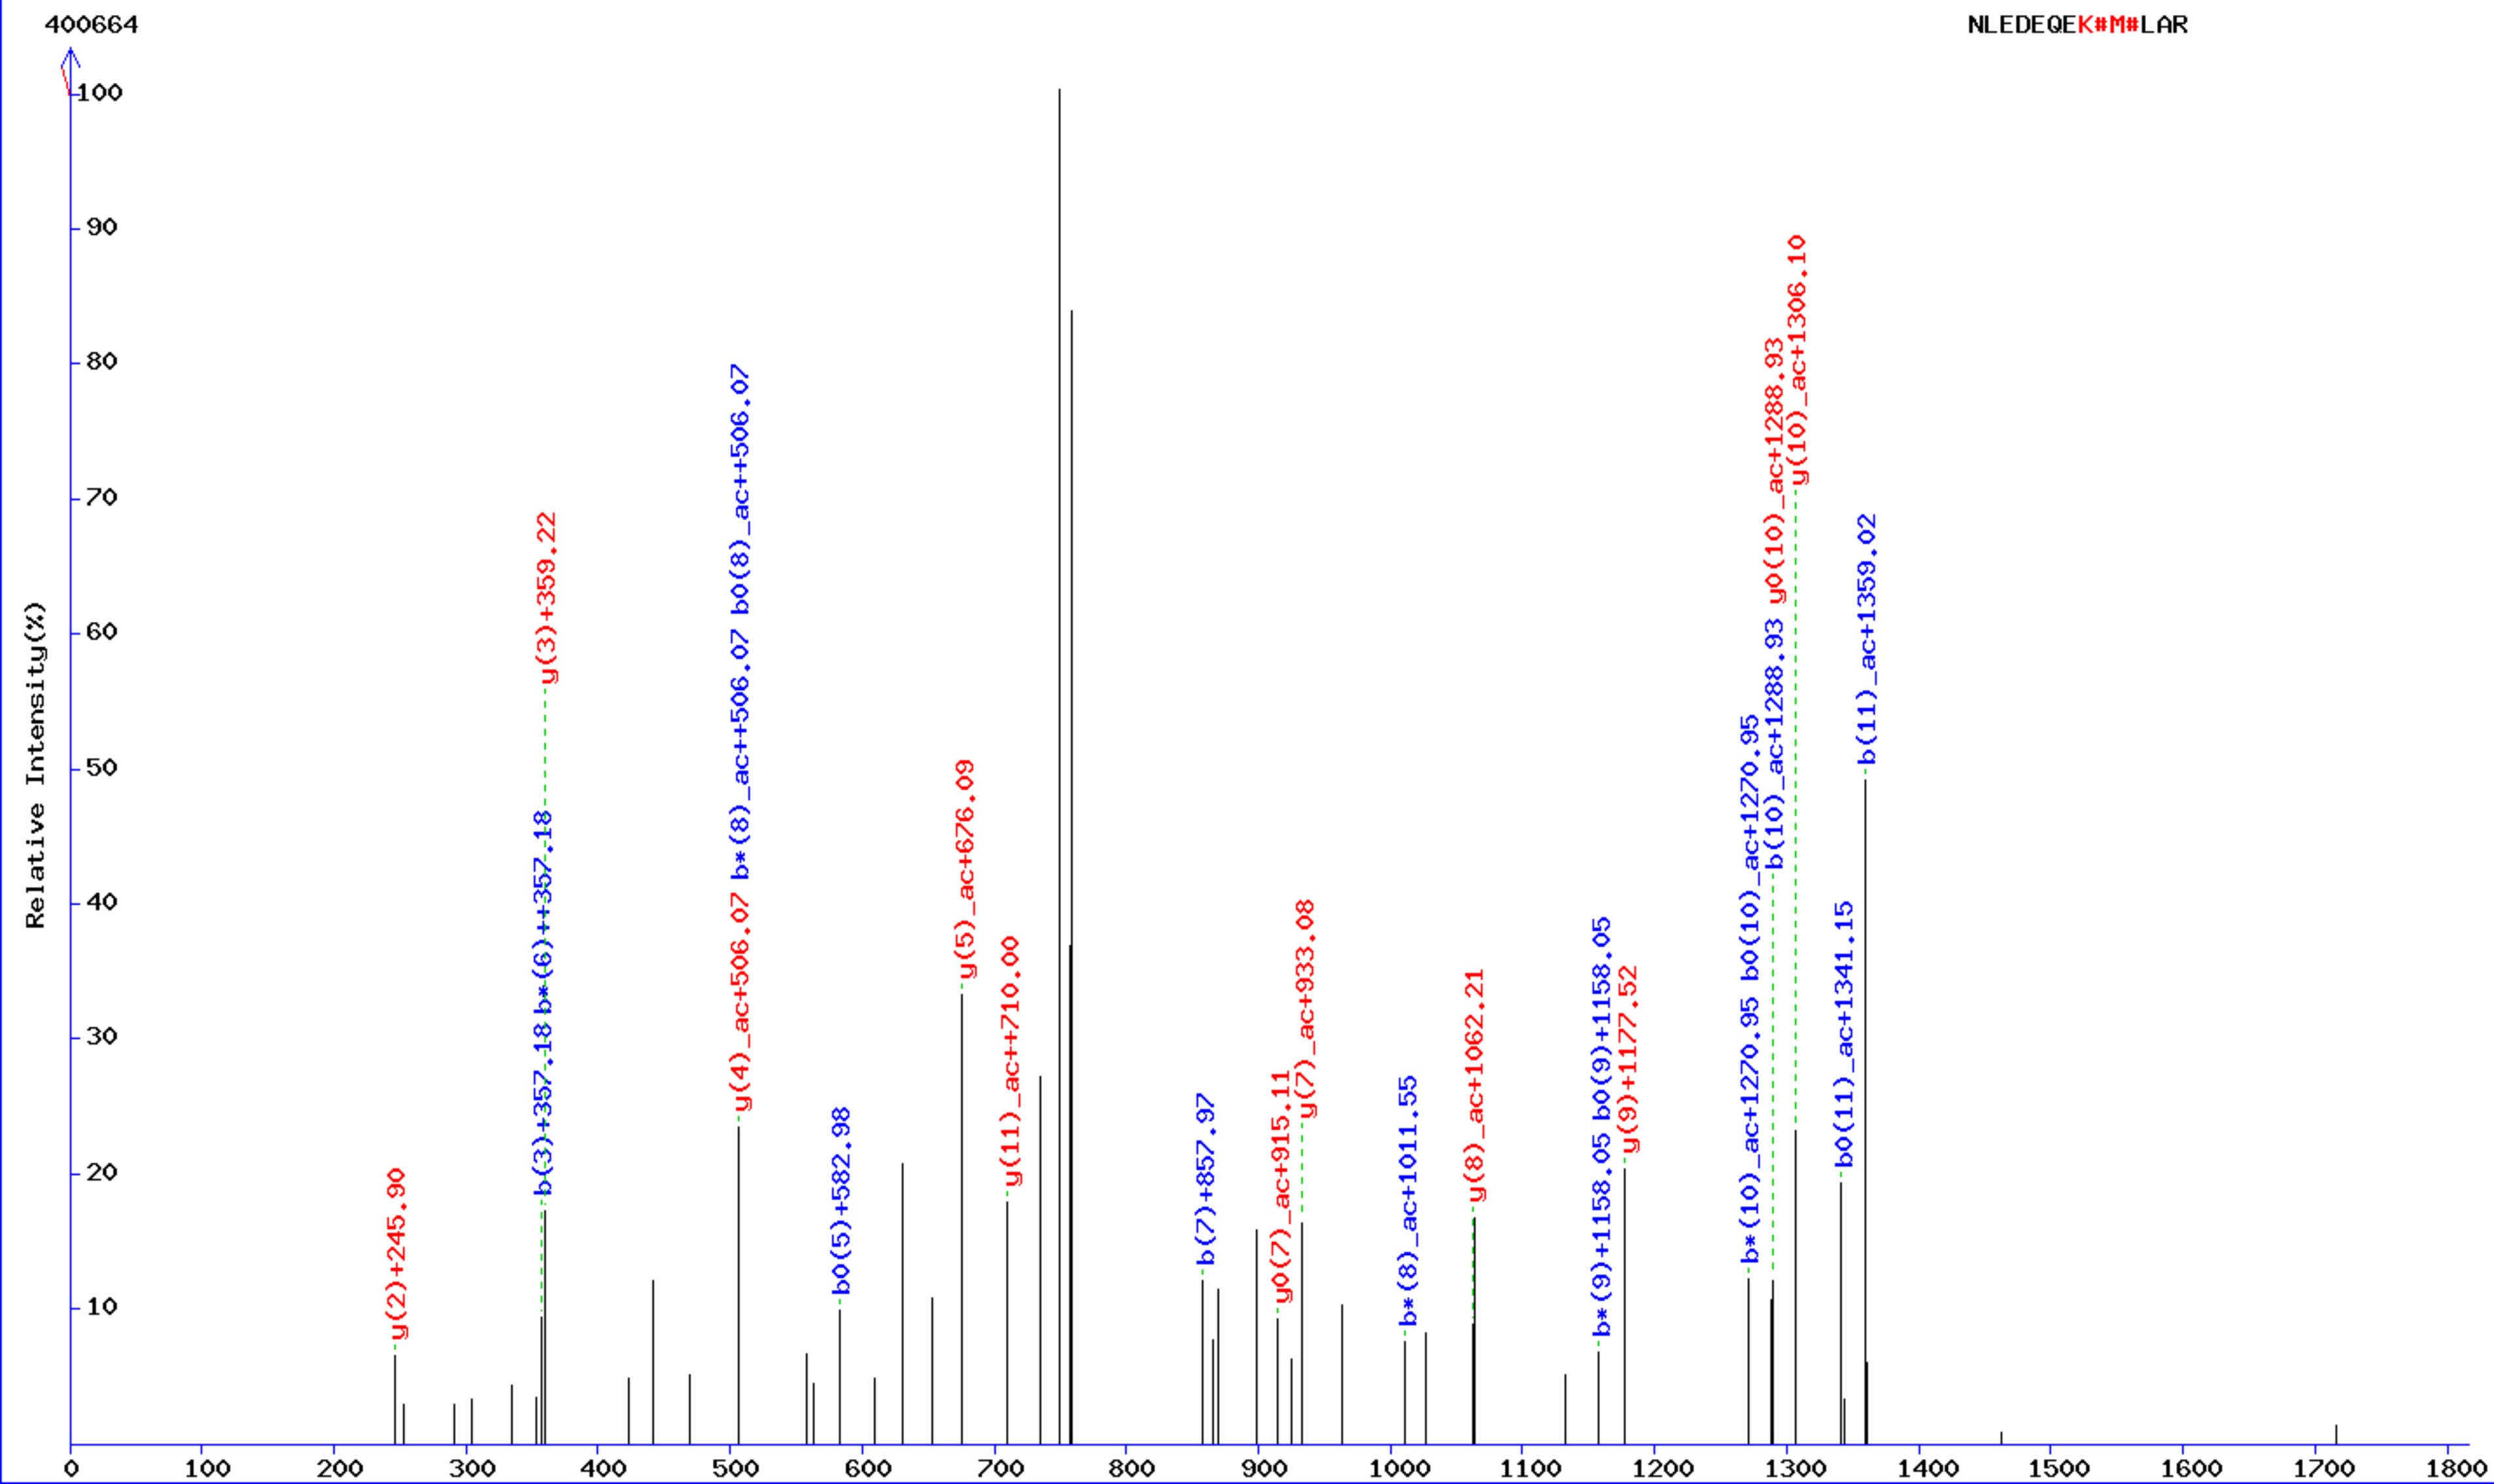

# gi|148660674 MRA\_0904 type II citrate synthase

EAGVK#LMGFGHR

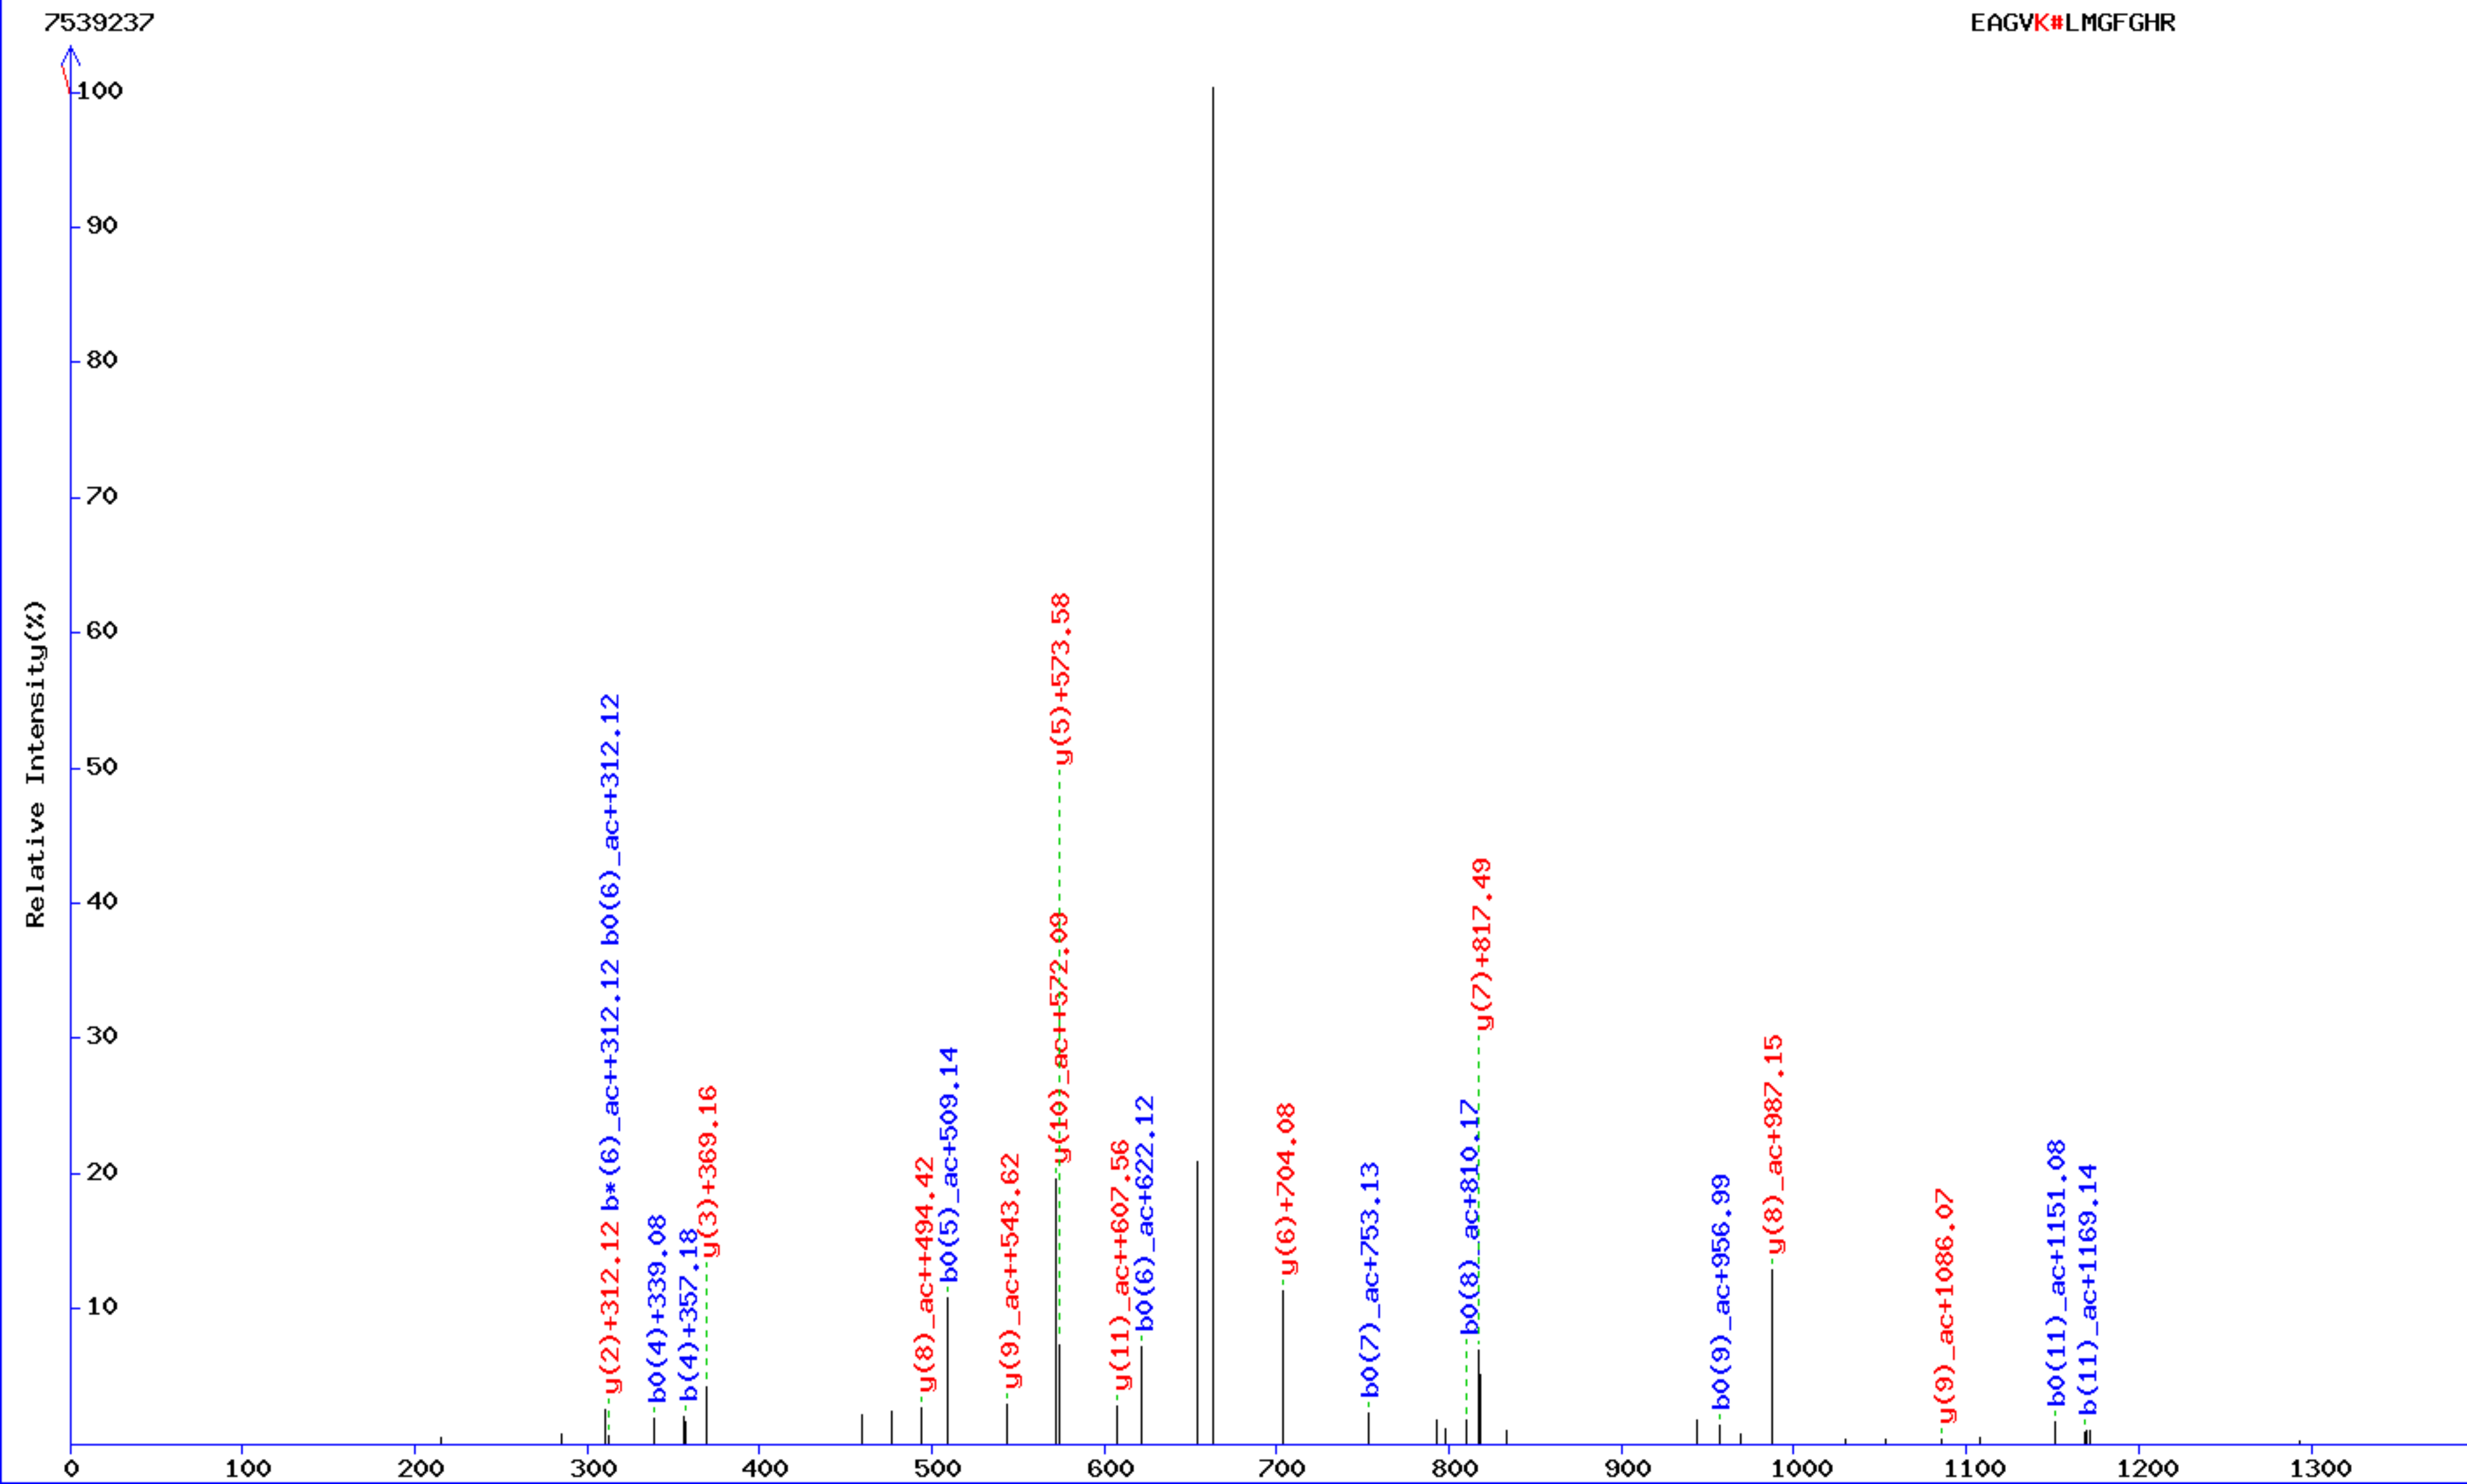

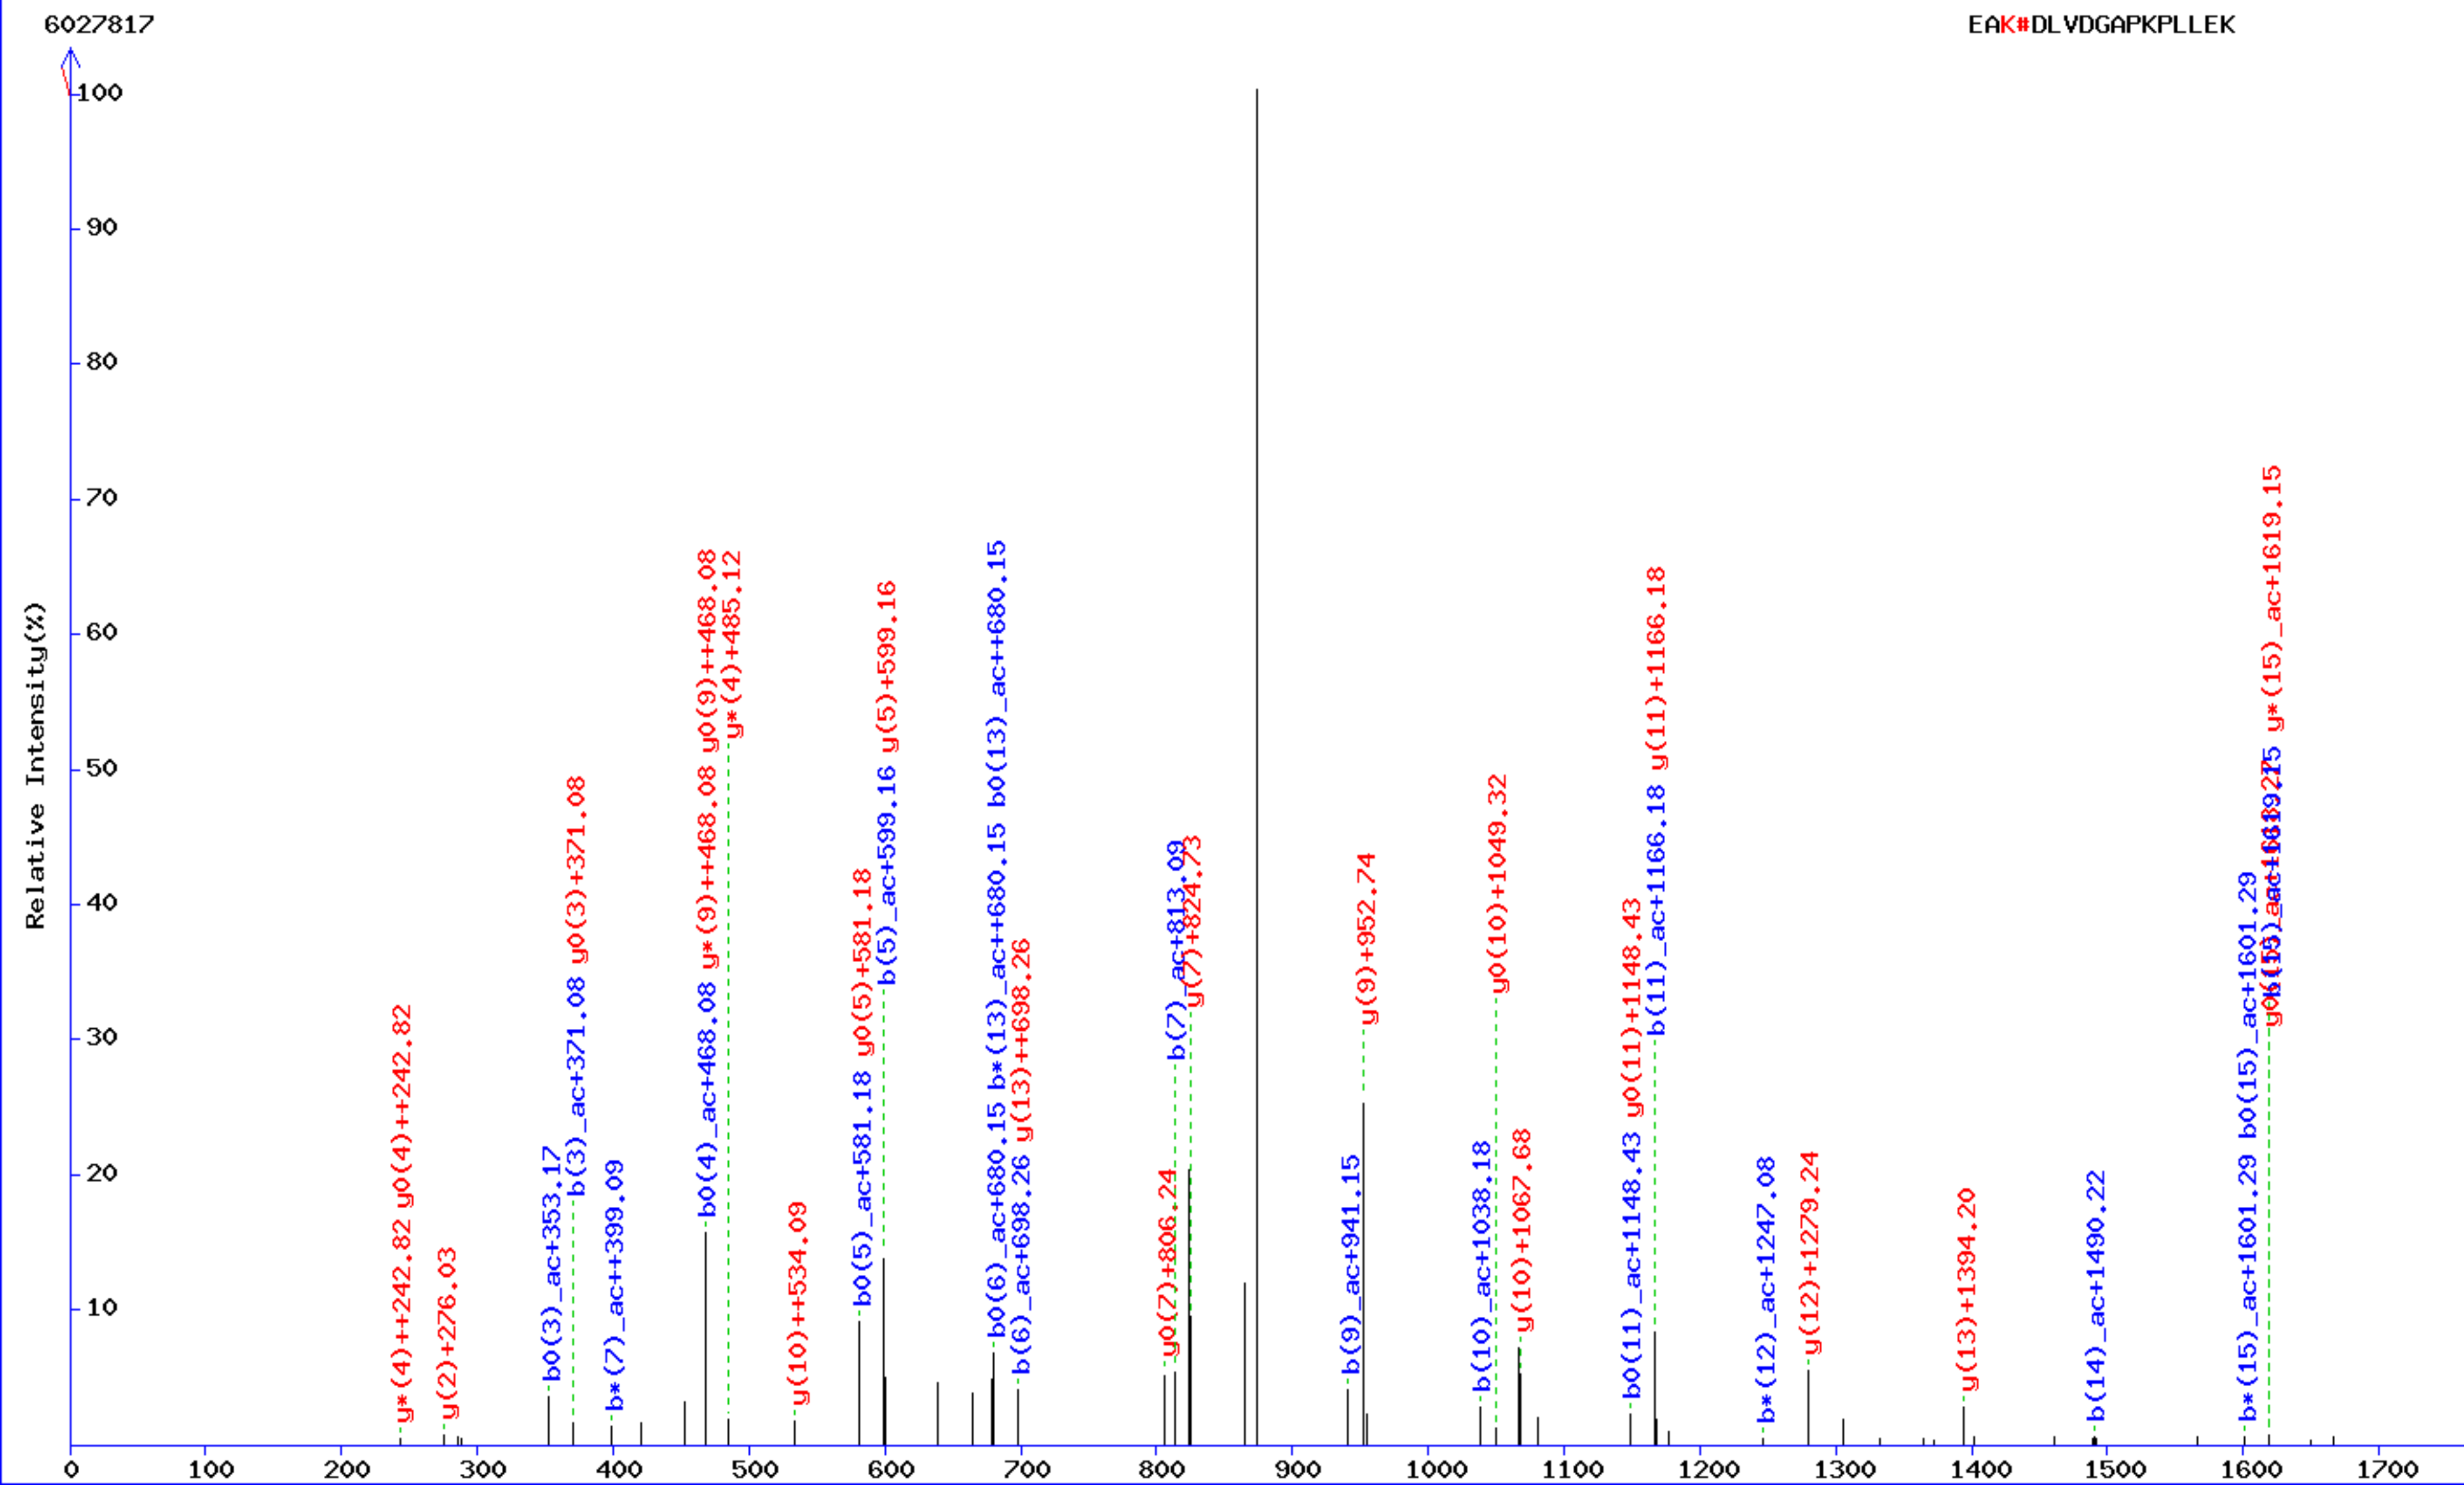

# gi|148660637 MRA\_0868 fatty oxidation complex subunit alpha

GYSEK#LEAK

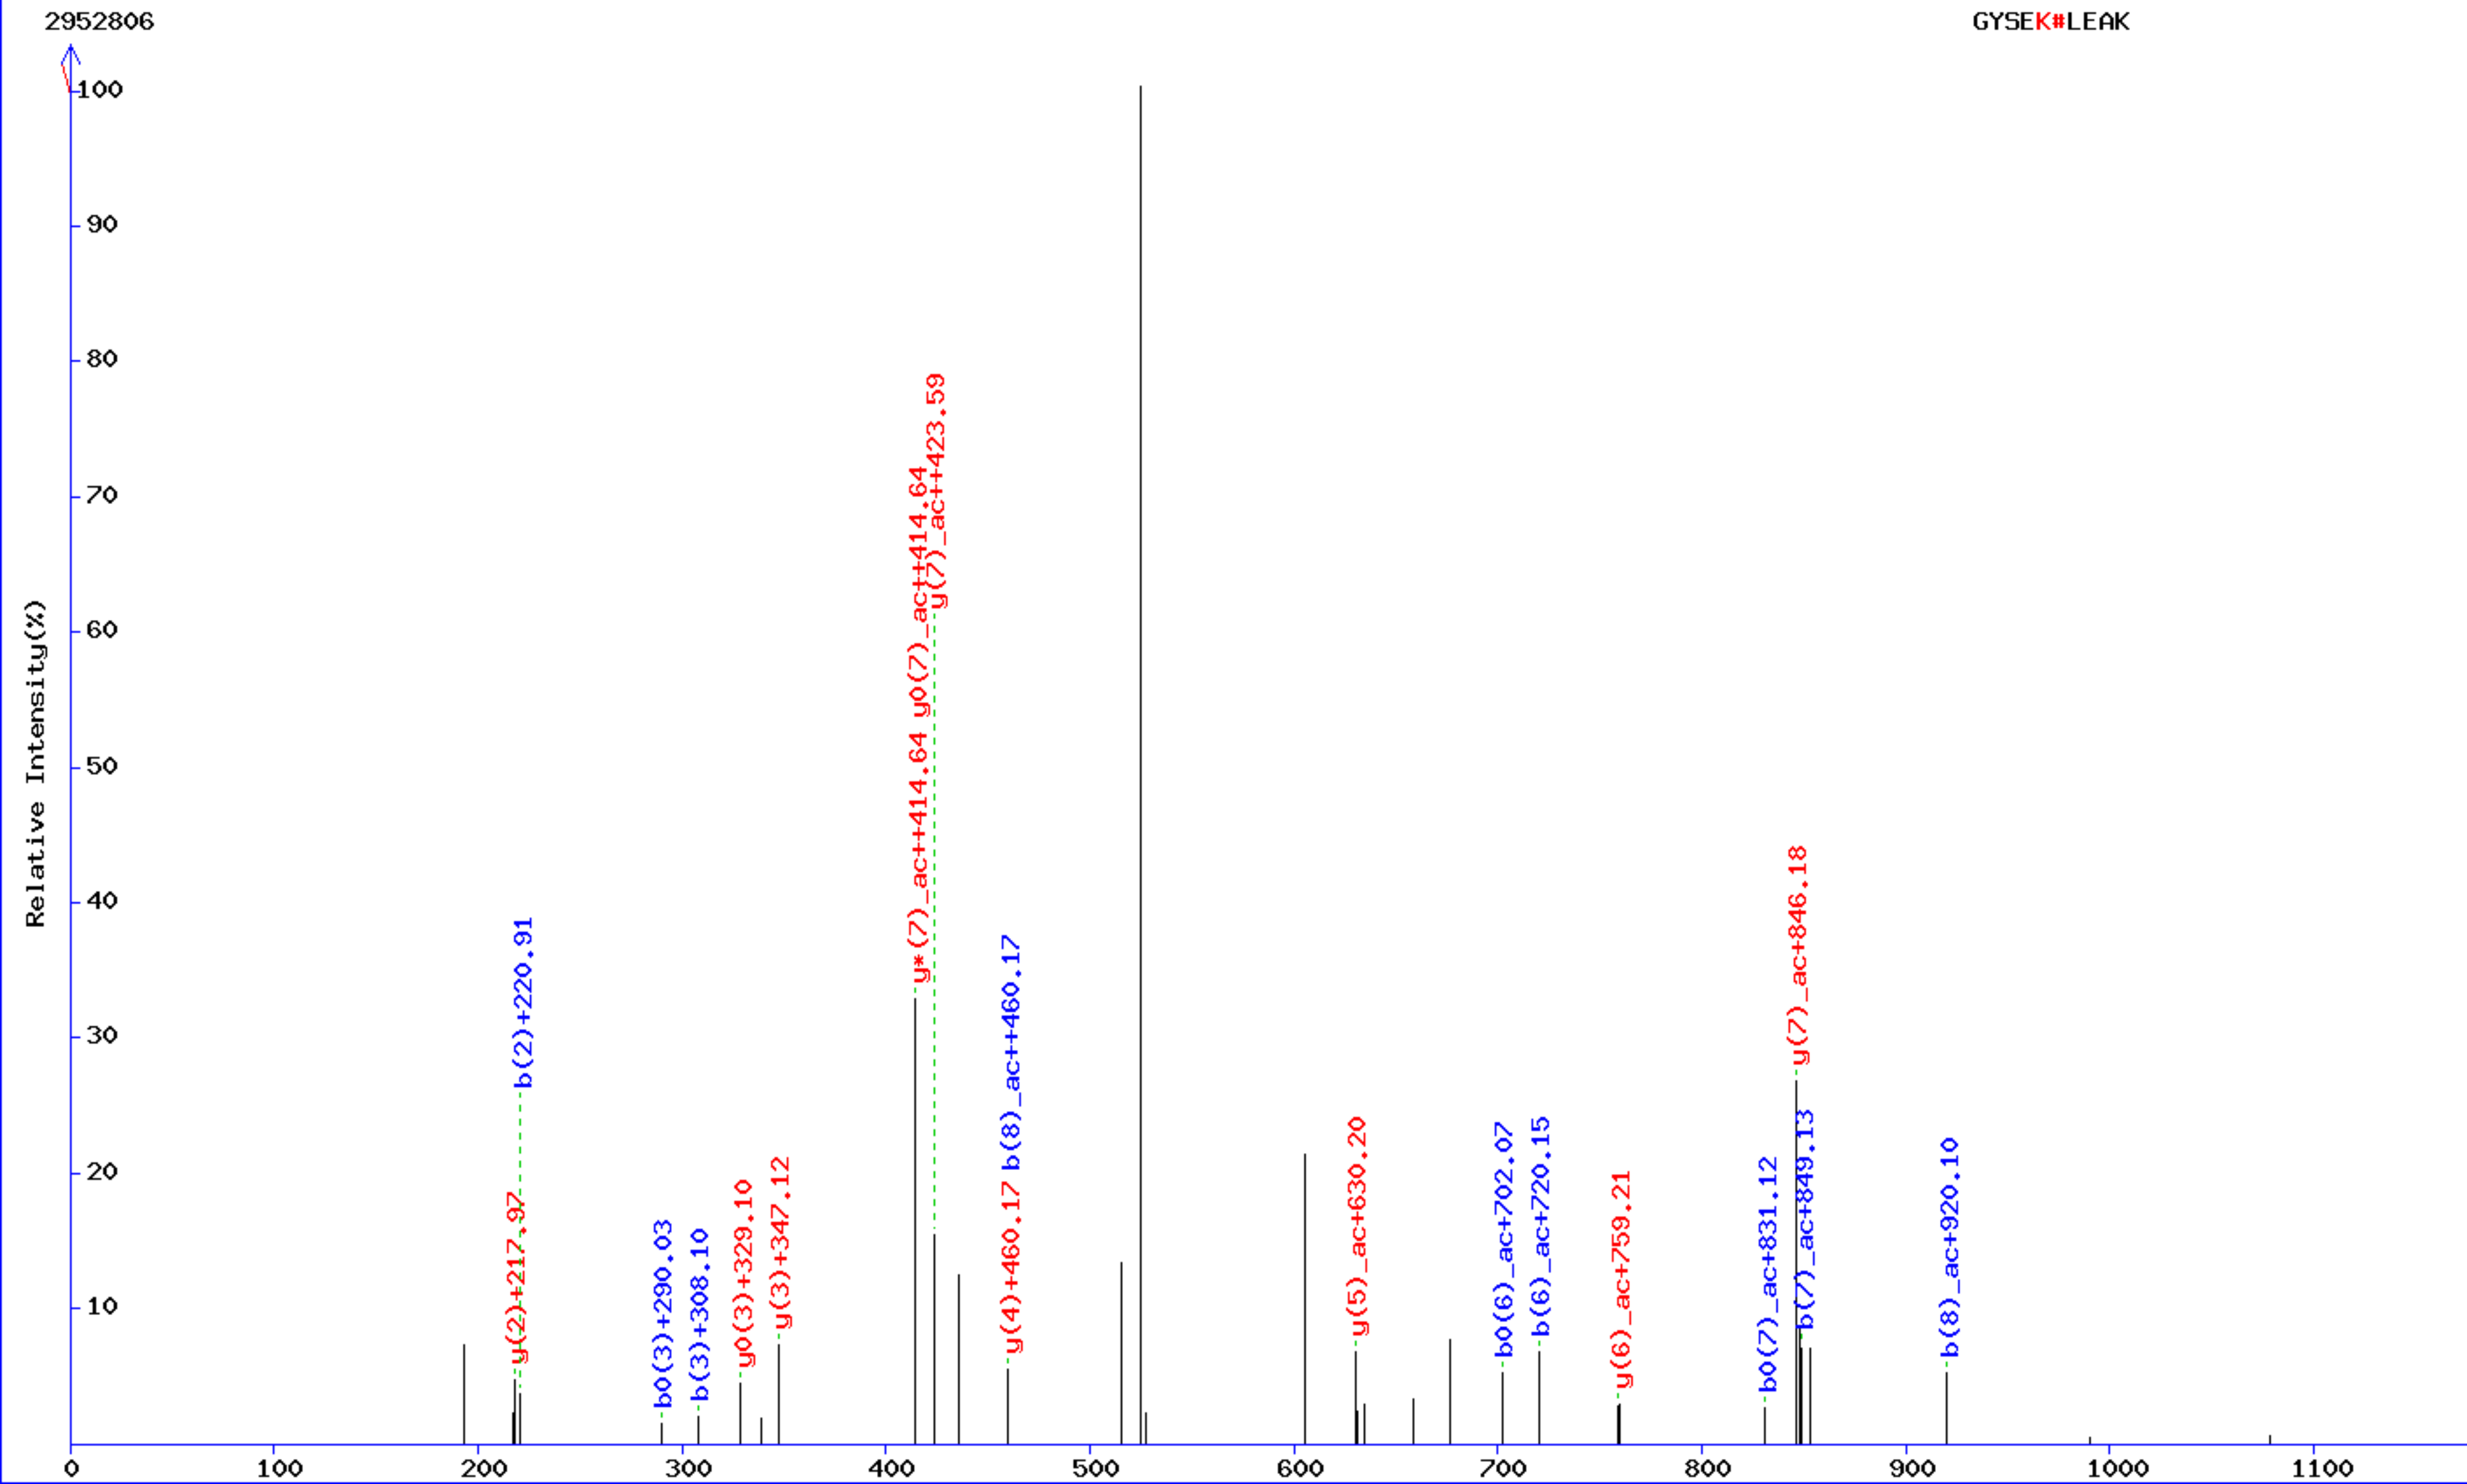

# gi|148660674 MRA\_0904 type II citrate synthase

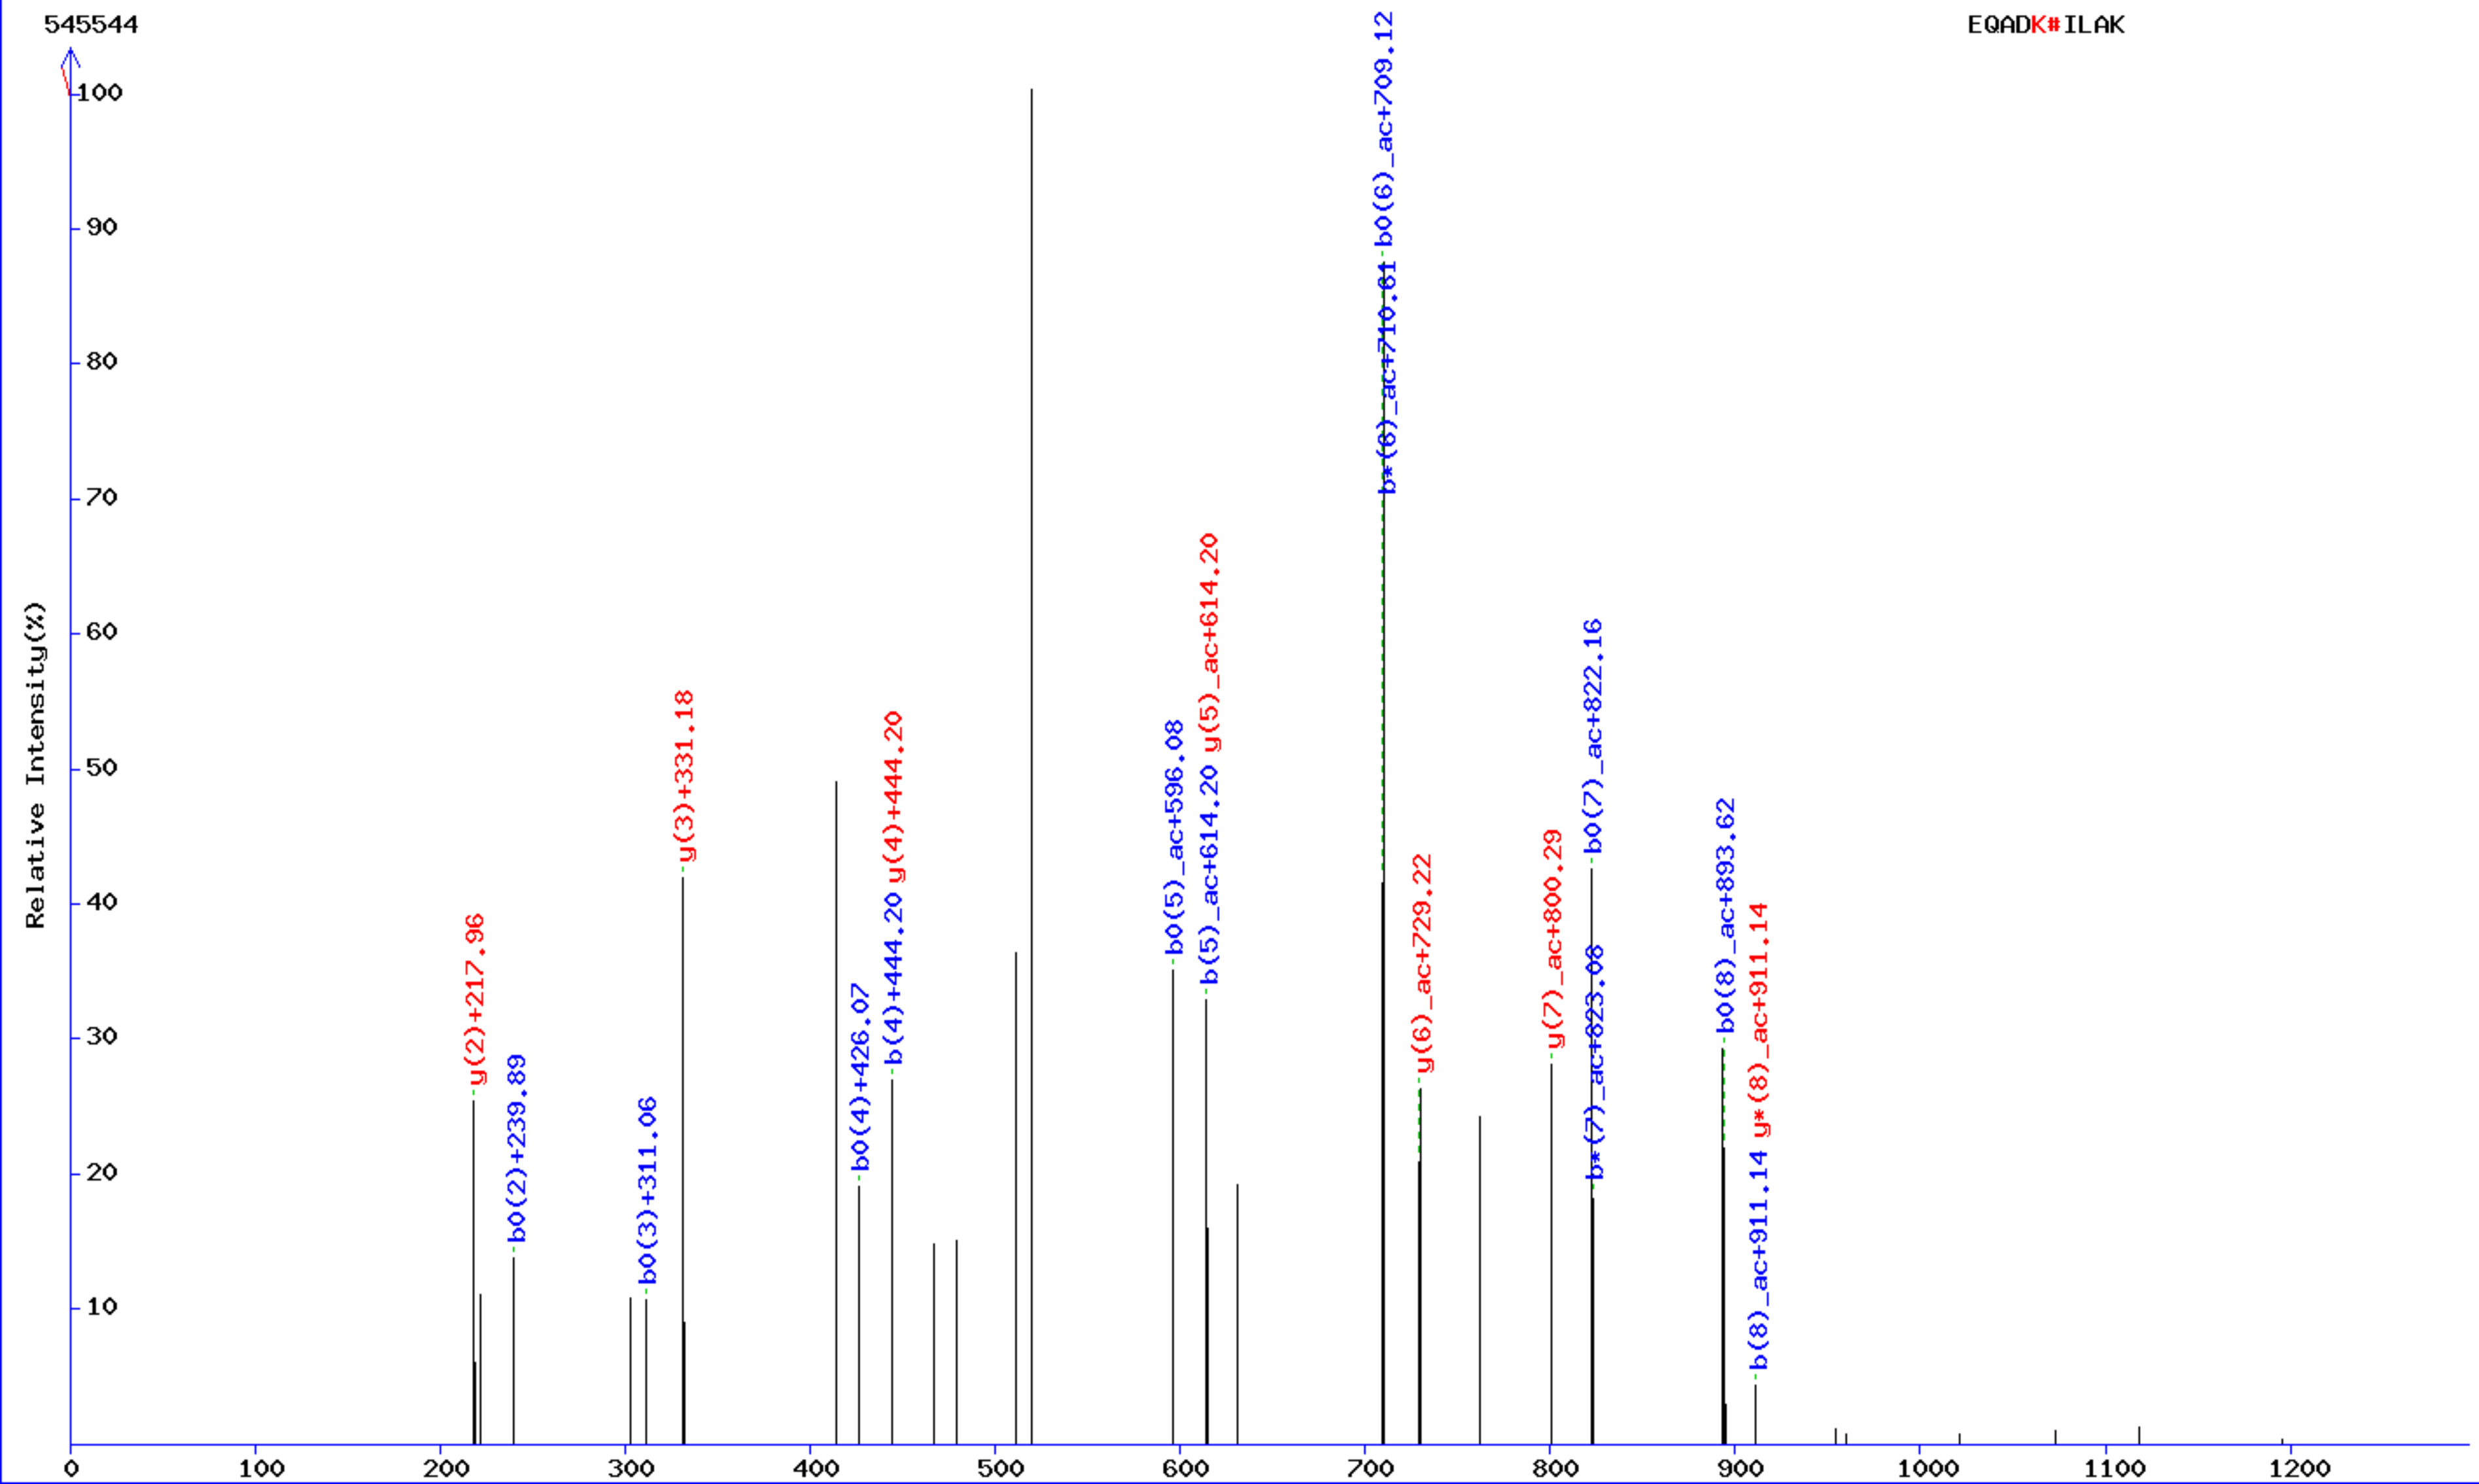

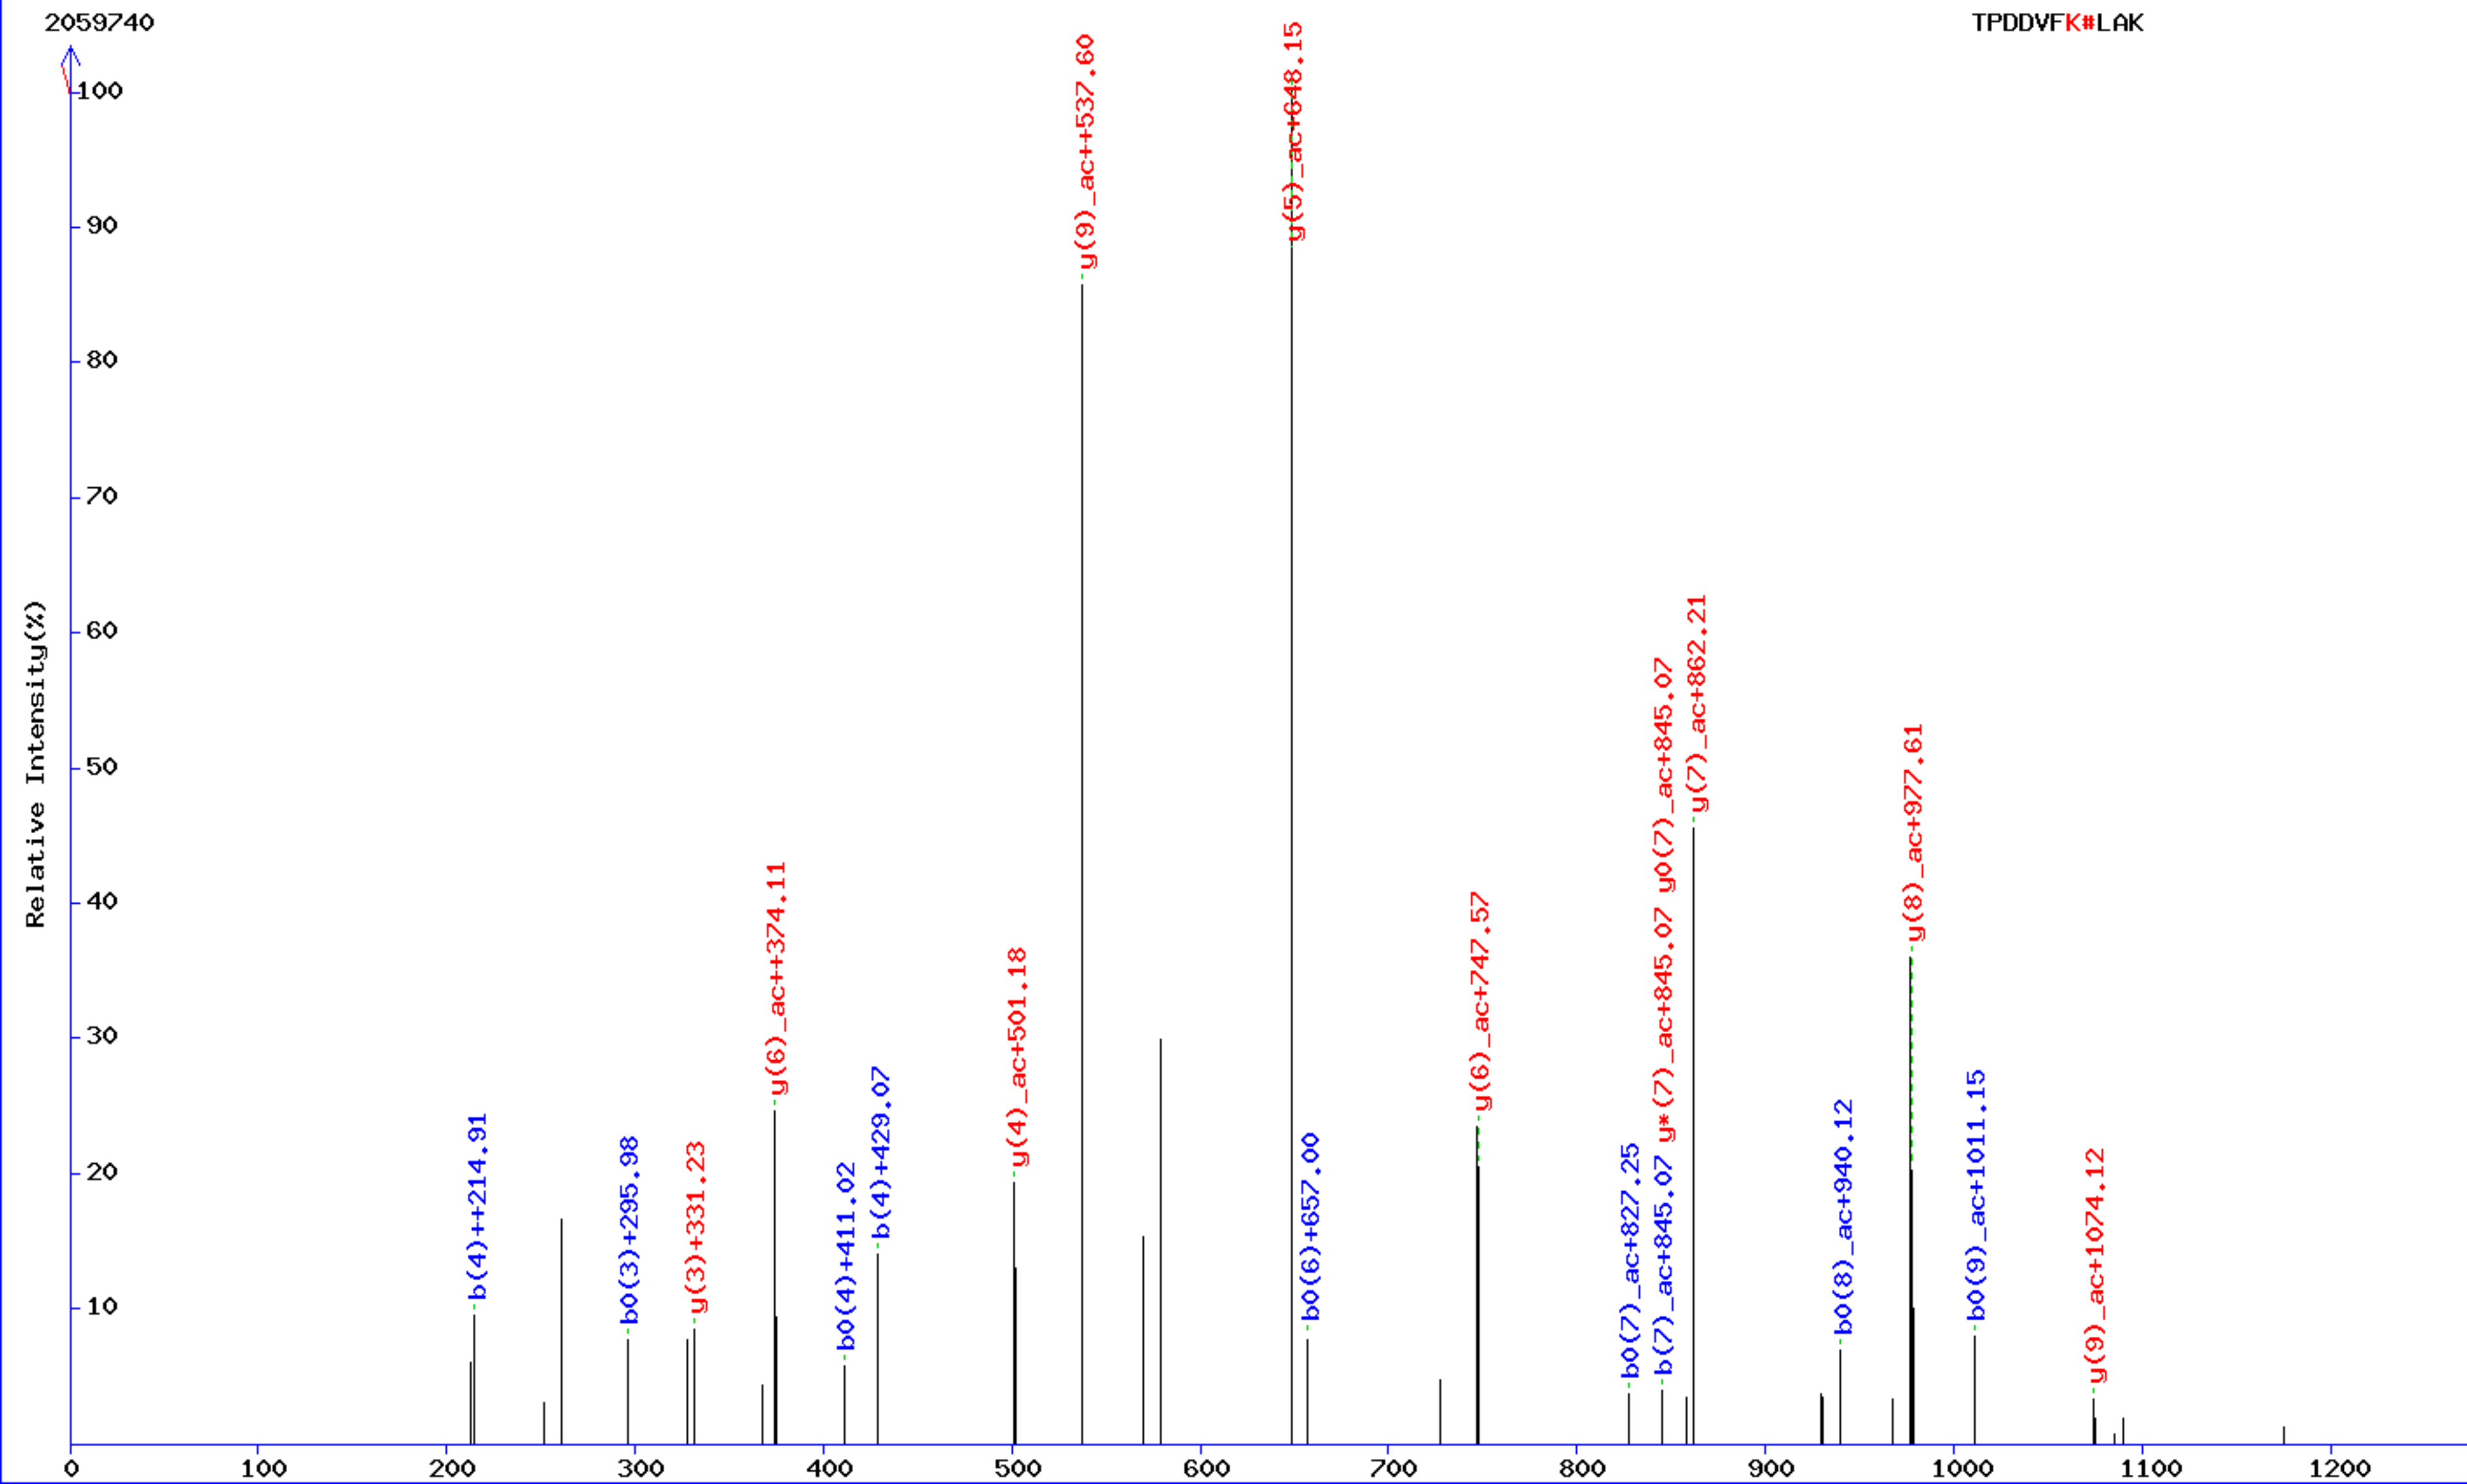



# gi|148663109 MRA\_3287 two component sensory transduction transcriptional regulatory protein MtrA

VEK#DPENPTVVLTVR

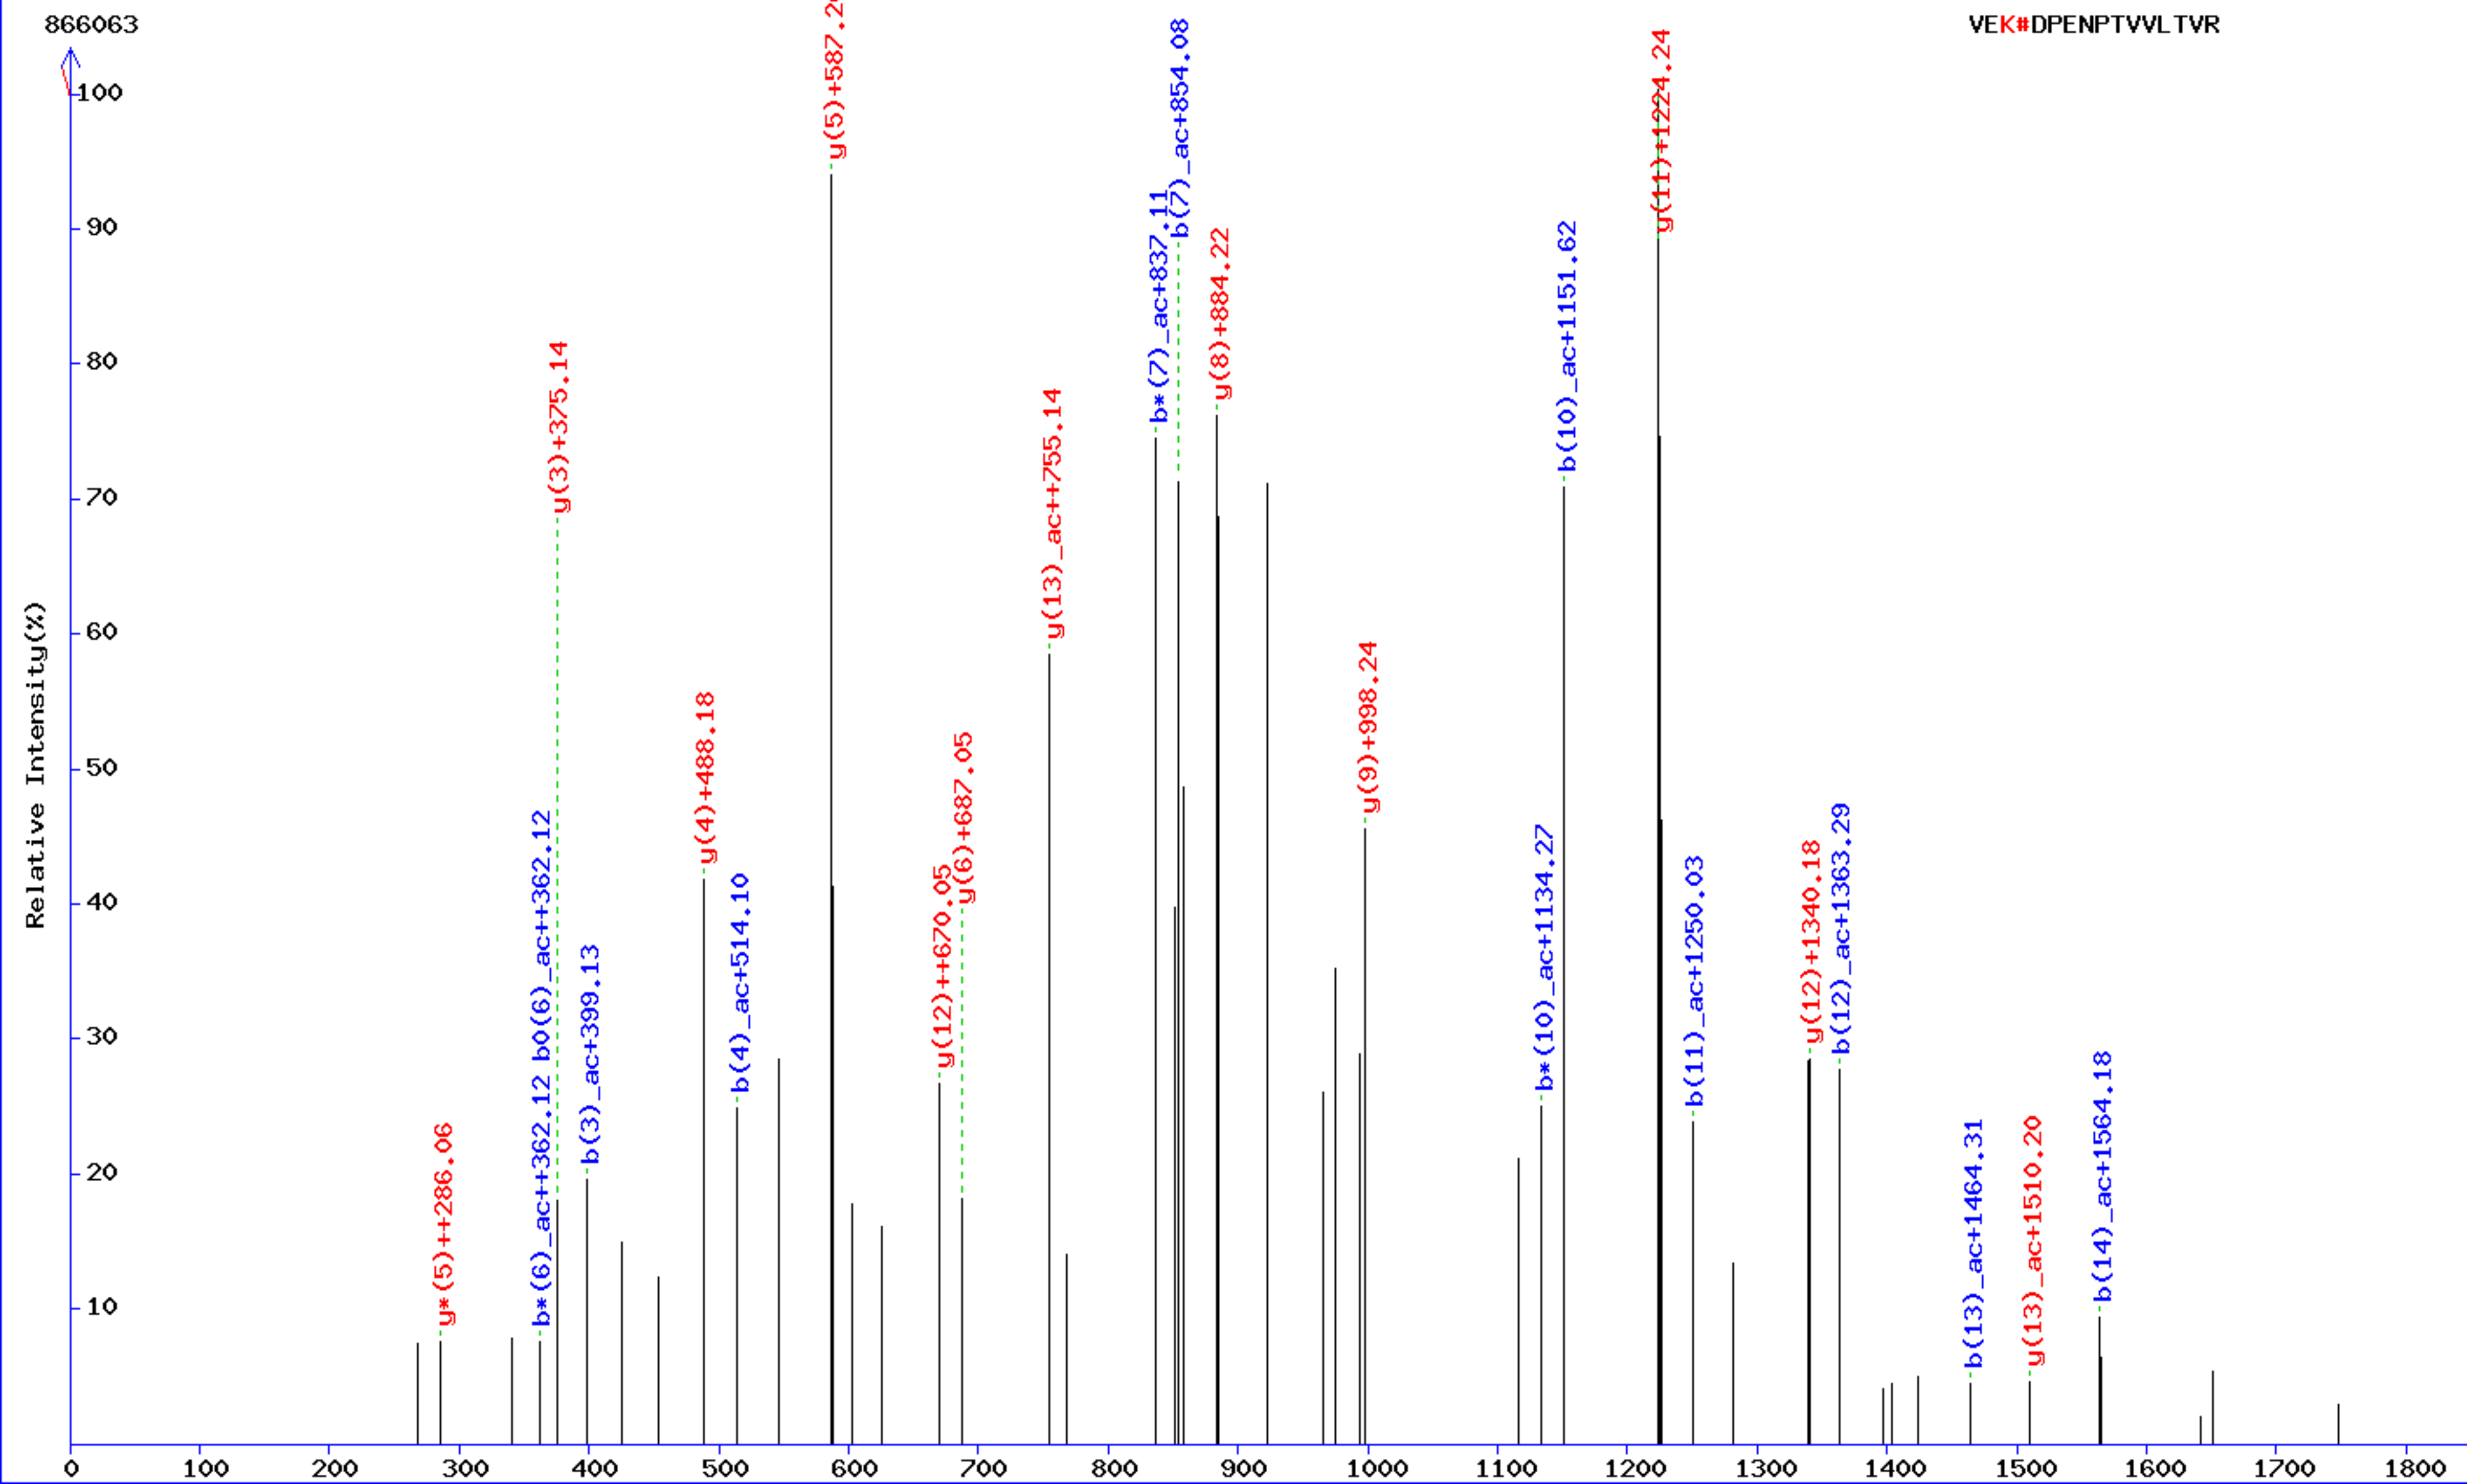

# gi|148663456 MRA\_3631 hypothetical protein

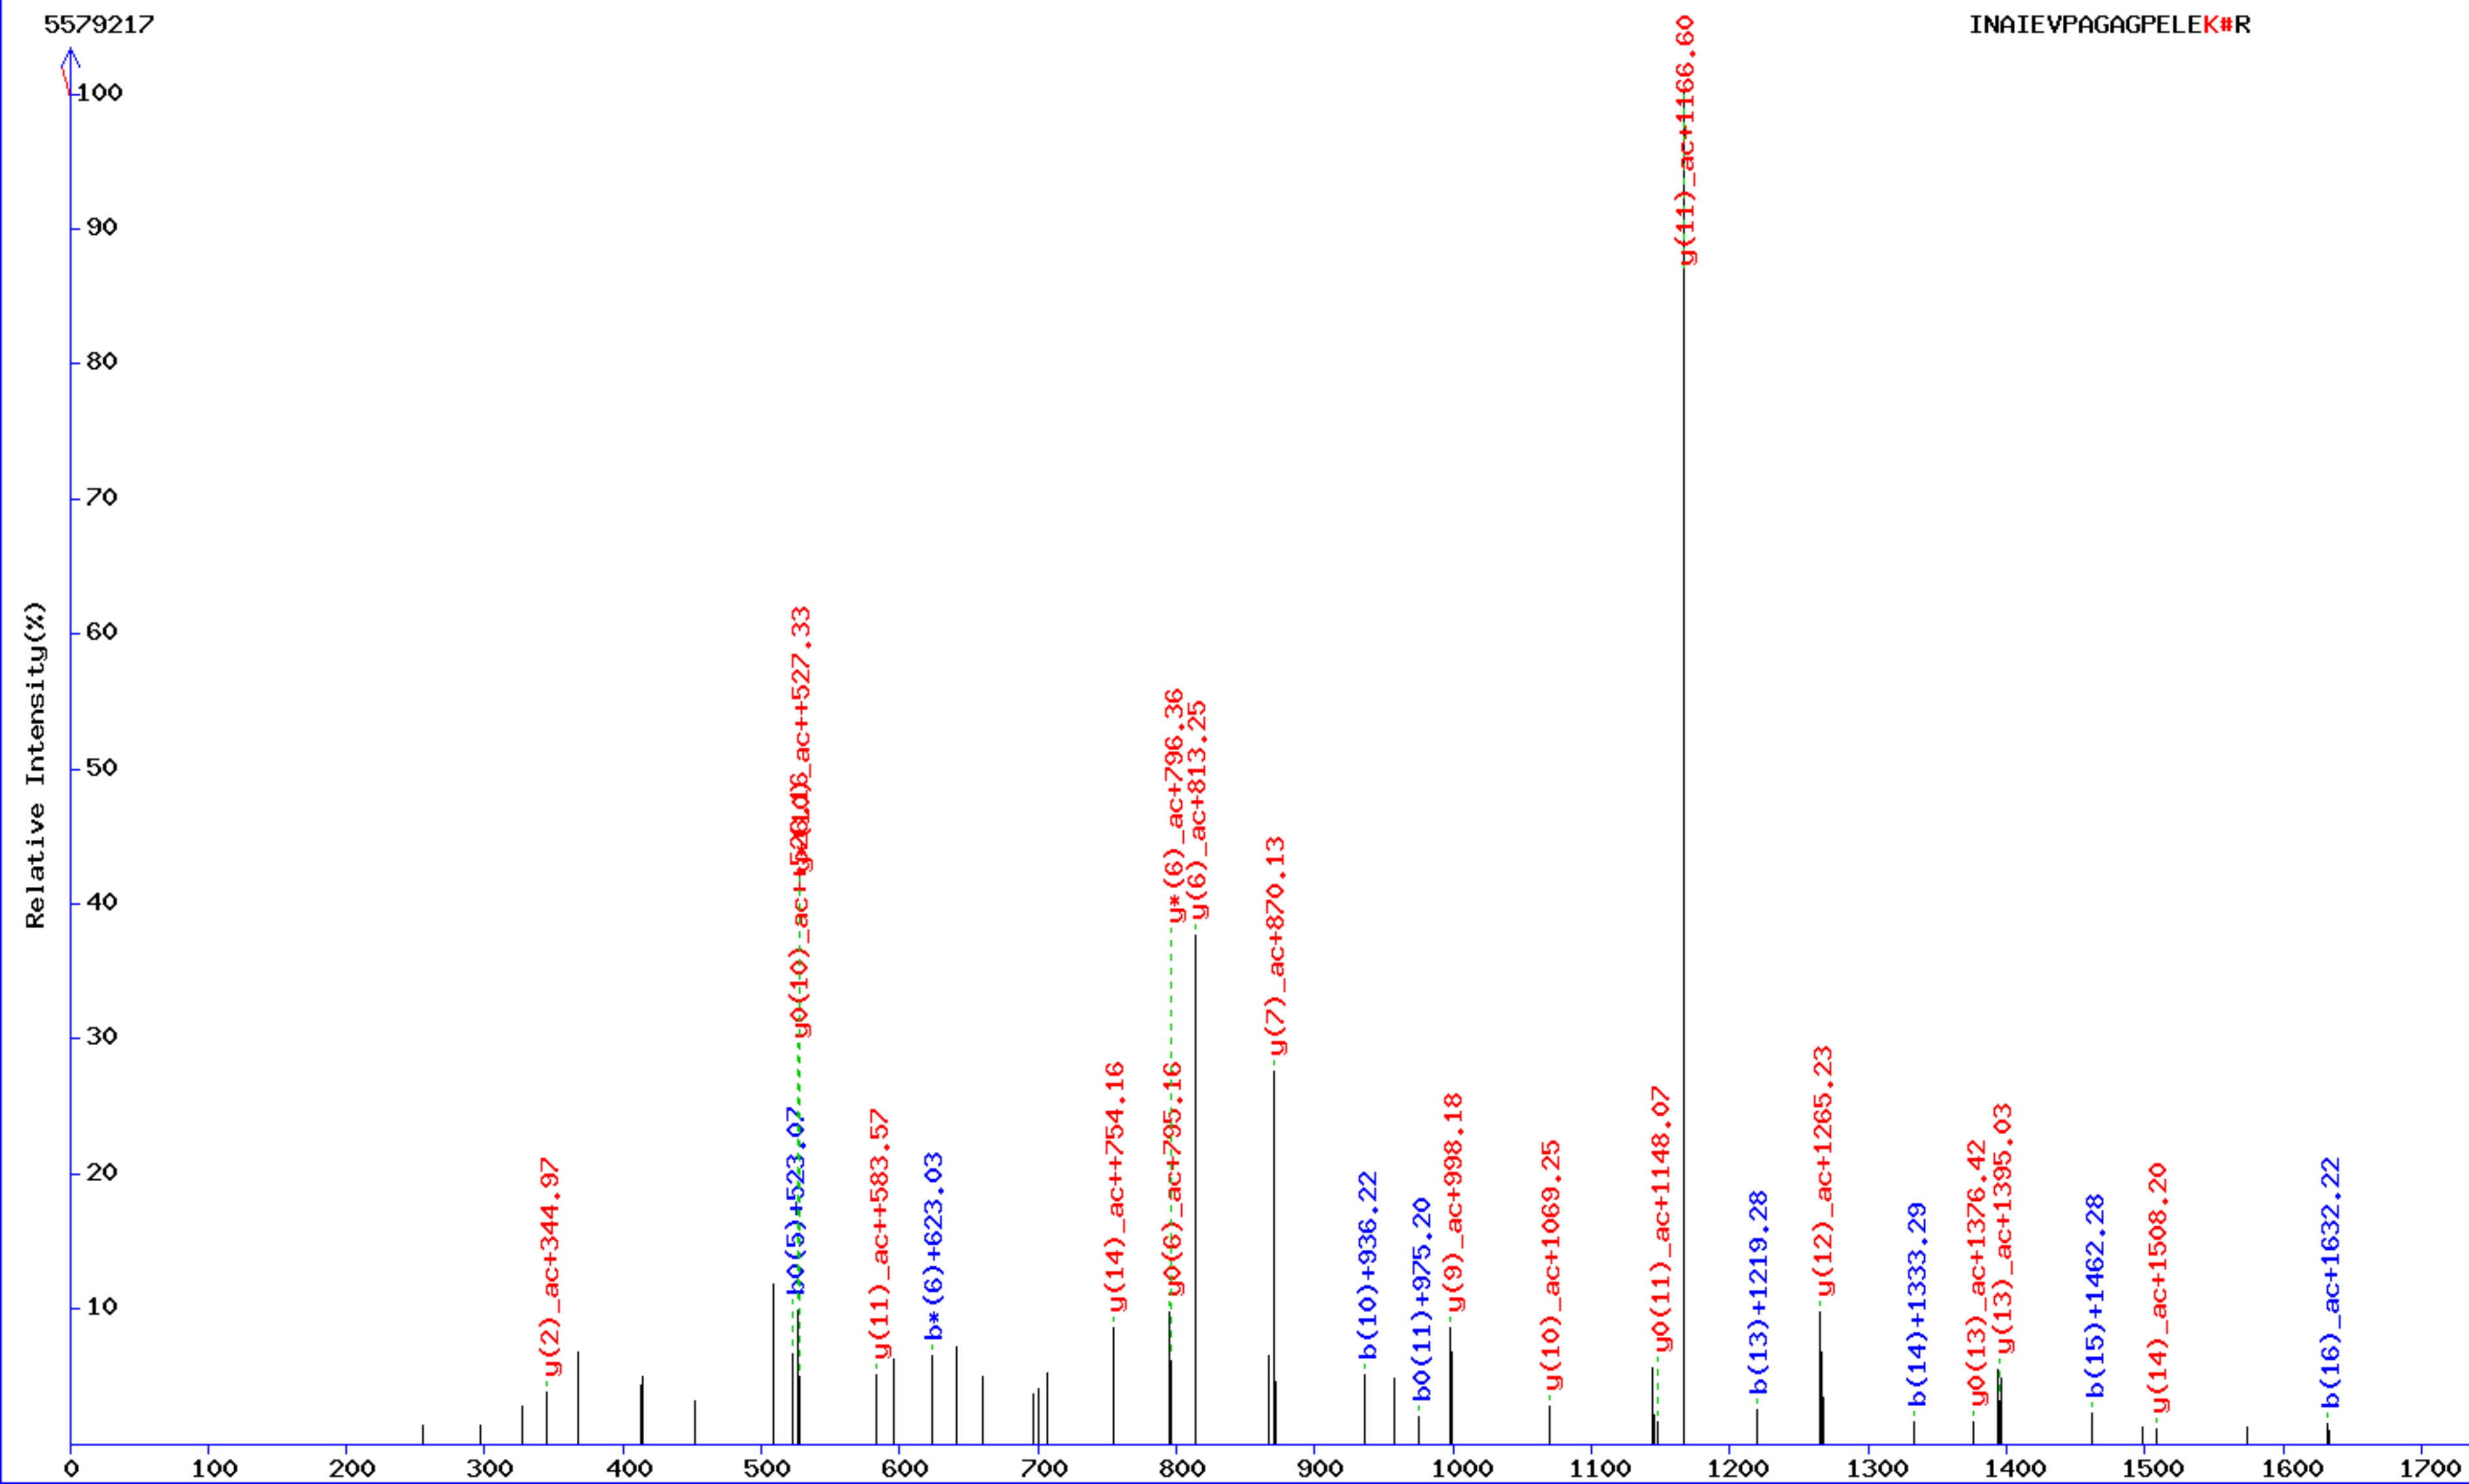

# gi|148660035 MRA\_0278 acyl-CoA synthetase

ILDQLEK#TEPKPDLSSLK

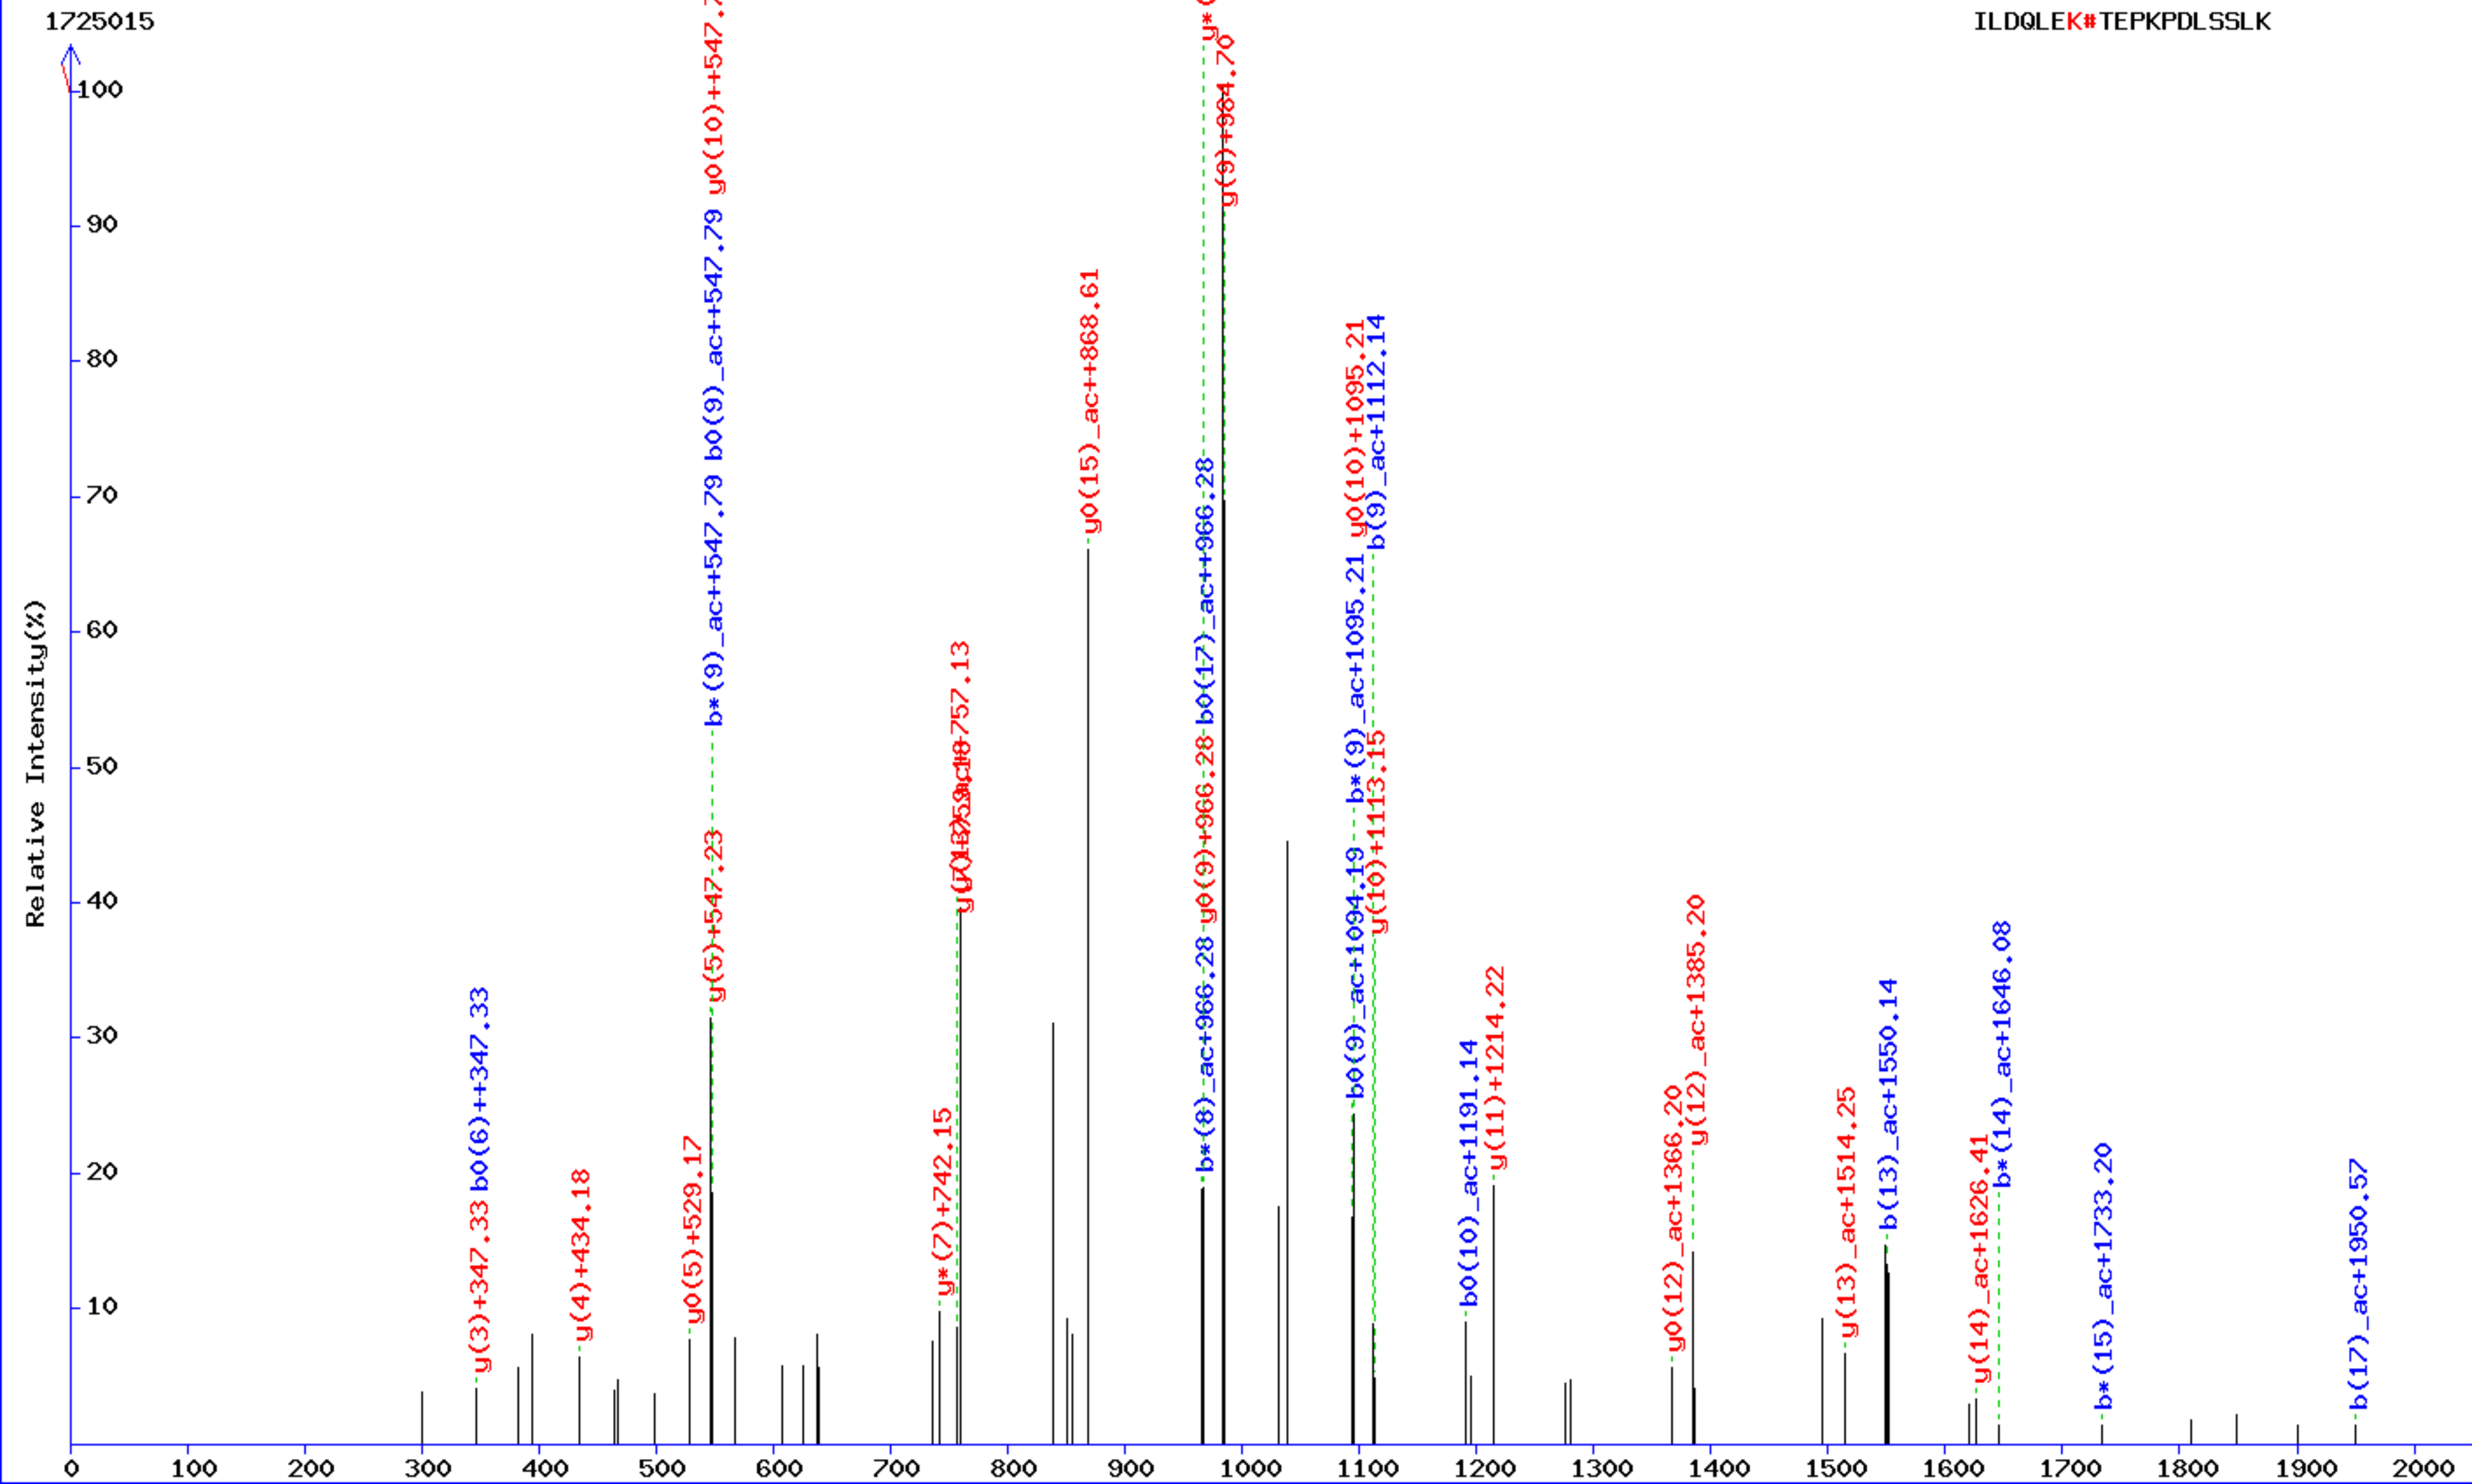

# gi|14865921 MRA\_0165 NAD(P) transhydrogenase subunit beta

SIPAIVAGGFGGGGVAPSGGGDDK#HVK

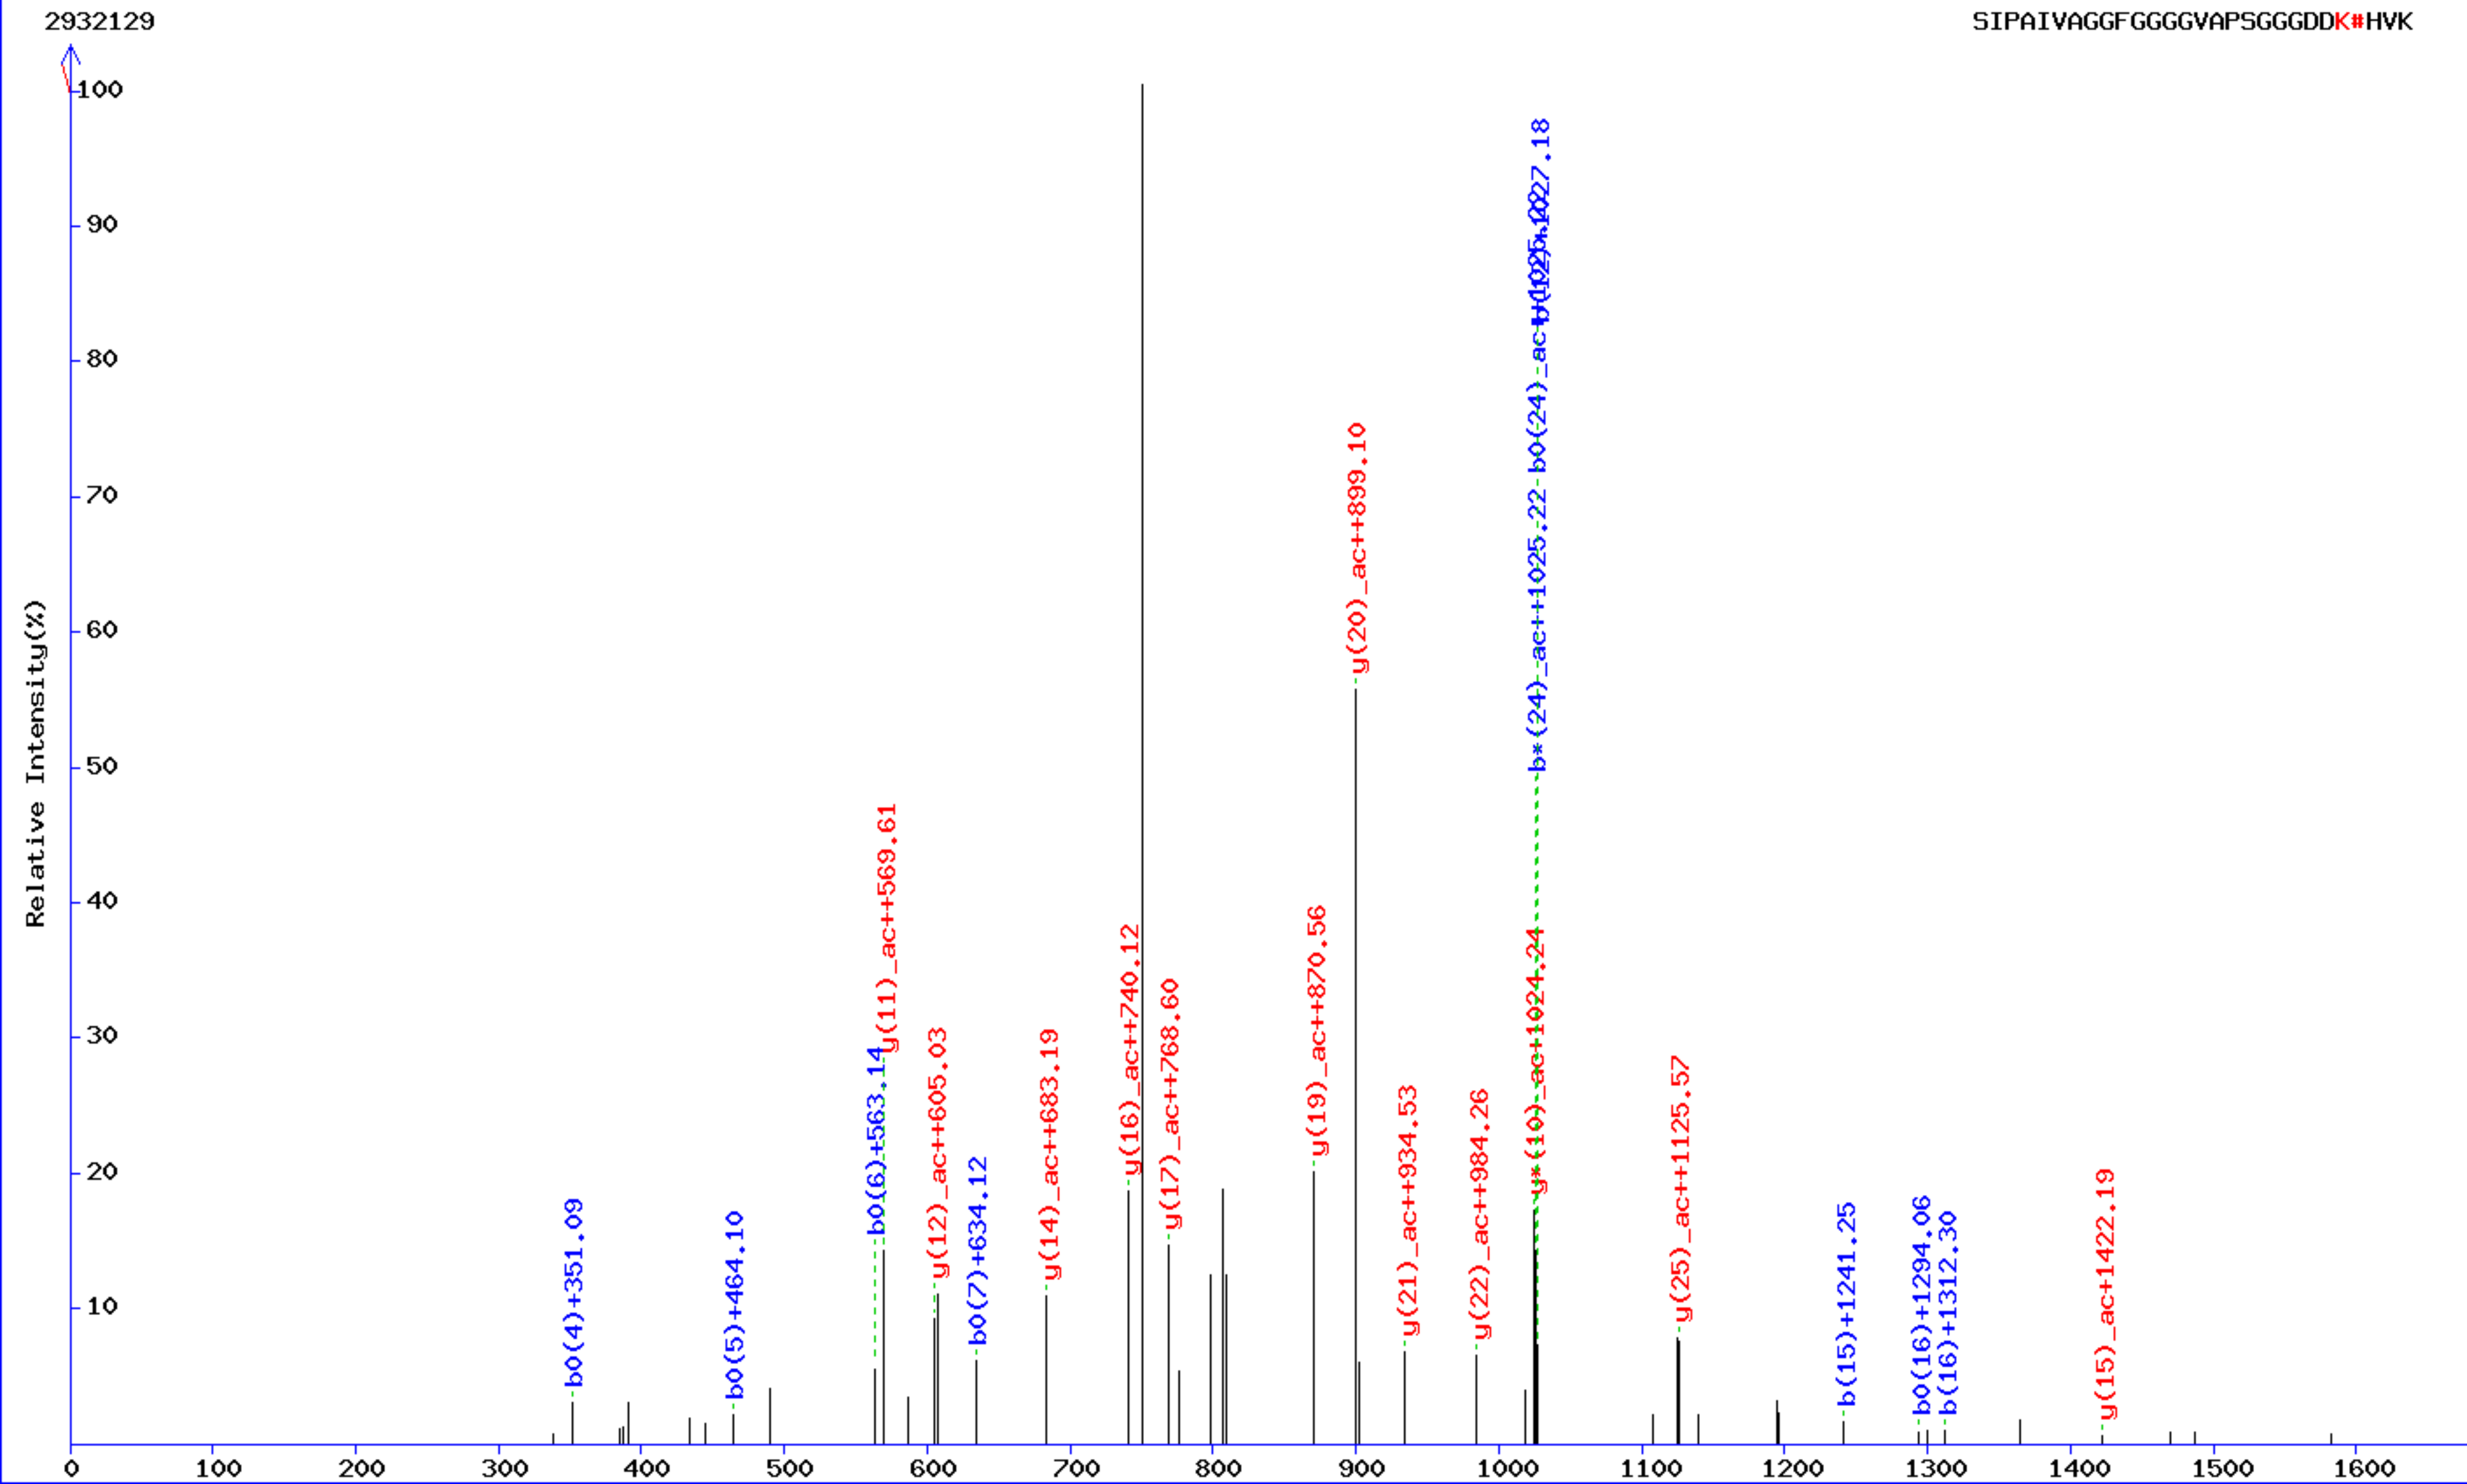

# gi|148661961 MRA\_2160 hypothetical protein

PLTPADVHNVAFSK#PPIGK

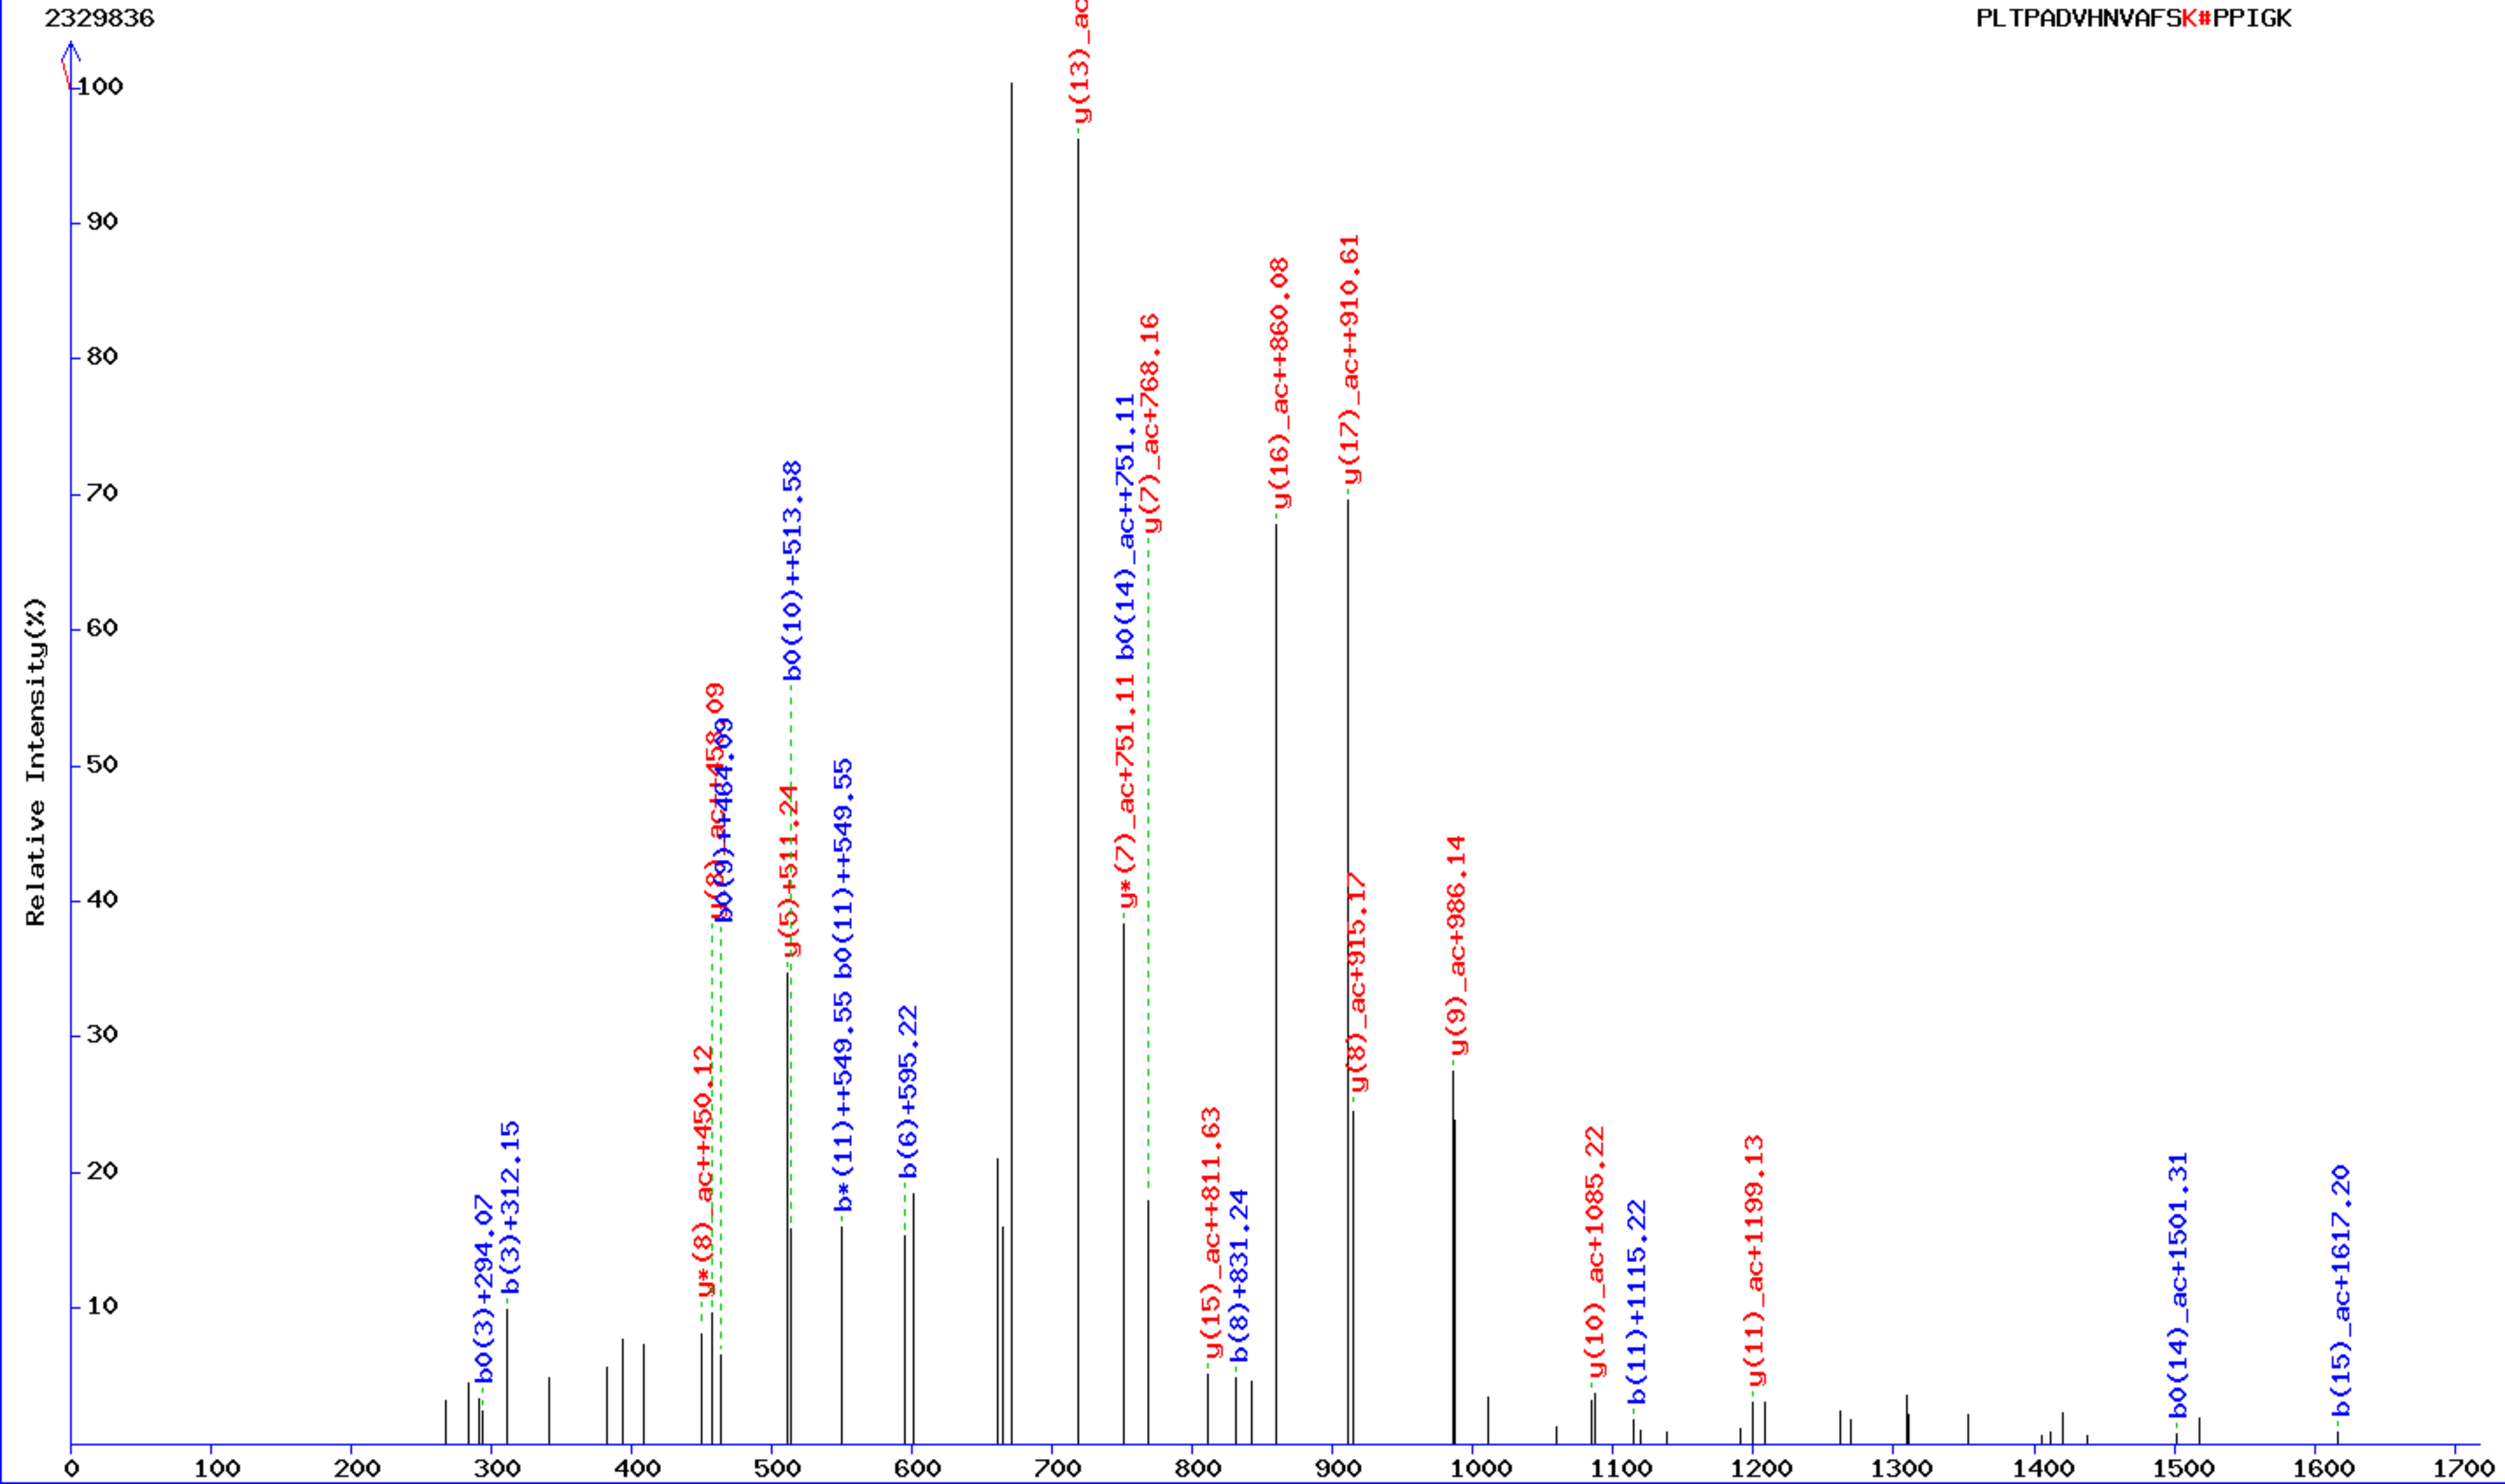

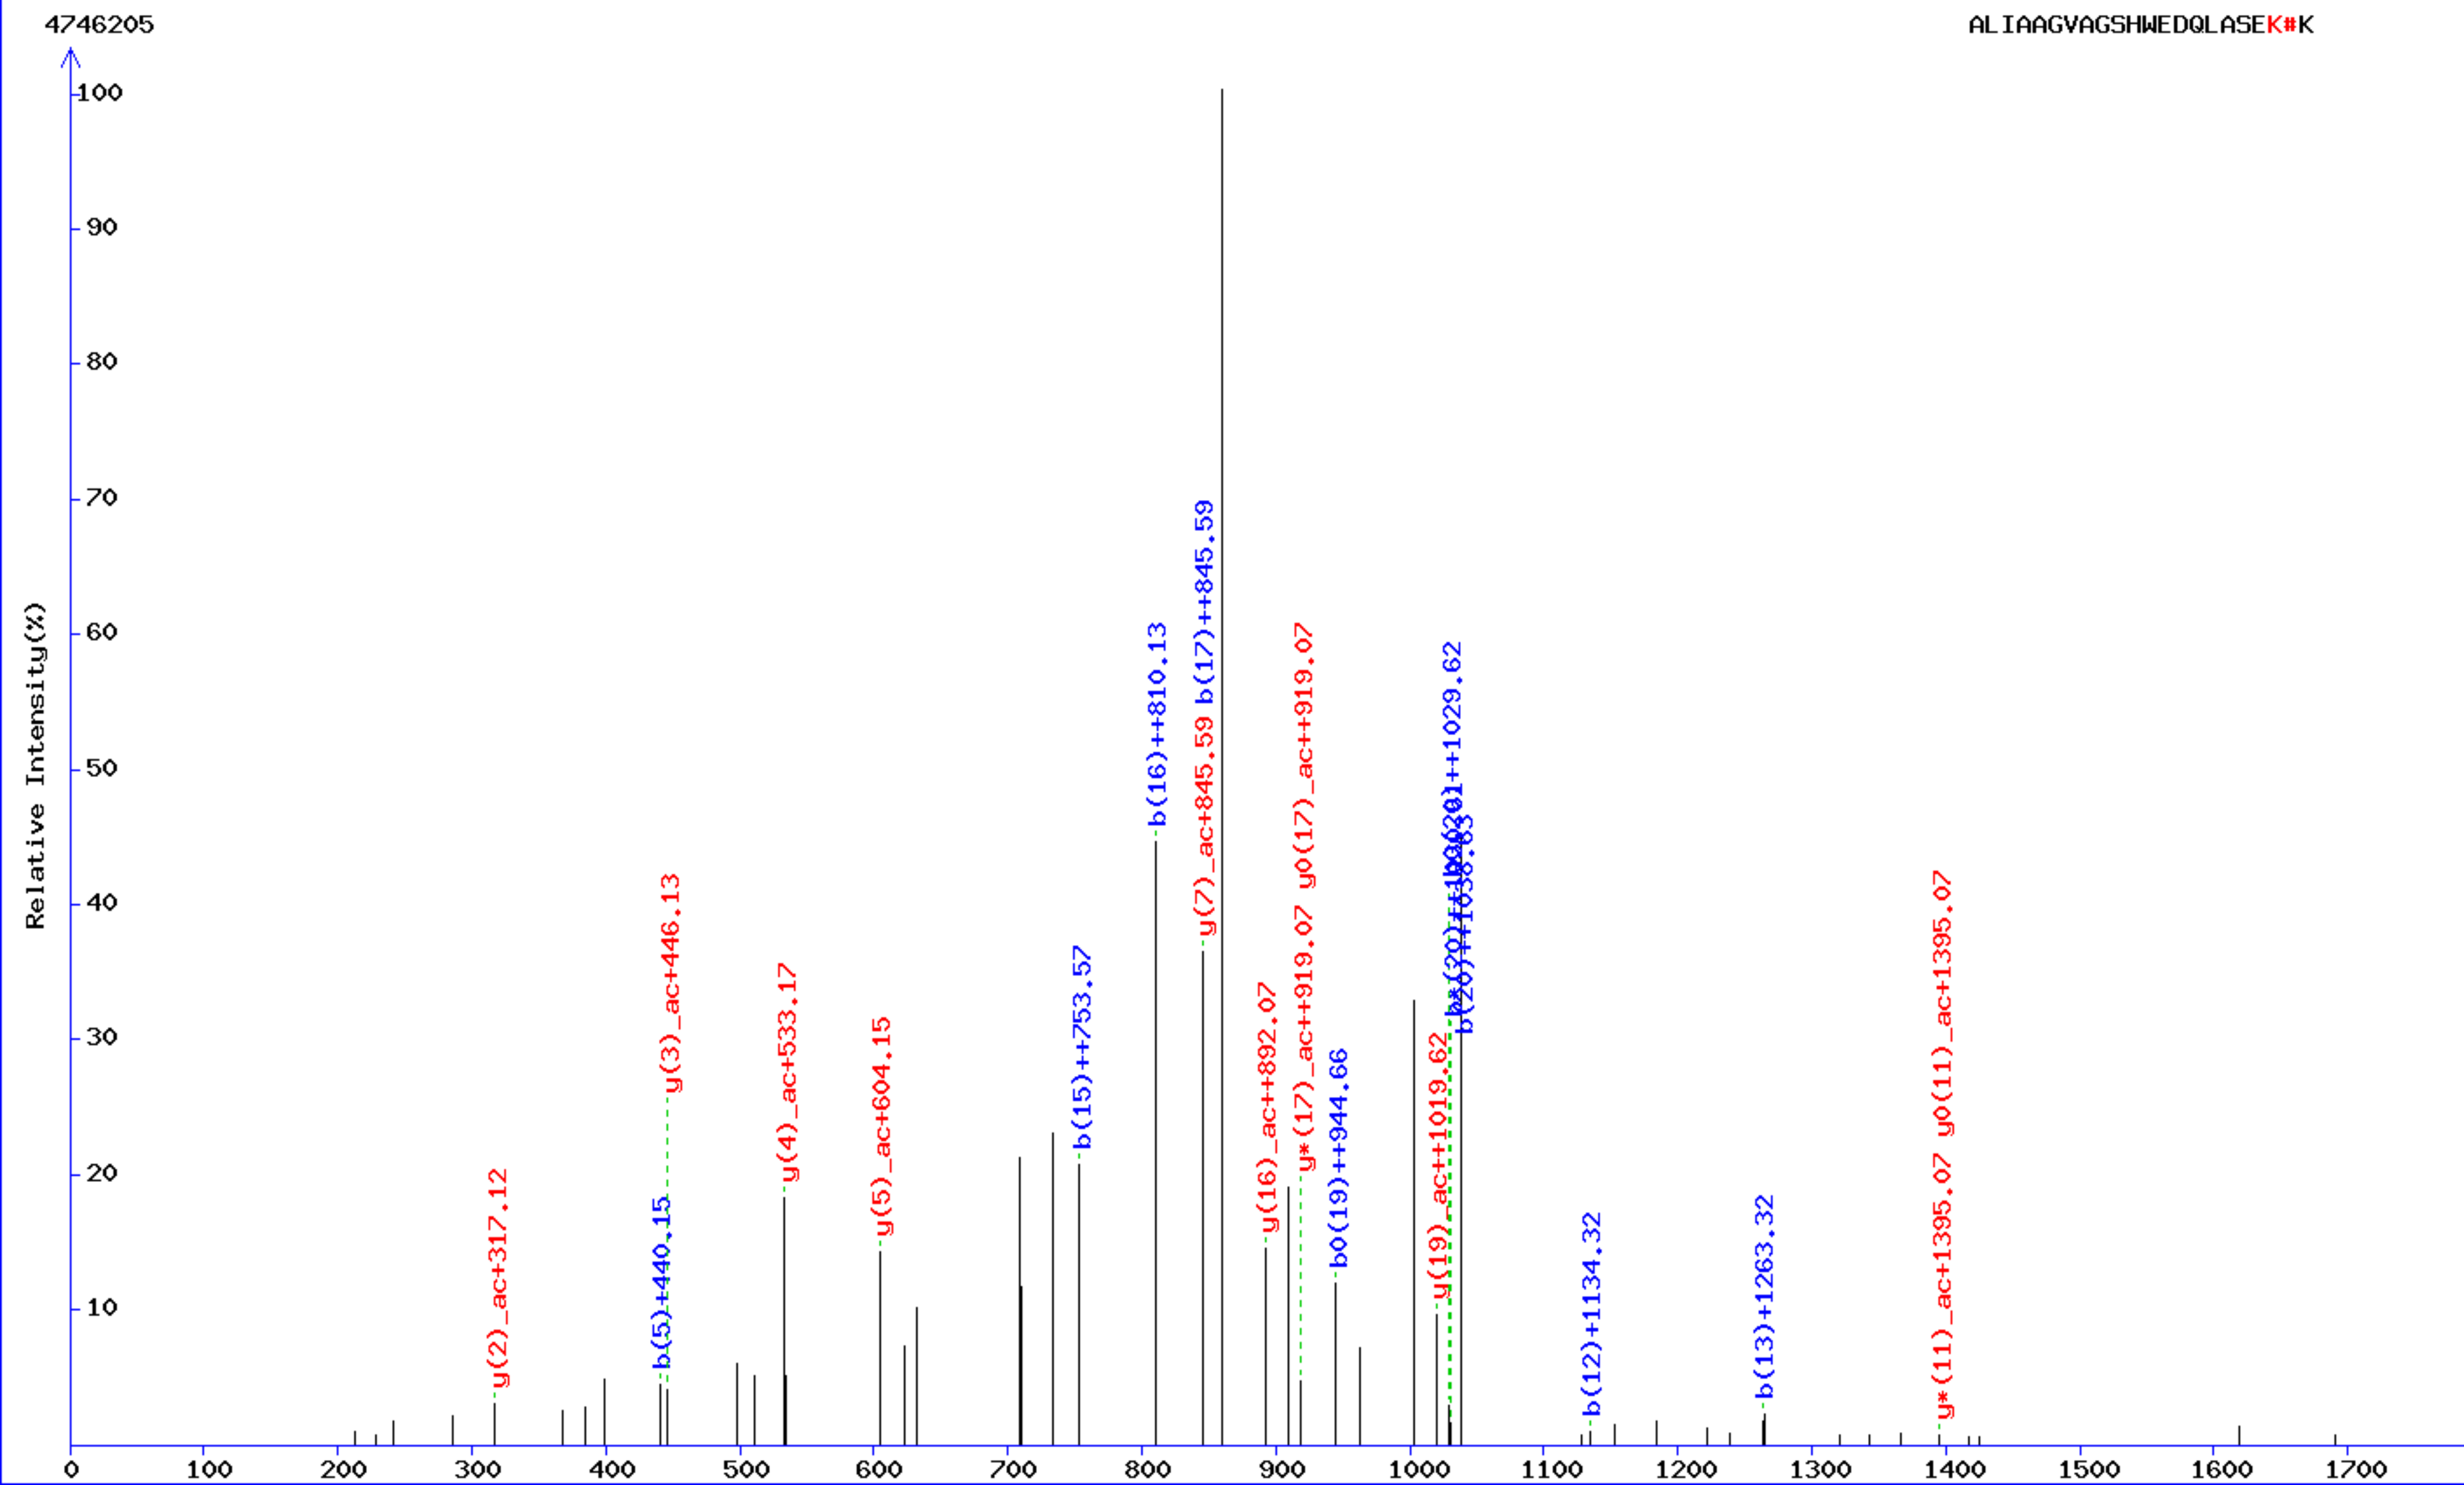

gi|148660203 MRA\_0443 molybdopterin biosynthesis protein MoeA2

GGDHGVEFVK#VAMQPGMPQGVGR

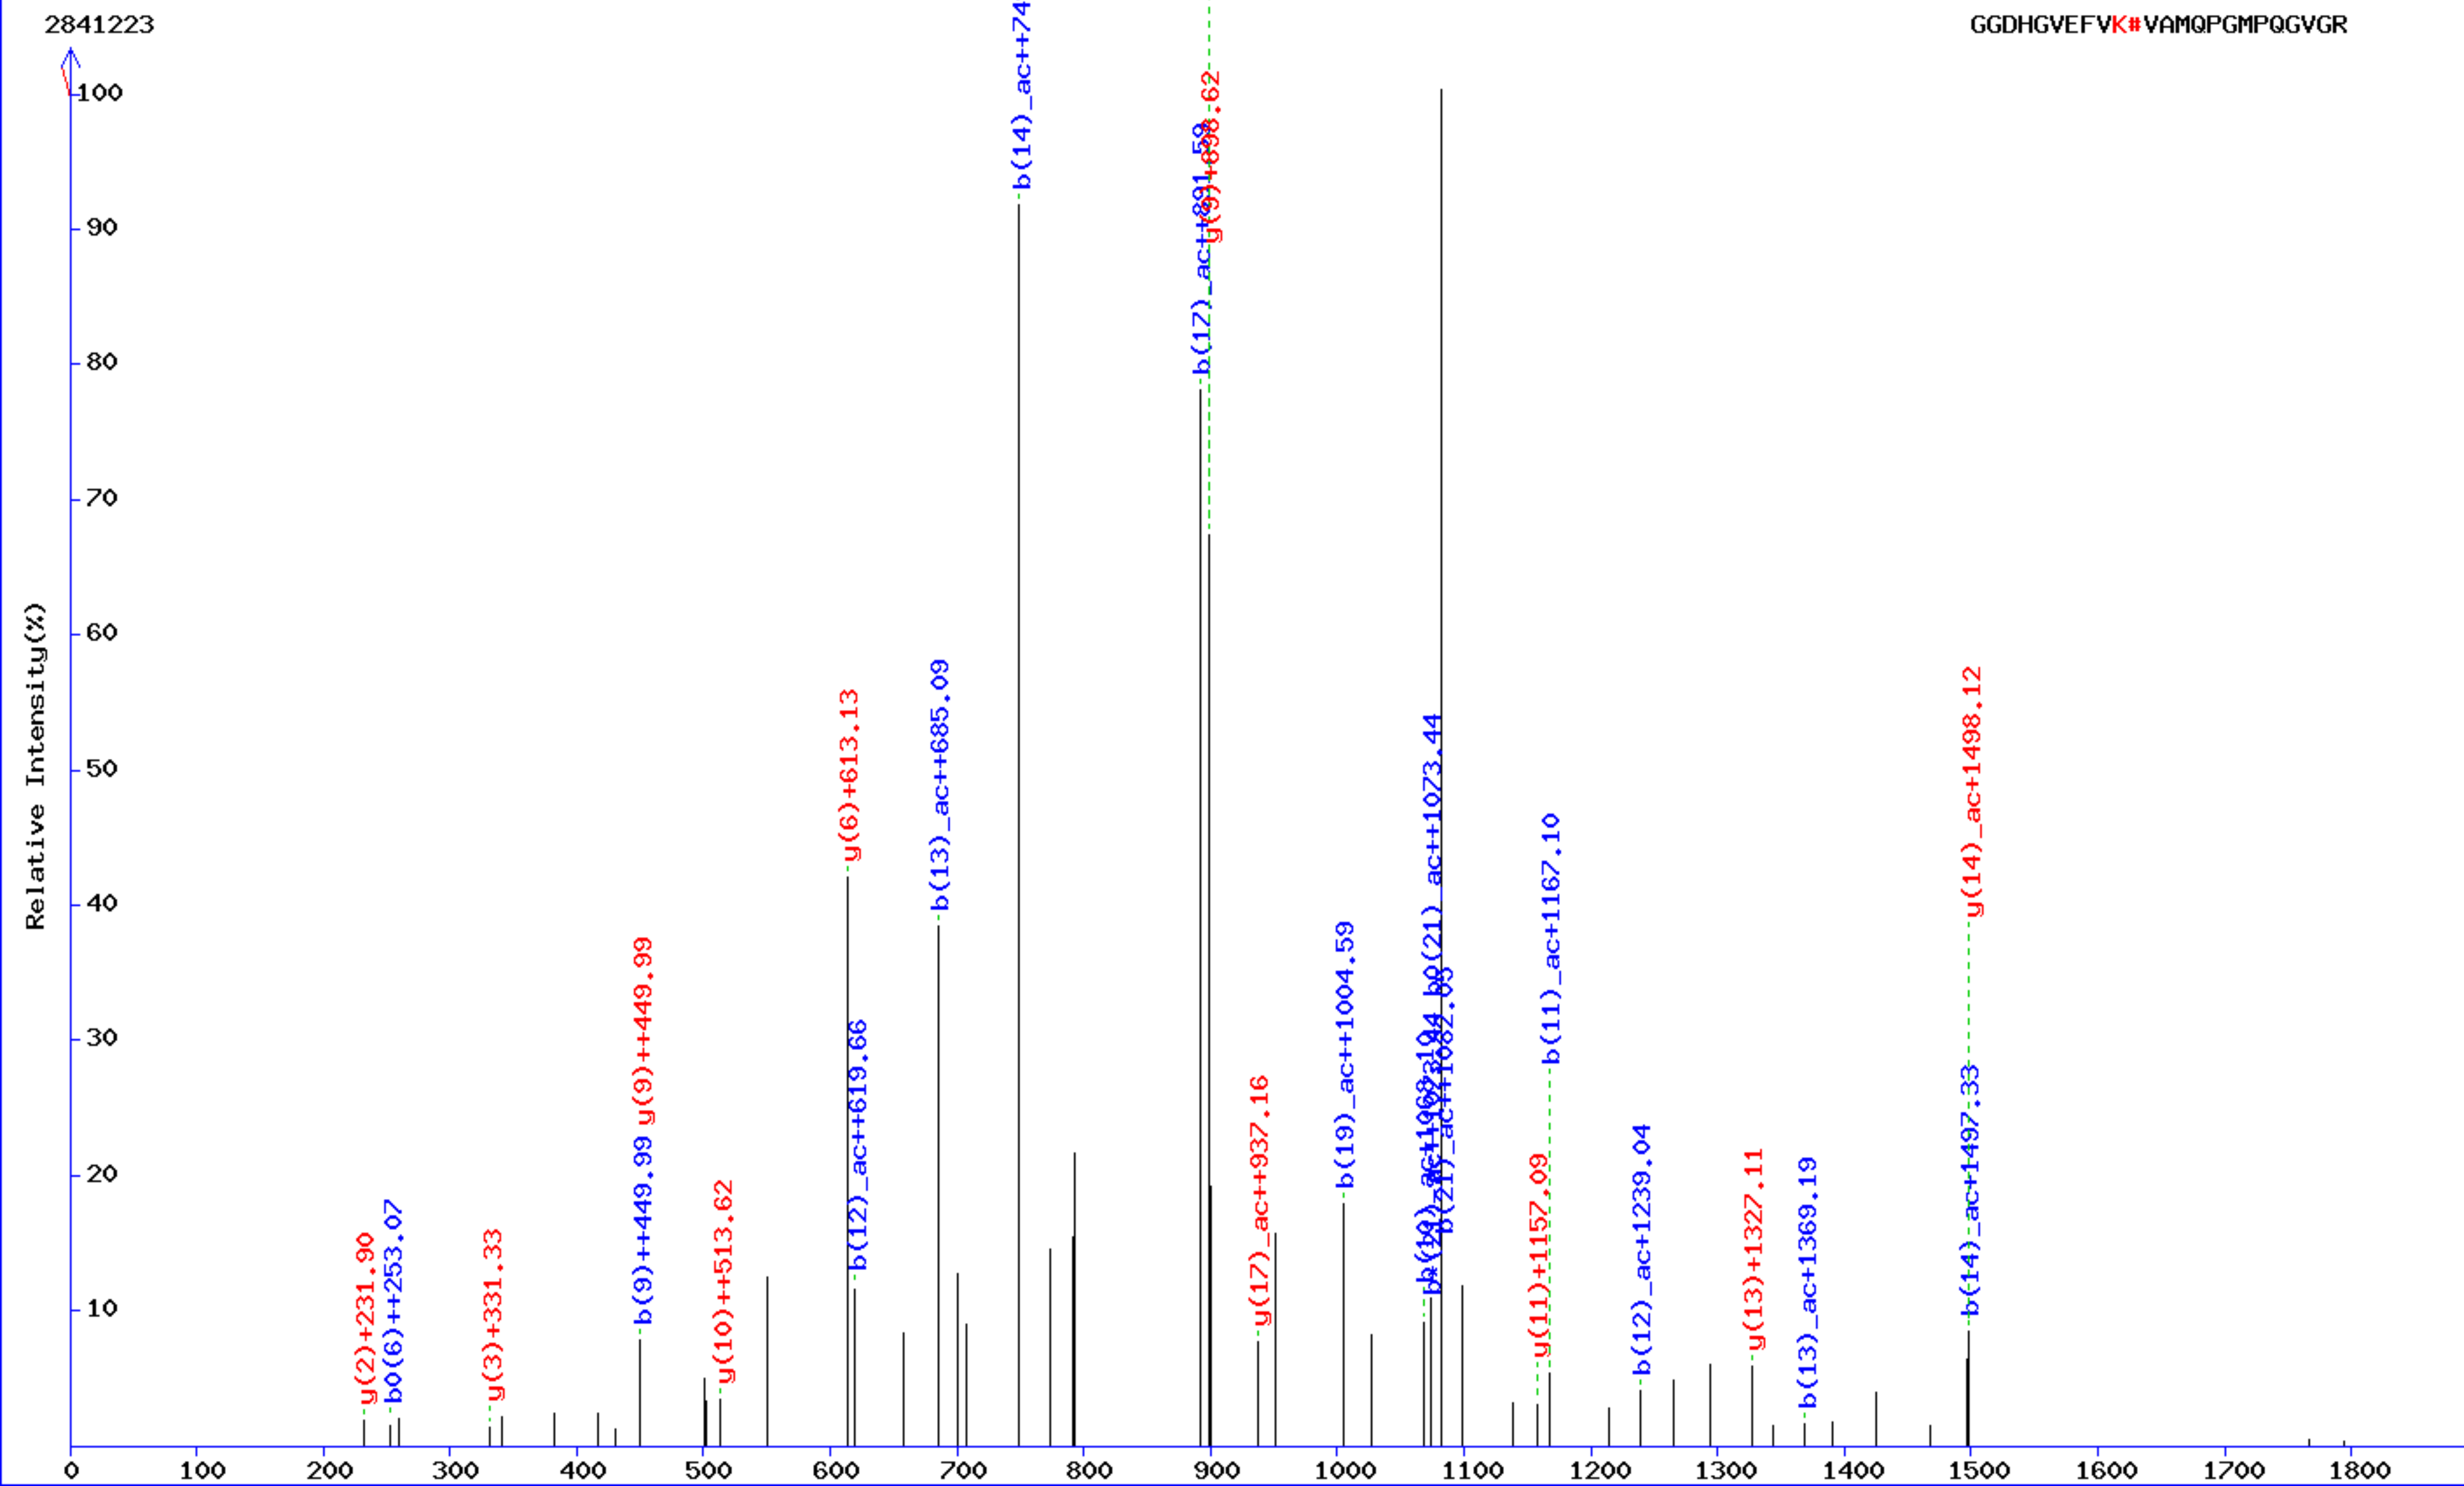

# gi|148660460 MRA\_0694 elongation factor Tu

VLHDKFPDLNETK#AFDQIDNAPEER

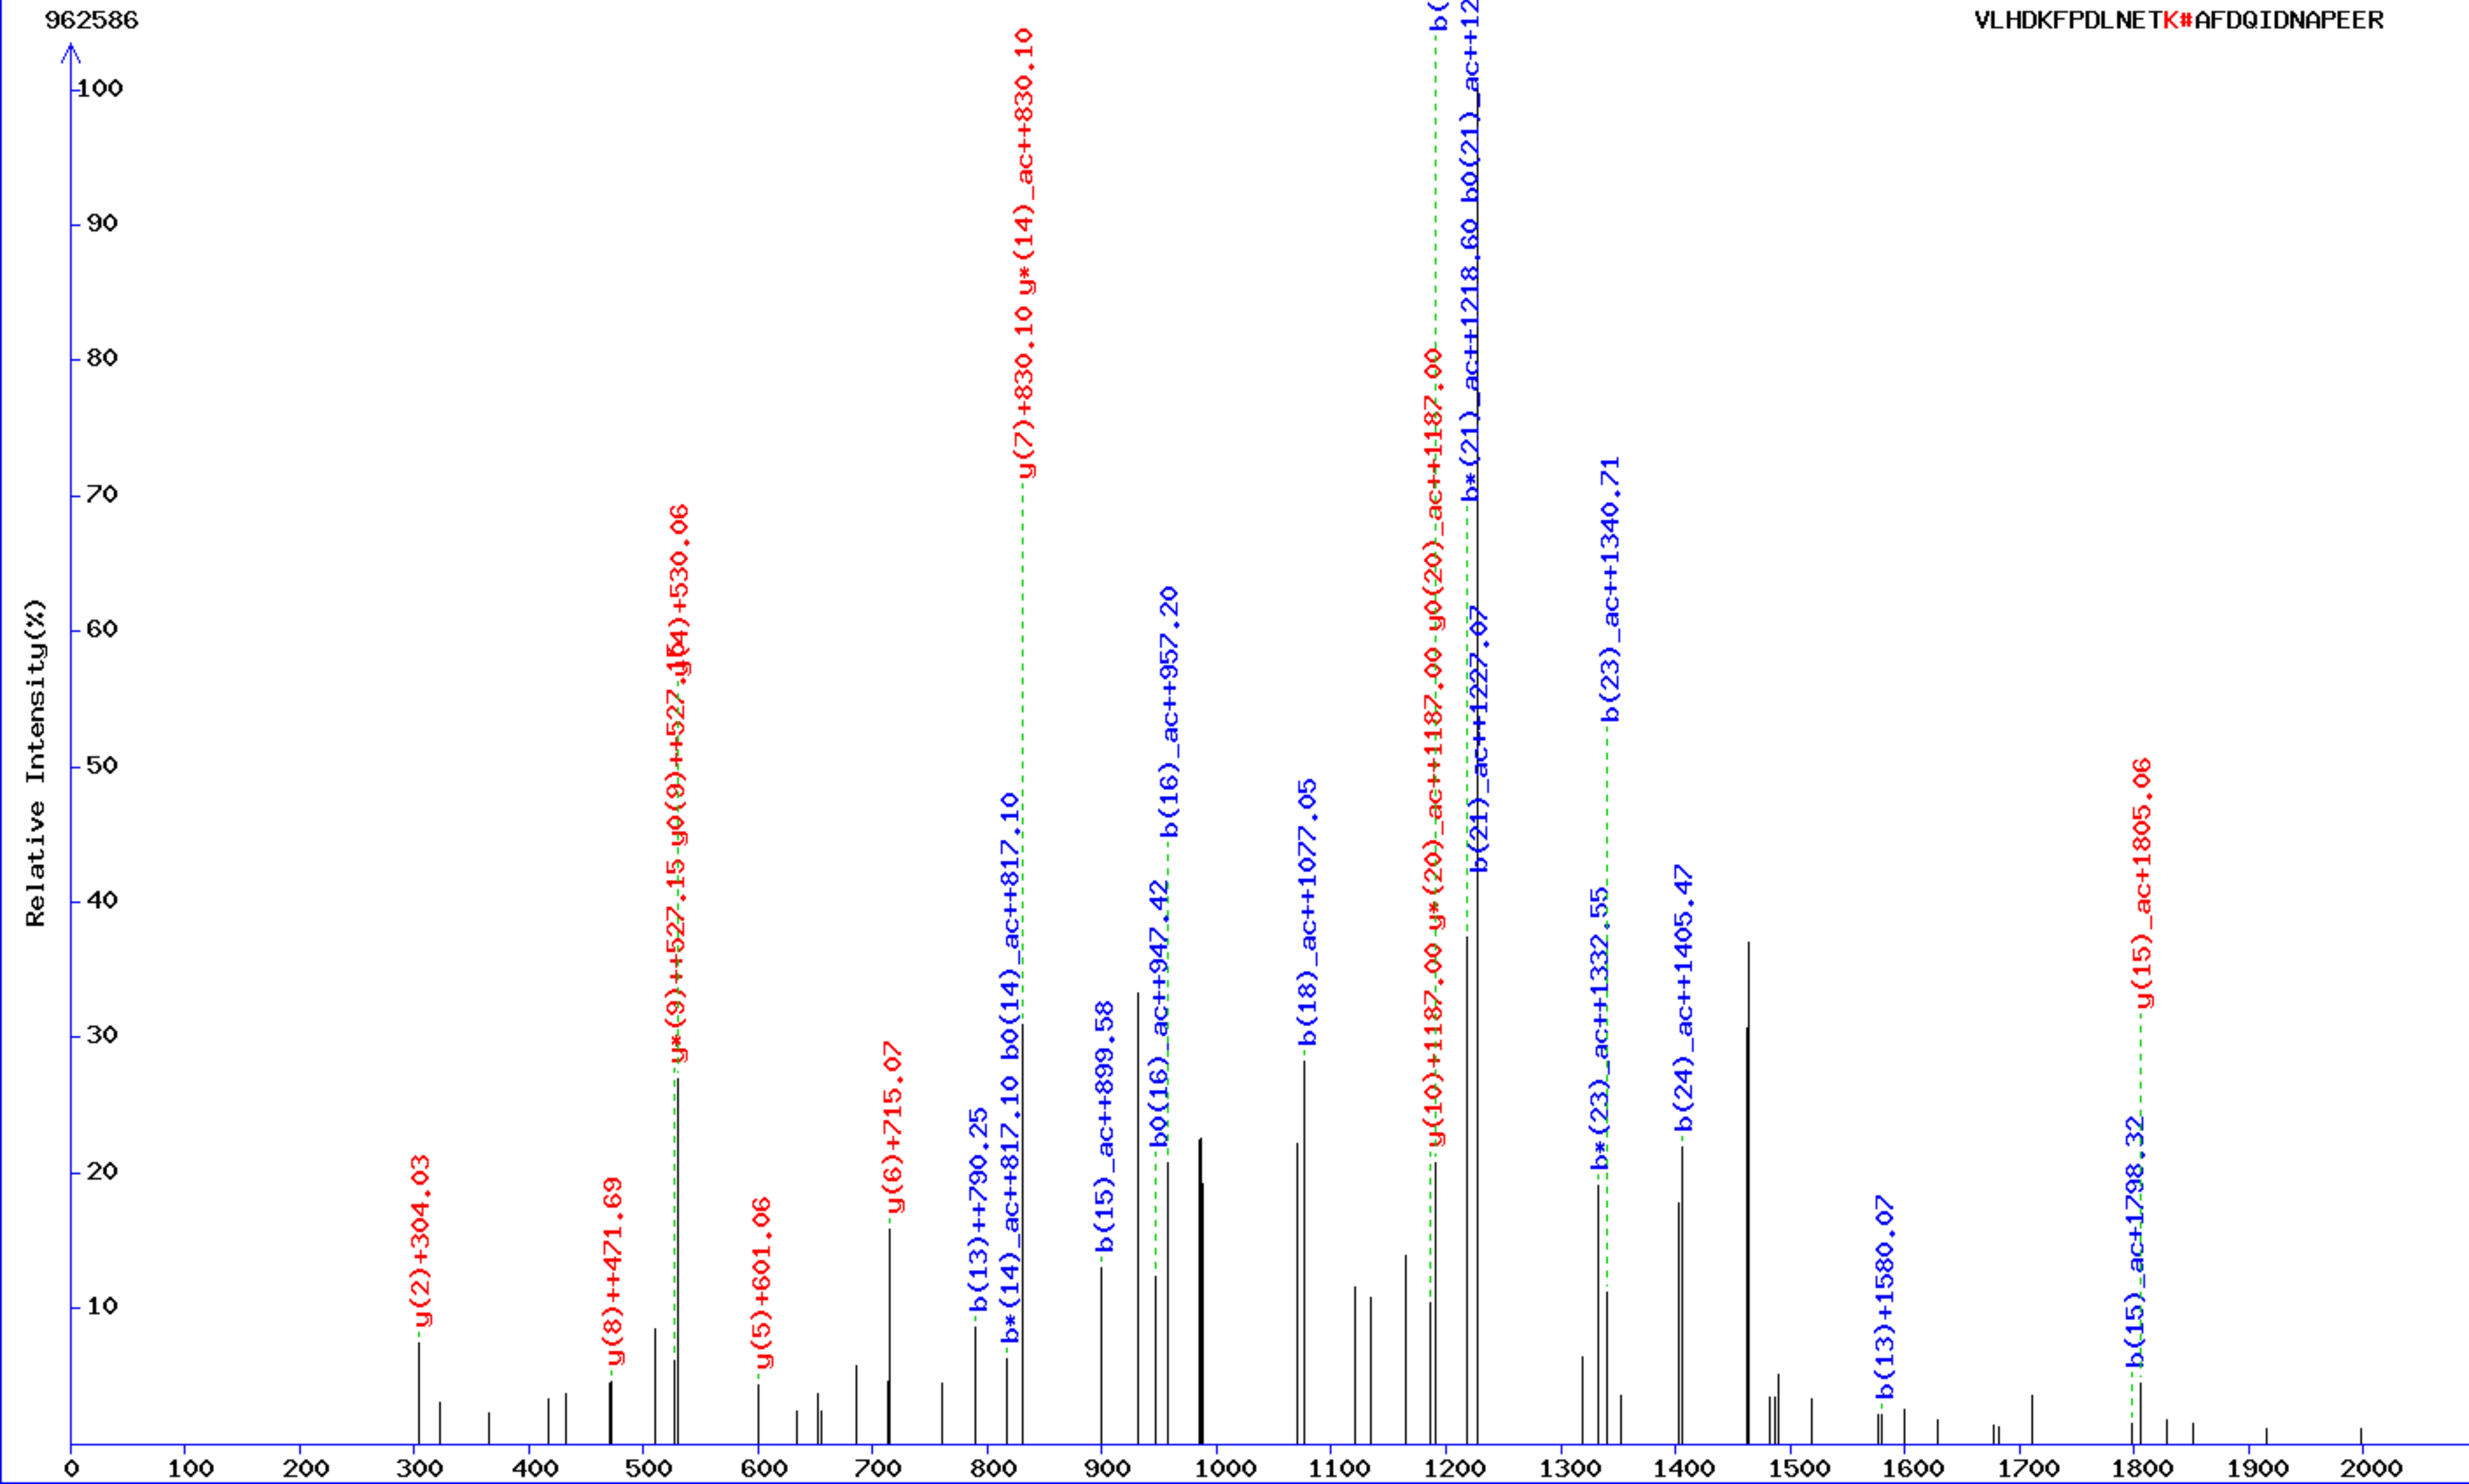



gi|148660116 MRA\_0359 molecular chaperone DnaK

NQAETLVYQTEK#FVK

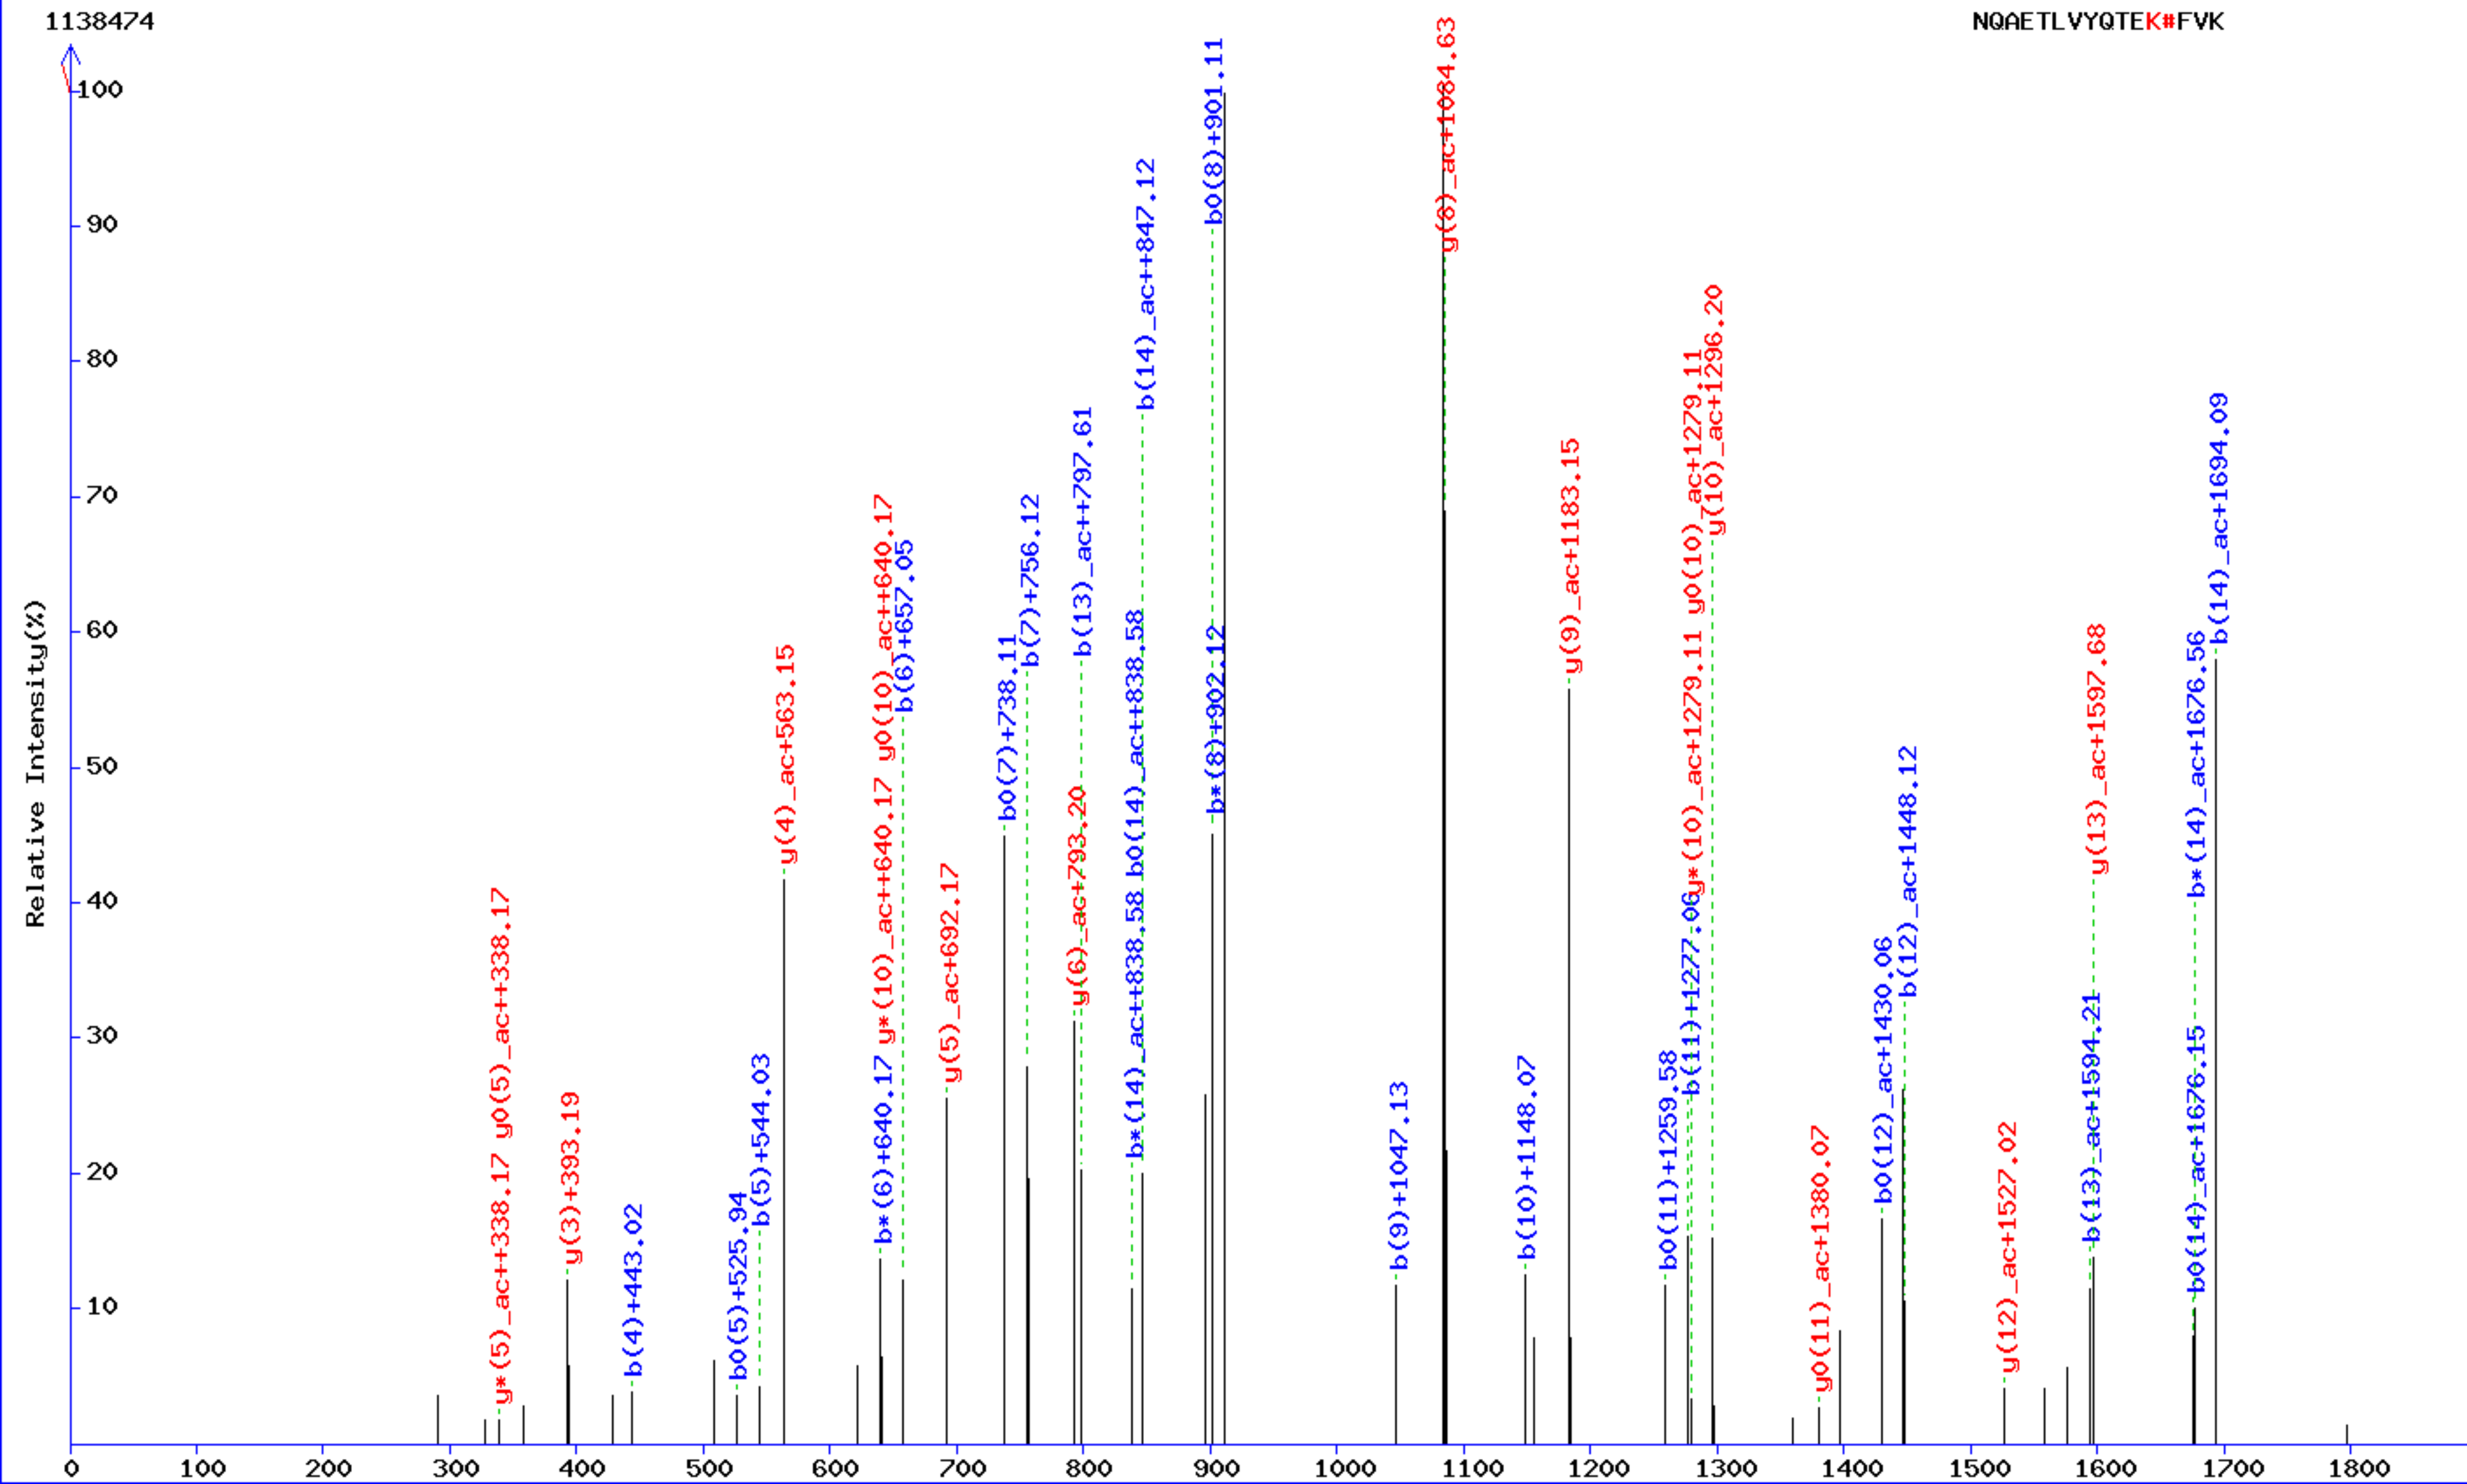

gi|148661098 MRA\_1318 ATP synthase F0F1 subunit beta

GHVFNALGDCLDEPGYGEK#FEHWSIHR

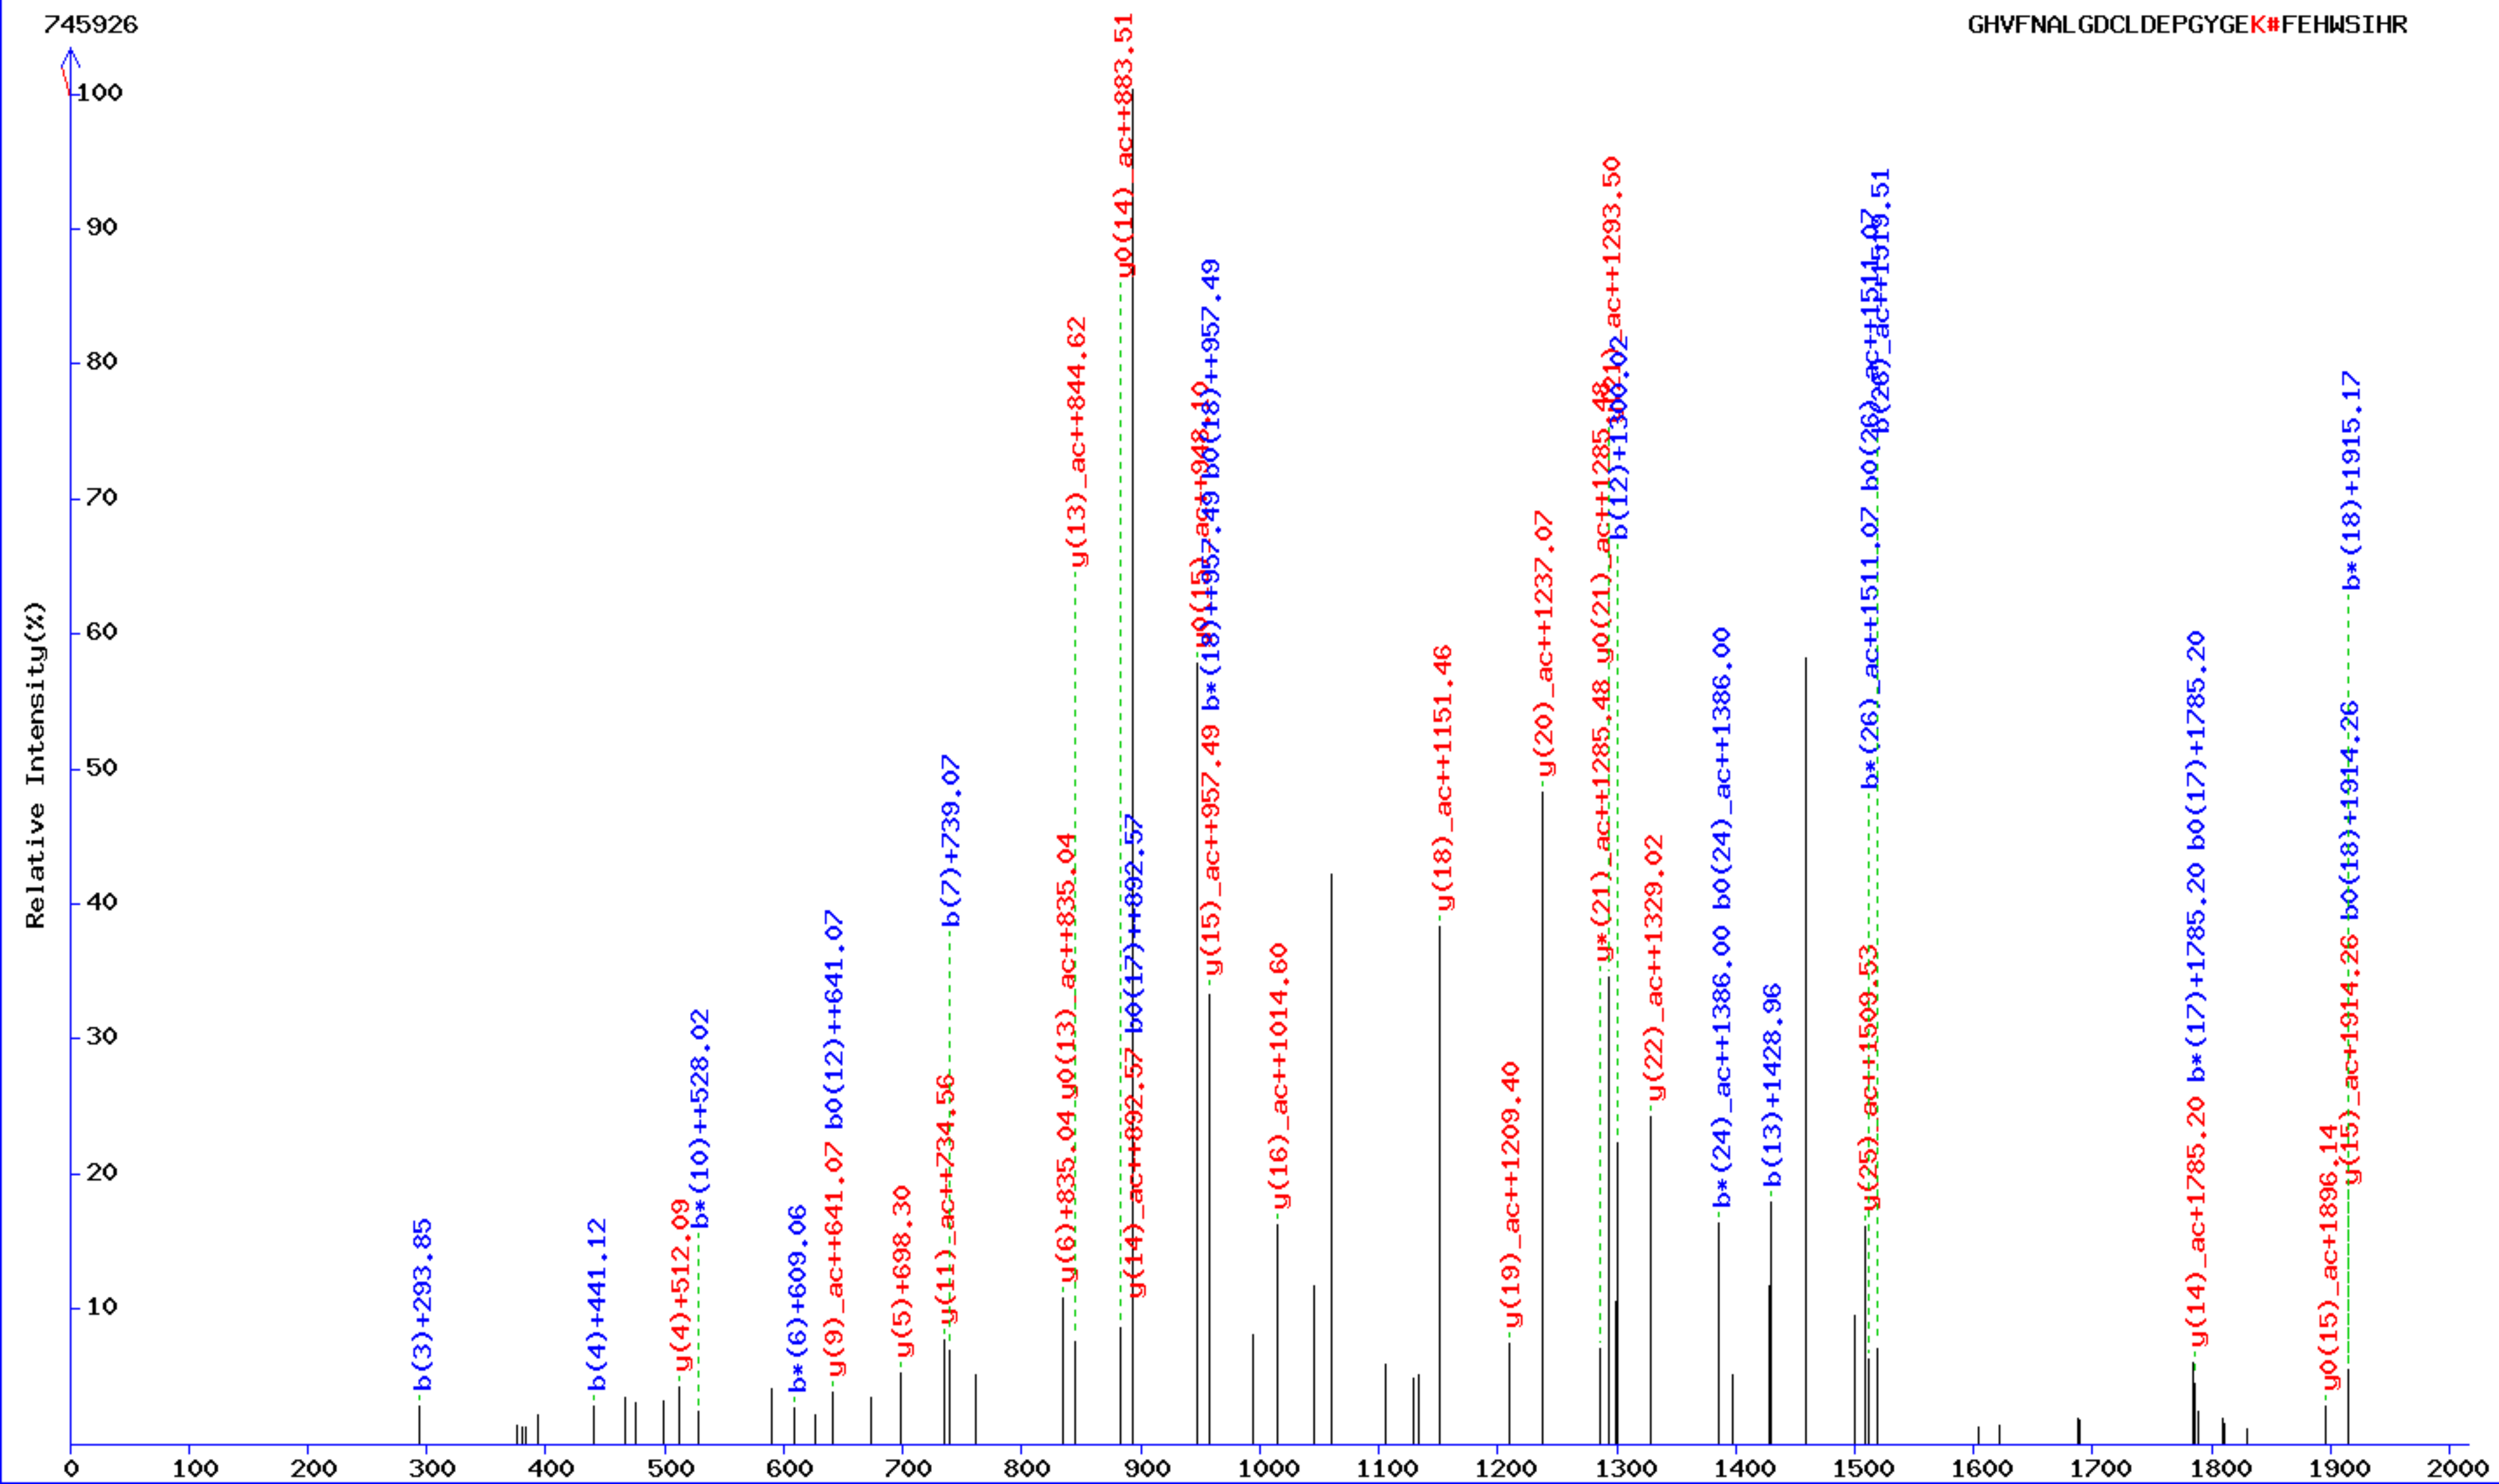

# gi|148661845 MRA\_2046 antigen Hsp20

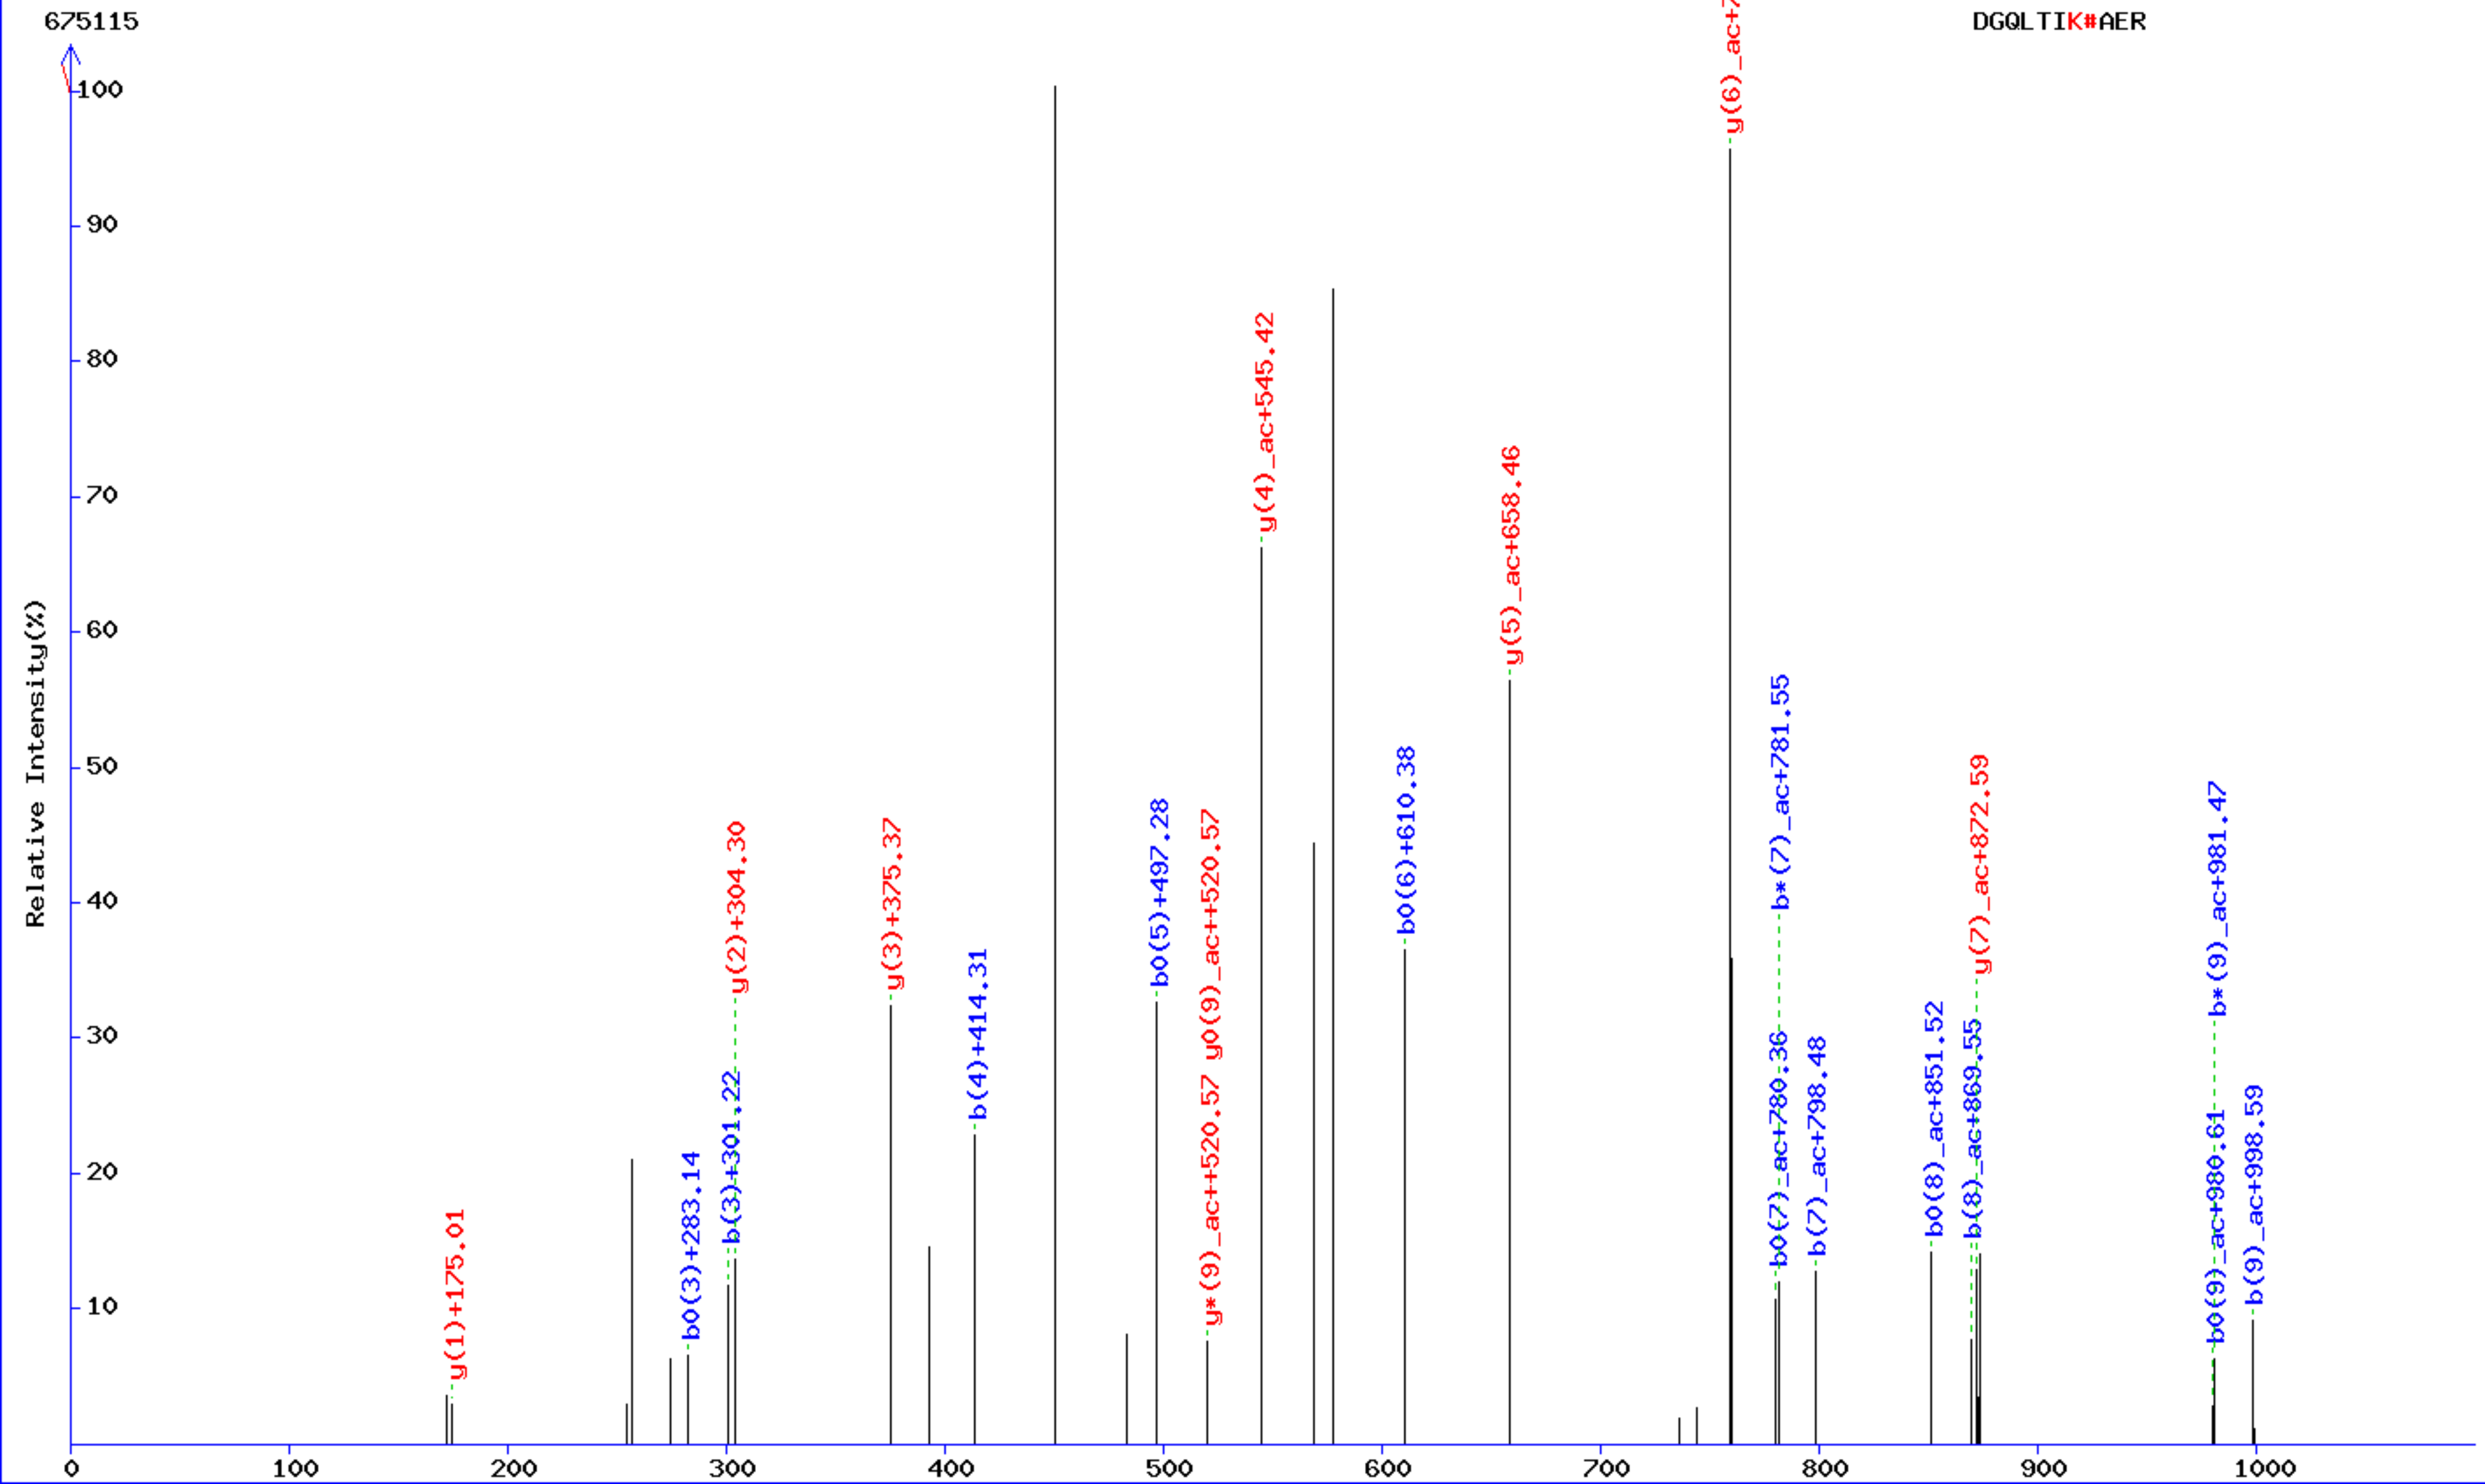

# gi|148660205 MRA\_0445 molecular chaperone GroEL

QE IENSDSDYDREK#LQER

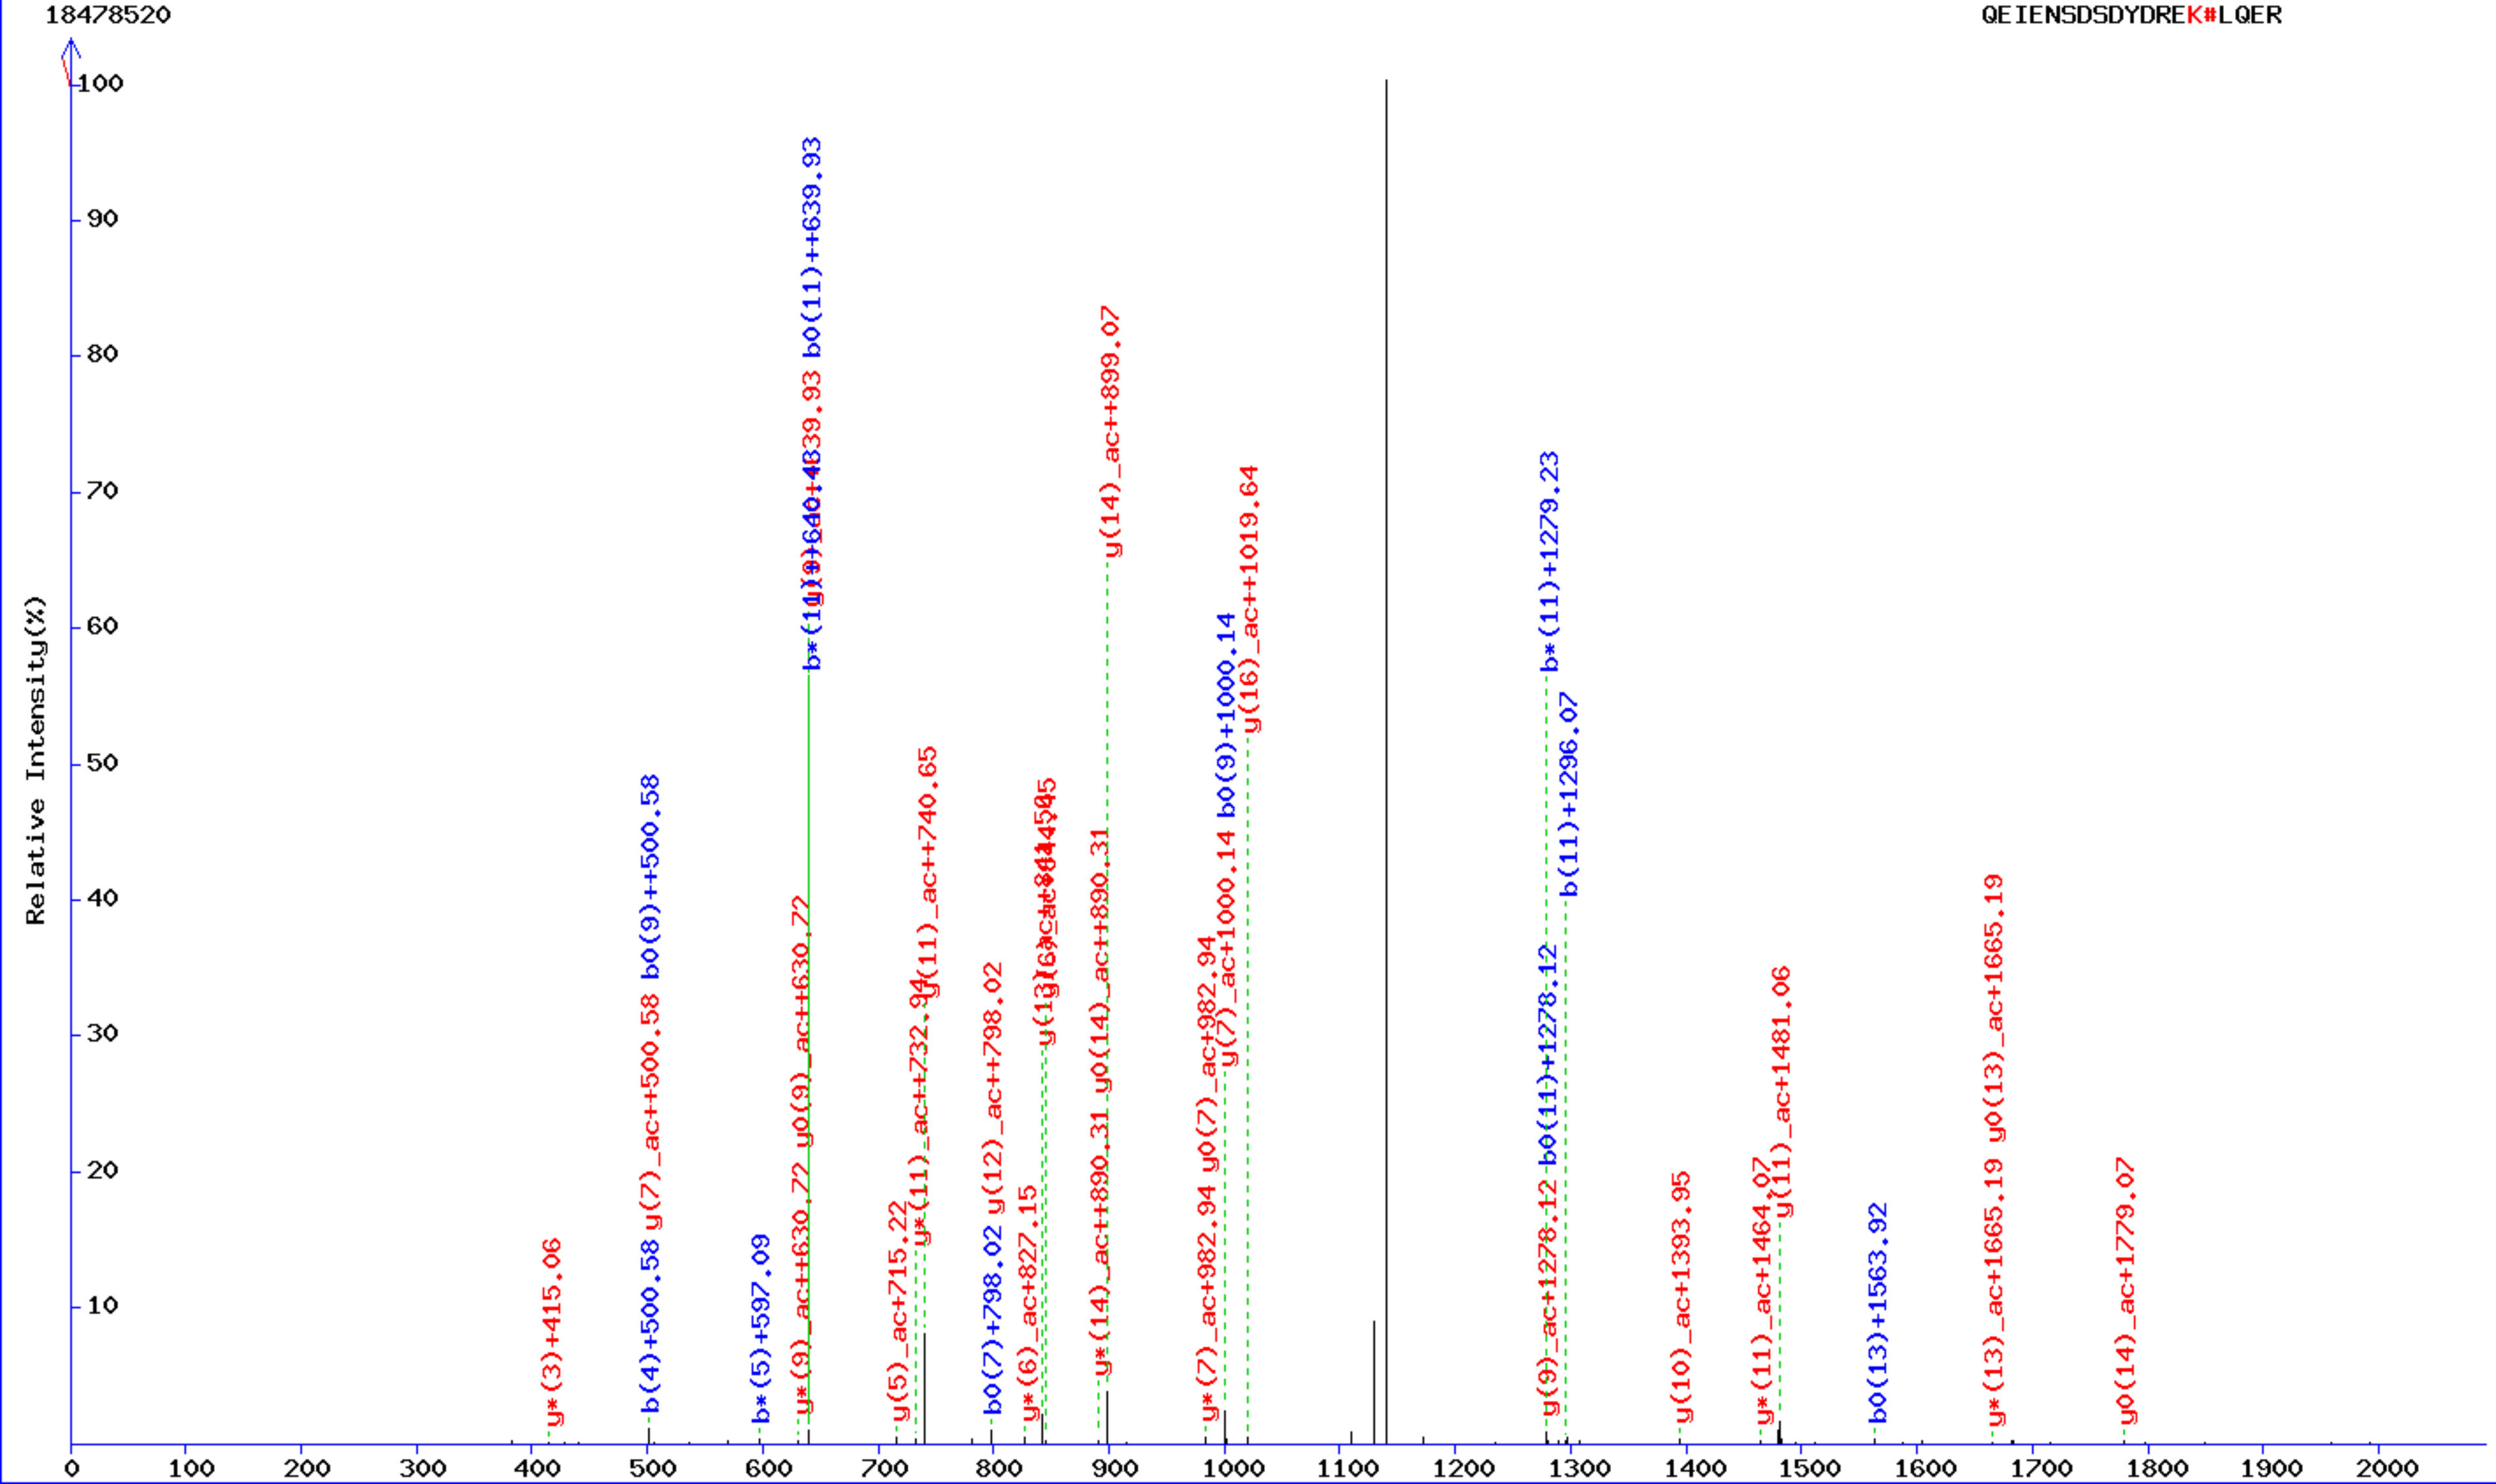

# gi|148660172 MRA\_0413 f420-dependent glucose-6-phosphate dehydrogenase Fgd1

GEELYTEK#LMPAVR

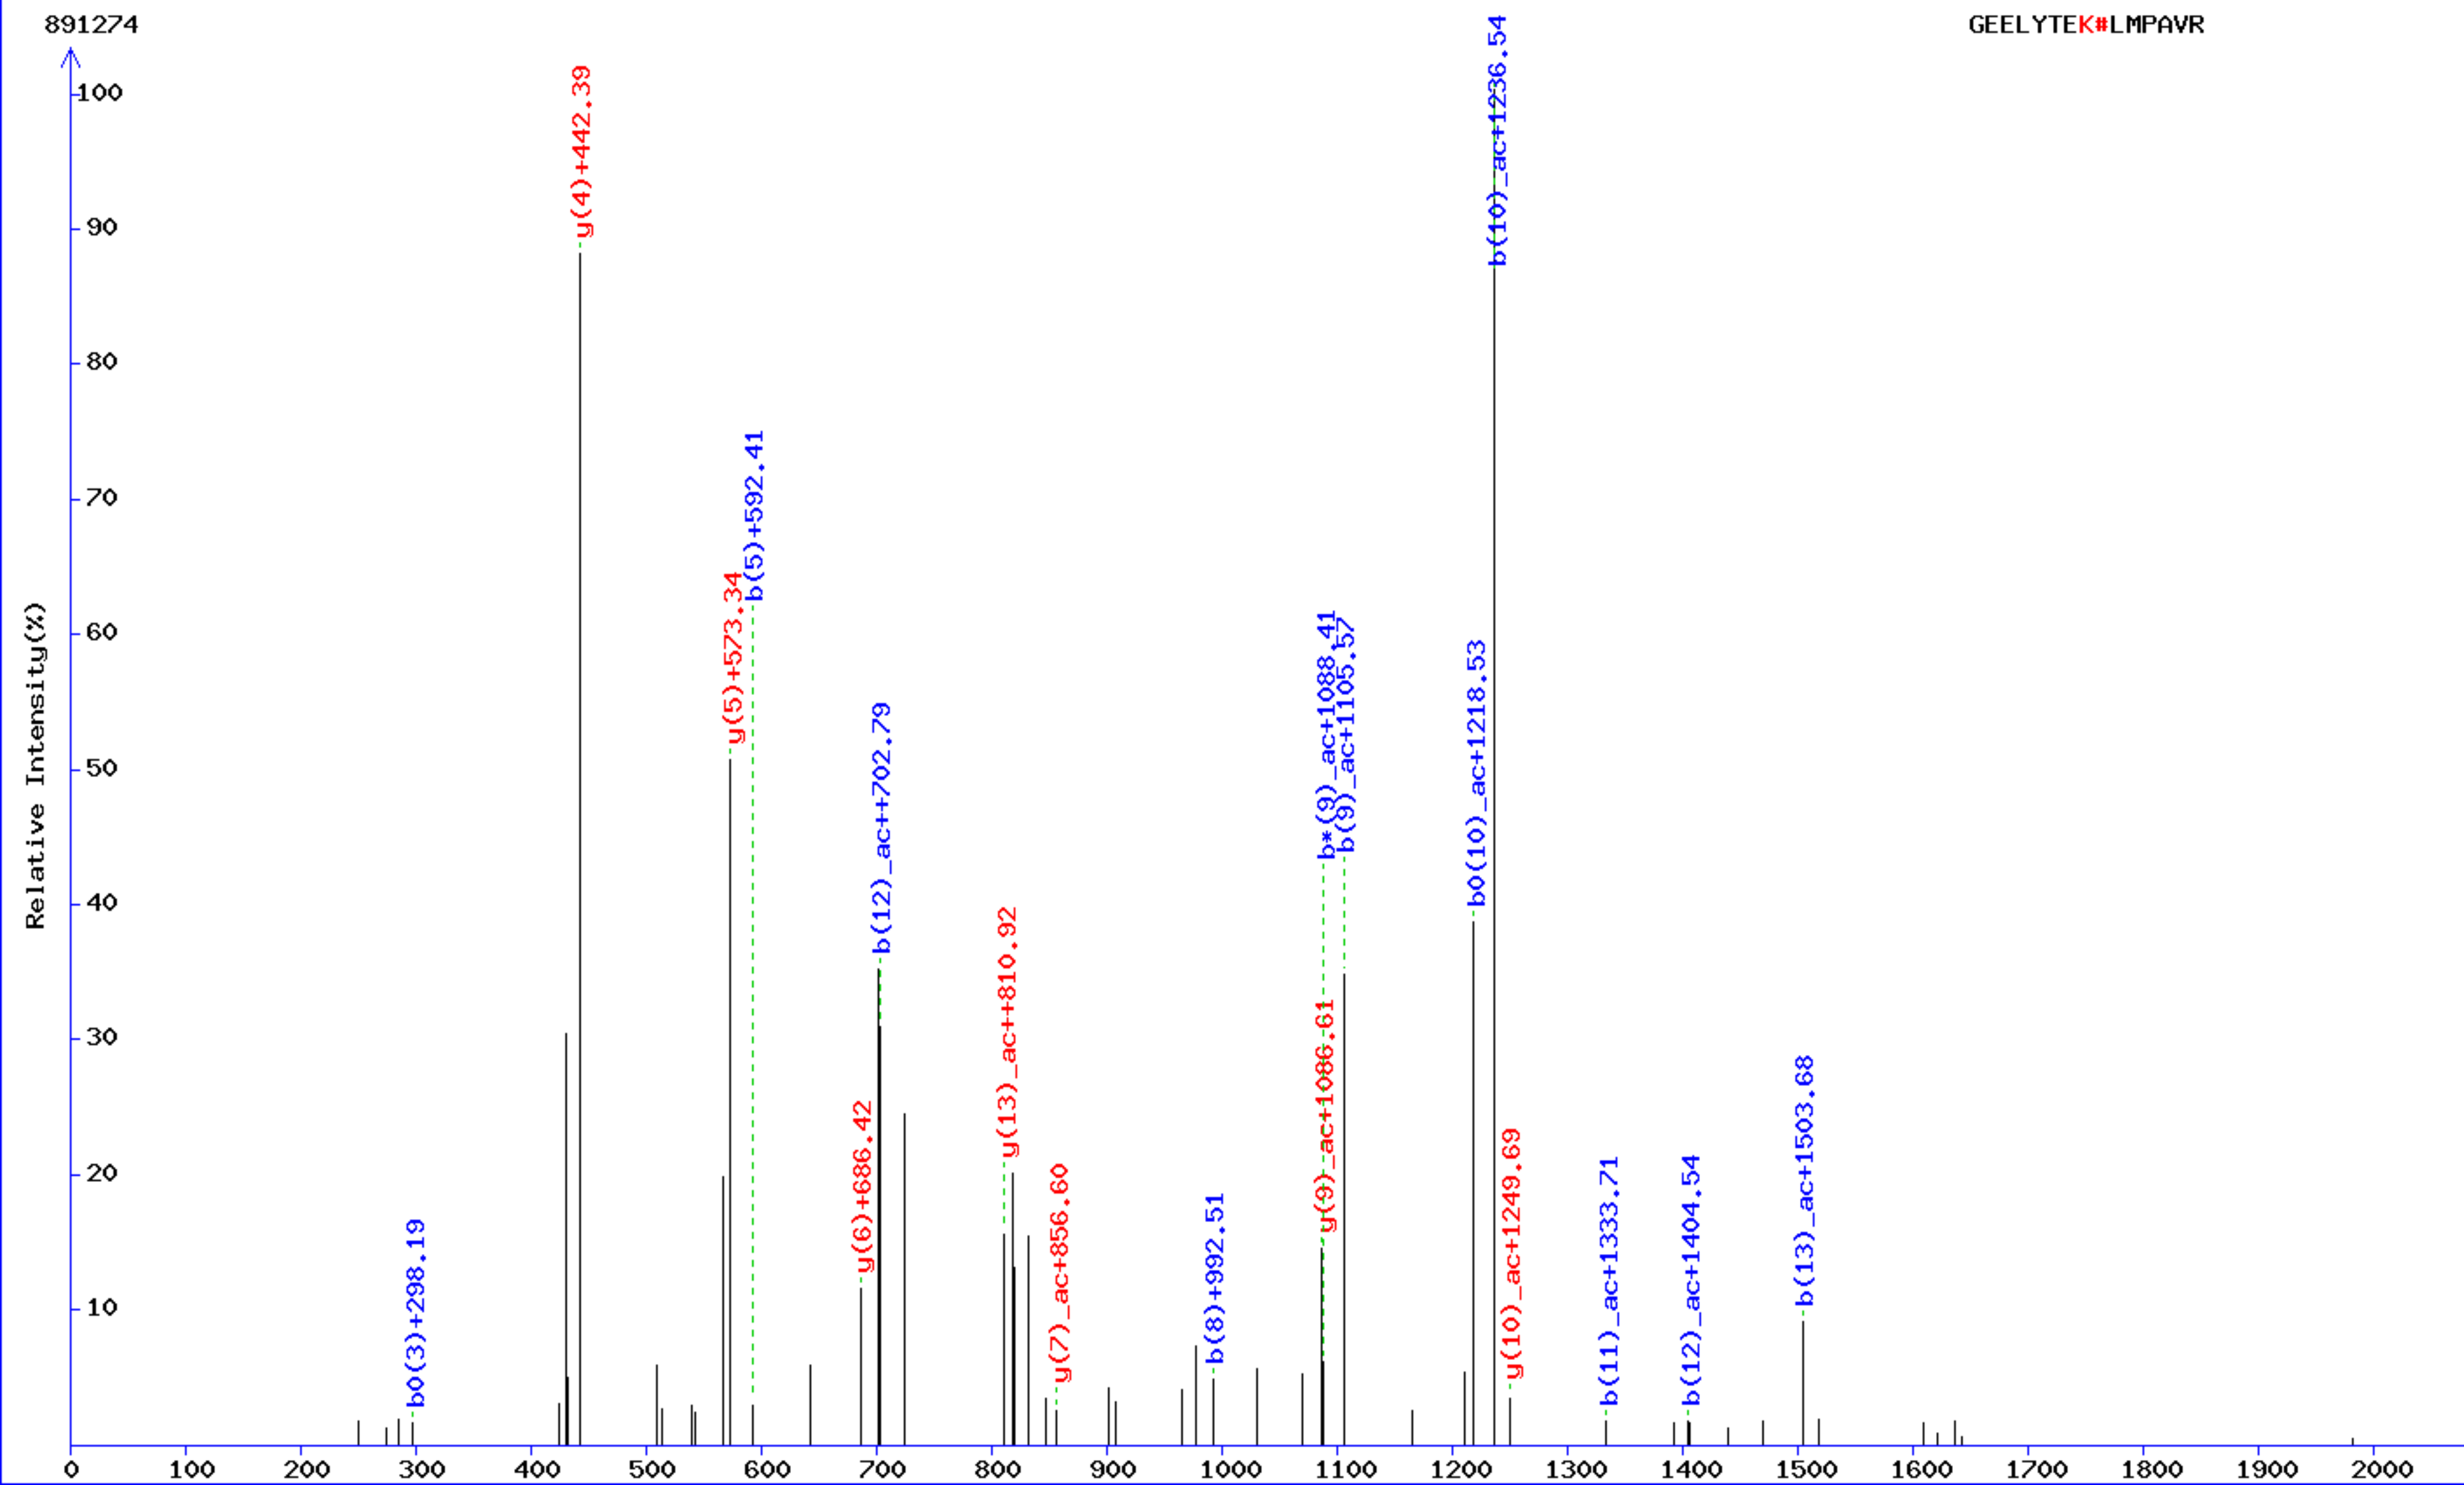

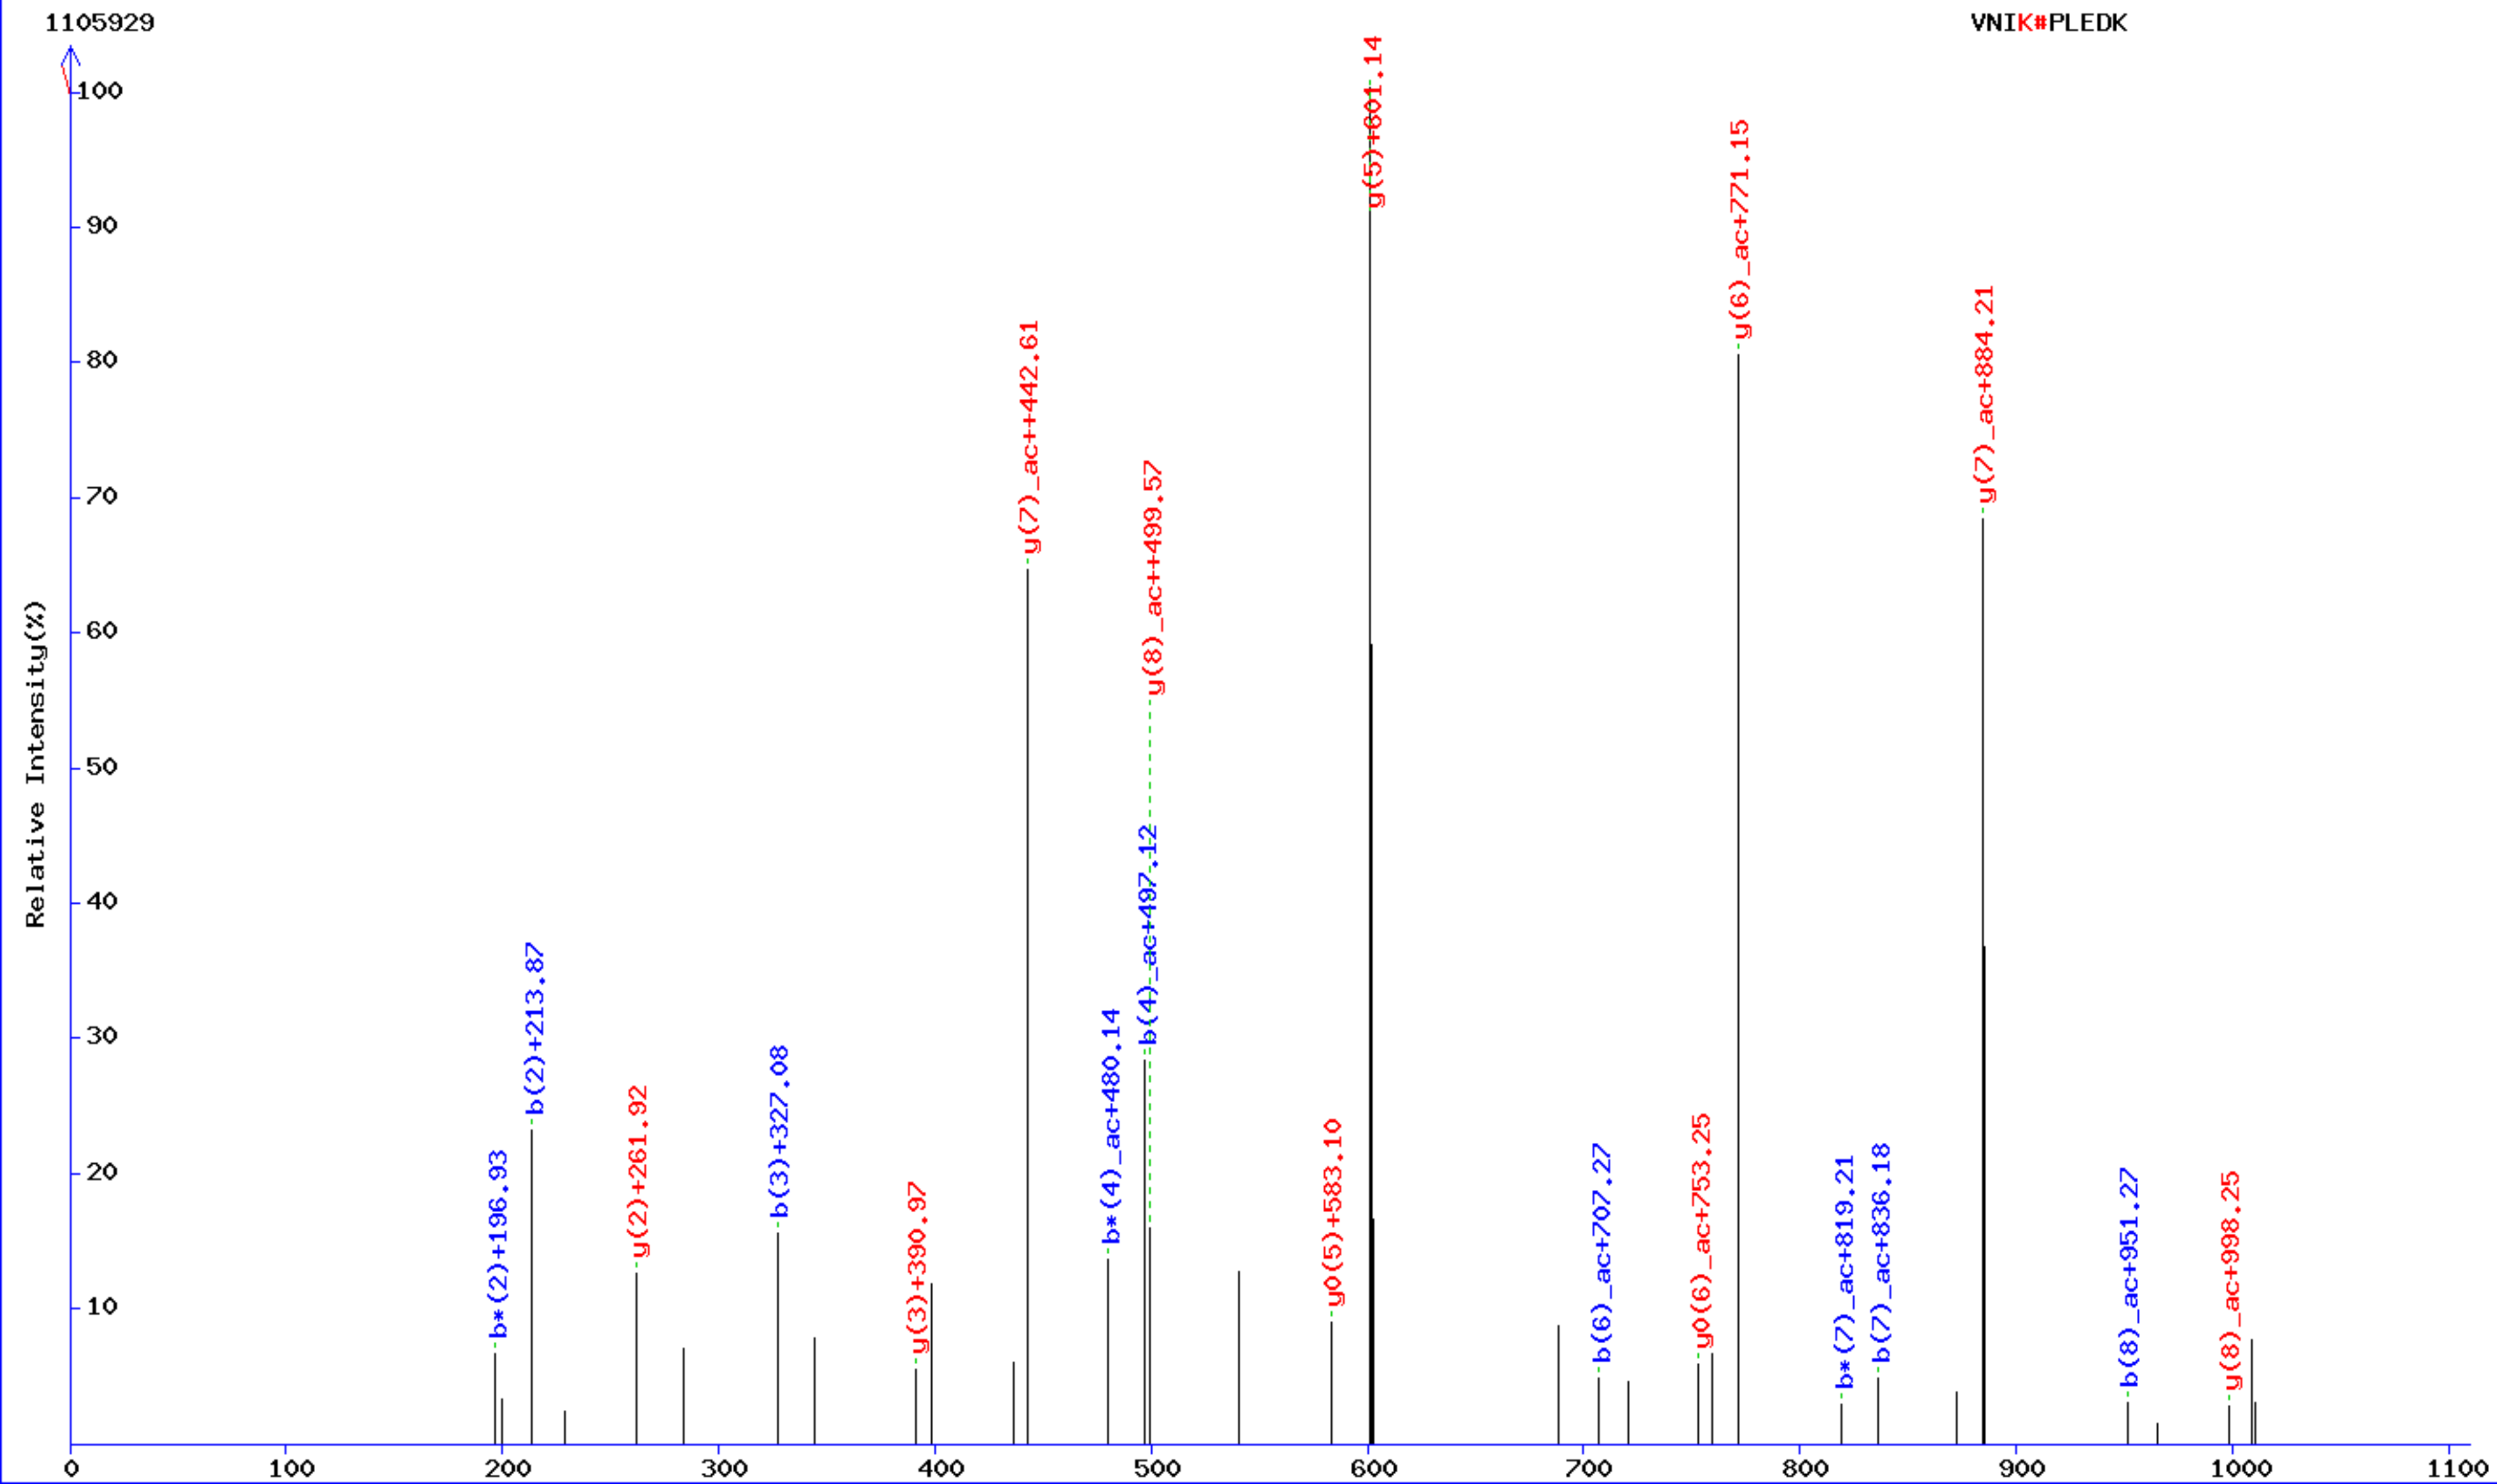

# gi|148659759 MRA\_0002 DNA polymerase III subunit beta

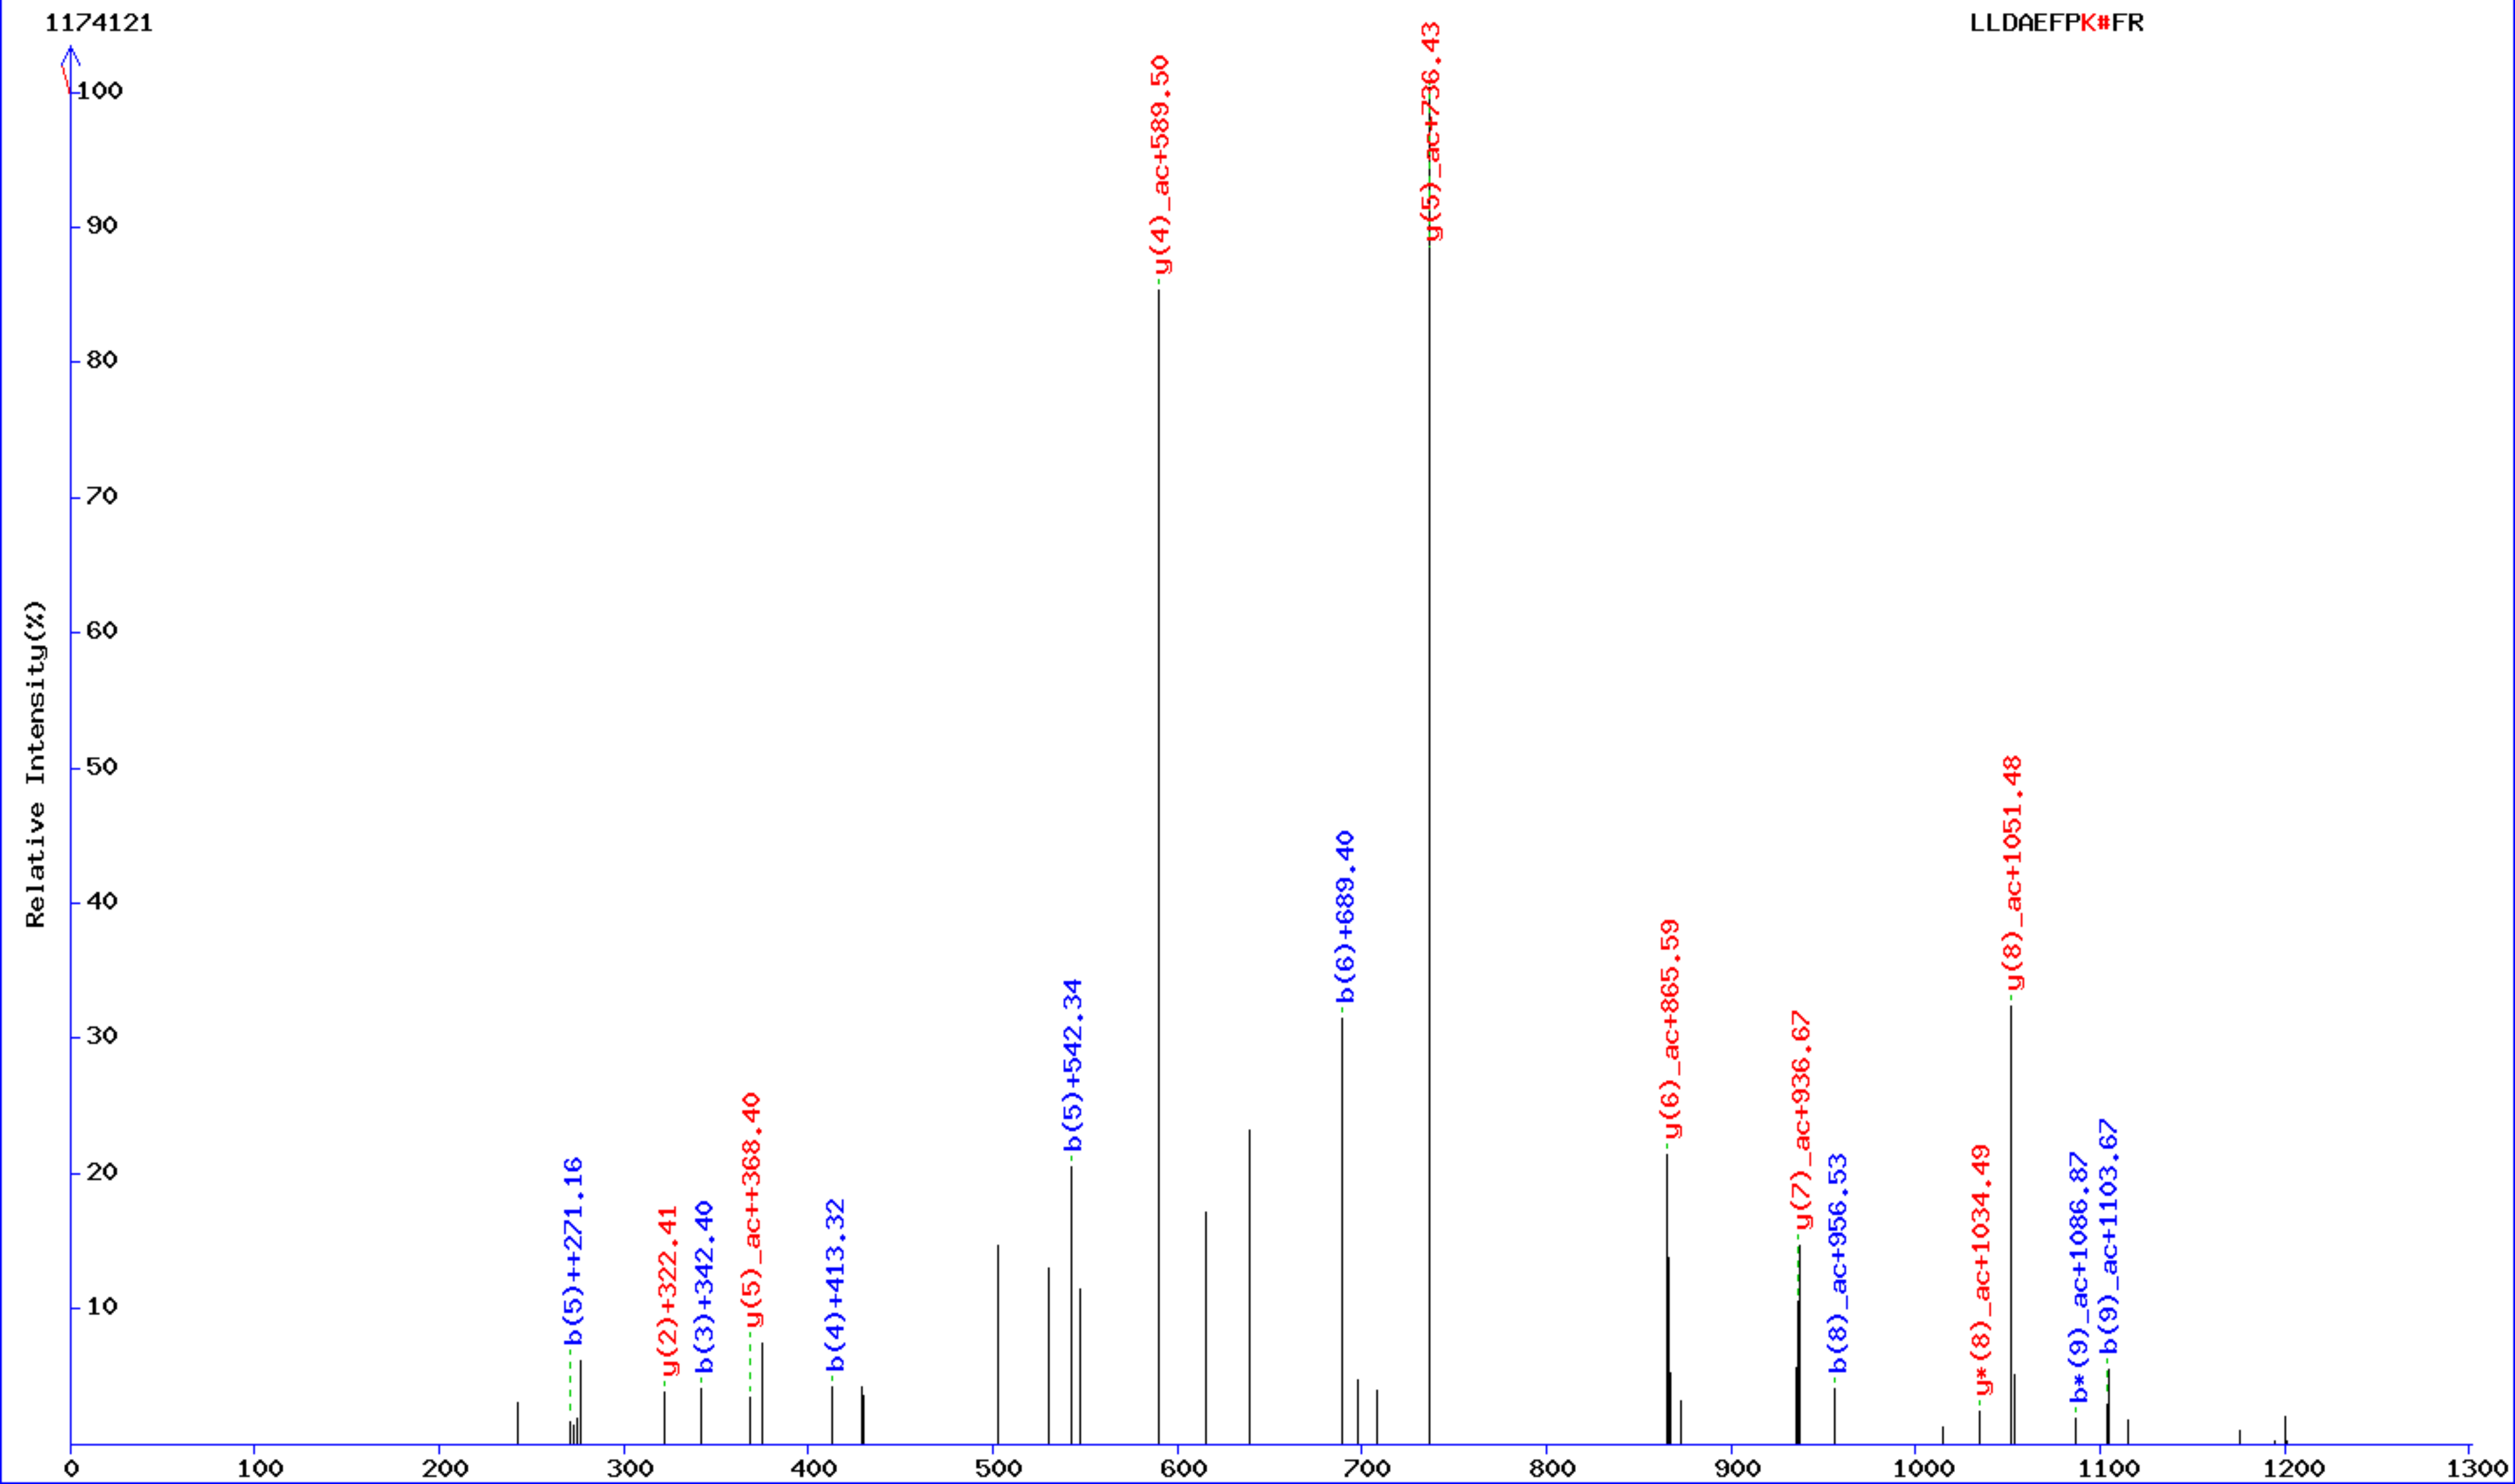

# gi|148662753 MRA\_2934 30S ribosomal protein S16

LEVFNAAALAADGGPTTEATK#PK

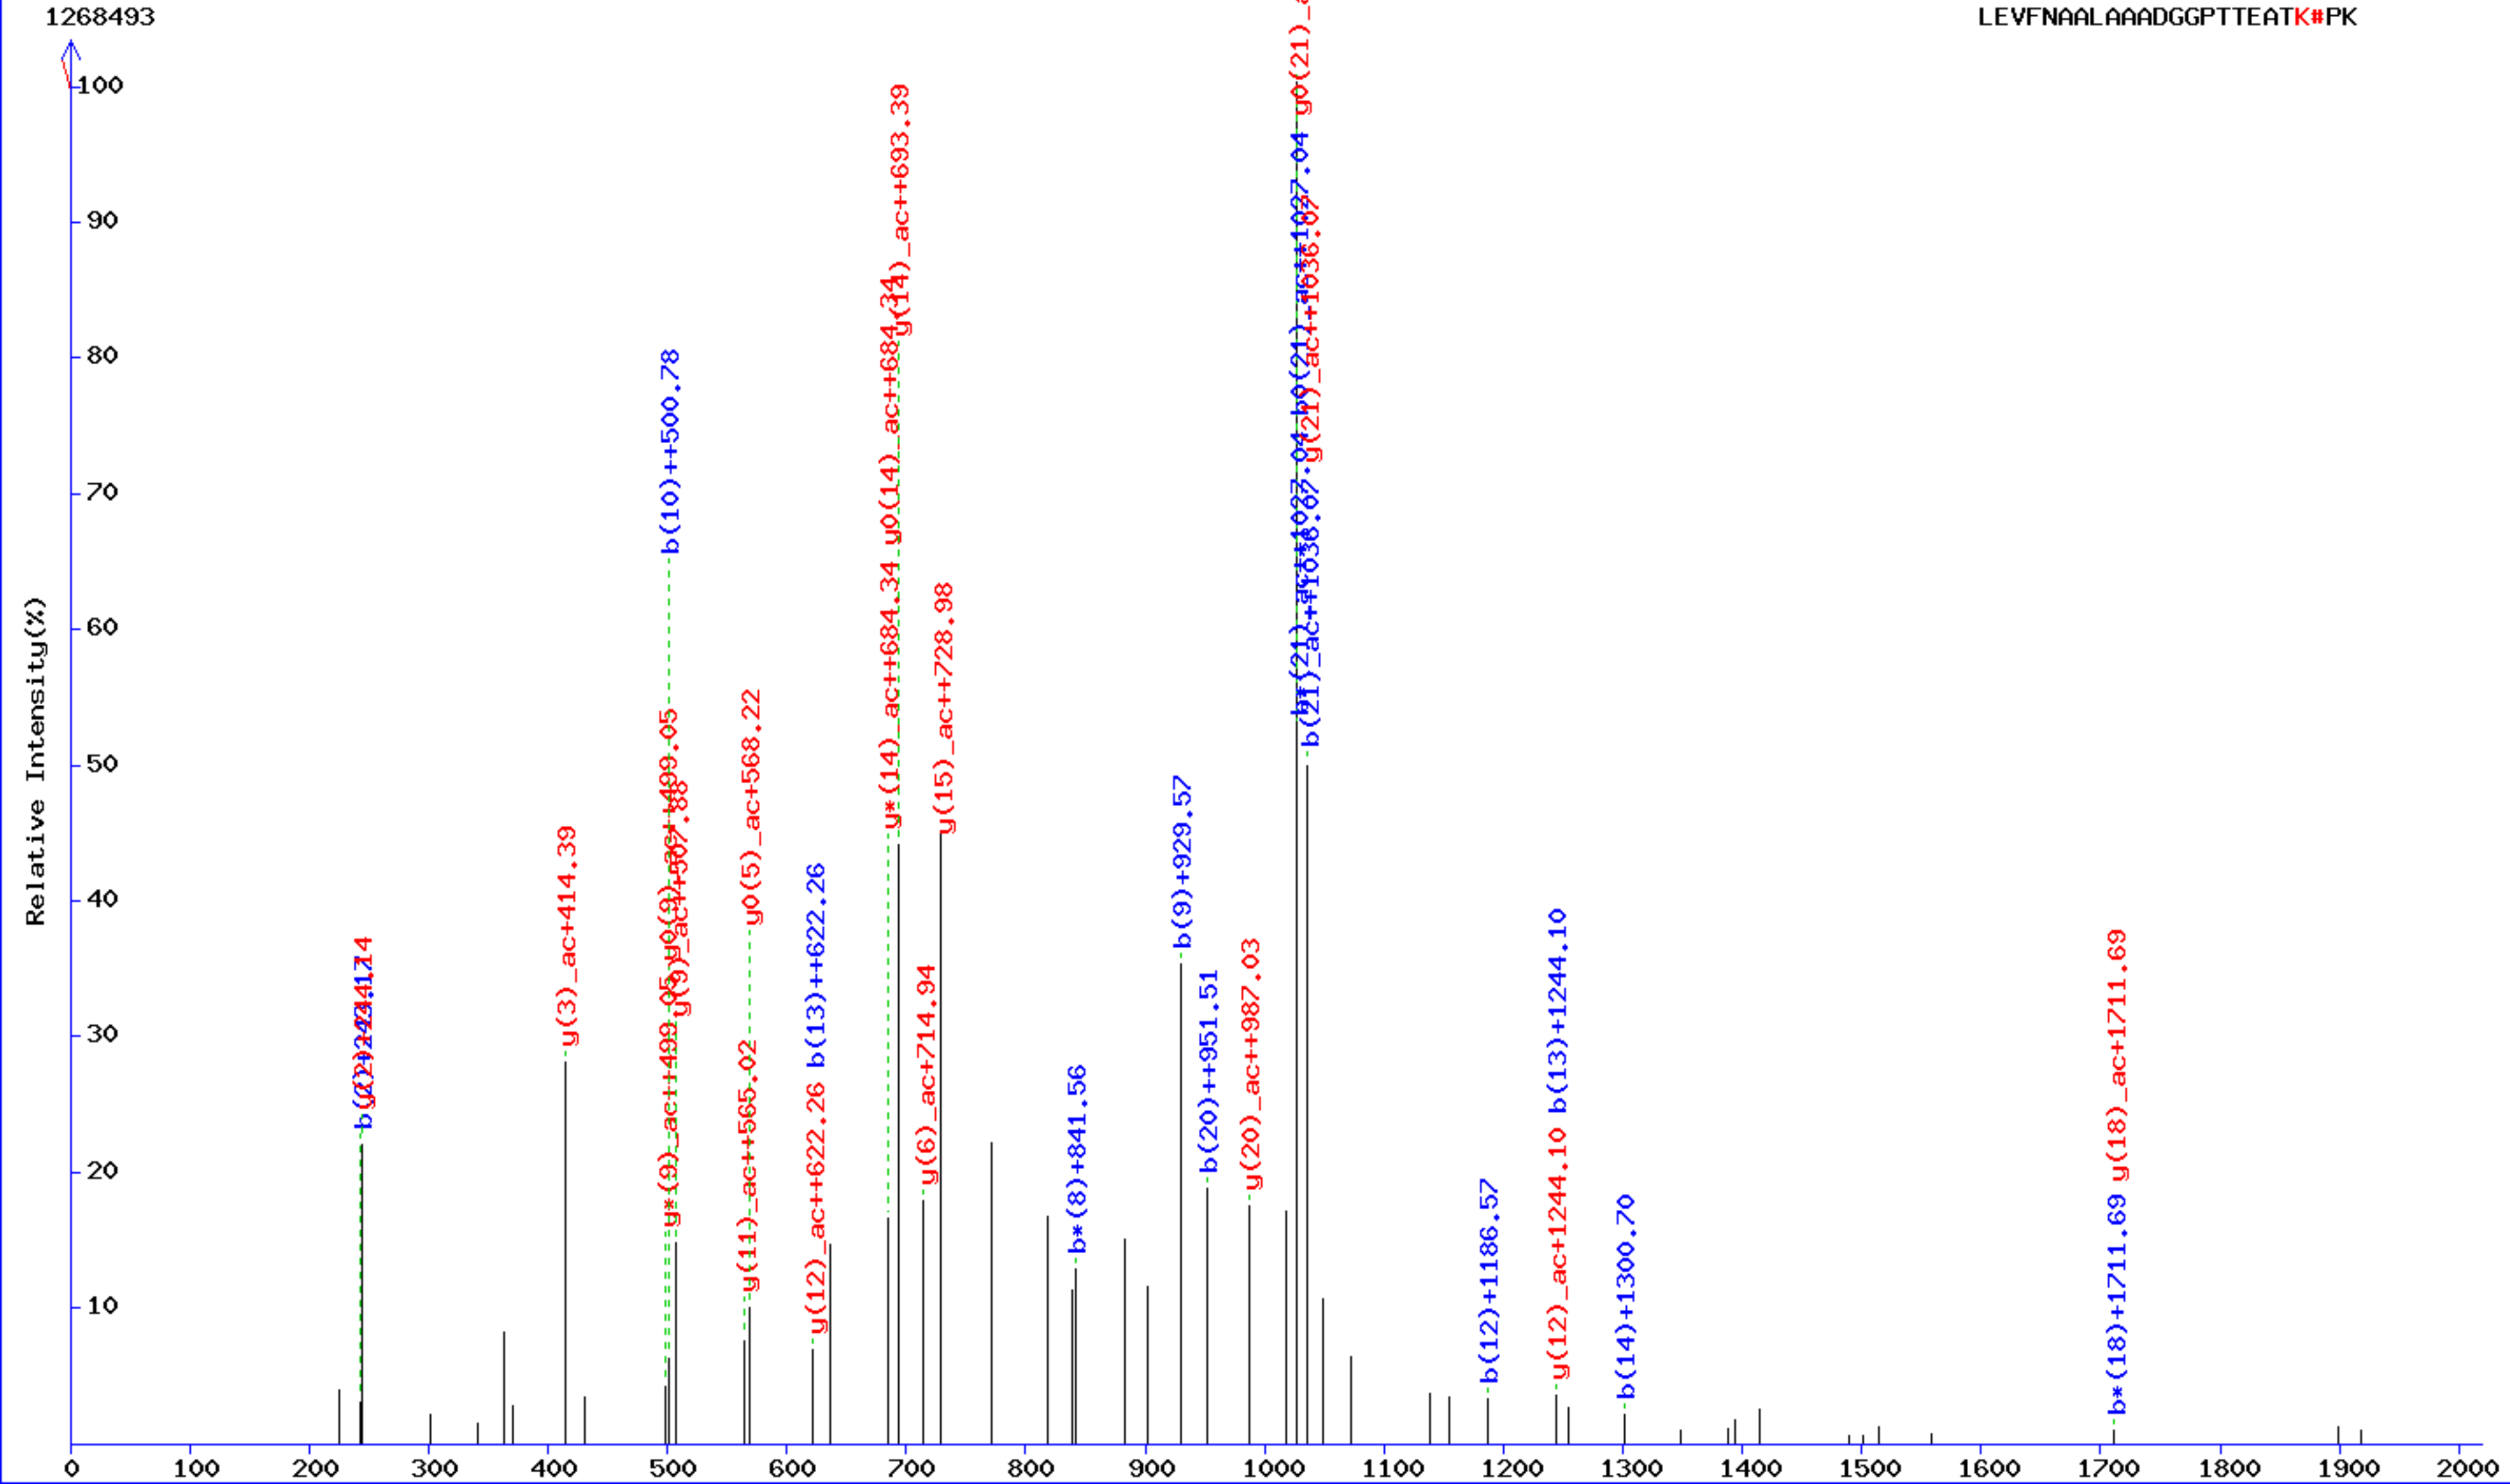



# gi|148661094 MRA\_1314 ATP synthase F0F1 subunit B

AEQQVASTLQTAHEQLK#R

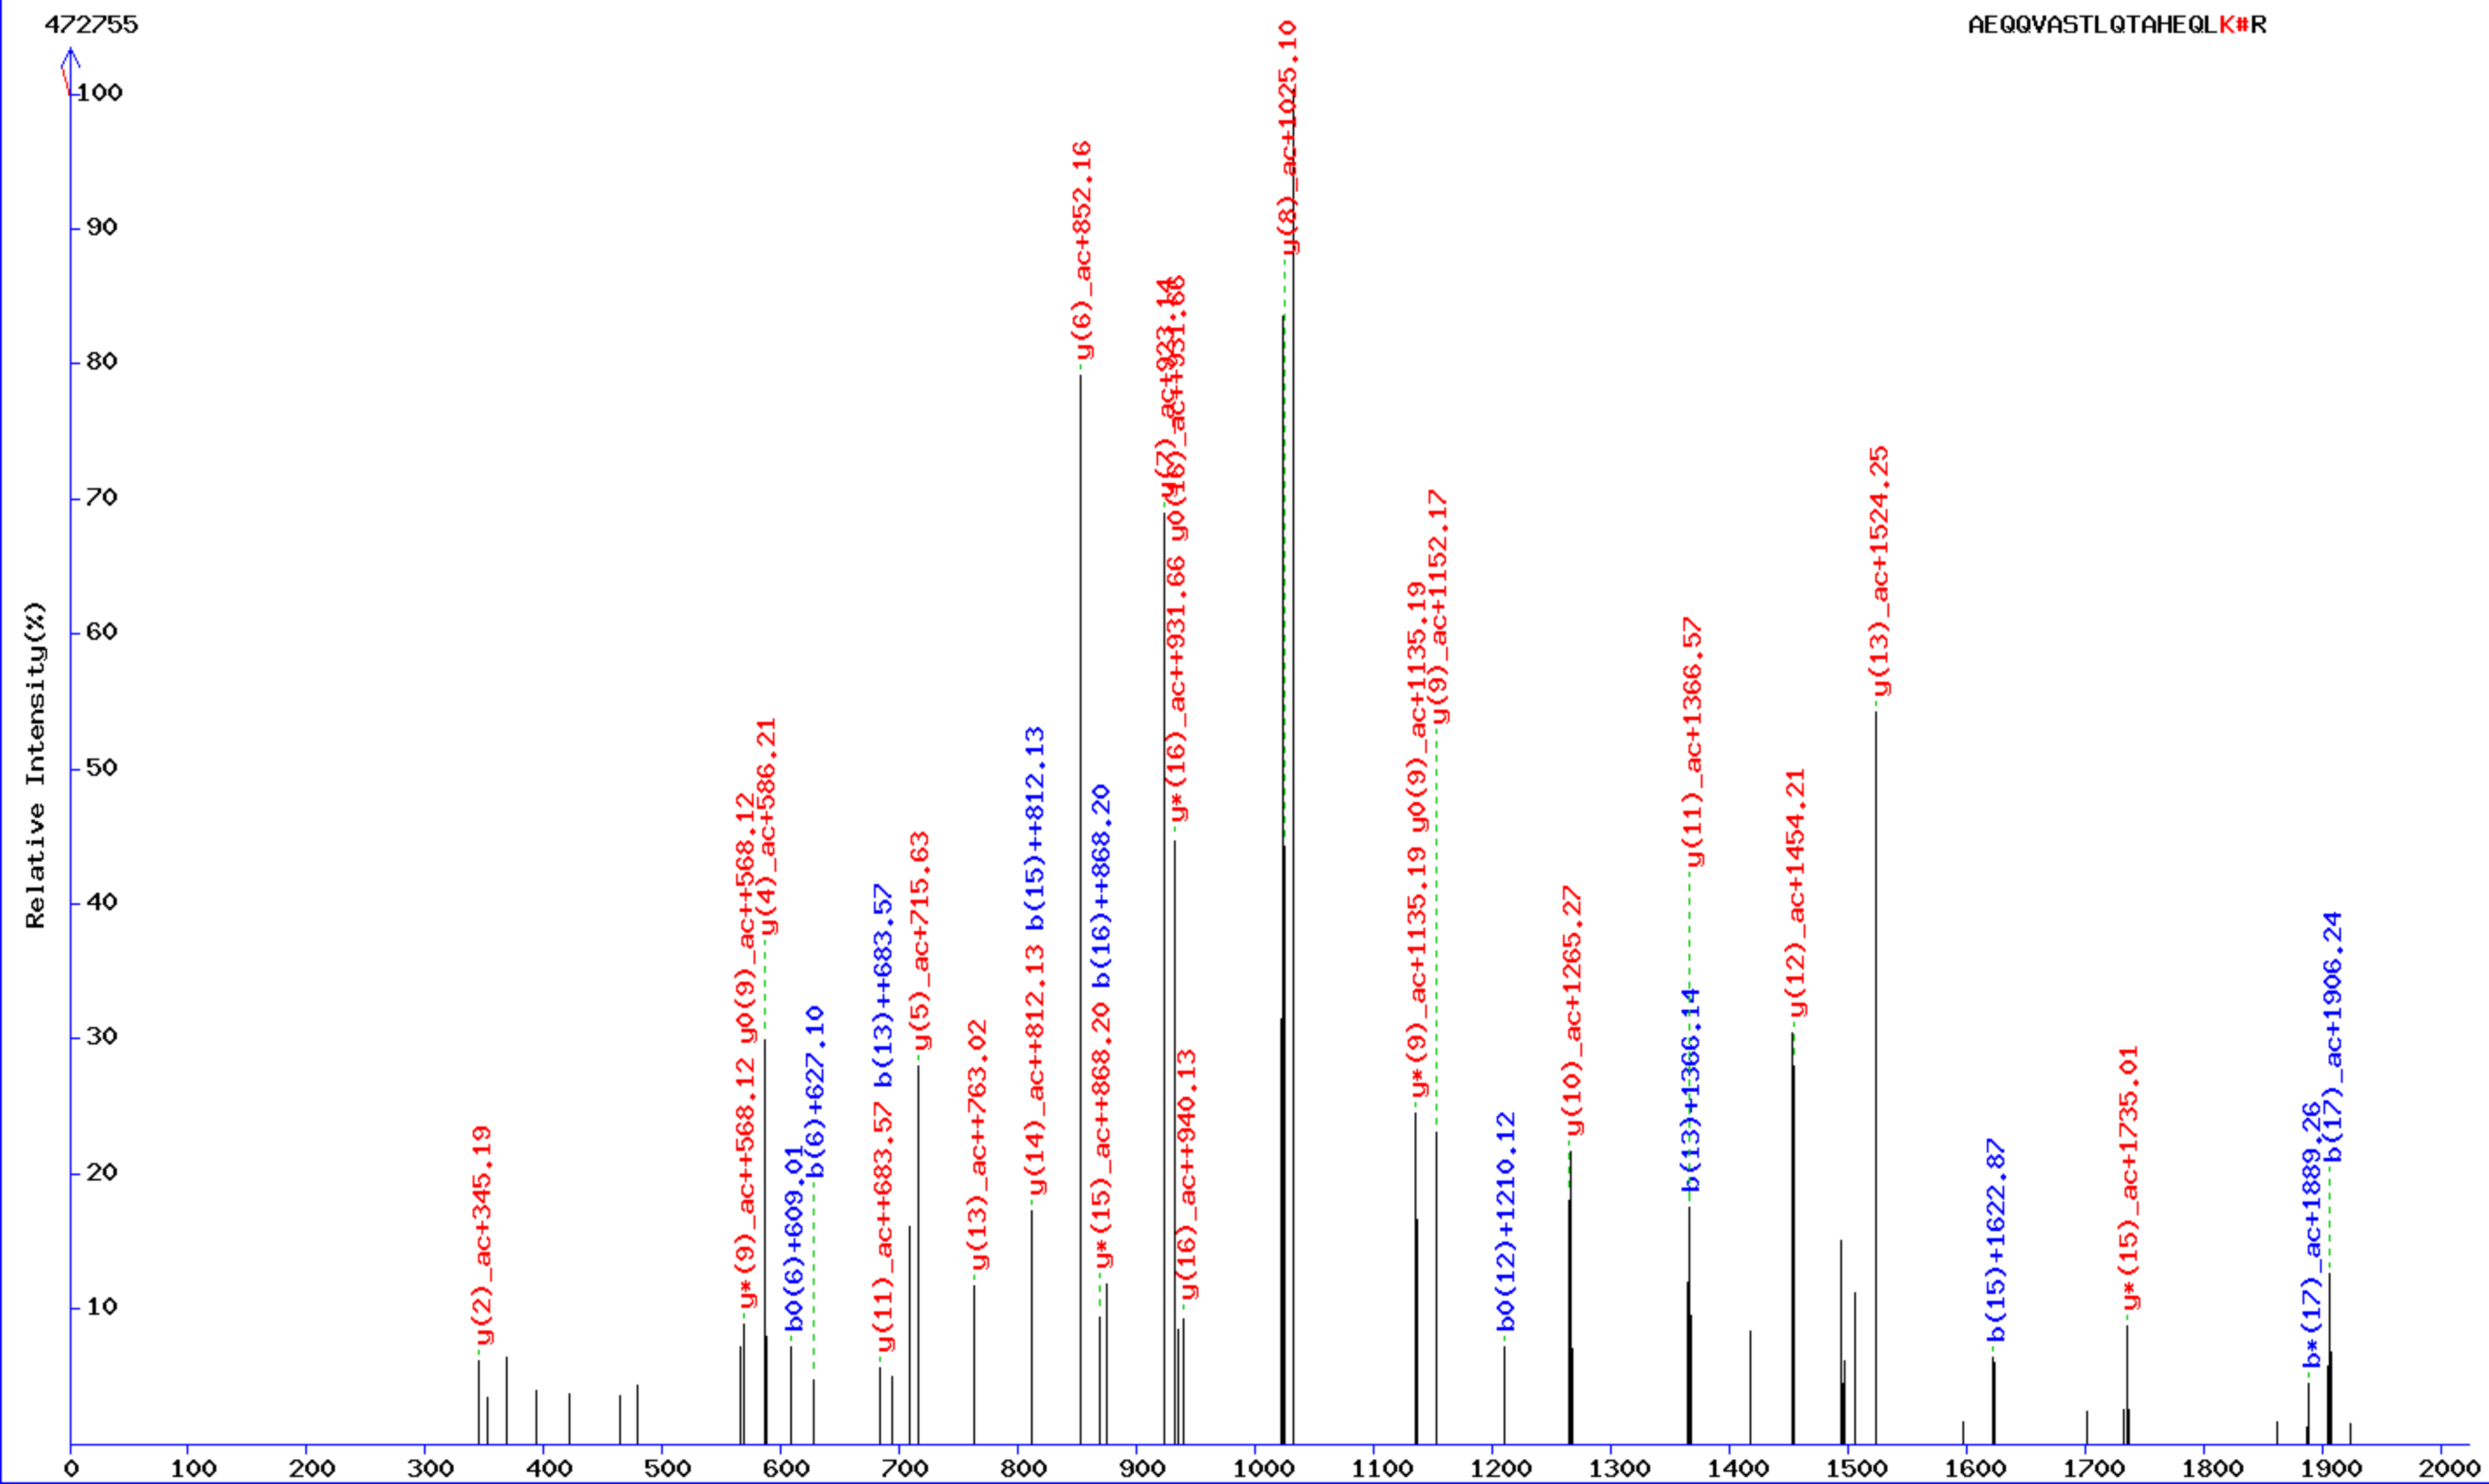

gi|148662003 MRA\_2202 long-chain-fatty-acid--CoA ligase

VFEK#VYNTAEQNAANAGK

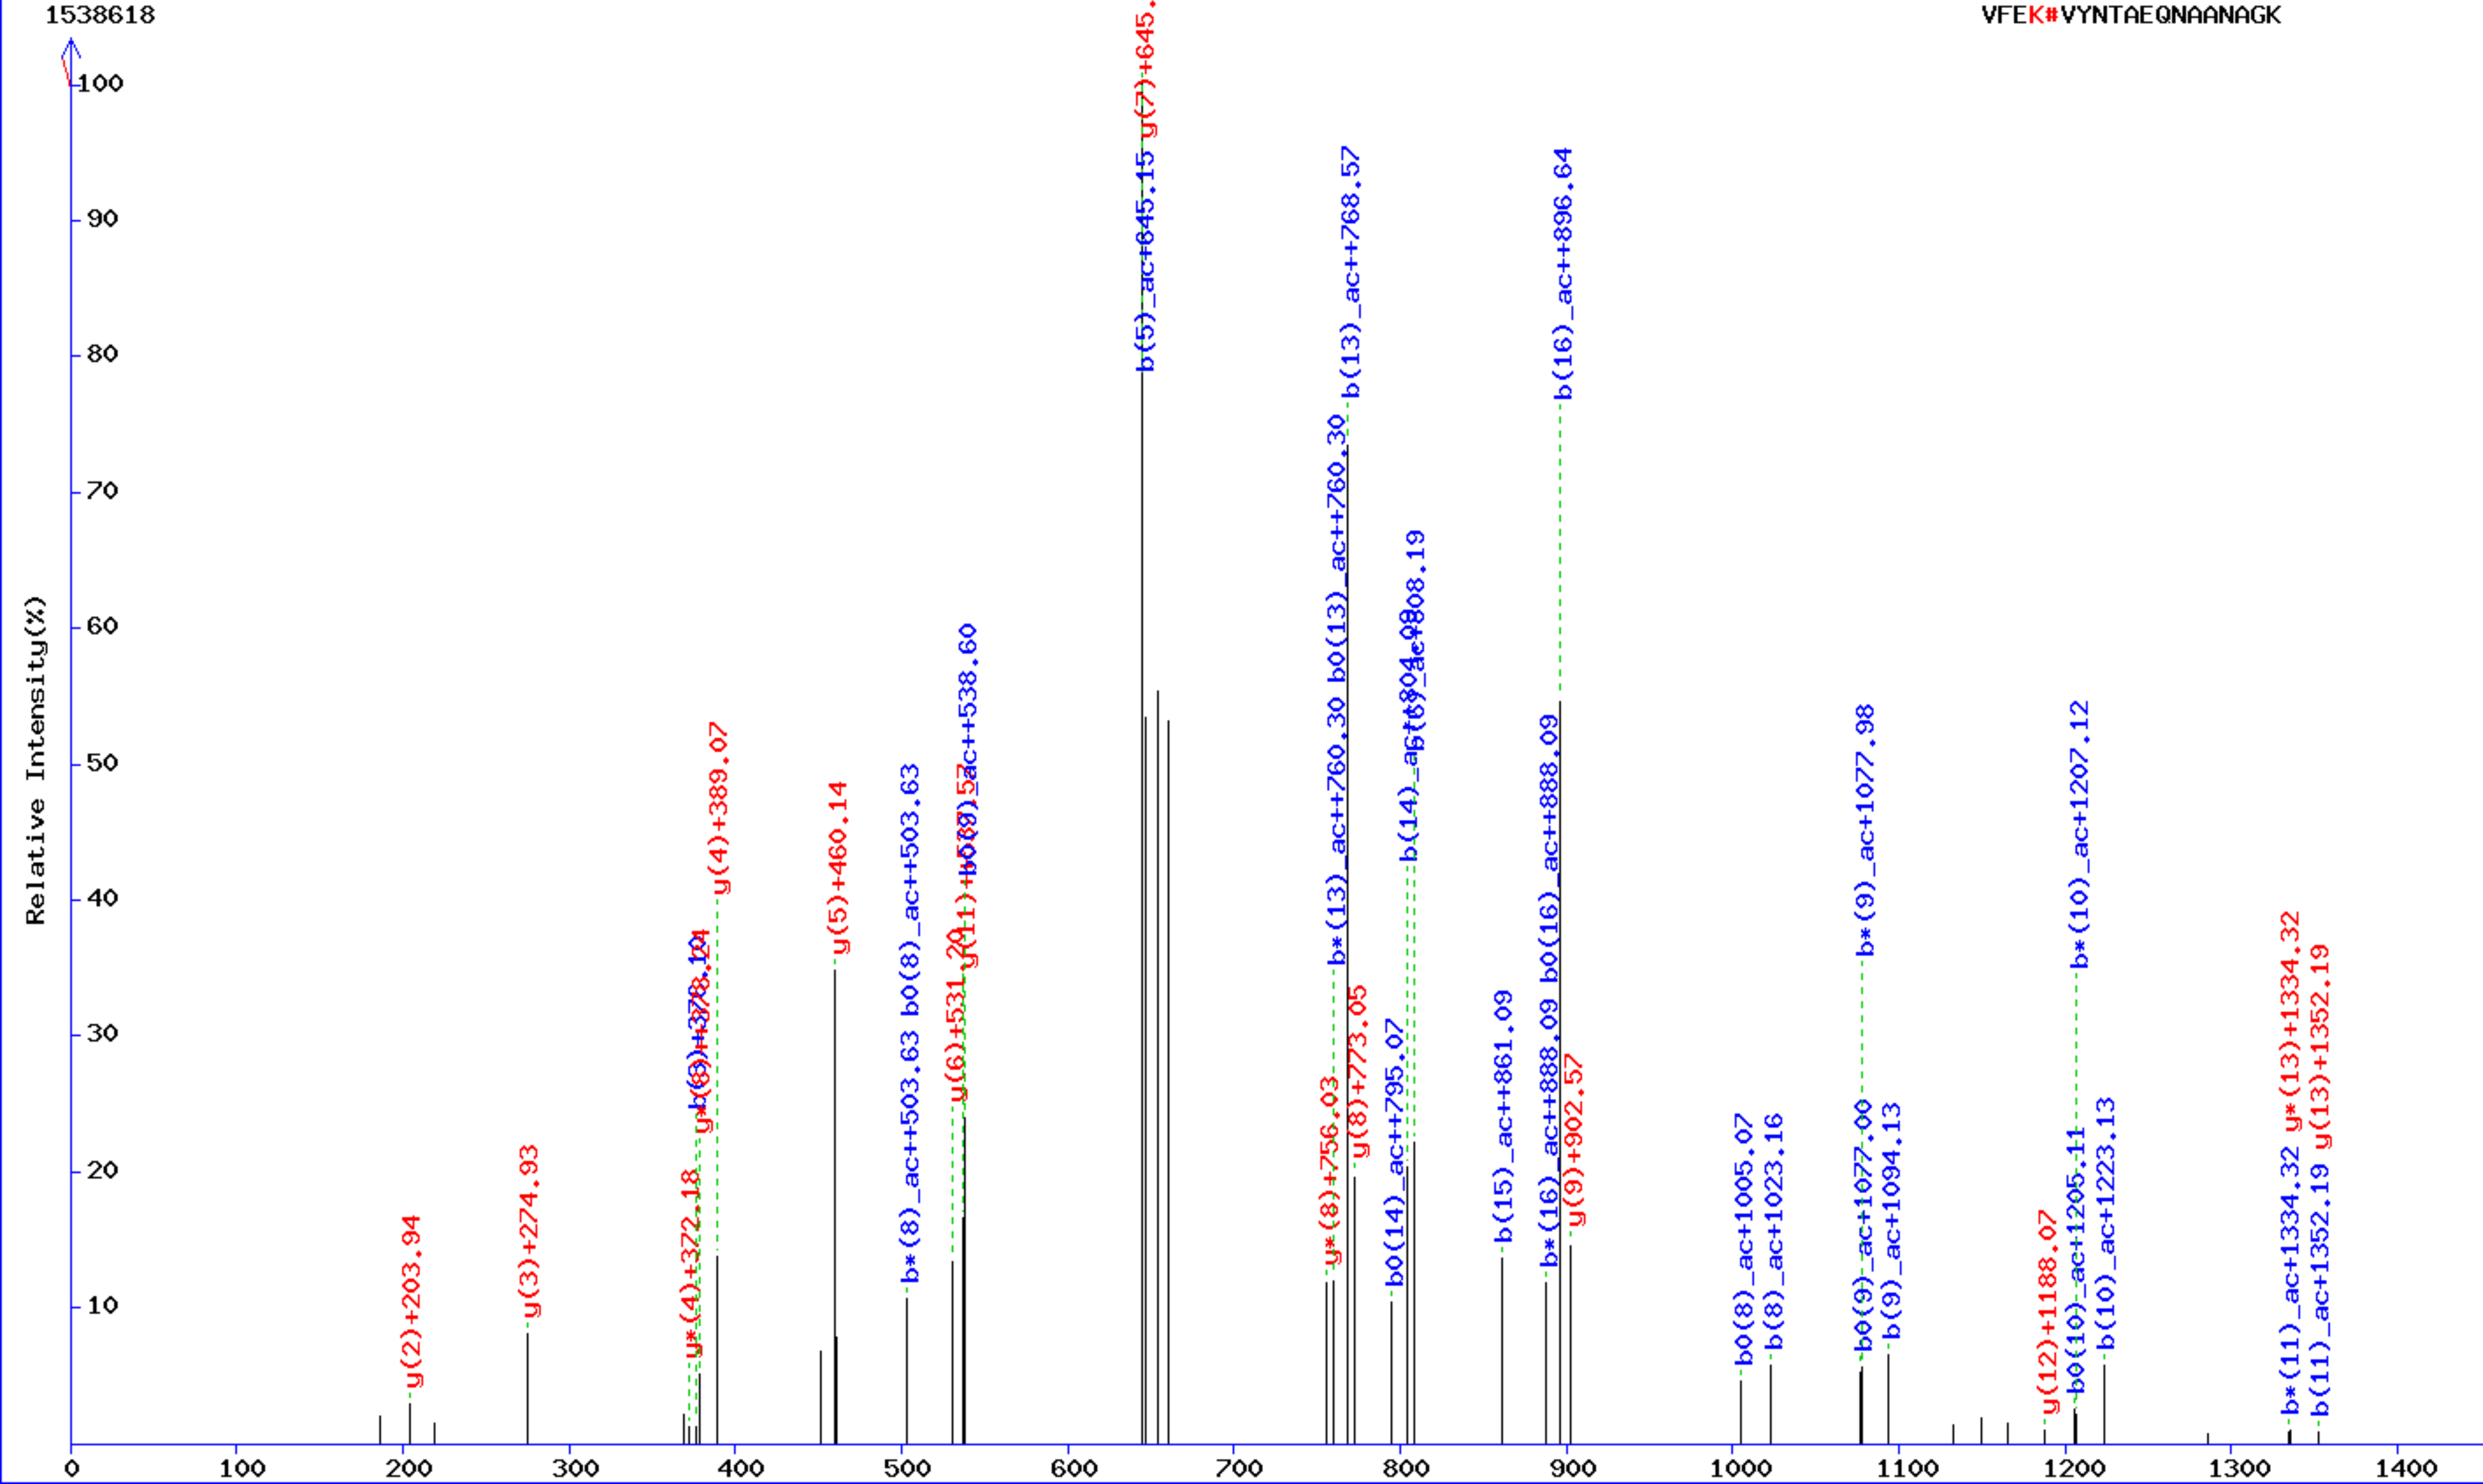

# gi|148660410 MRA\_0647 (3R)-hydroxyacyl-ACP dehydratase subunit HadB

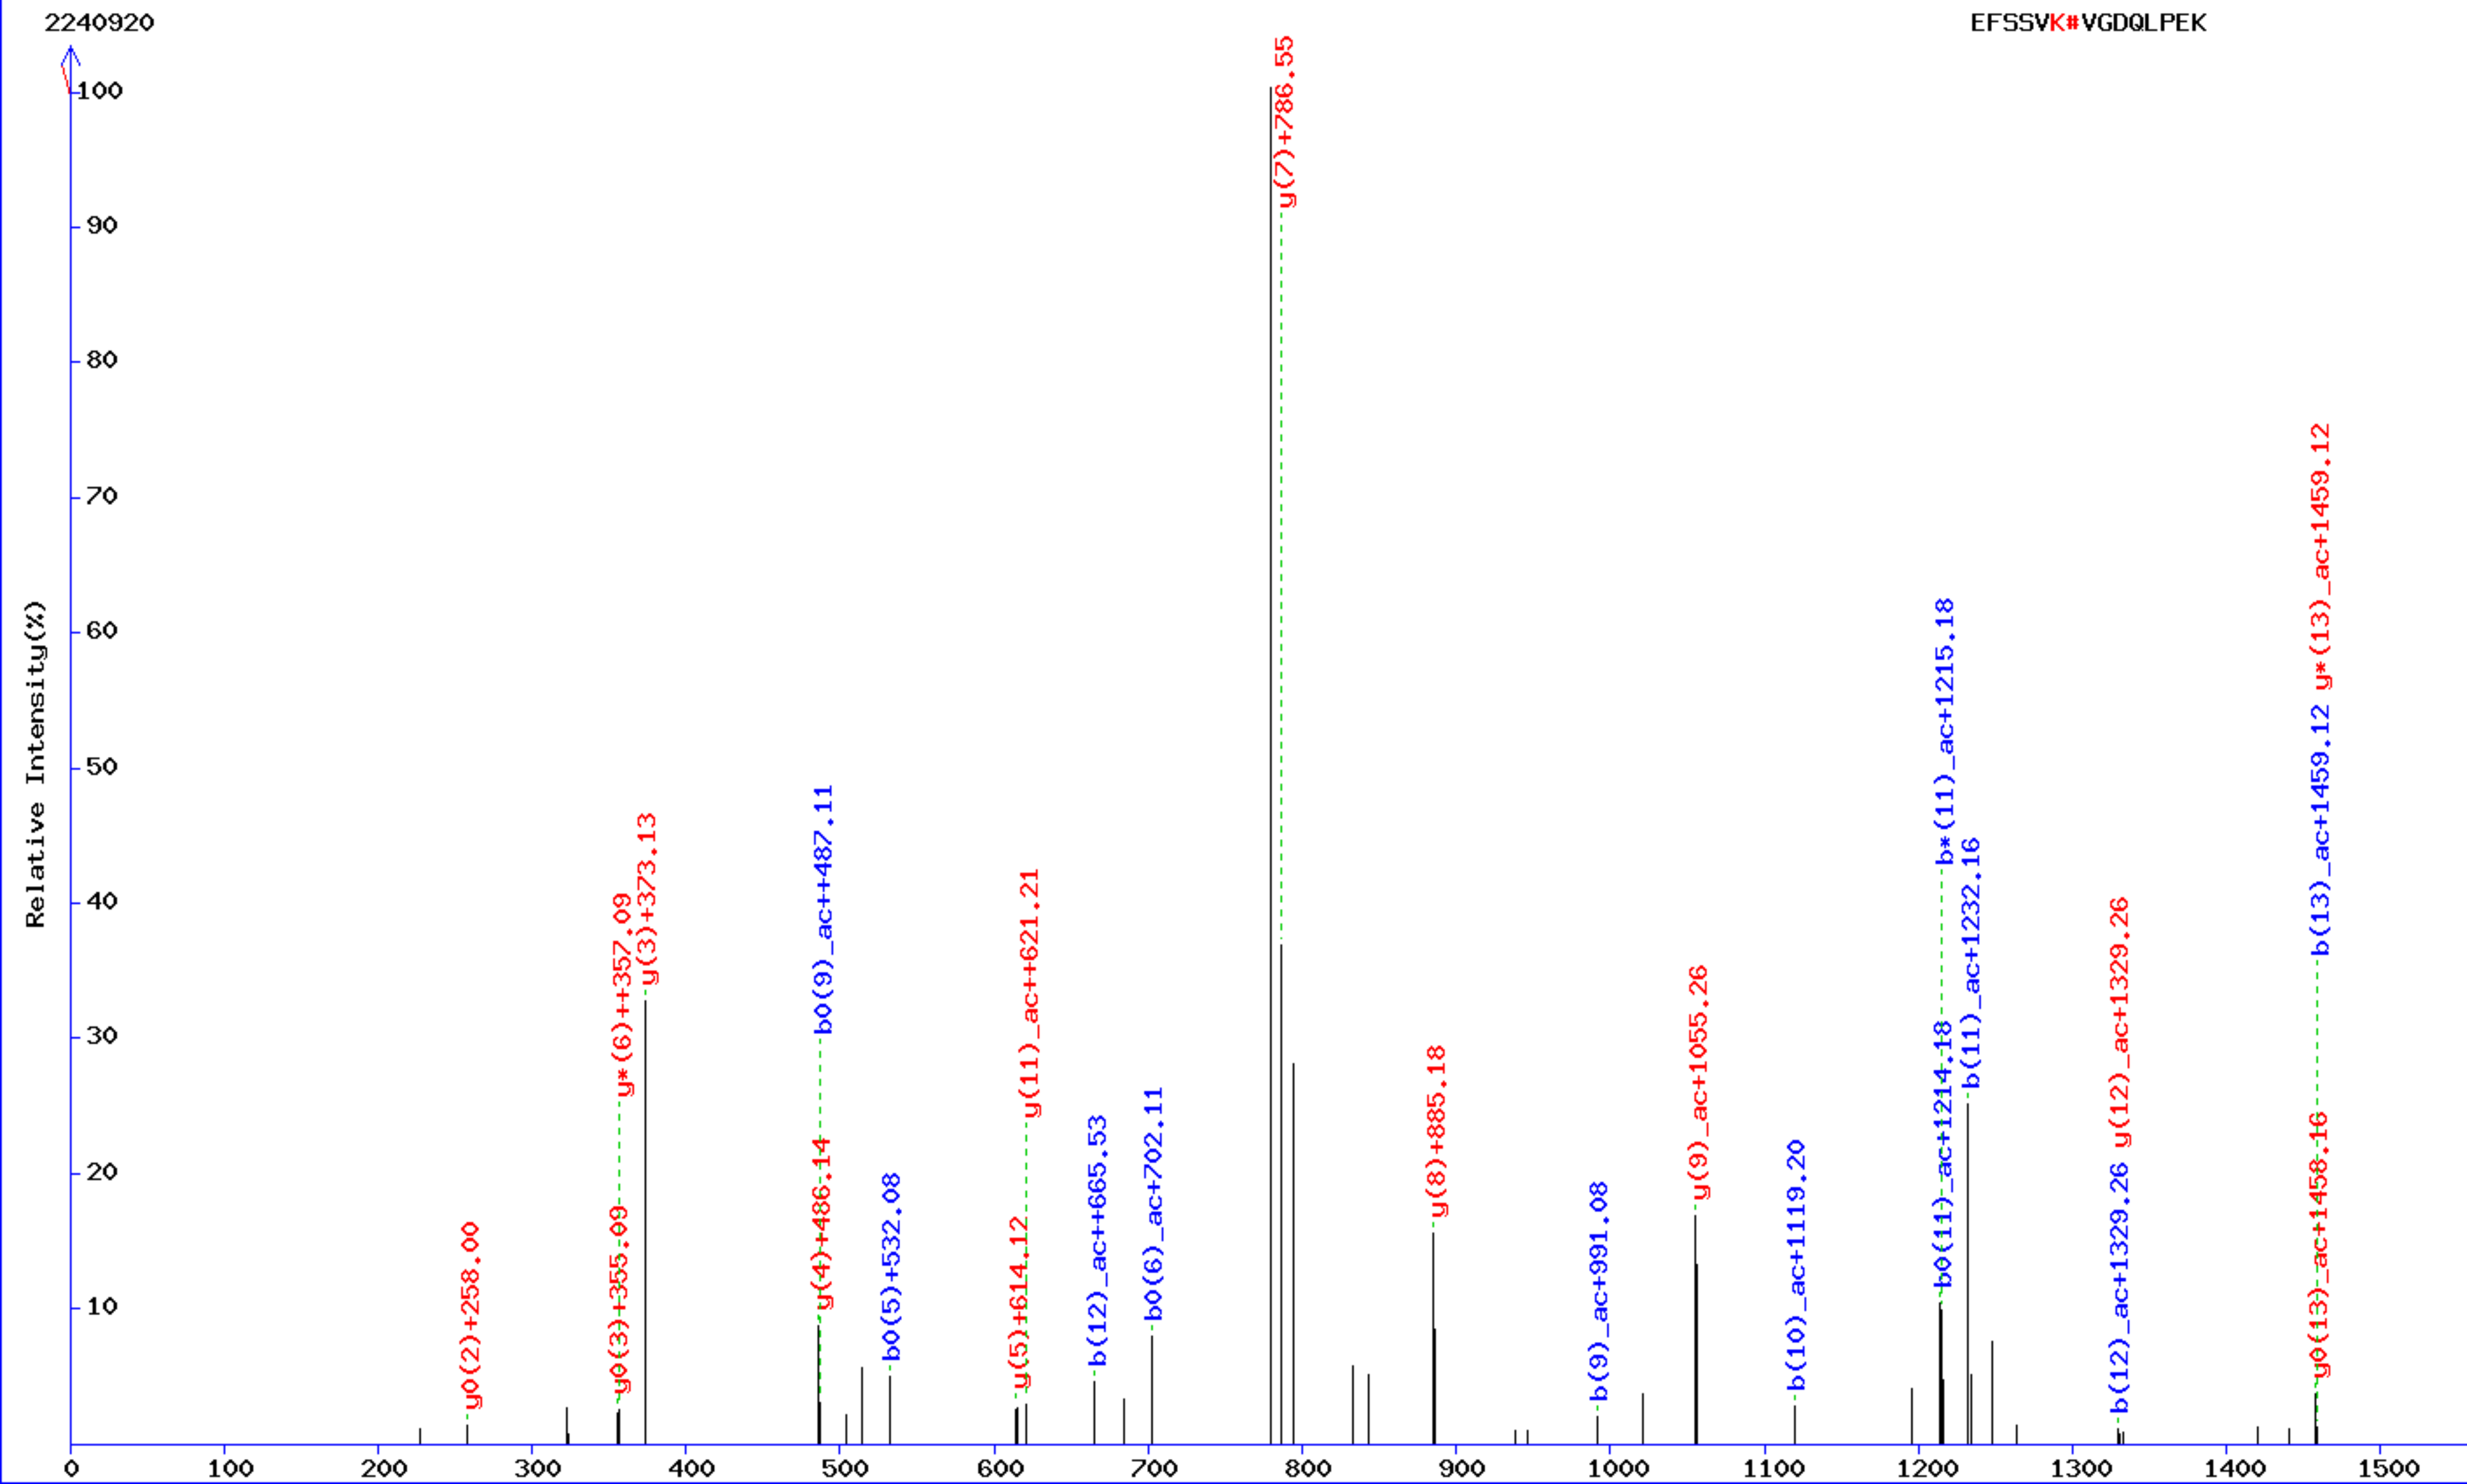

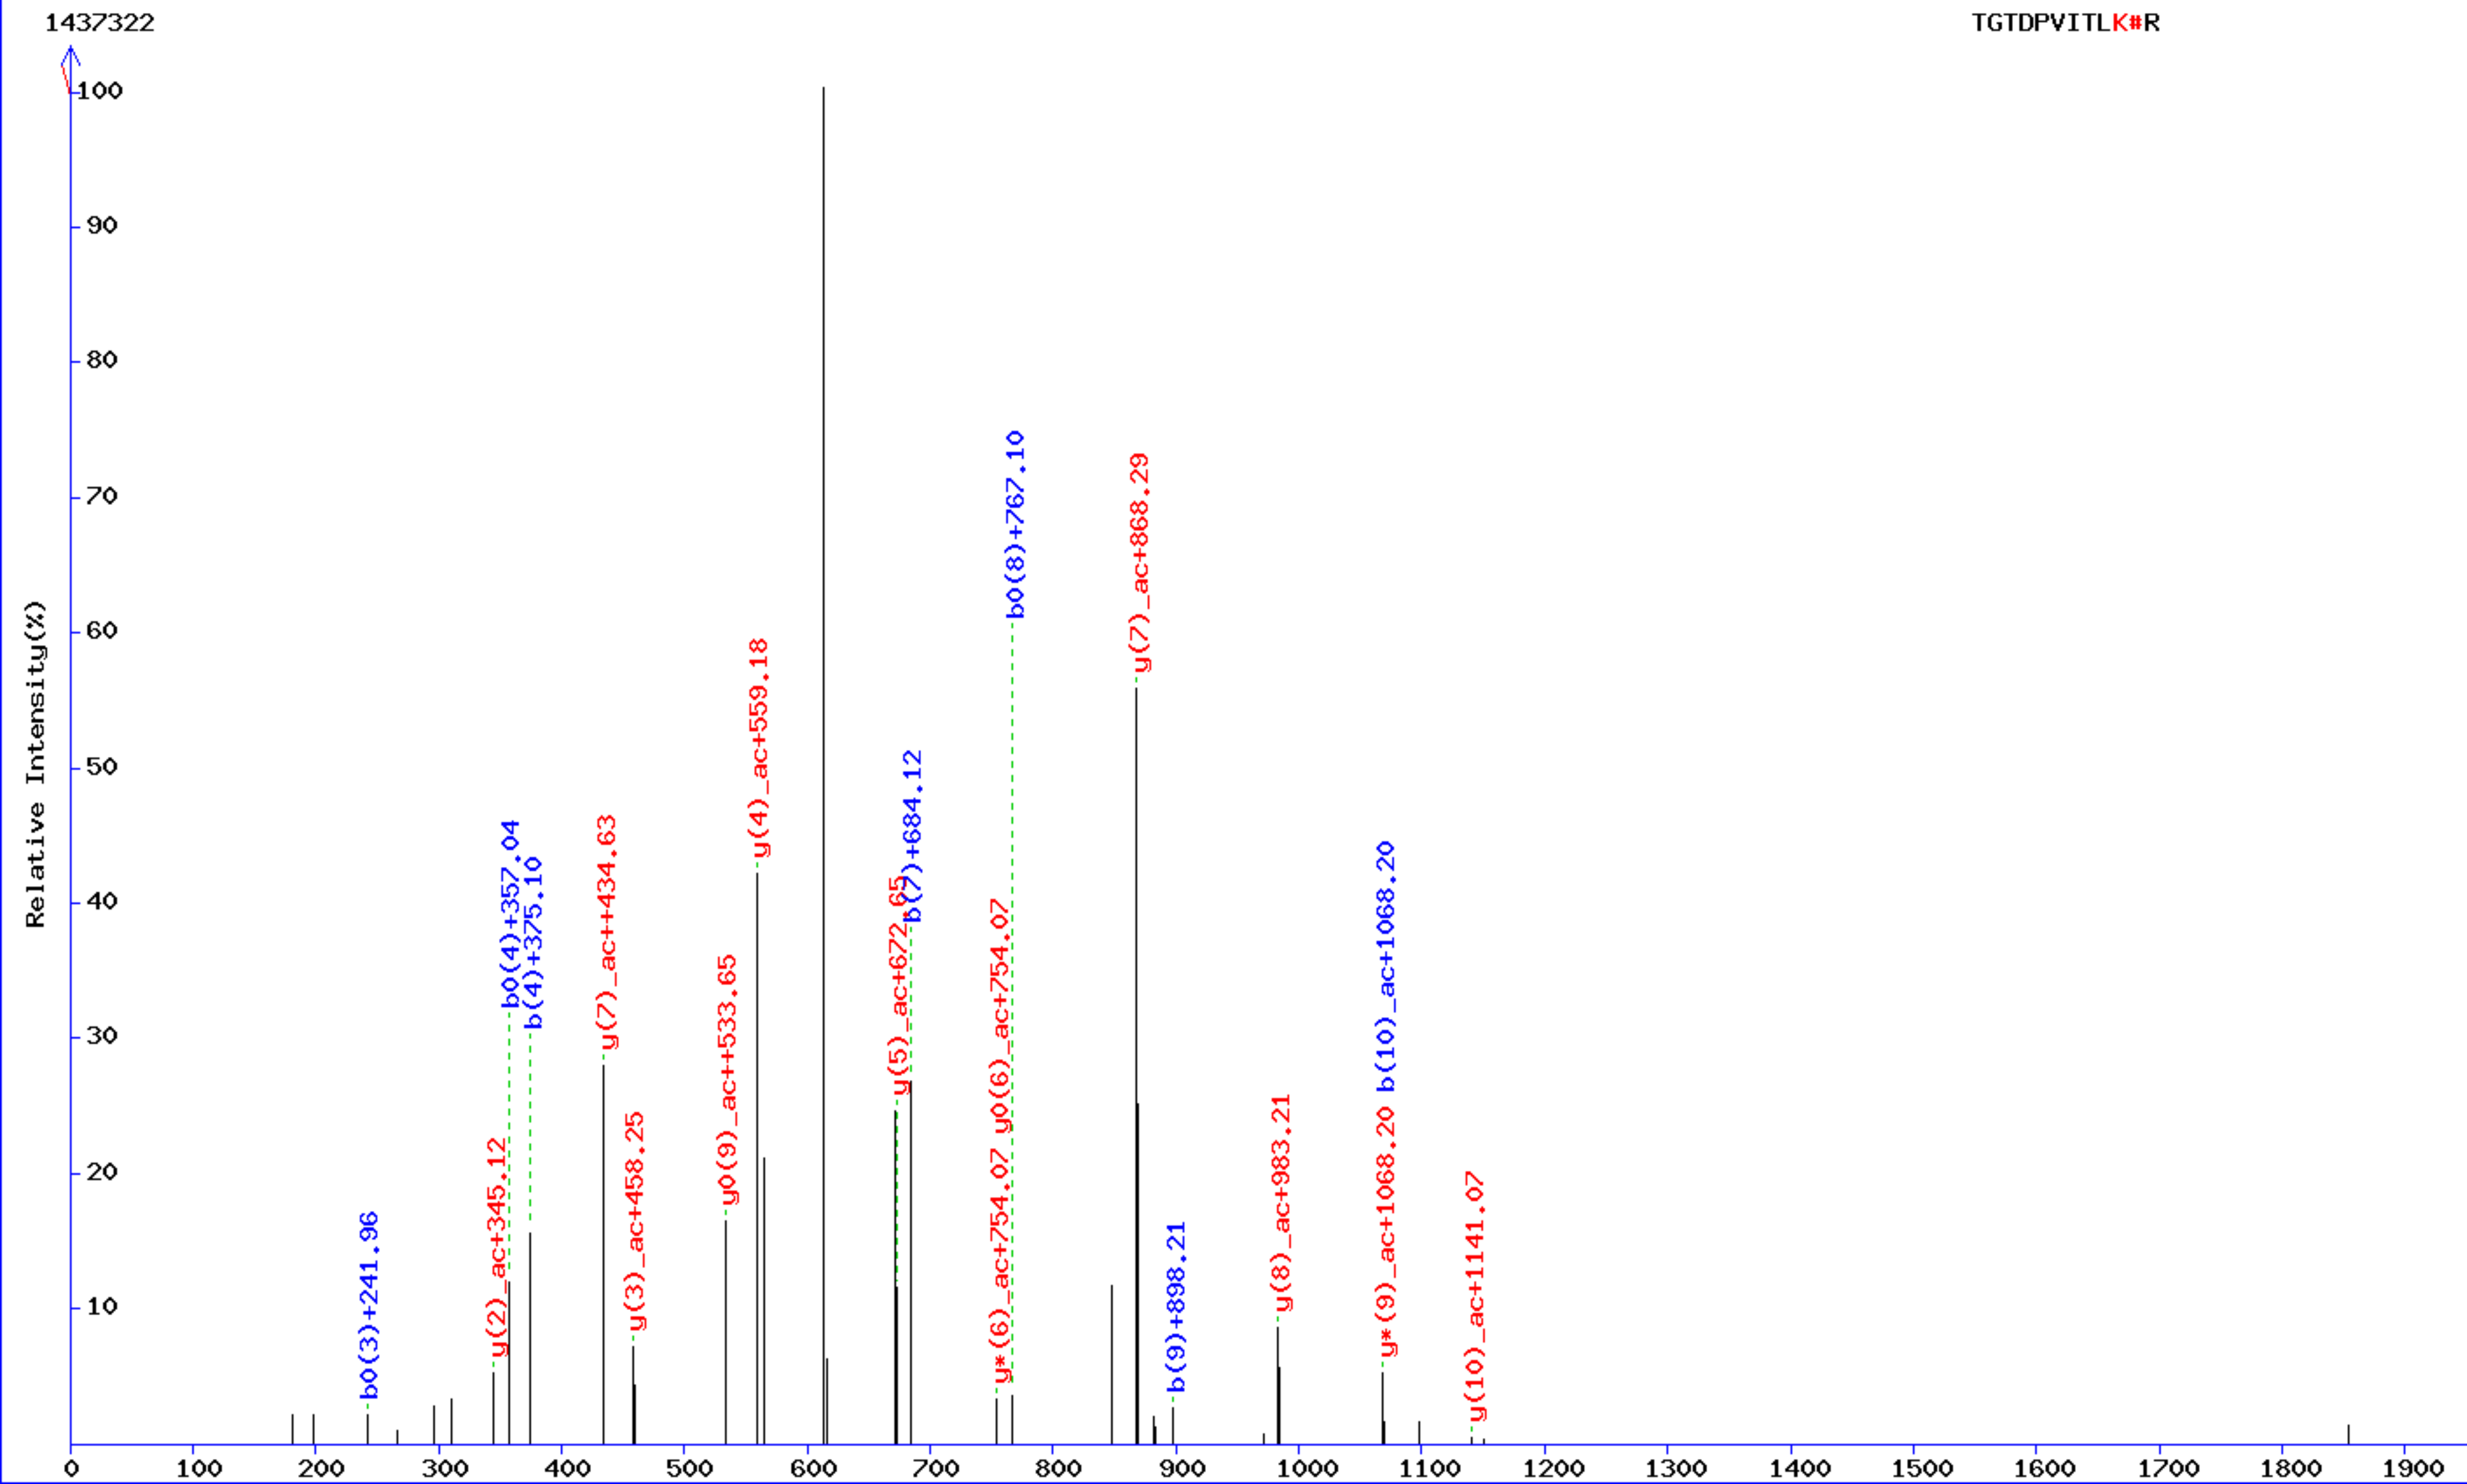

# gi|148660460 MRA\_0694 elongation factor Tu

TTLTAAITK#VLHDK

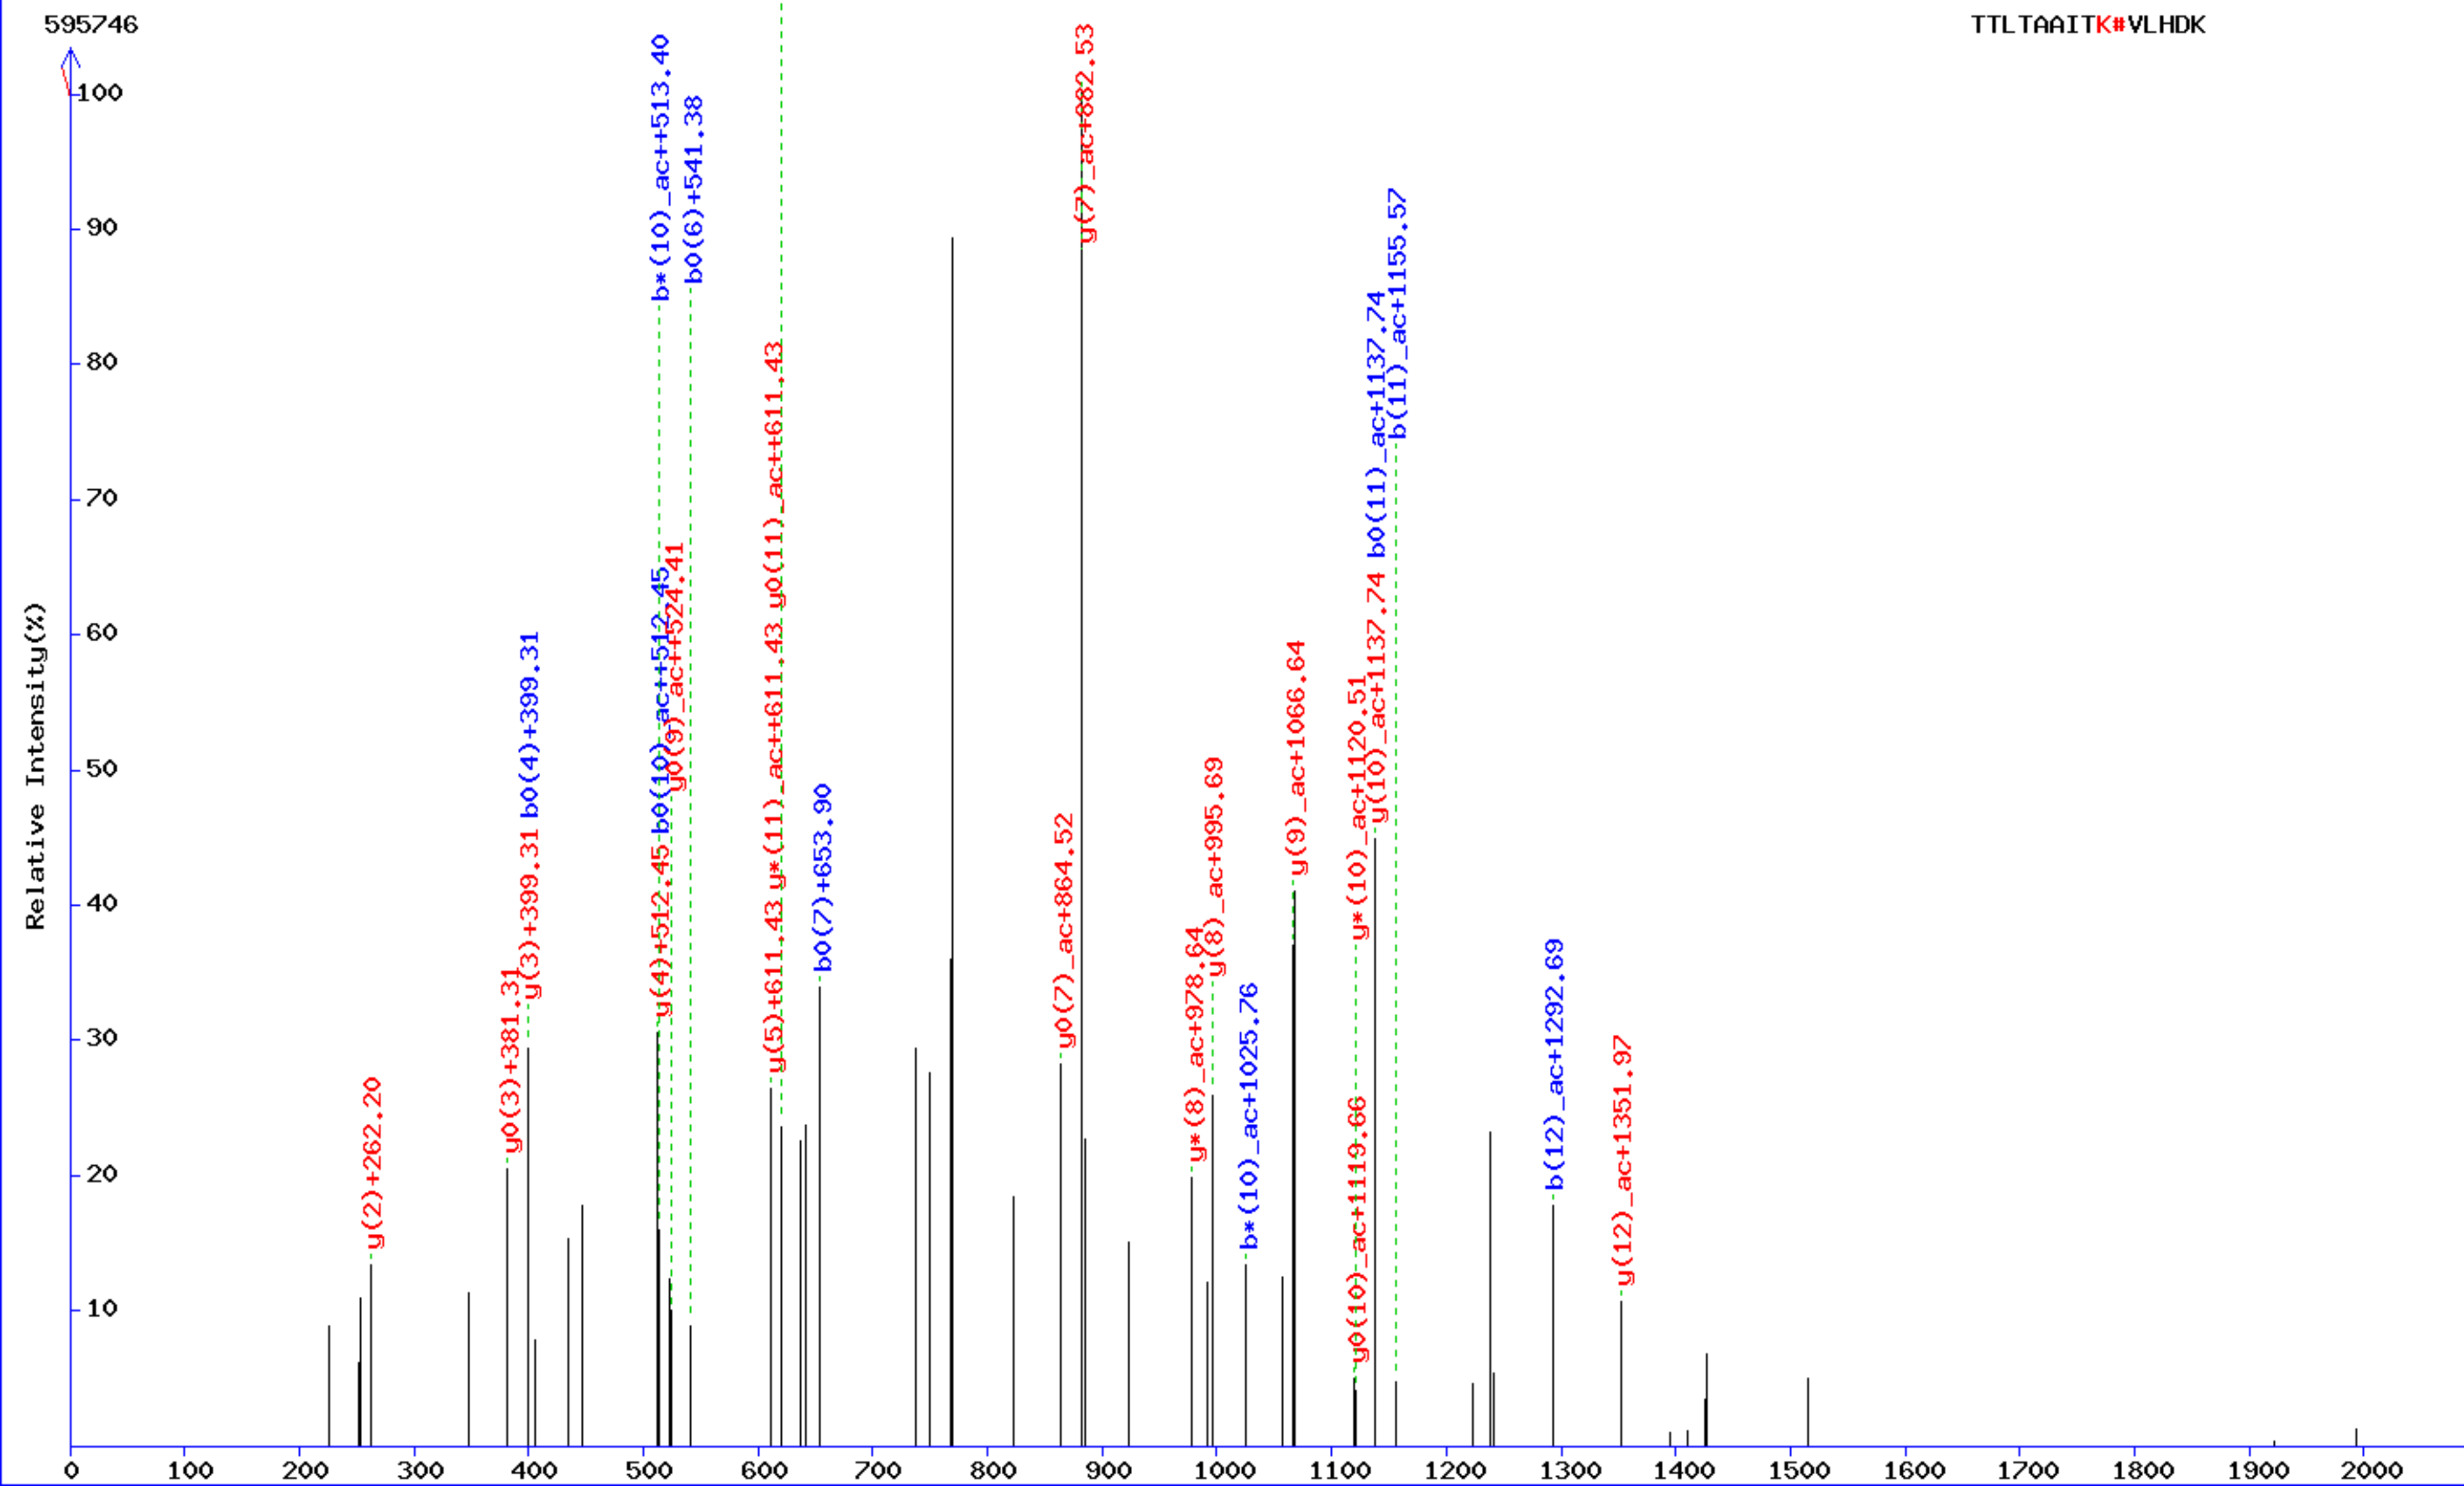

# gi|148660661 MRA\_0891 phosphoserine aminotransferase

SLHLYGEGFSAK#FASAVSK

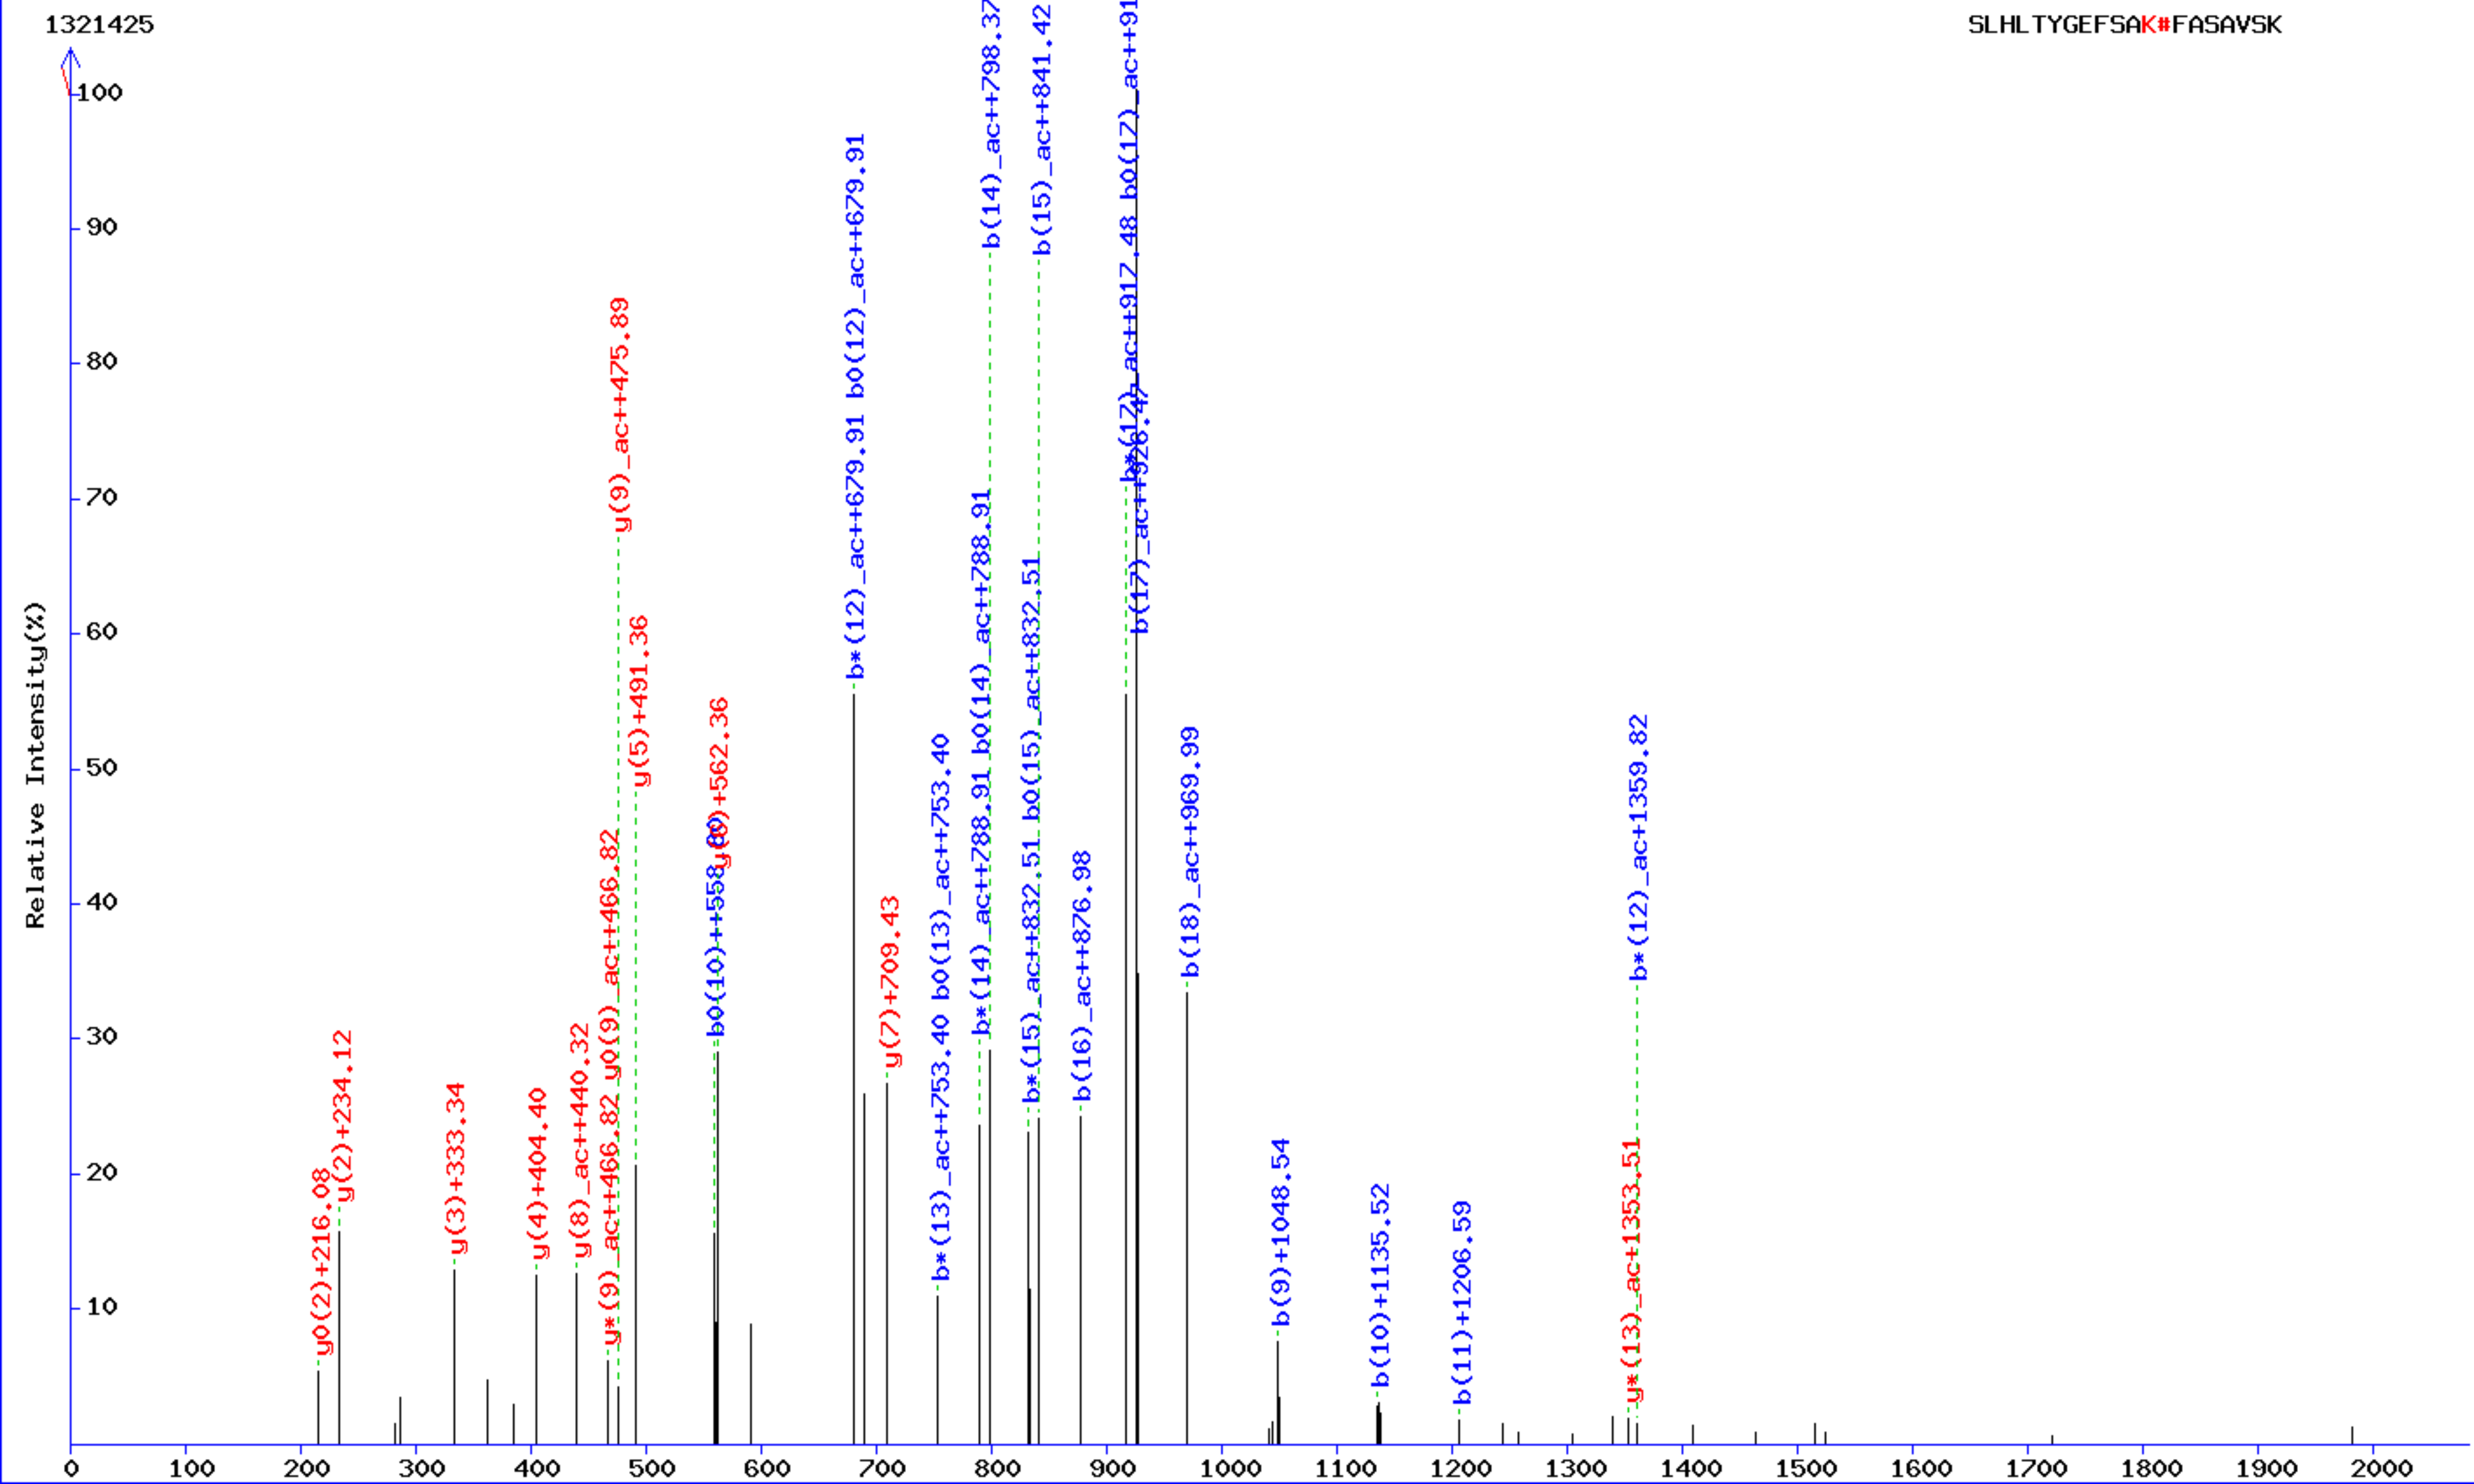

# gi|148660035 MRA\_0278 acyl-CoA synthetase

VIIYDDEYTK#AVSLAQPLGK

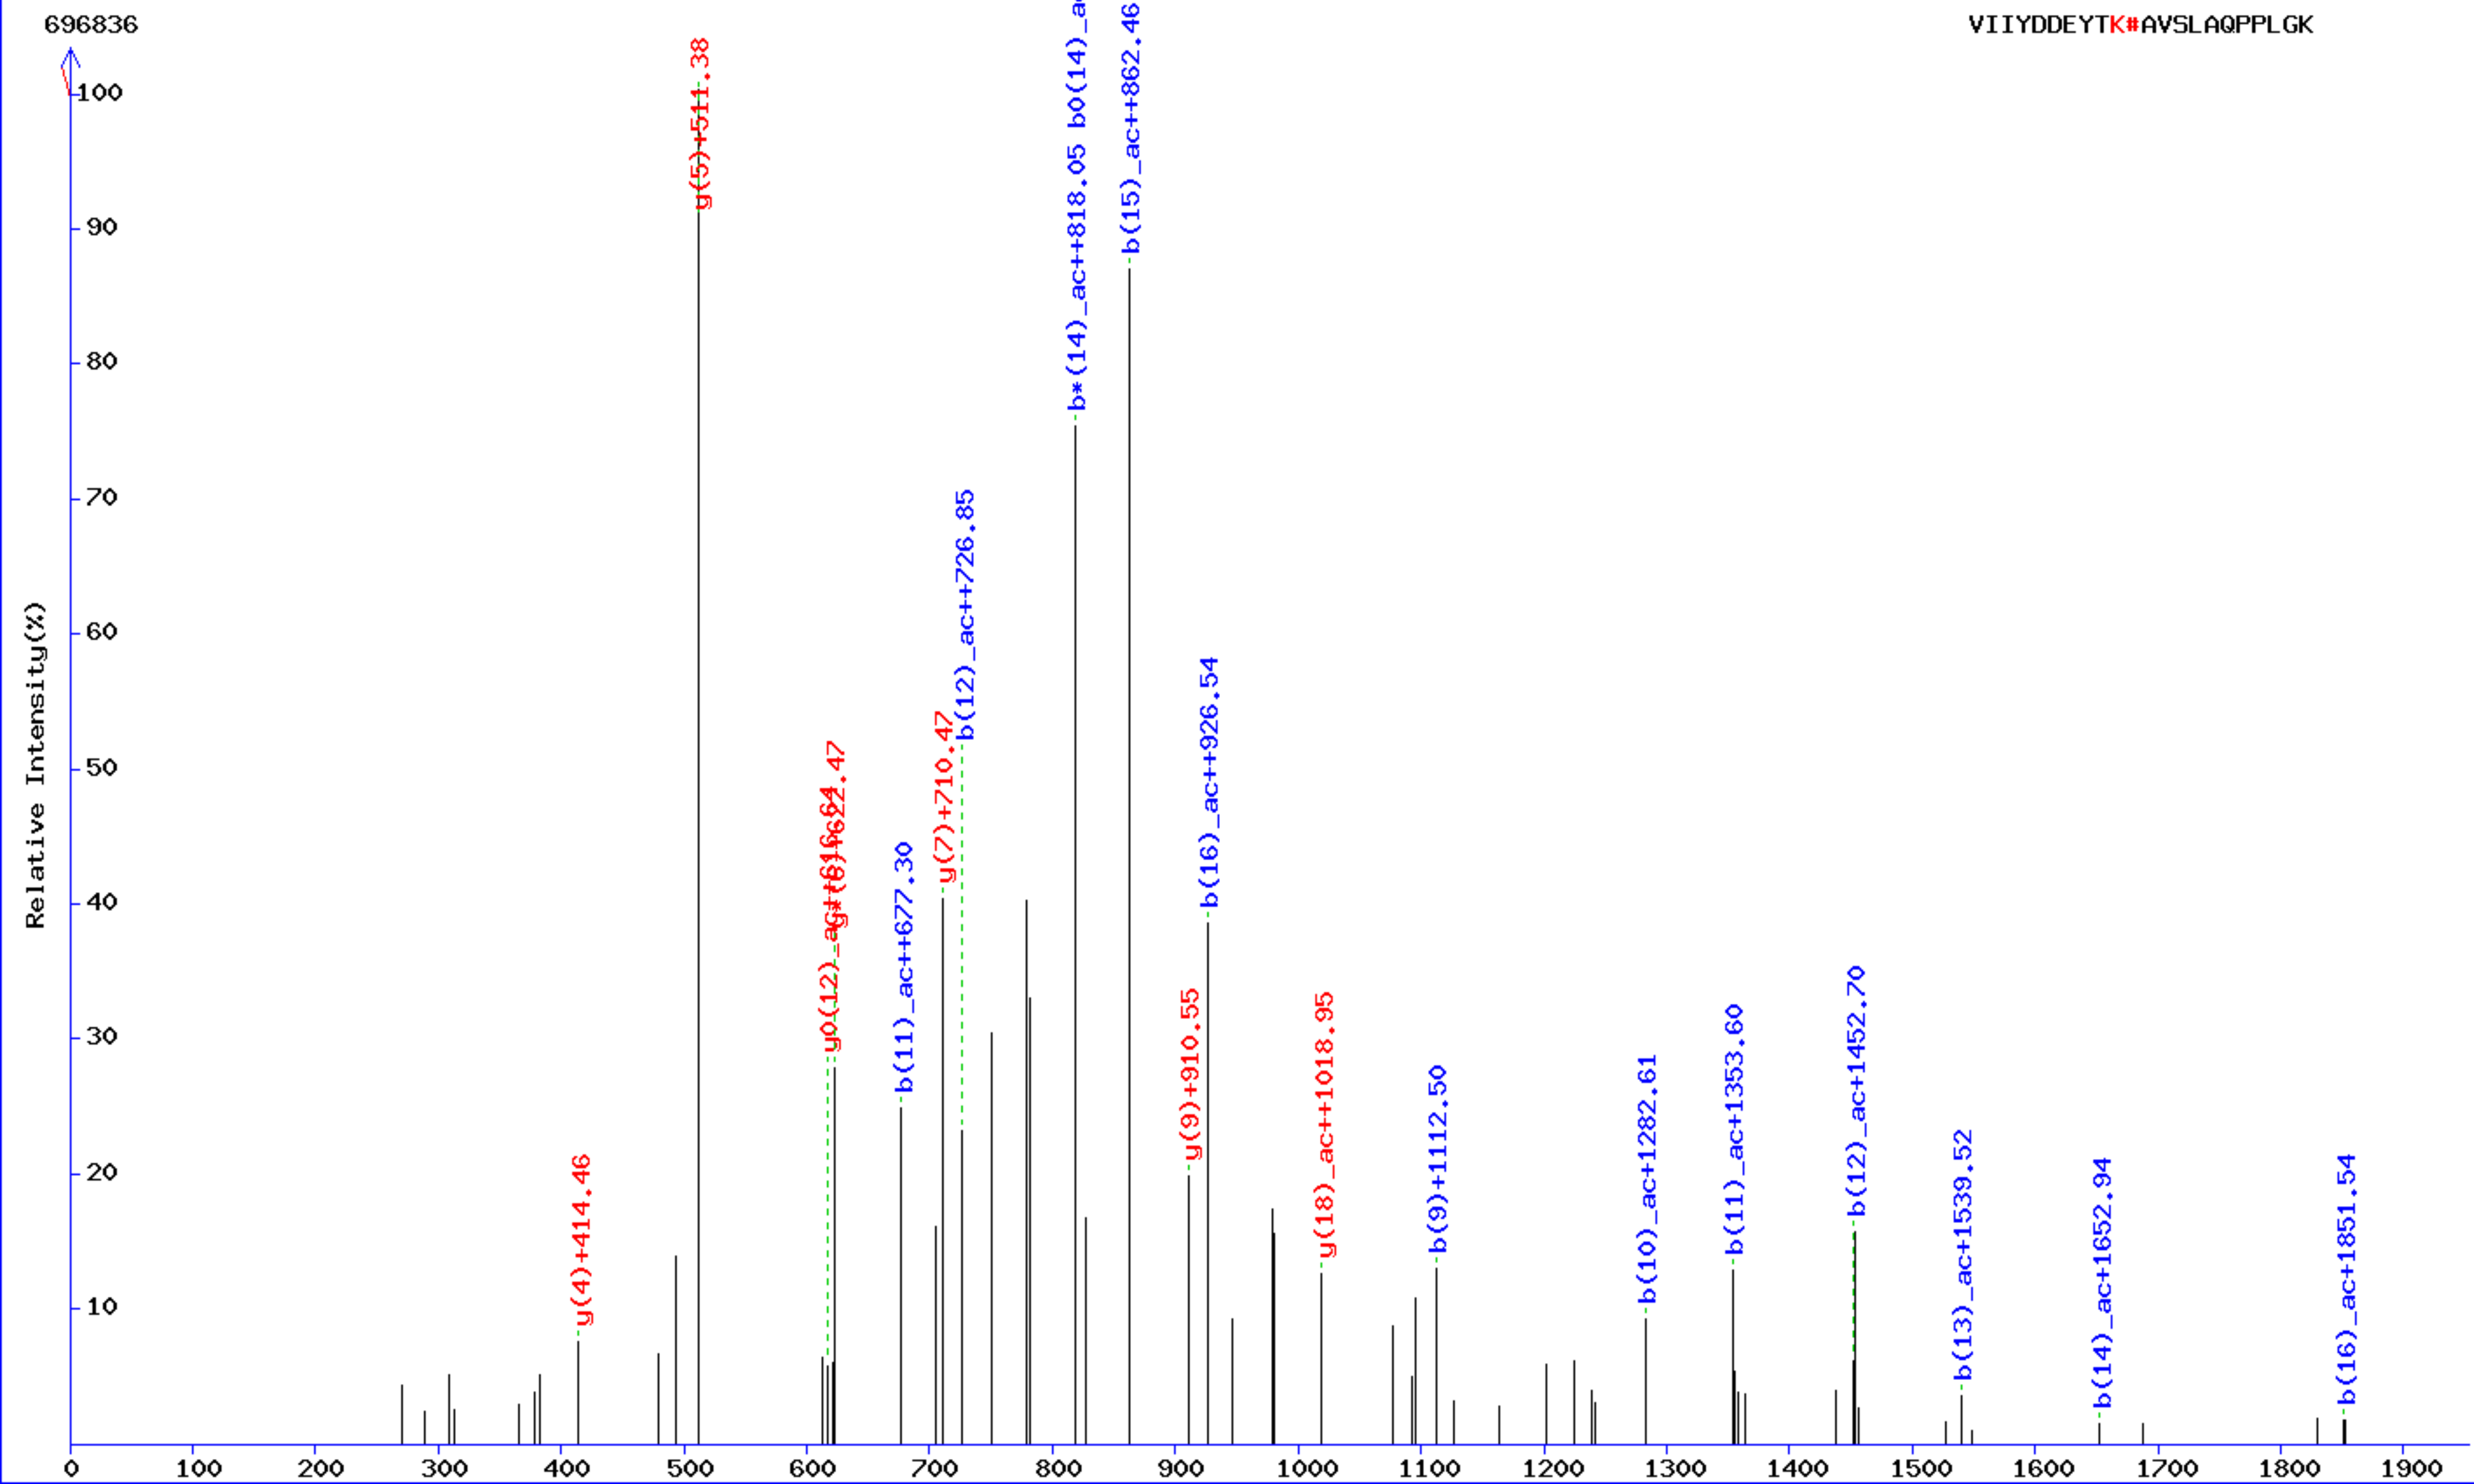

# gi|148661530 MRA\_1742 hypothetical protein

PVNPDRPSIGCGIK#WR

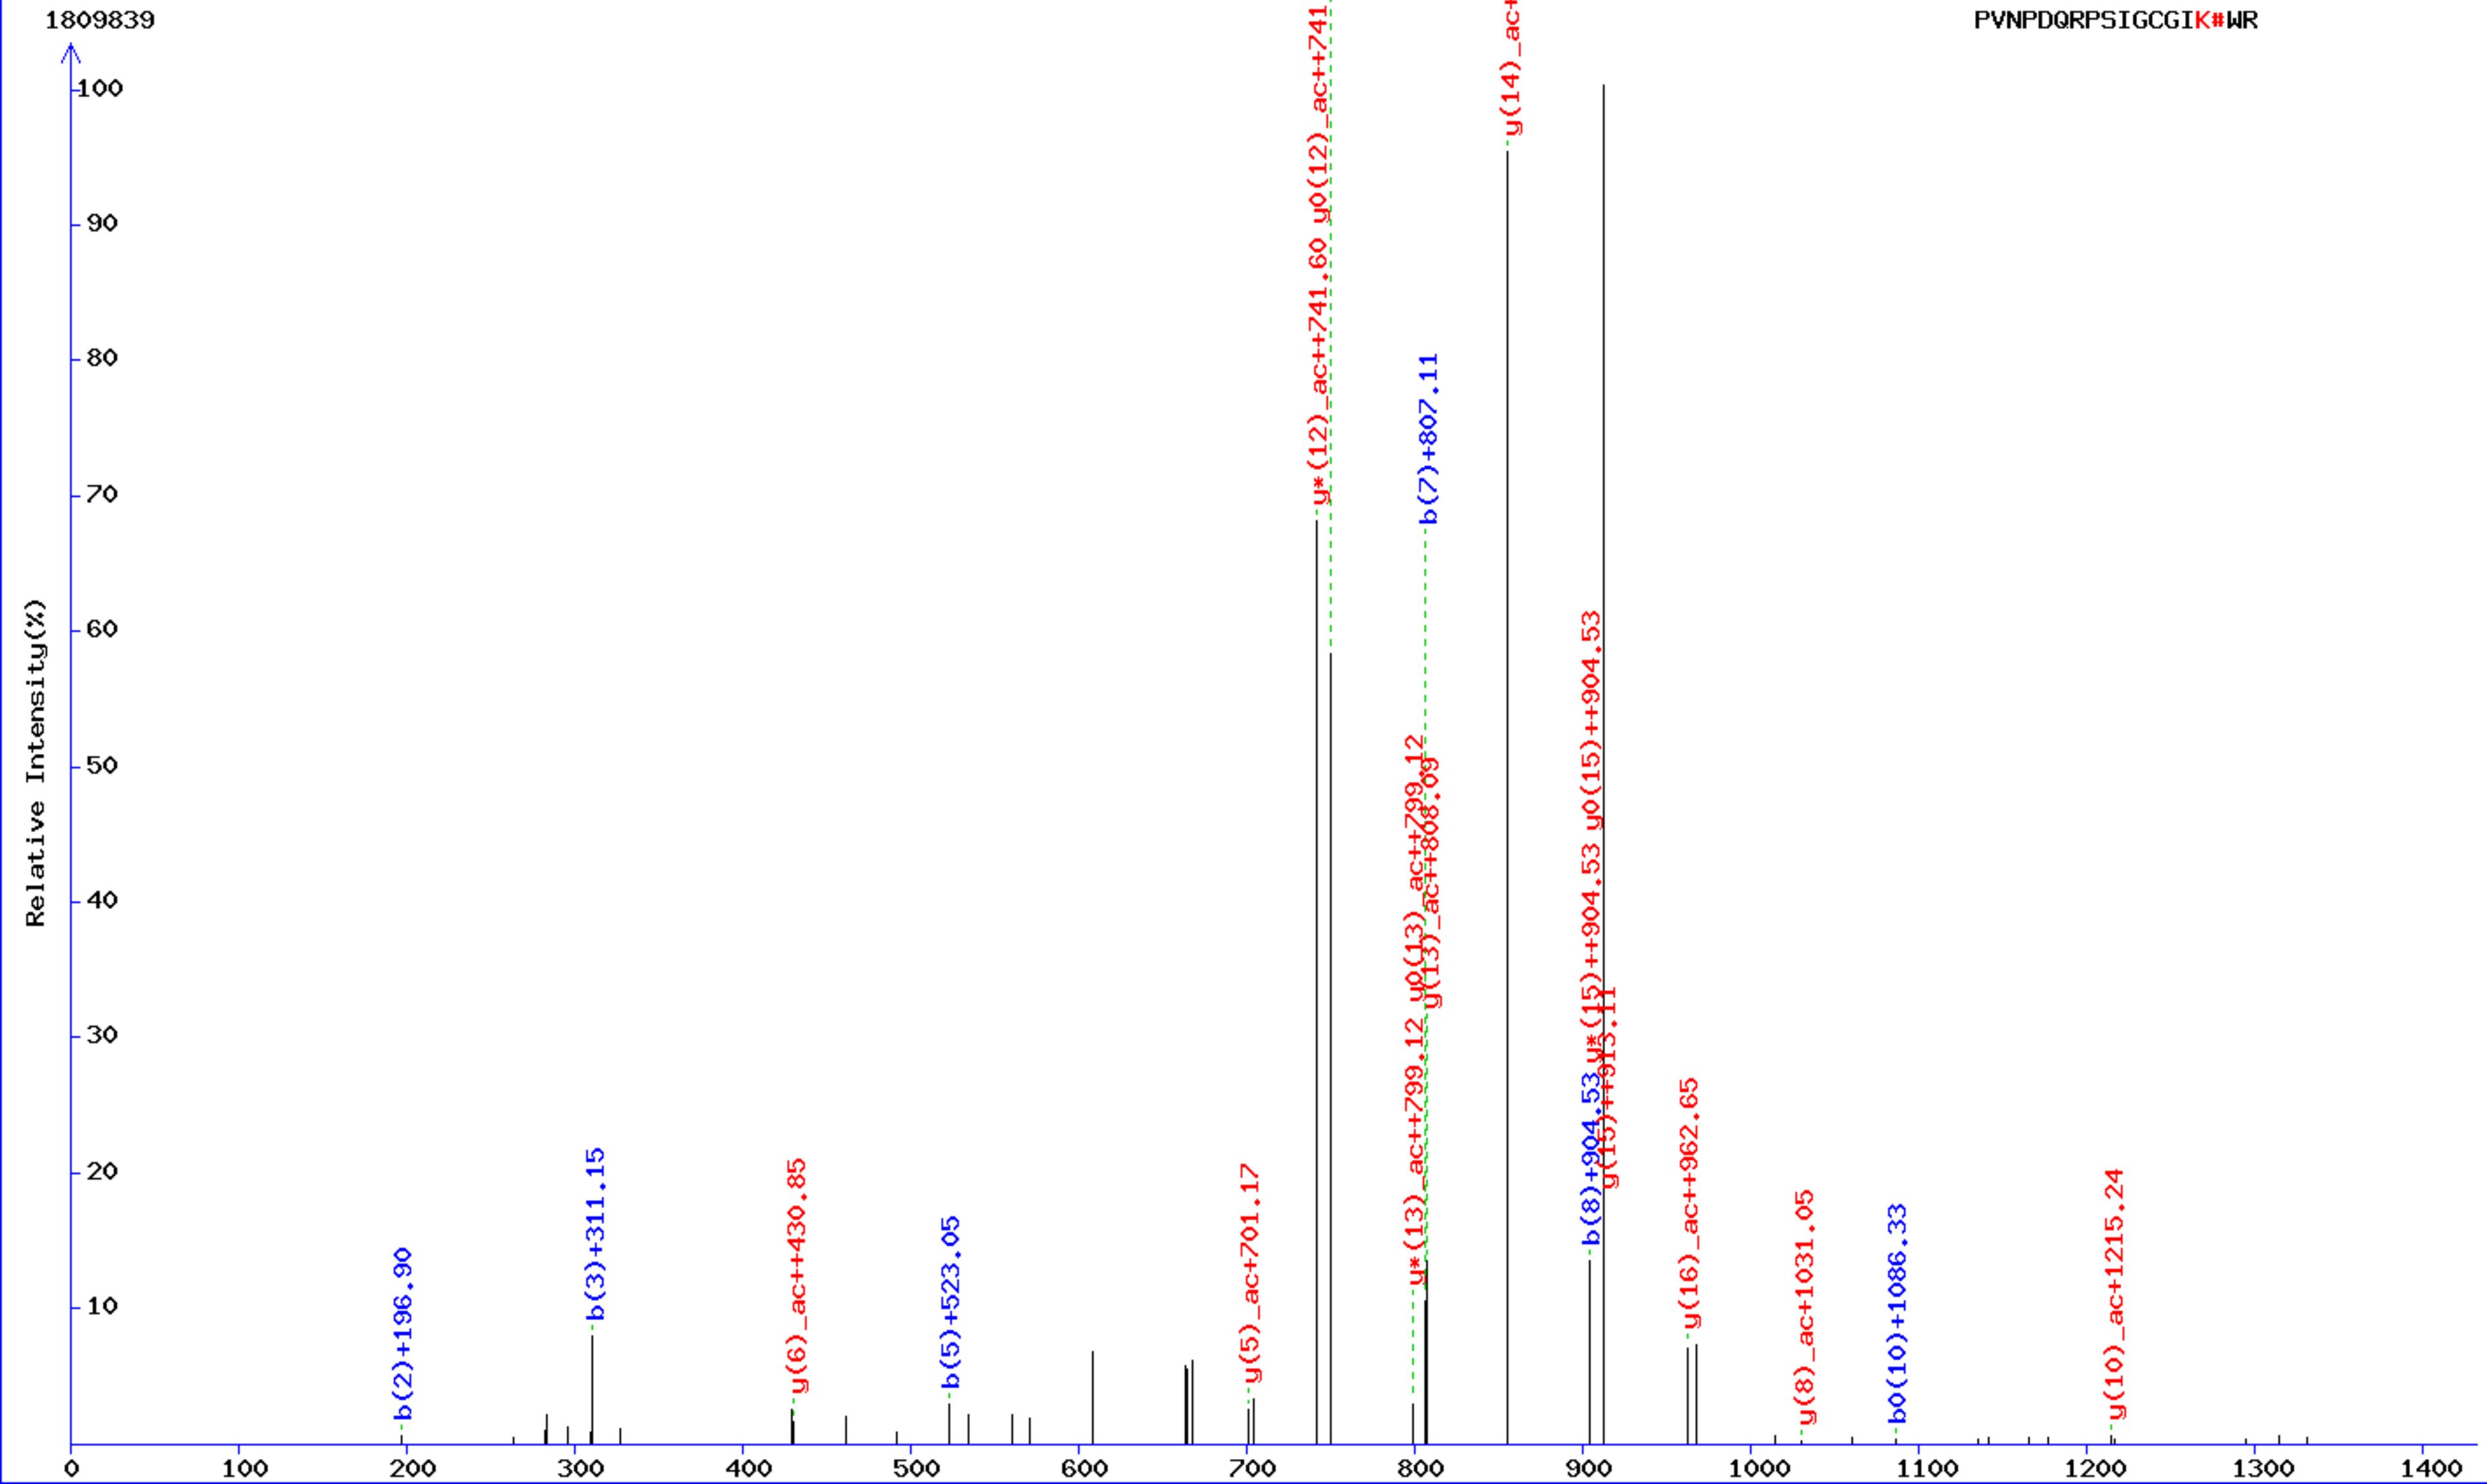



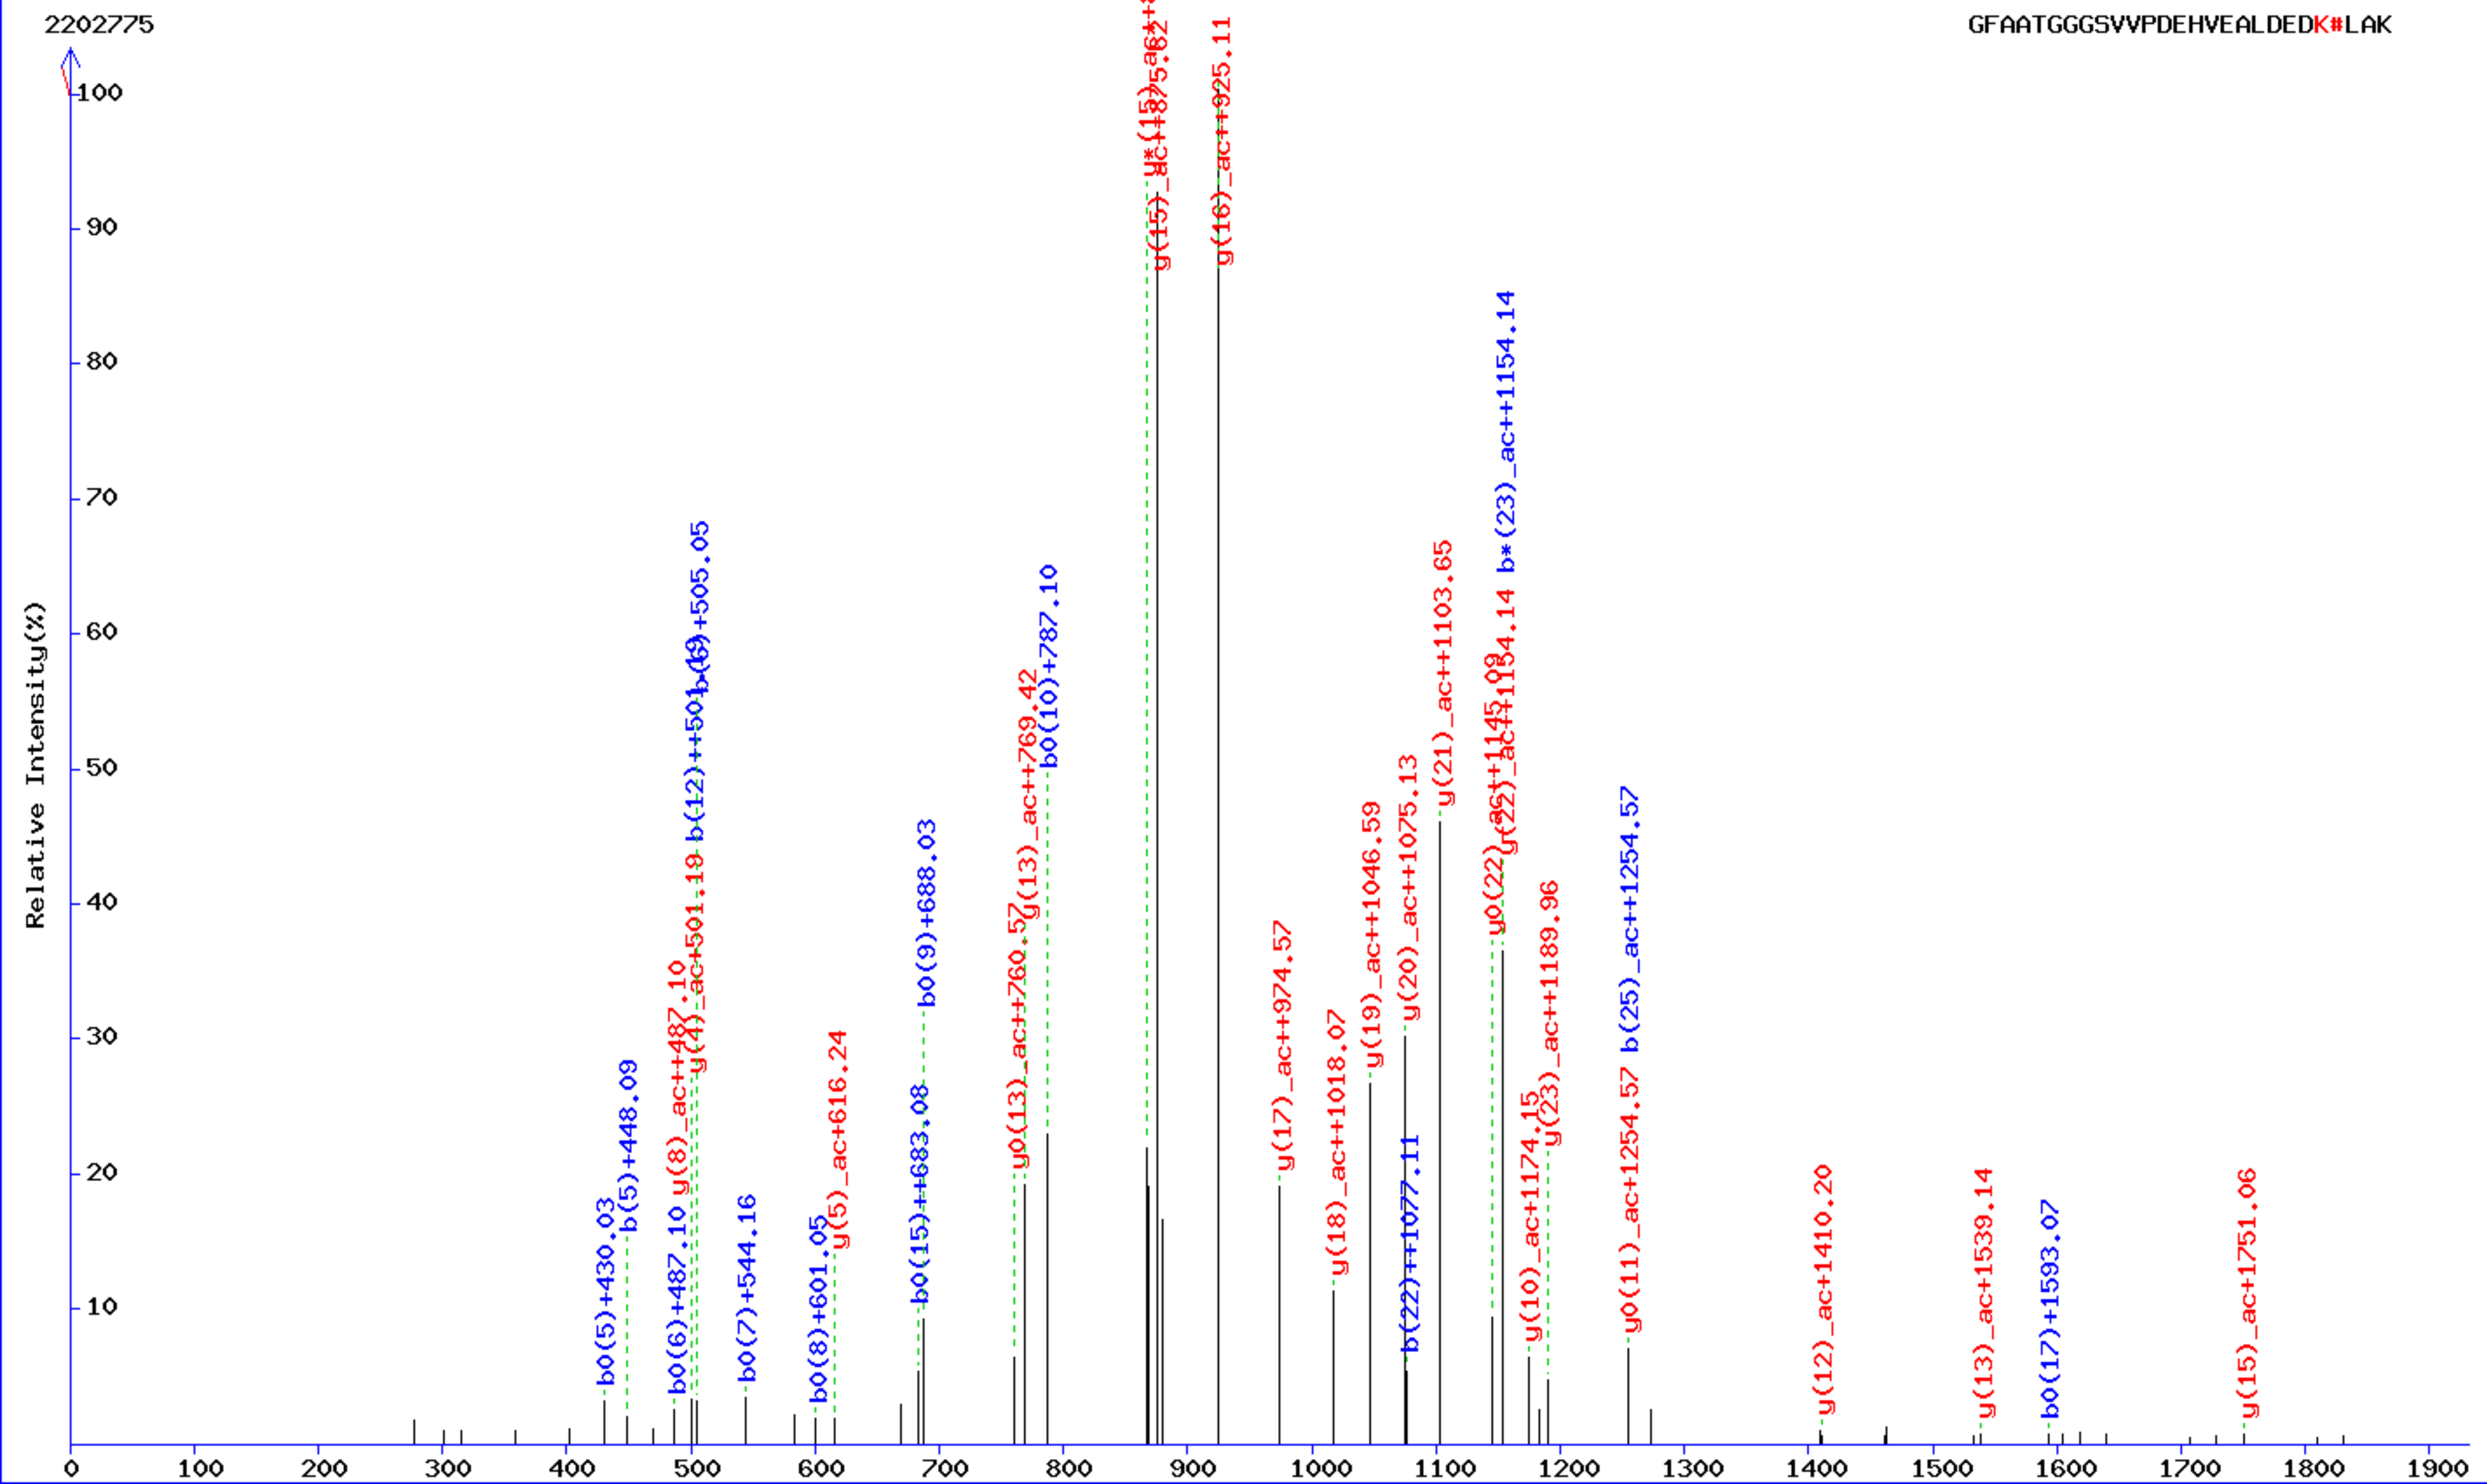

# gi|148660172 MRA\_0413 f420-dependent glucose-6-phosphate dehydrogenase Fgd1

GEELYTEK#LMPAVR

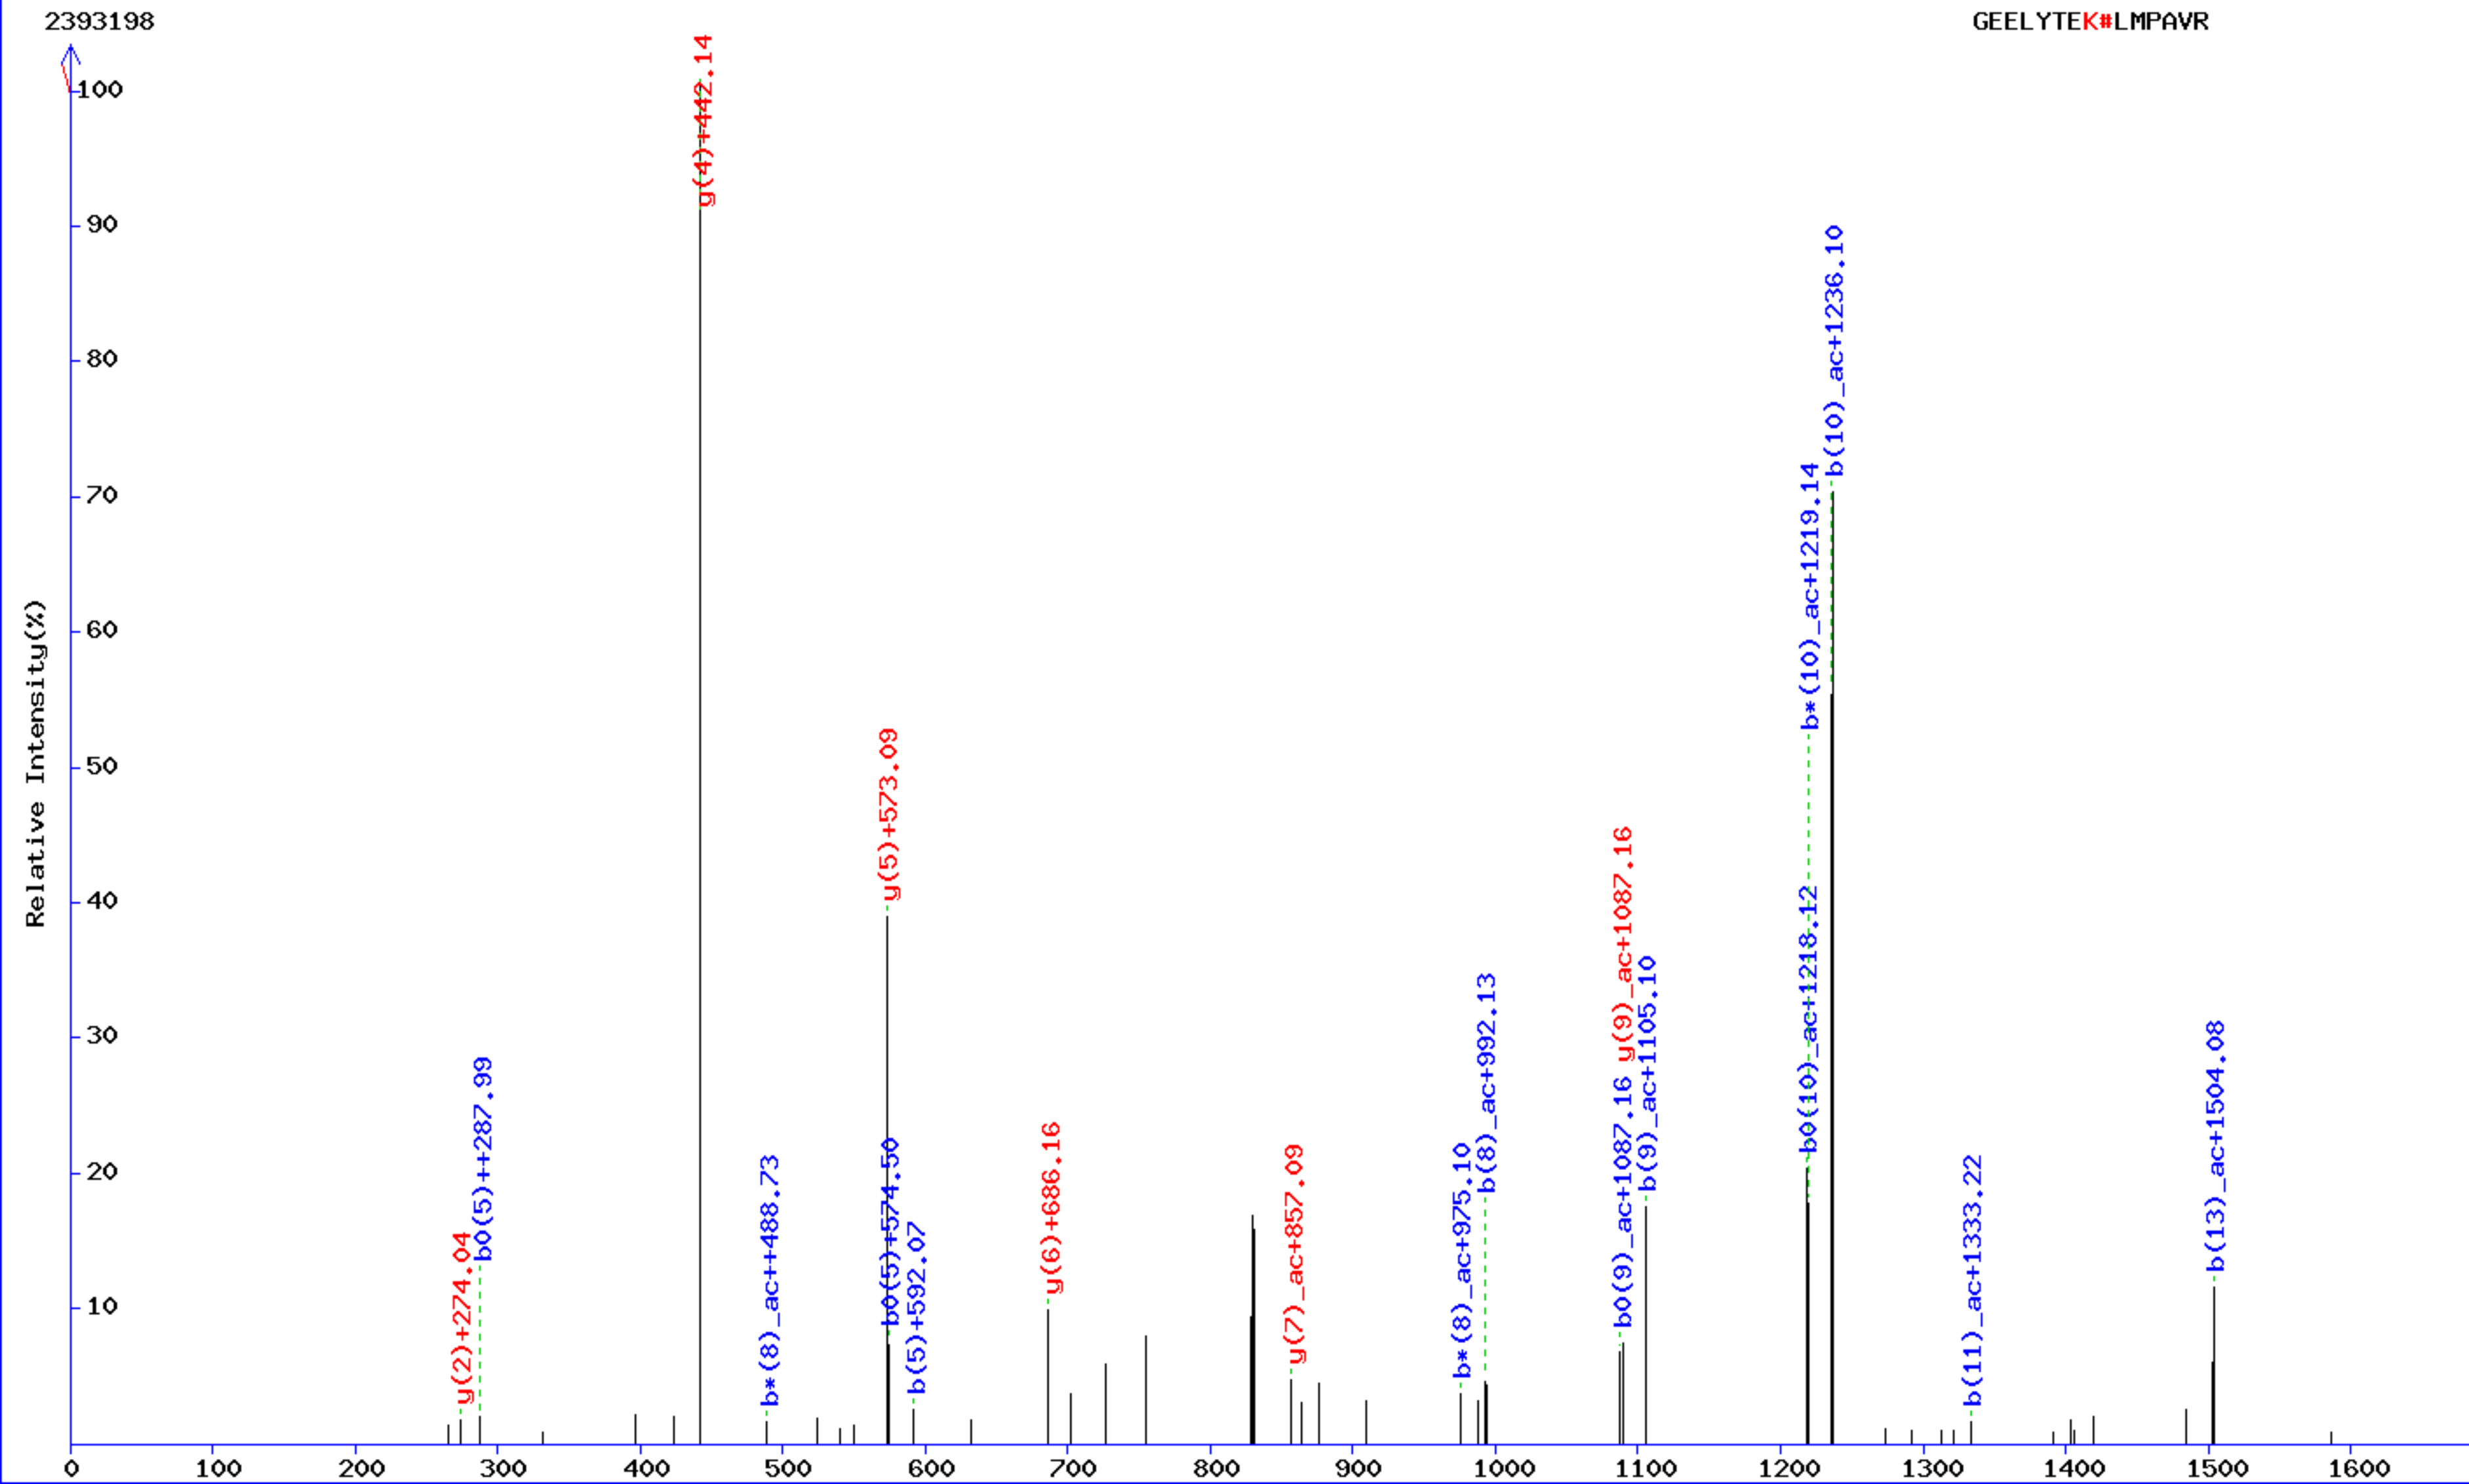

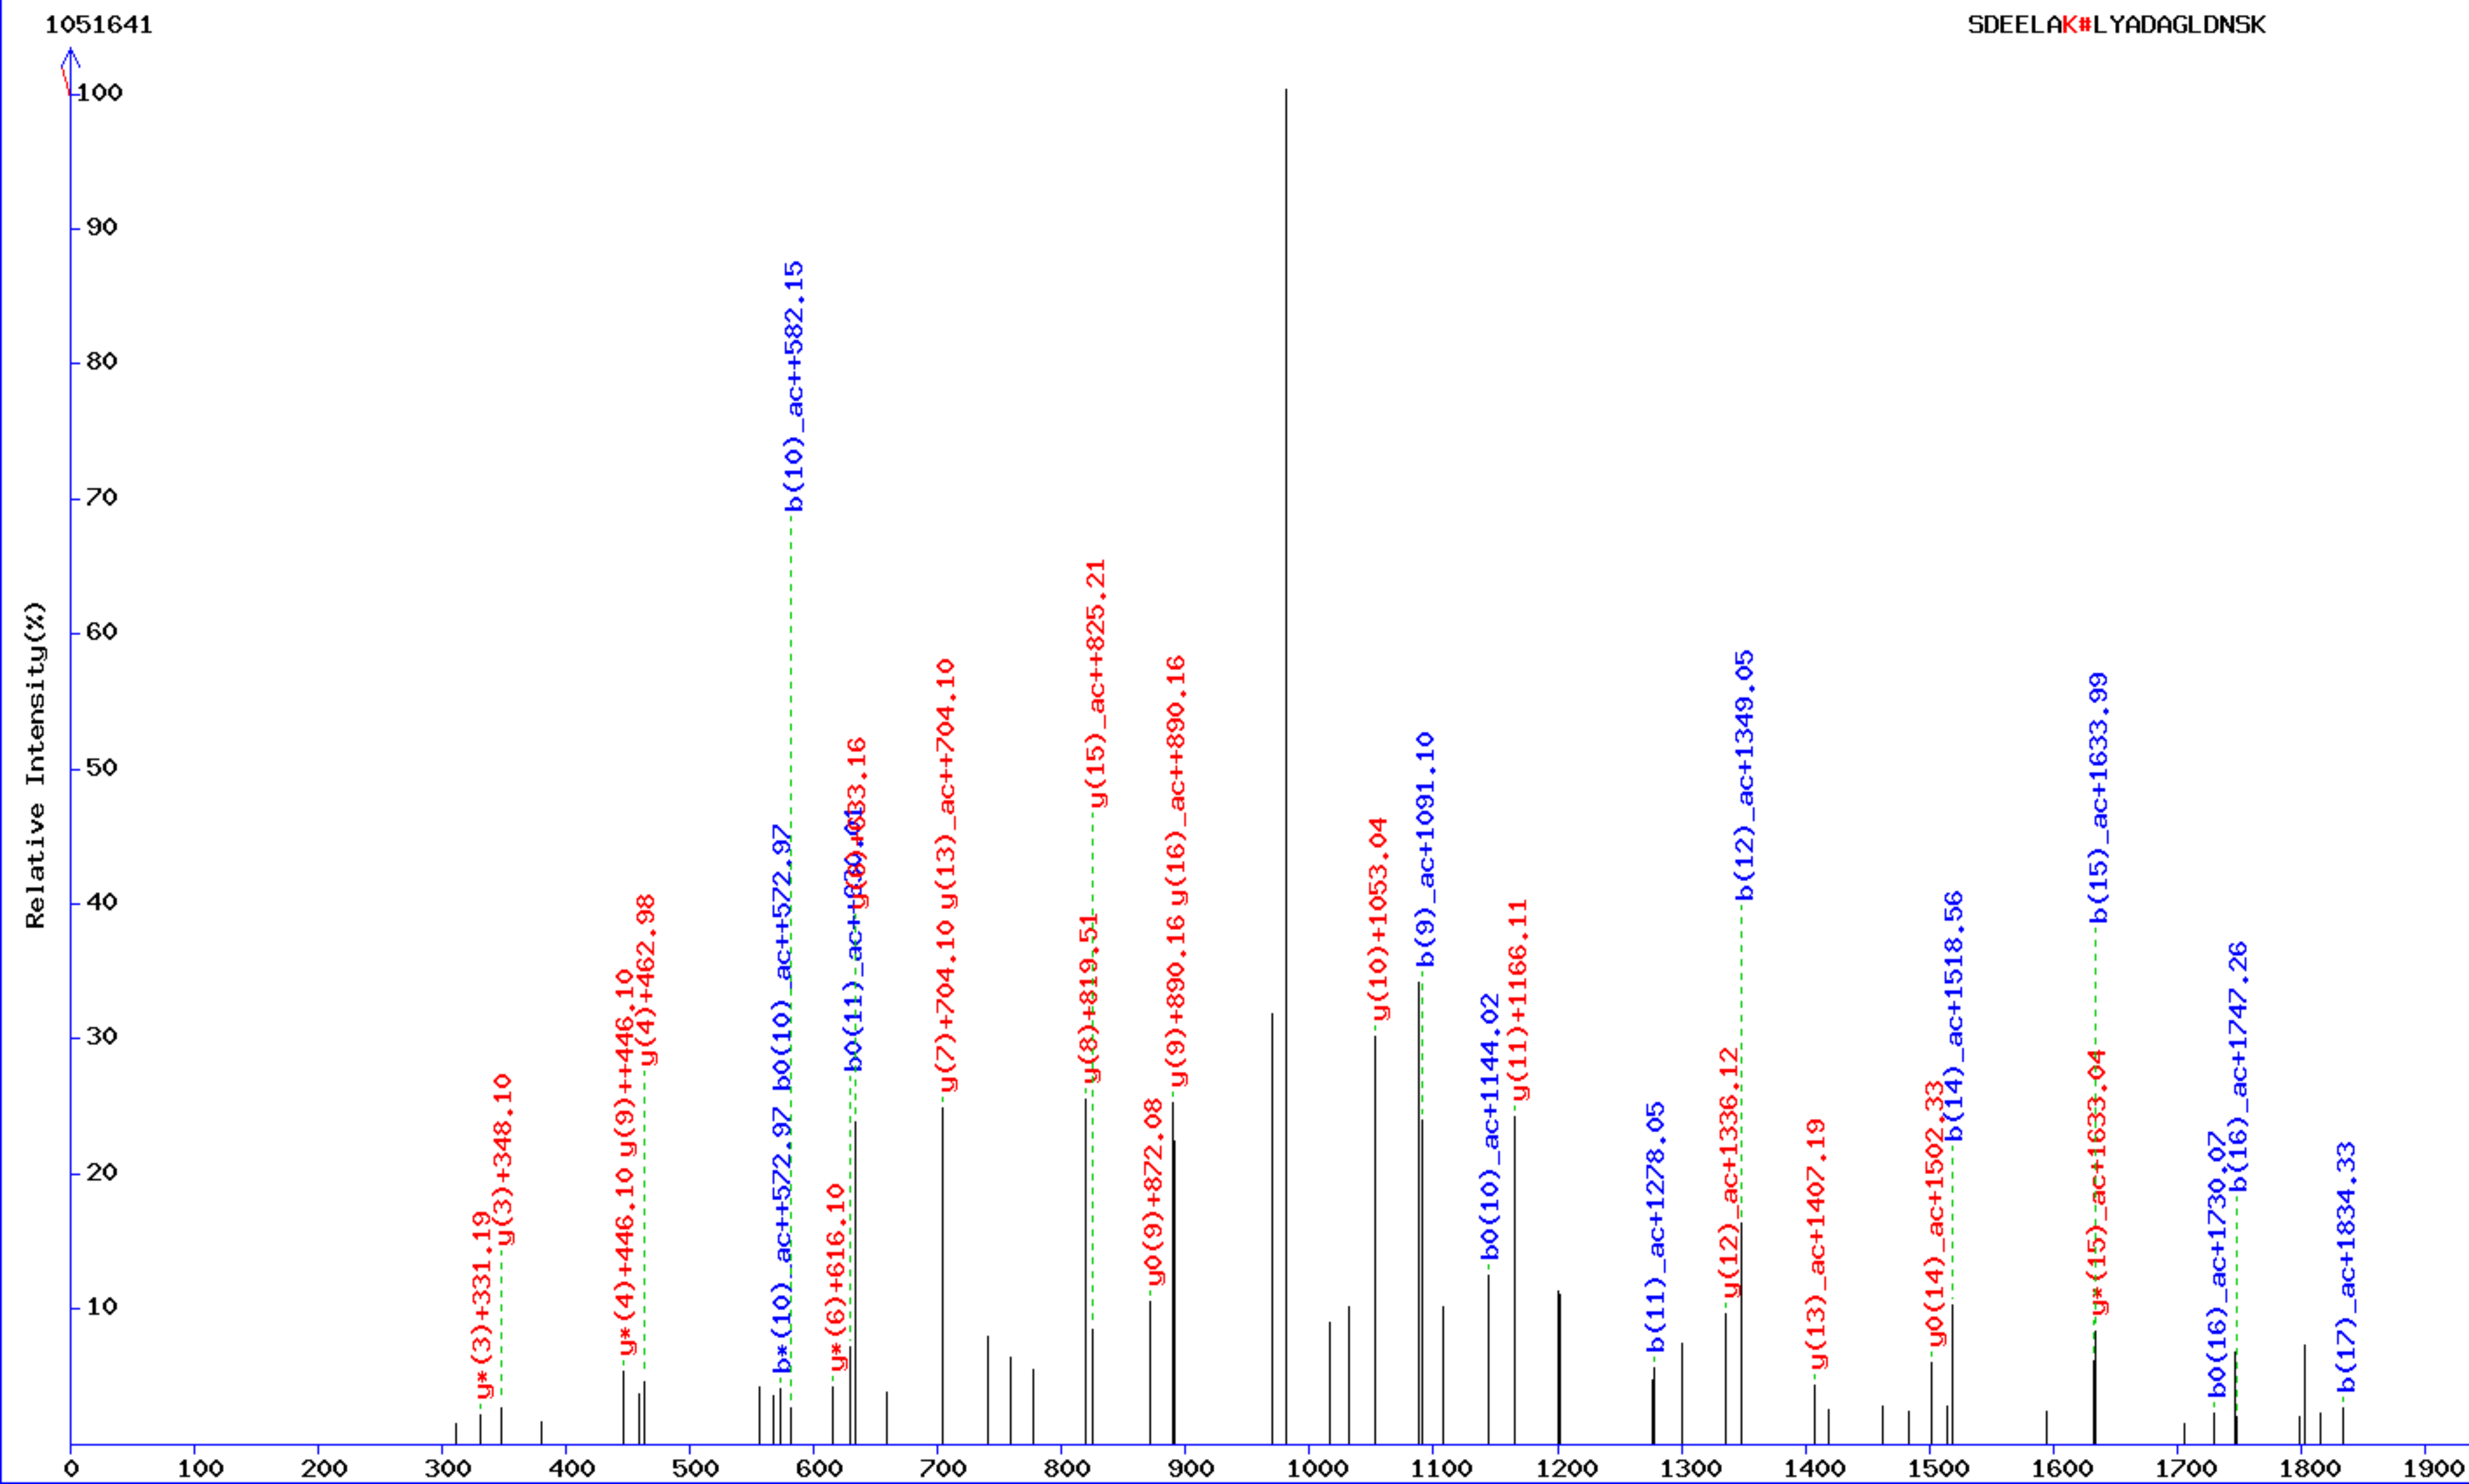

# gi|148662013 MRA\_2212 ubiquinol-cytochrome C reductase QcrB

SVLEHGVETGIIK#R

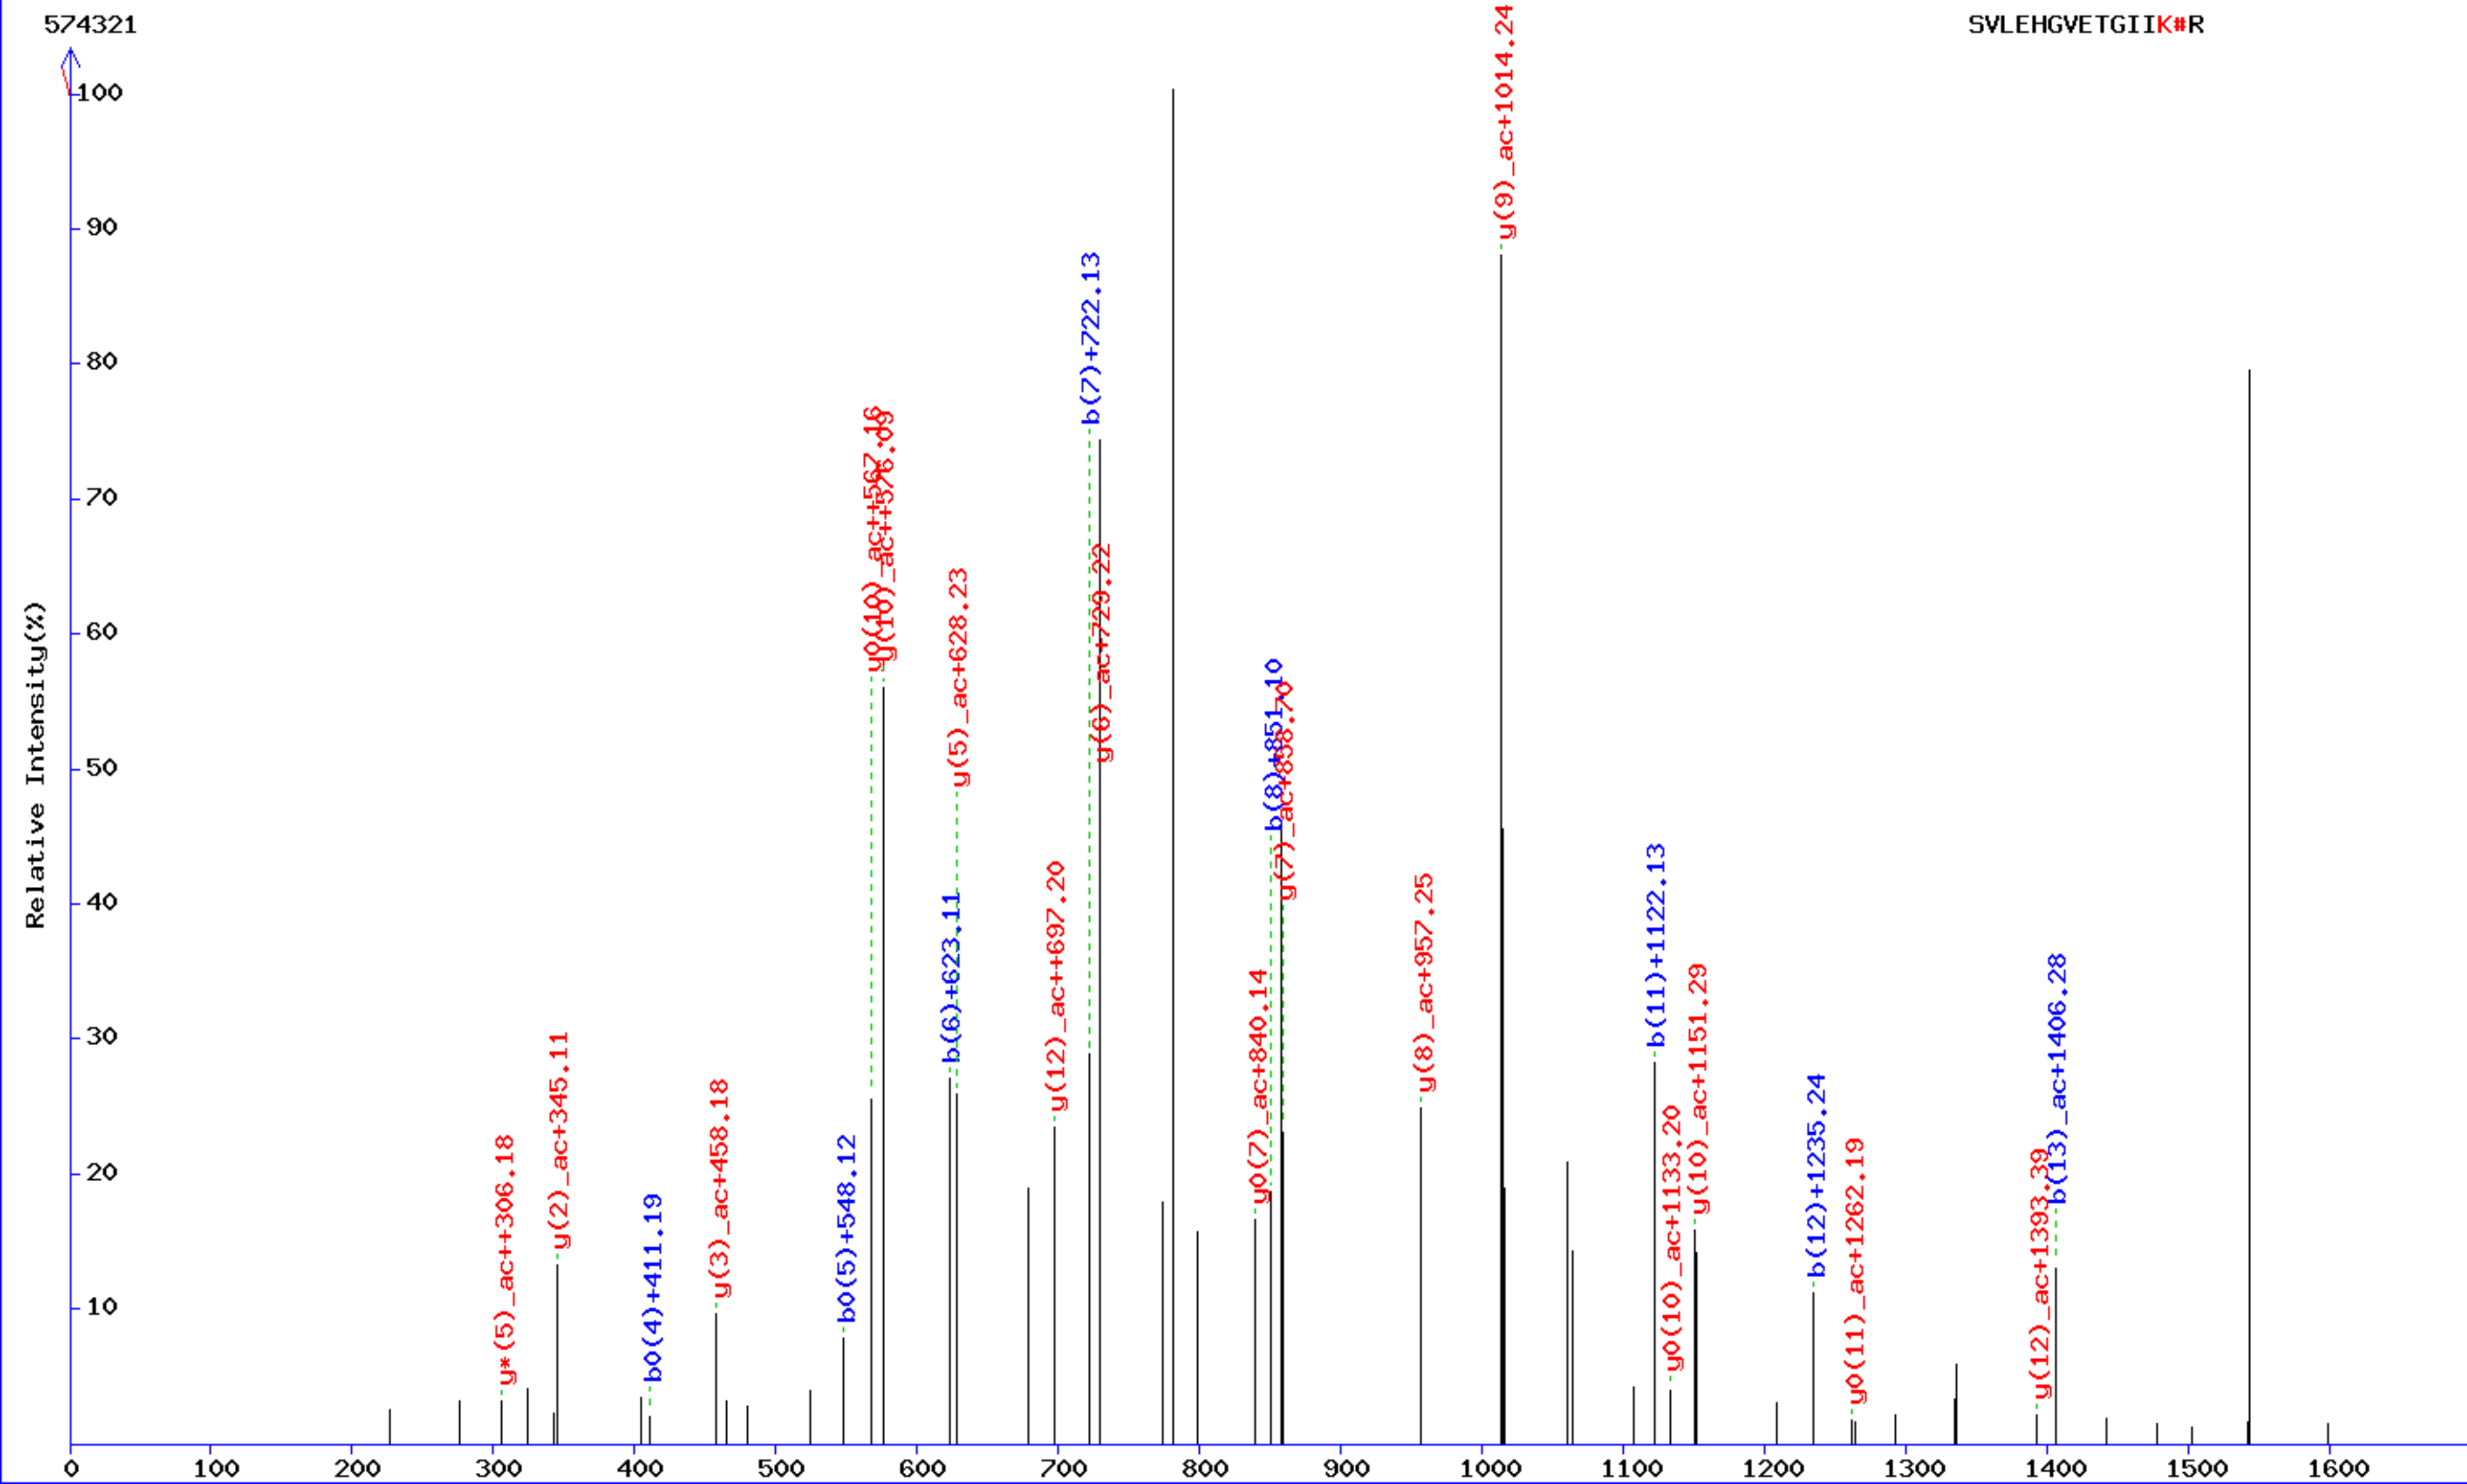

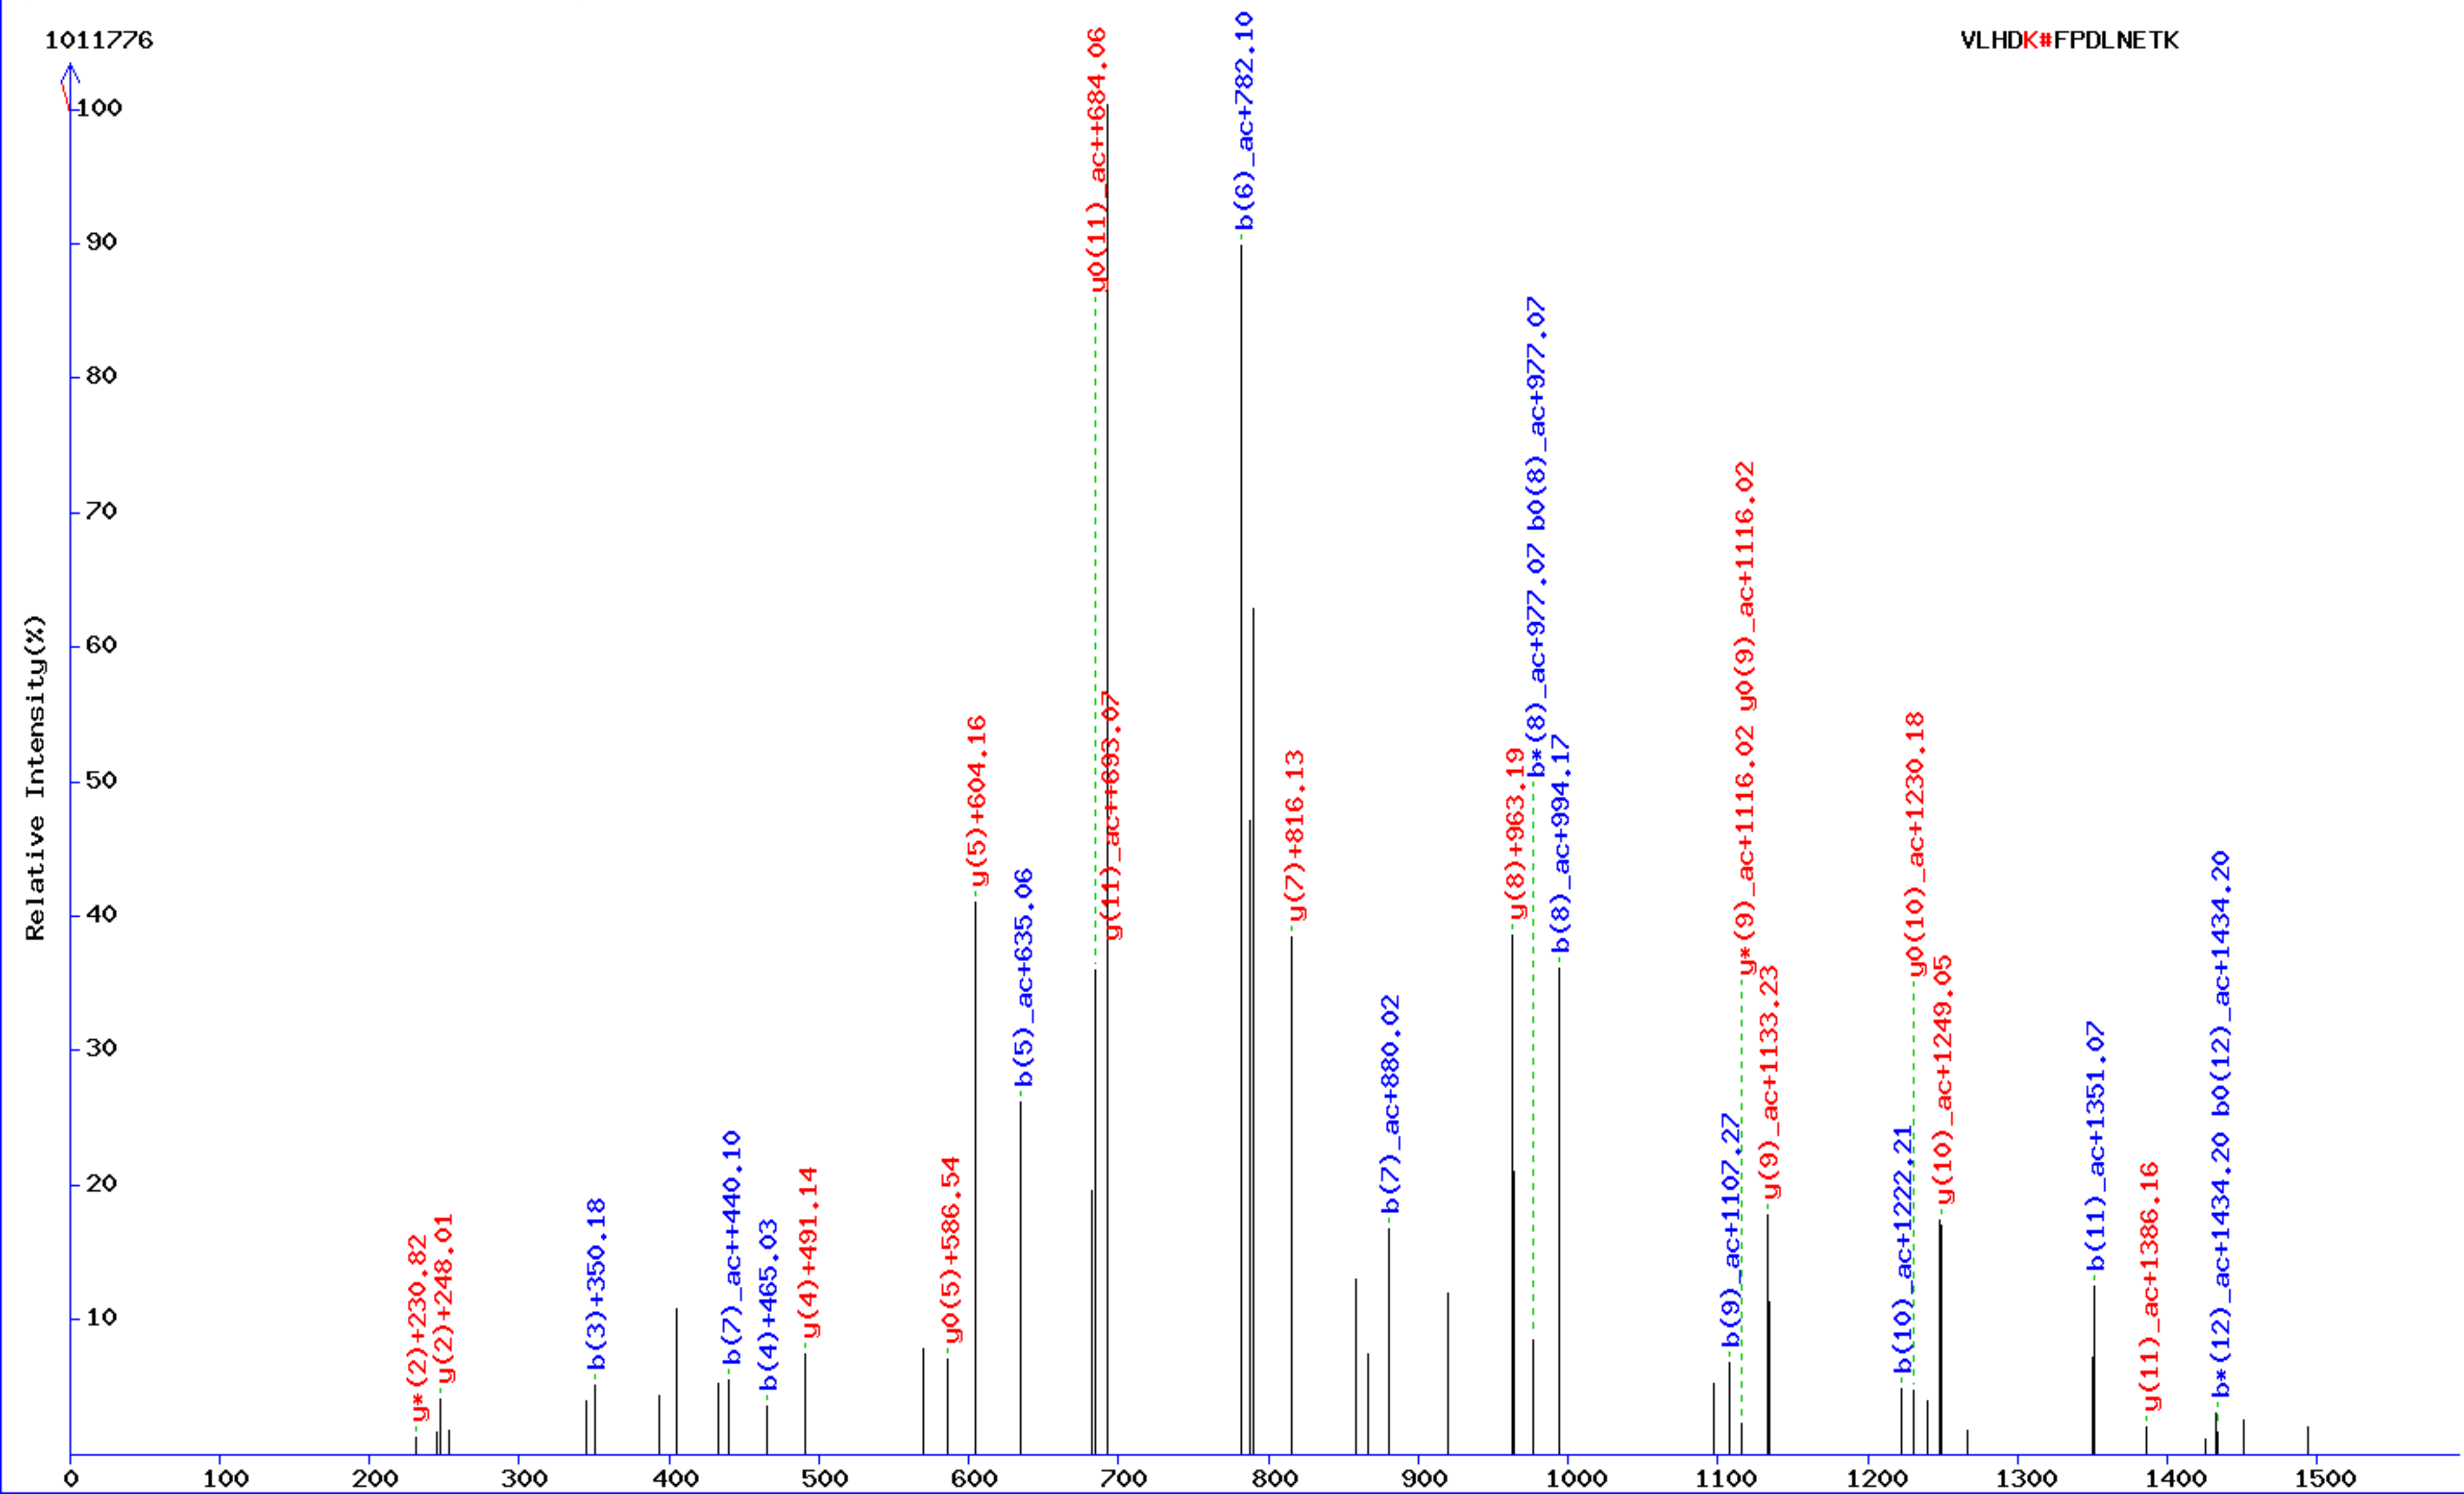

# gi|148661096 MRA\_1316 ATP synthase F0F1 subunit alpha

LTEVIK#NFK

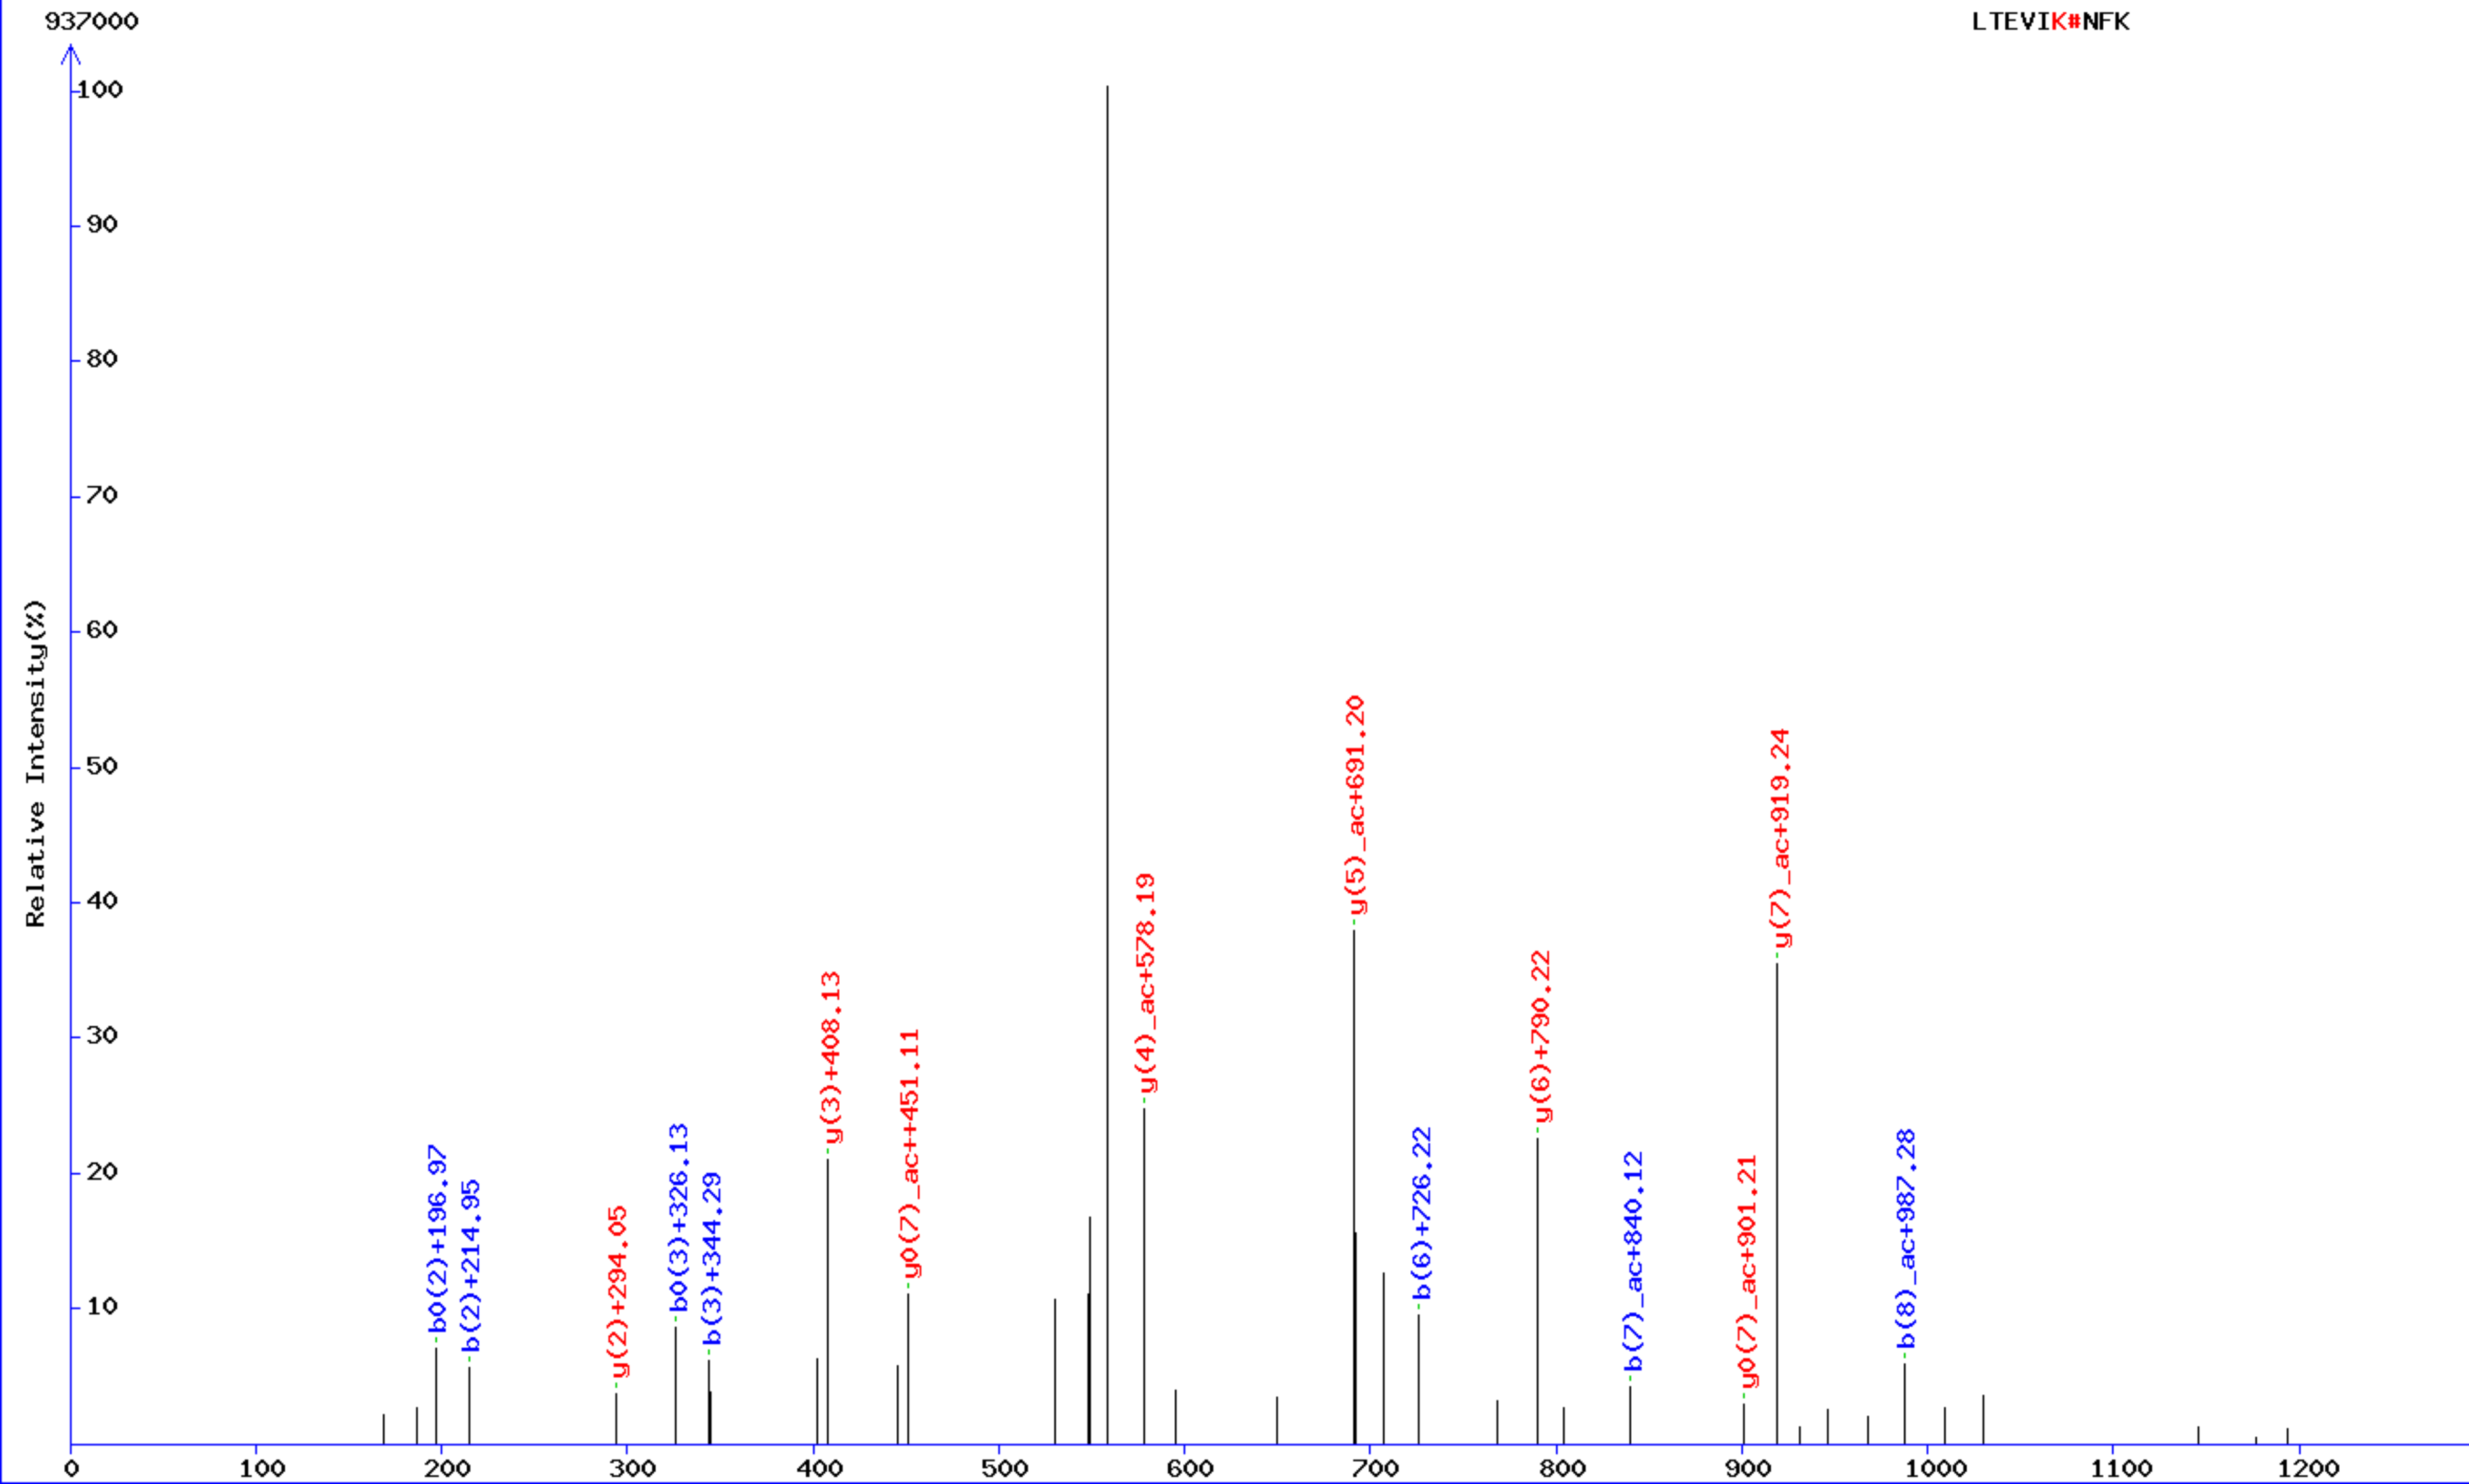

# gi|148662311 MRA\_2501 NAD-dependent glutamate dehydrogenase Gdh

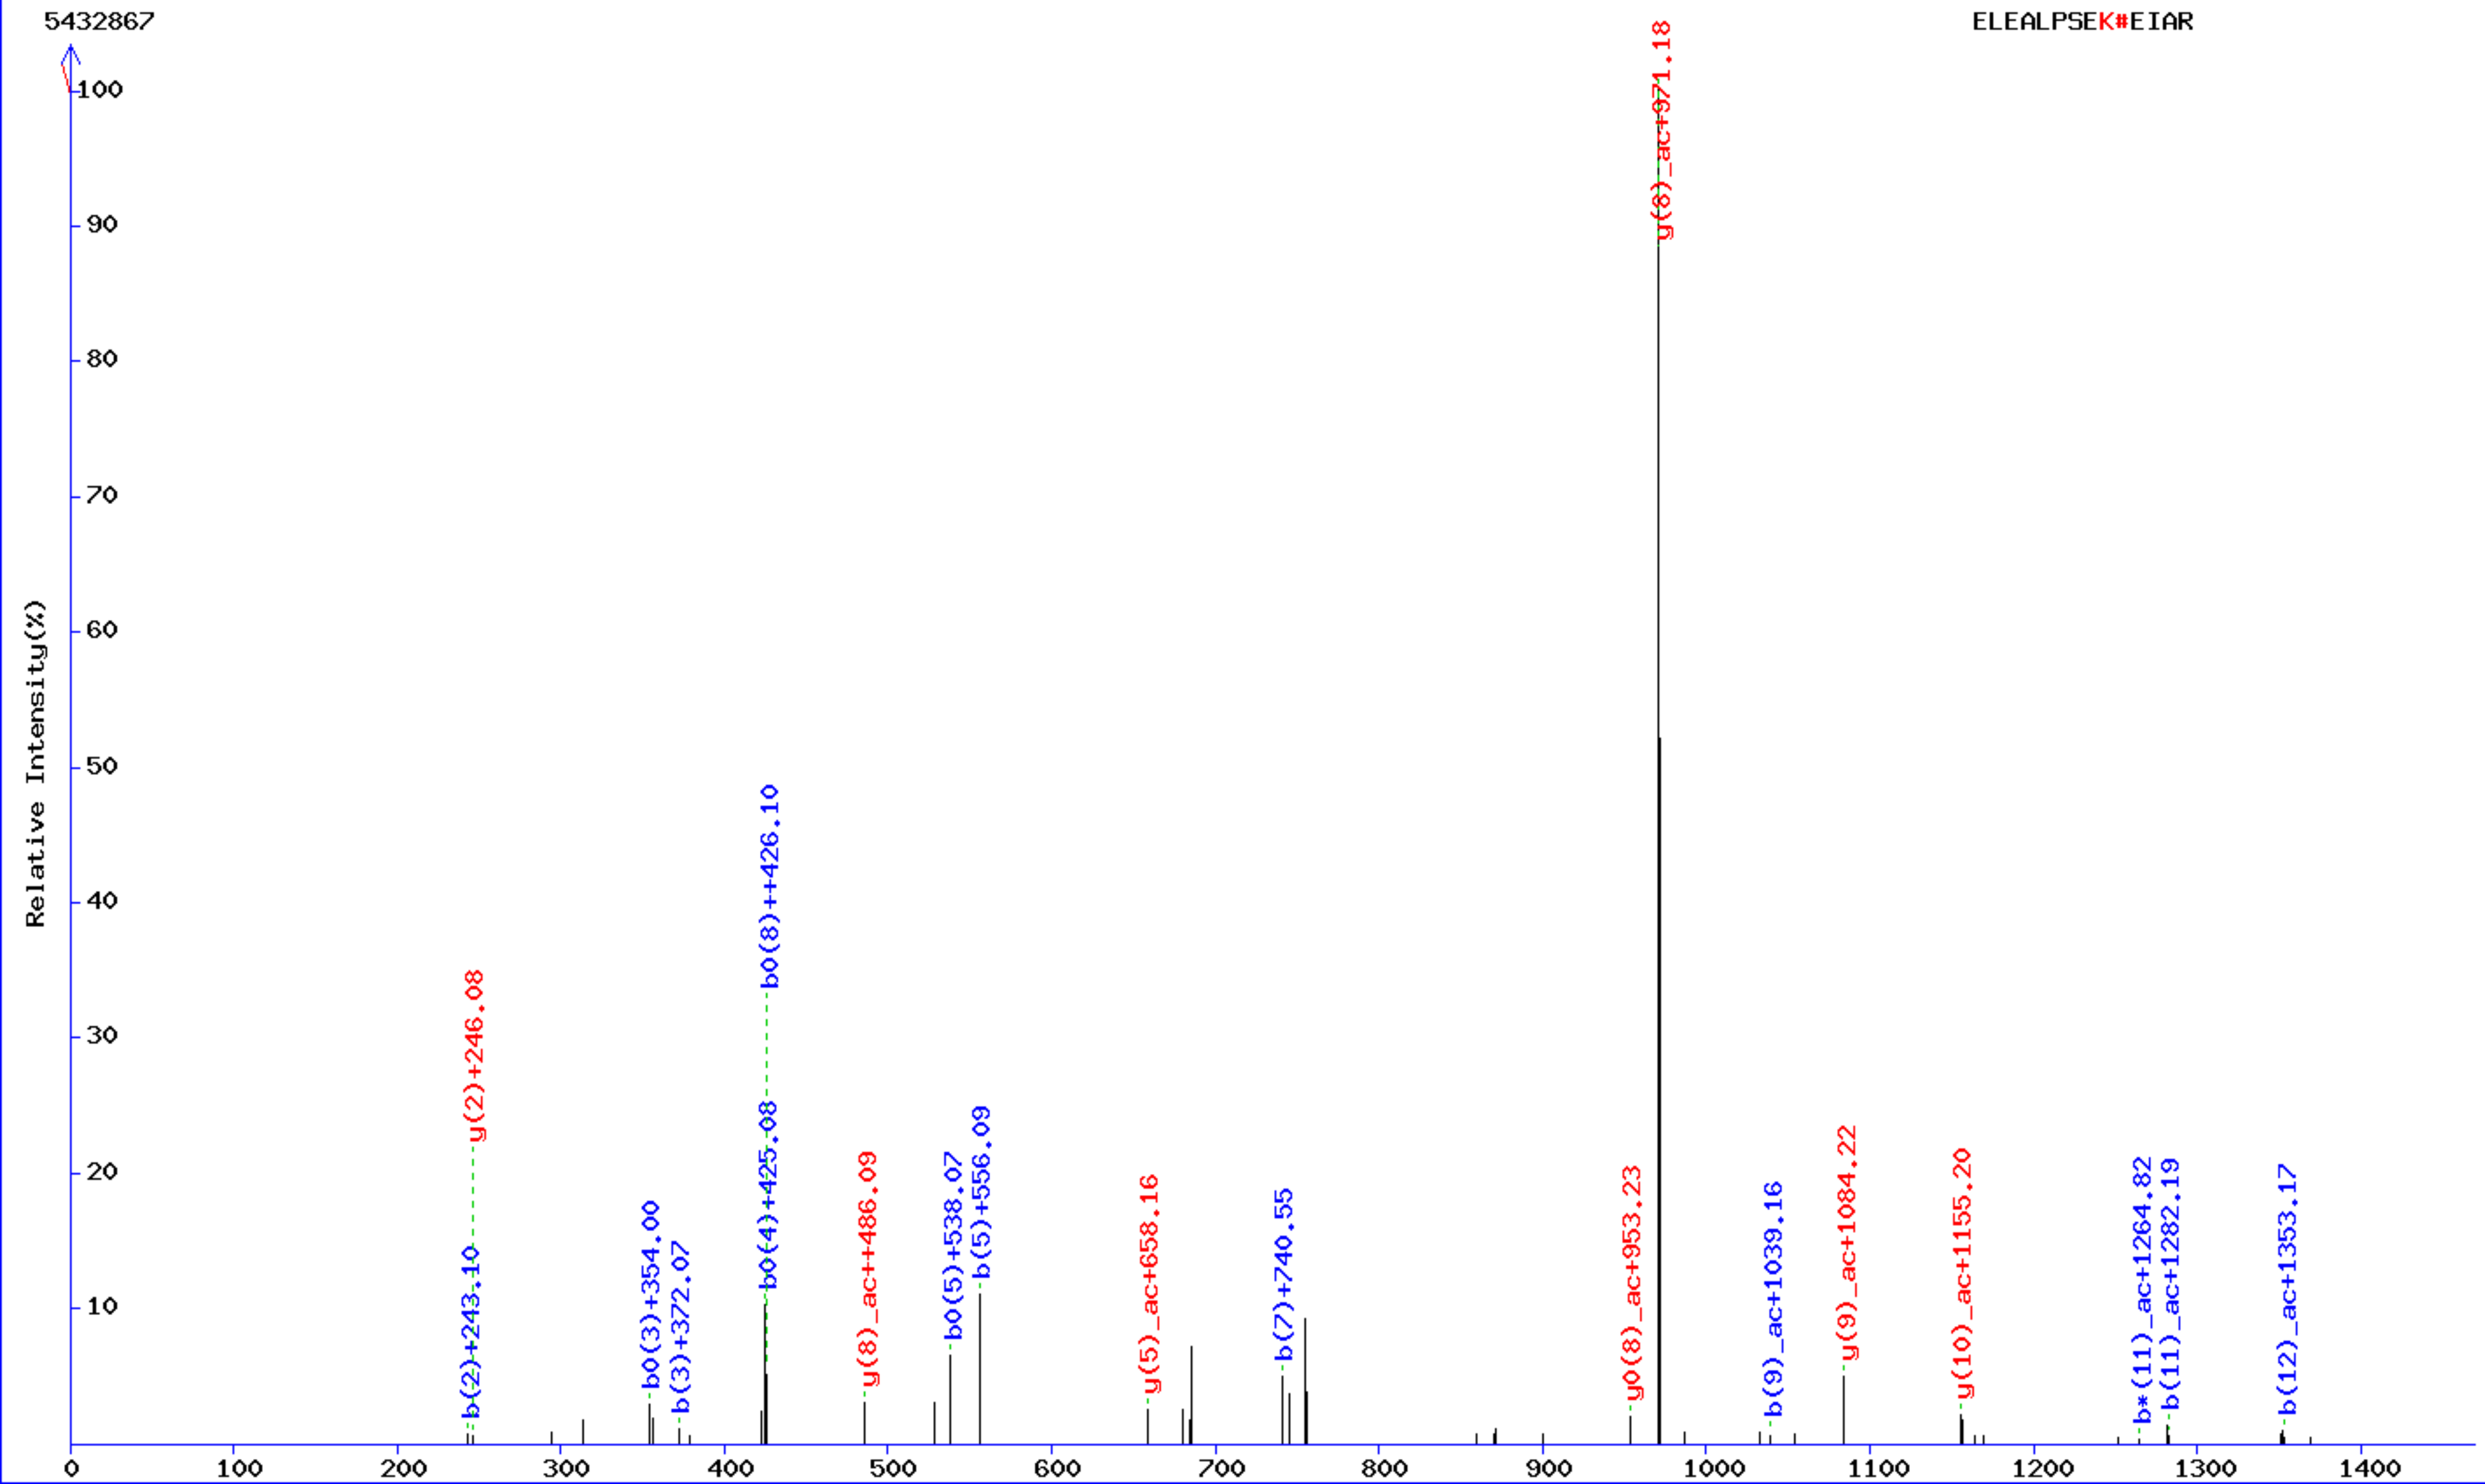

# gi|148661961 MRA\_2160 hypothetical protein

PLTPADVHNVAFSKPPIGK#R

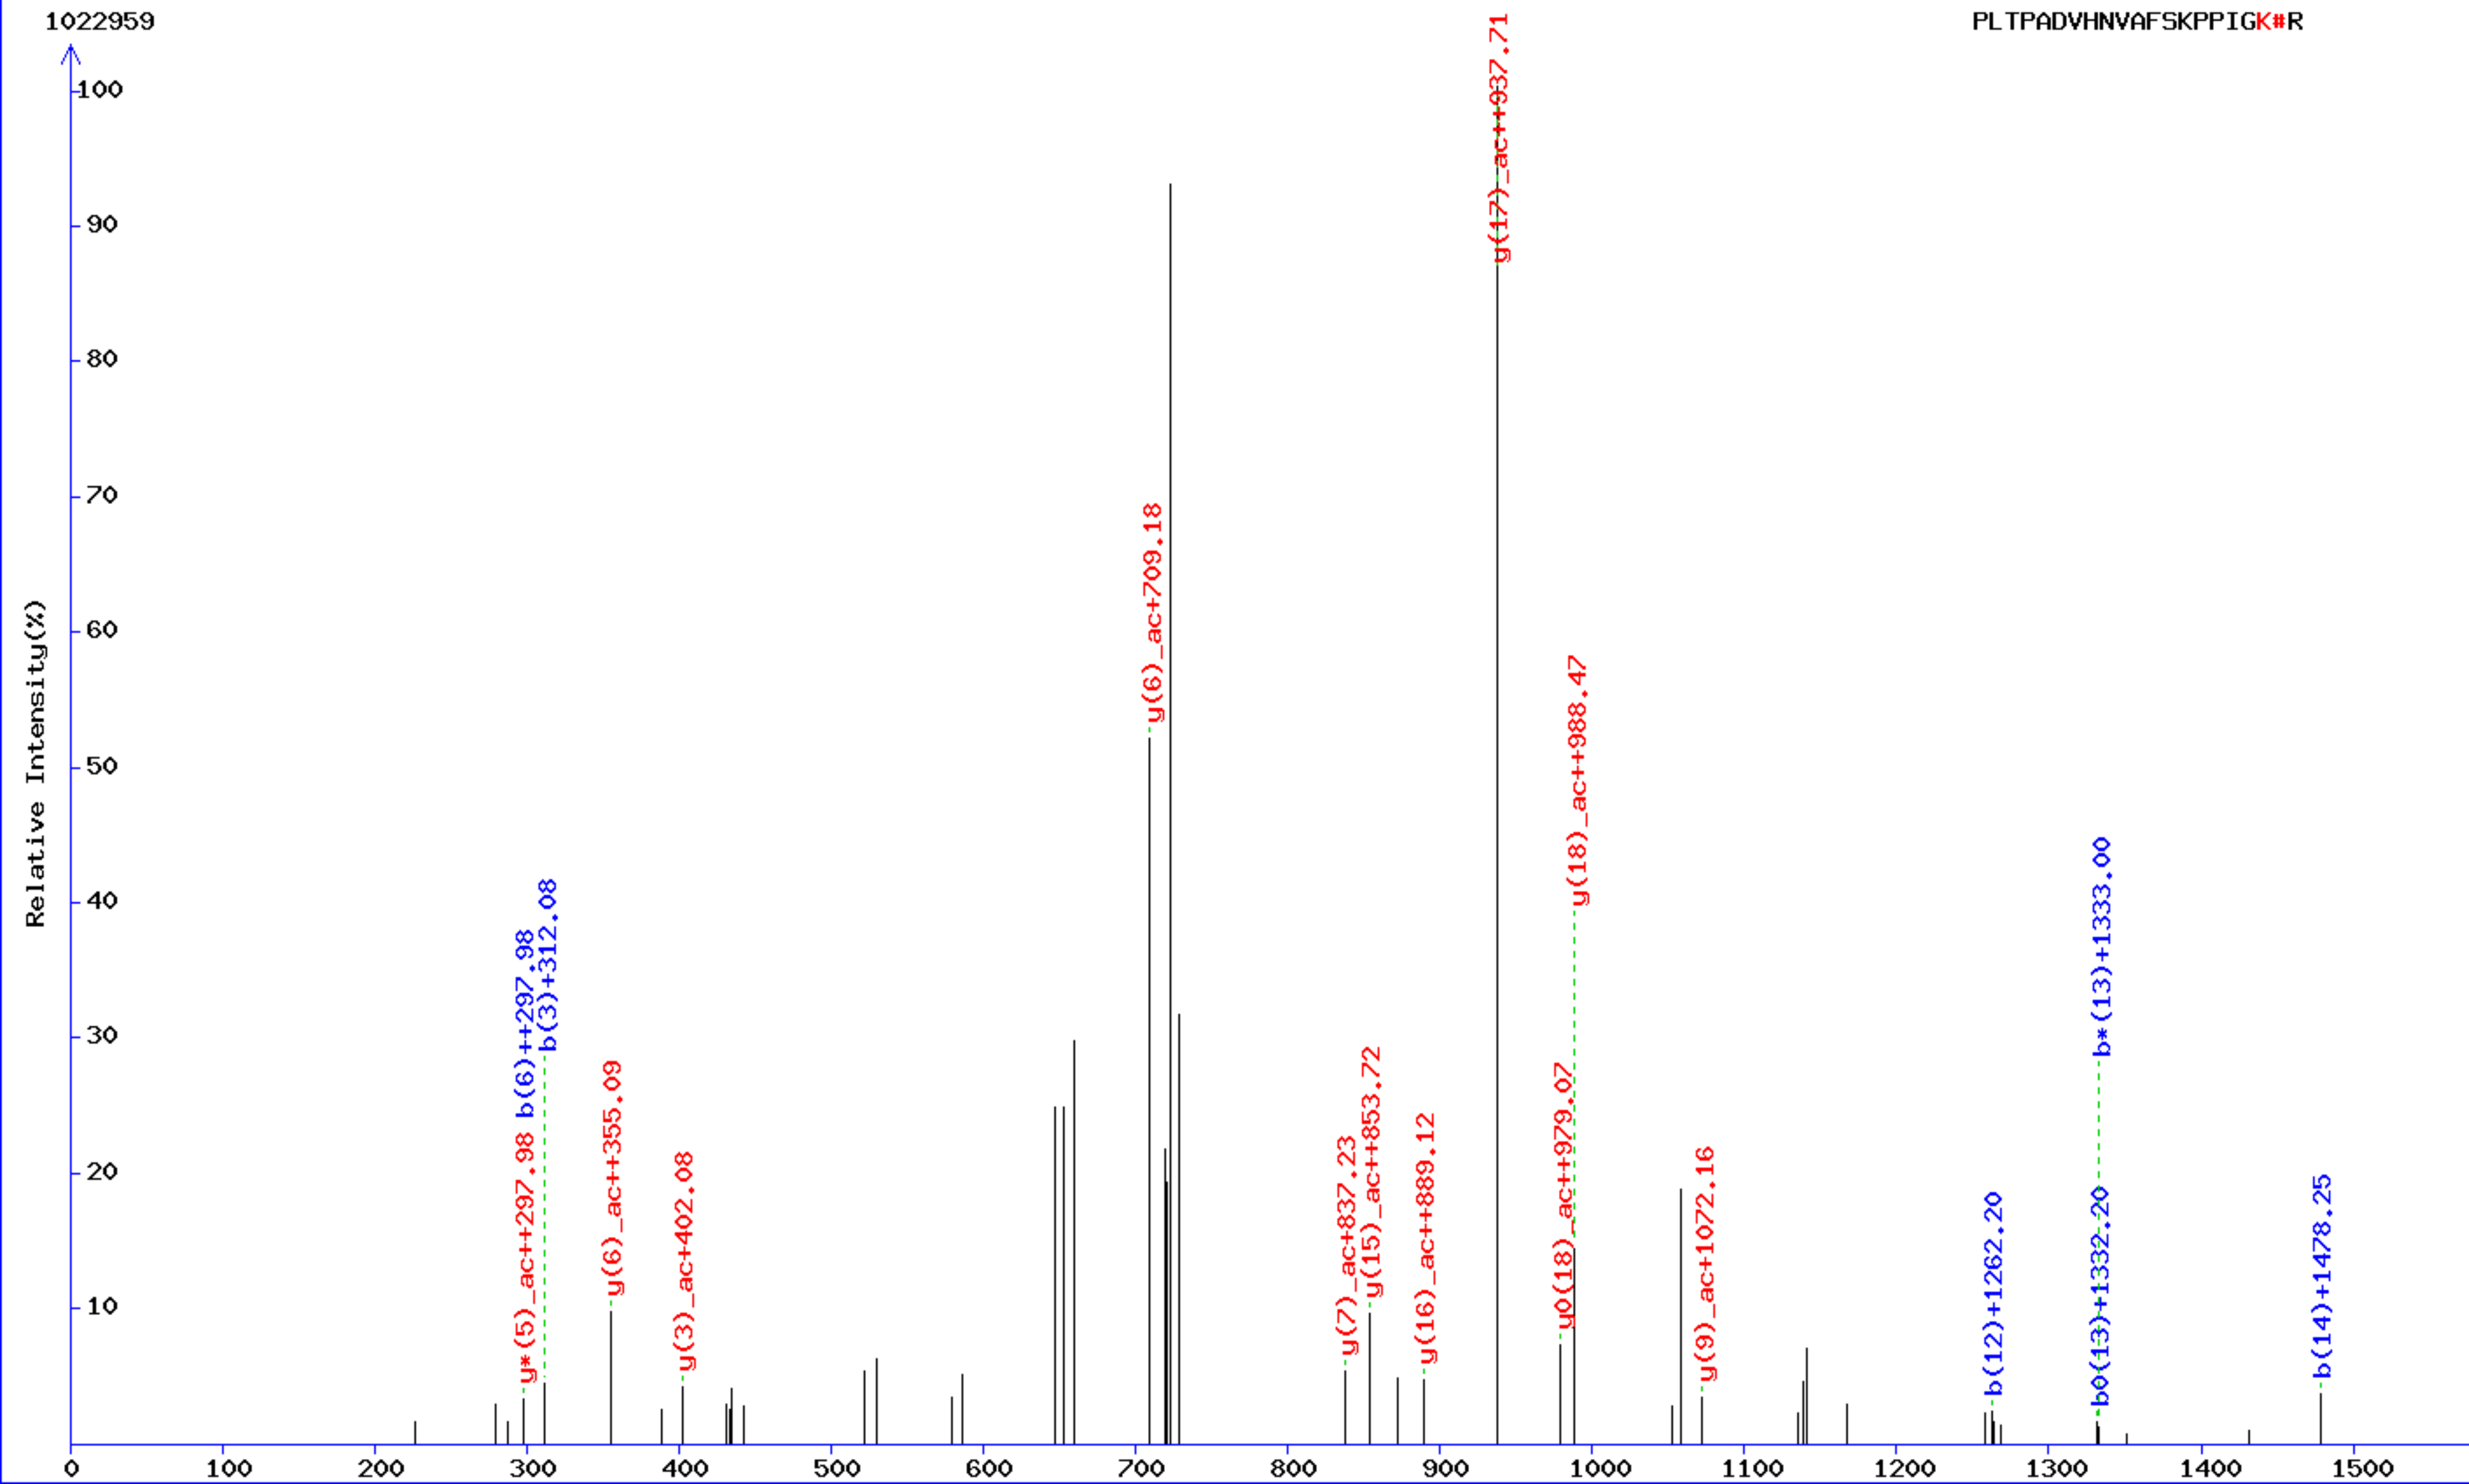



# gi|148663086 MRA\_3264 short chain dehydrogenase

DGANIALIAK#TAEPHPKLPGTVFTAAK#

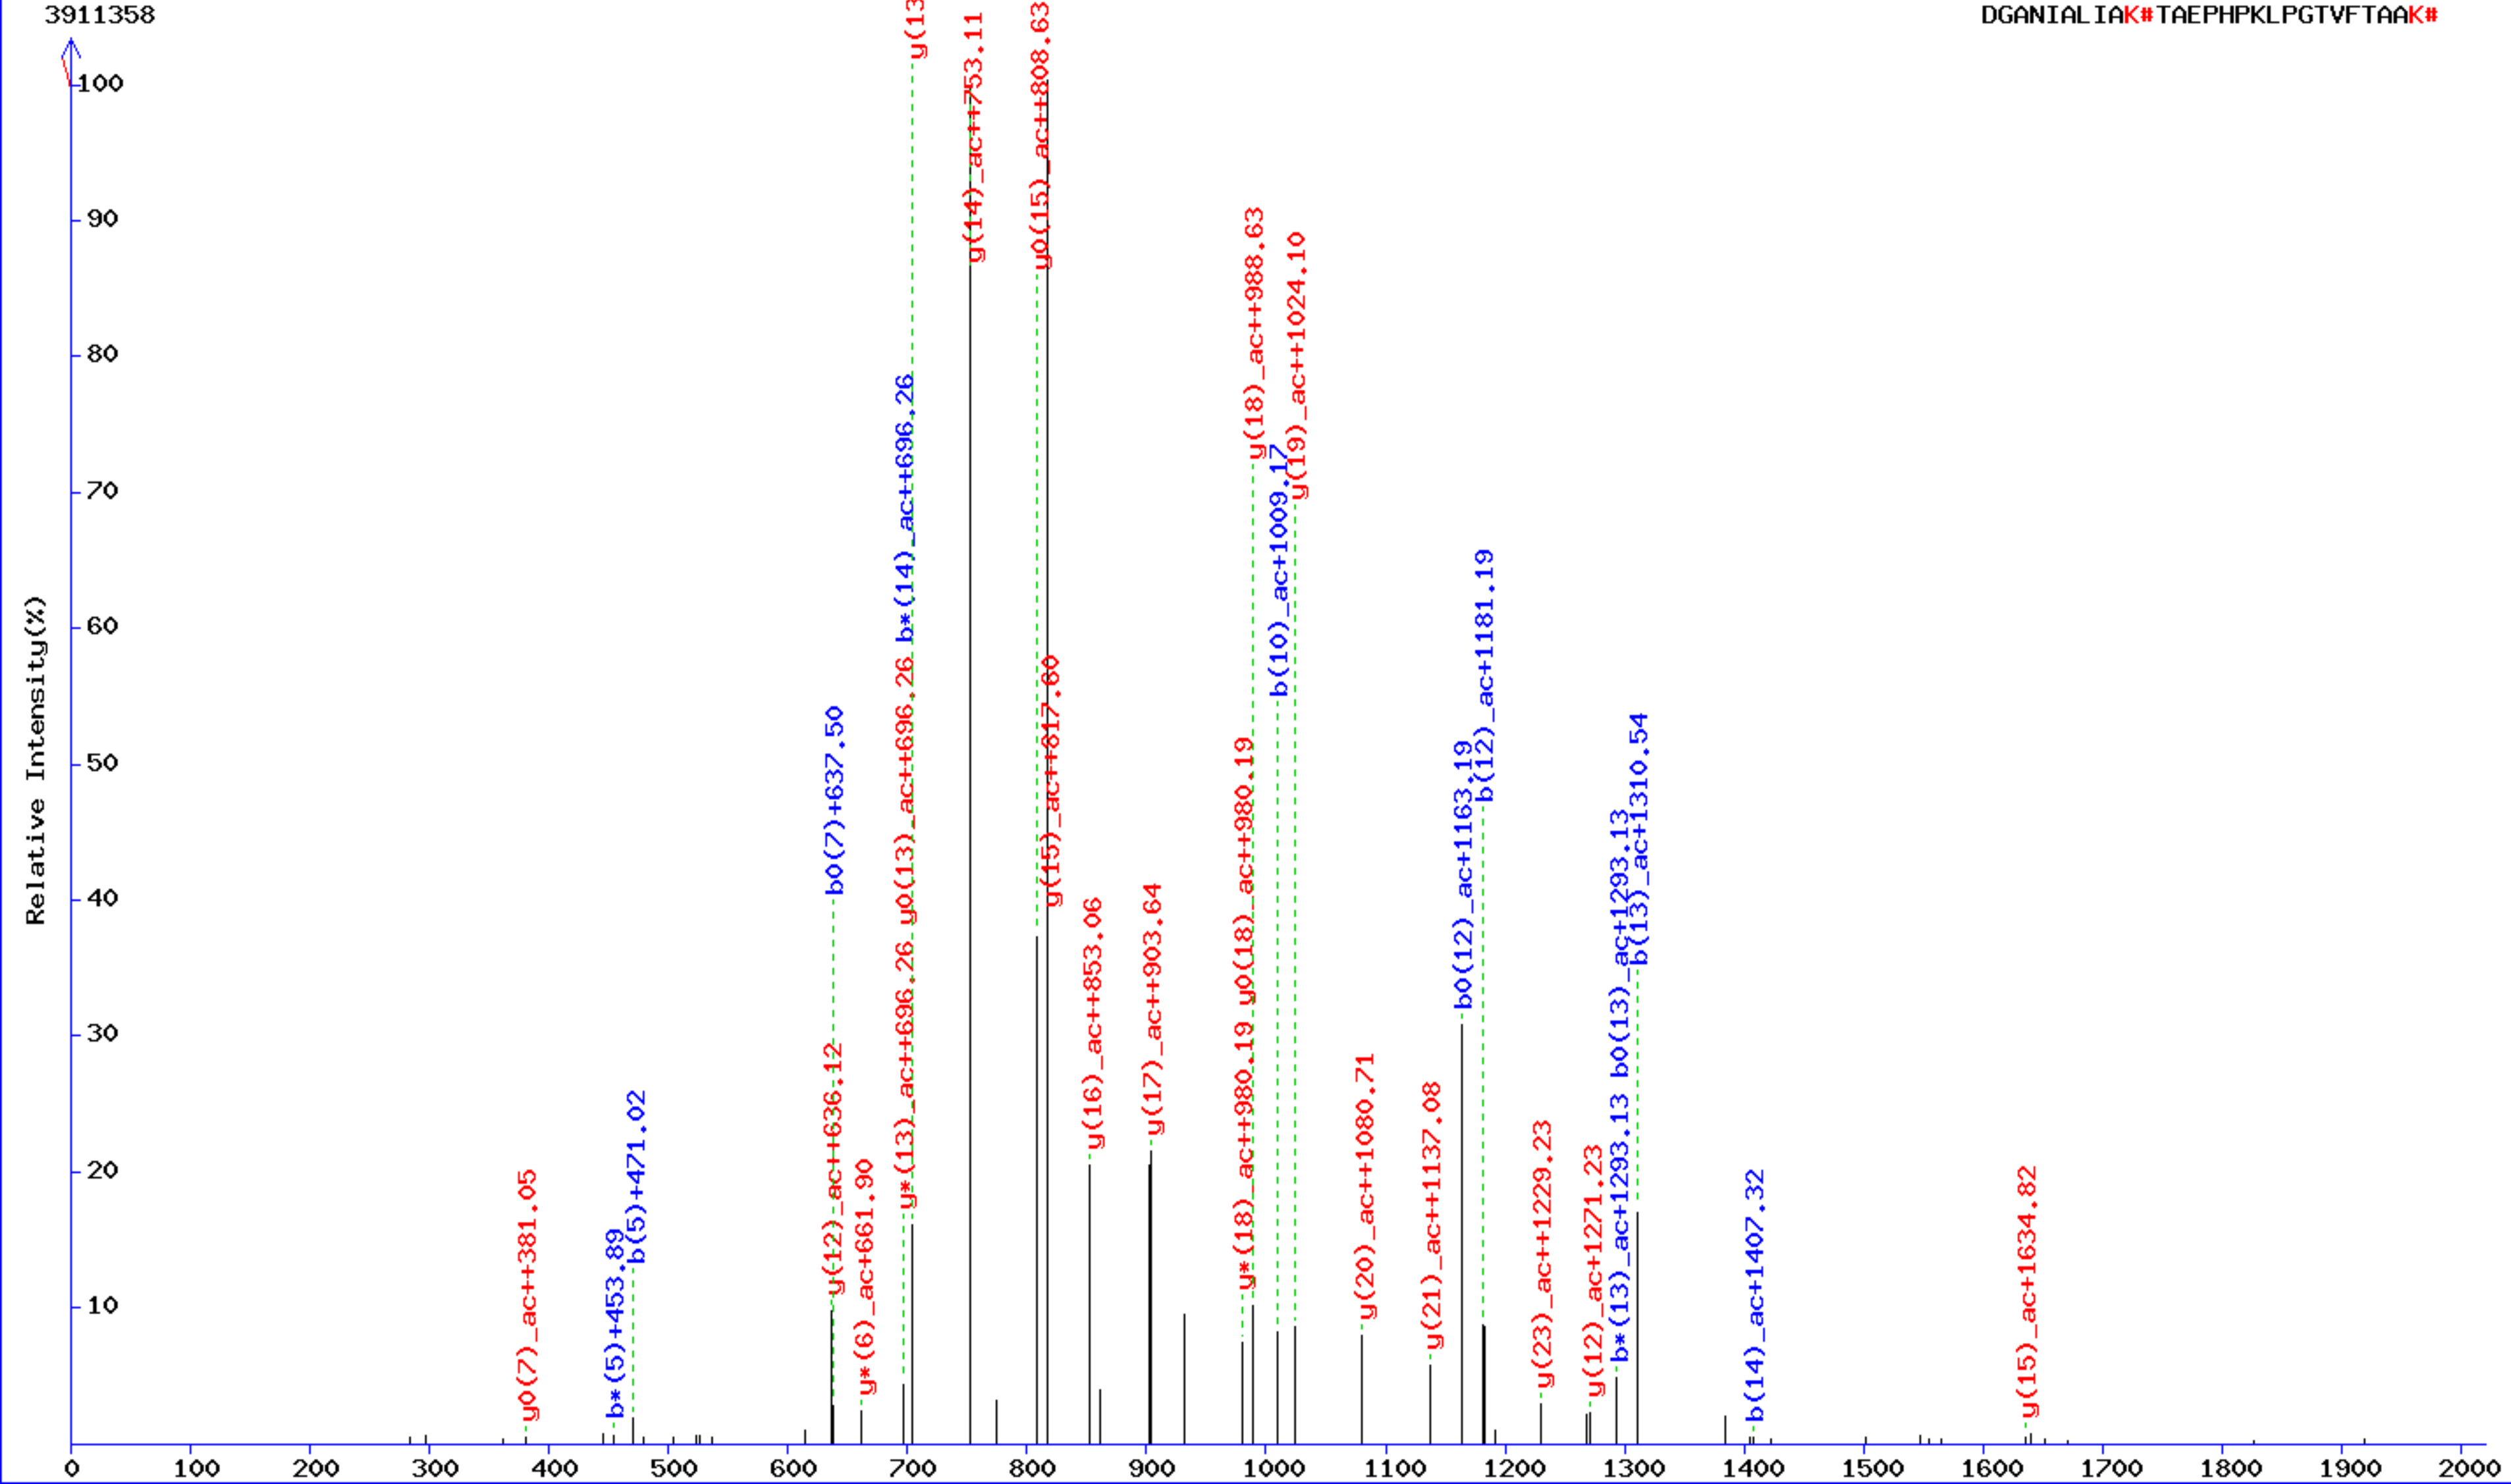

# gi|148660013 MRA\_0257 succinate dehydrogenase flavoprotein subunit

GGK#FLNNWR

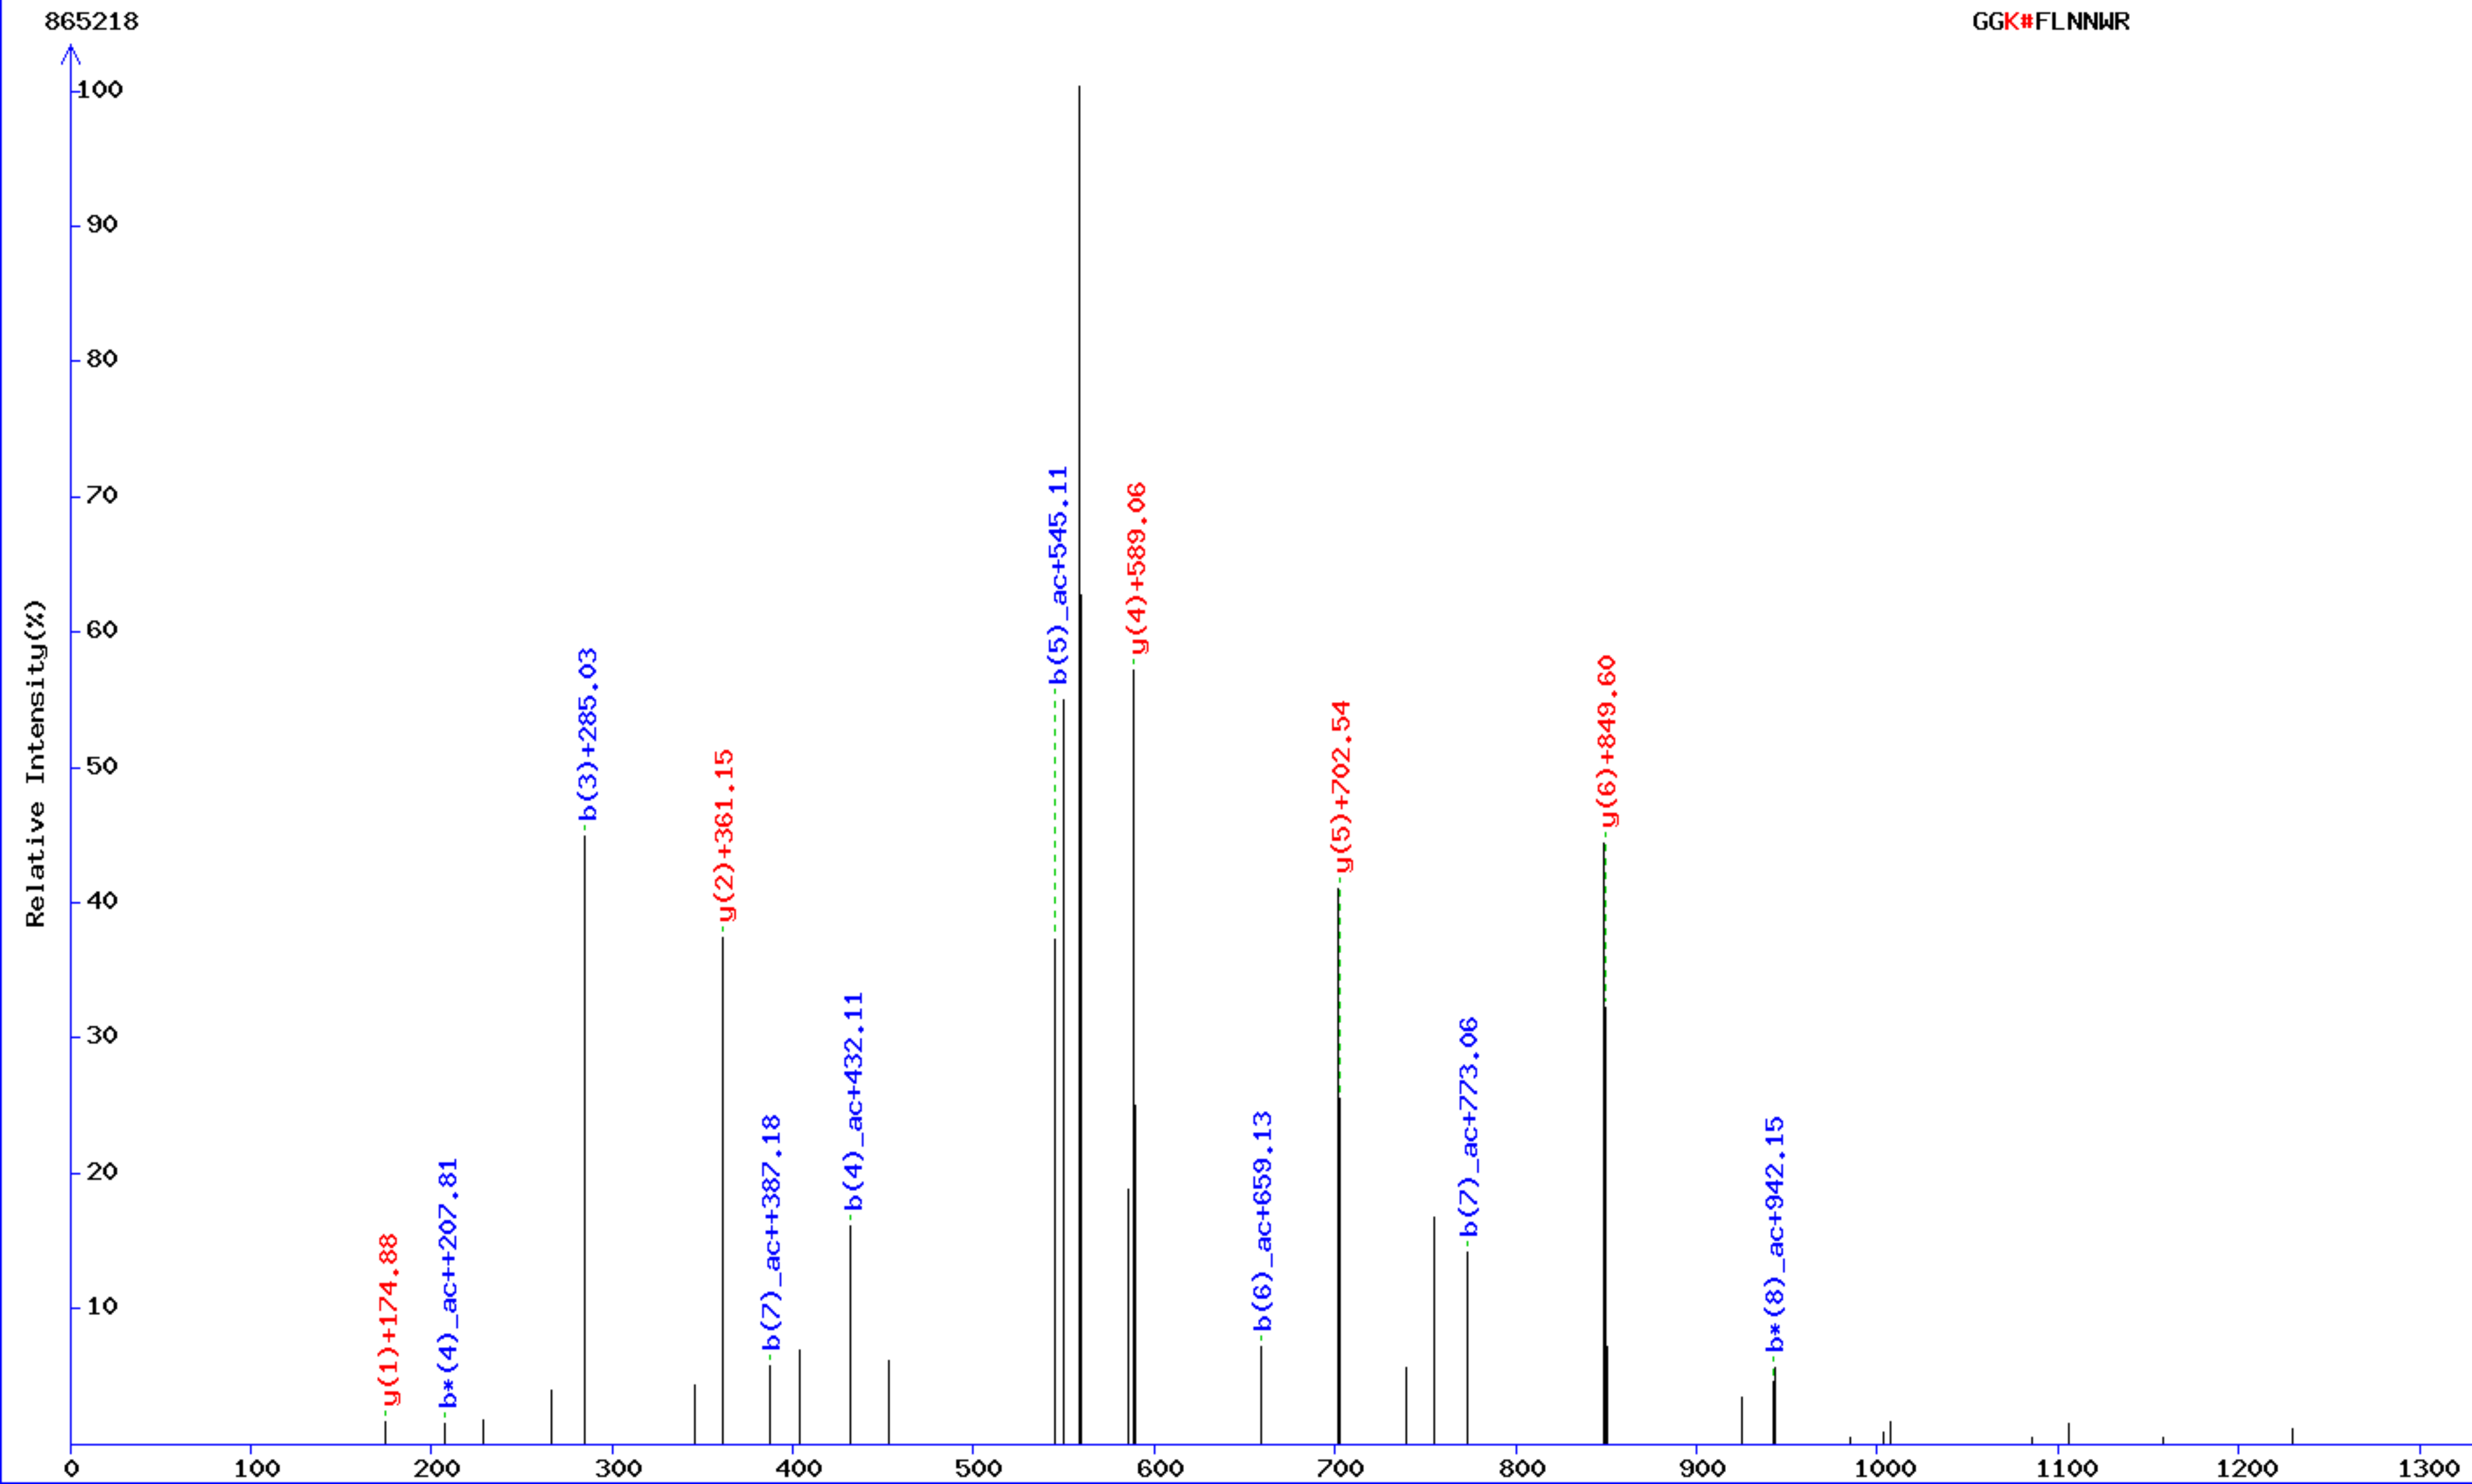

# gi|148660637 MRA\_0868 fatty oxidation complex subunit alpha

GYSEK#LEAK#ALER

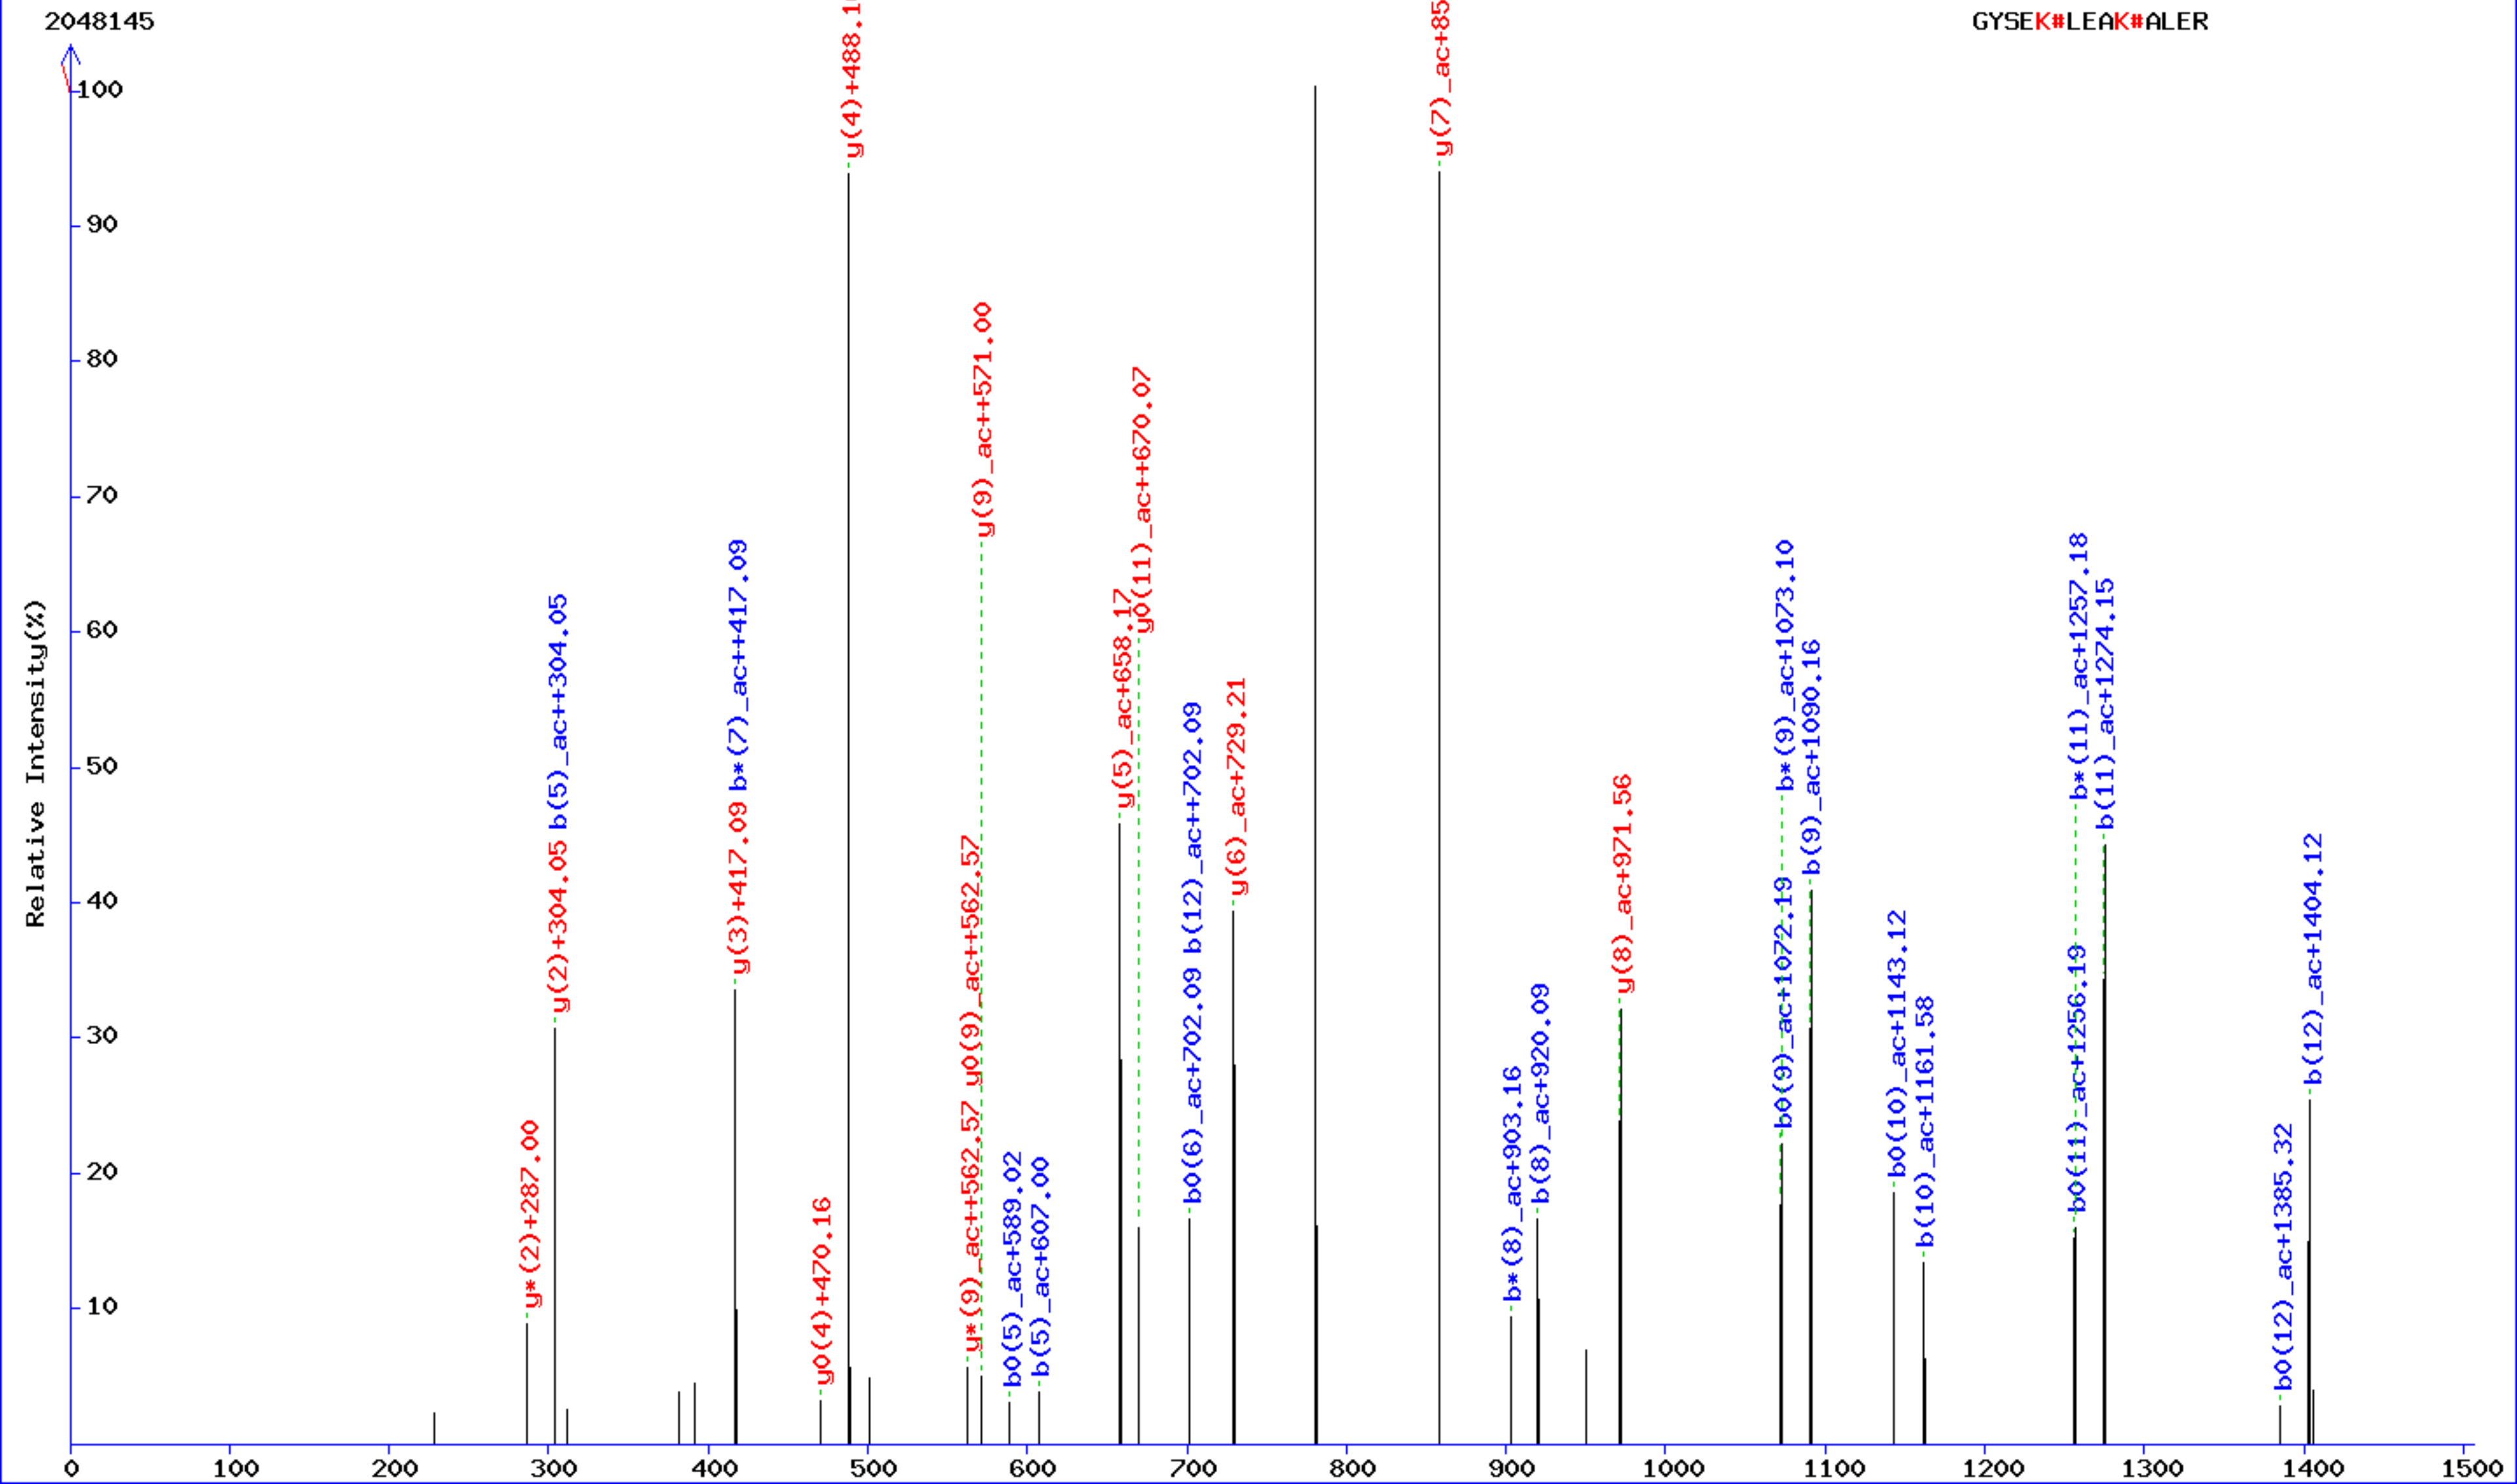

# gi|148662726 MRA\_2907 ribosome recycling factor

TTHQYVTQIDELVK#HK

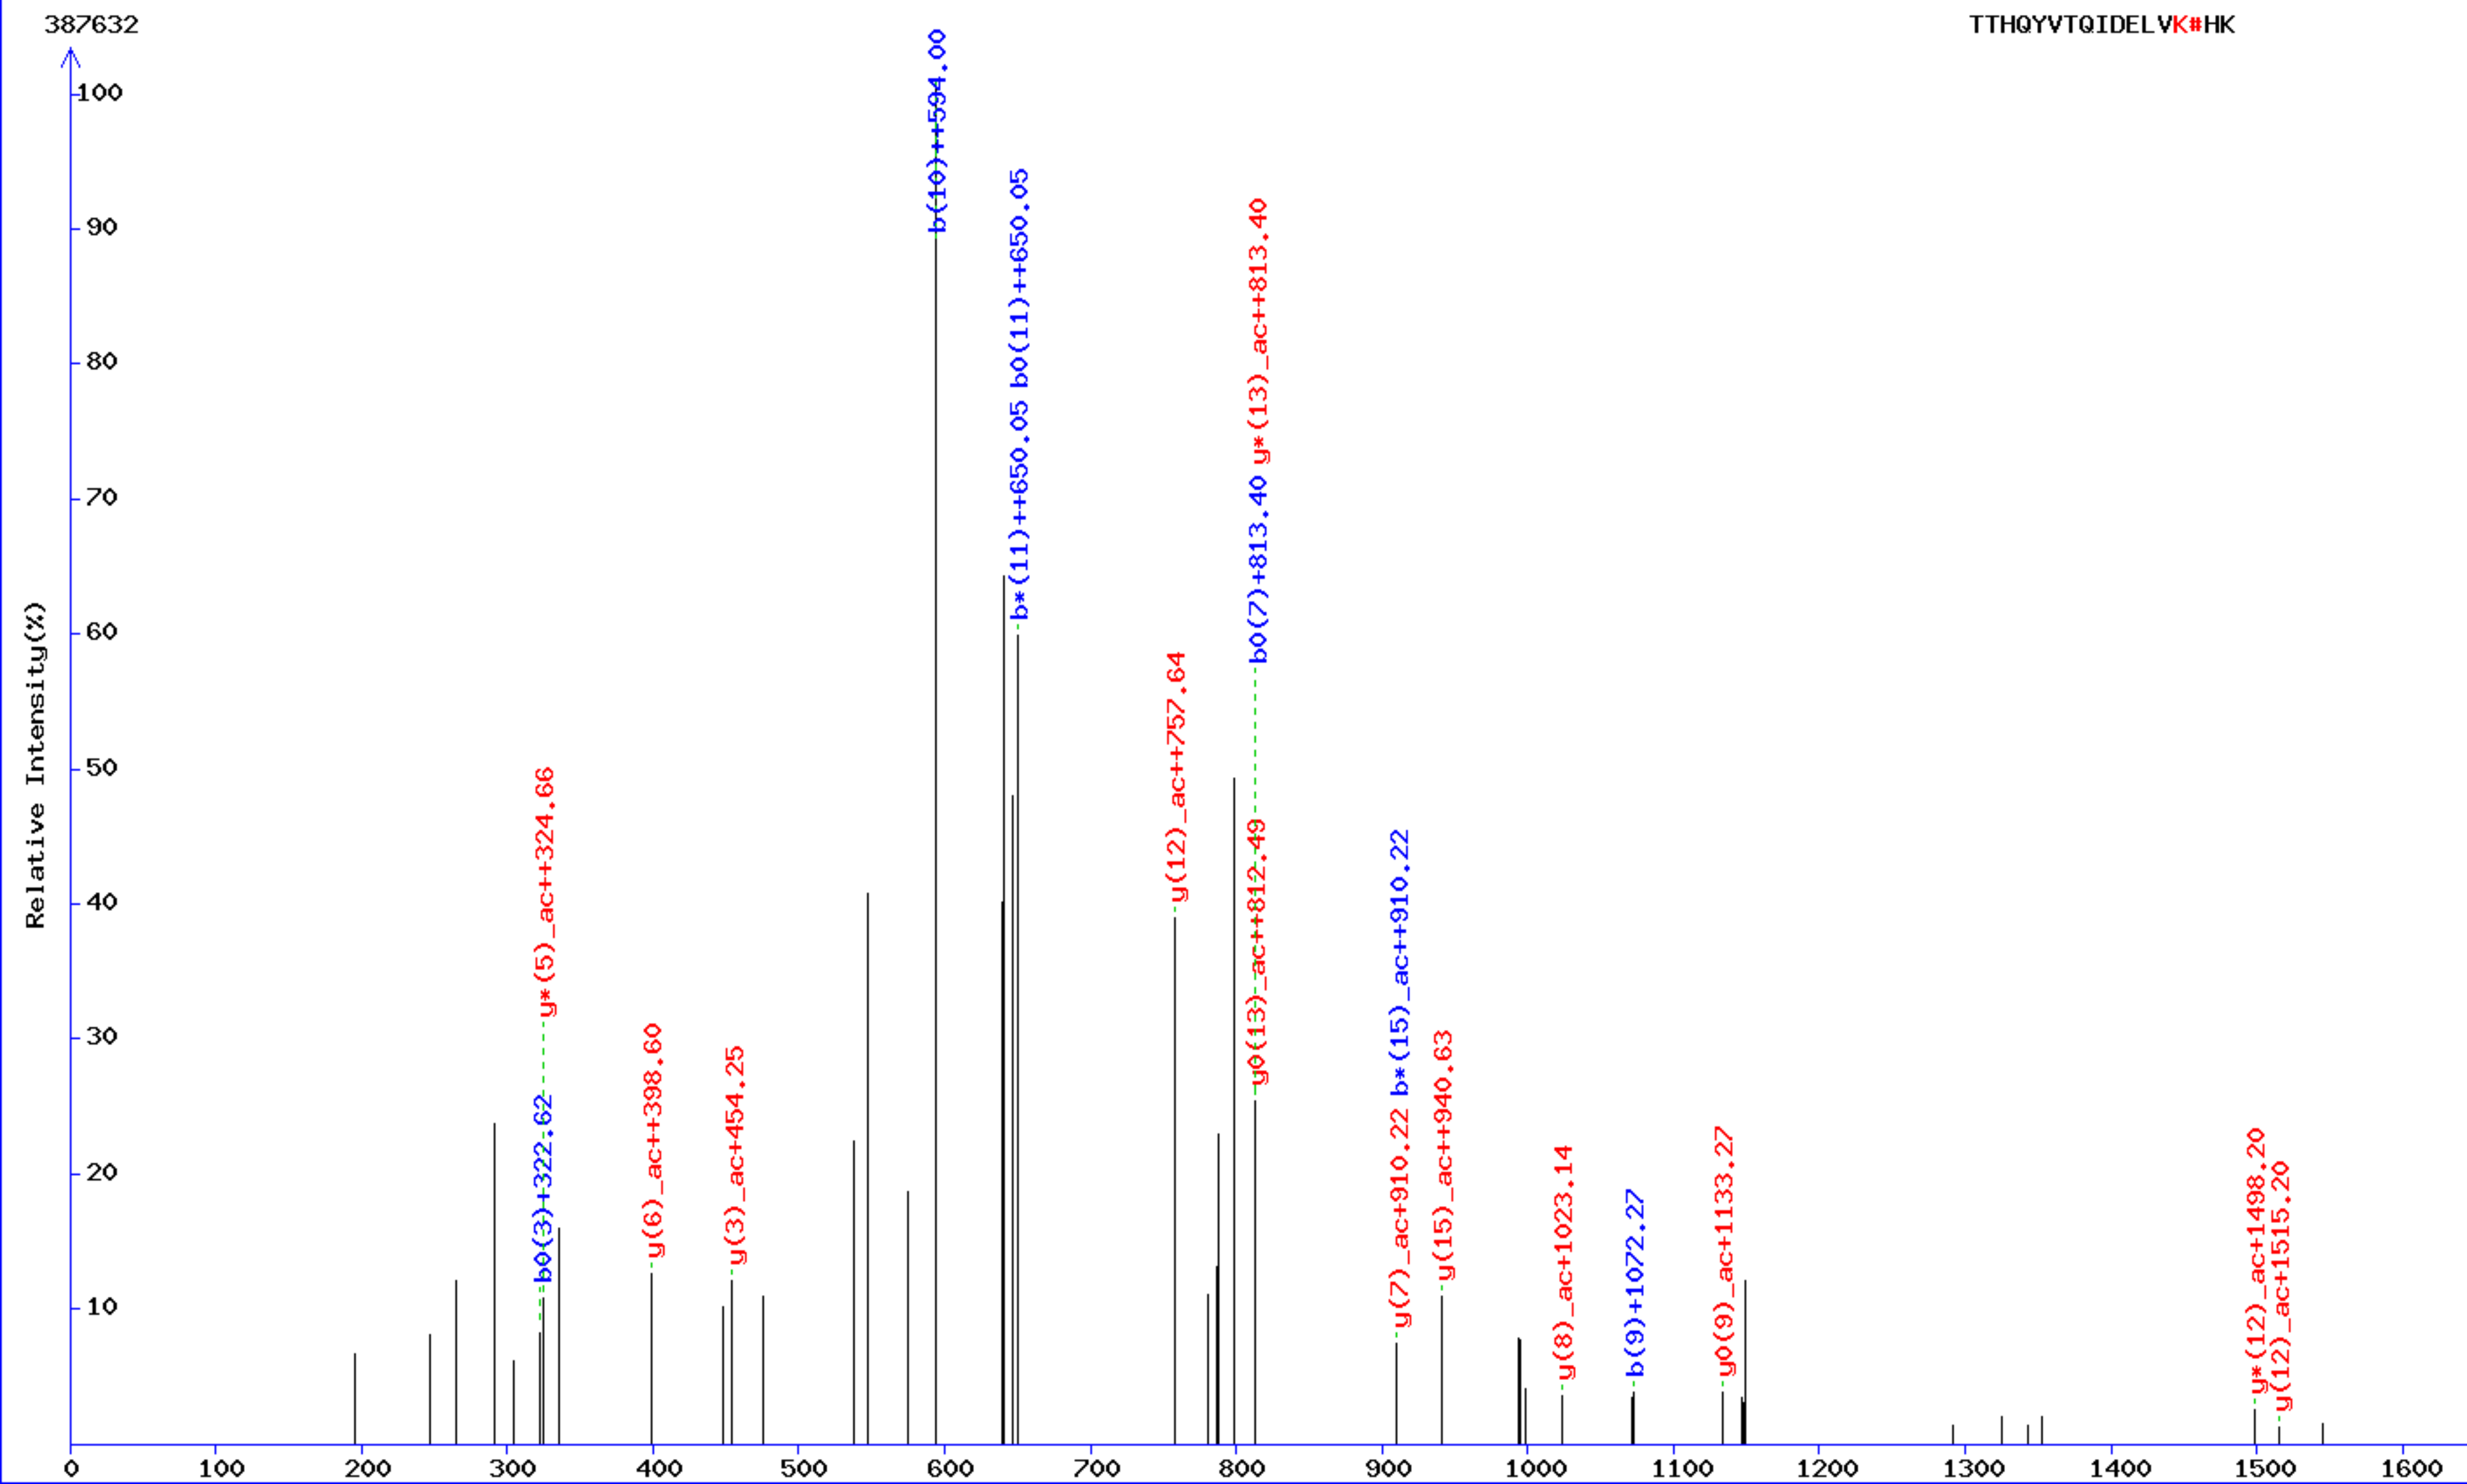

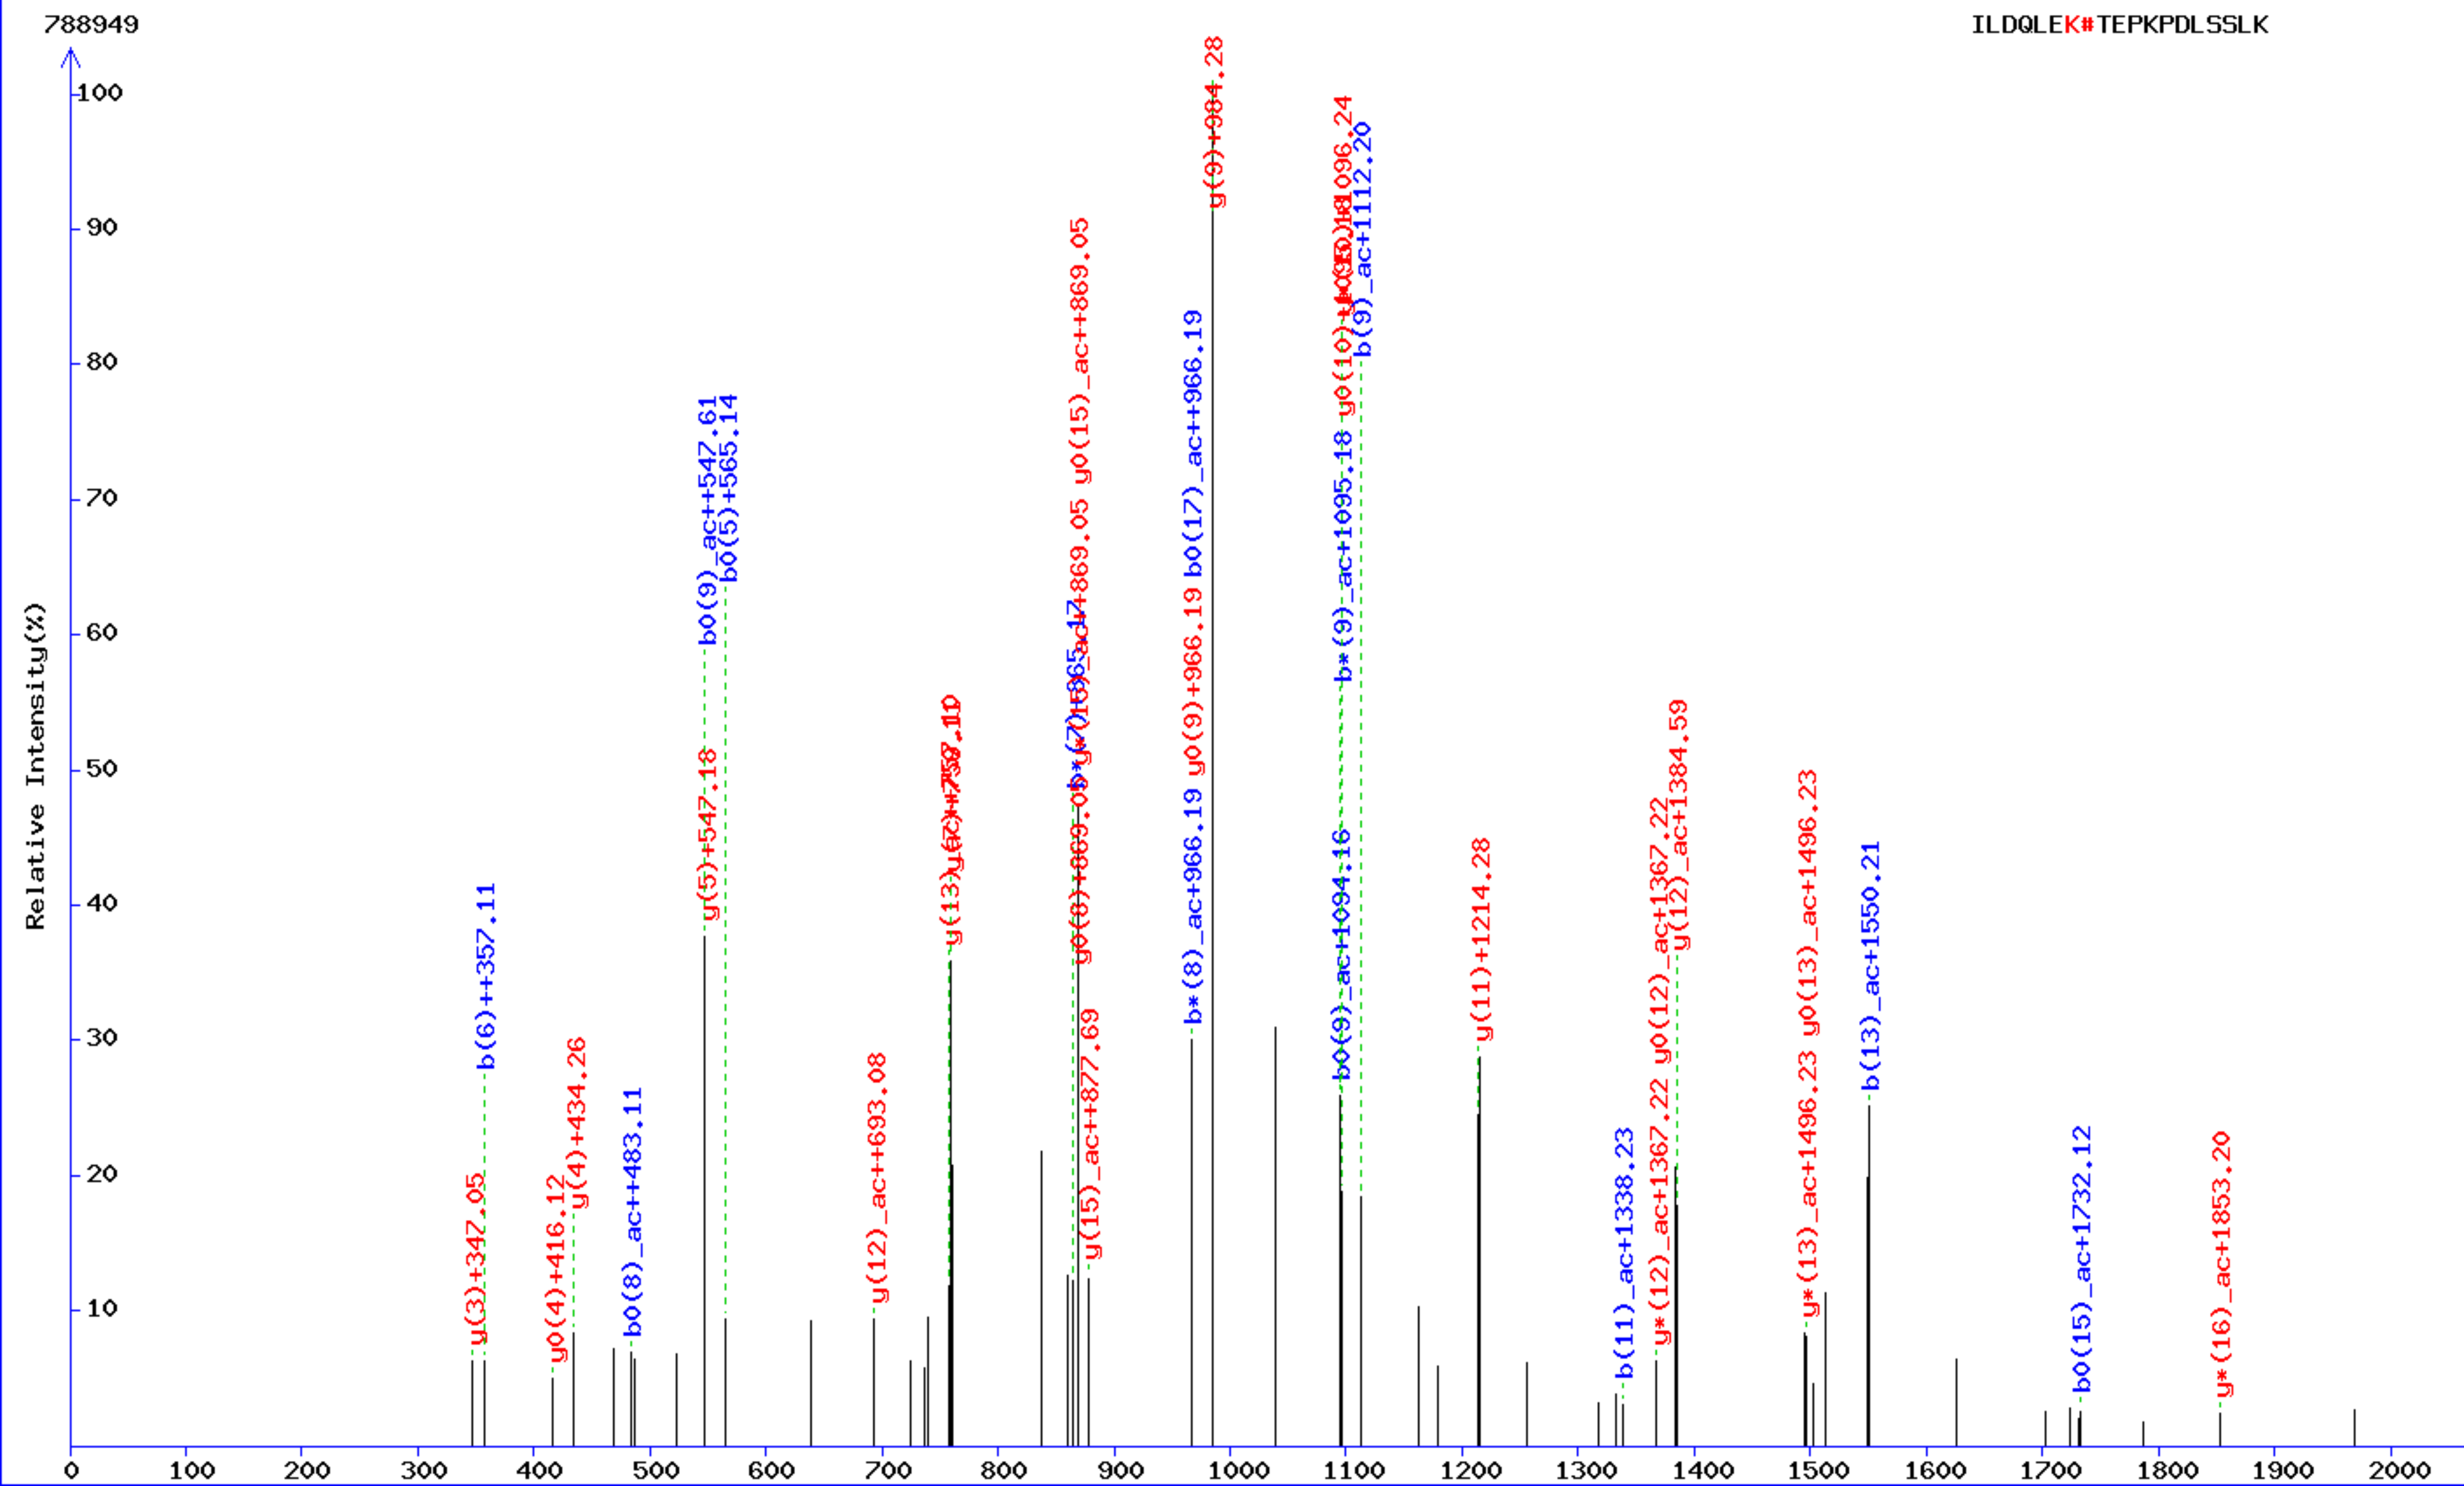

# gi|148660426 MRA\_0663 50S ribosomal protein L7/L12

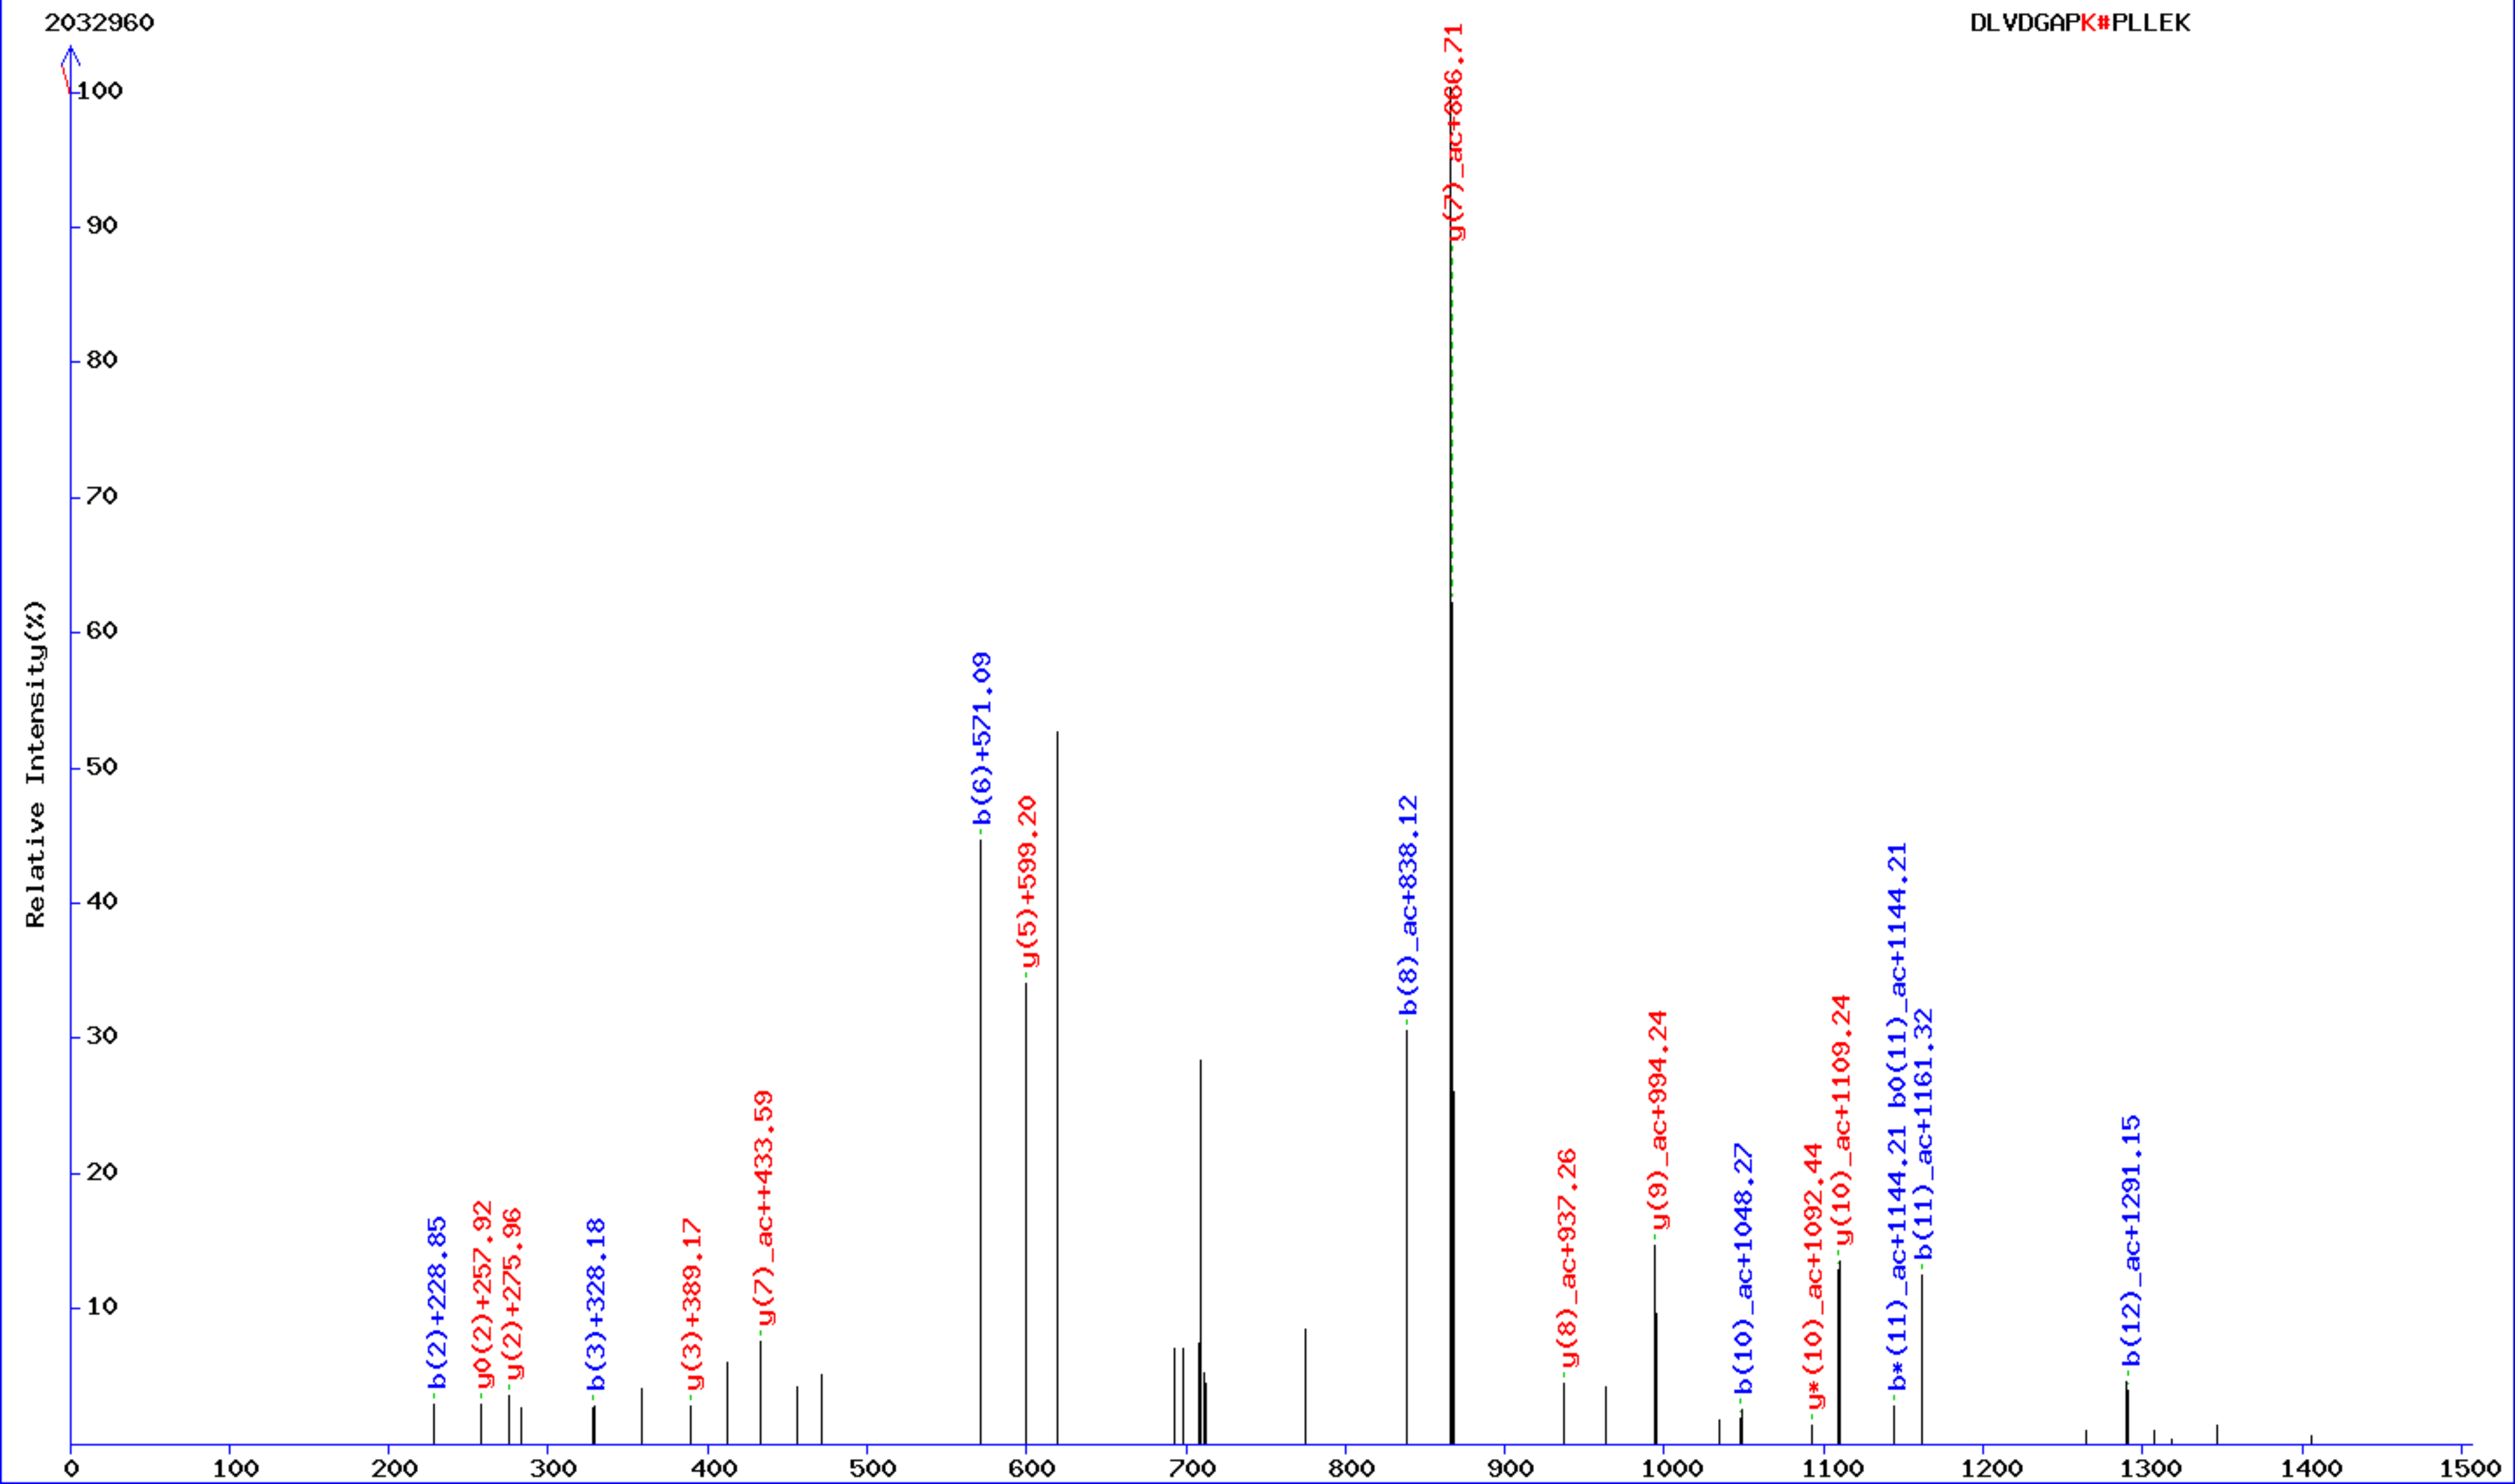

gi|148660602 MRA\_0834 fatty acid desaturase

SVDPVELEK#LR

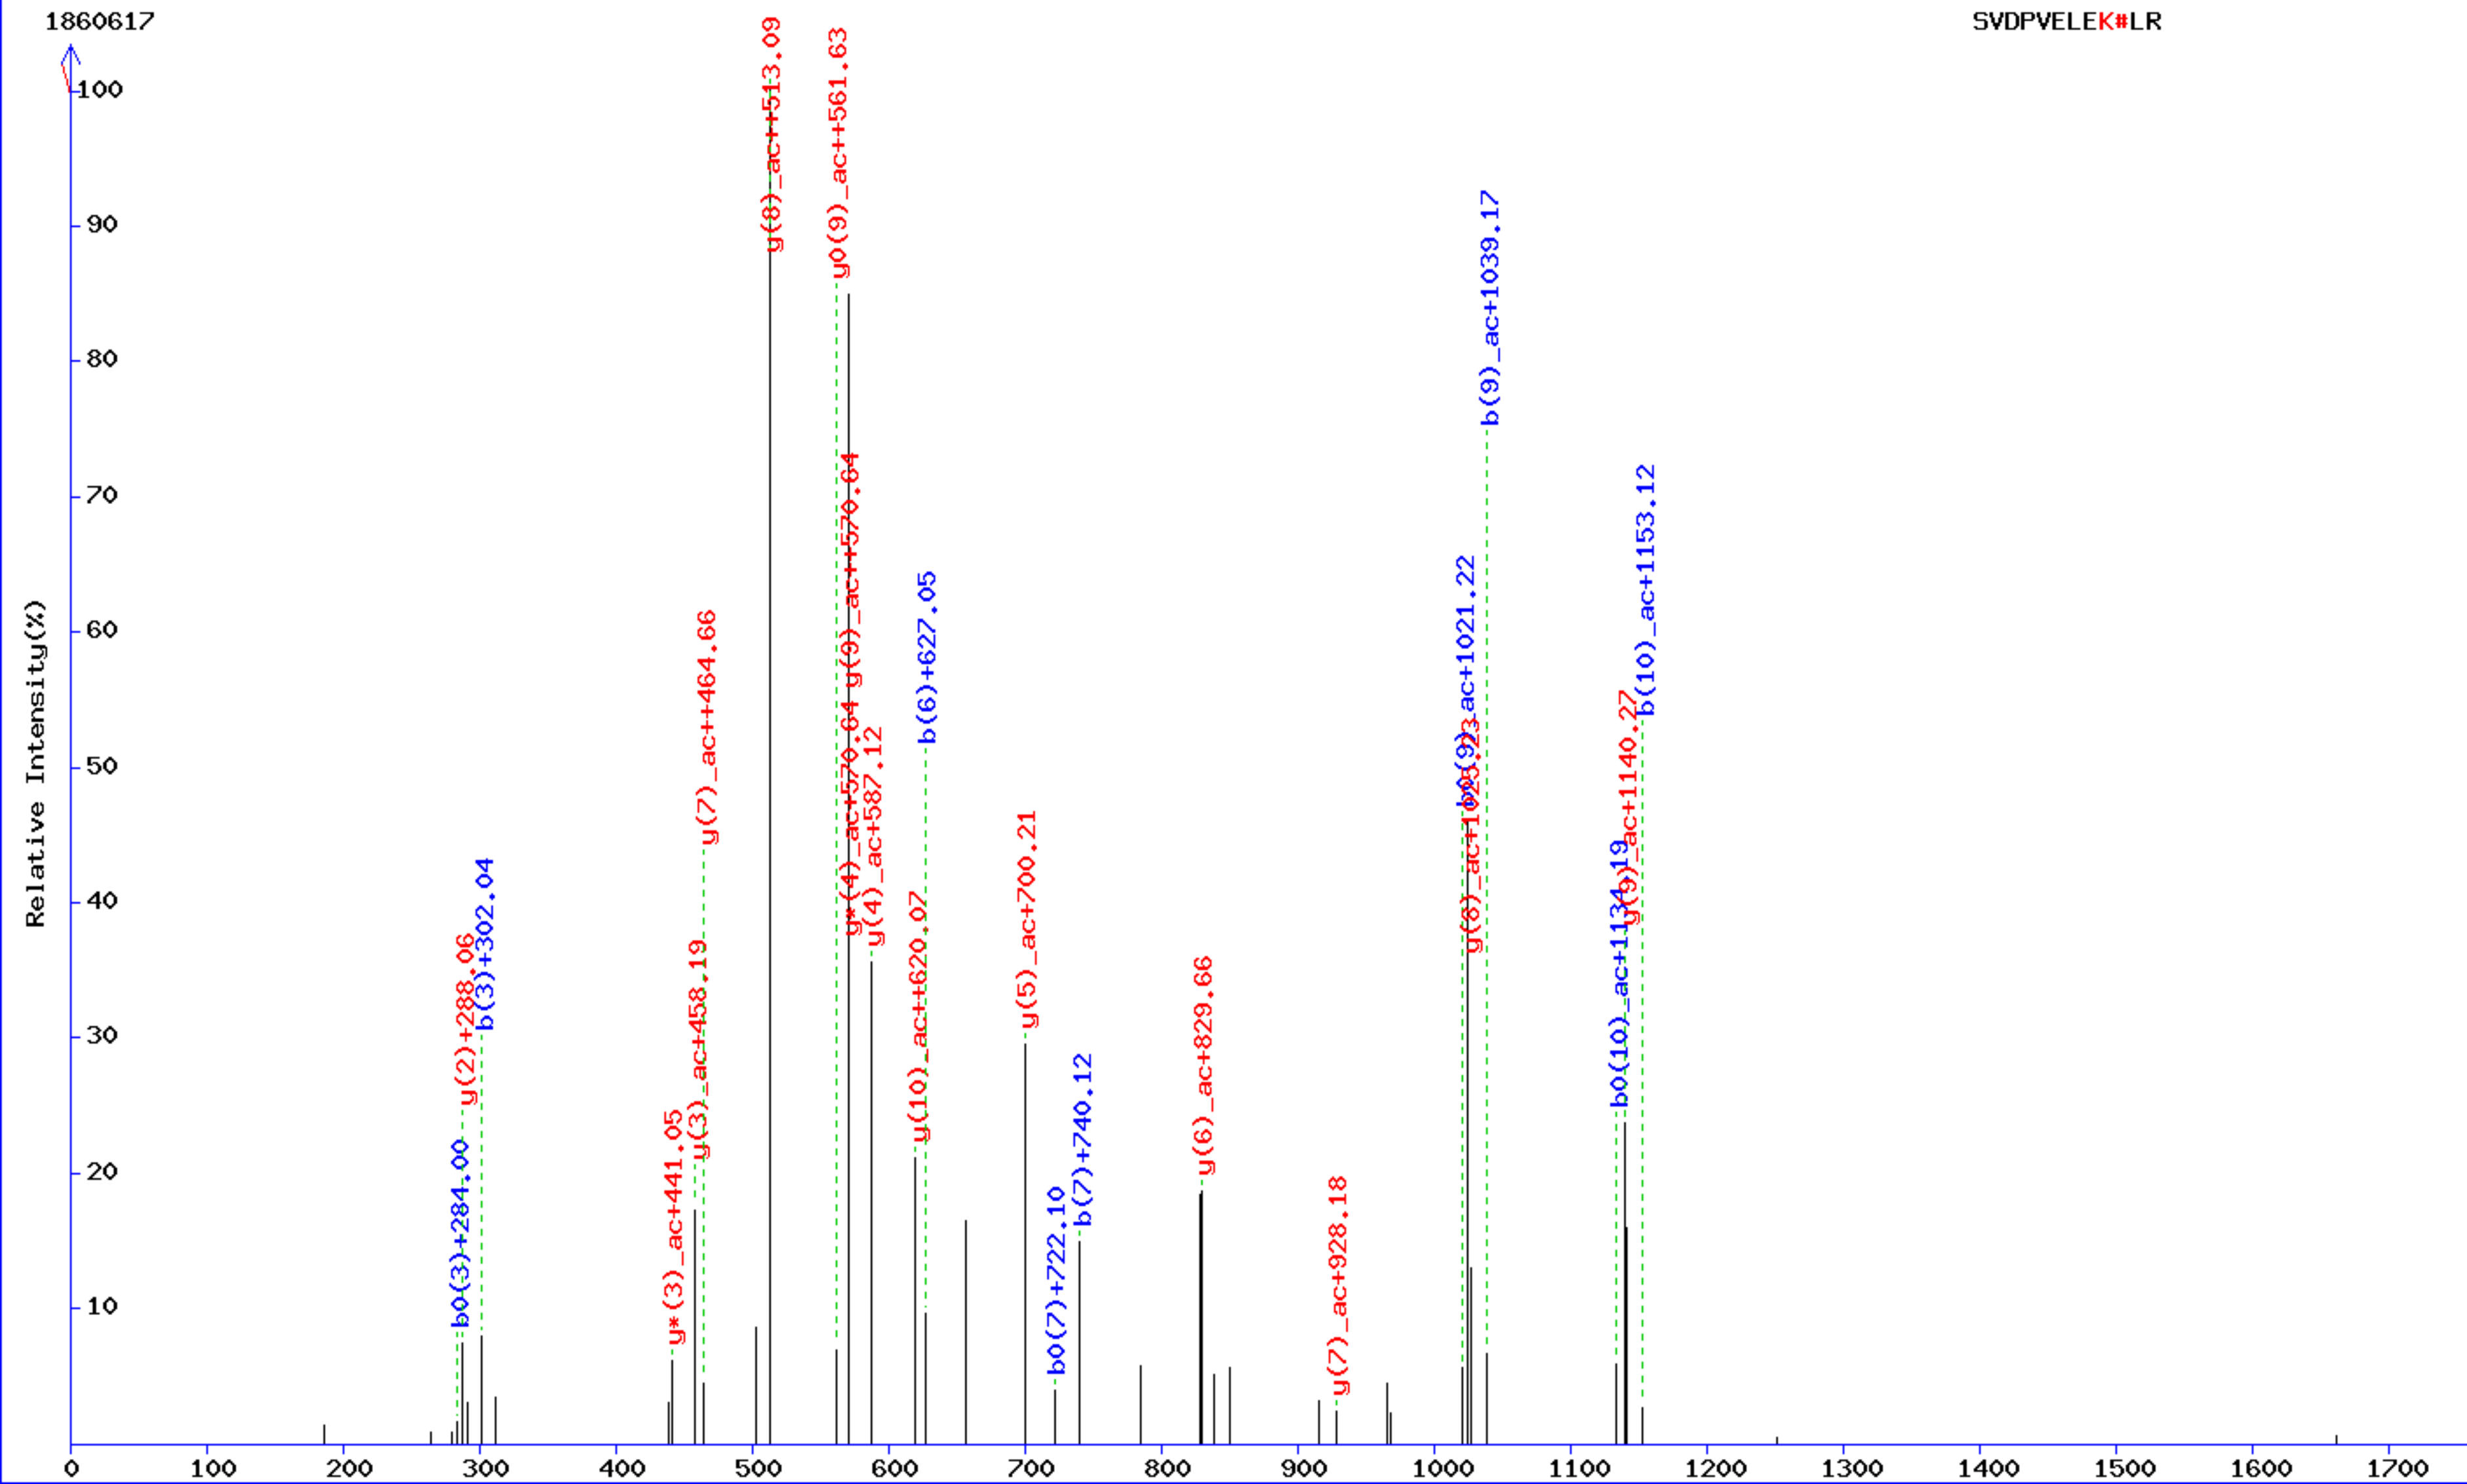

# gi|148661273 MRA\_1490 hypothetical protein

GDIDDPK#LAAALR

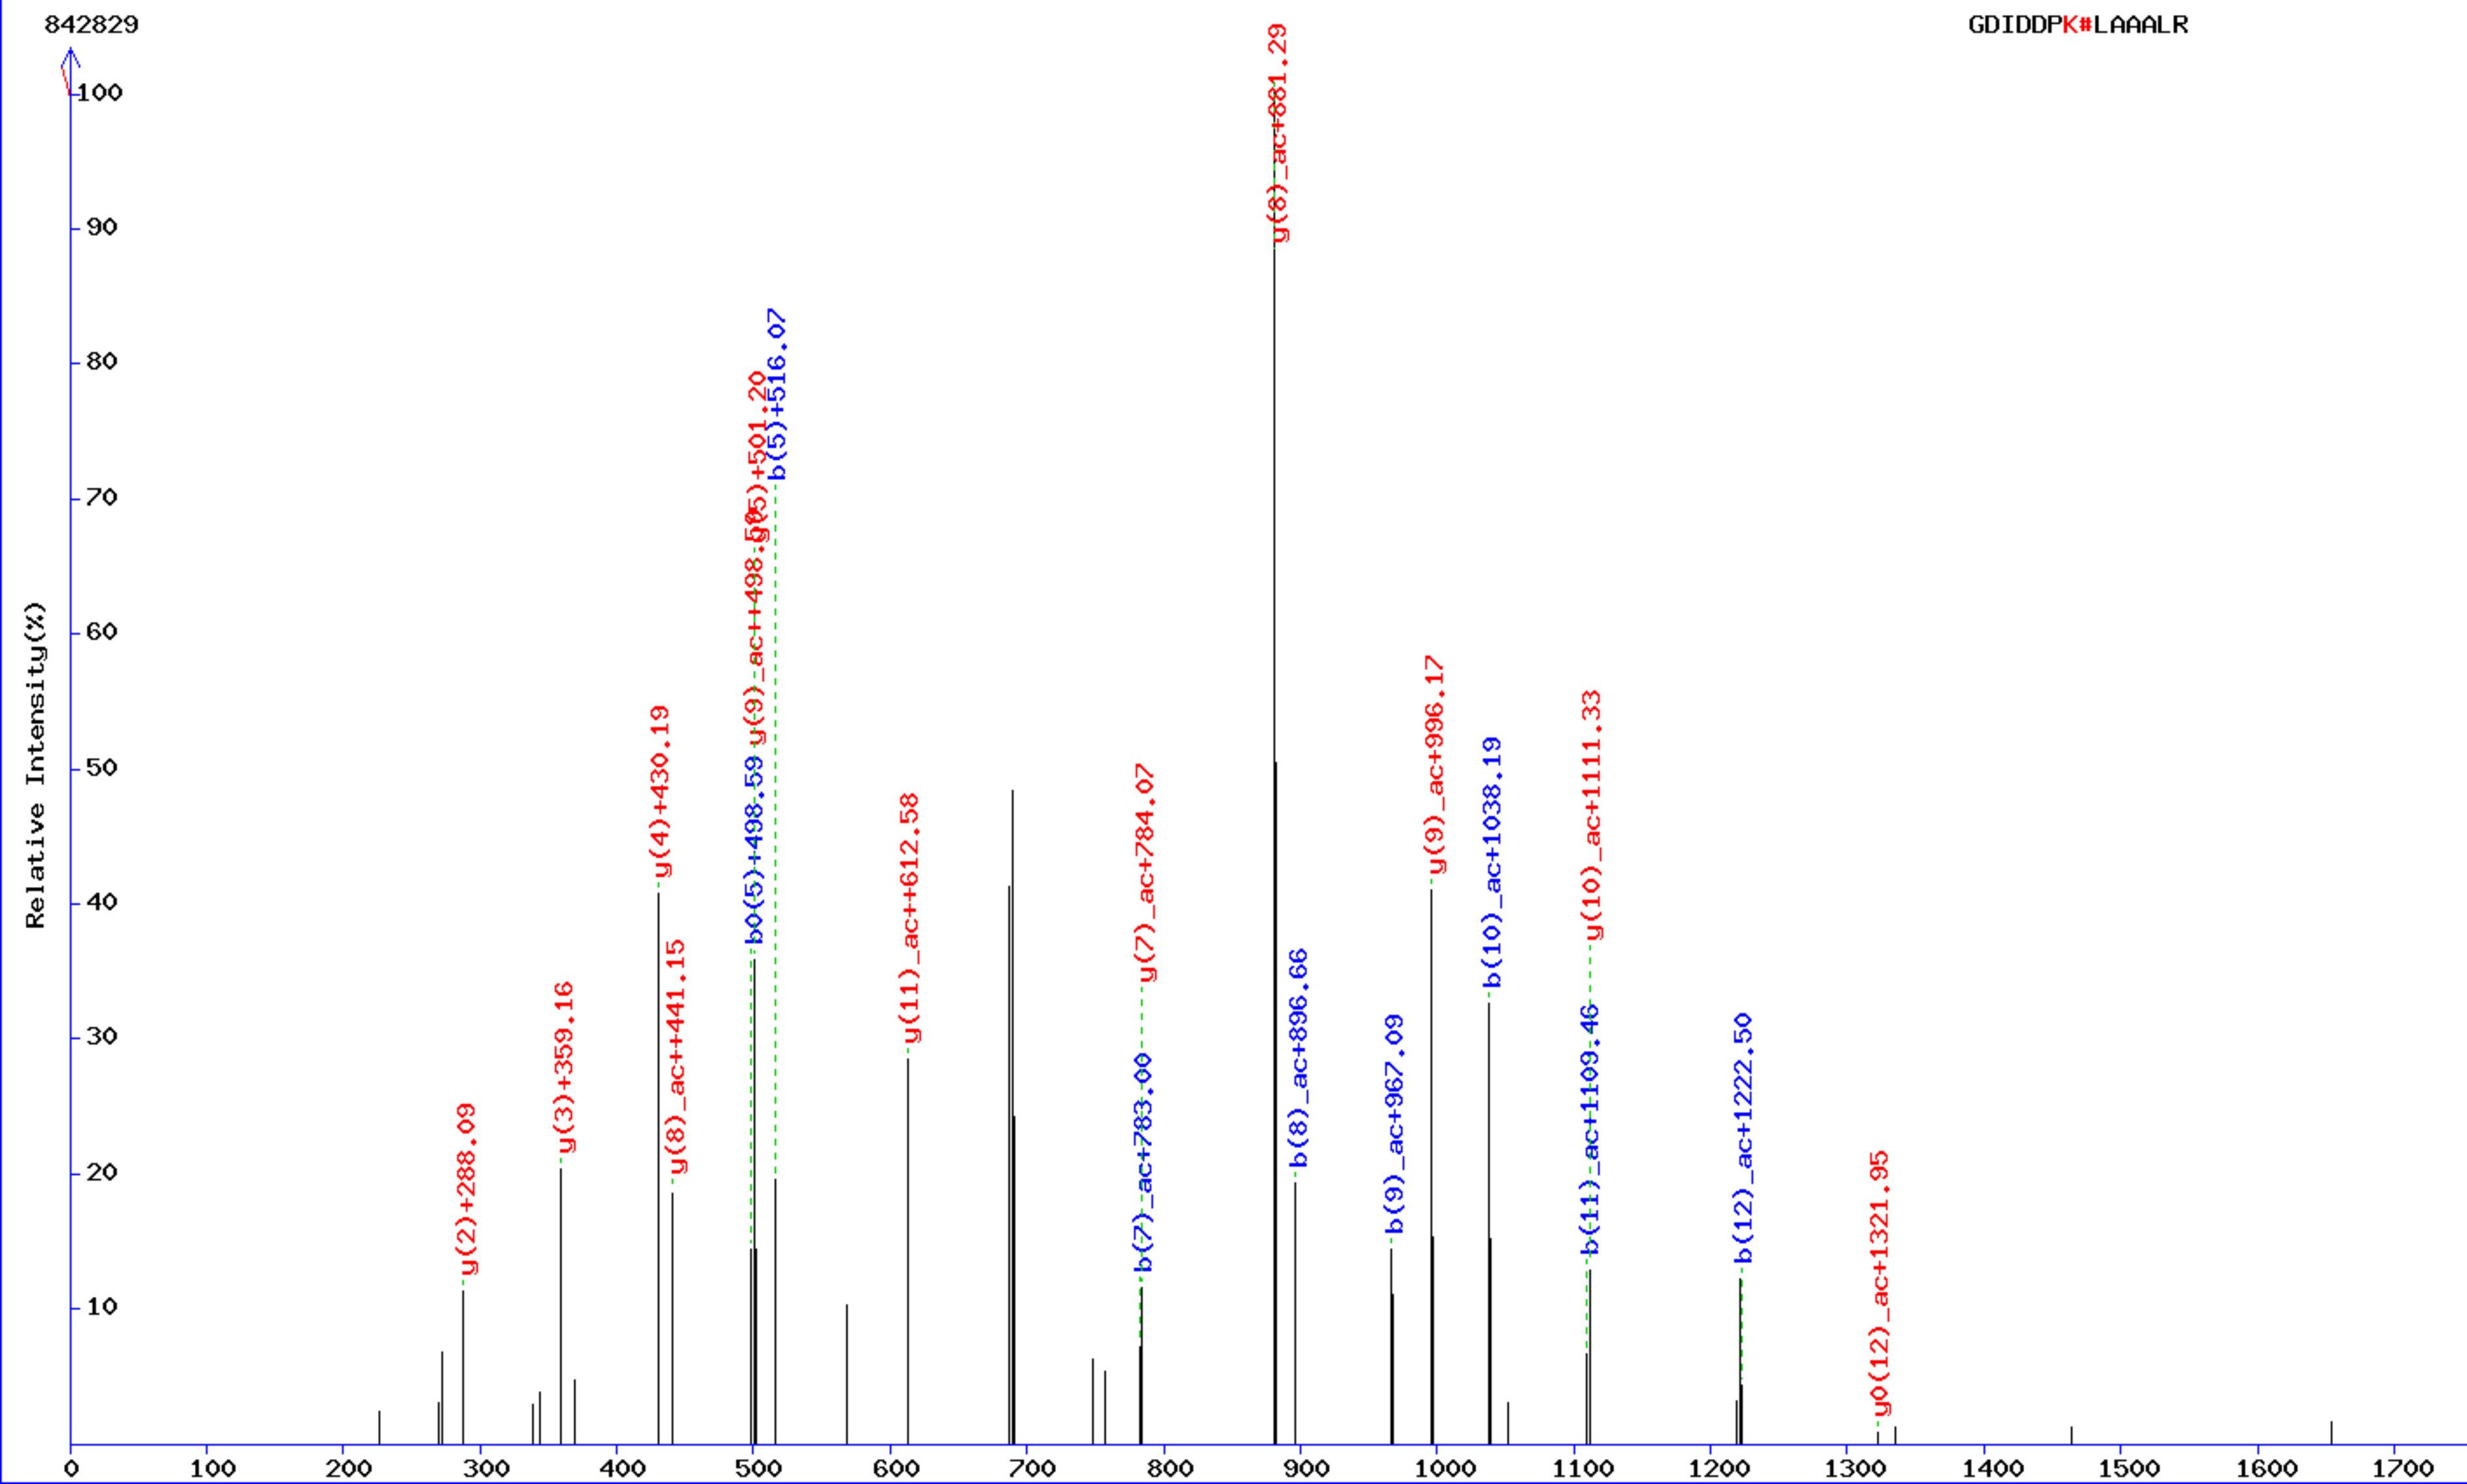



# gi|148660637 MRA\_0868 fatty oxidation complex subunit alpha

LVAEK#DSITGVVVASAK

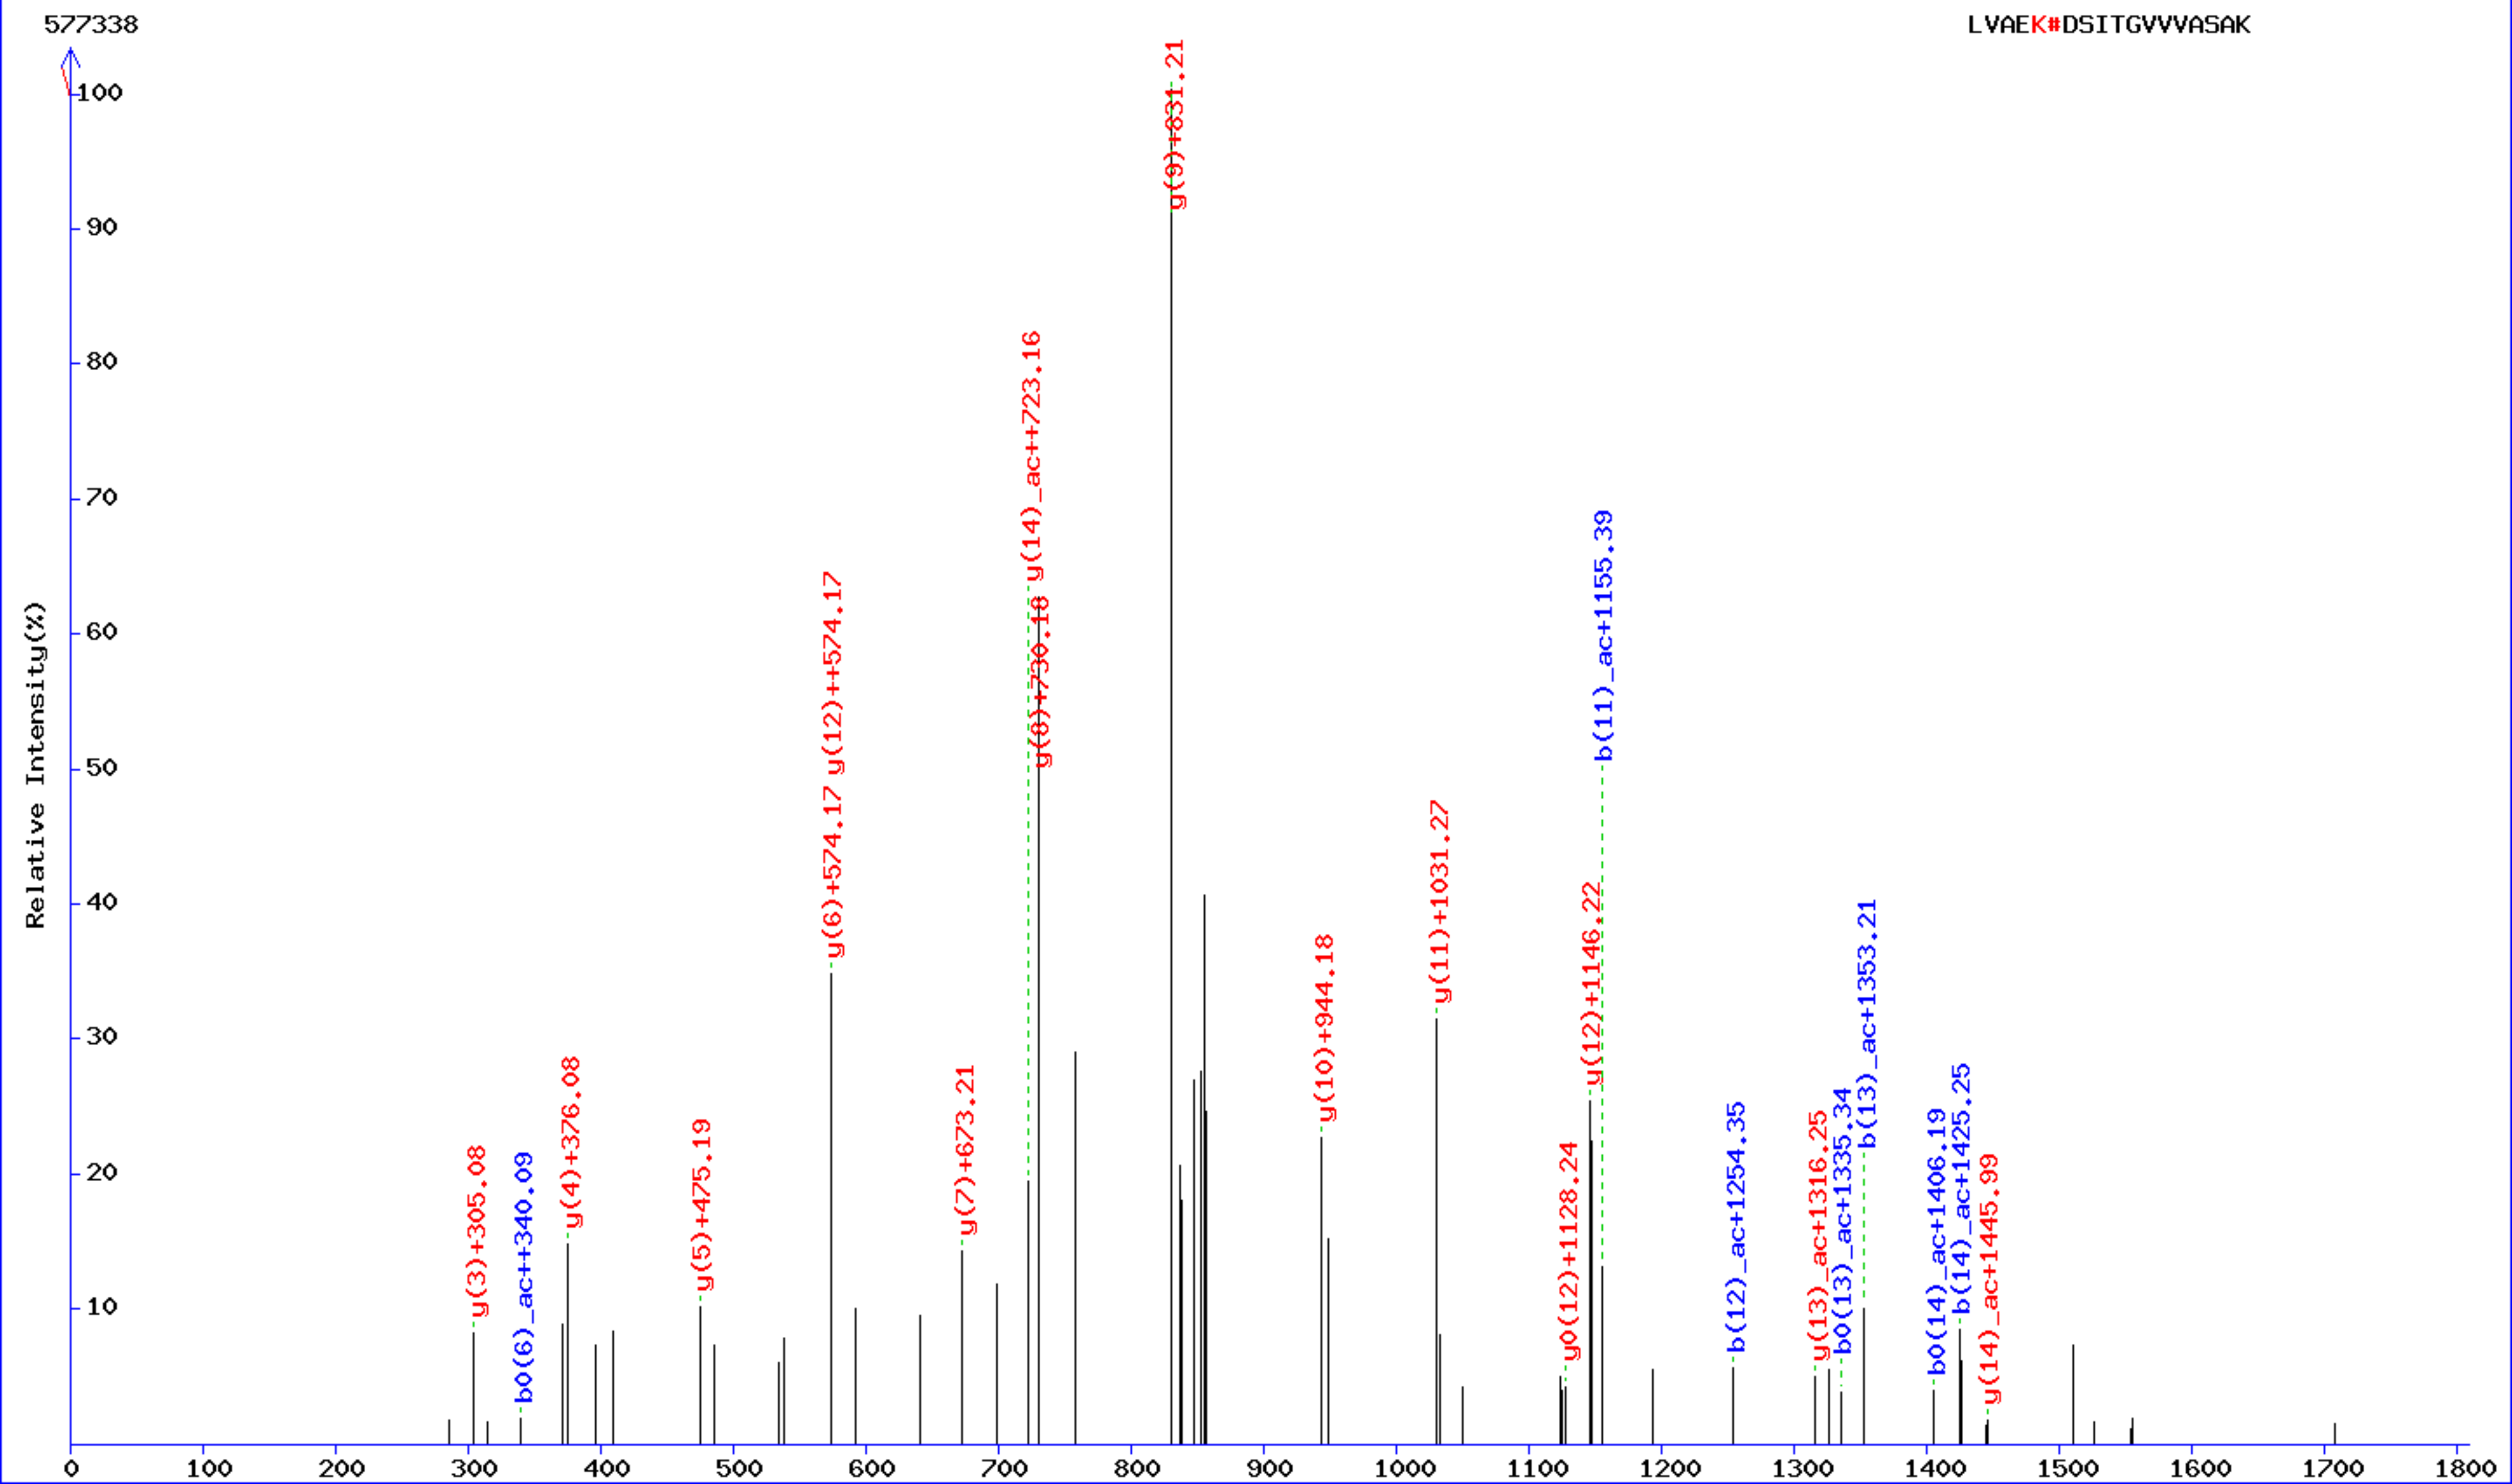

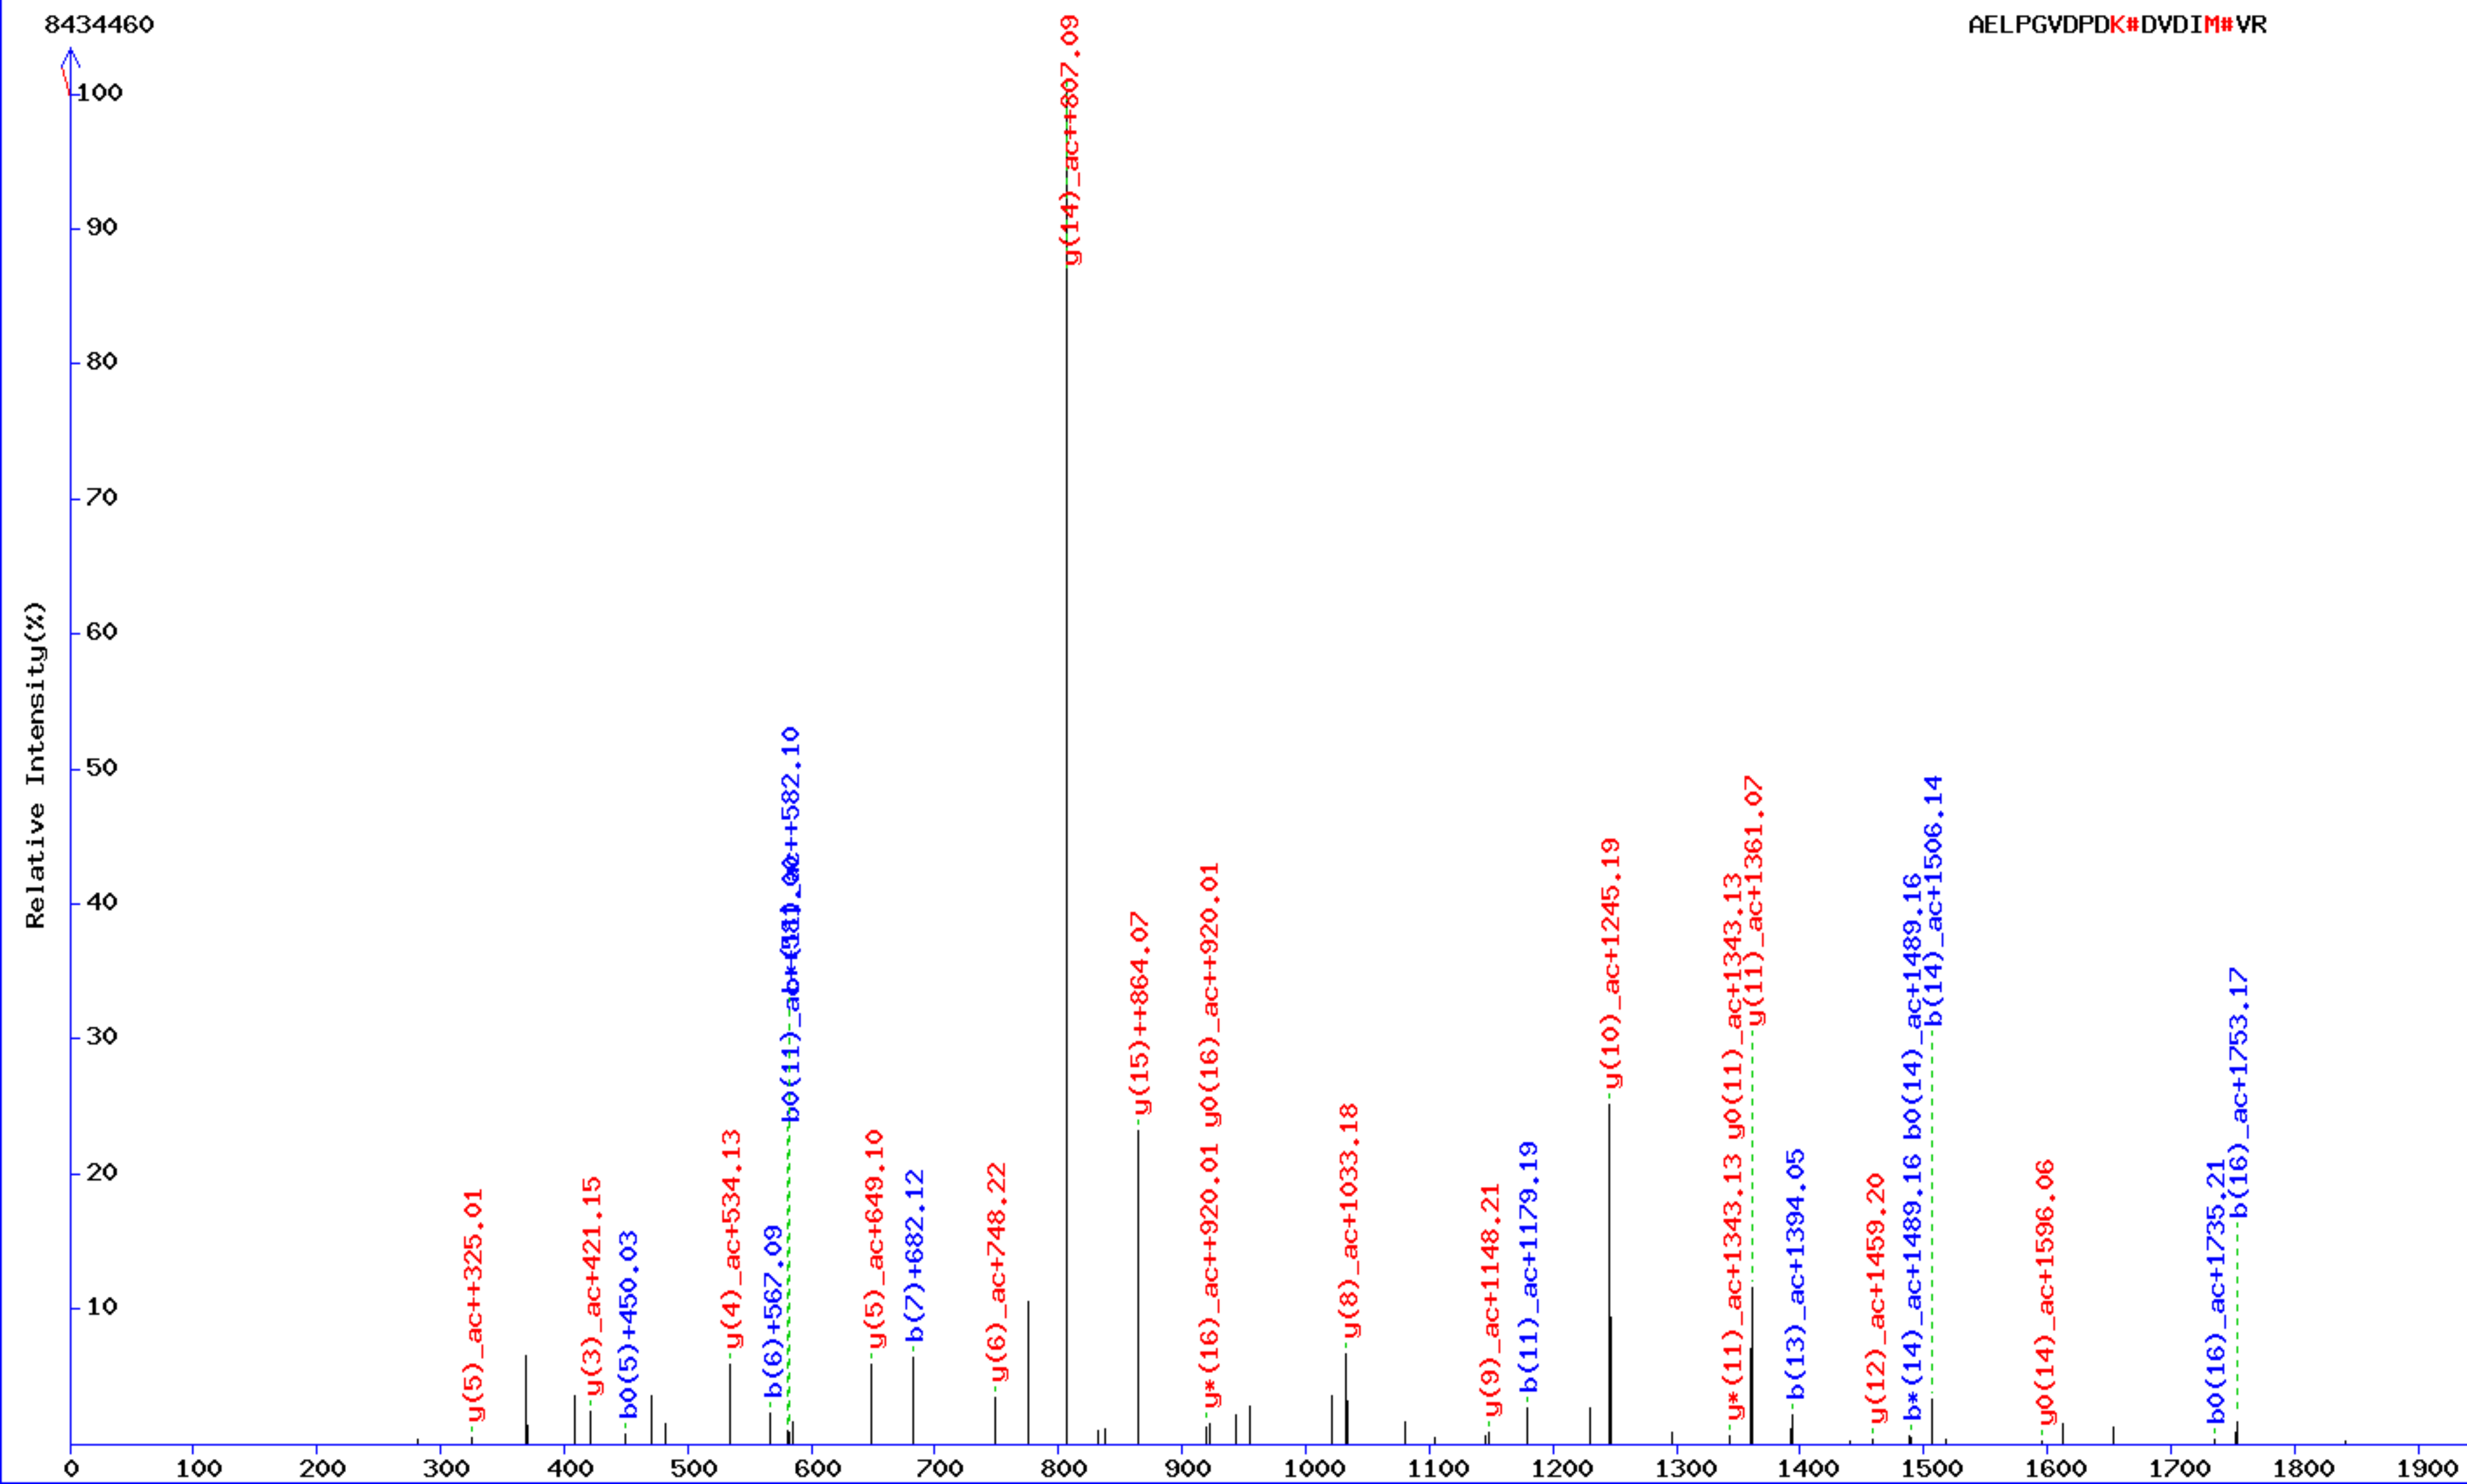

# gi|148663717 MRA\_3889 hypothetical protein

AAYFTDDEYYEK#LDK

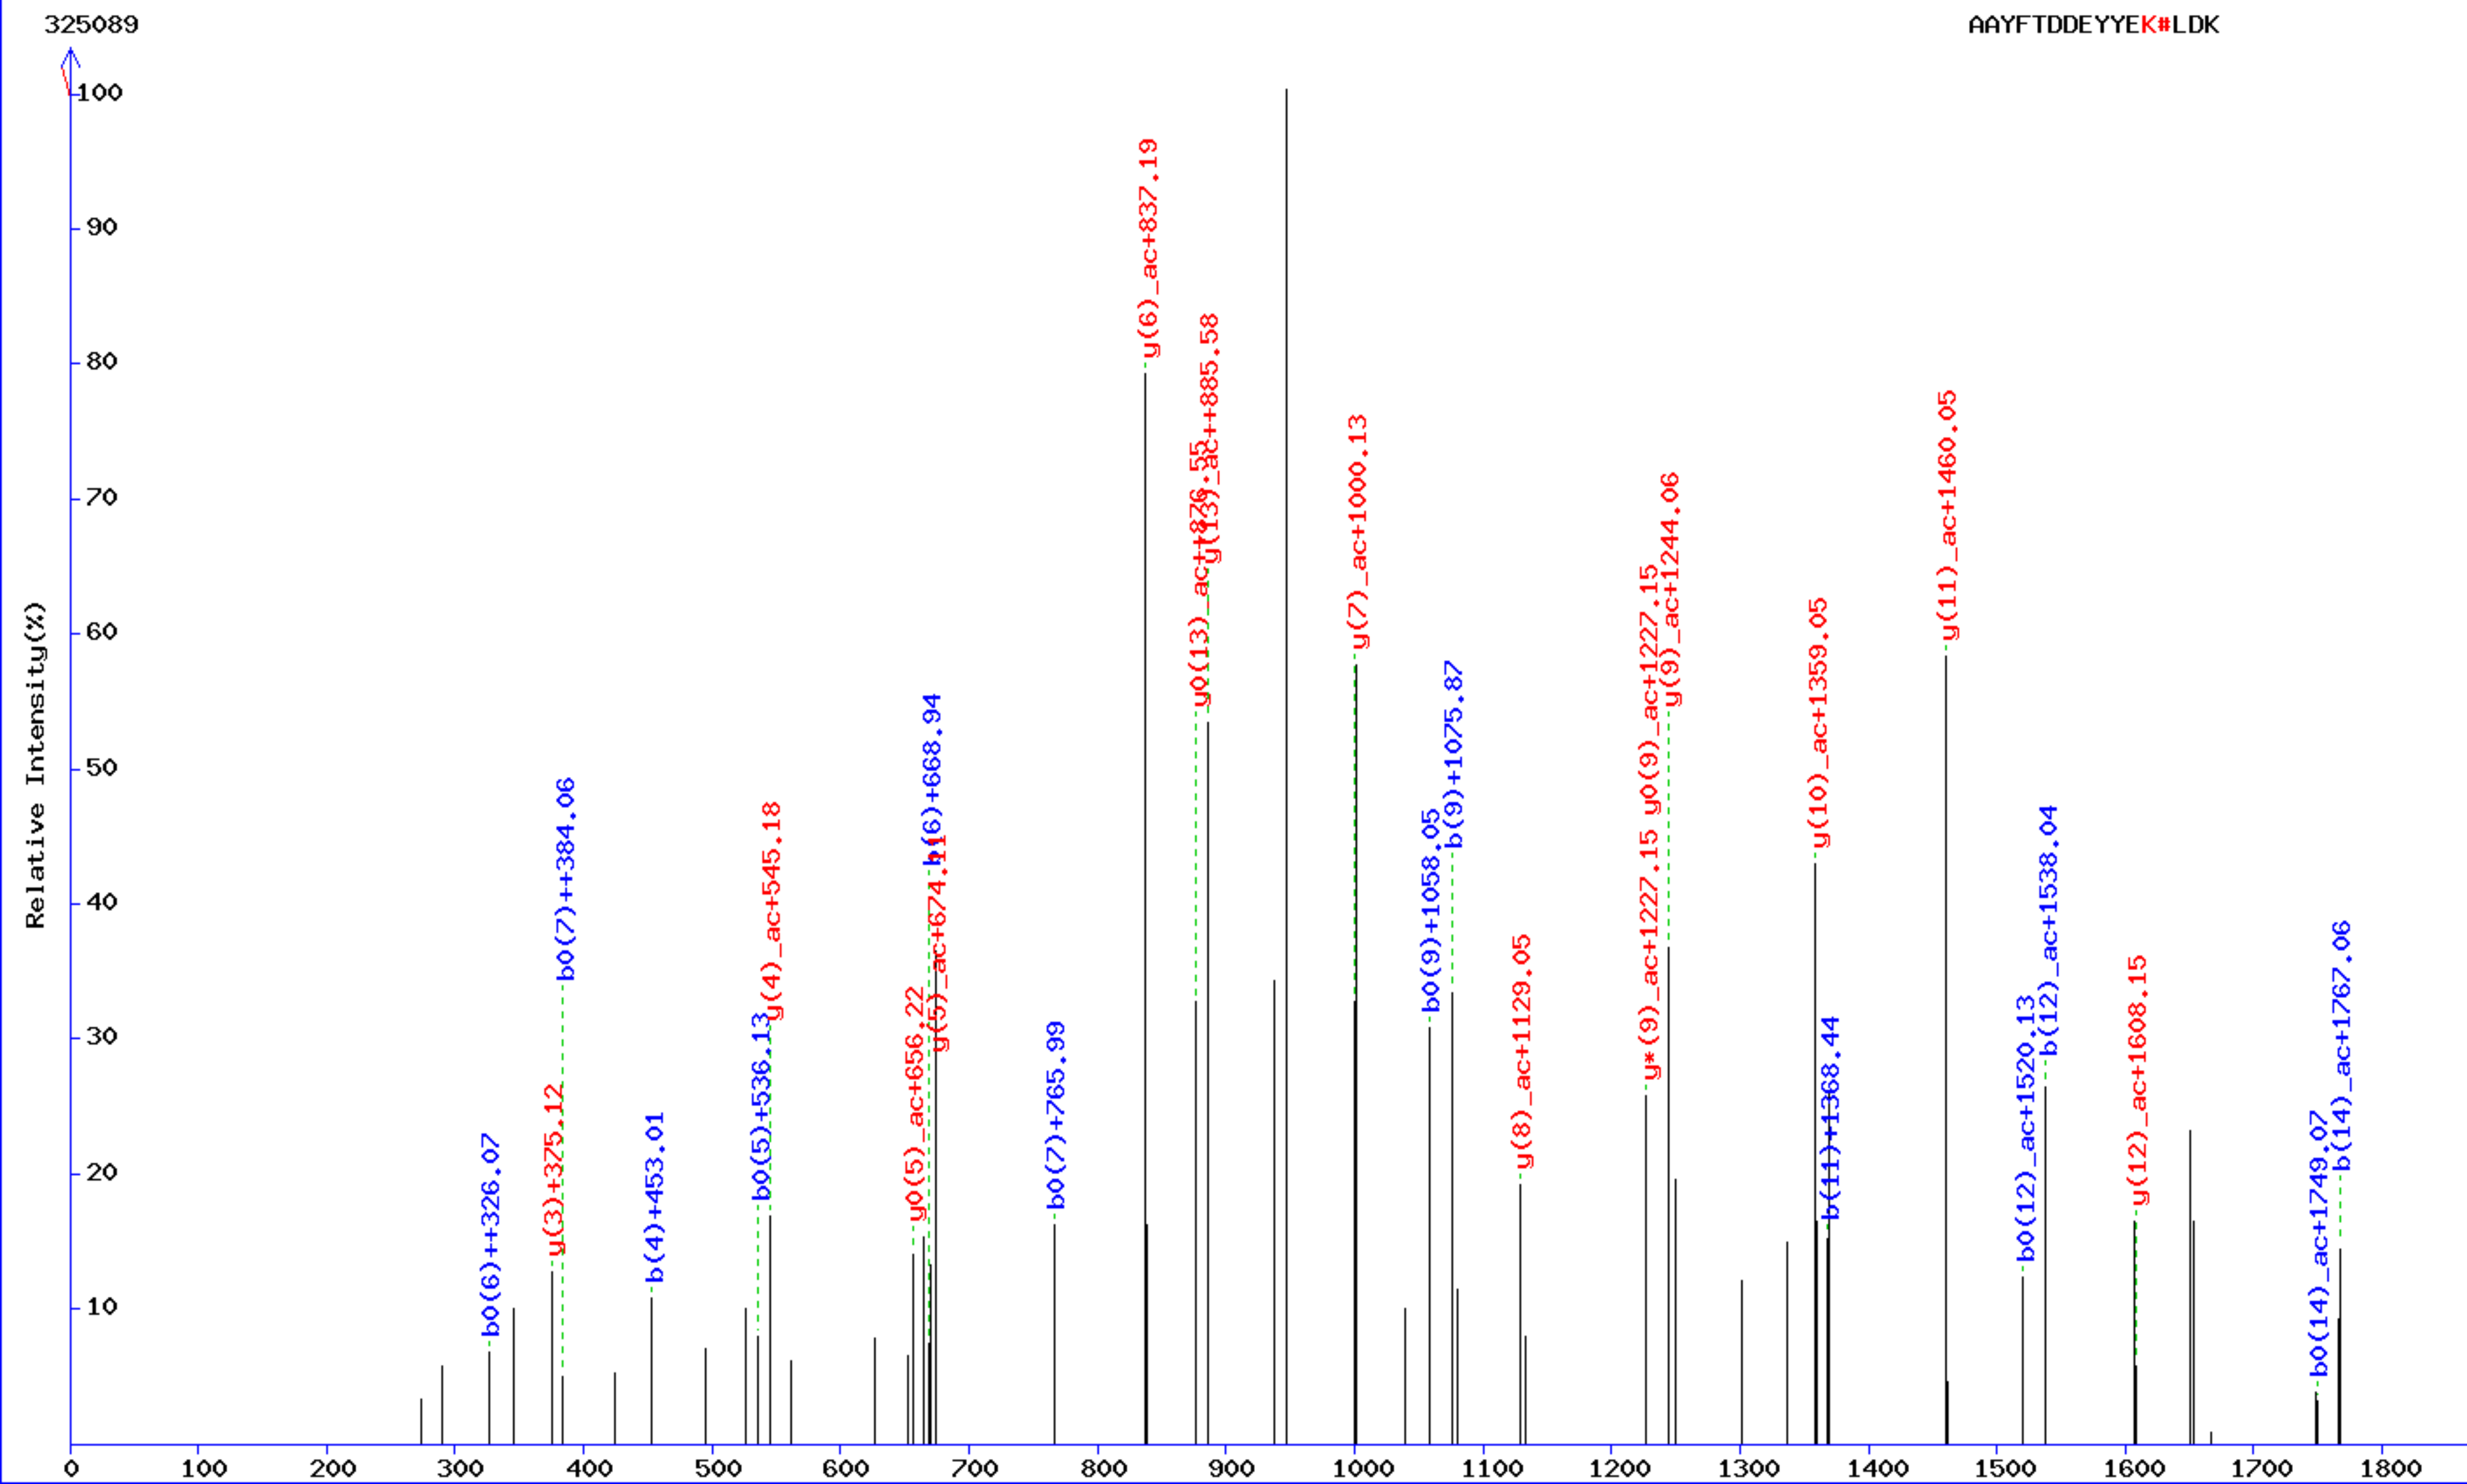

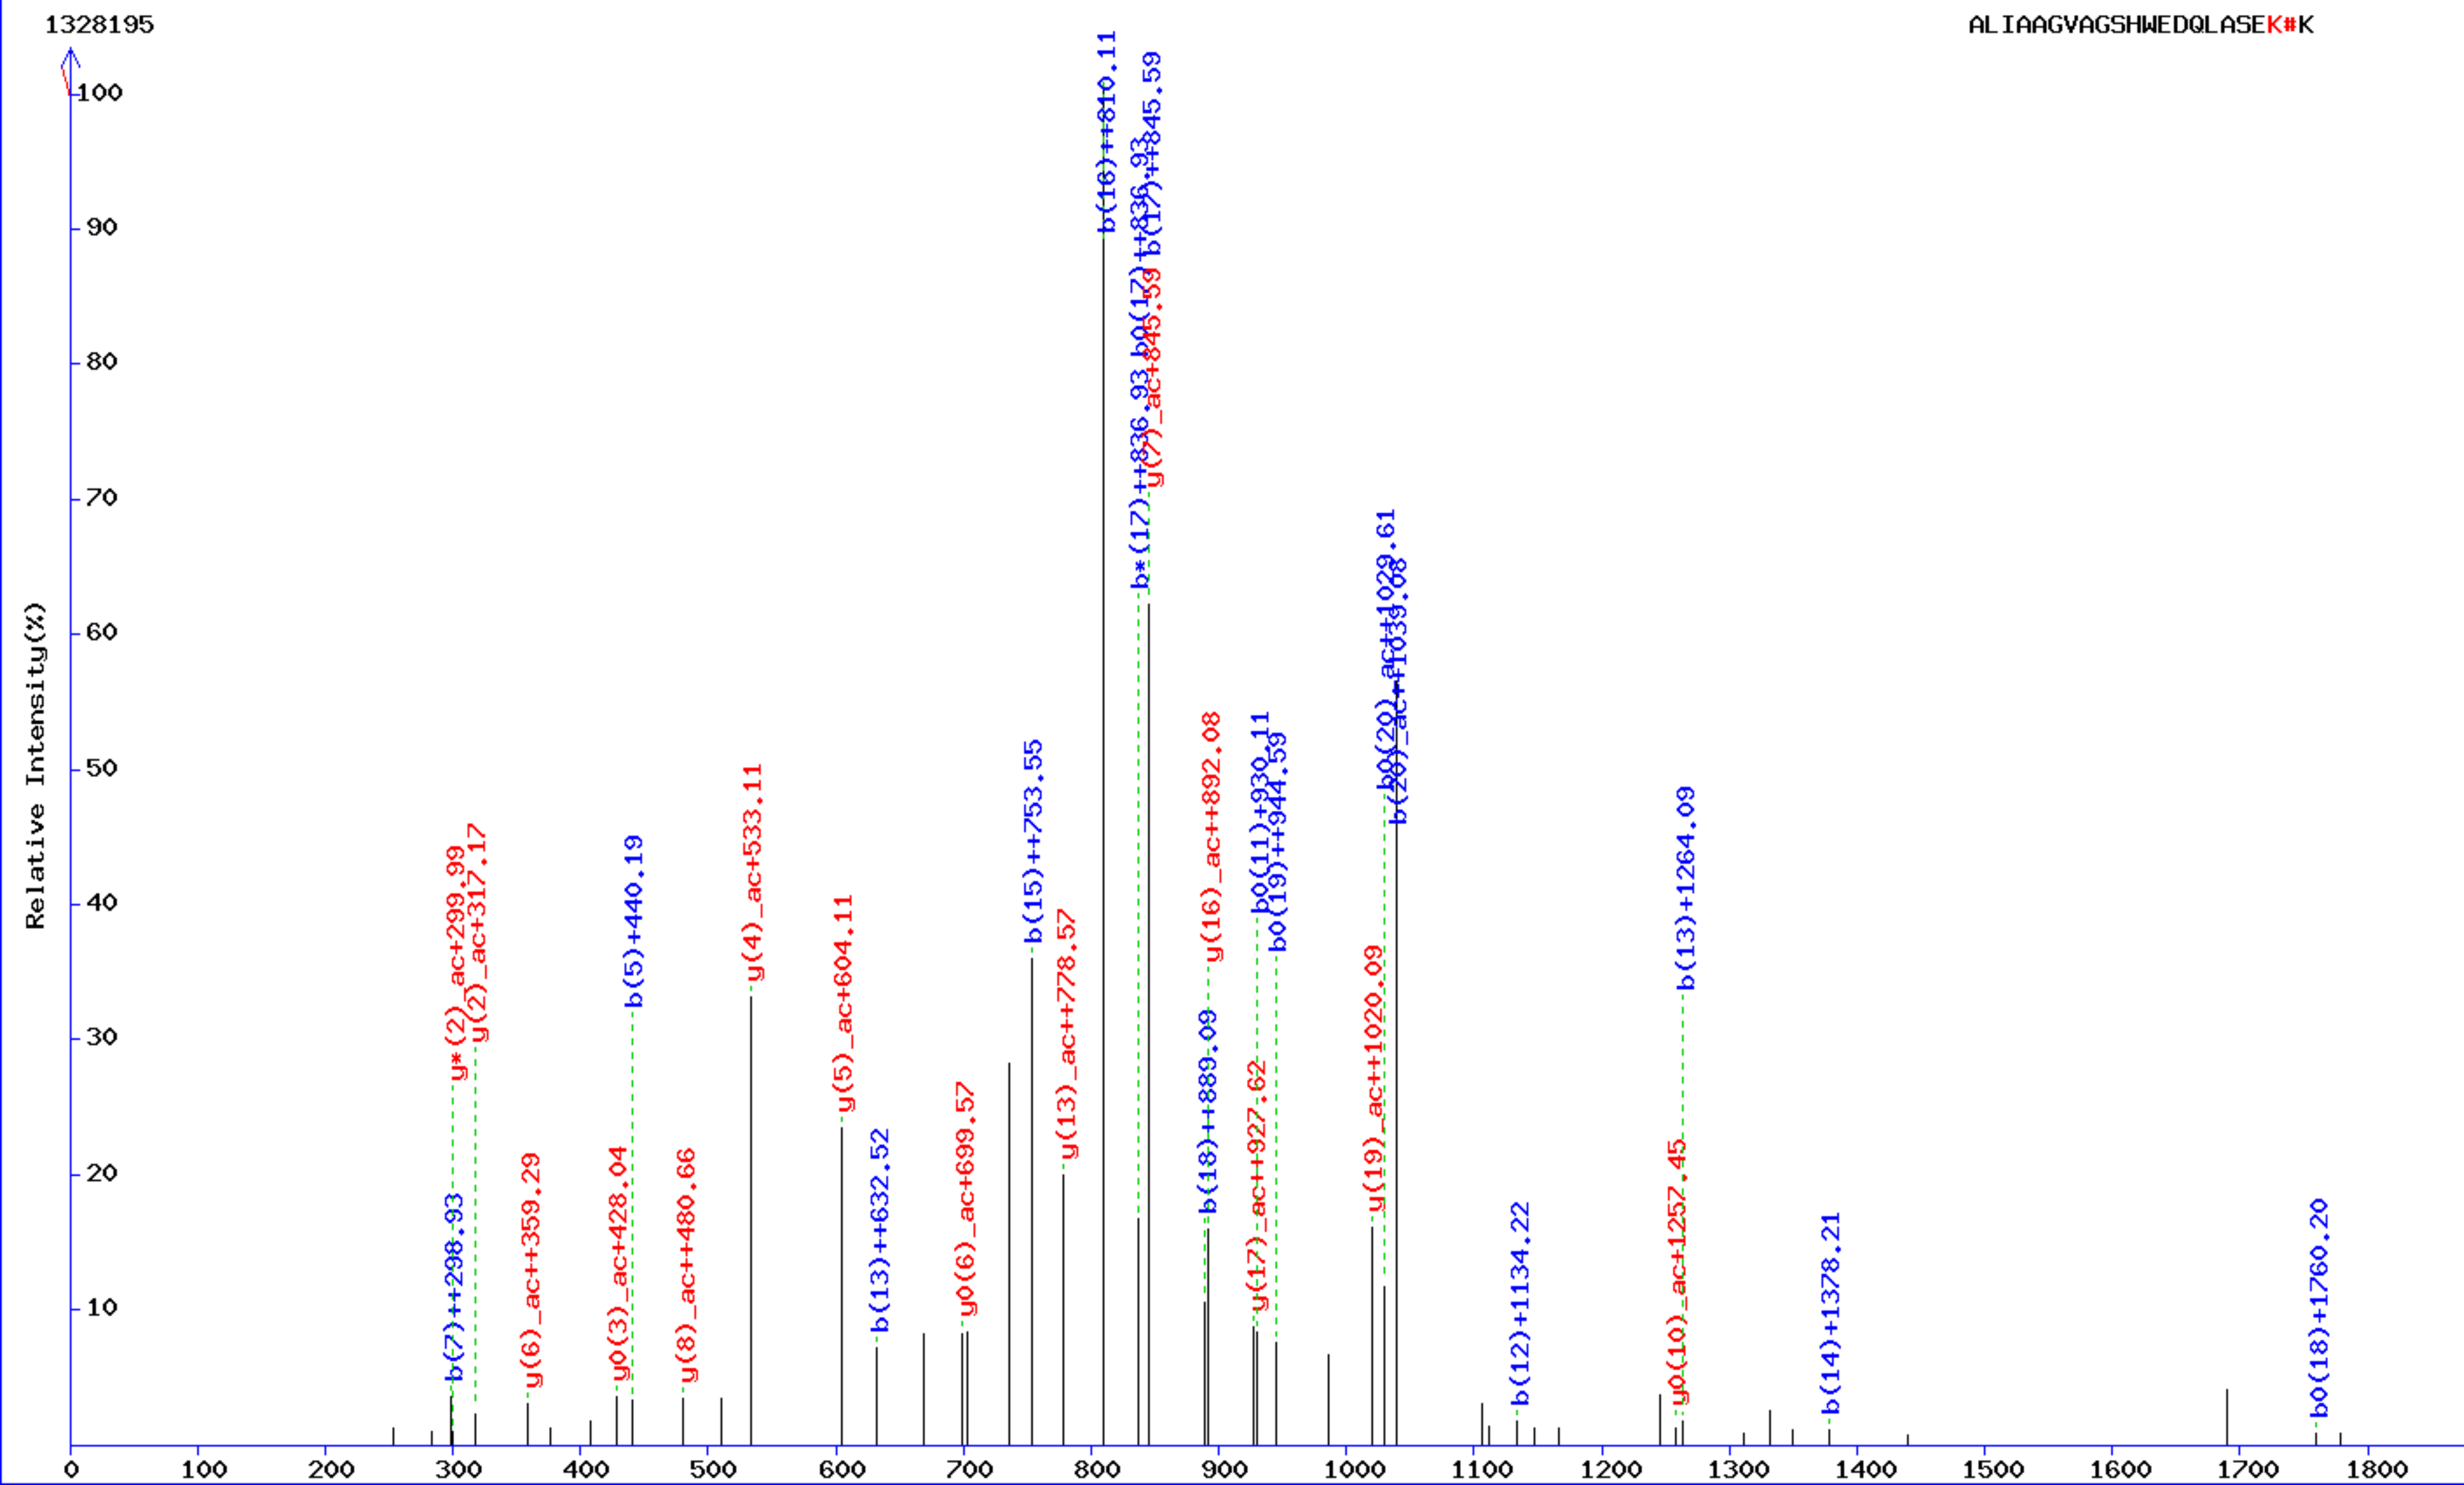

# gi|148660116 MRA\_0359 molecular chaperone DnaK

VPEDTLNK#VDAVAEAK

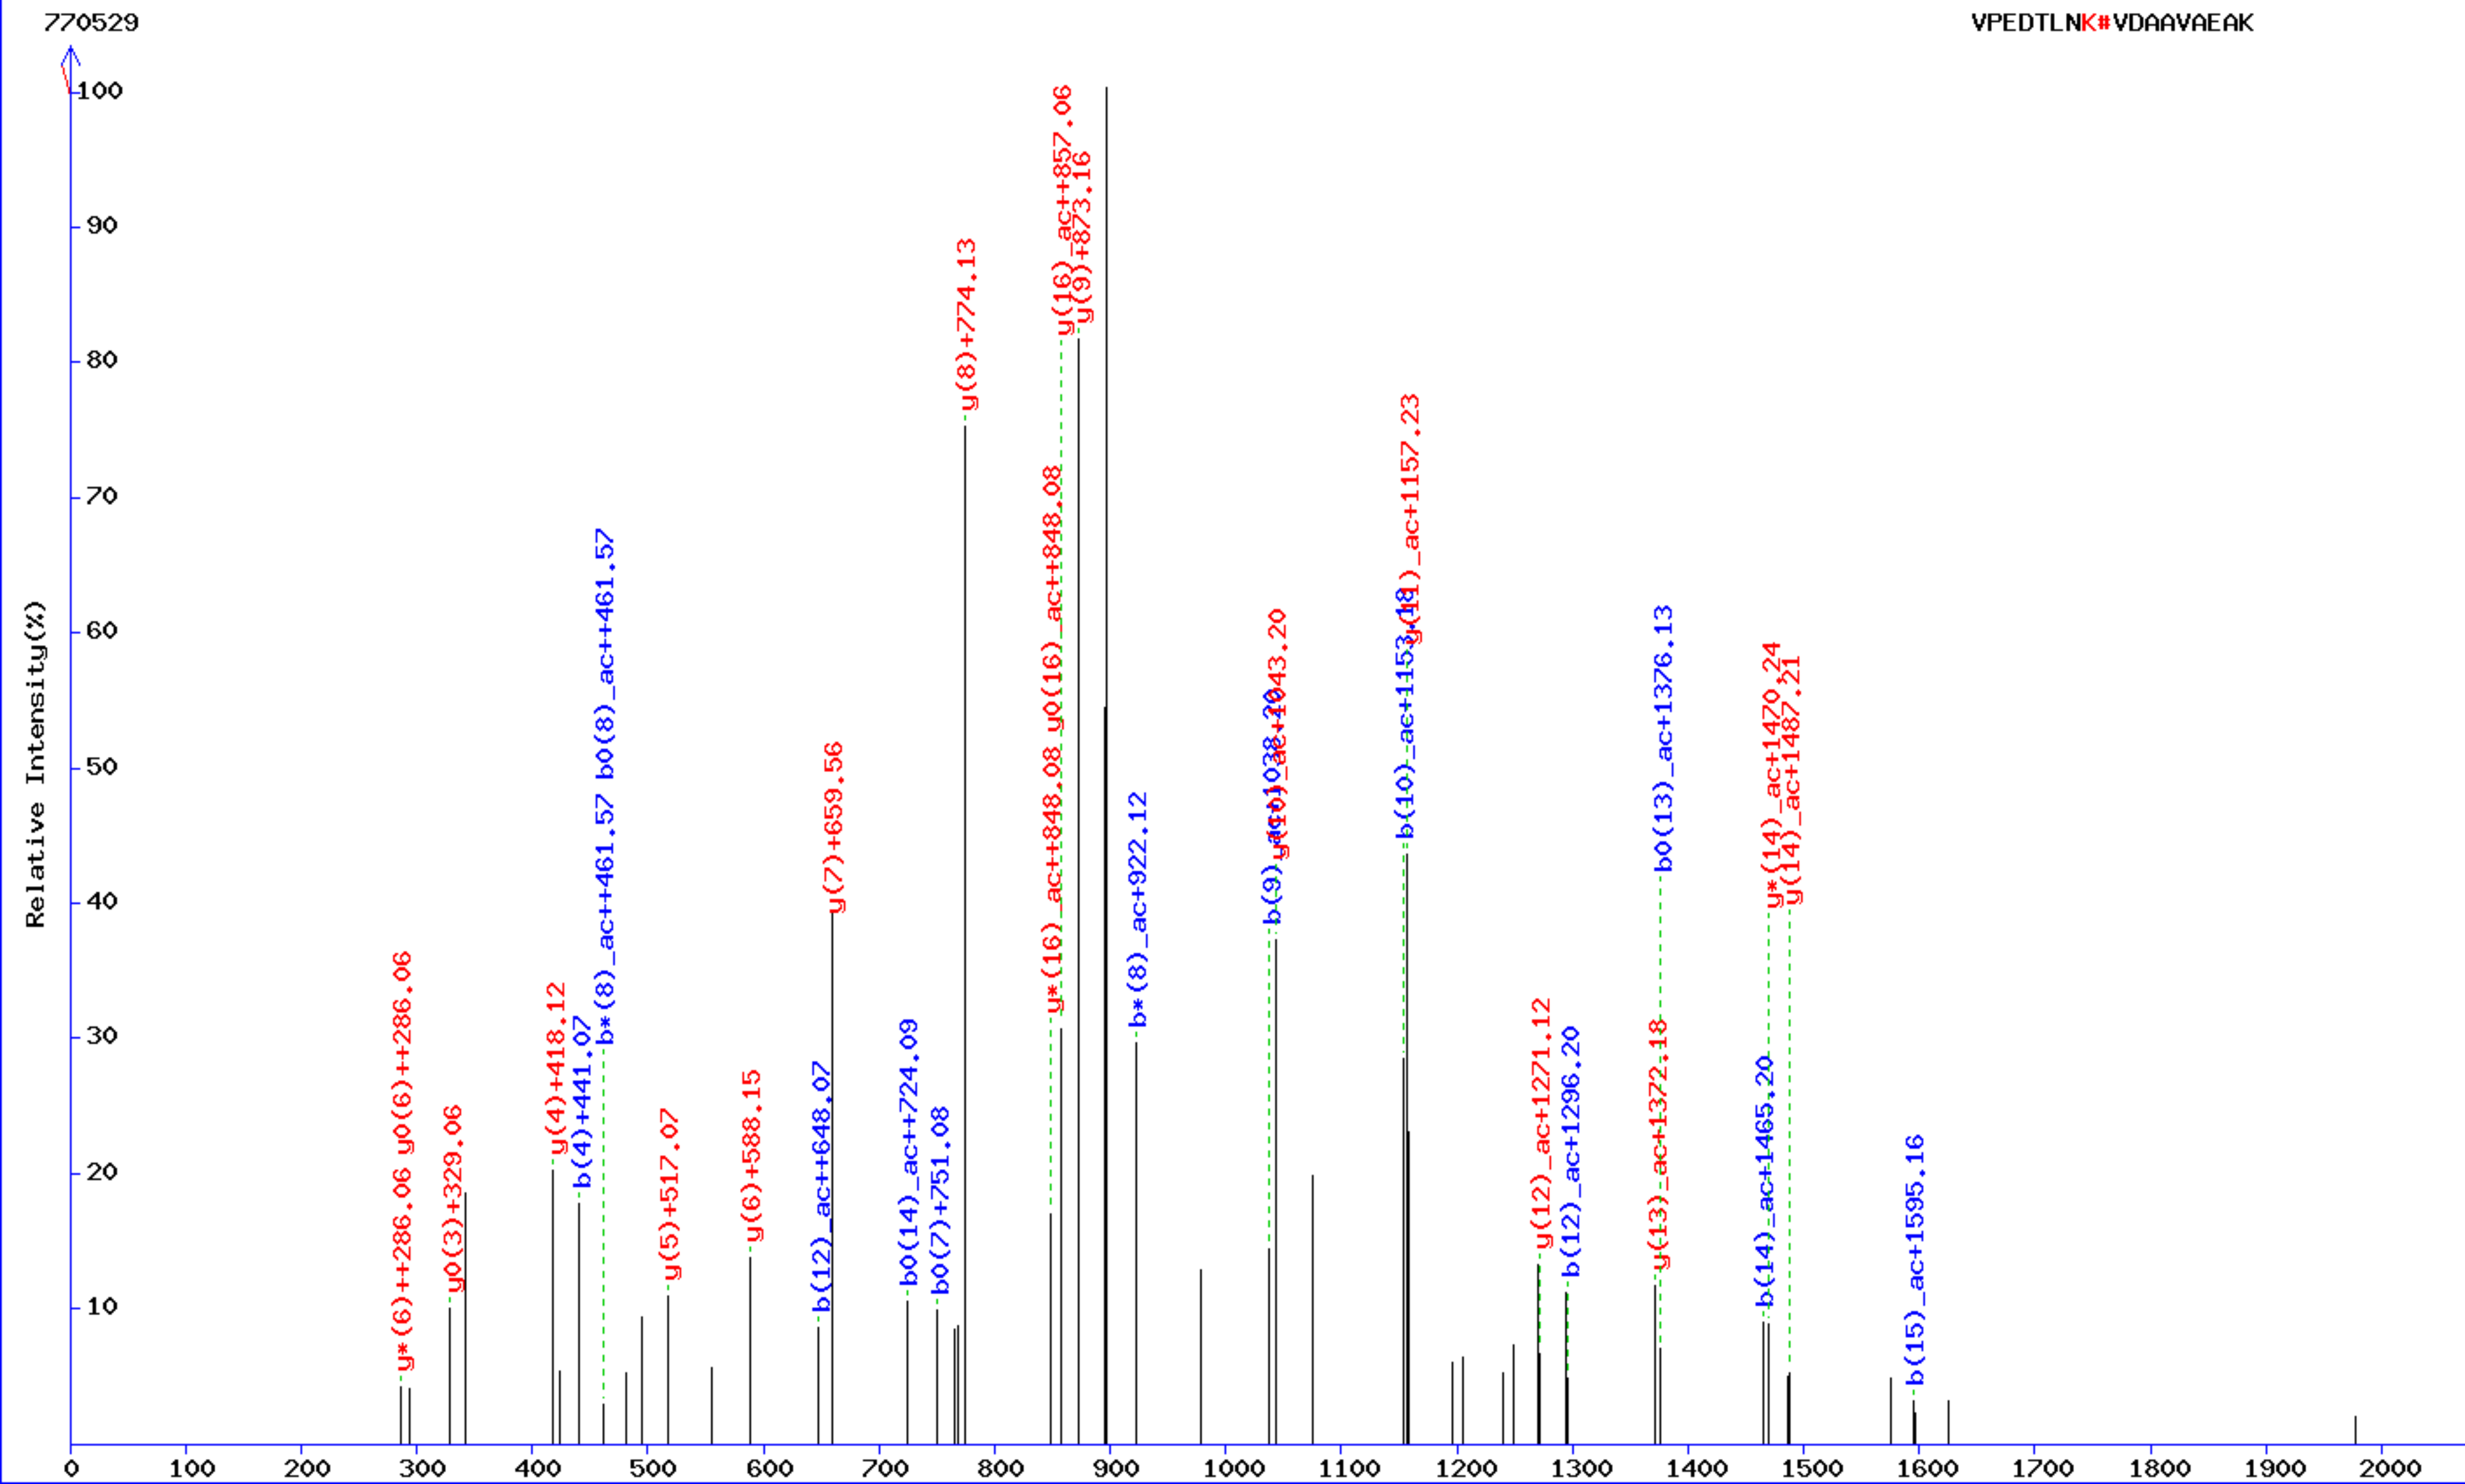

# gi|148659826 MRA\_0068 isocitrate dehydrogenase (NADP) Icd2

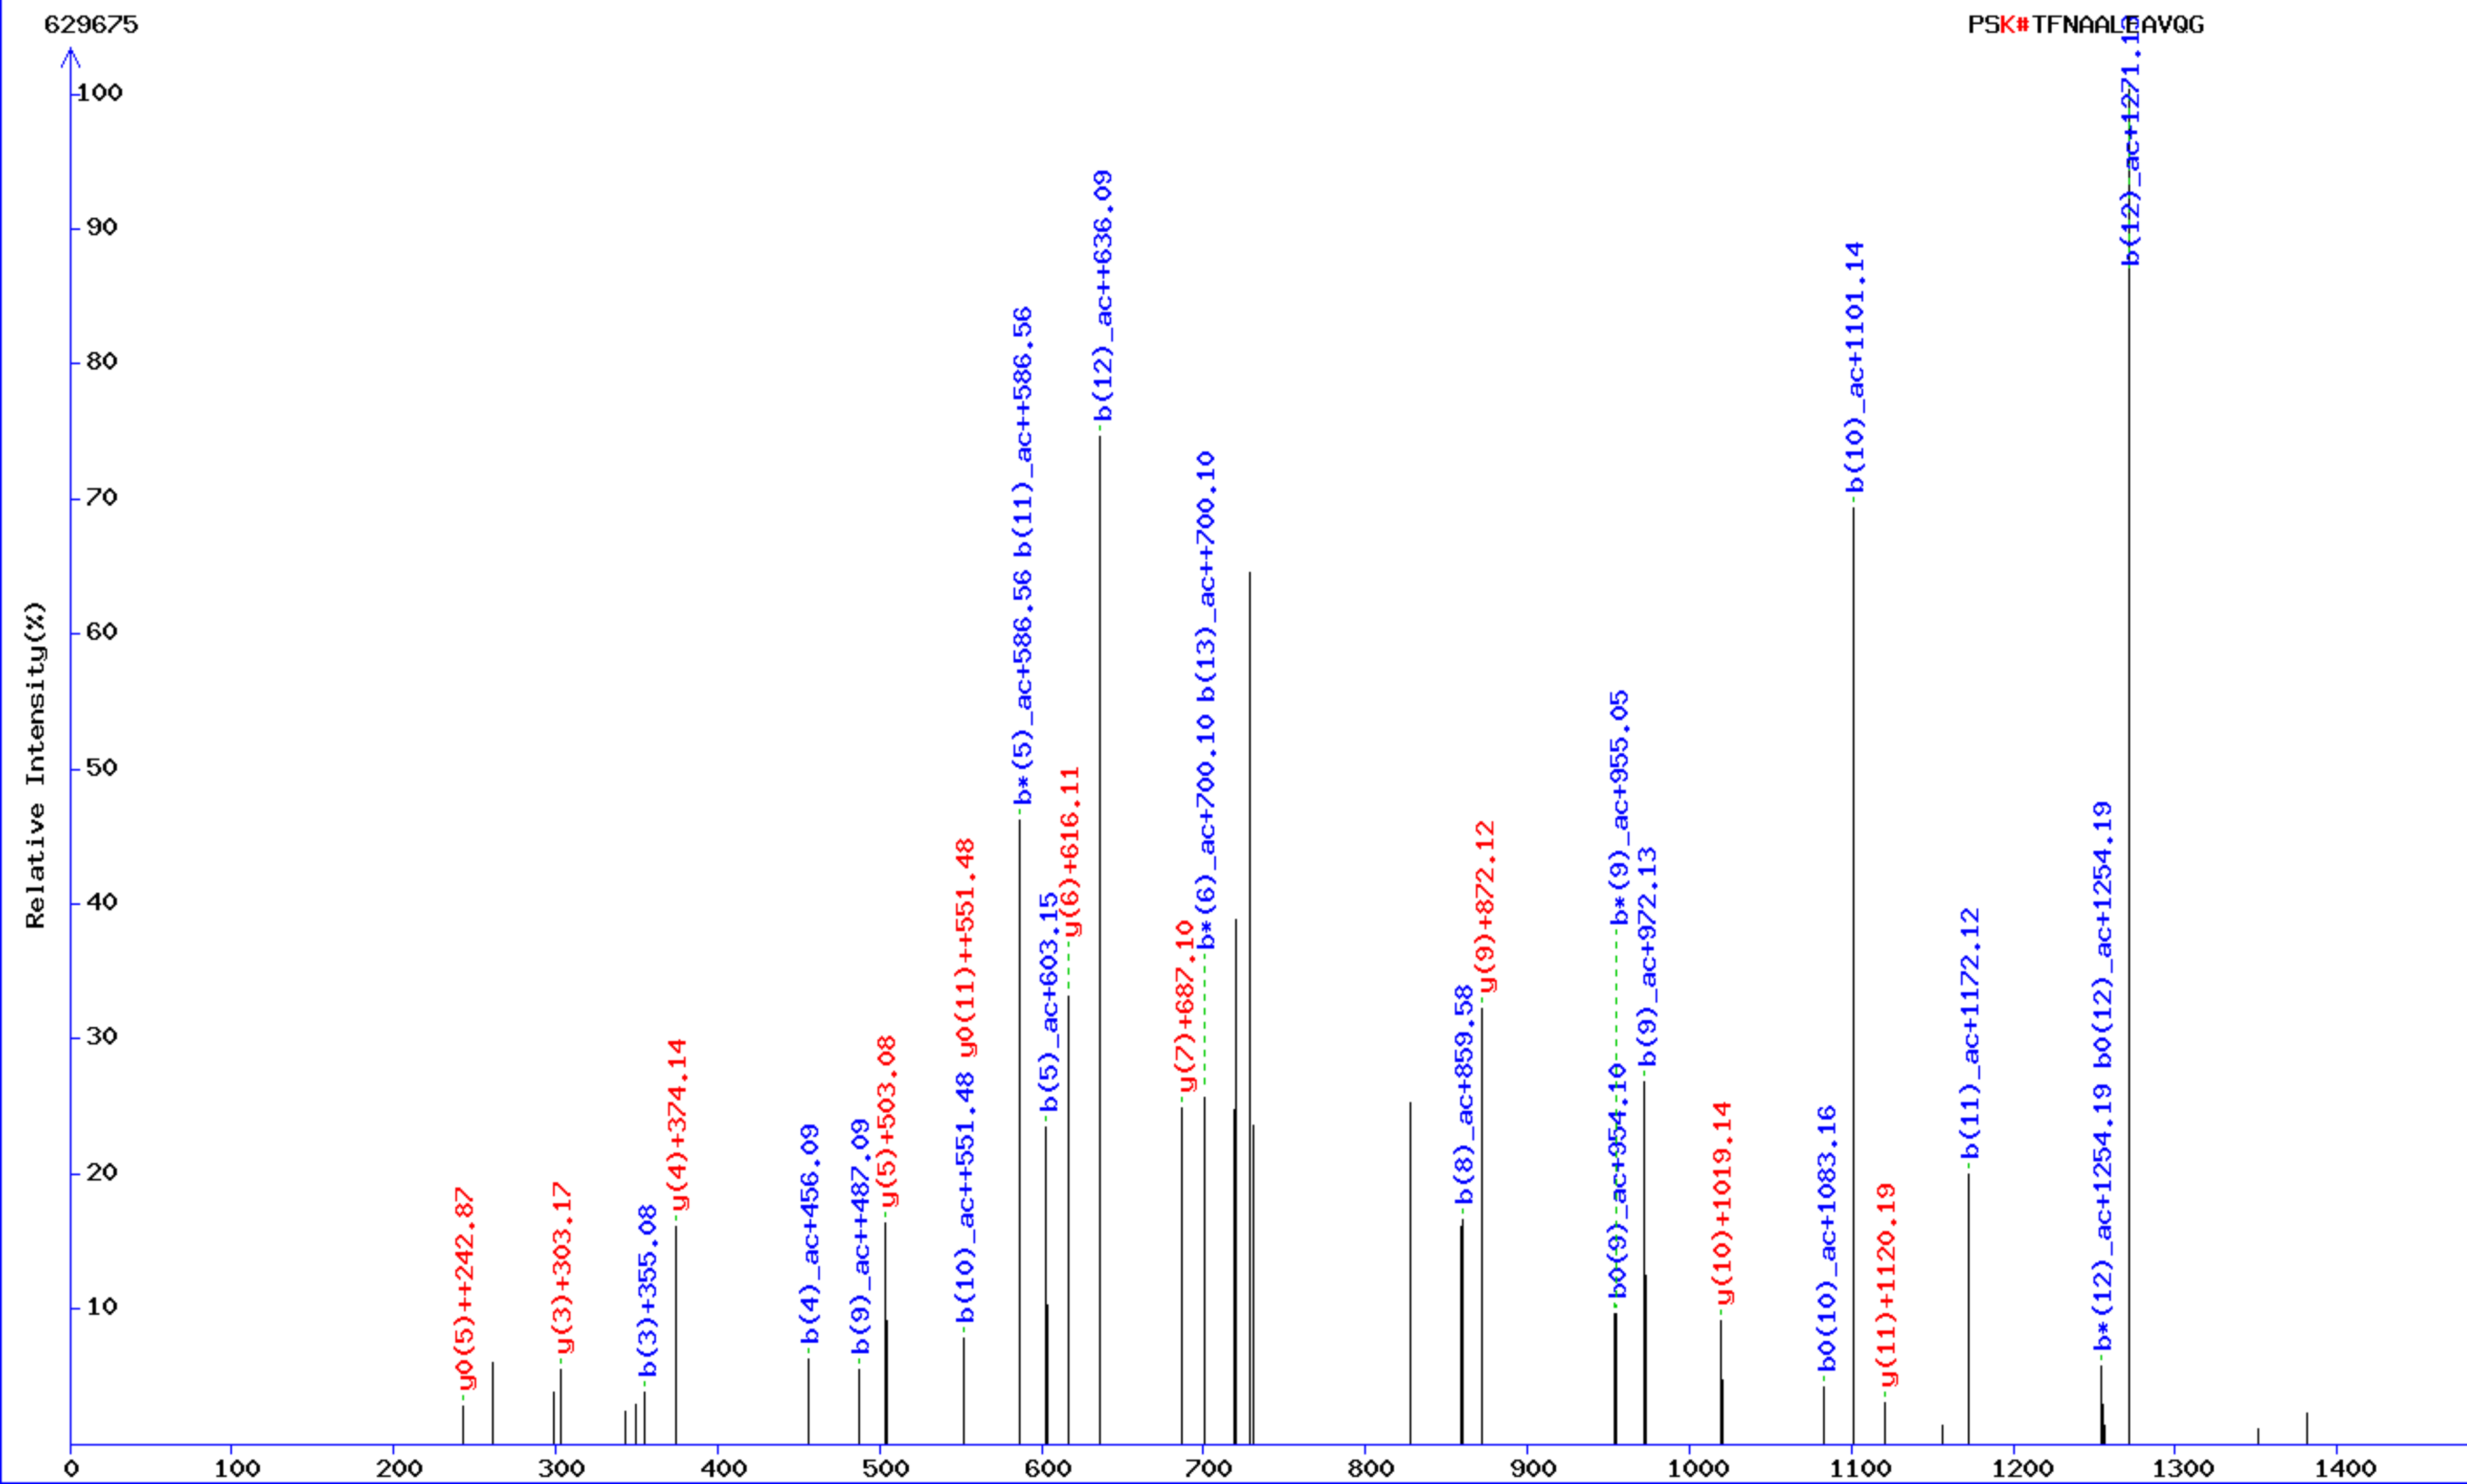

# gi|148662842 MRA\_3021 glutamyl-tRNA synthetase

FFNDDQYVIDPK#AAAK

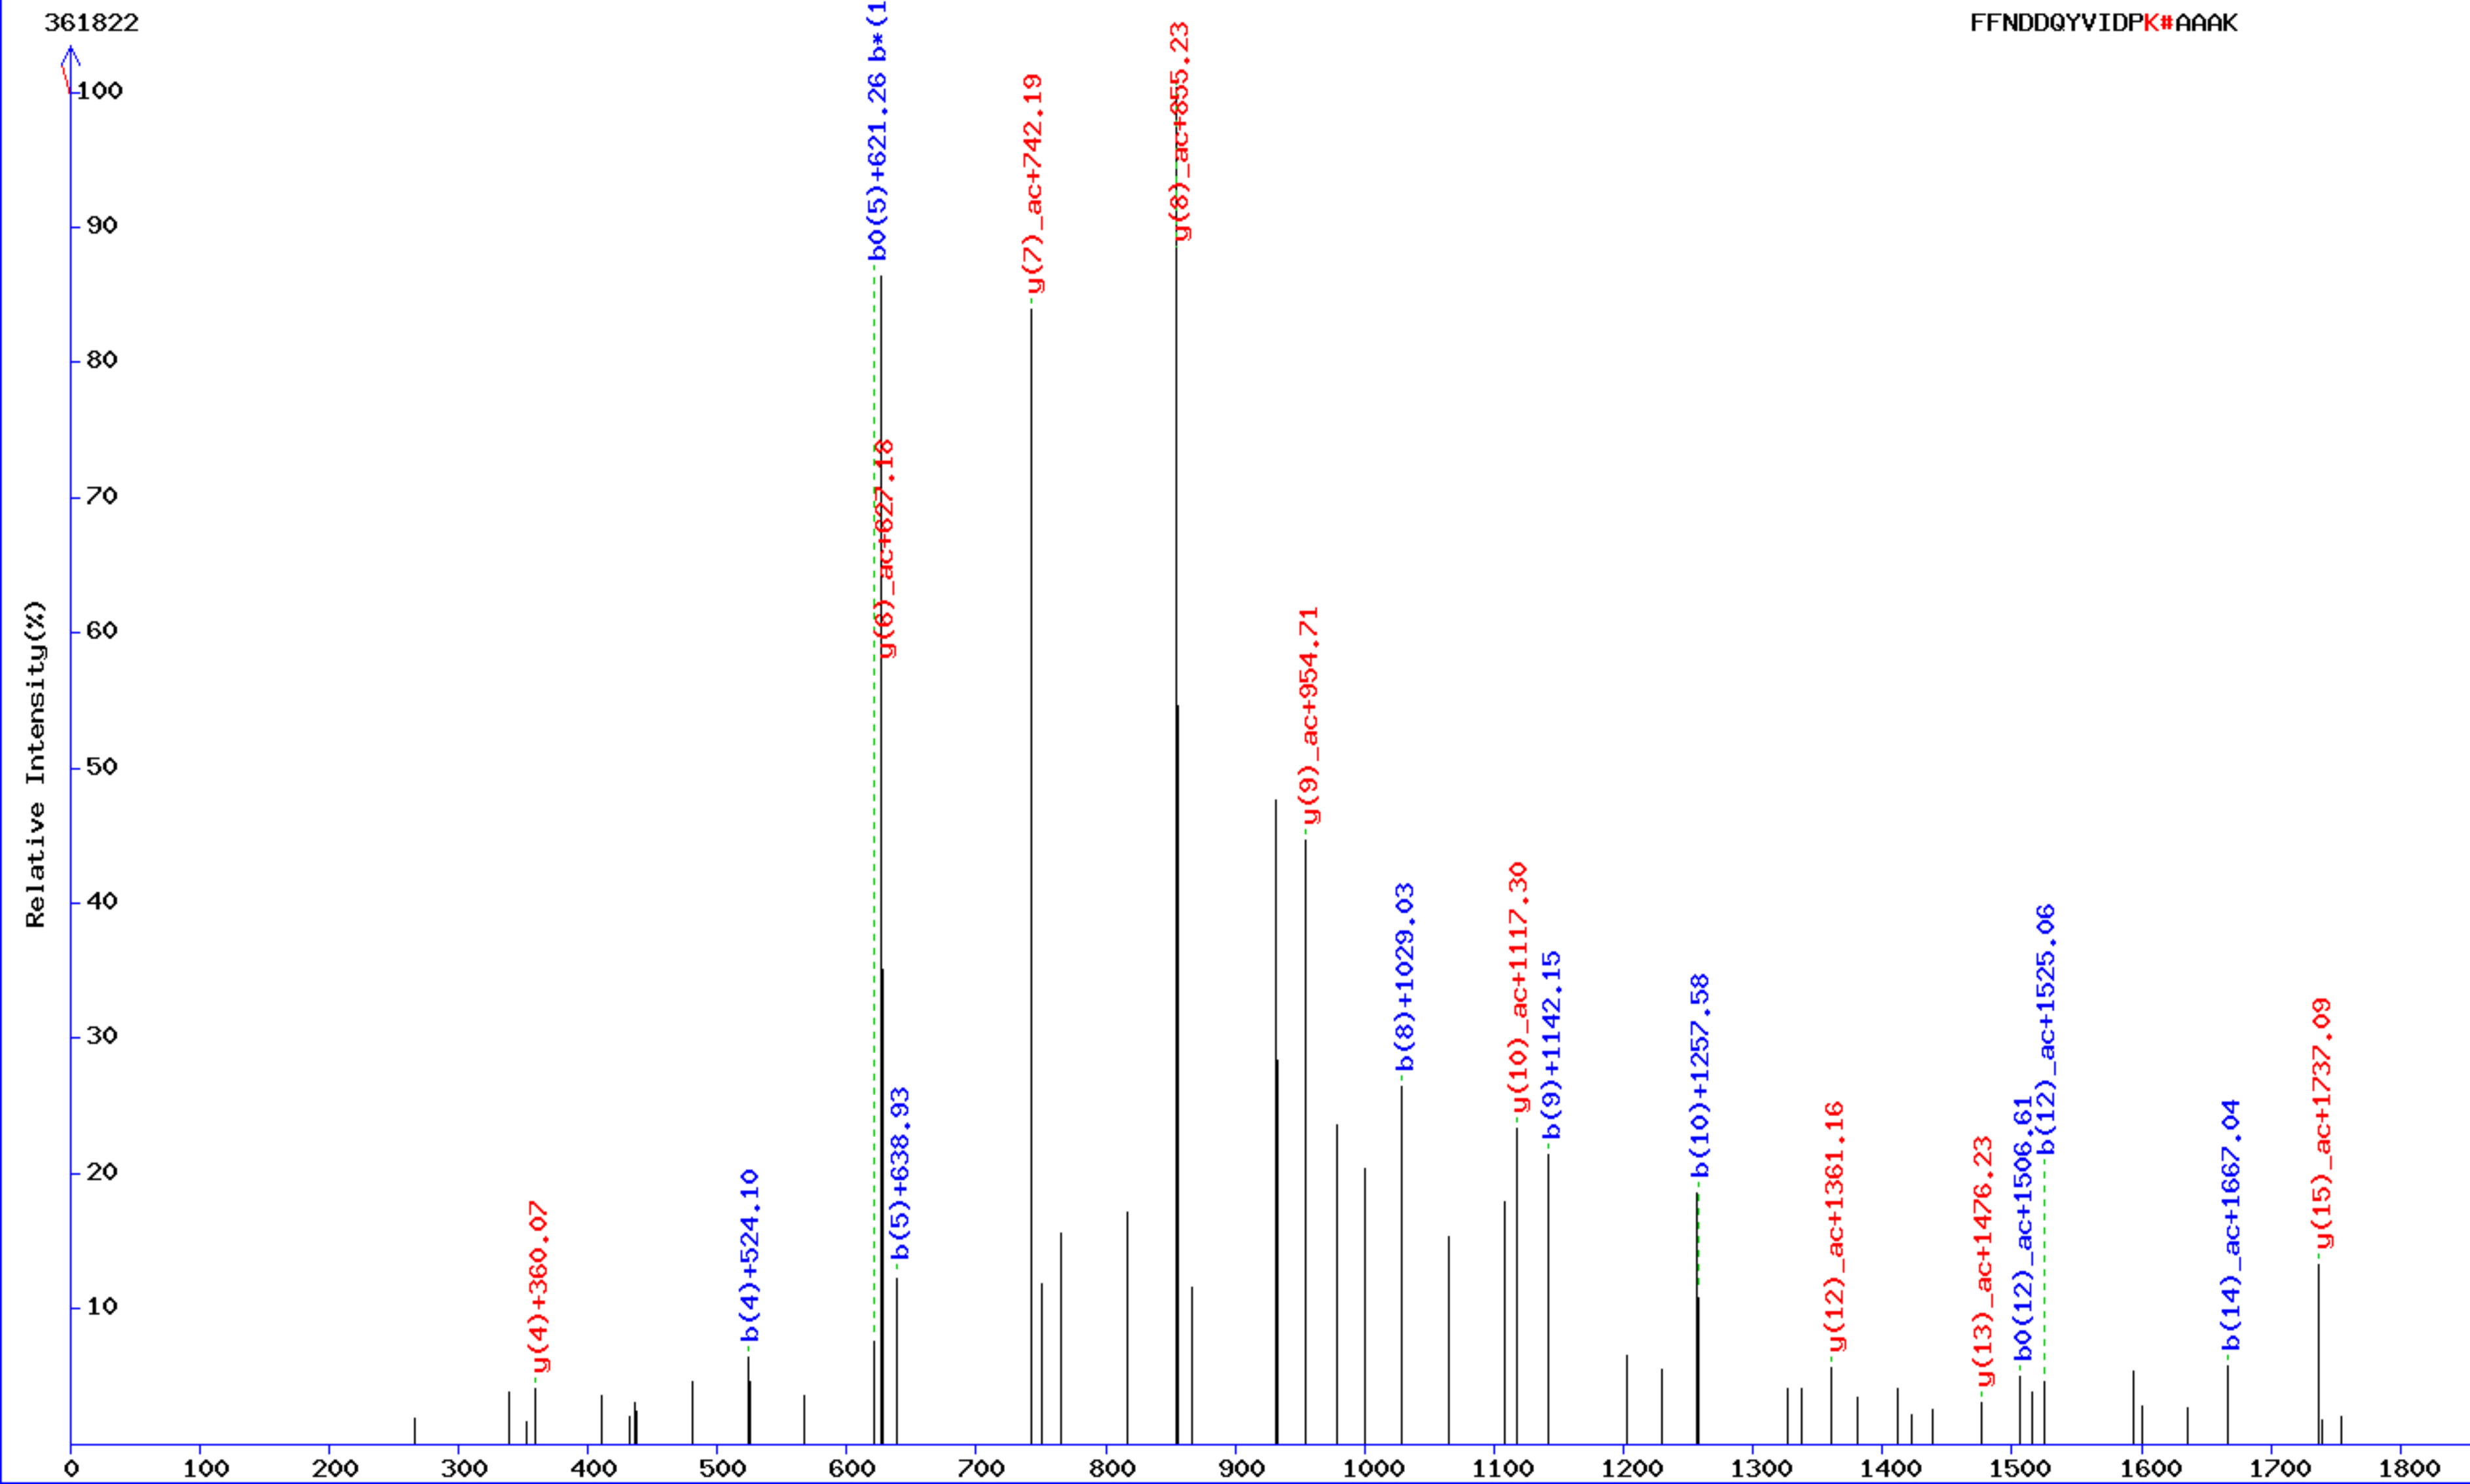

gi|148662726 MRA\_2907 ribosome recycling factor

IDEALFDAEEK#MEK

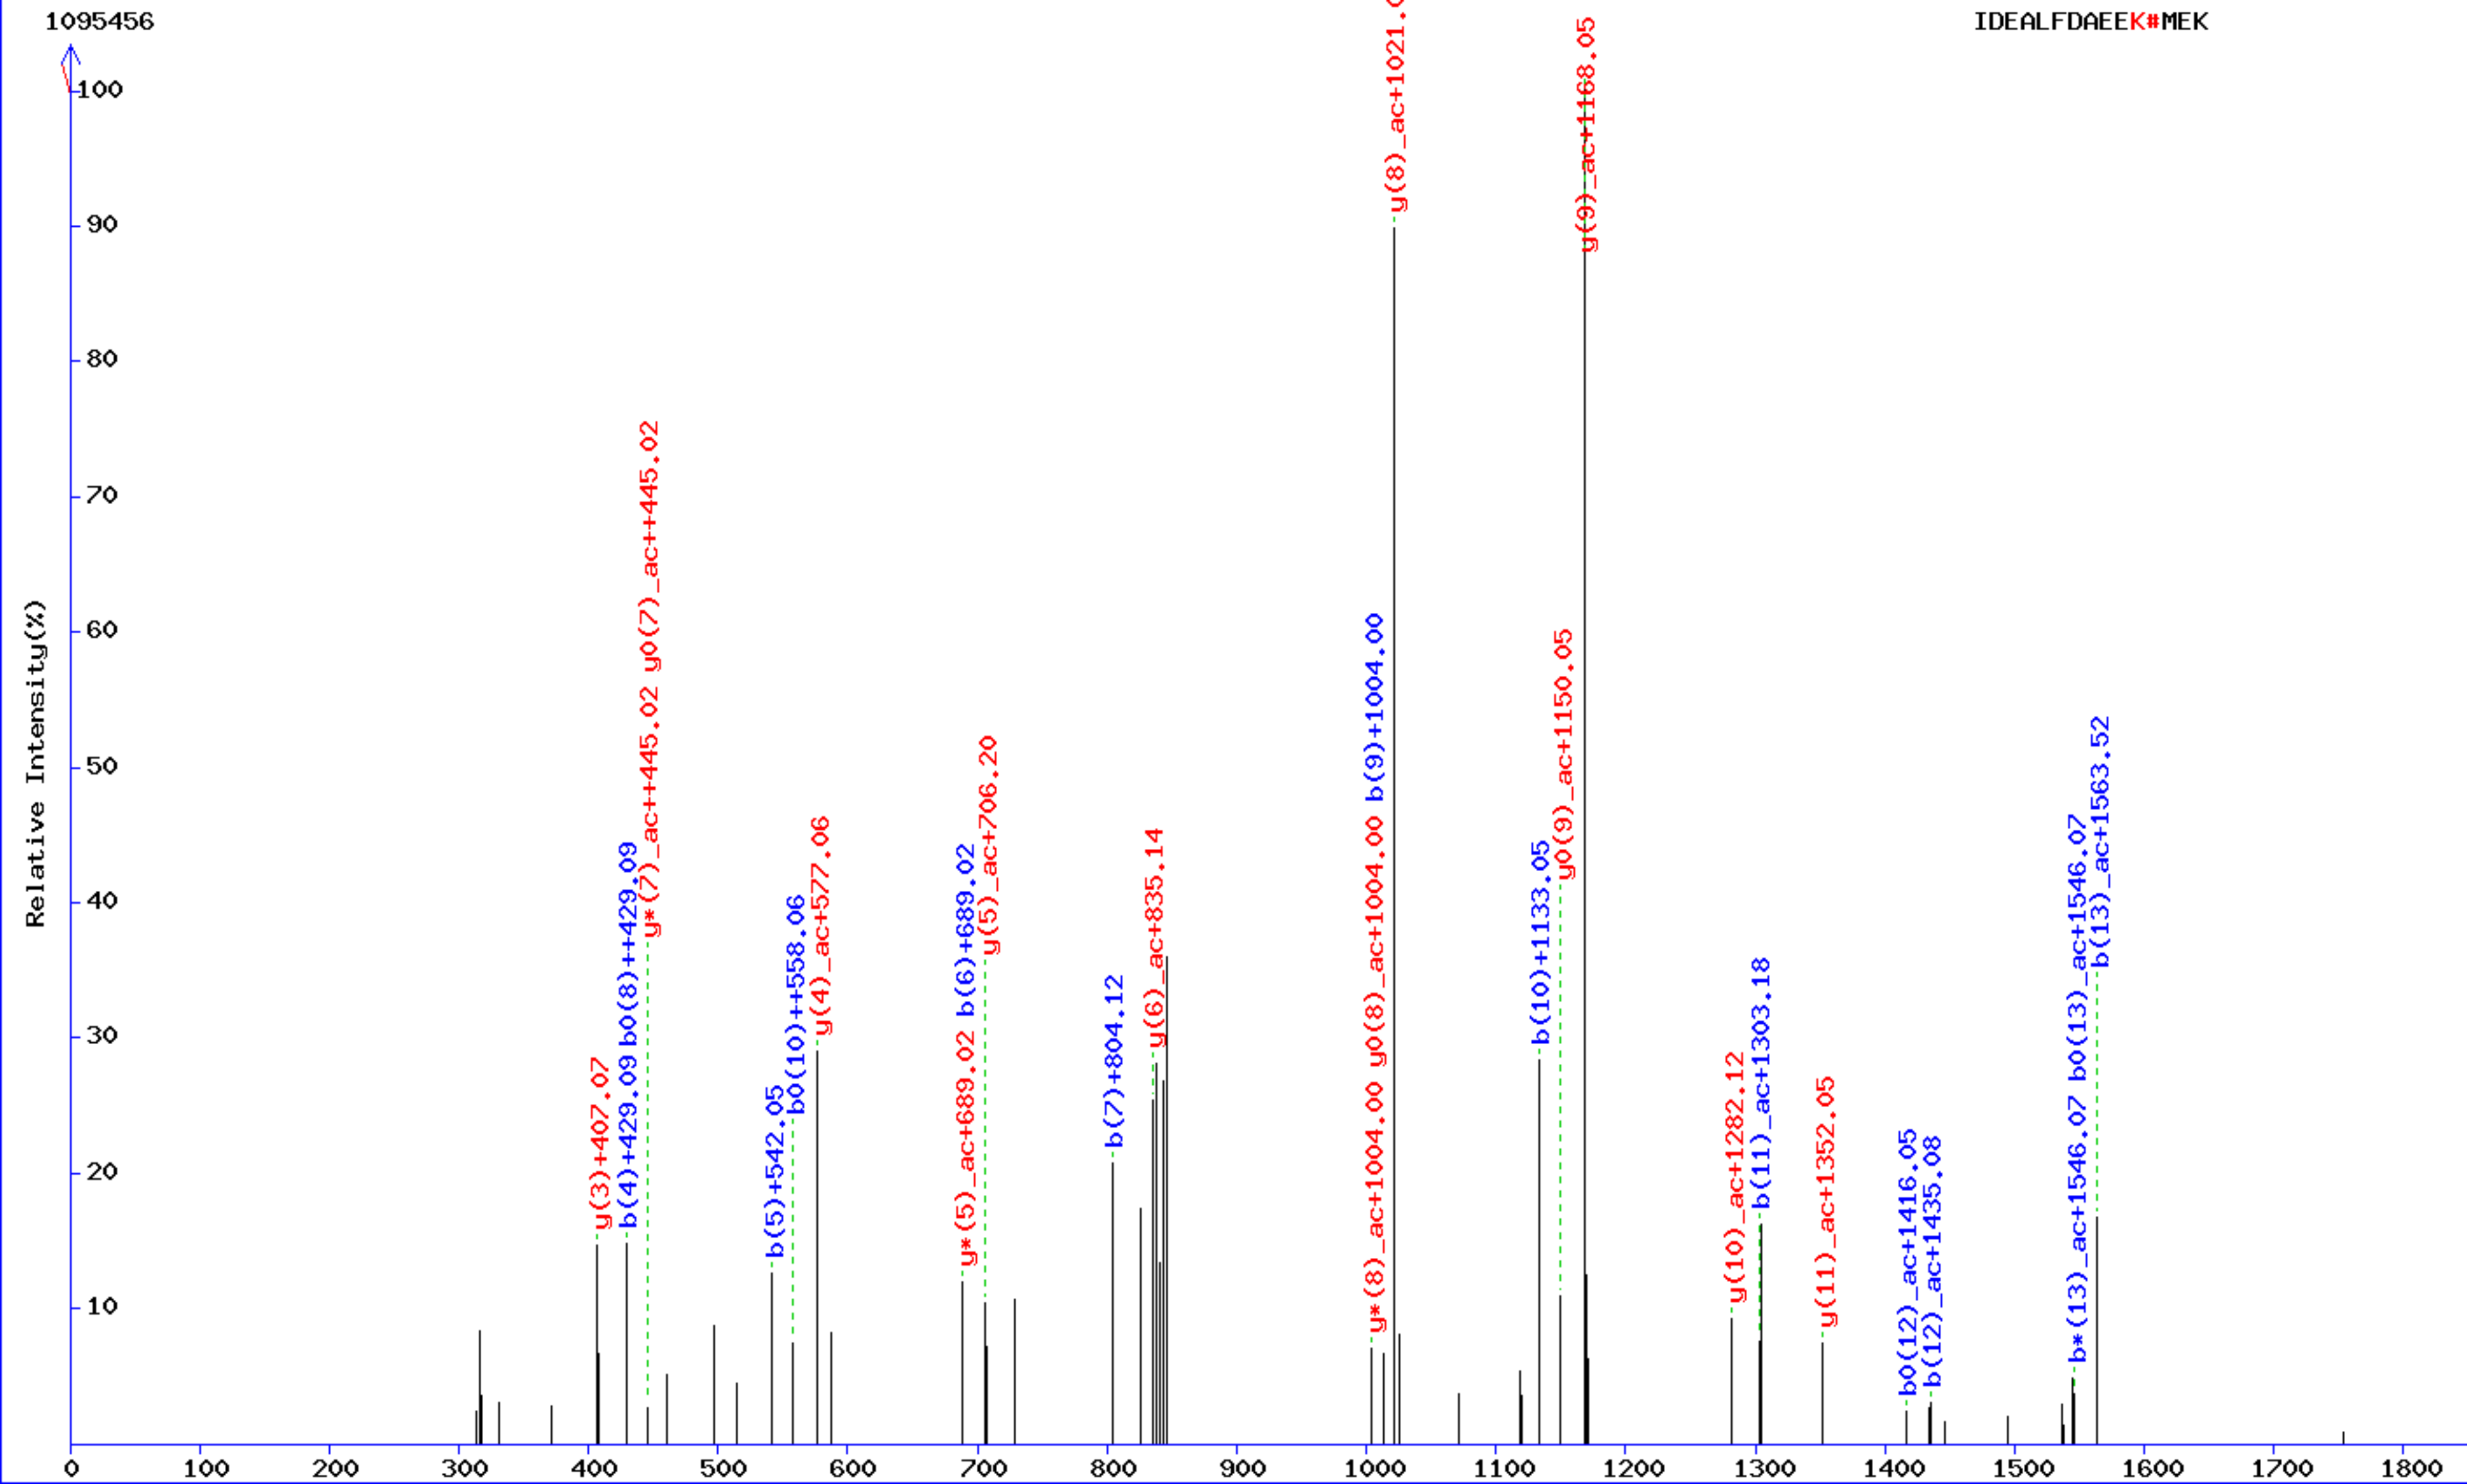



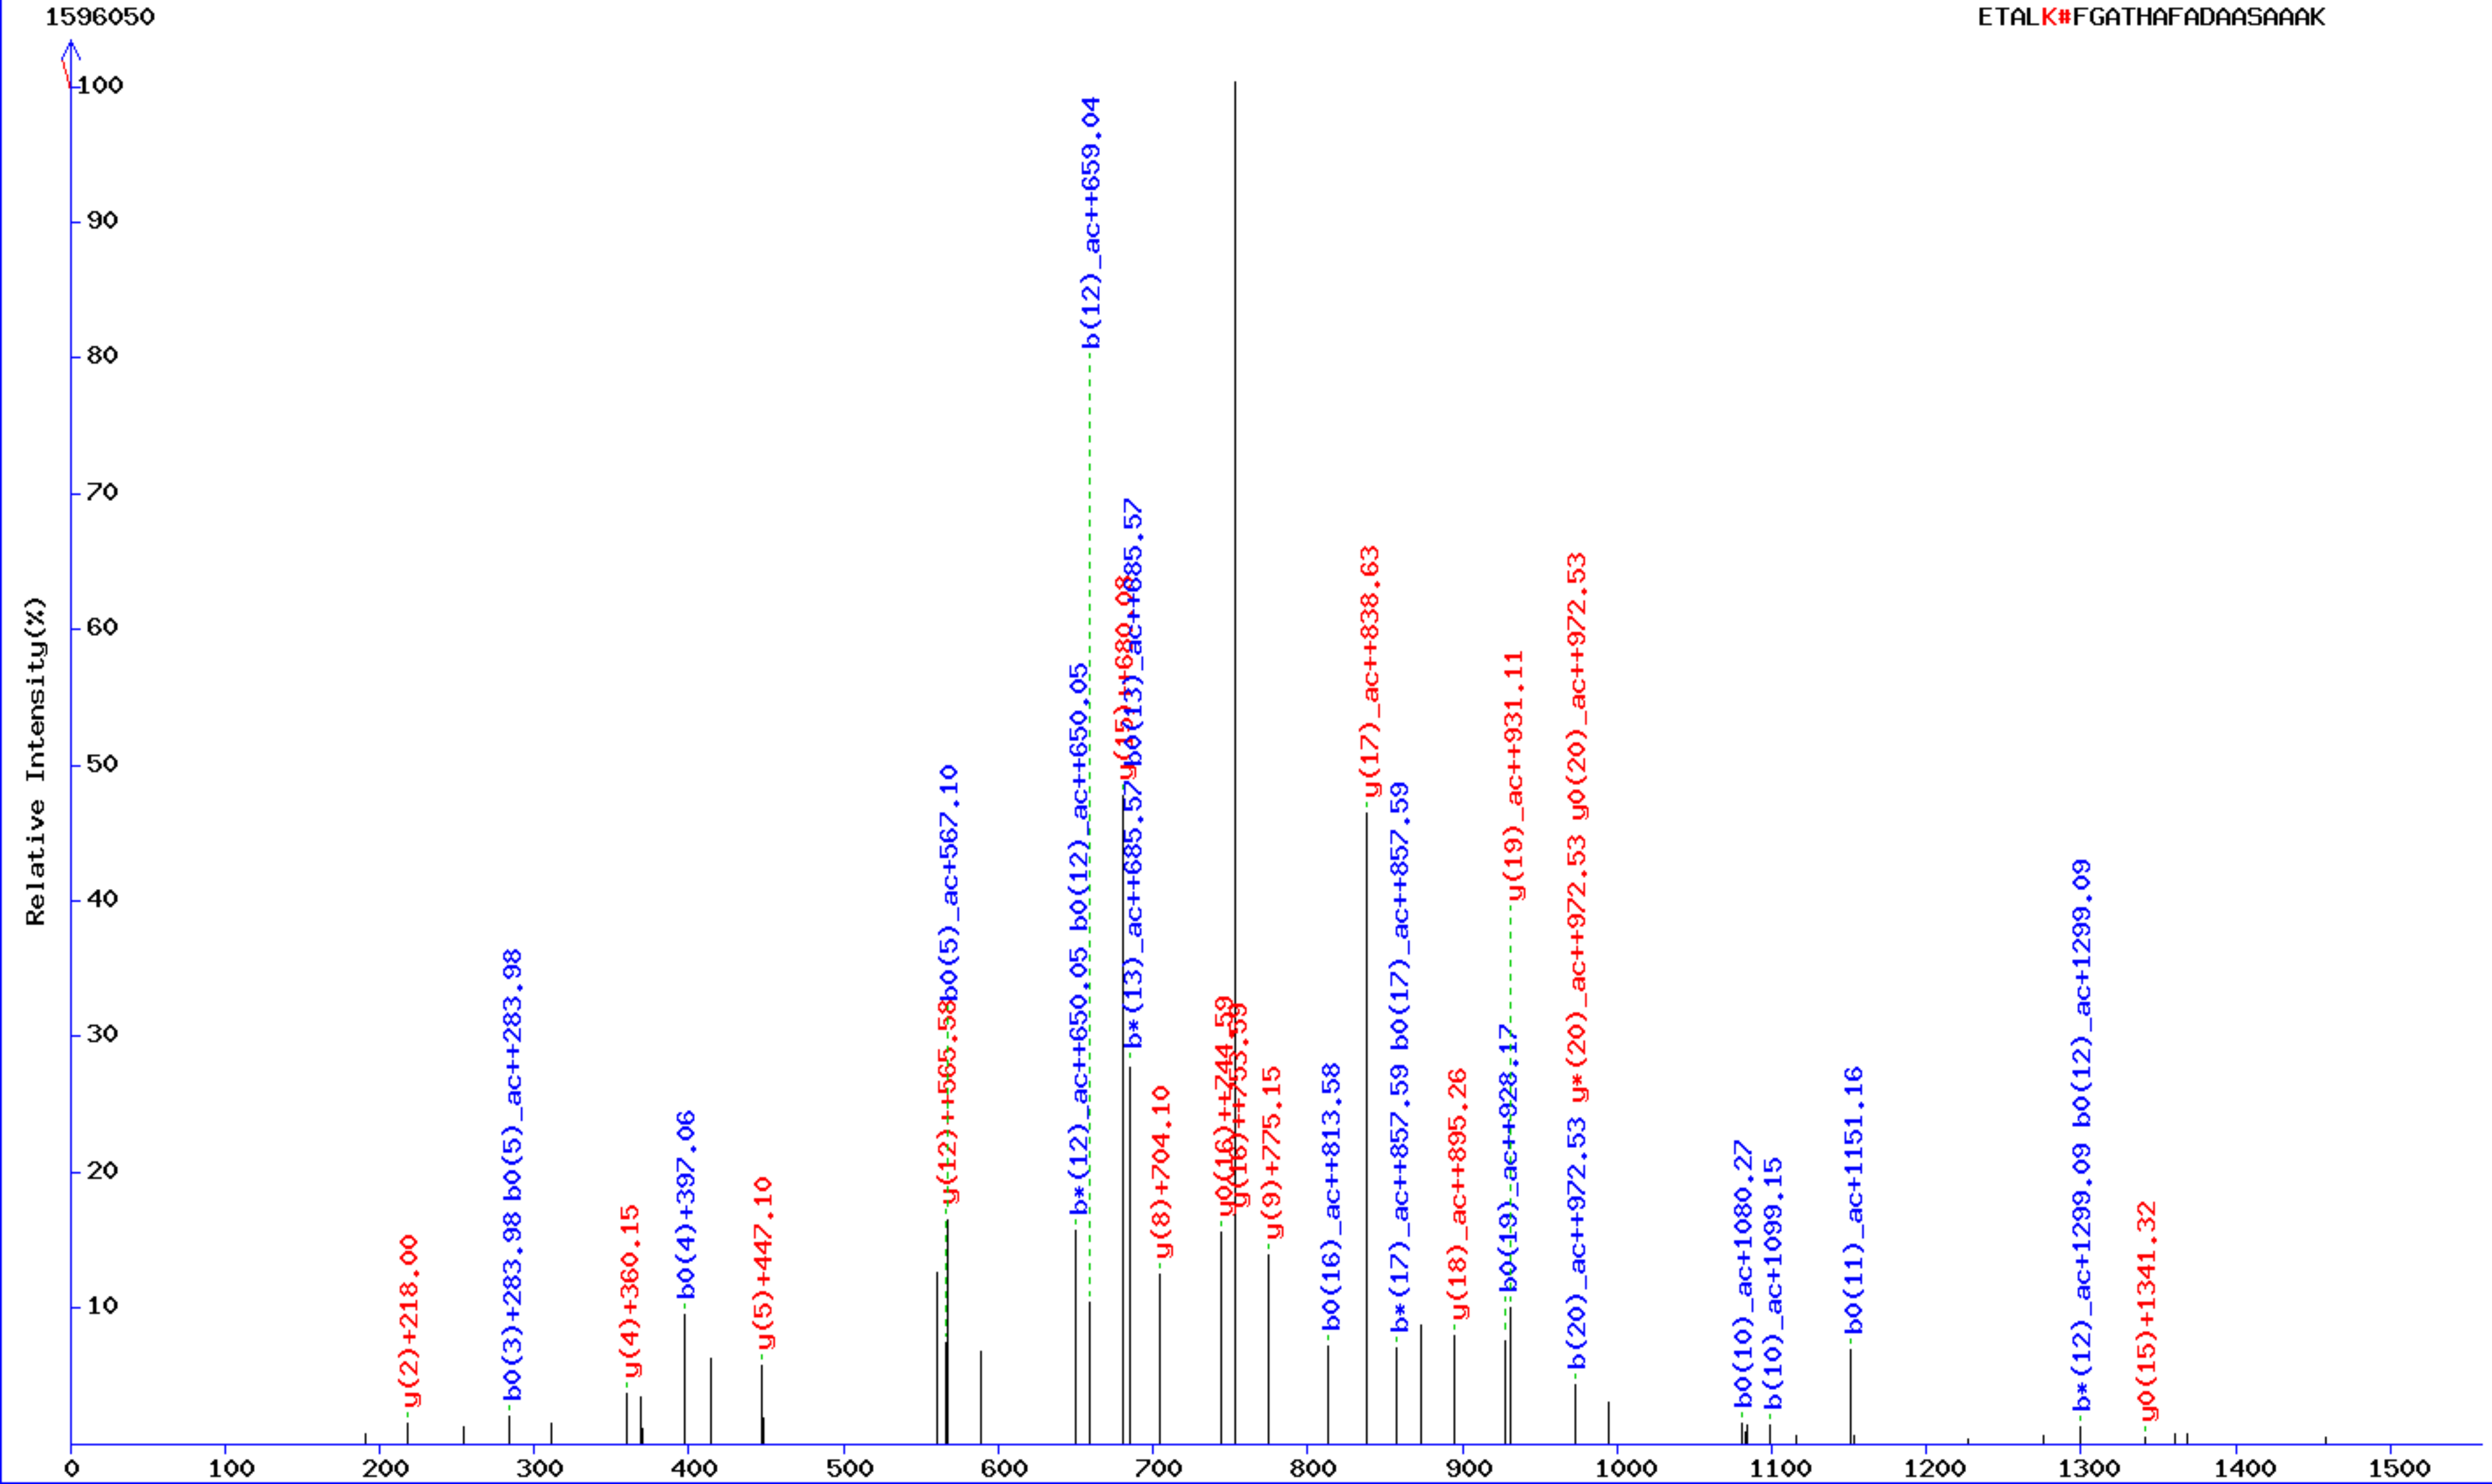

# gi|148663444 MRA\_3619 cysteinyl-tRNA synthetase

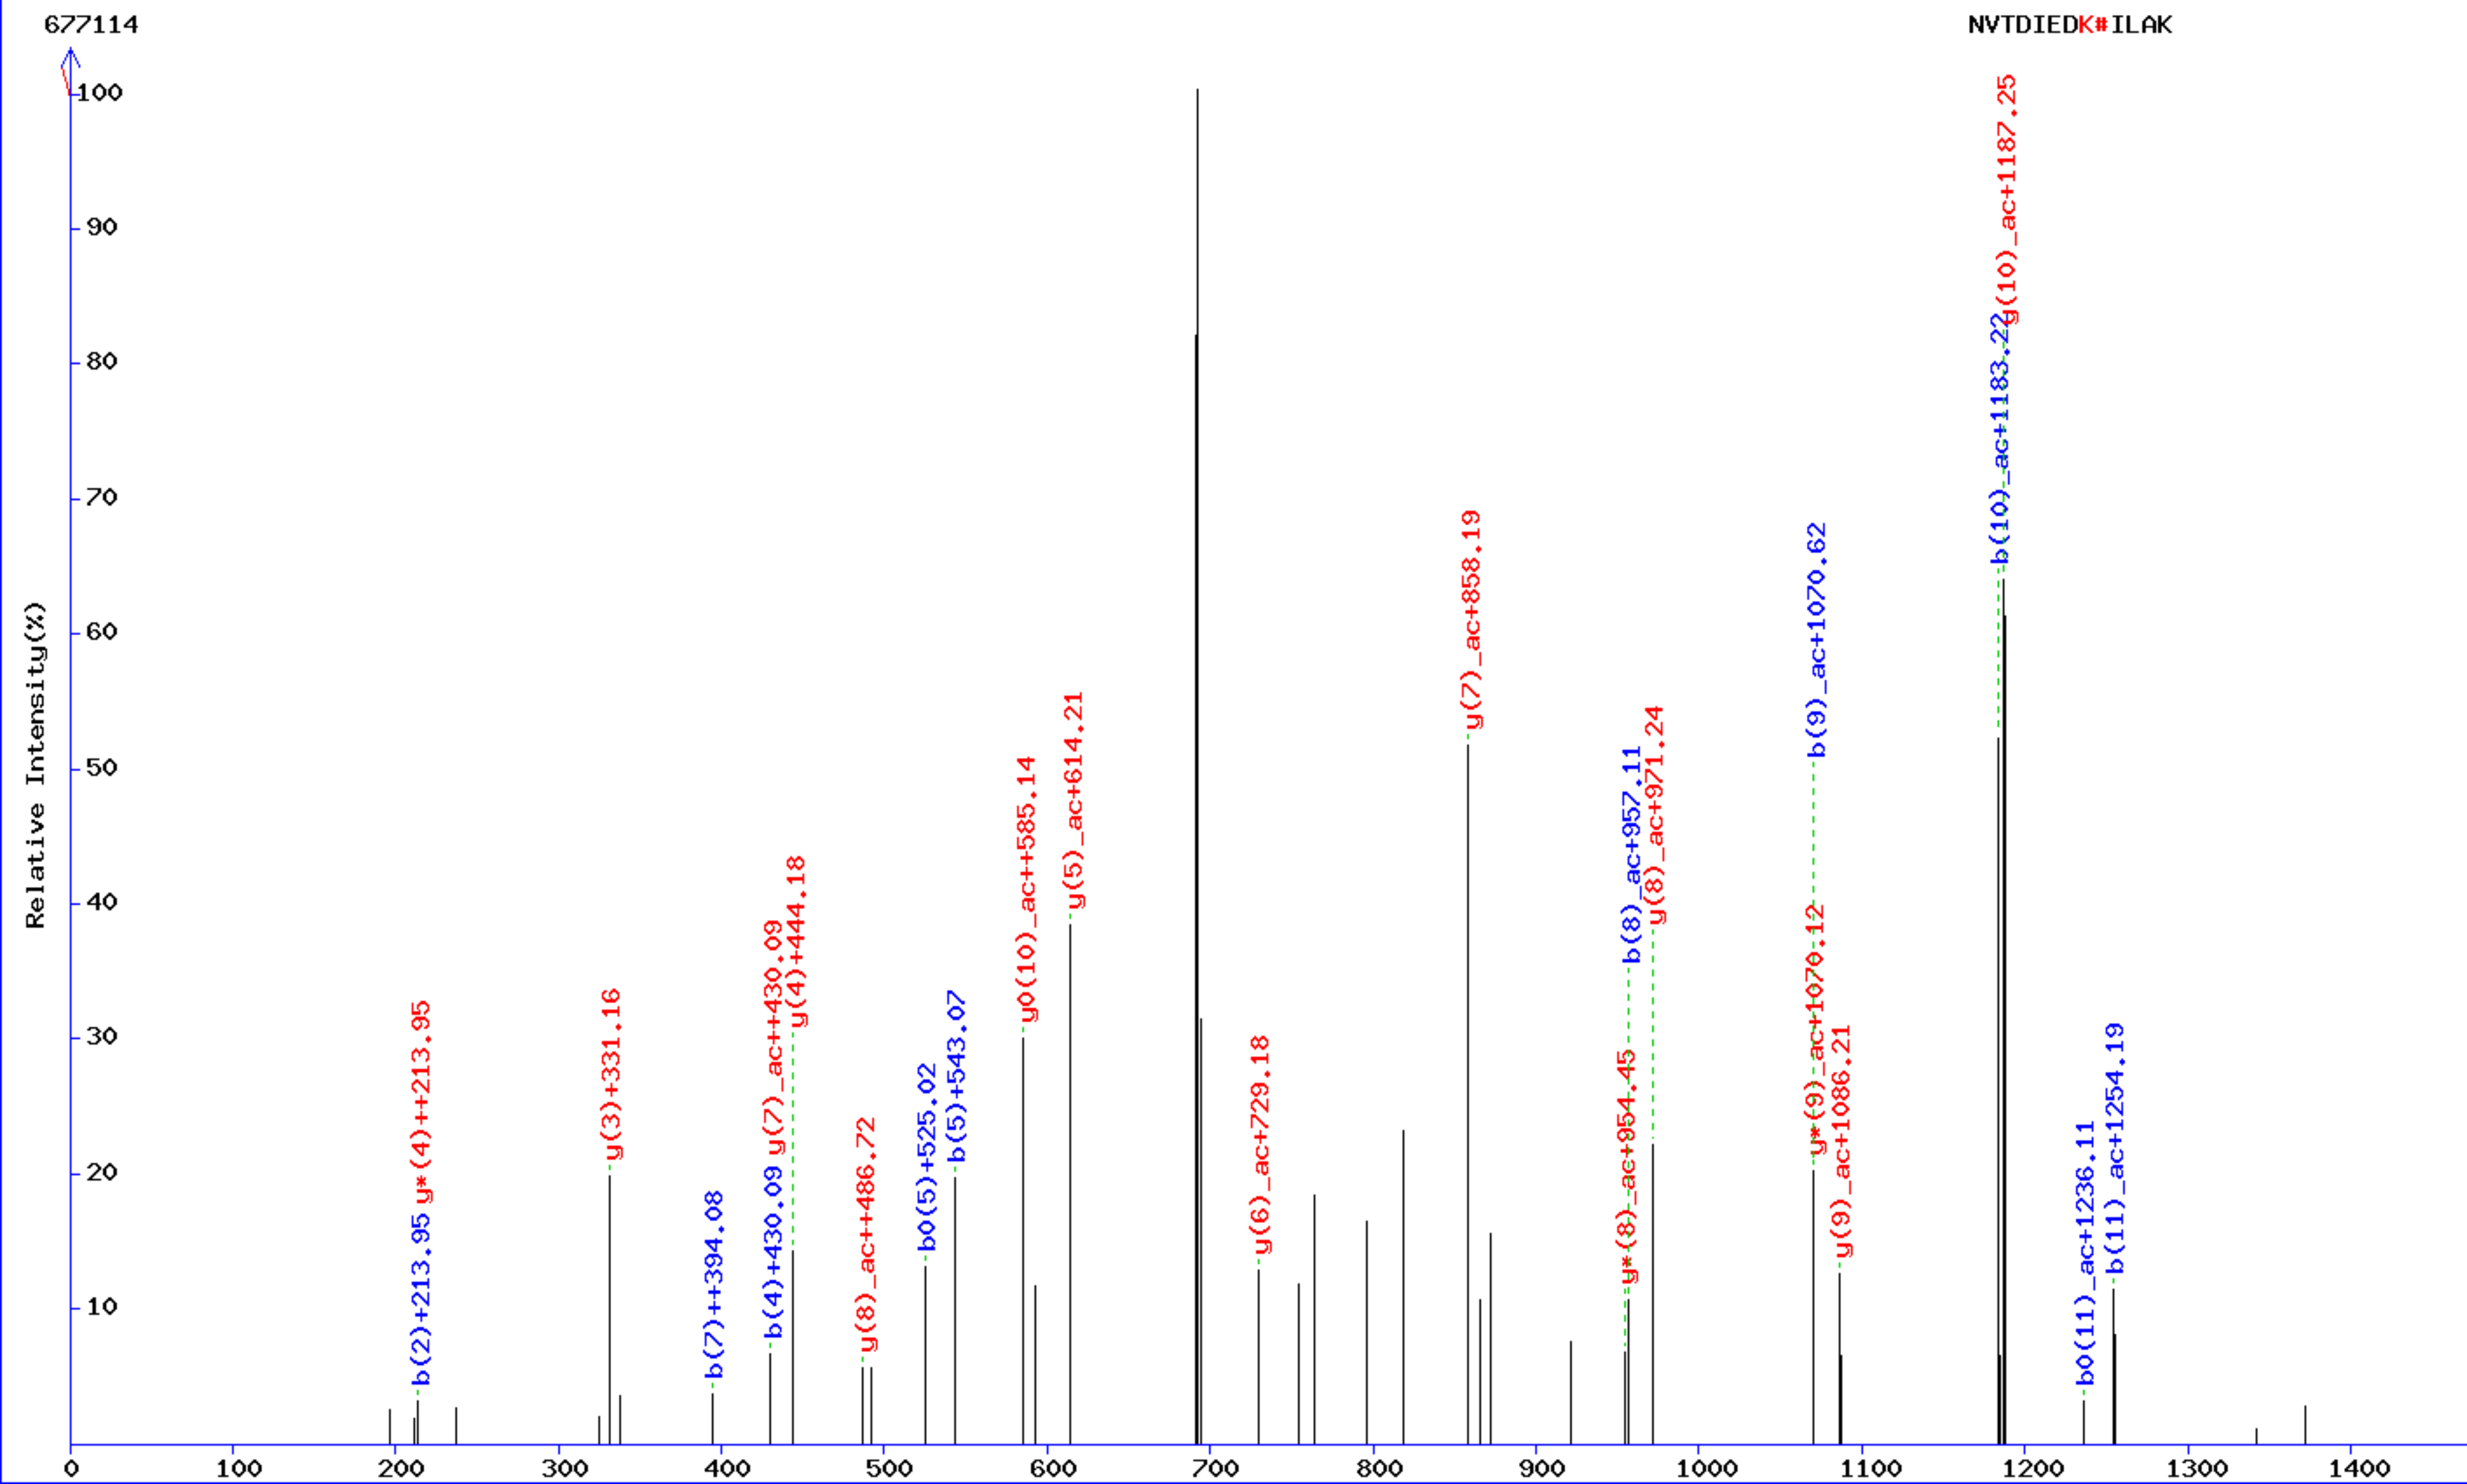

# gi|148661633 MRA\_1839 hypothetical protein

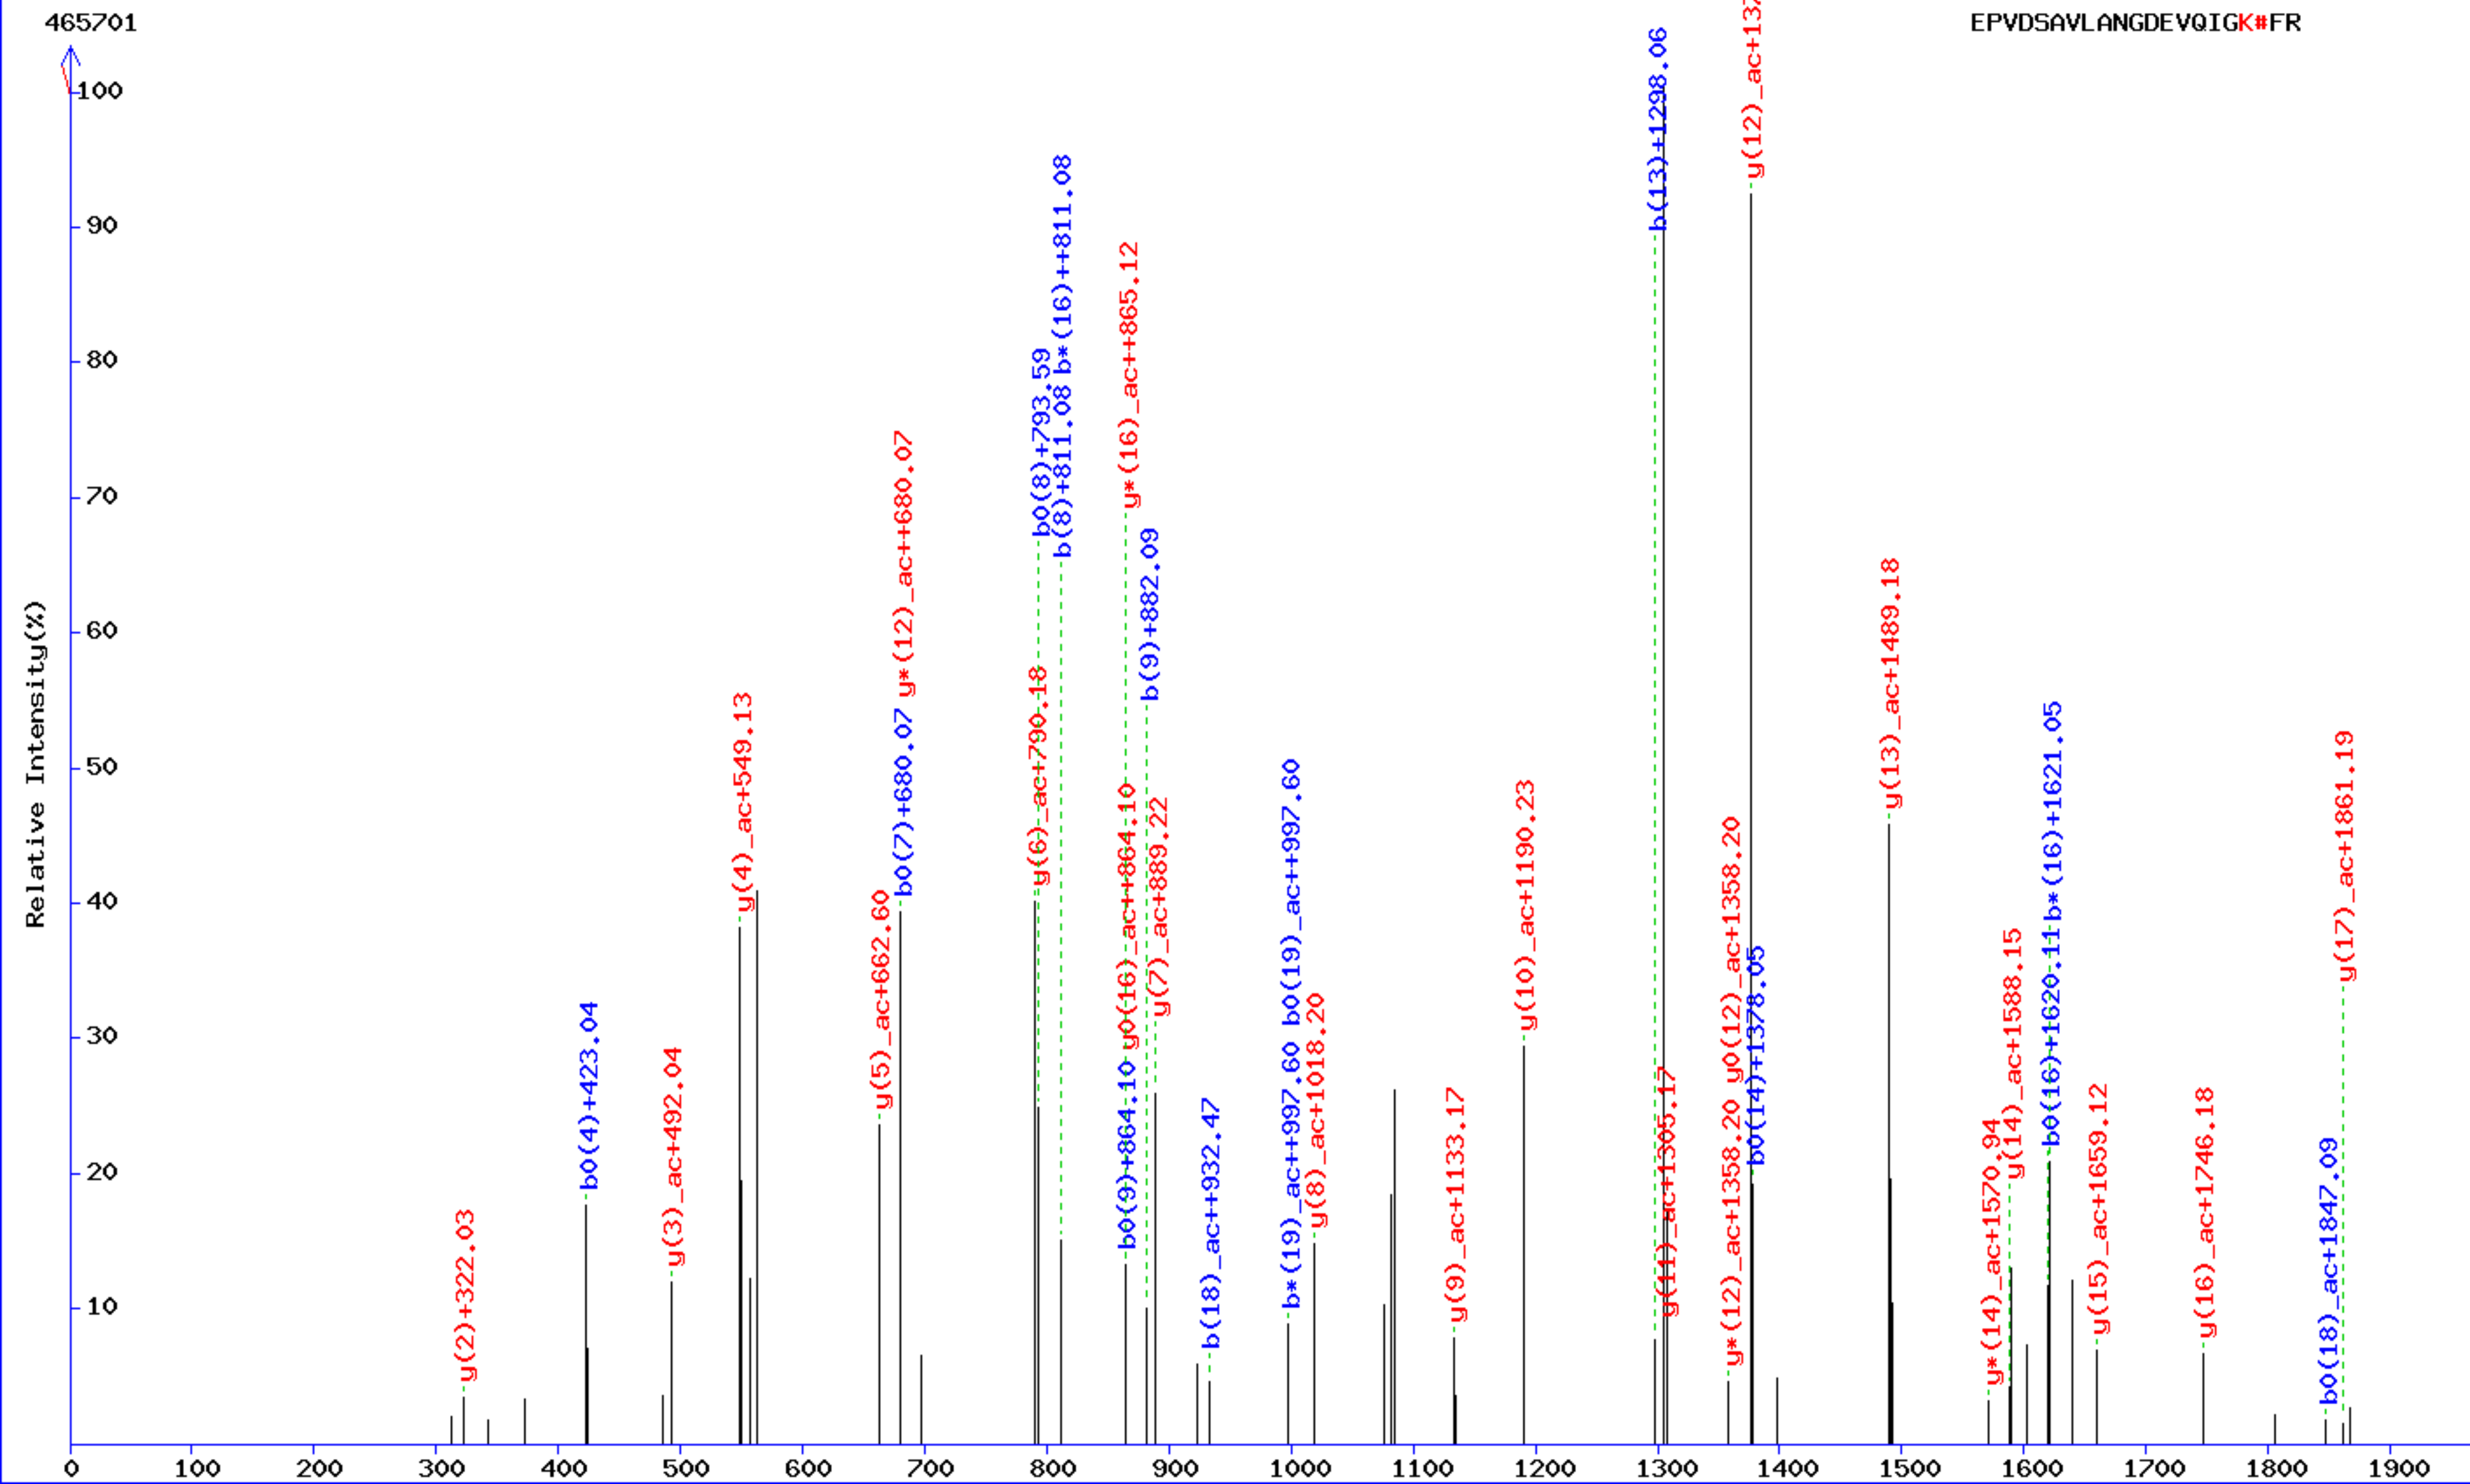

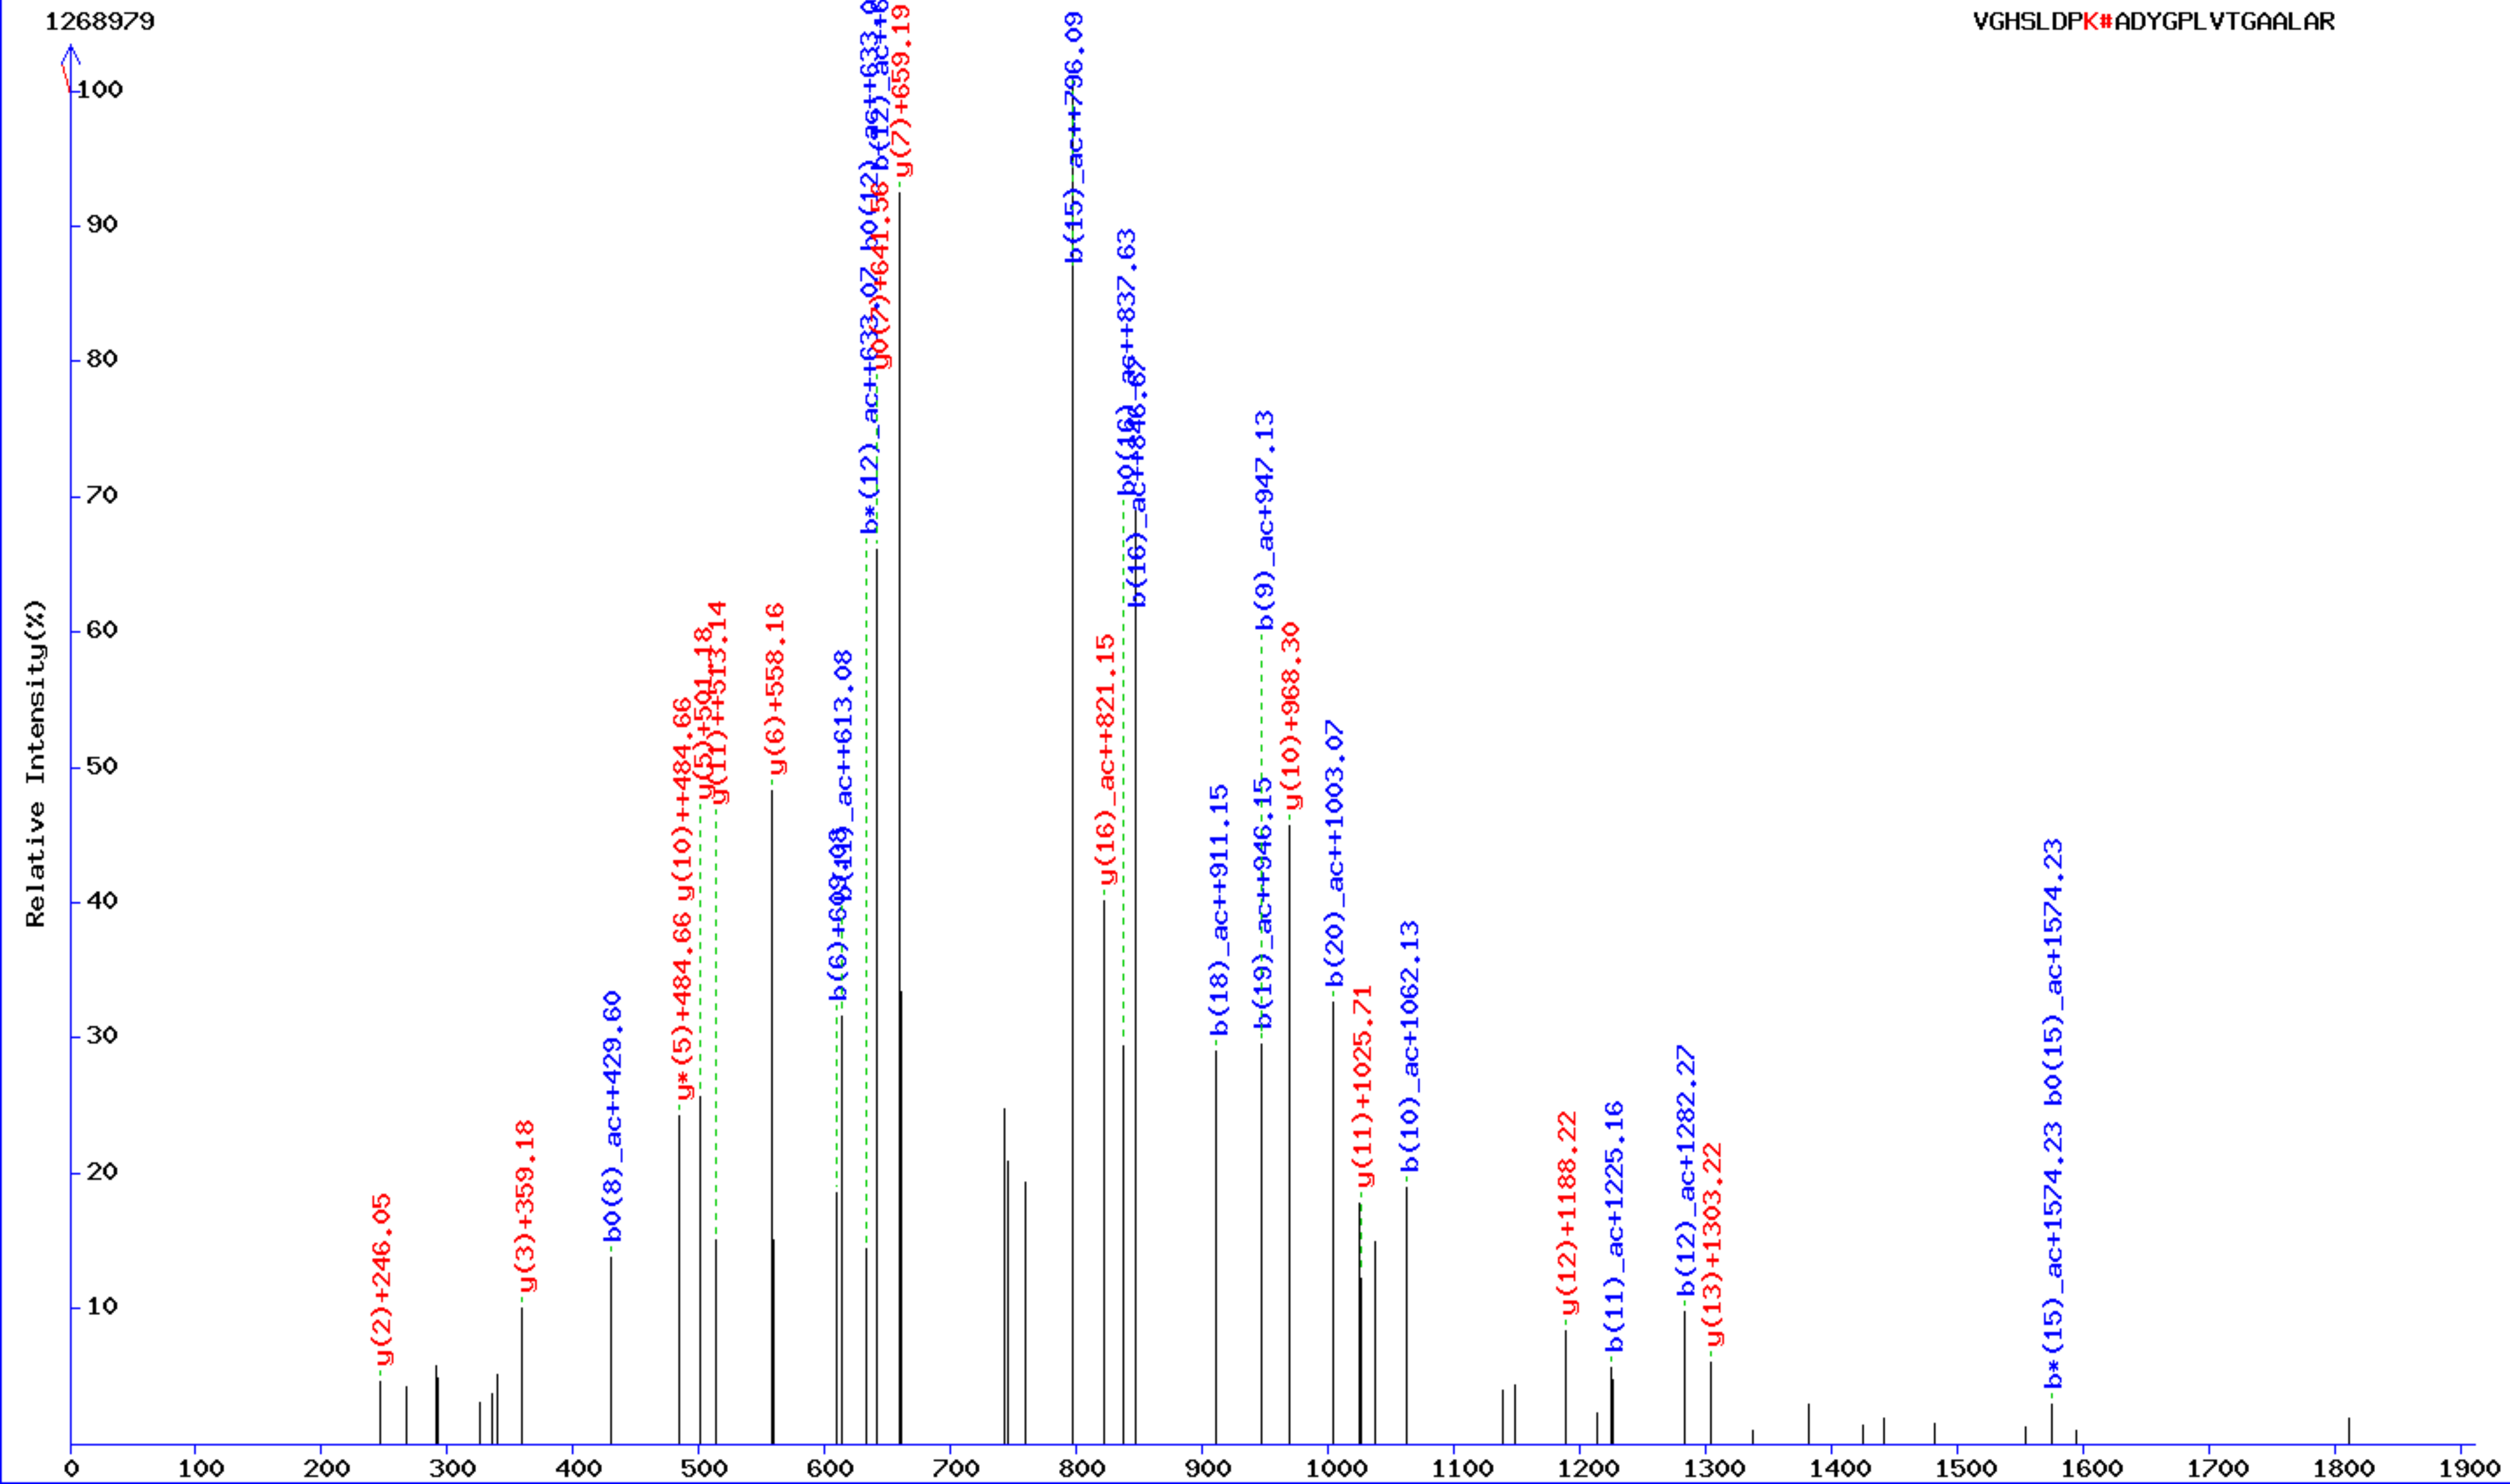

# gi|148661633 MRA\_1839 hypothetical protein

EPVDSAVLANGDEVQIGK#FR

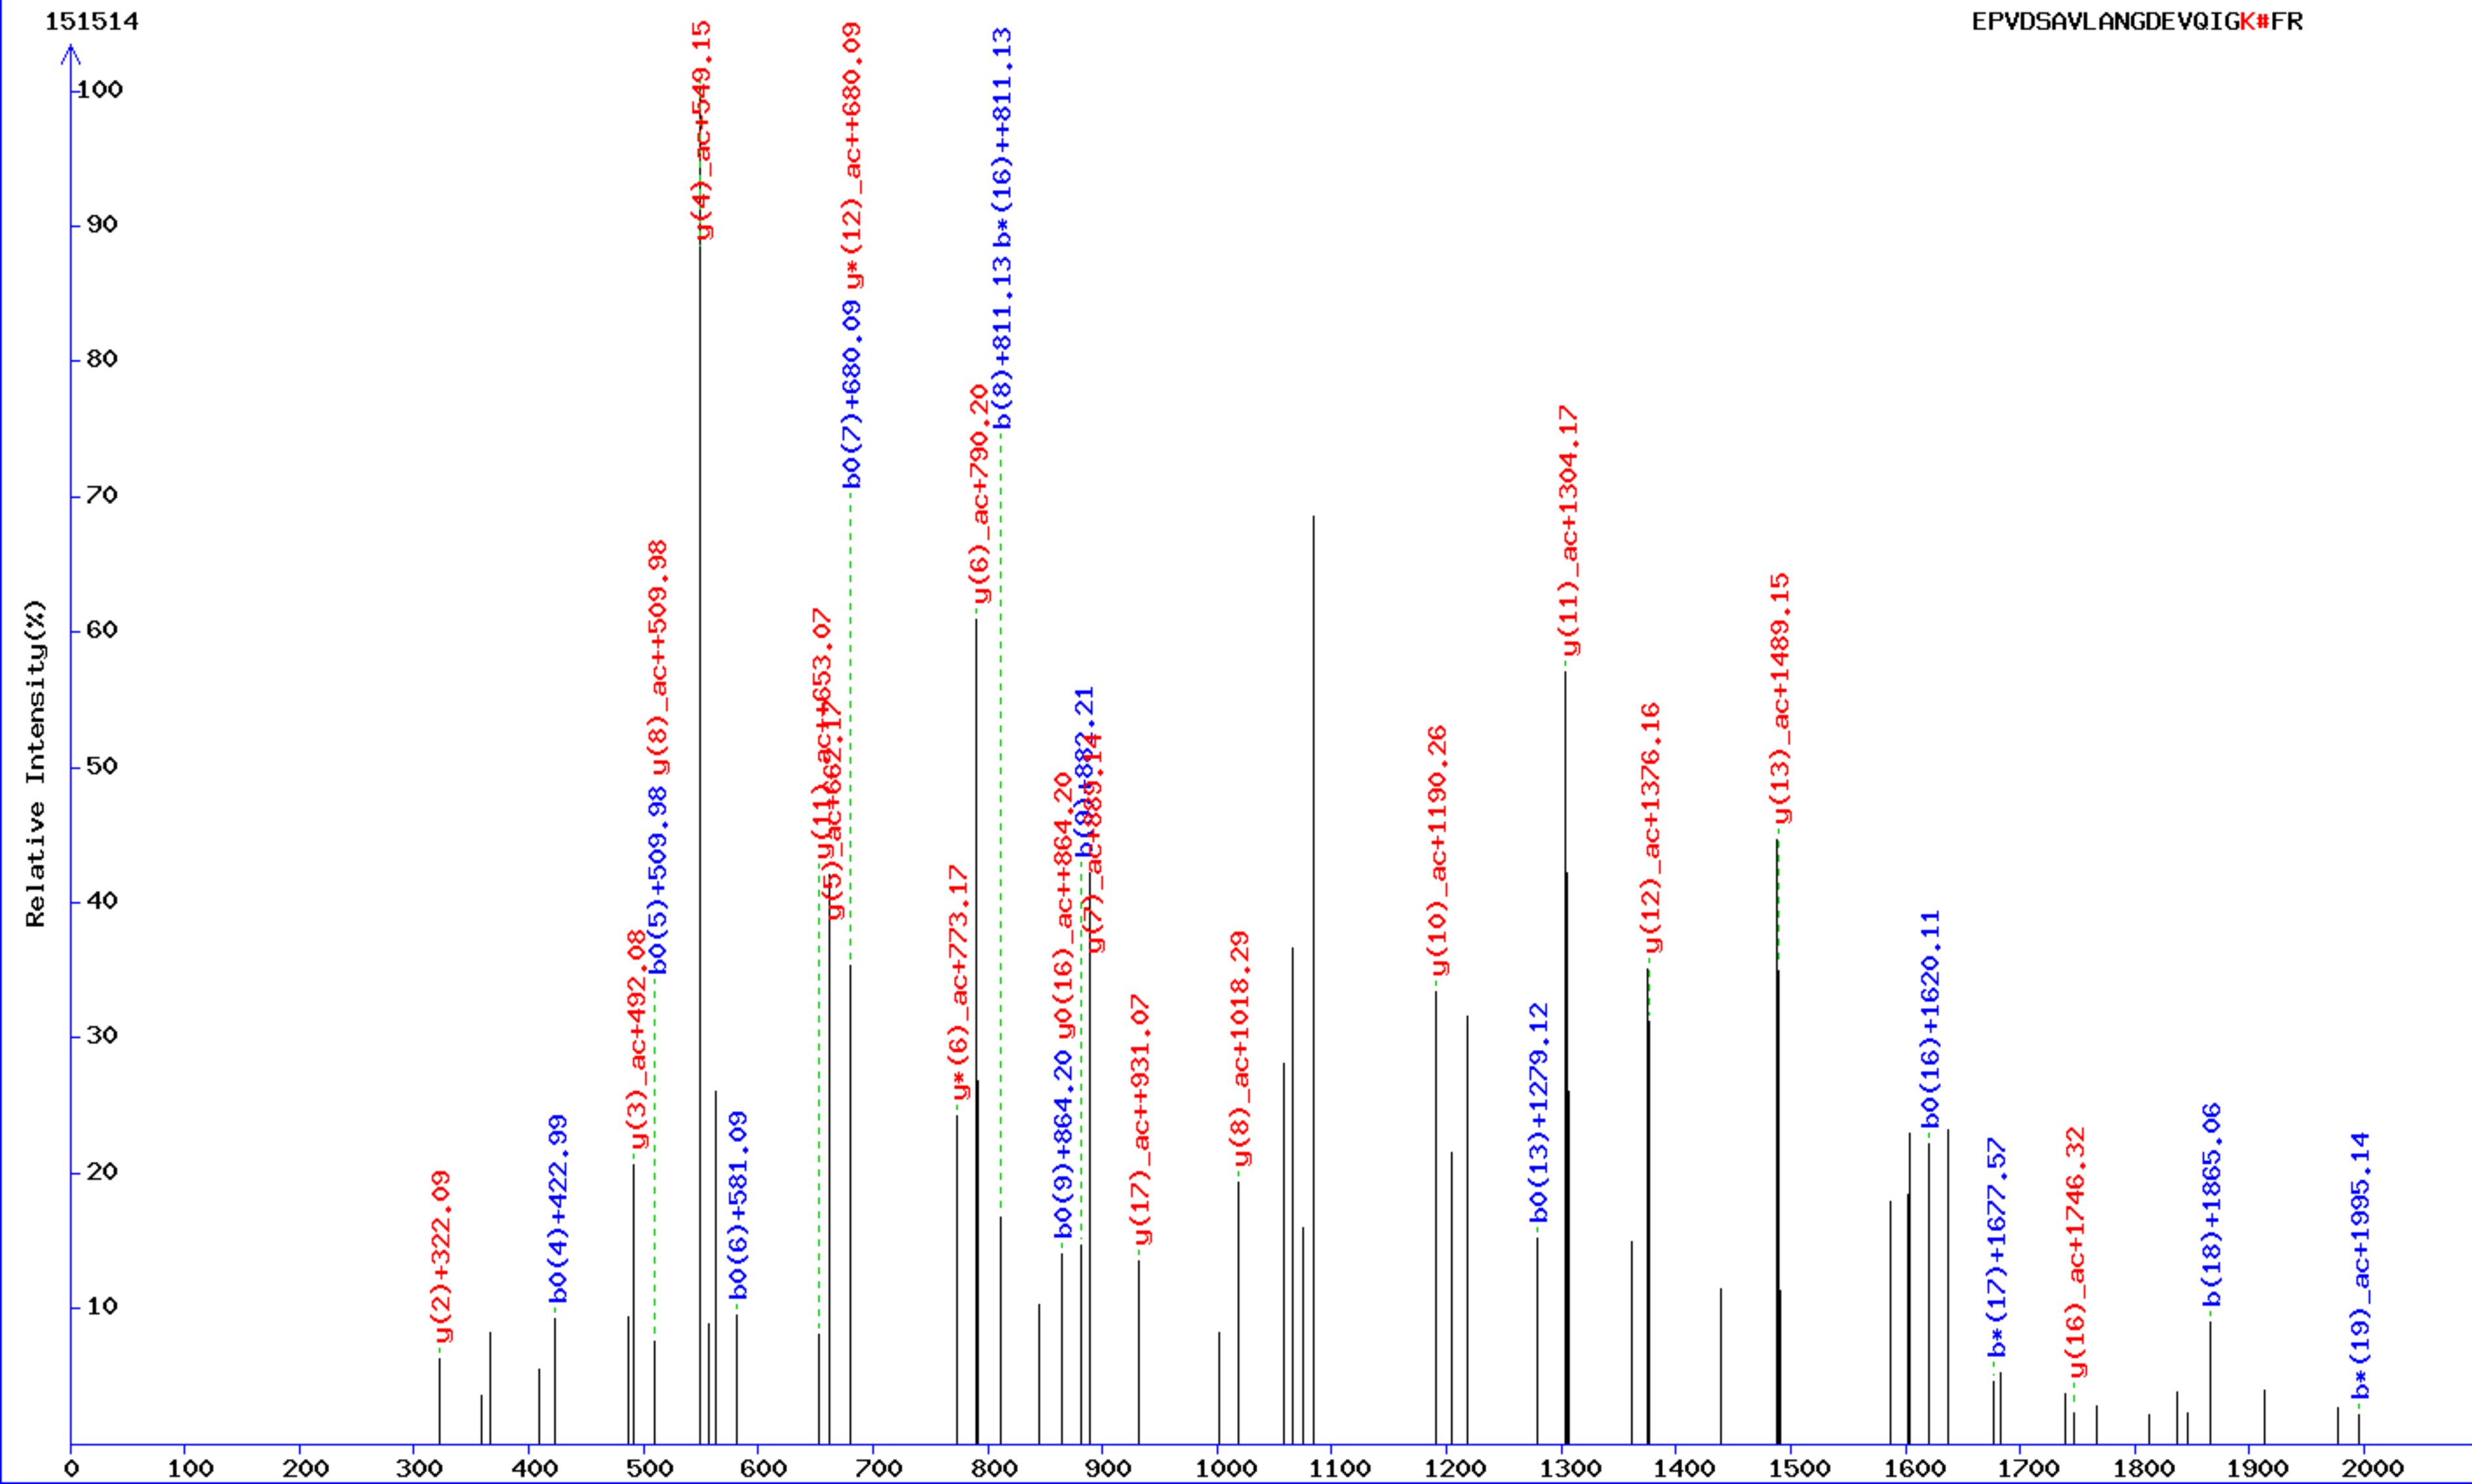

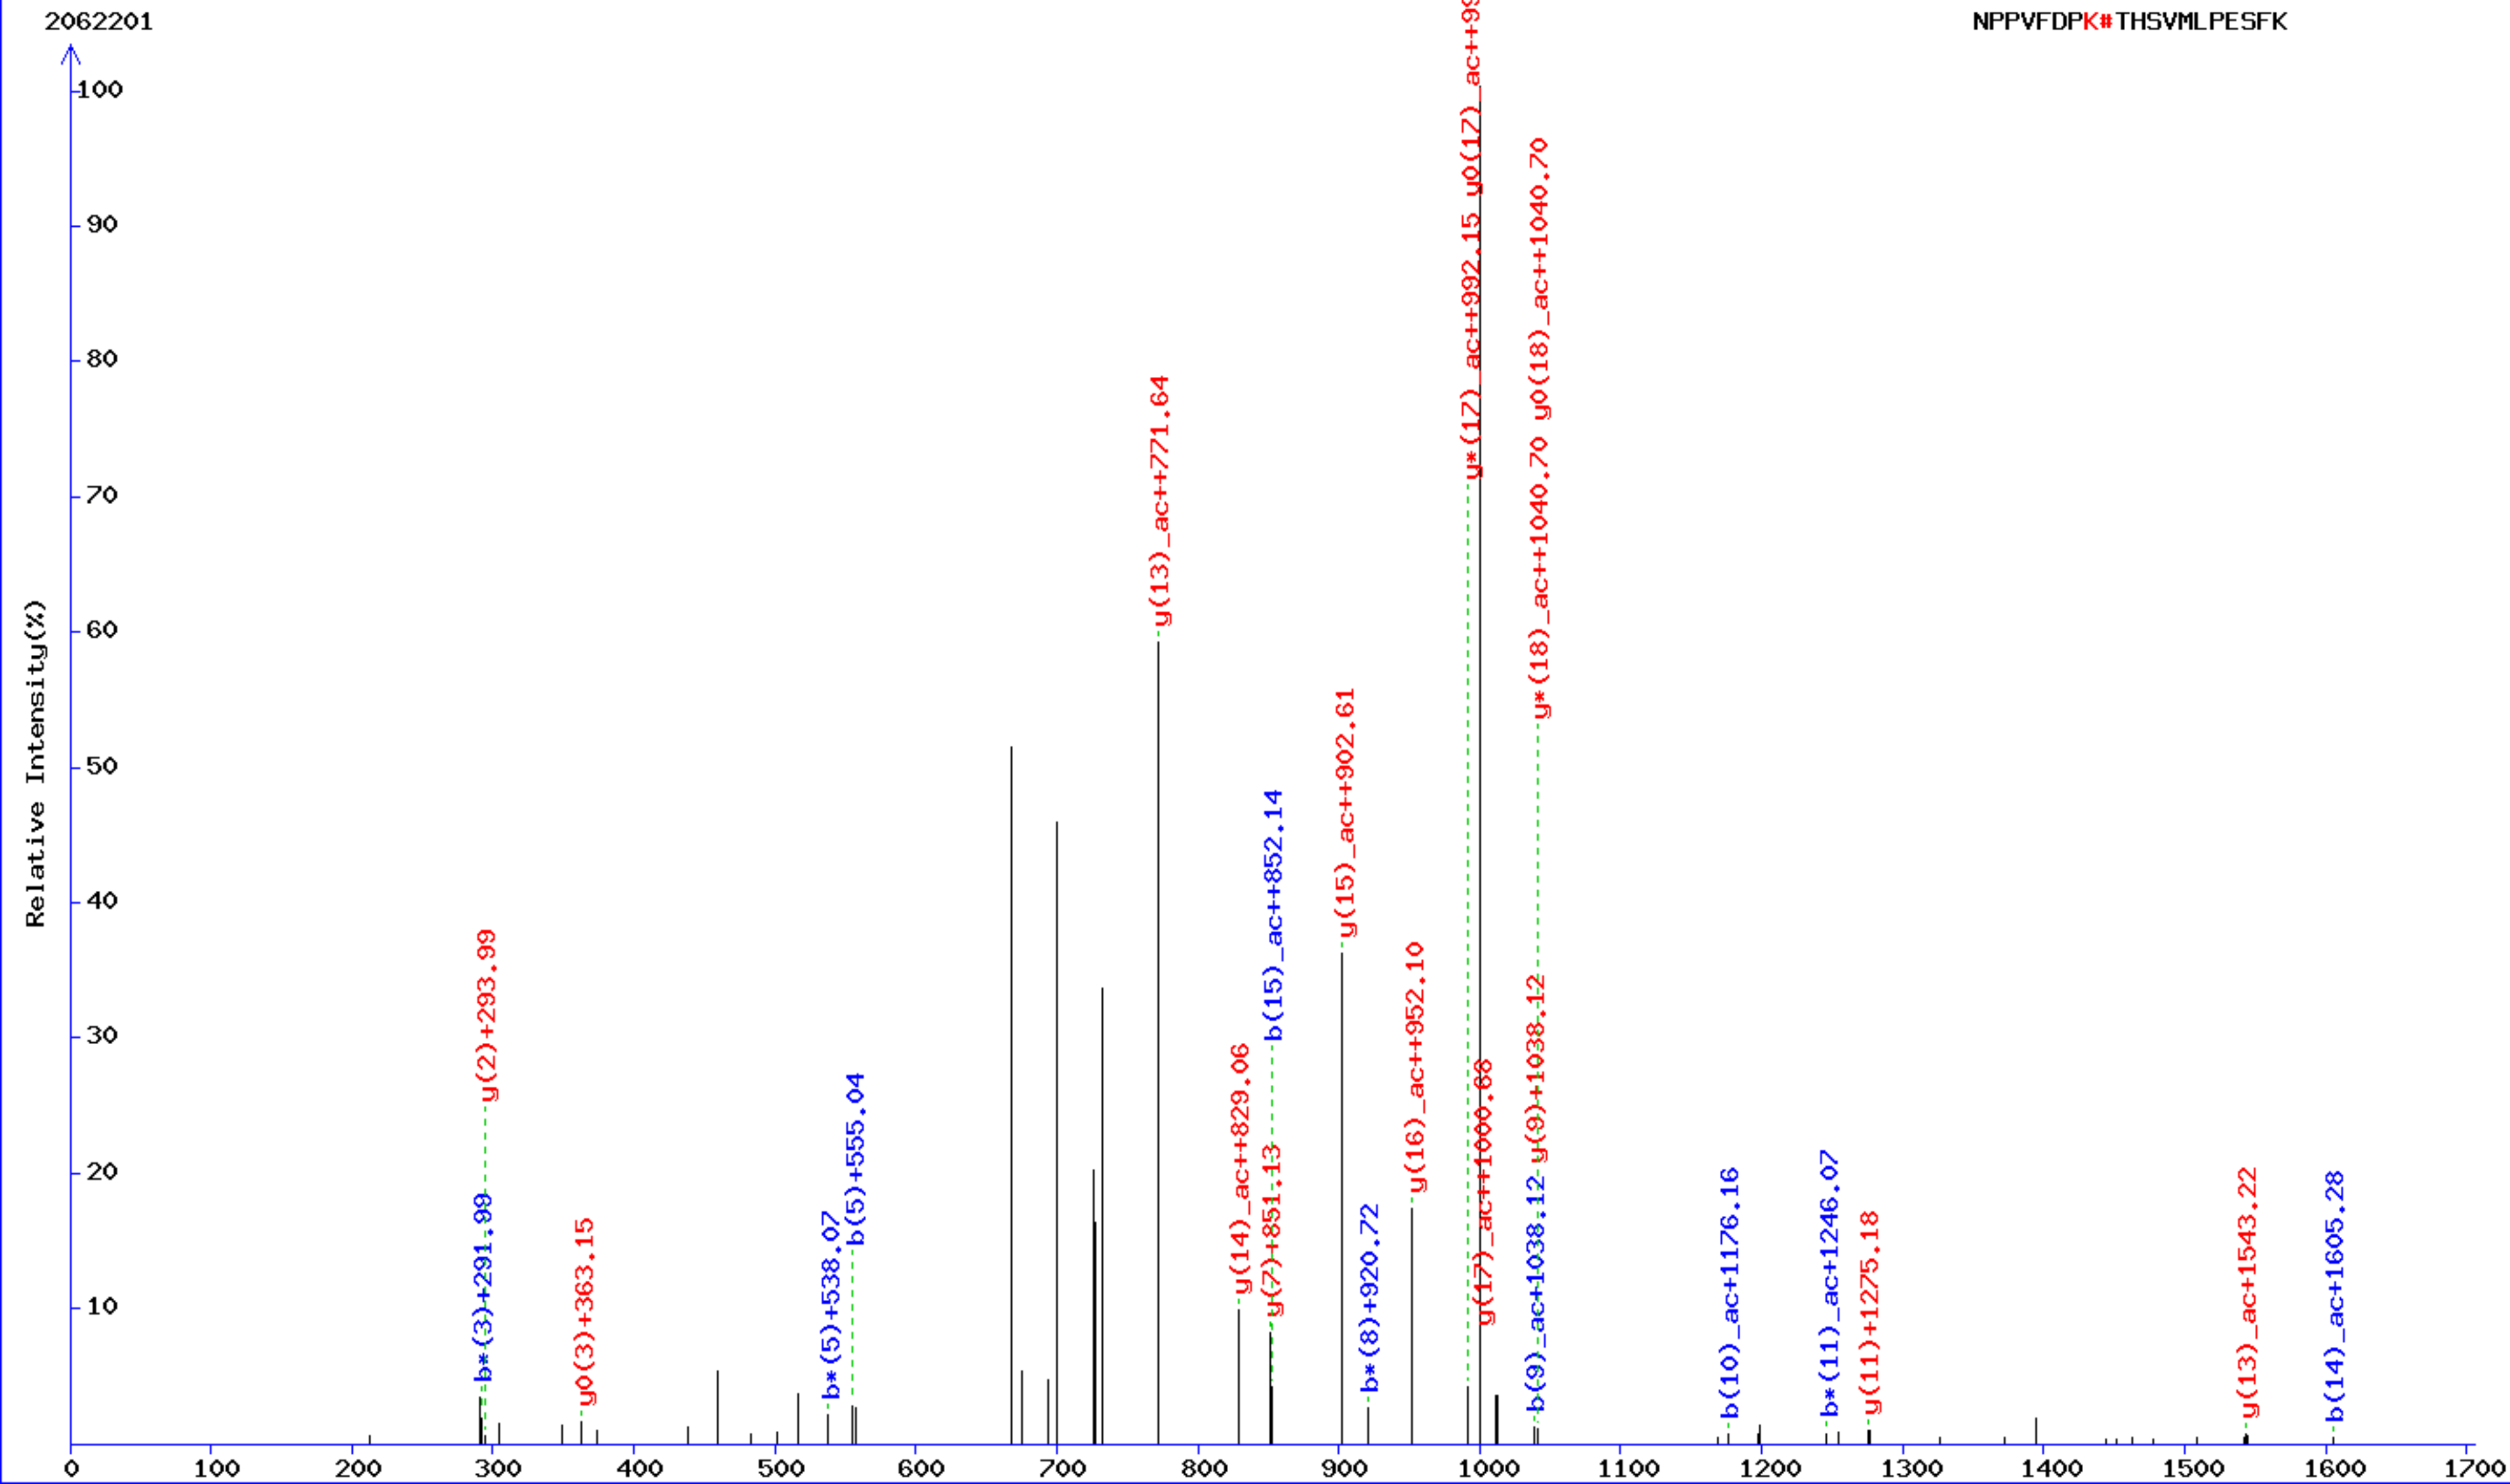

# gi|148662586 MRA\_2770 hypothetical protein

IDEHADPK#VQIQQAIEEAQR

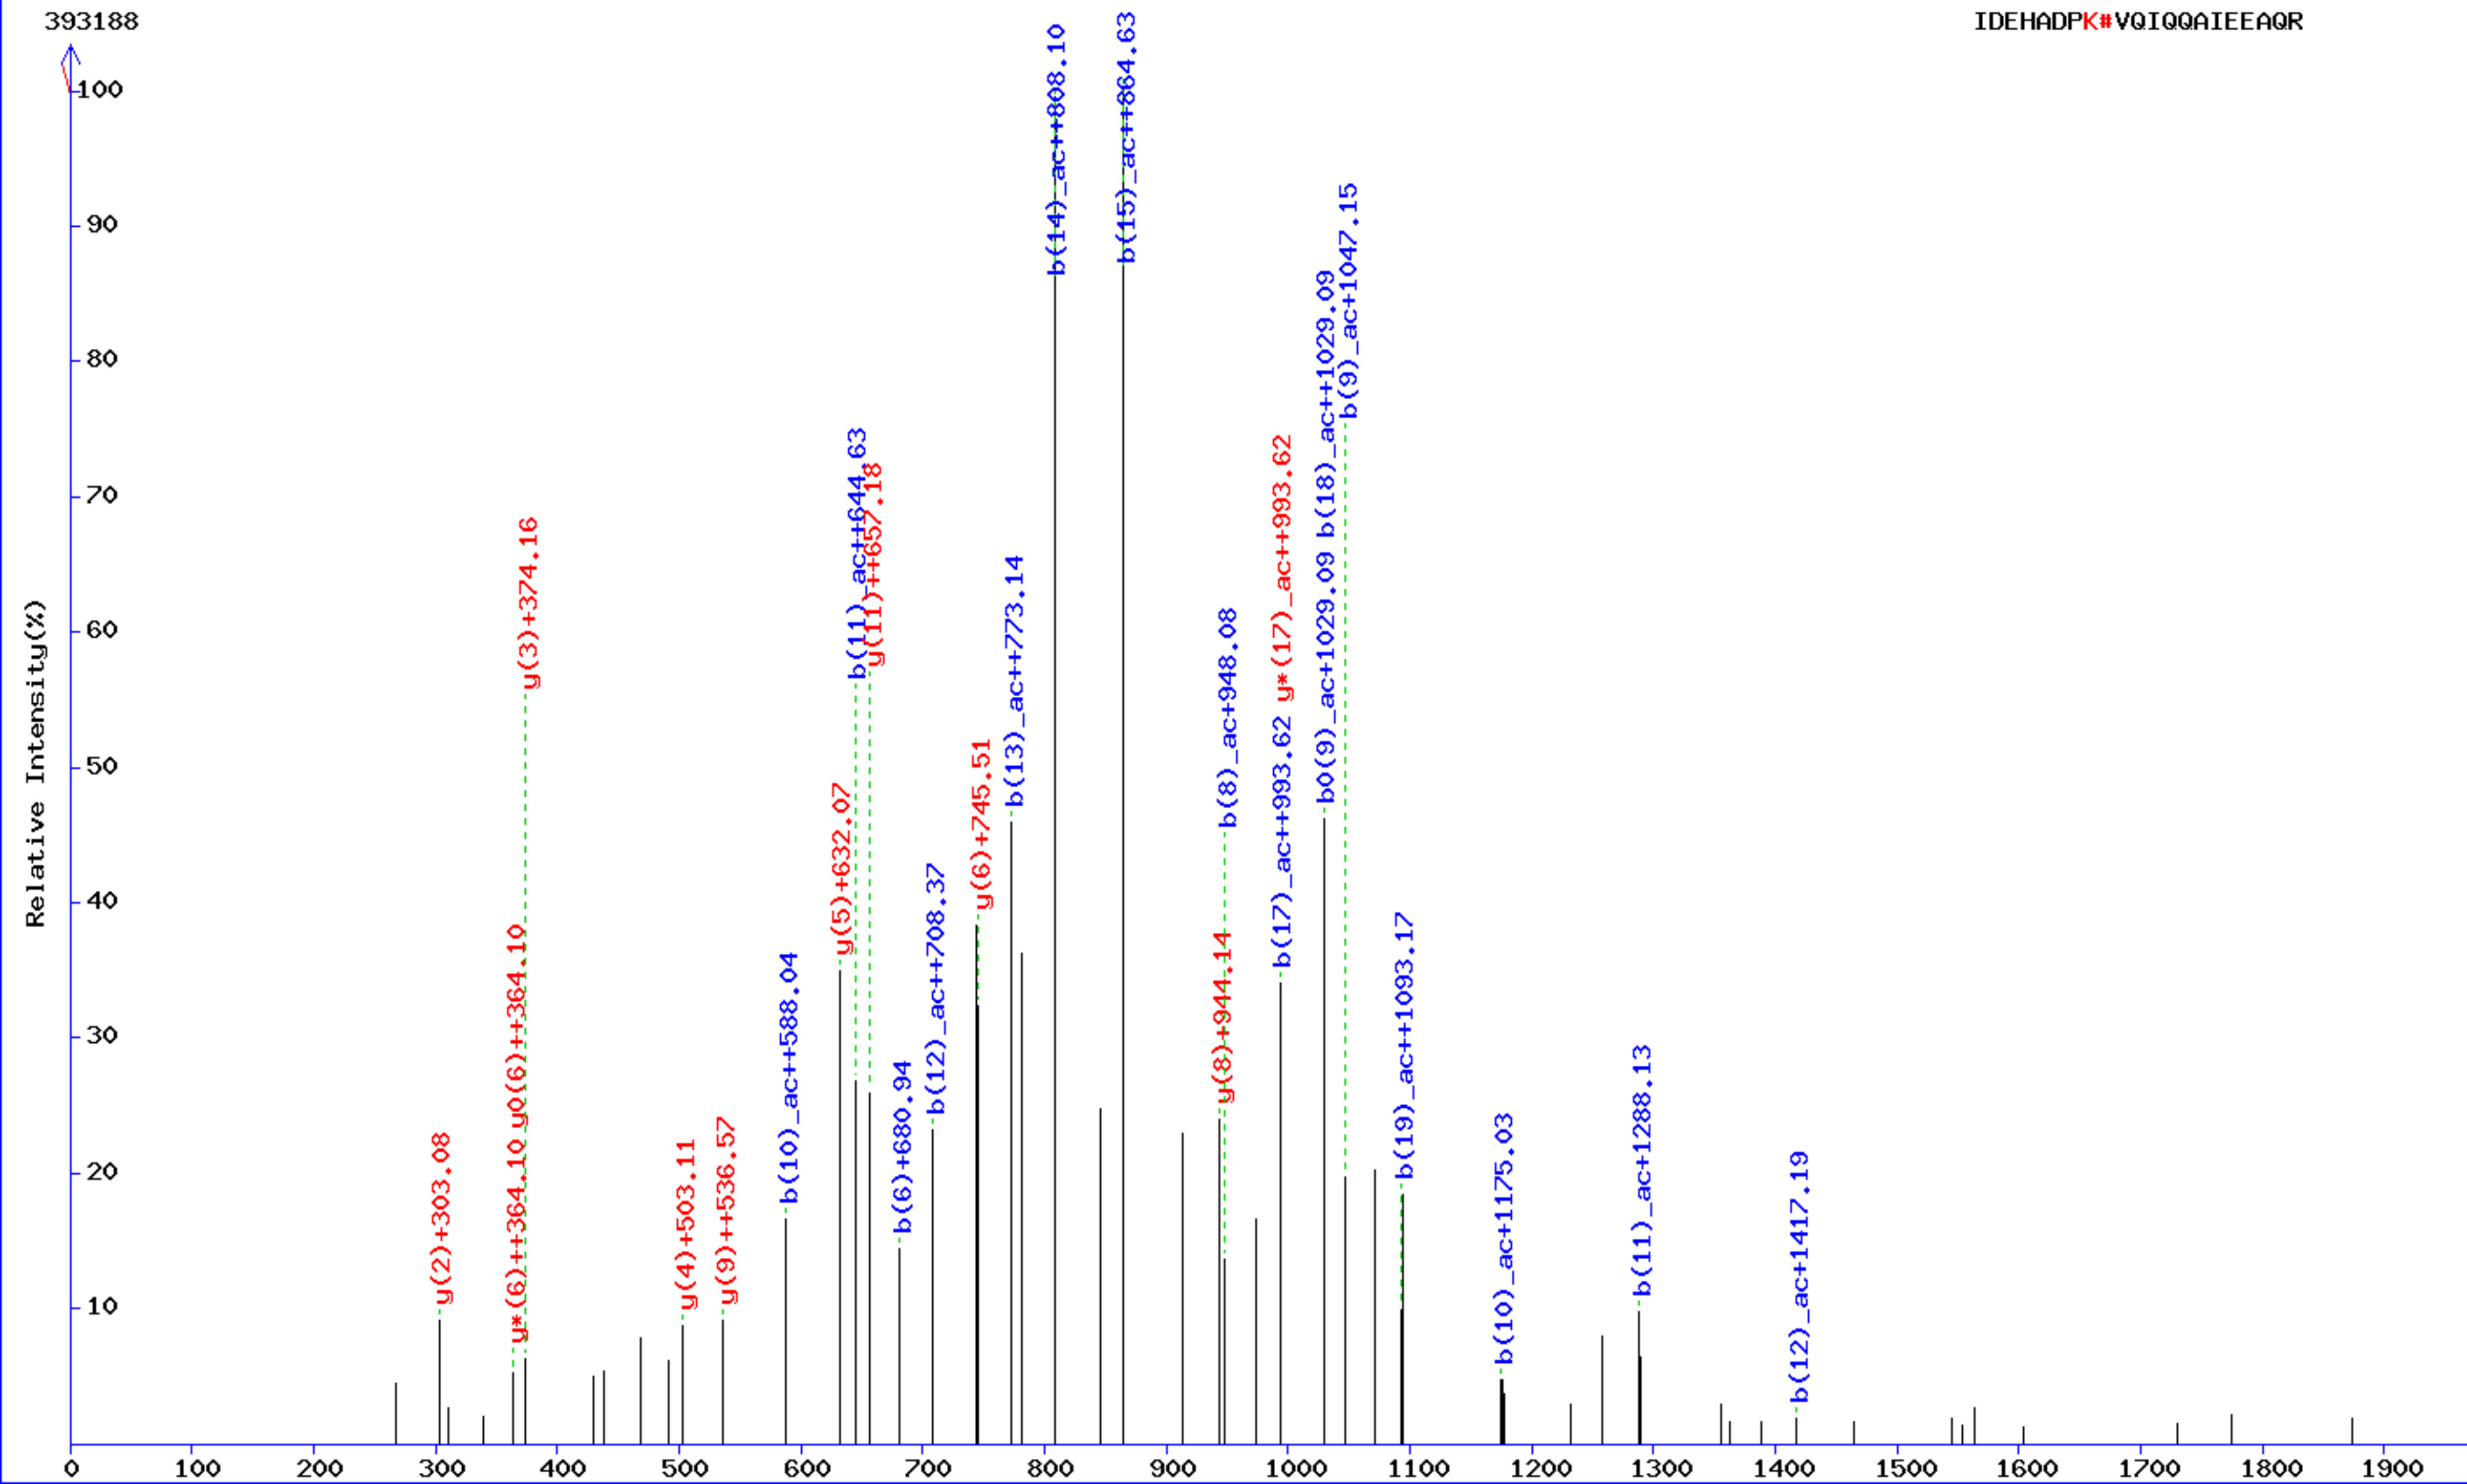

# gi|148660205 MRA\_0445 molecular chaperone GroEL

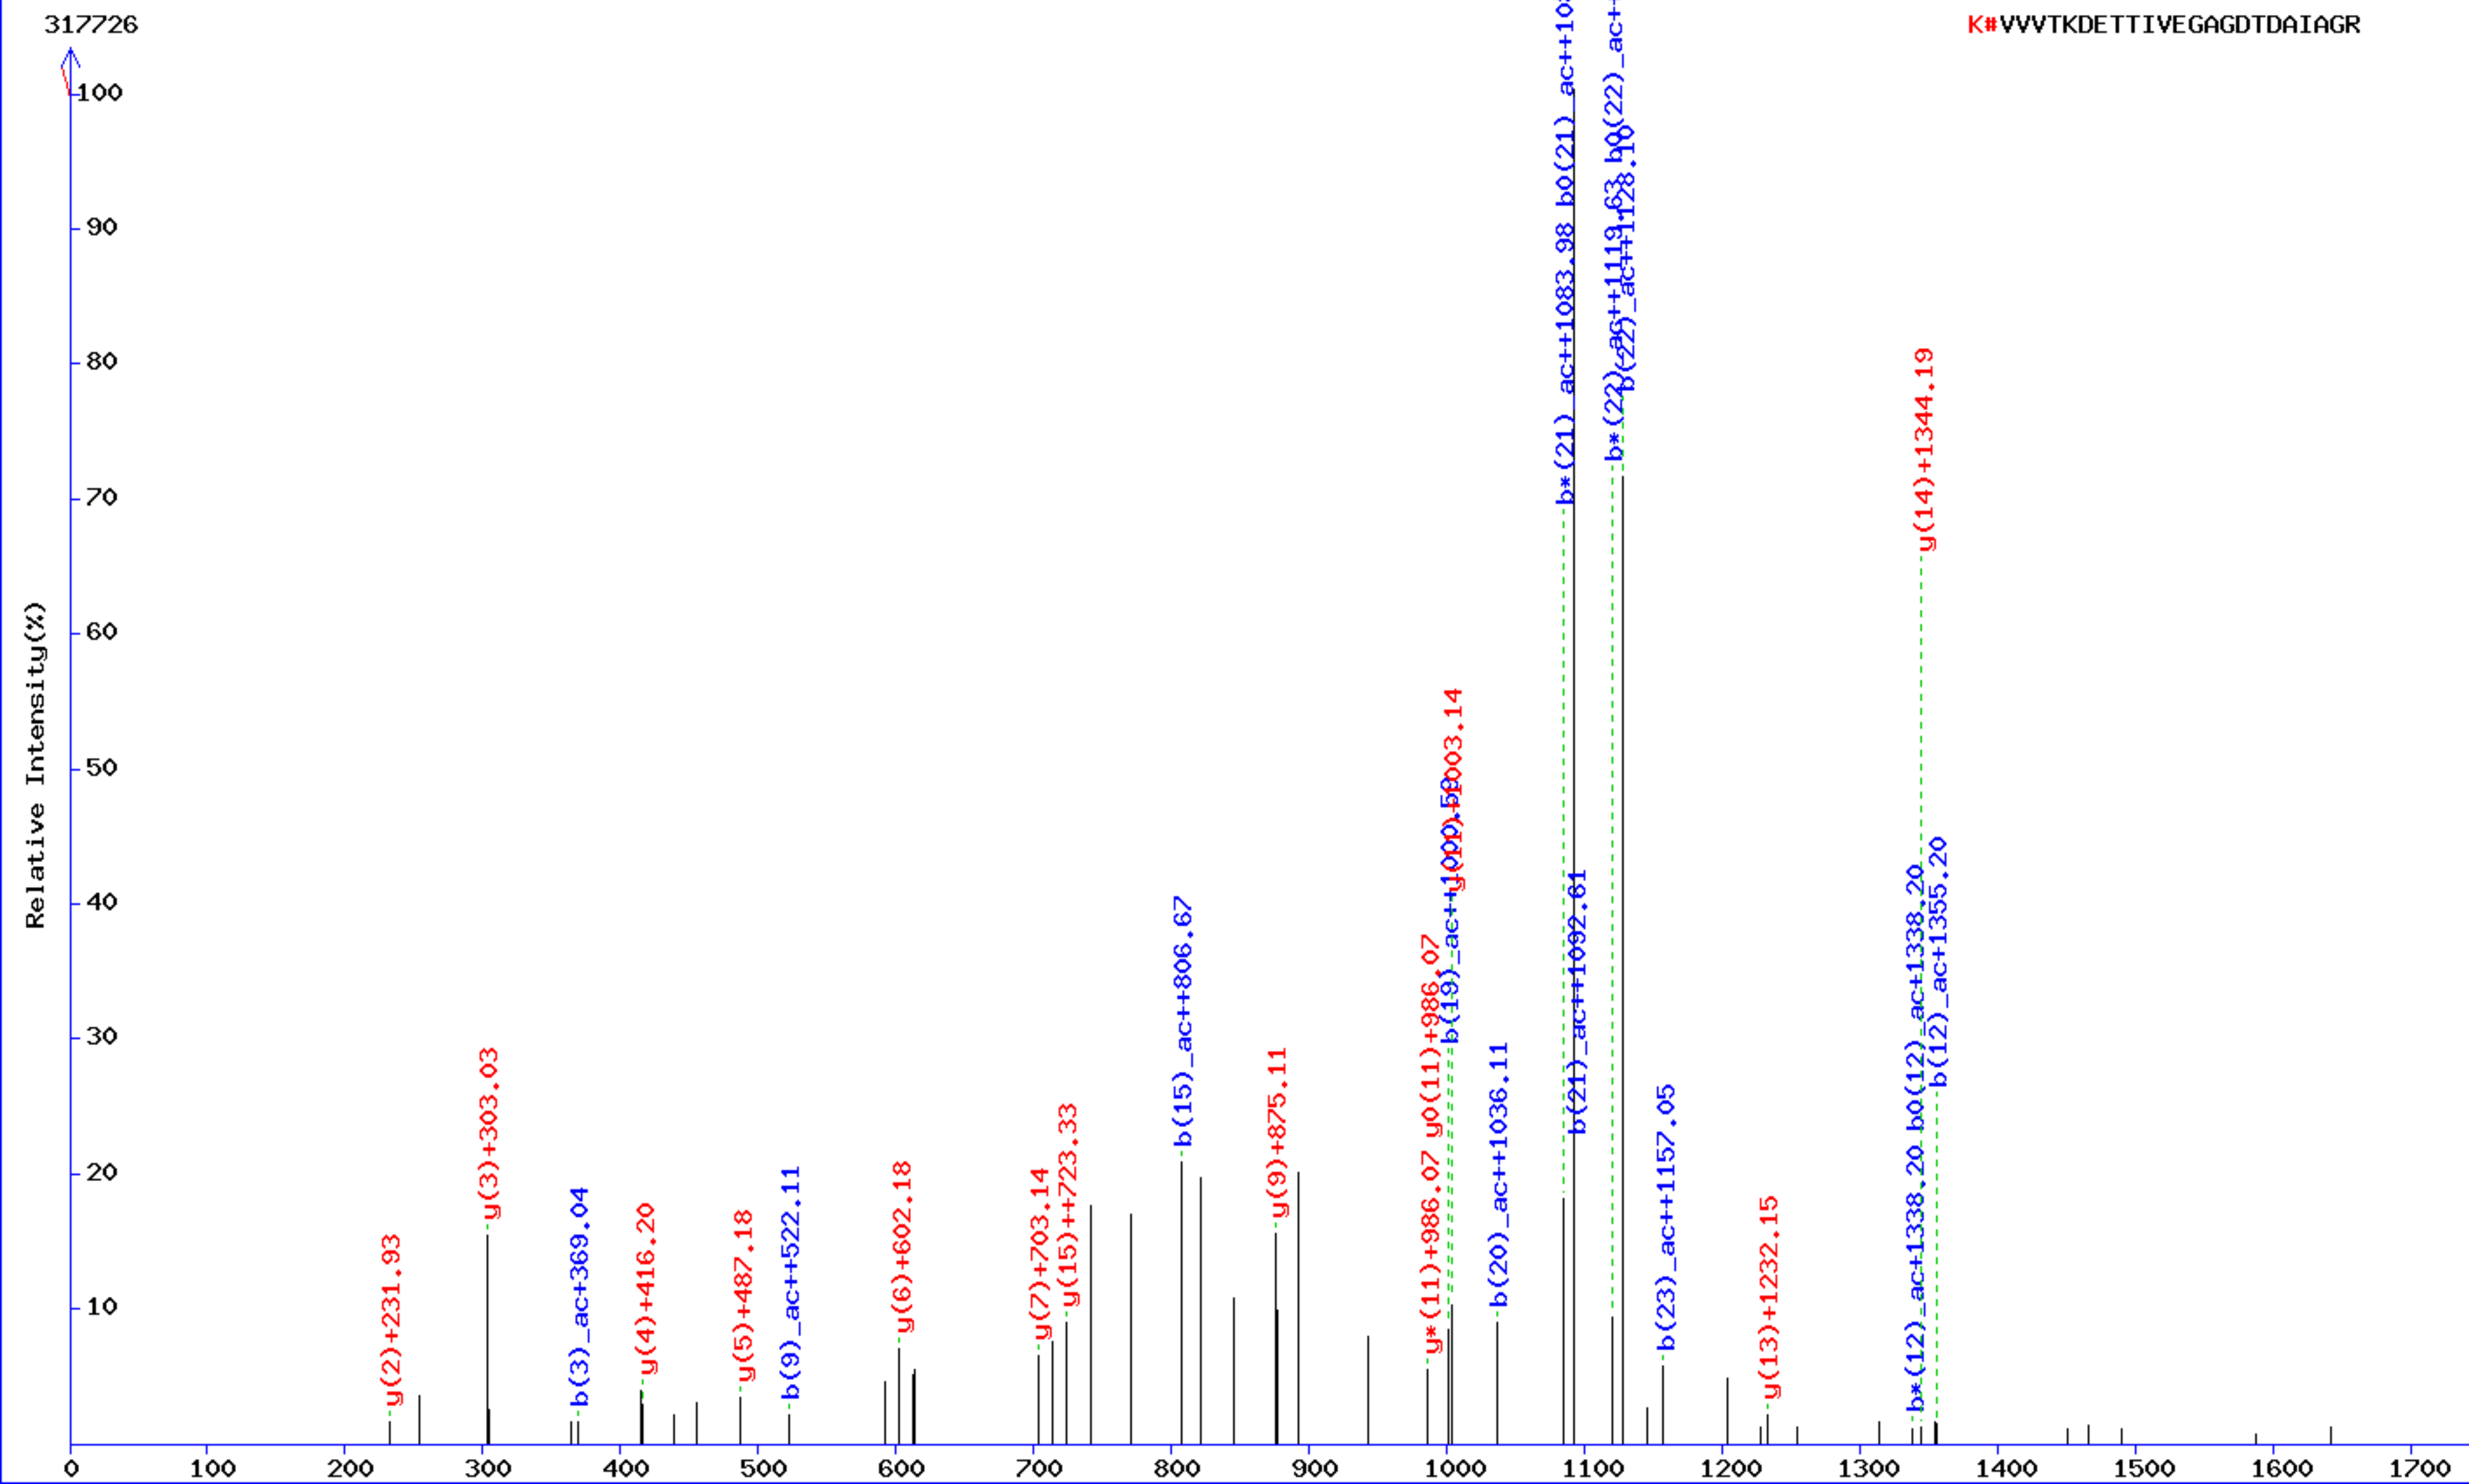



# gi|148660460 MRA\_0694 elongation factor Tu

GQVVTKPGTTTPHTEFEGQVYILSK#DEGGR

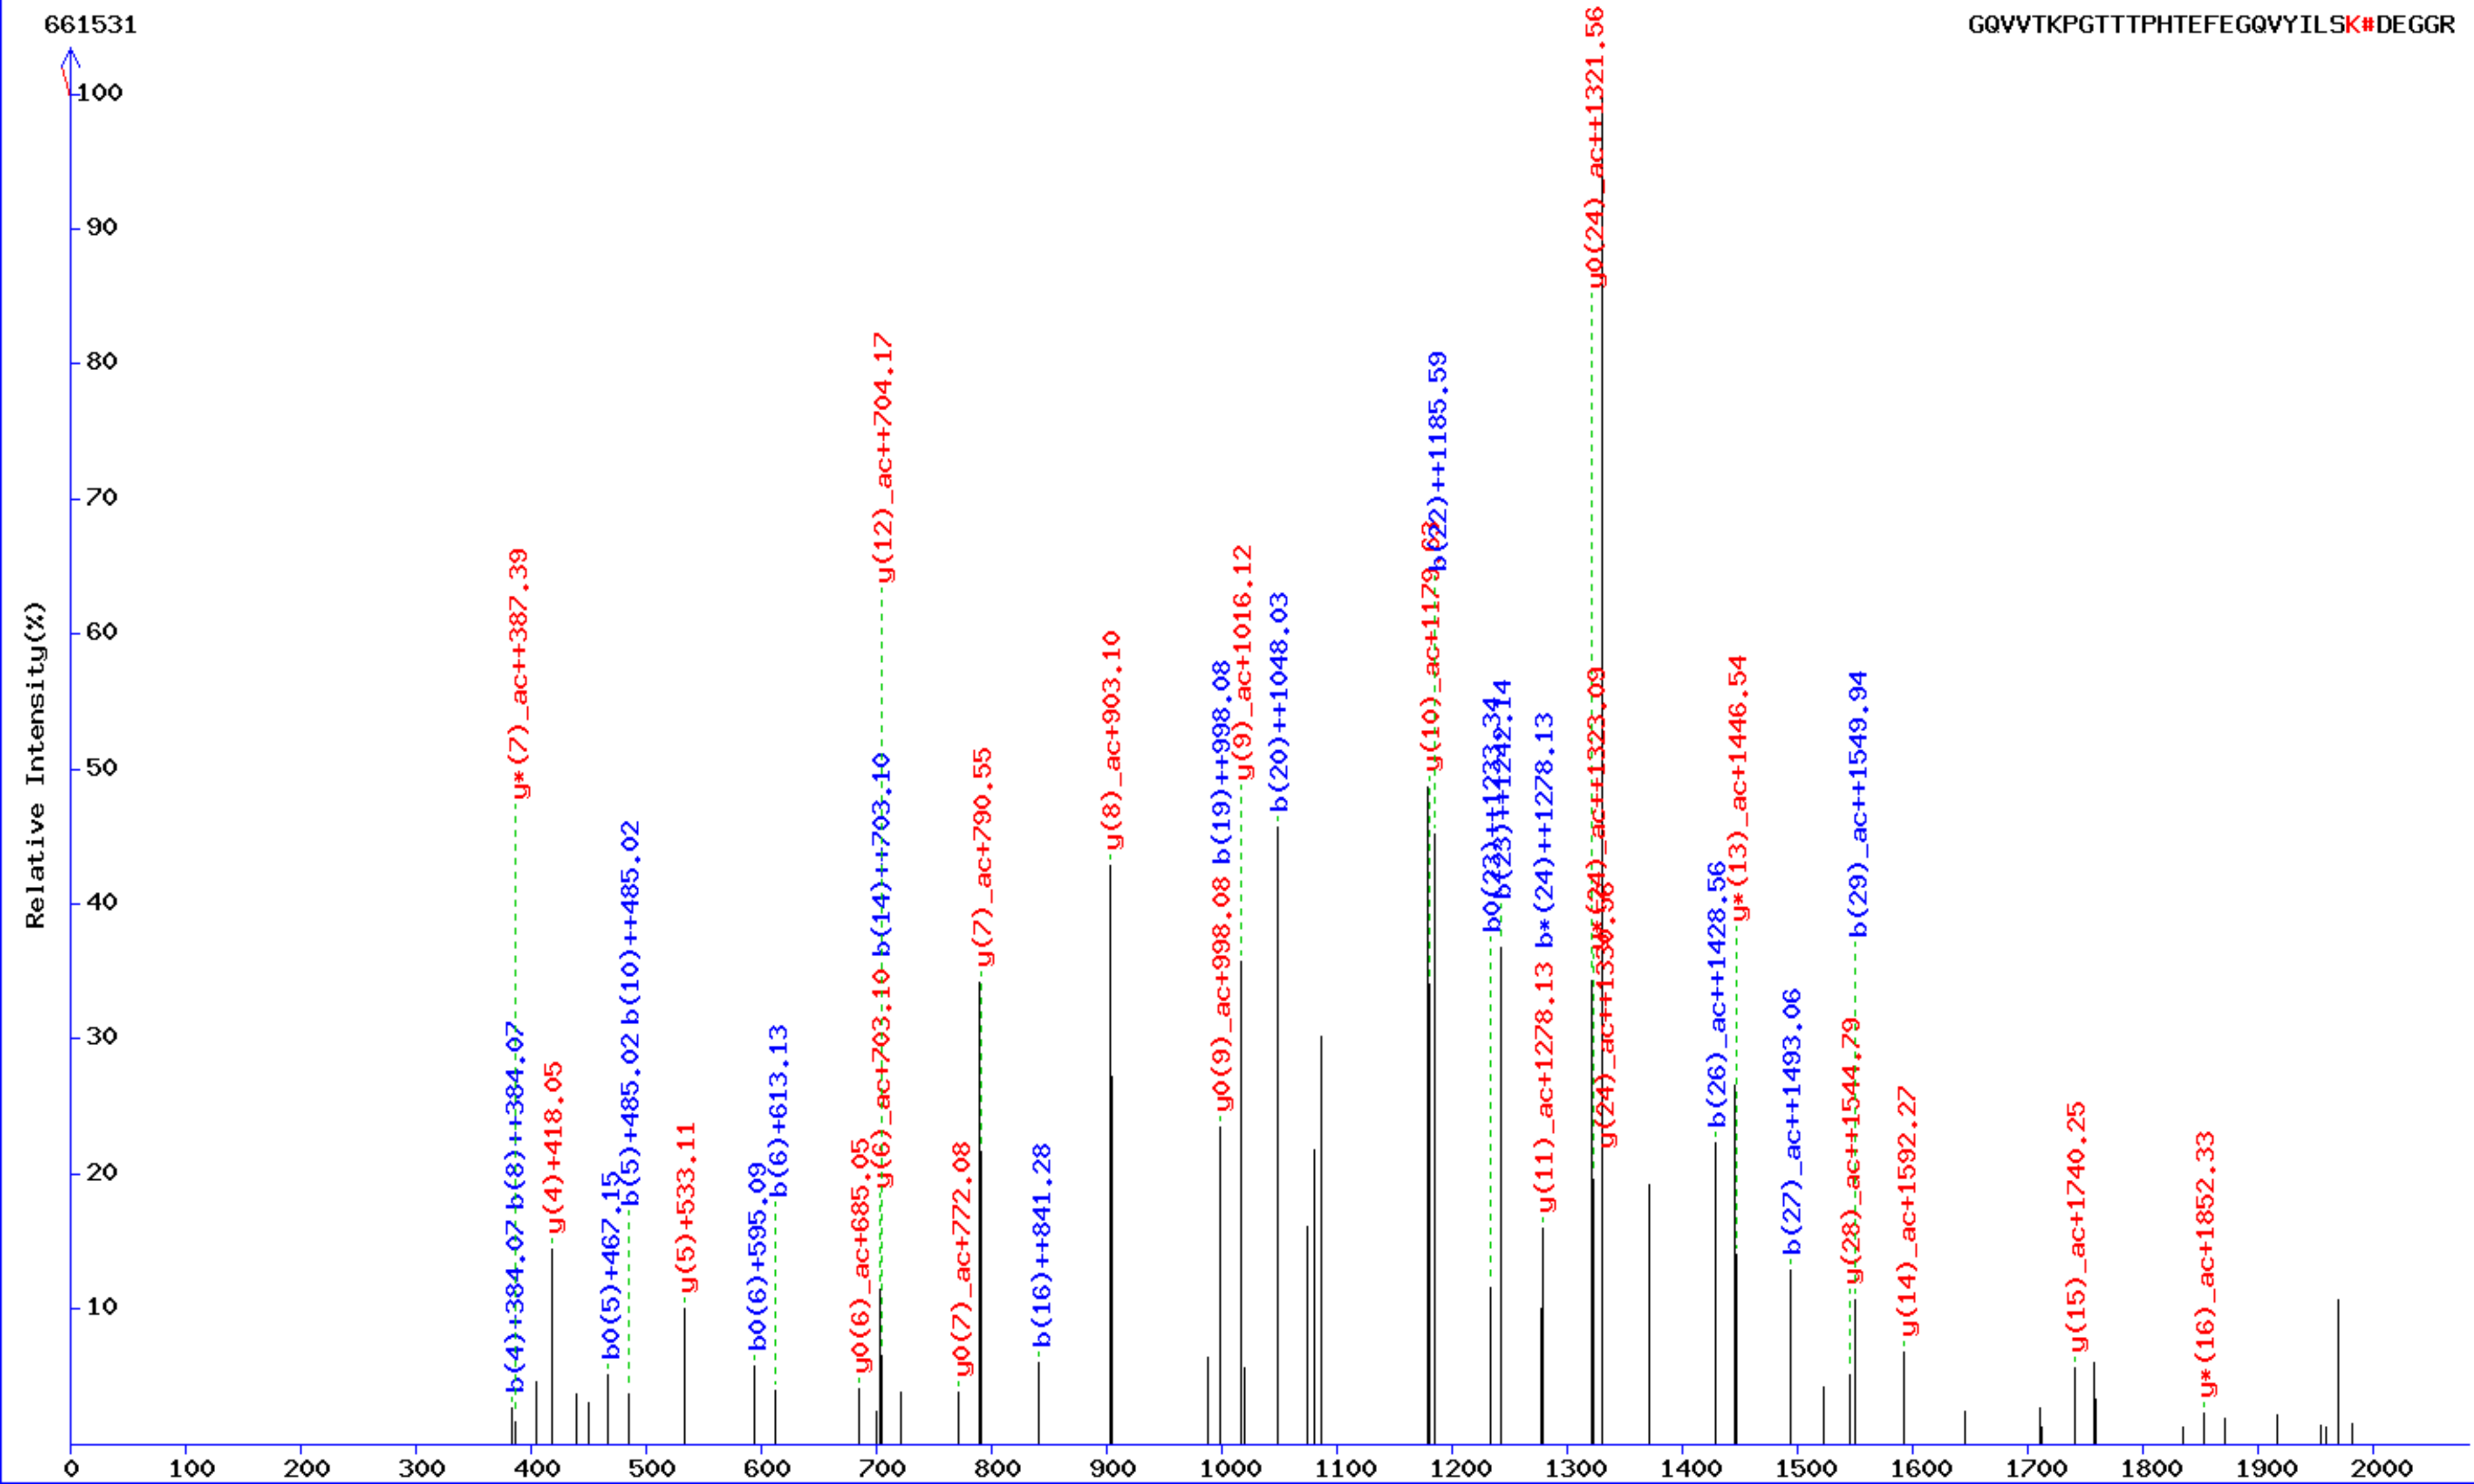

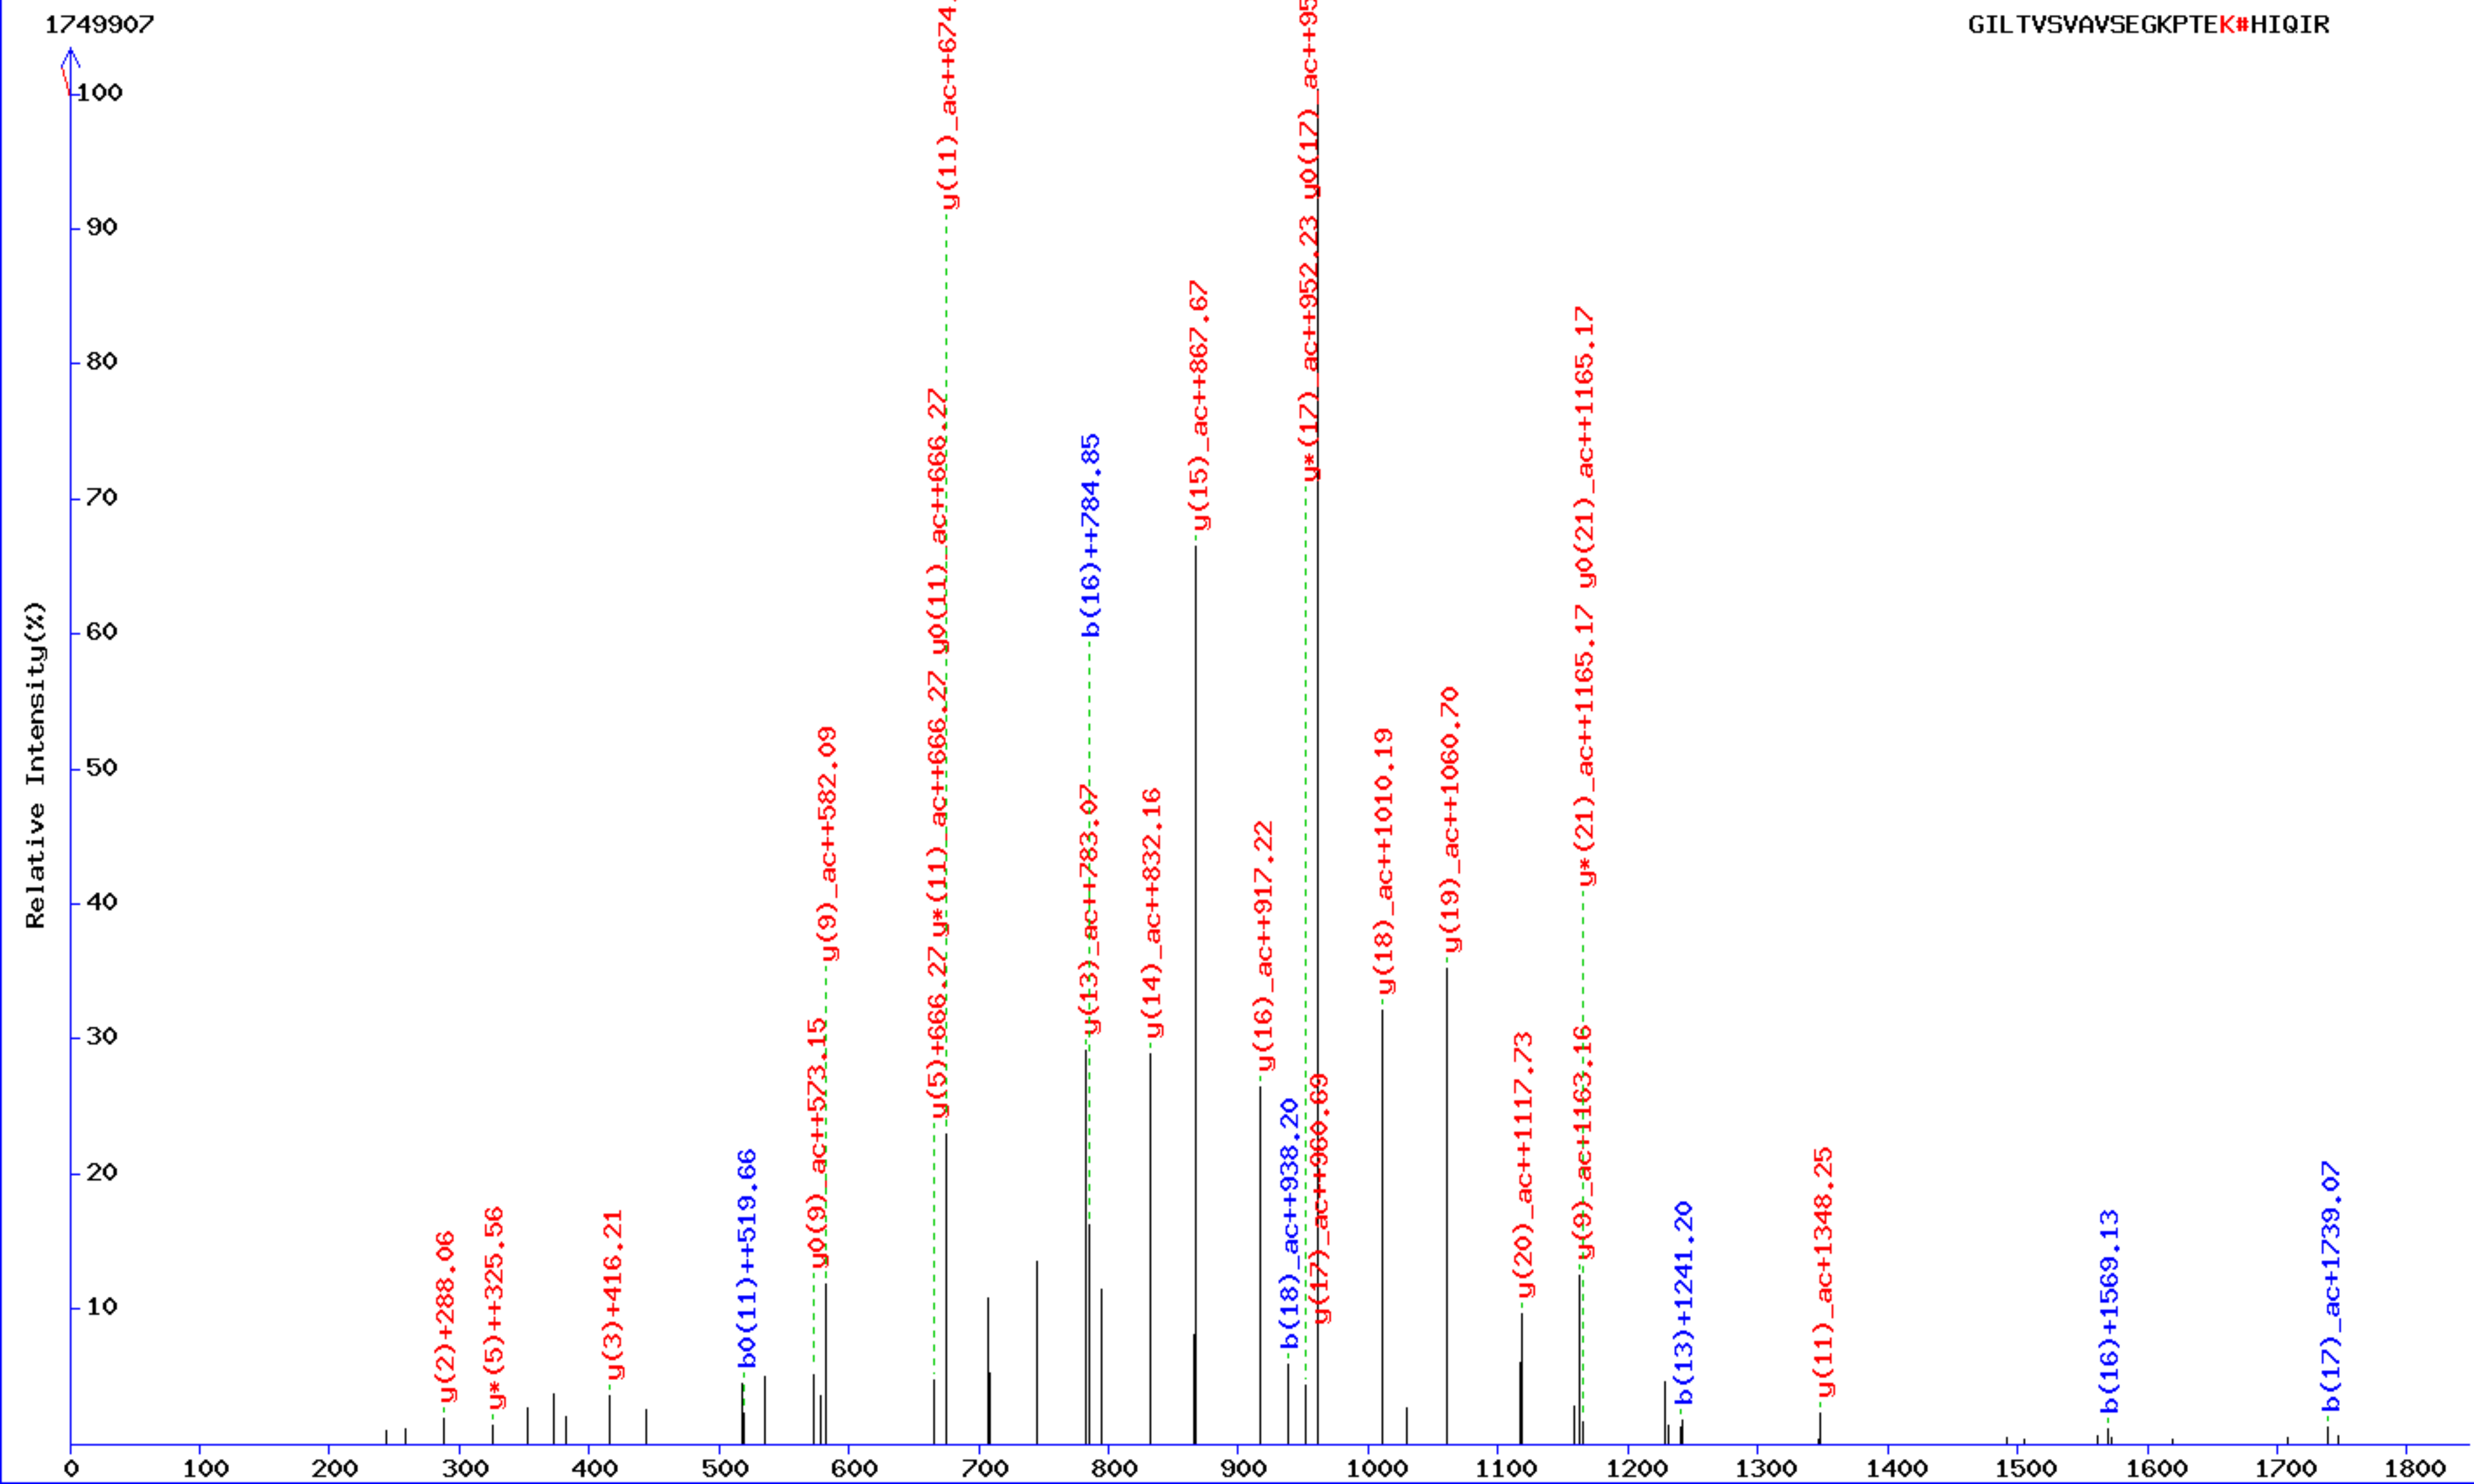

# gi|148663282 MRA\_3458 co-chaperonin GroES

RIPLDVAEGDTVIYSK#YGGTEIK

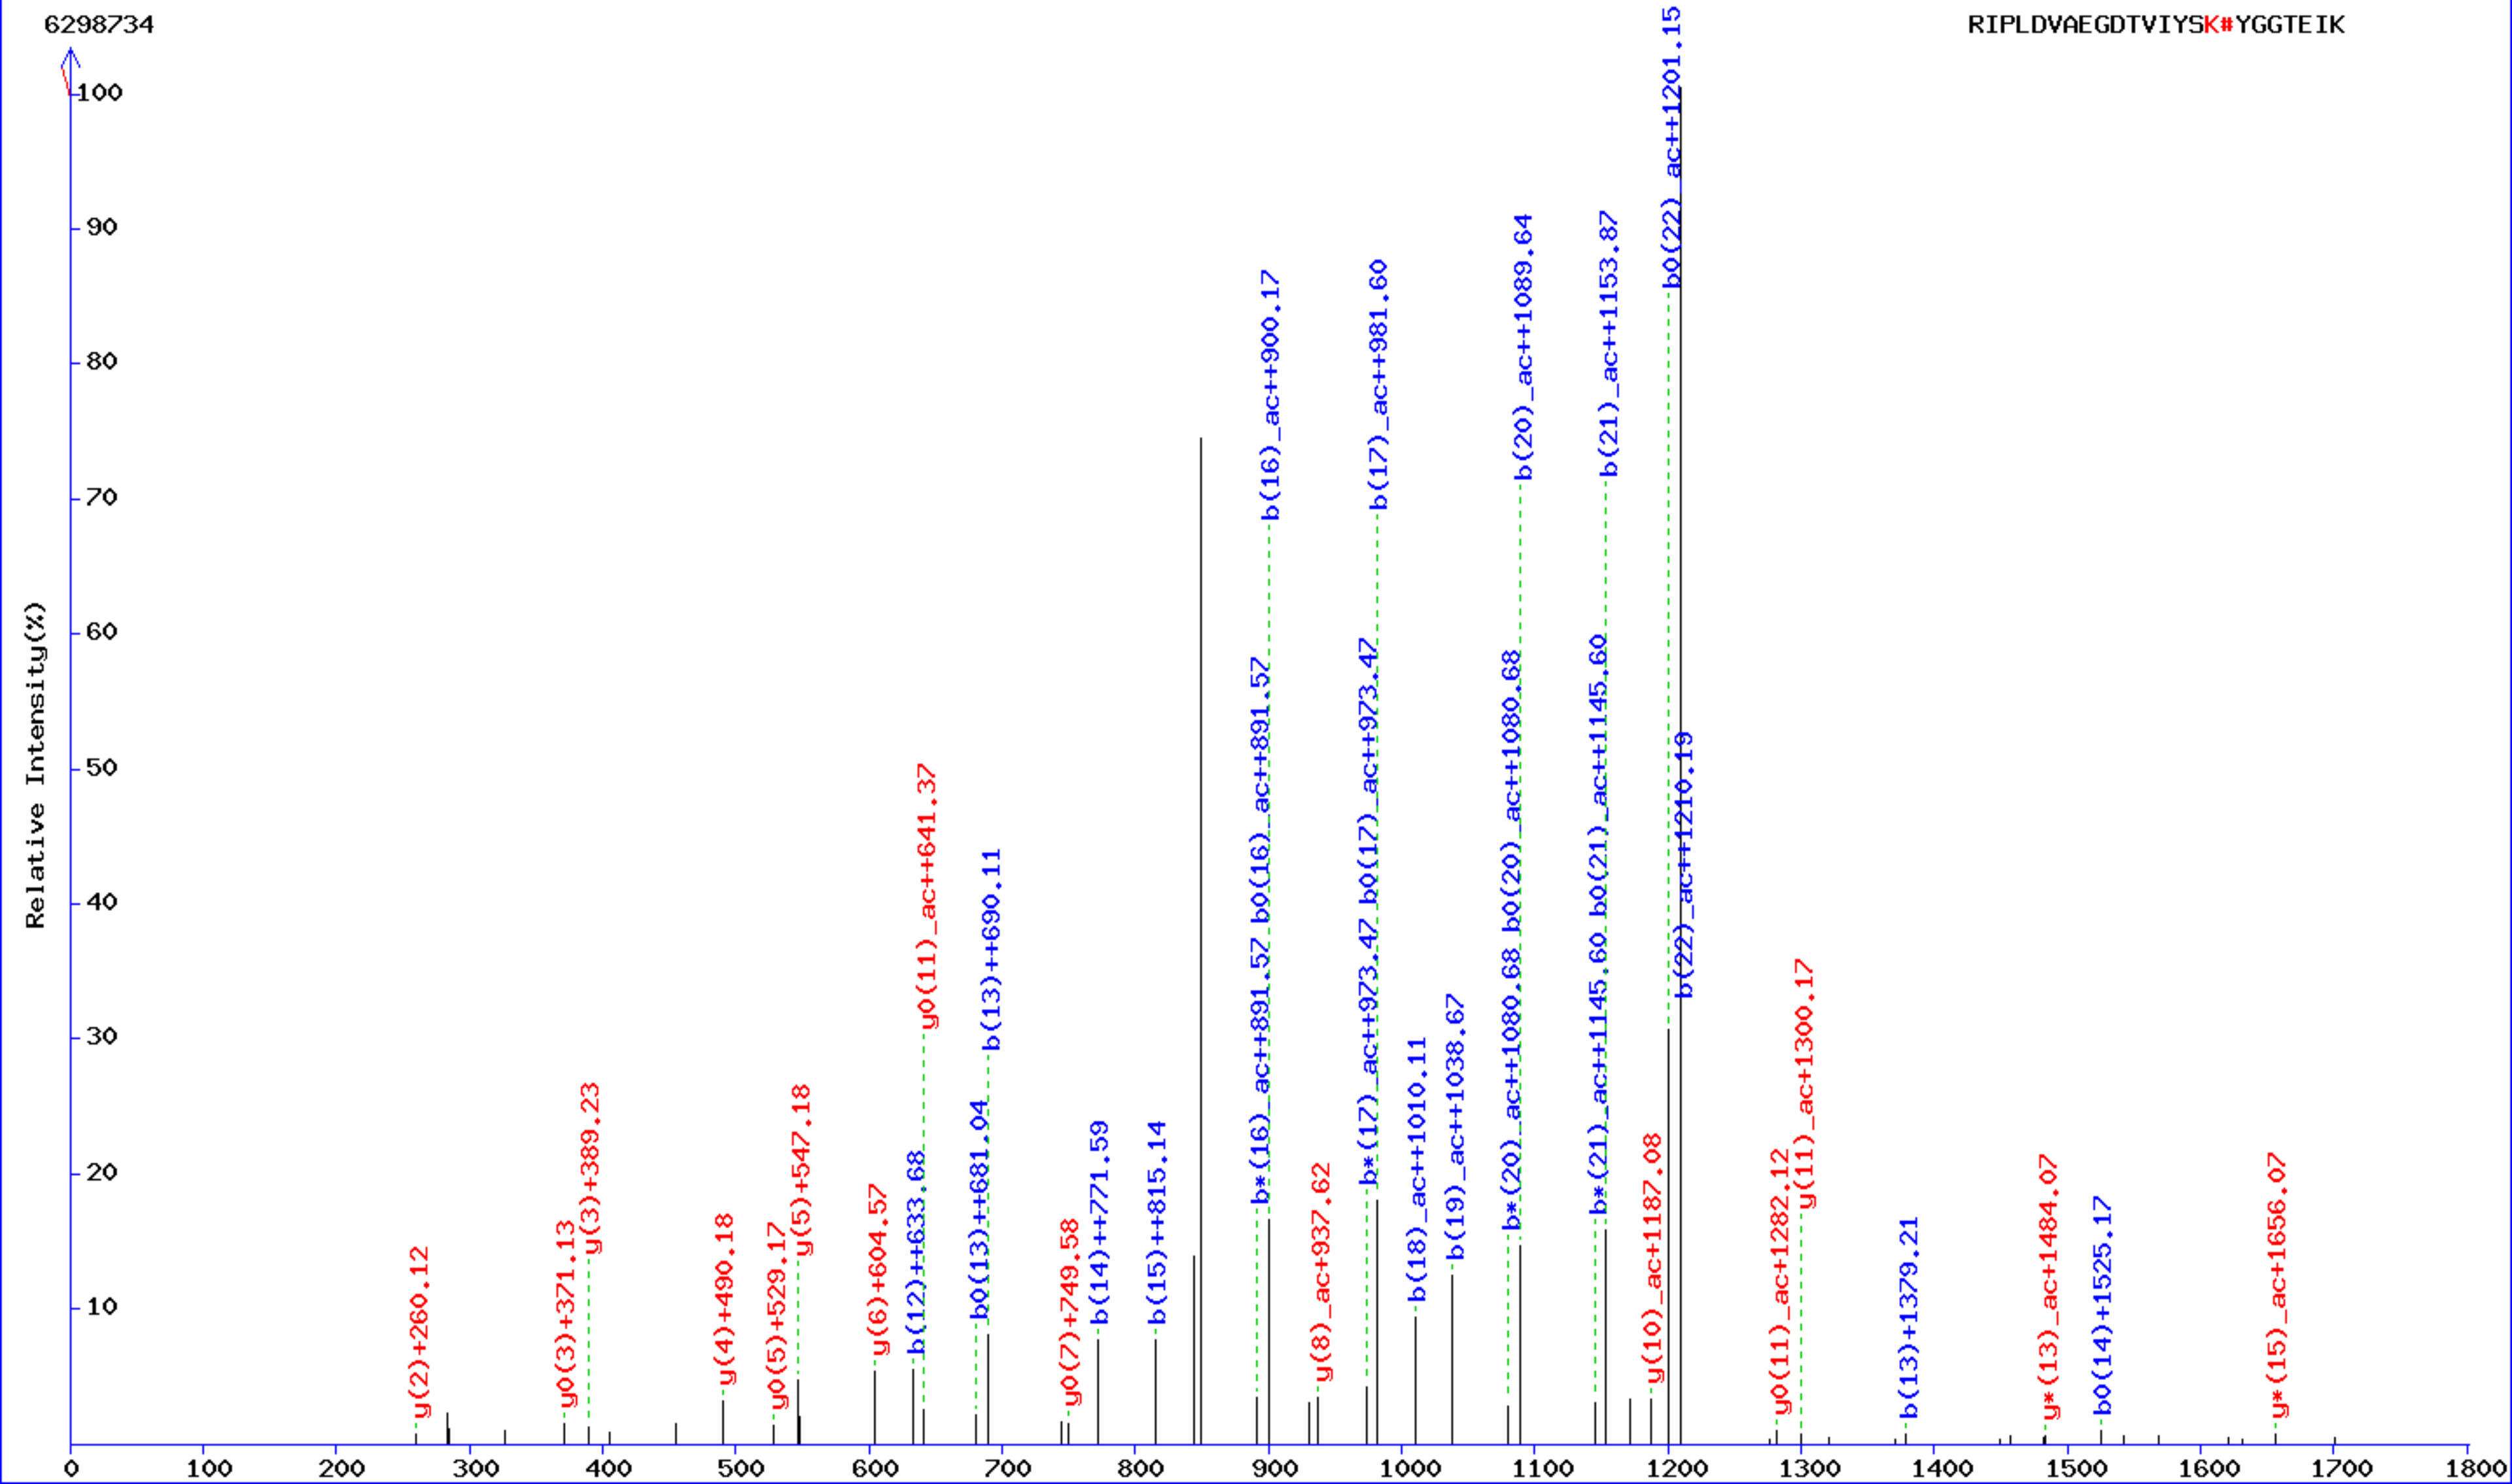

# gi|148663491 MRA\_3664 inorganic pyrophosphatase

HFFVHYK#DLEPGK

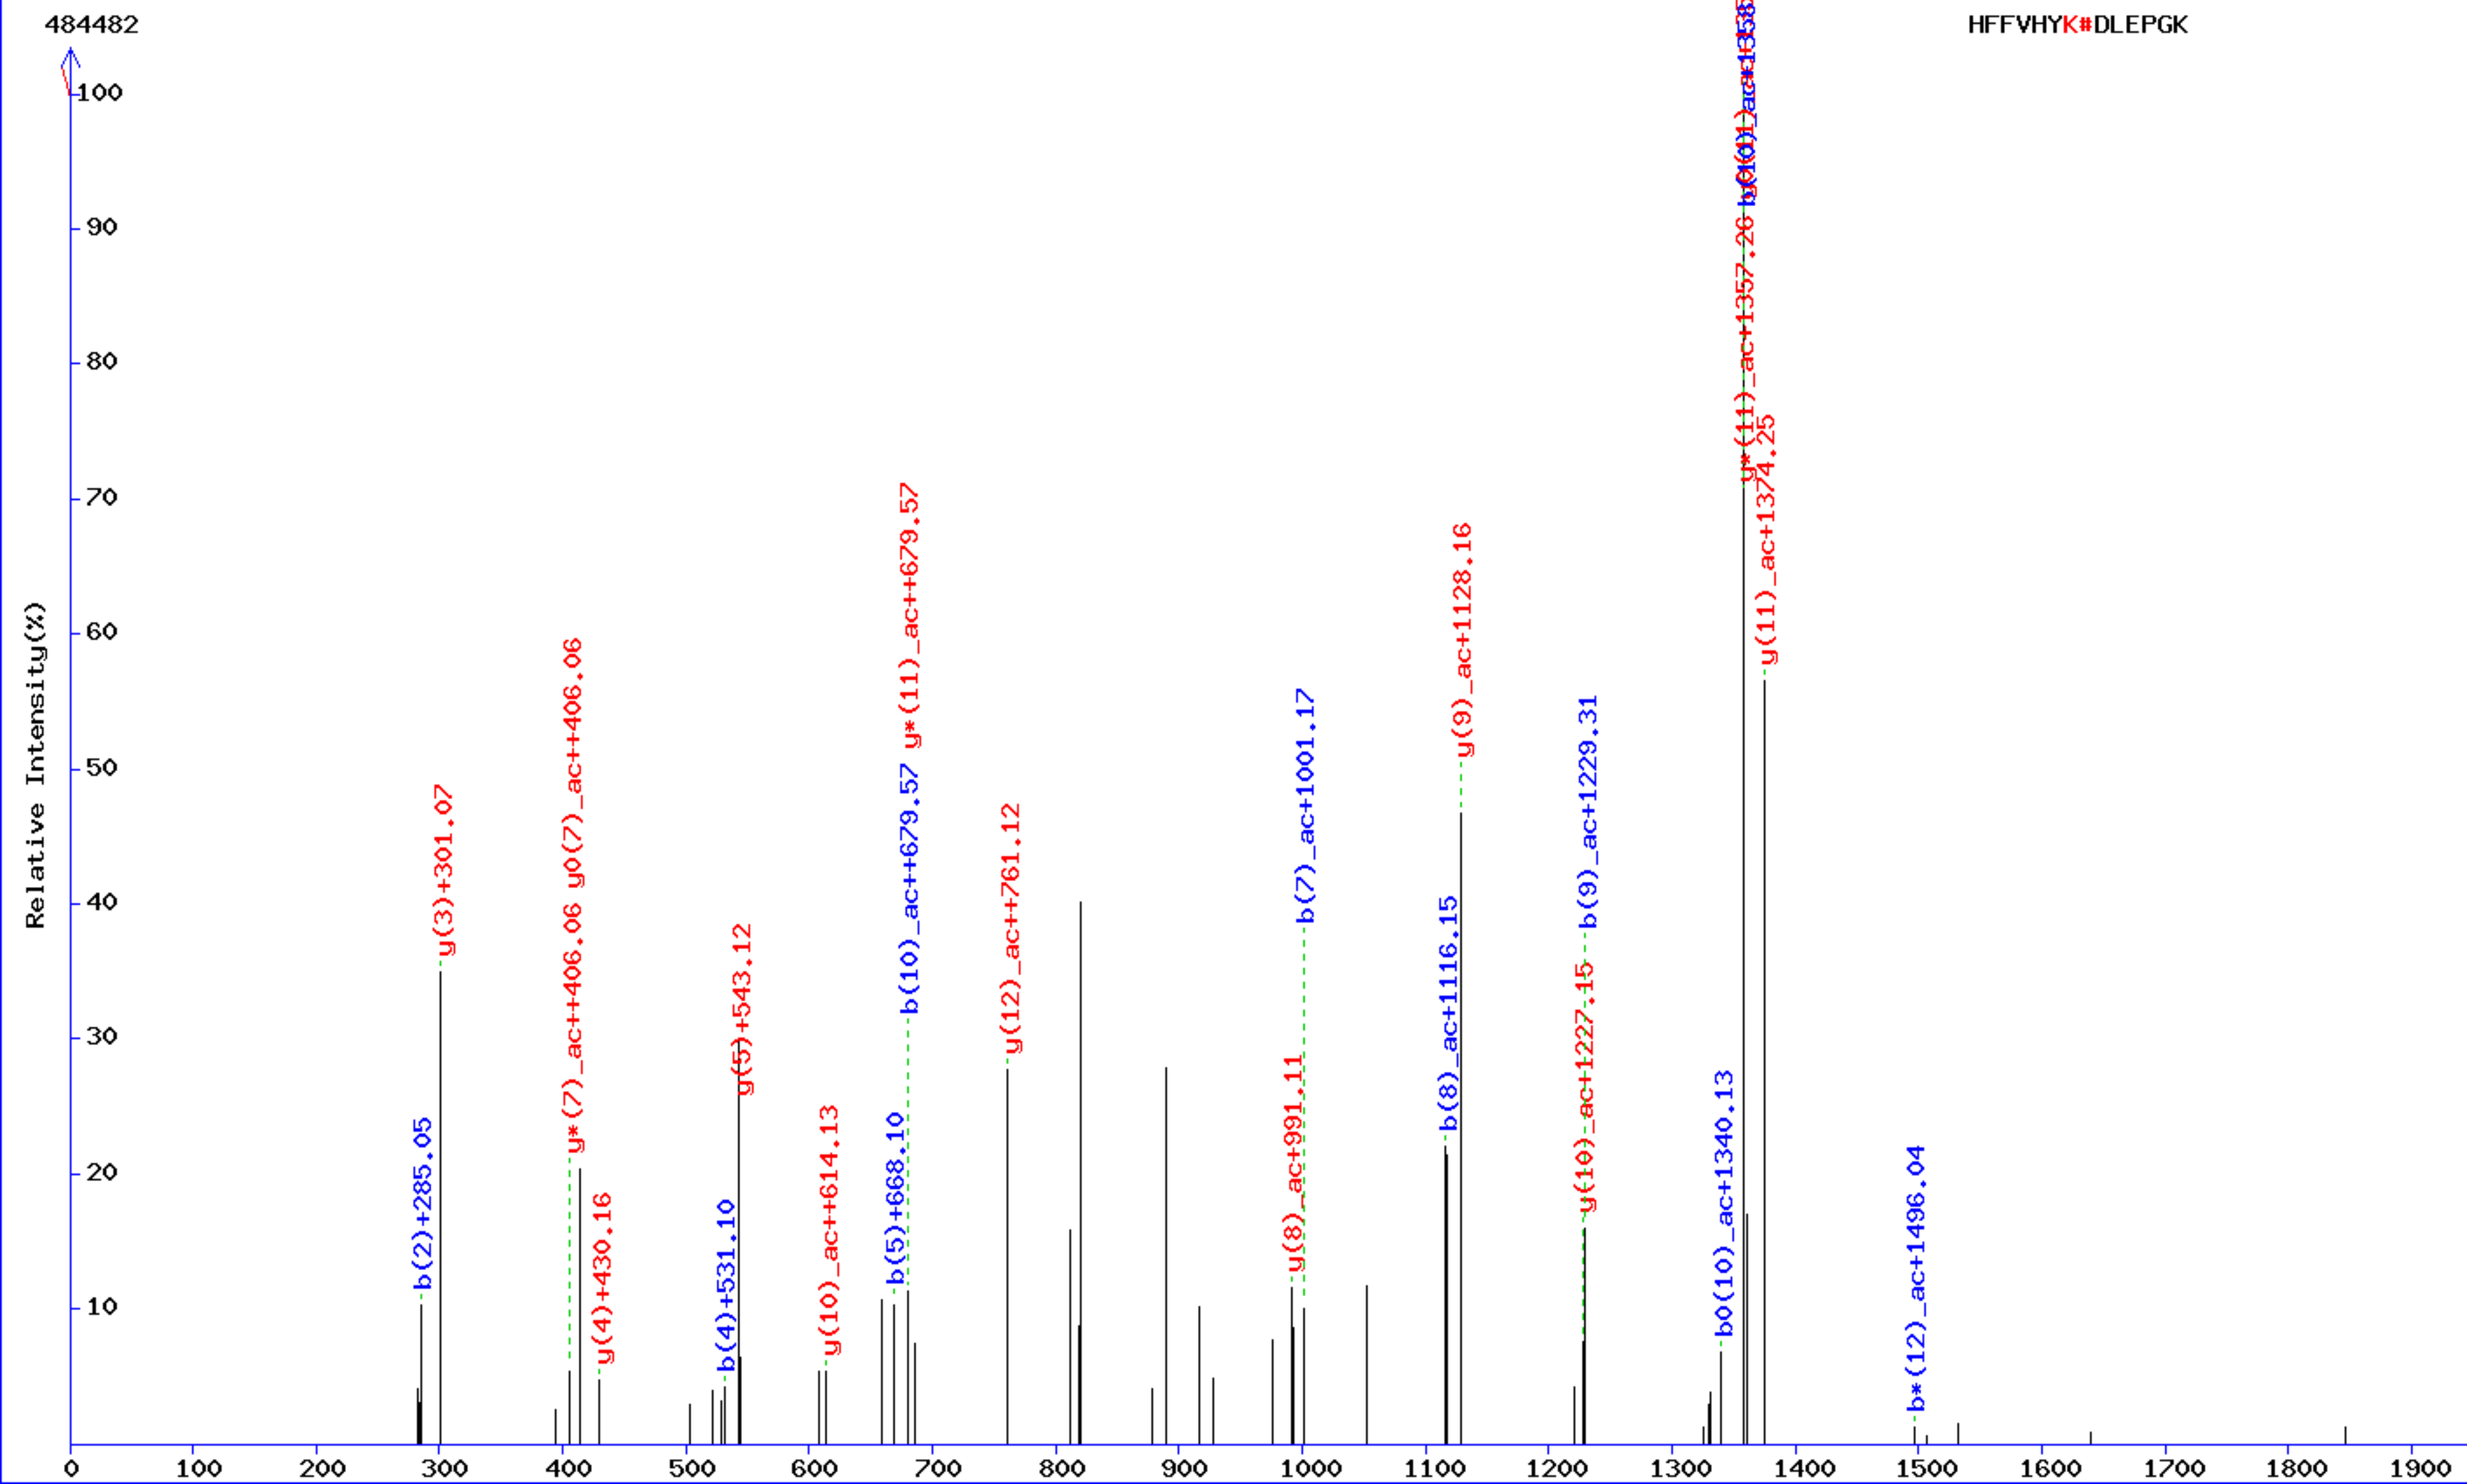

gi|148660637 MRA\_0868 fatty oxidation complex subunit alpha

AGYEVVLK#DVSLEAAK

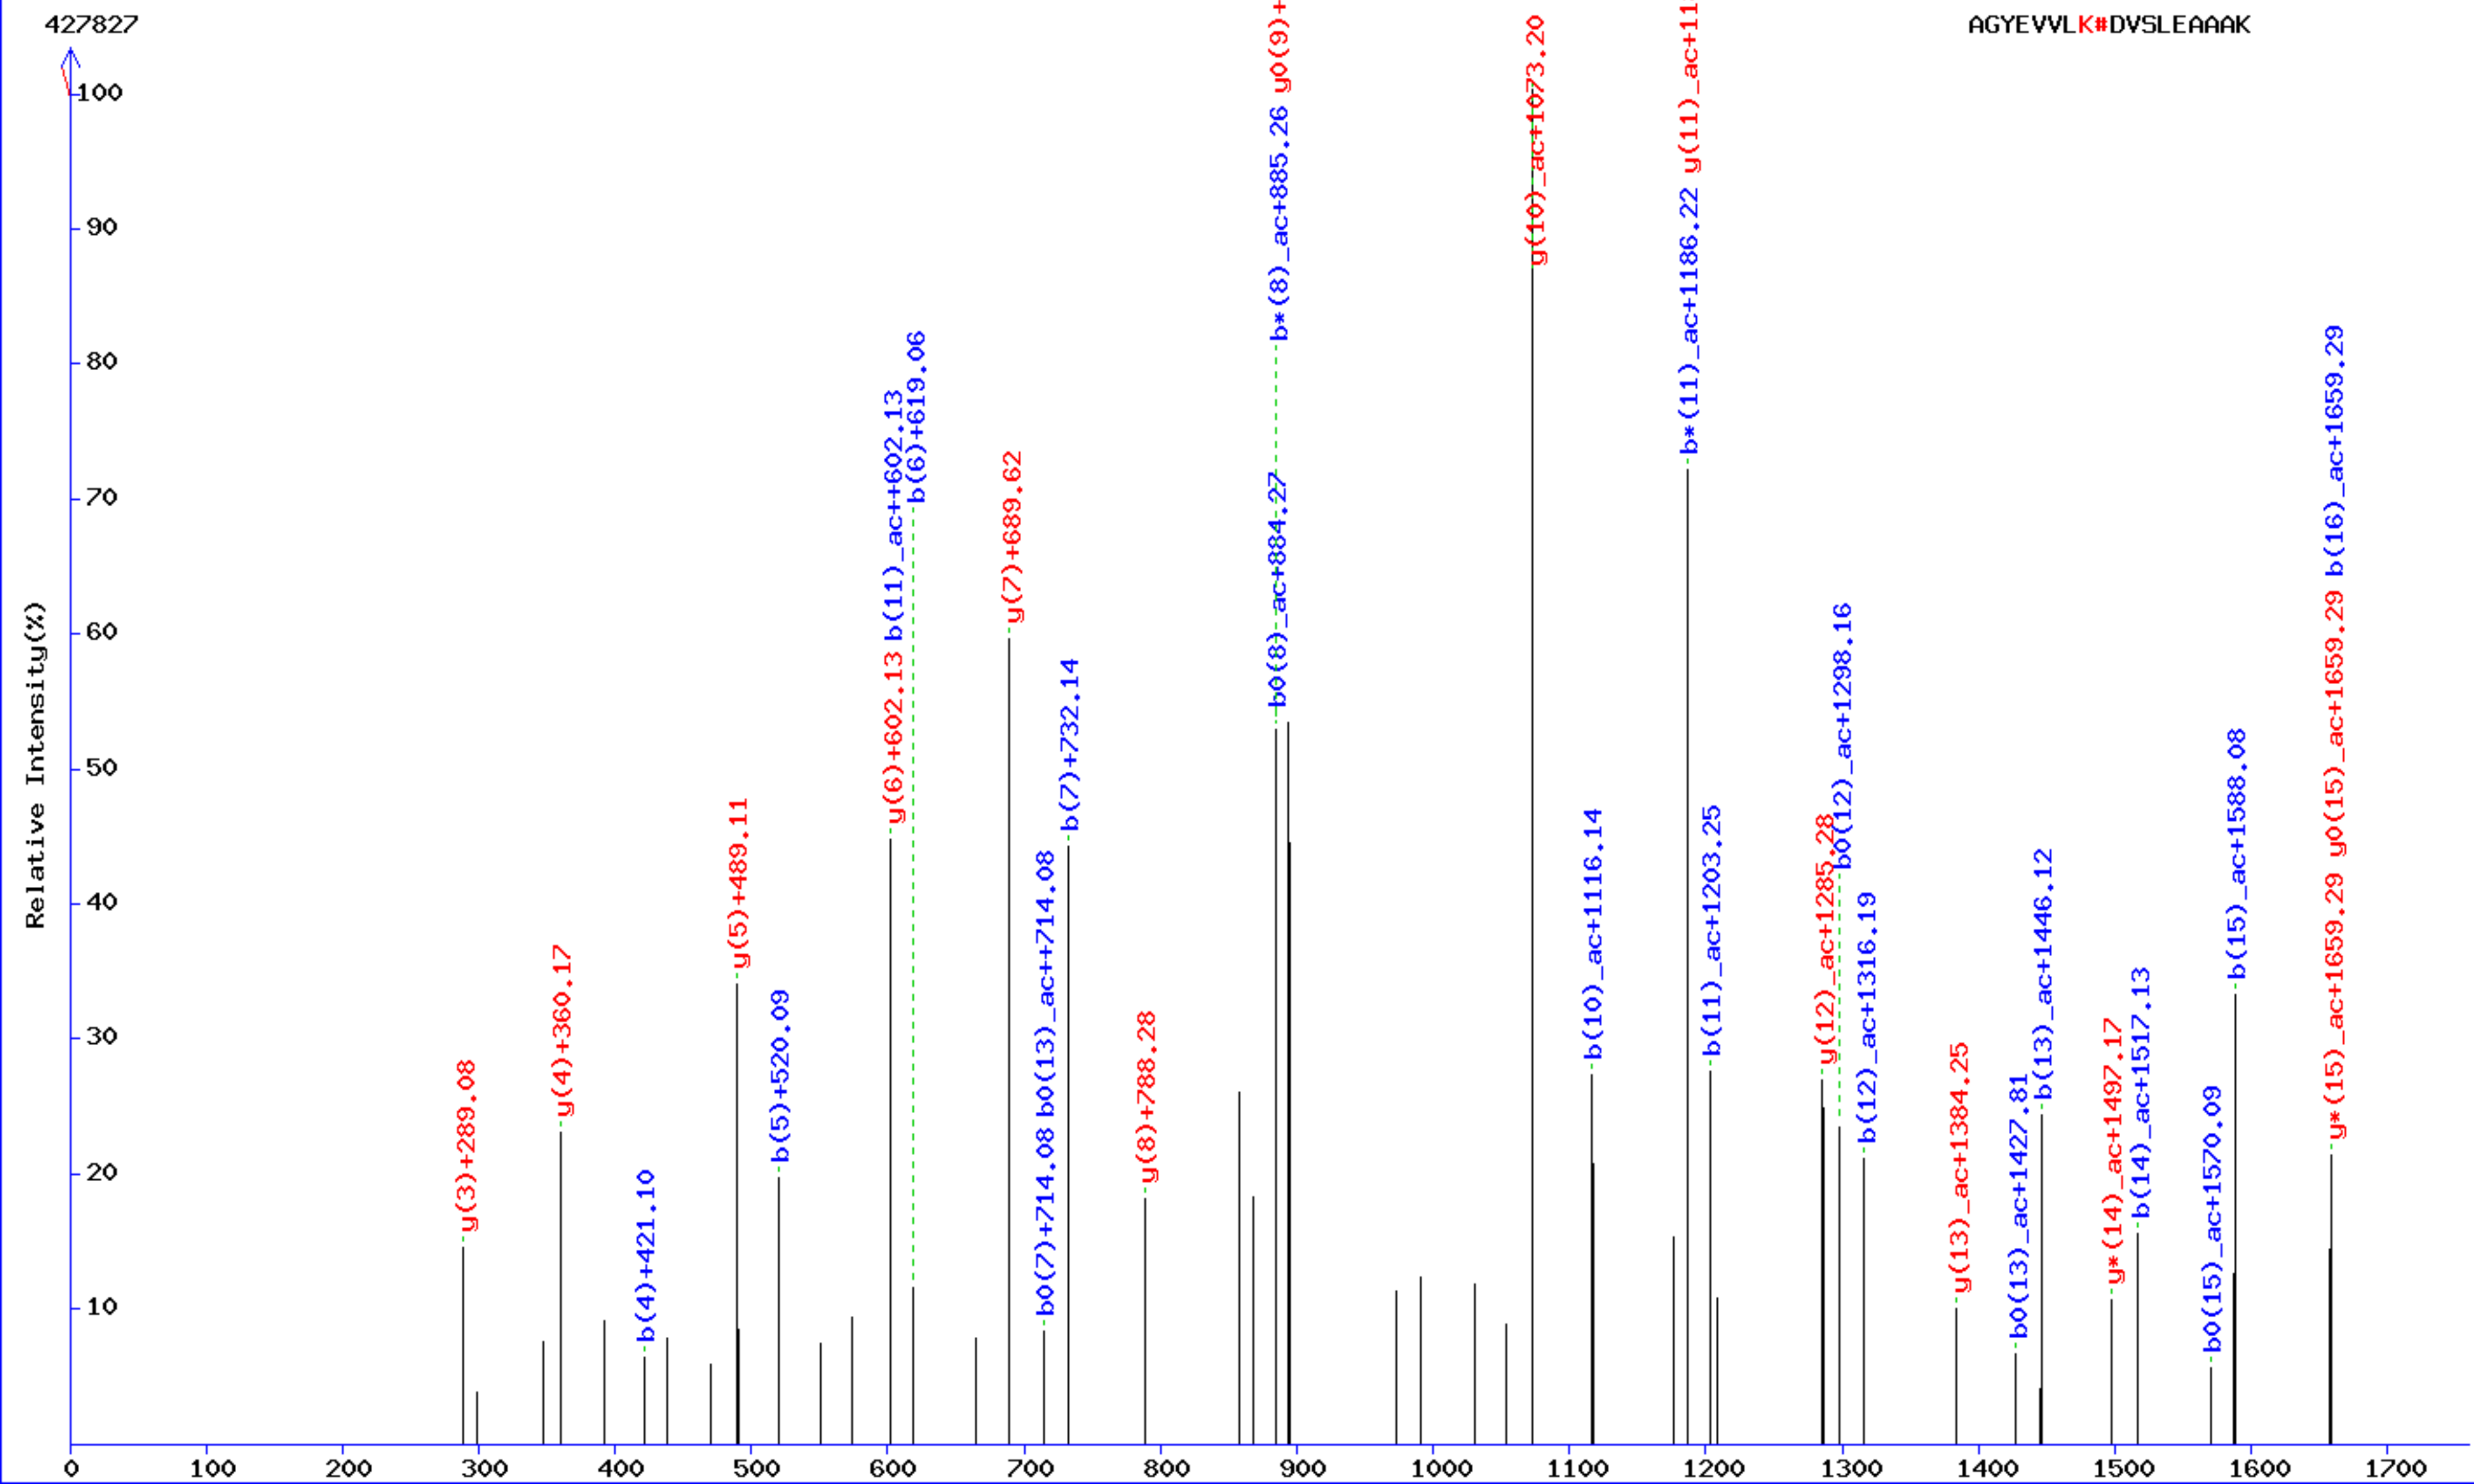

# gi|148662987 MRA\_3165 two component transcriptional regulatory protein DevR

MFLAEKTVK#NYVSR

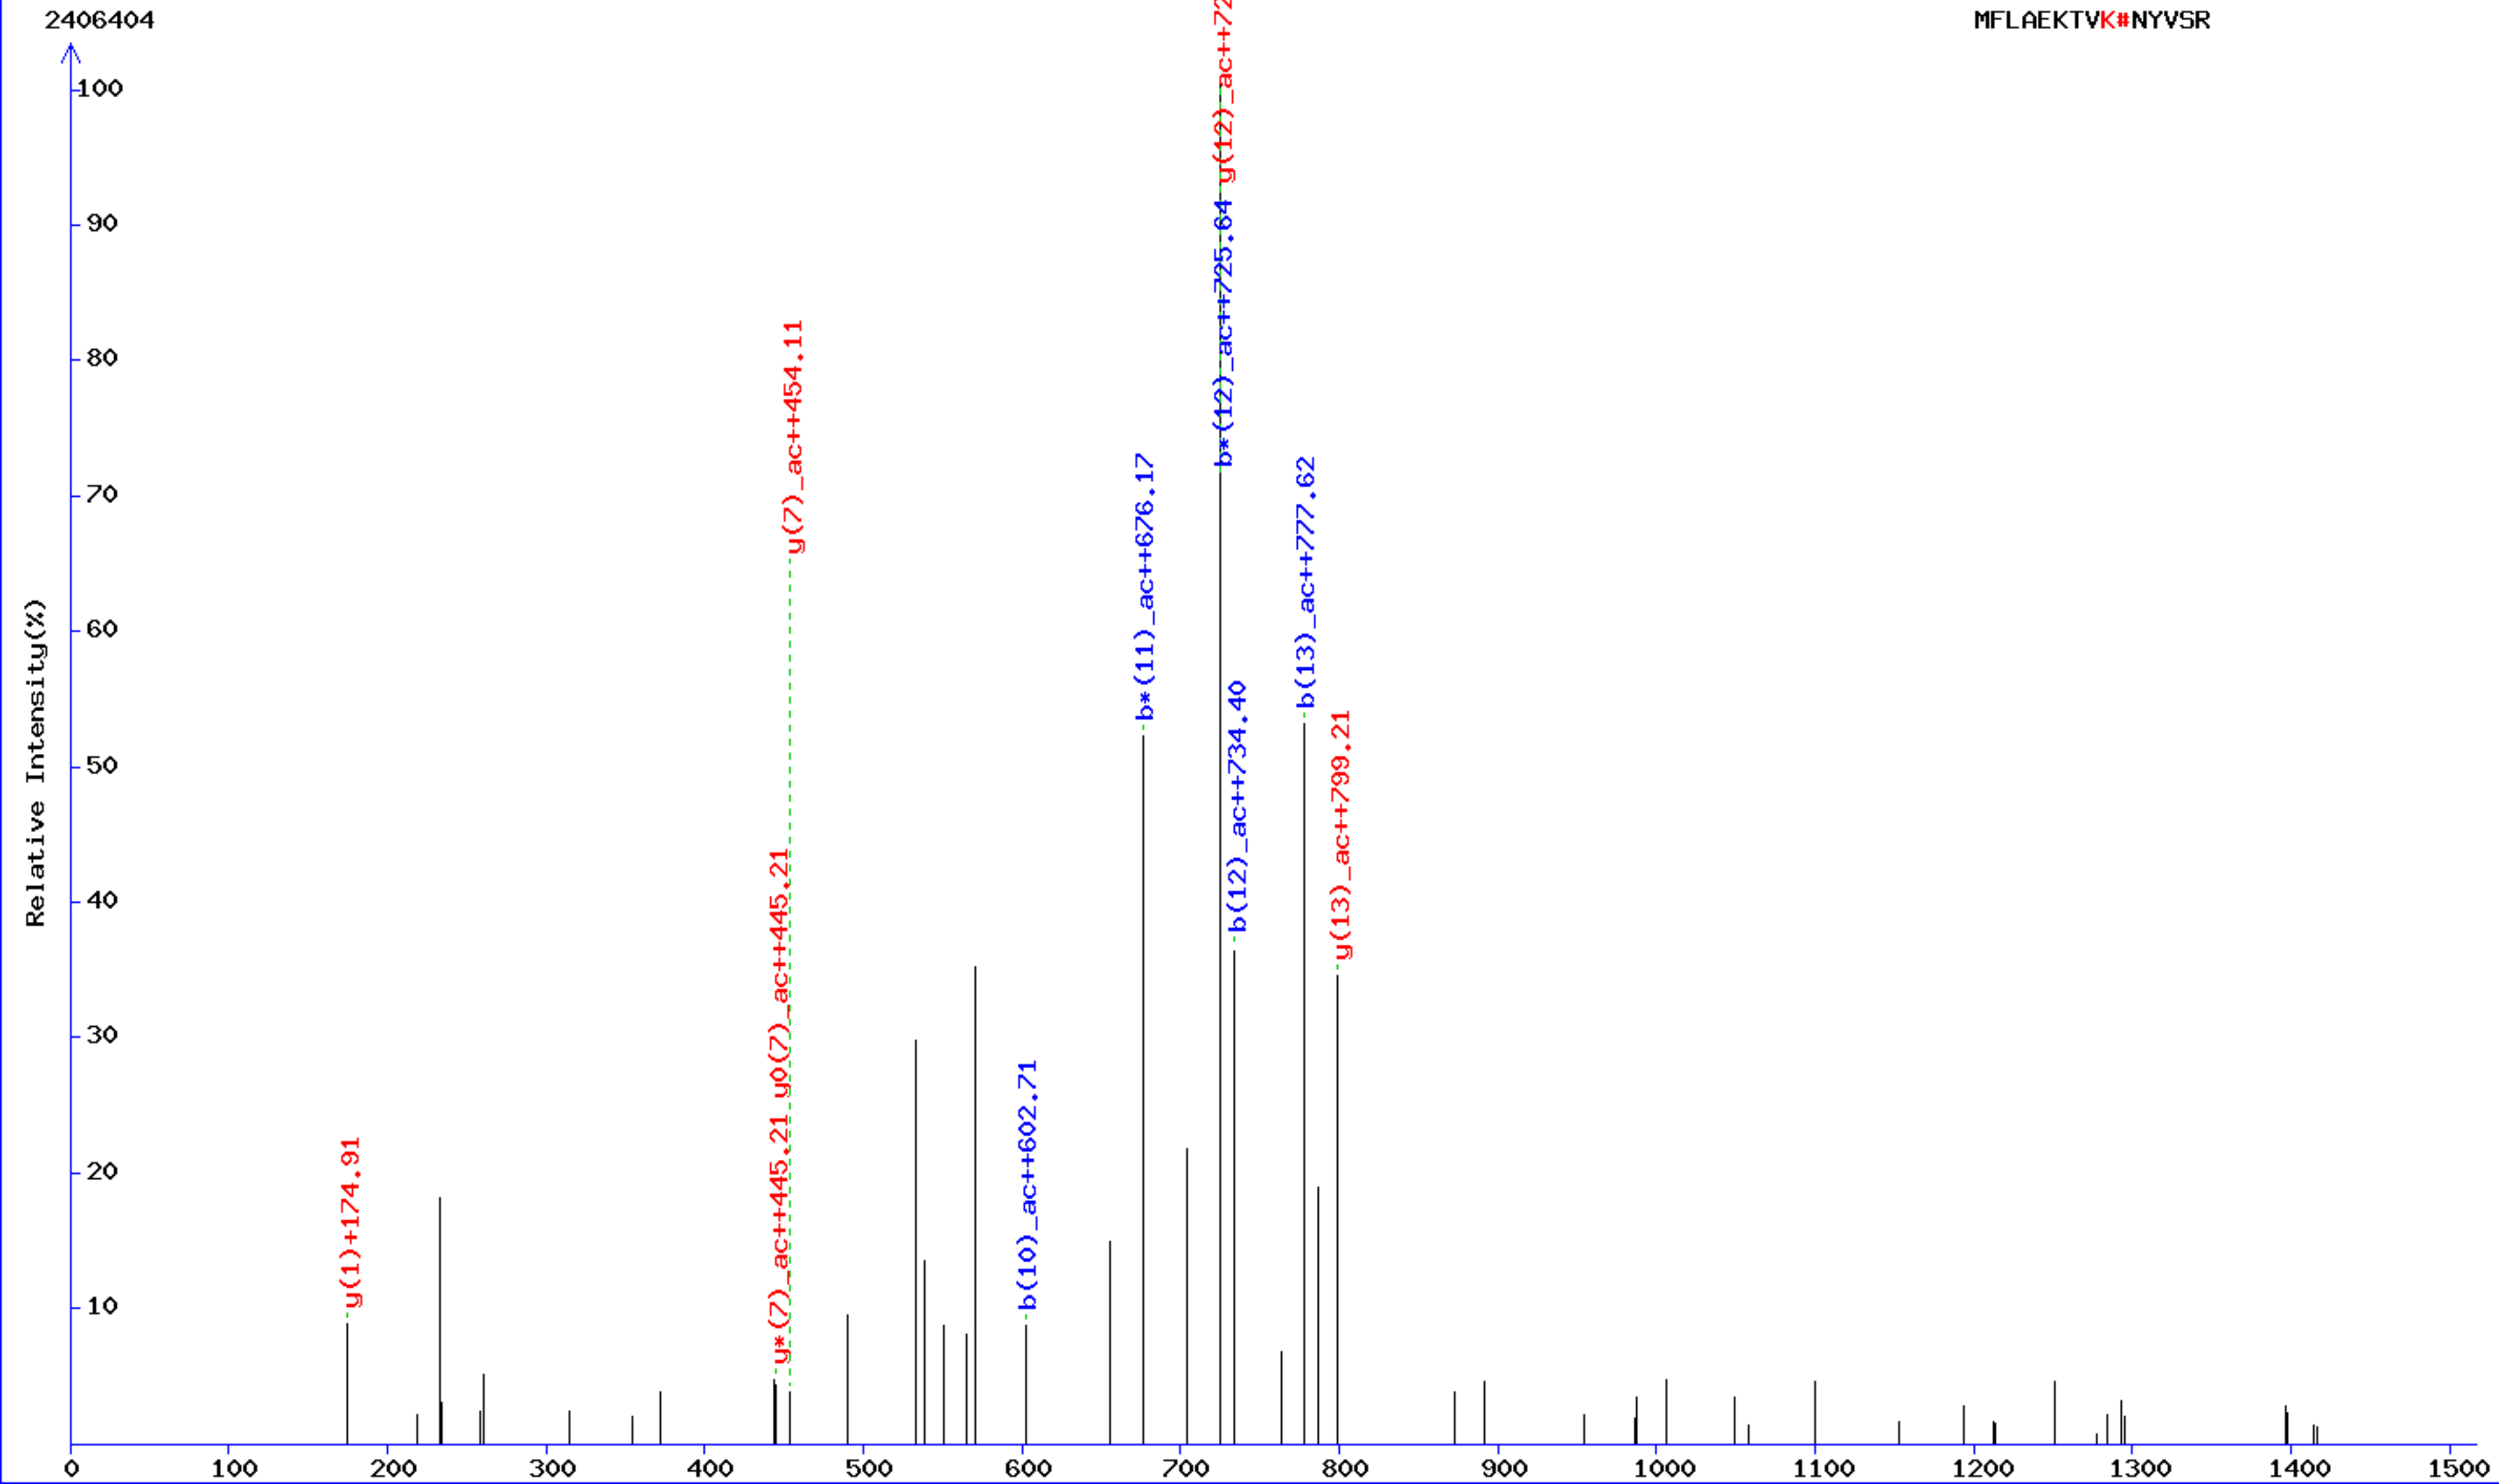

# gi|148660475 MRA\_0708 30S ribosomal protein S10

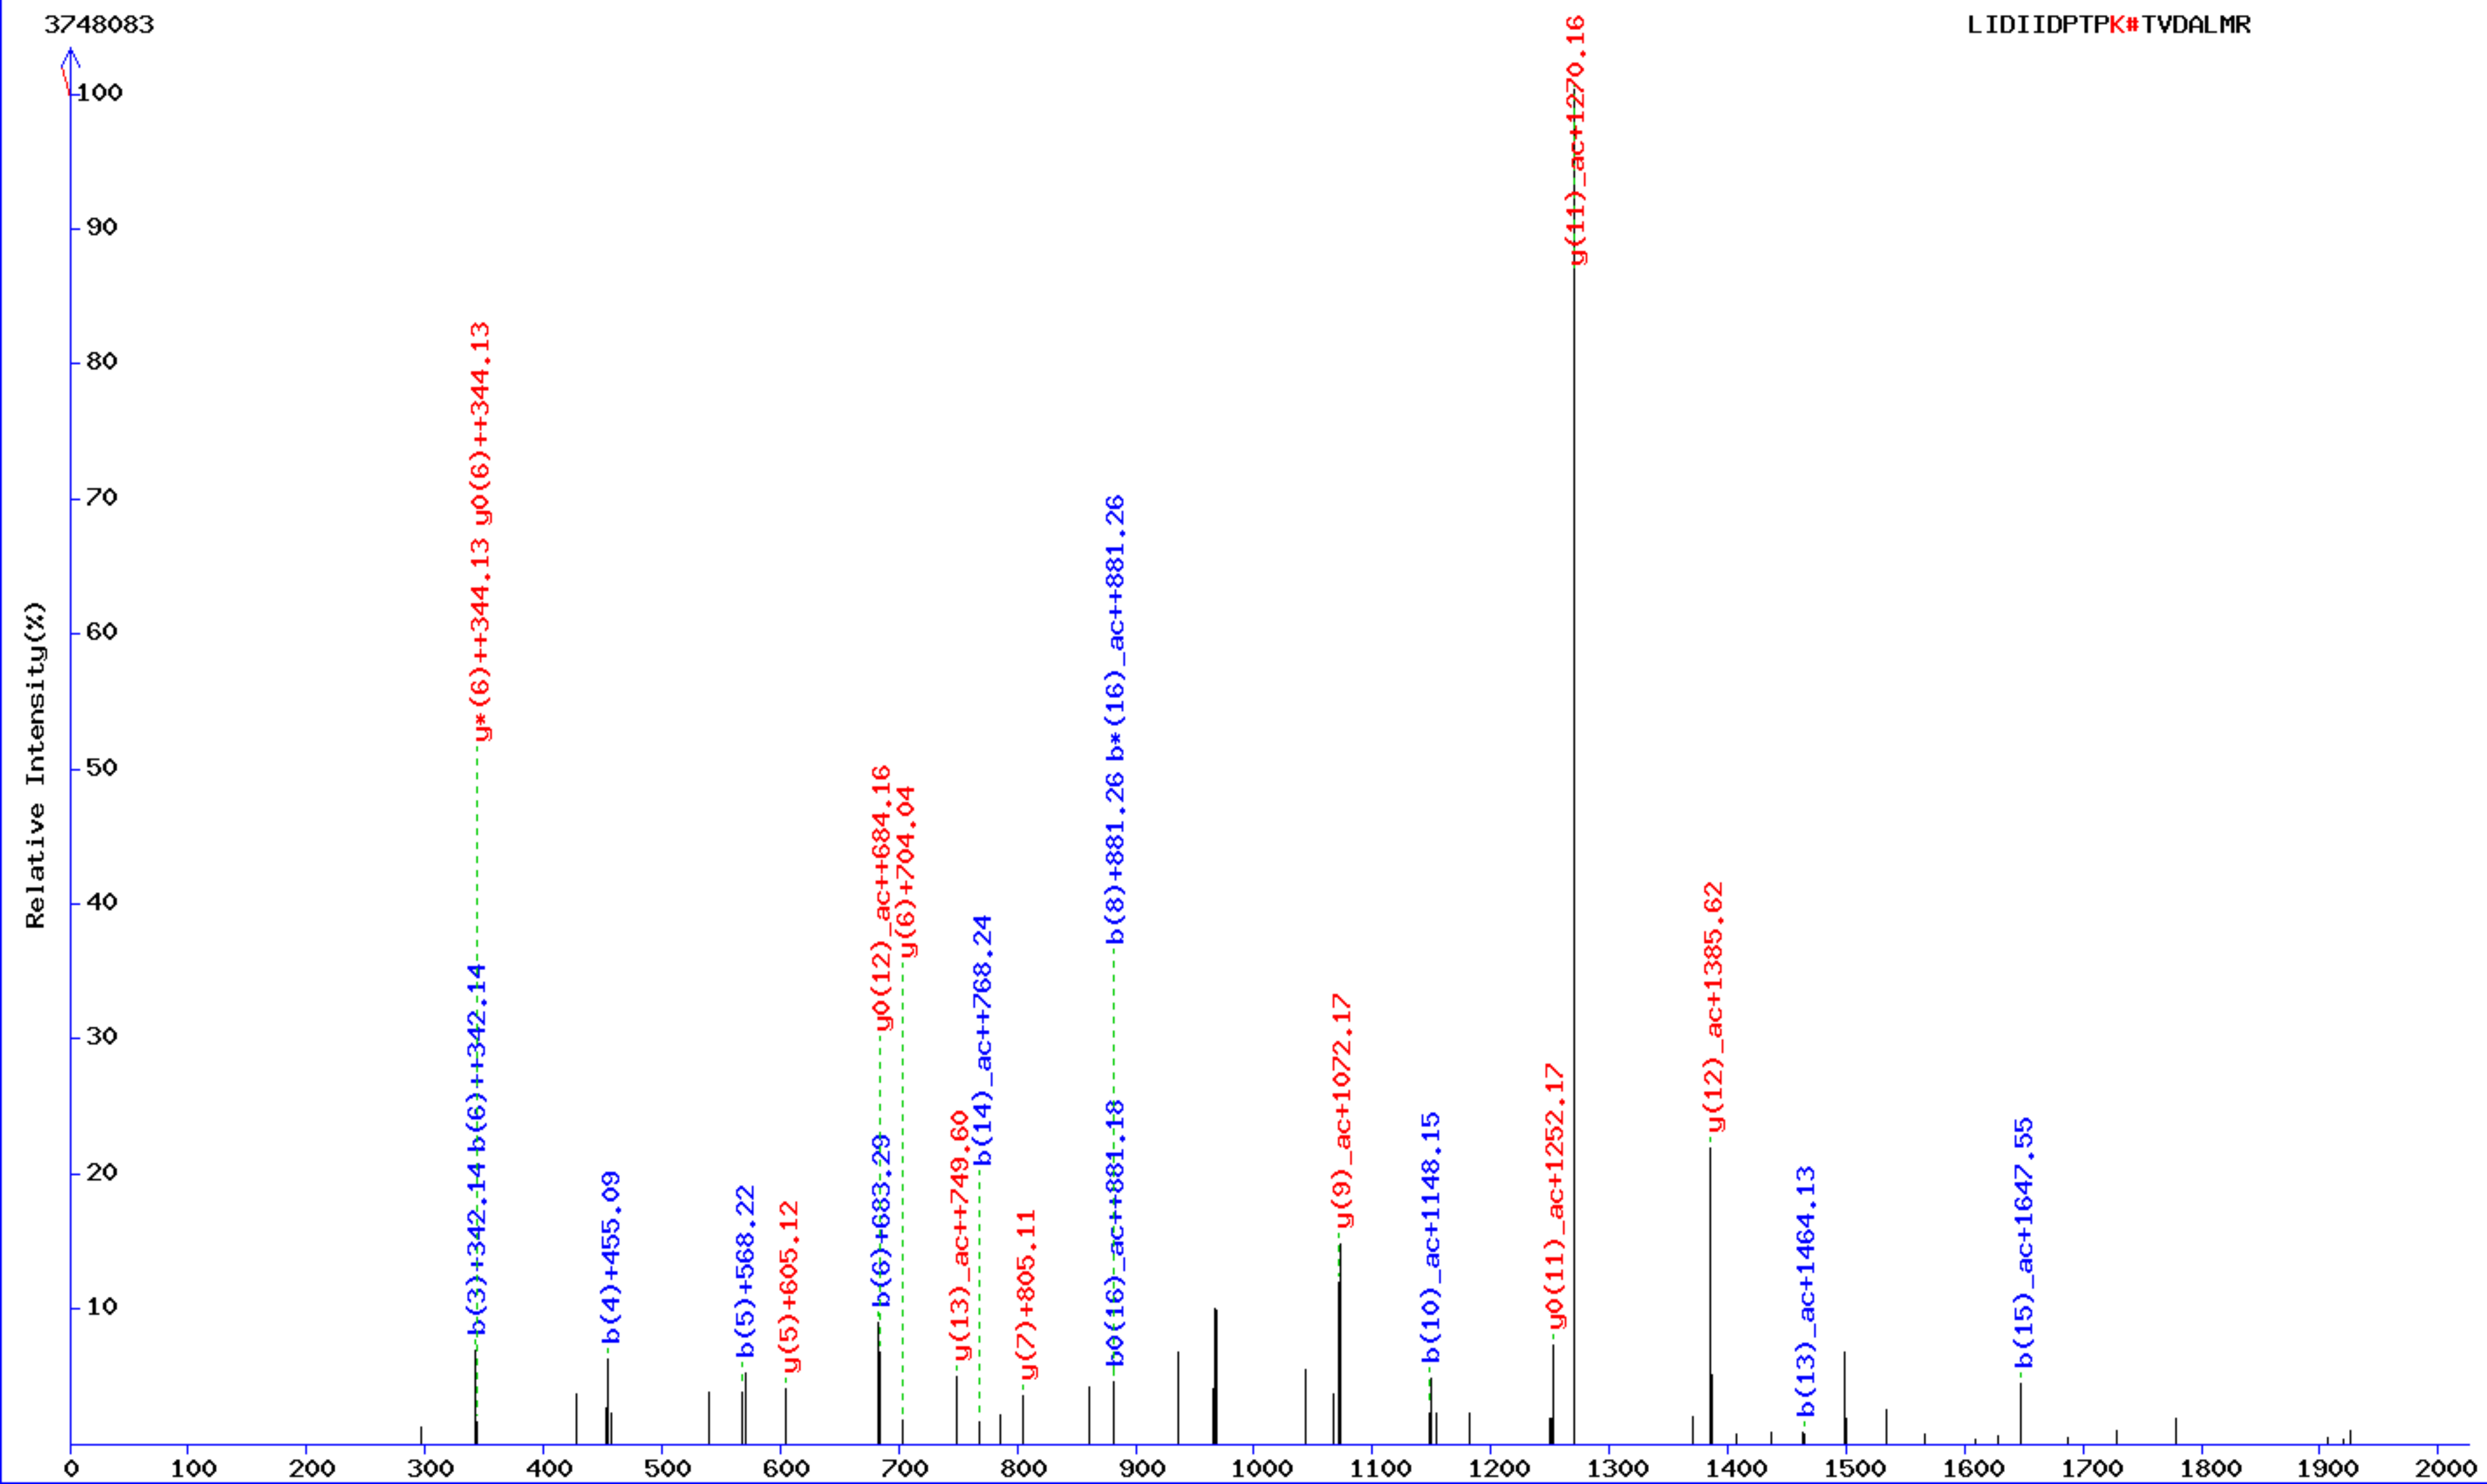

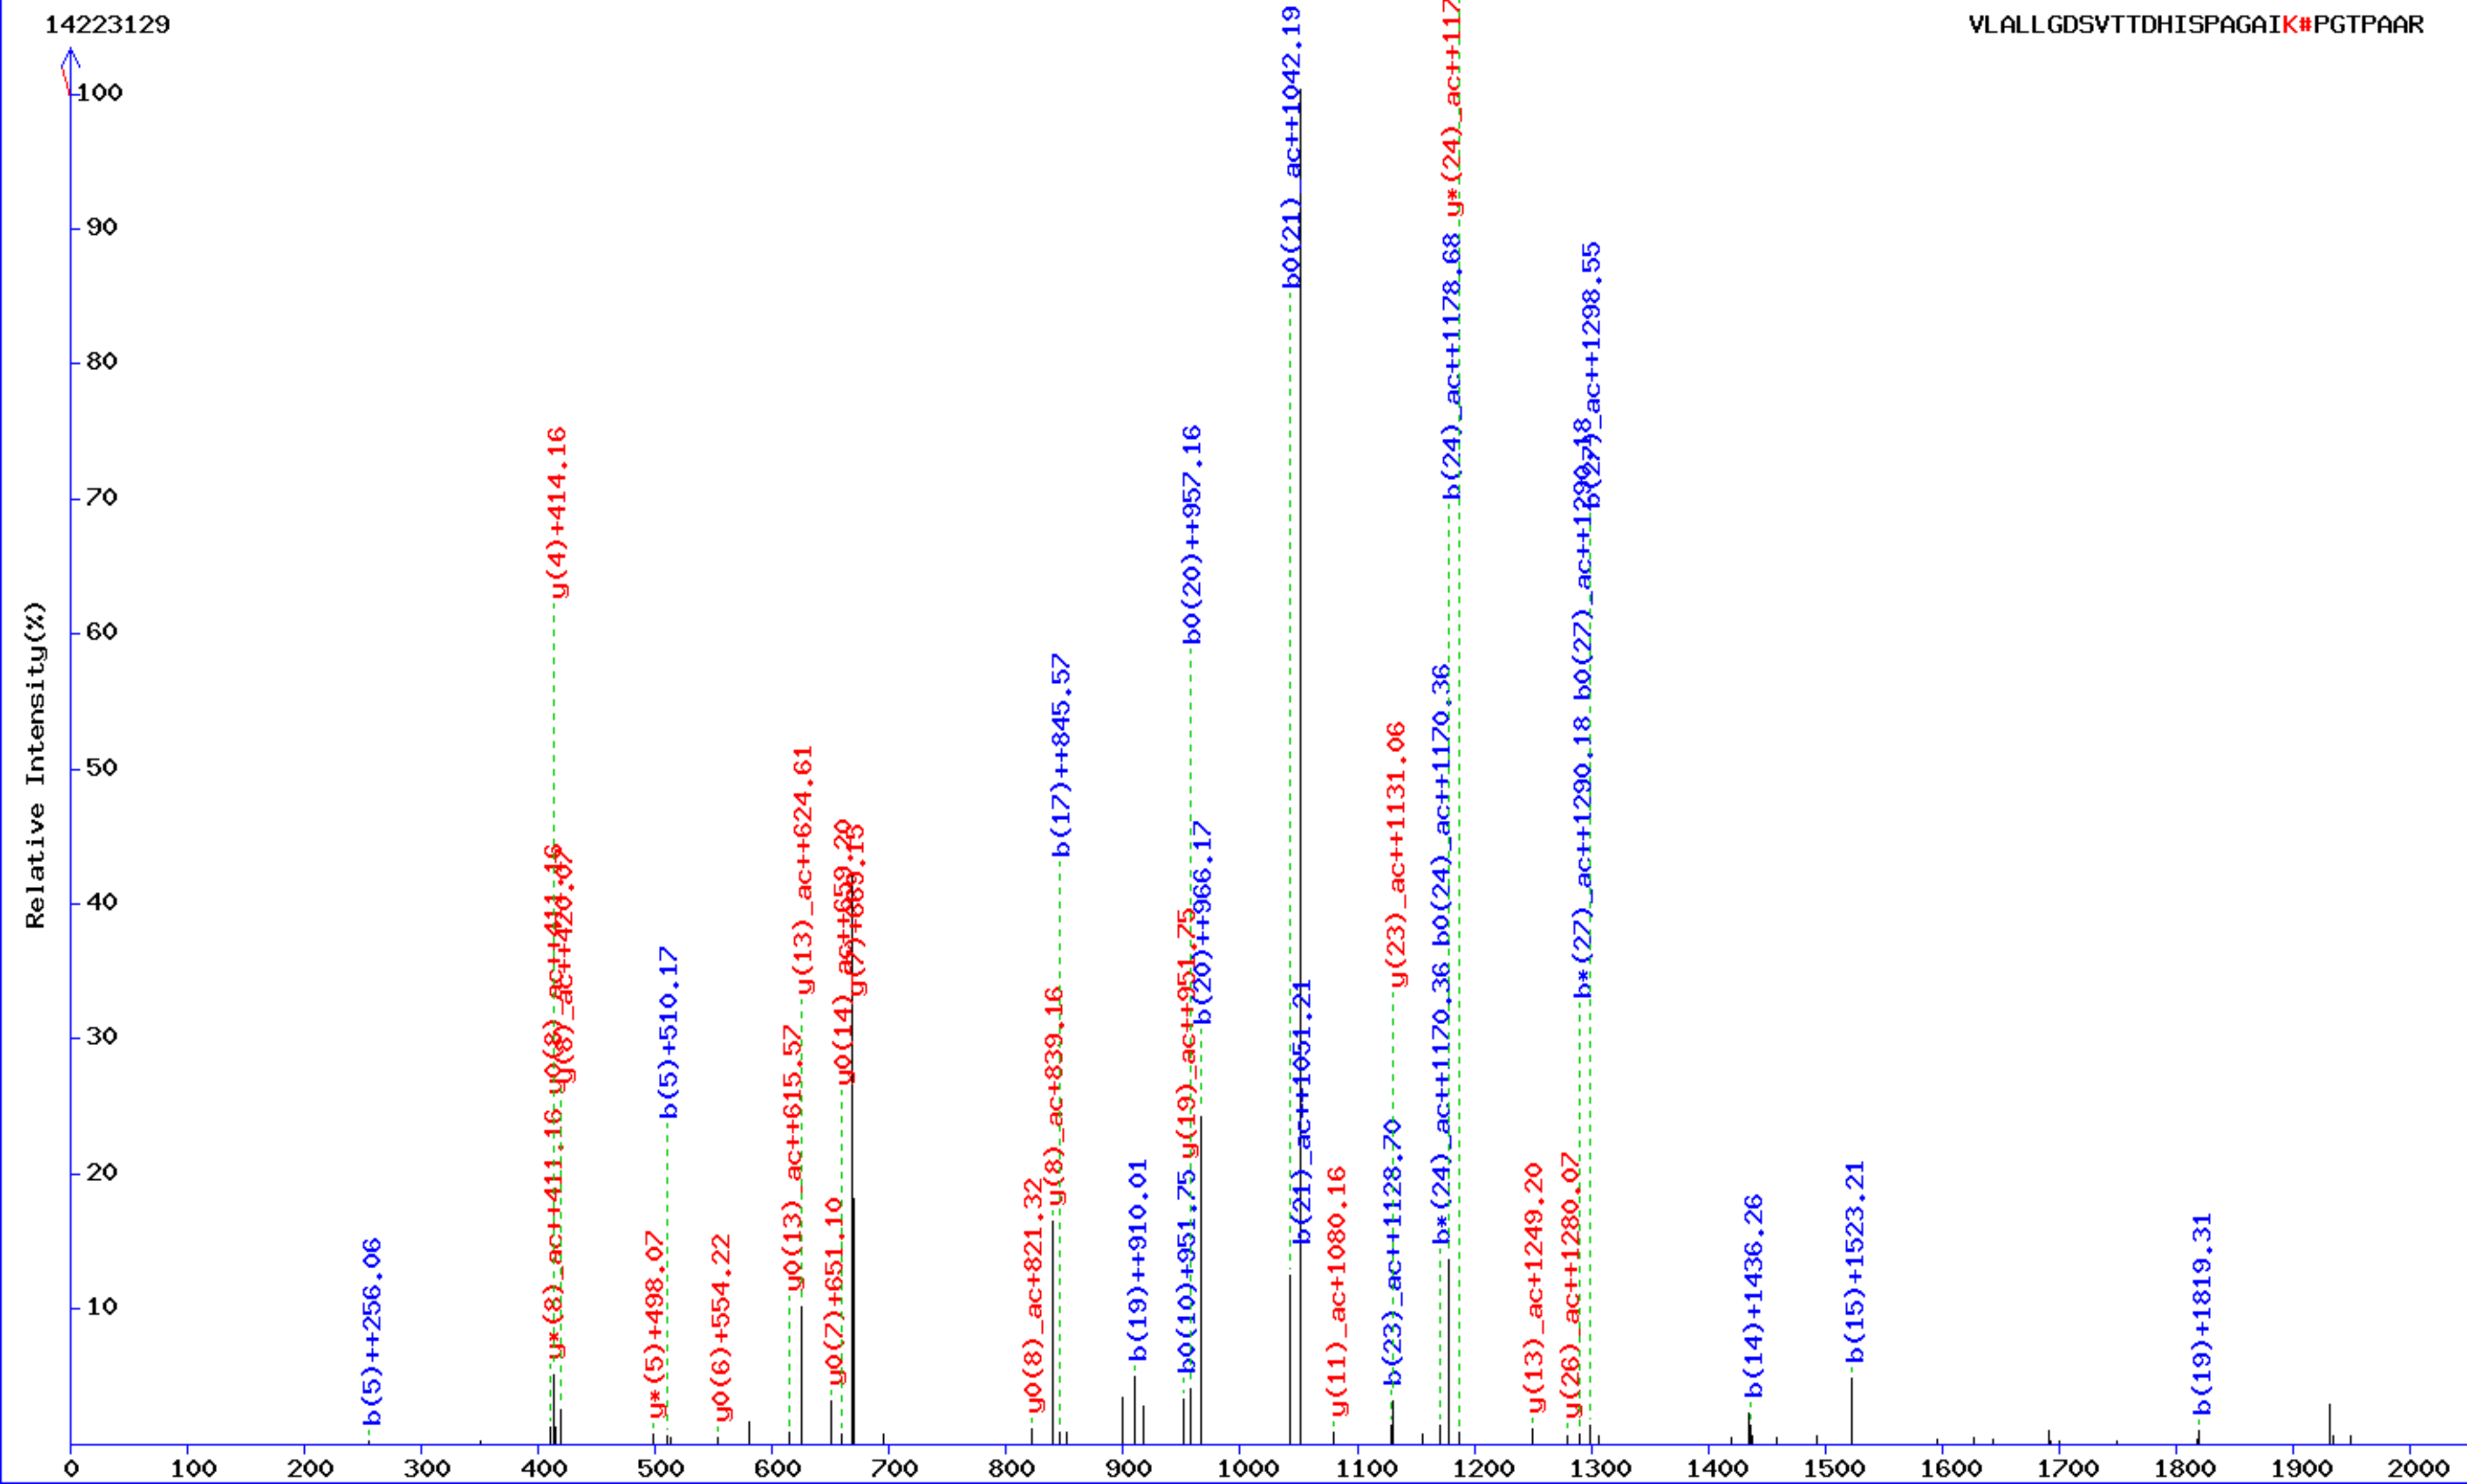



# gi|148660460 MRA\_0694 elongation factor Tu

FPDLNETK#AFDQIDNAPEER

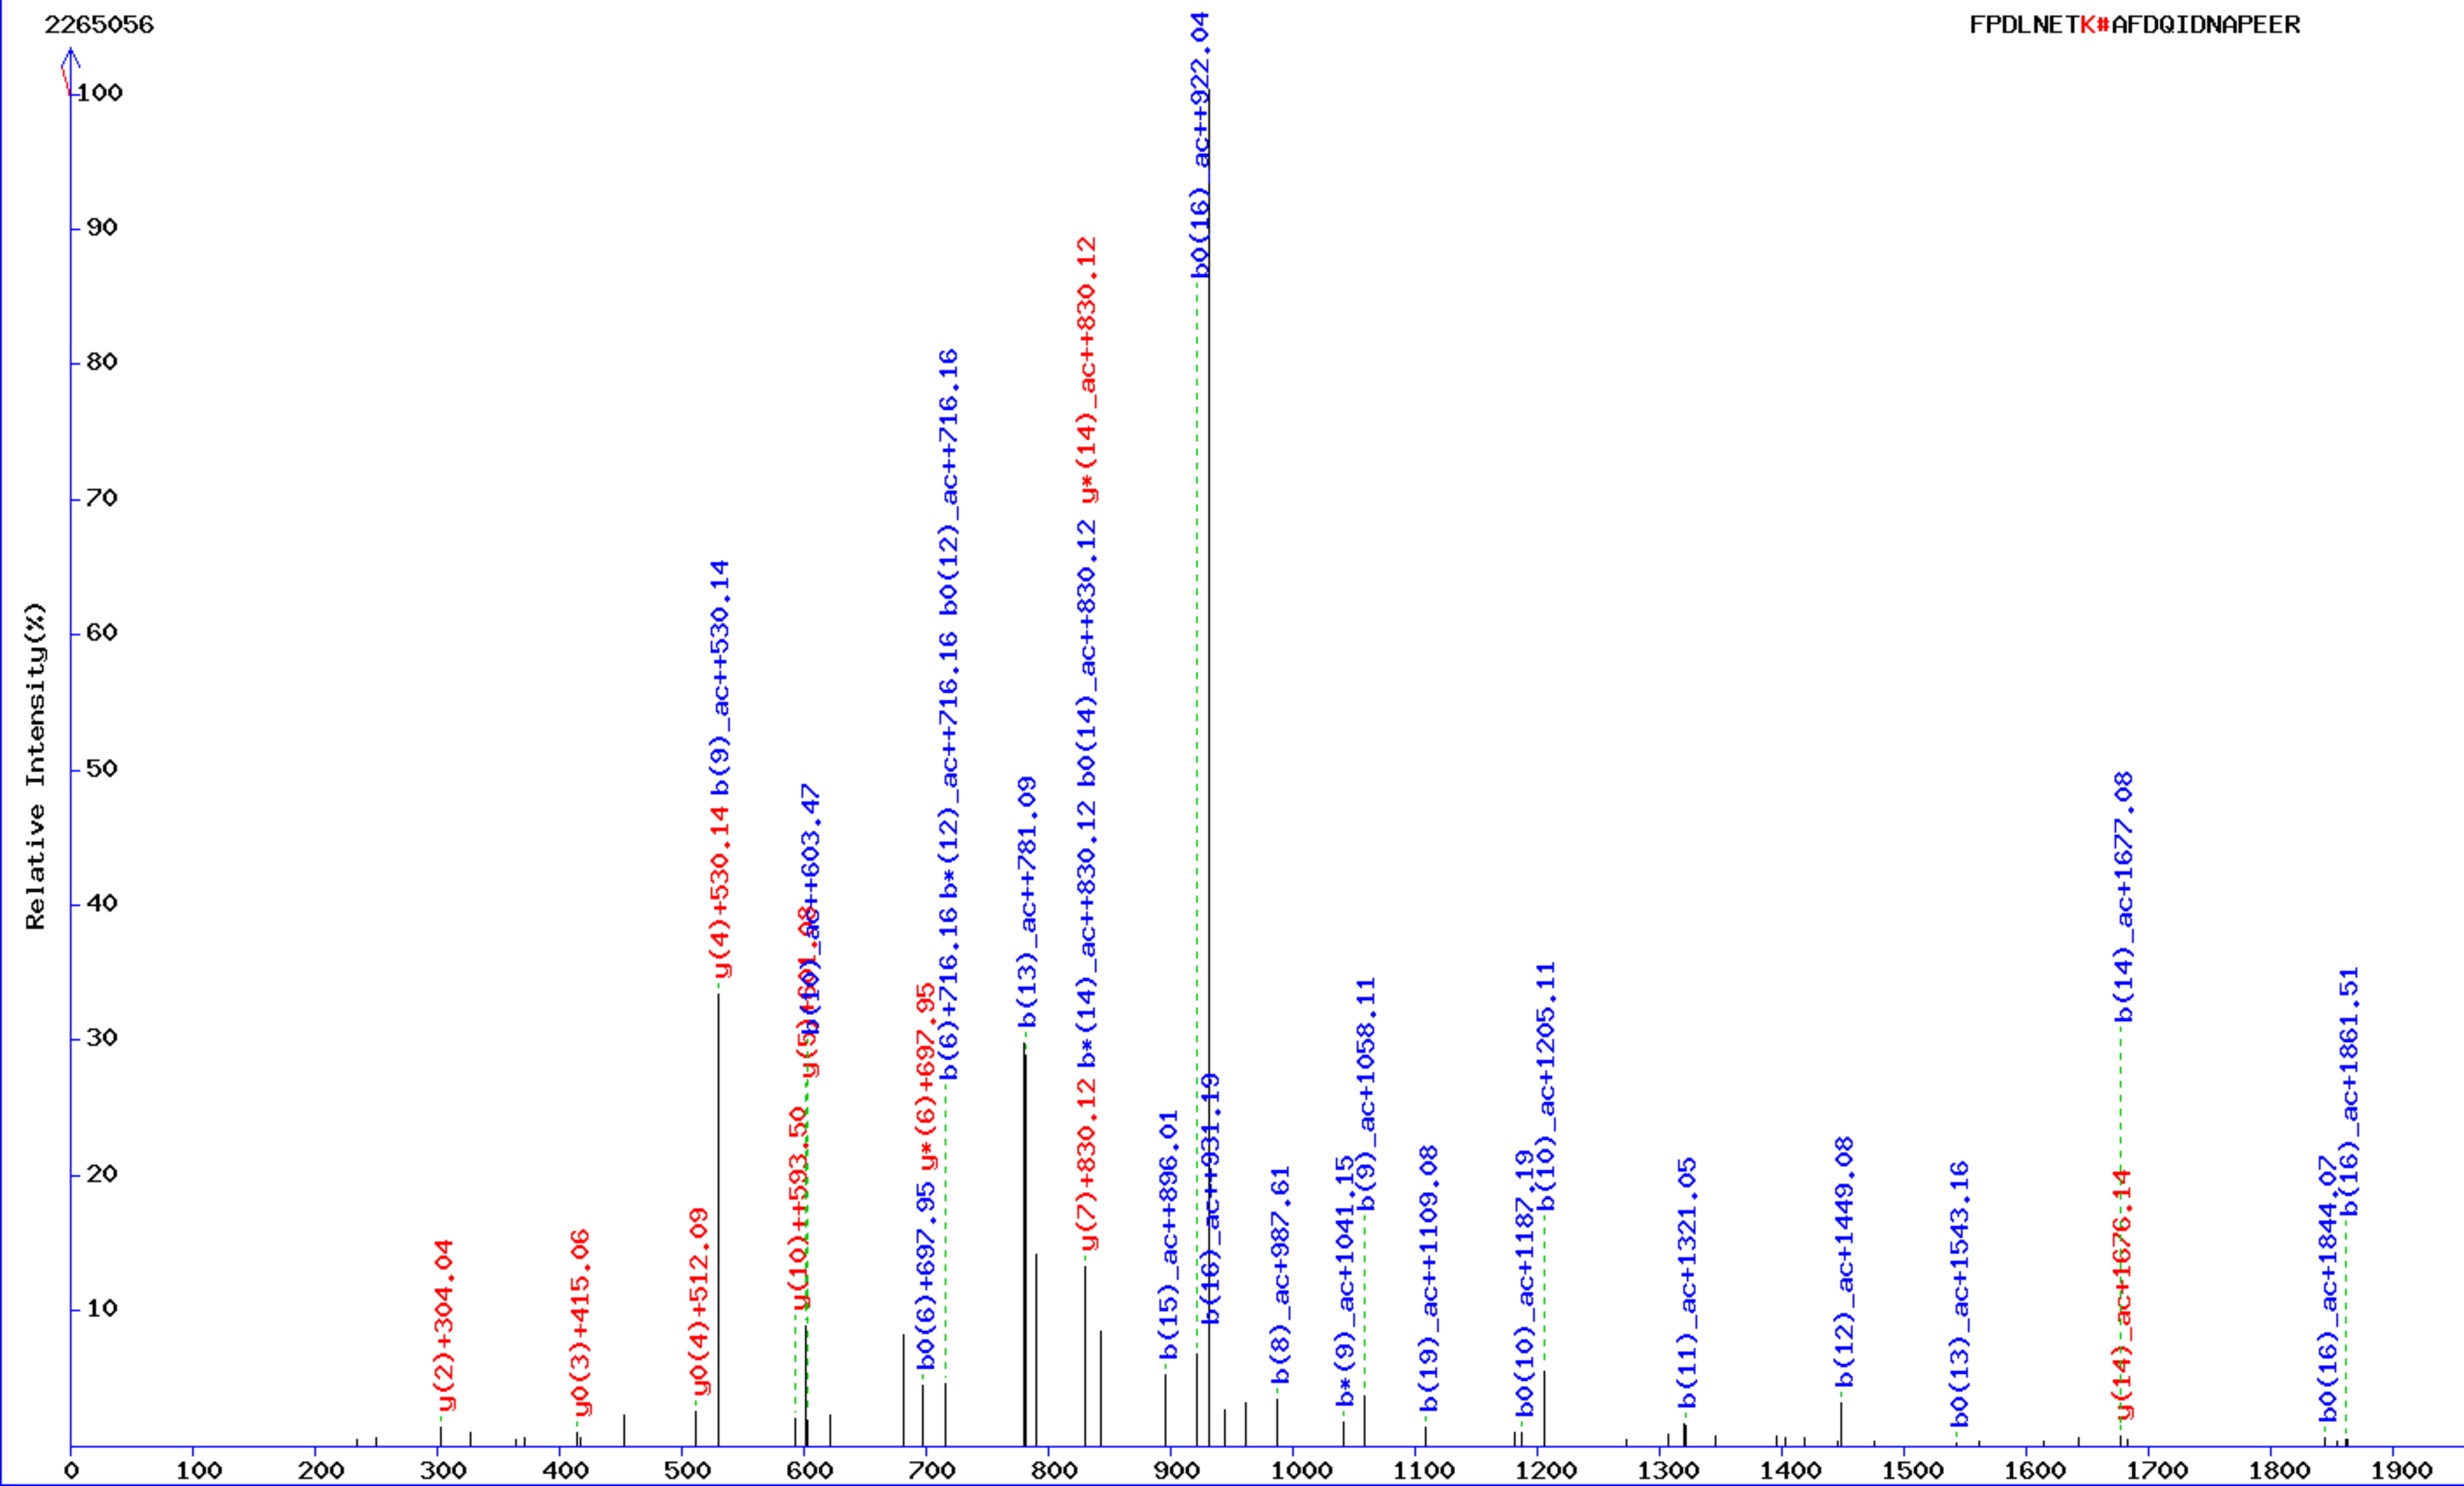

# gi|148659912 MRA\_0155 short-chain type dehydrogenase/reductase

VALFGNDGANFDK#PPSVQDVAAR

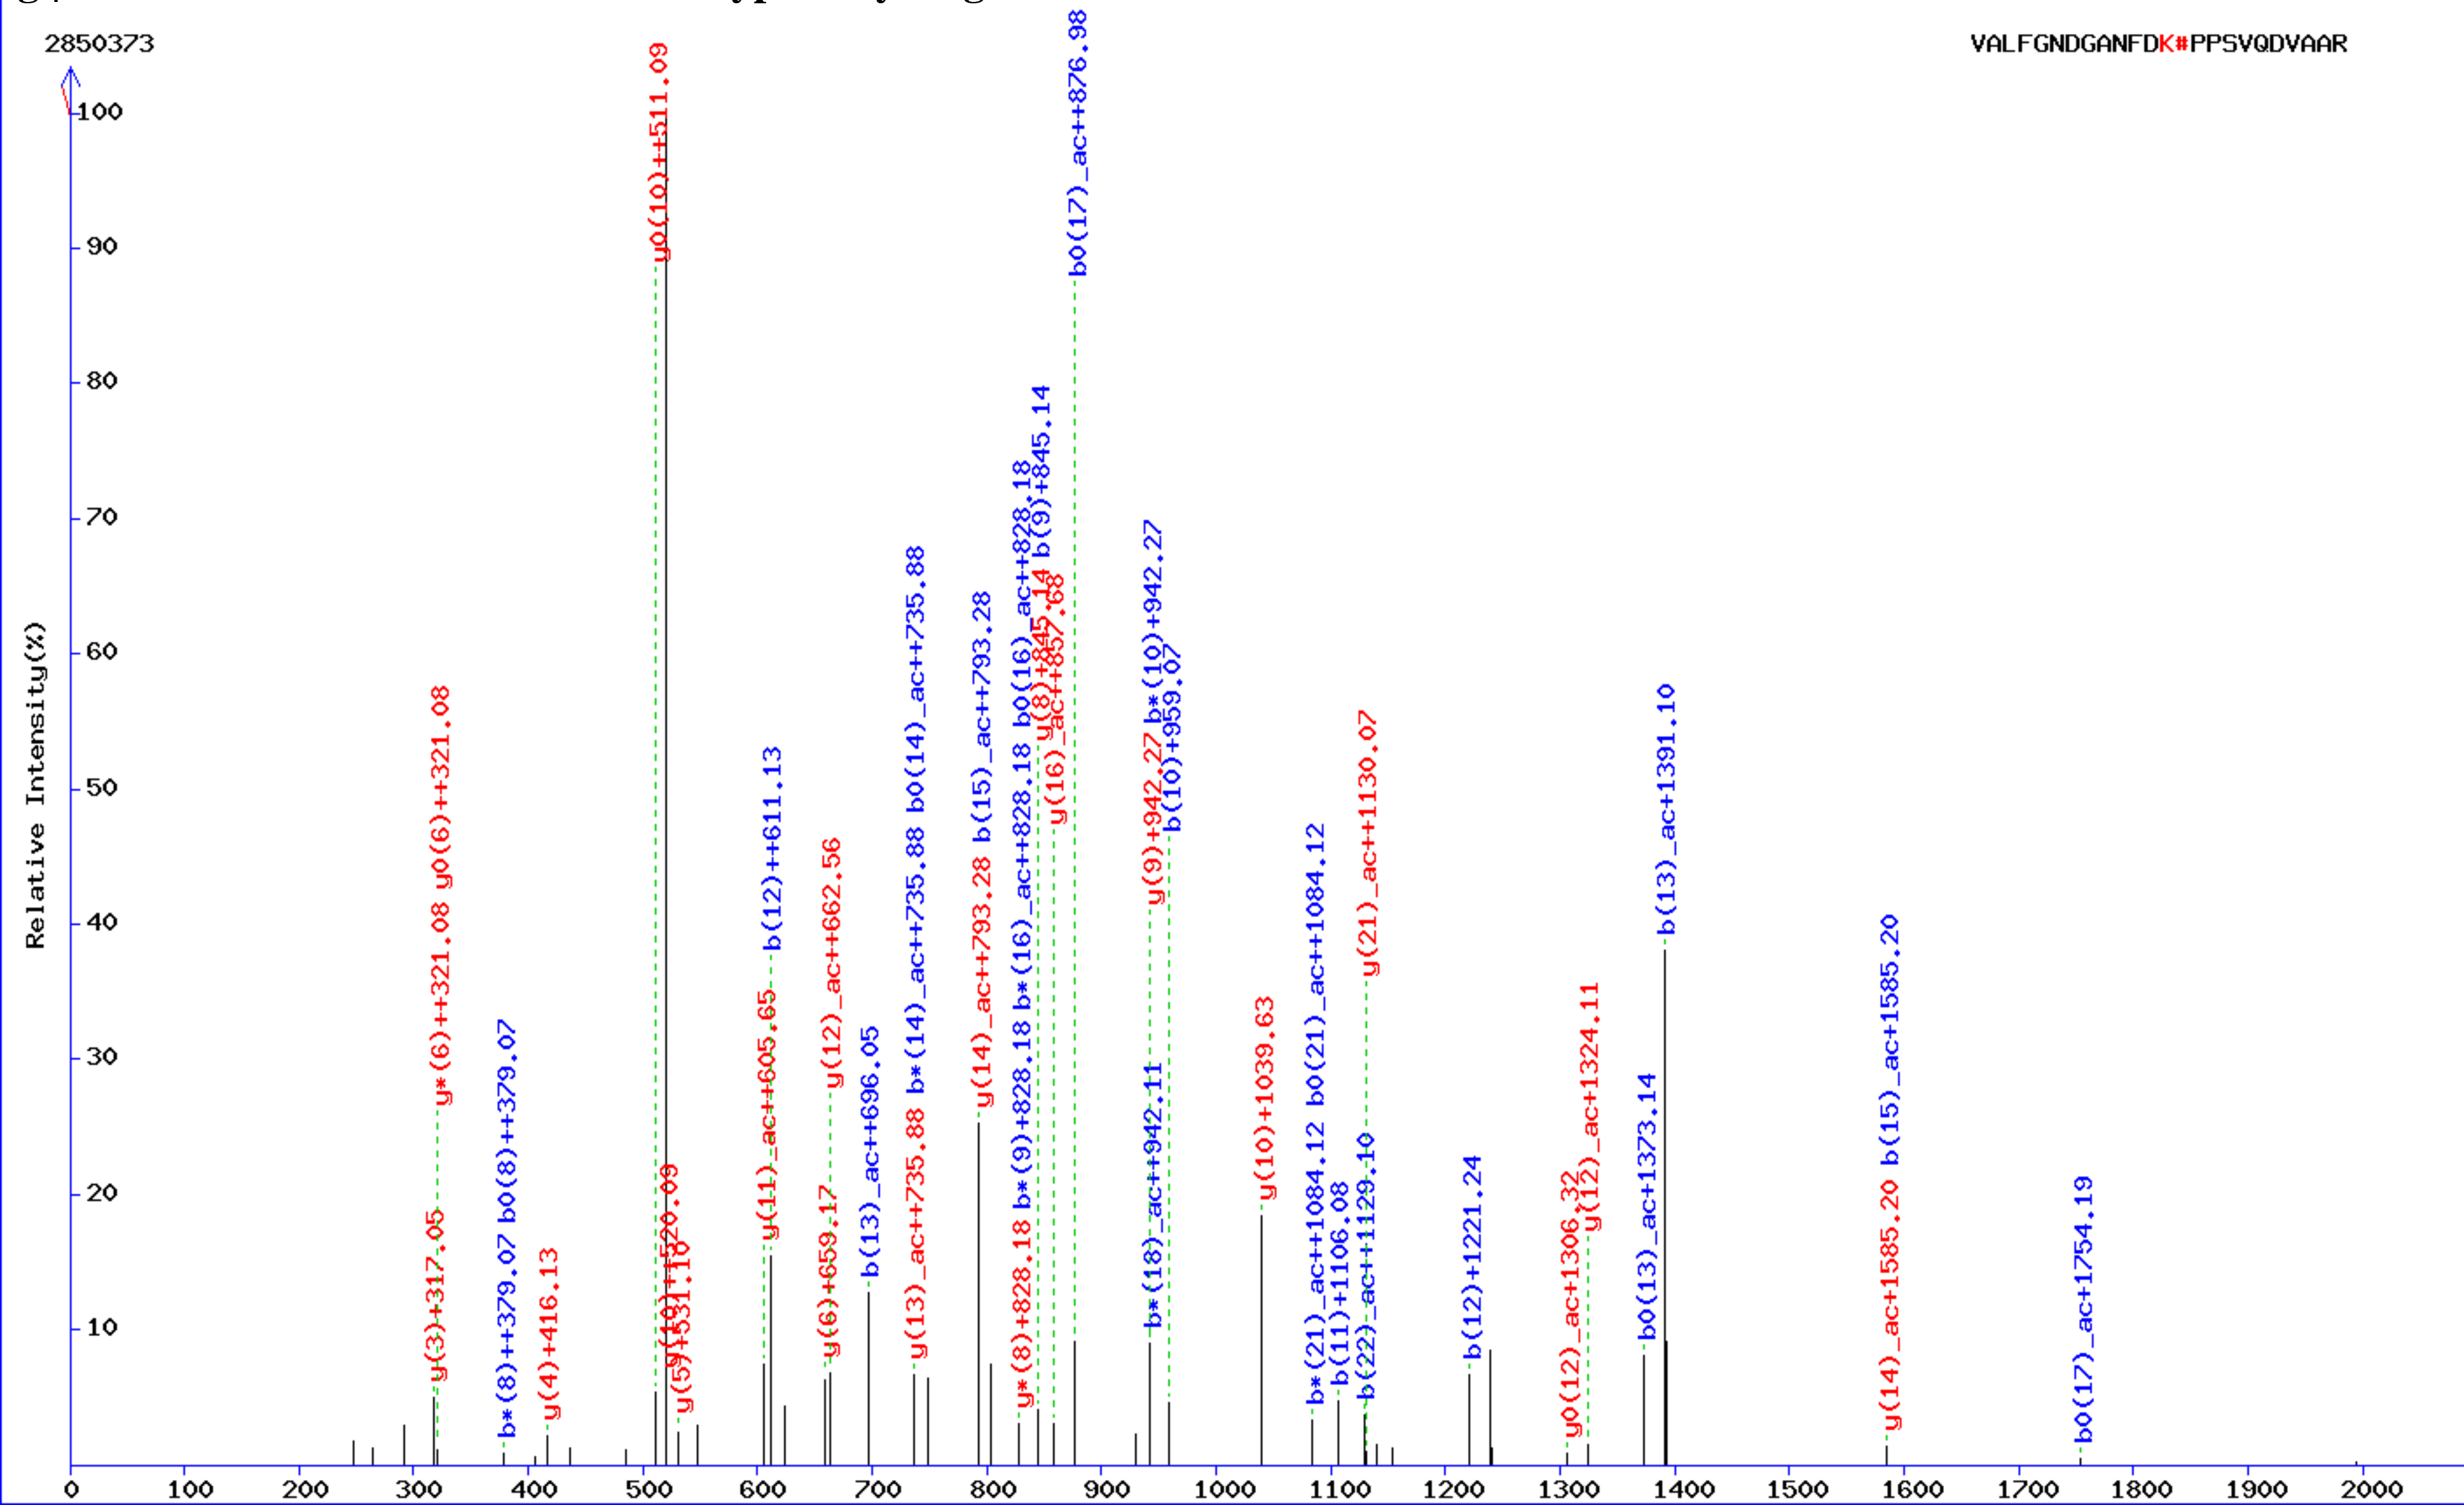

# gi|148661529 MRA\_1741 succinic semialdehyde dehydrogenase

IYVEK#DIAEEFTR

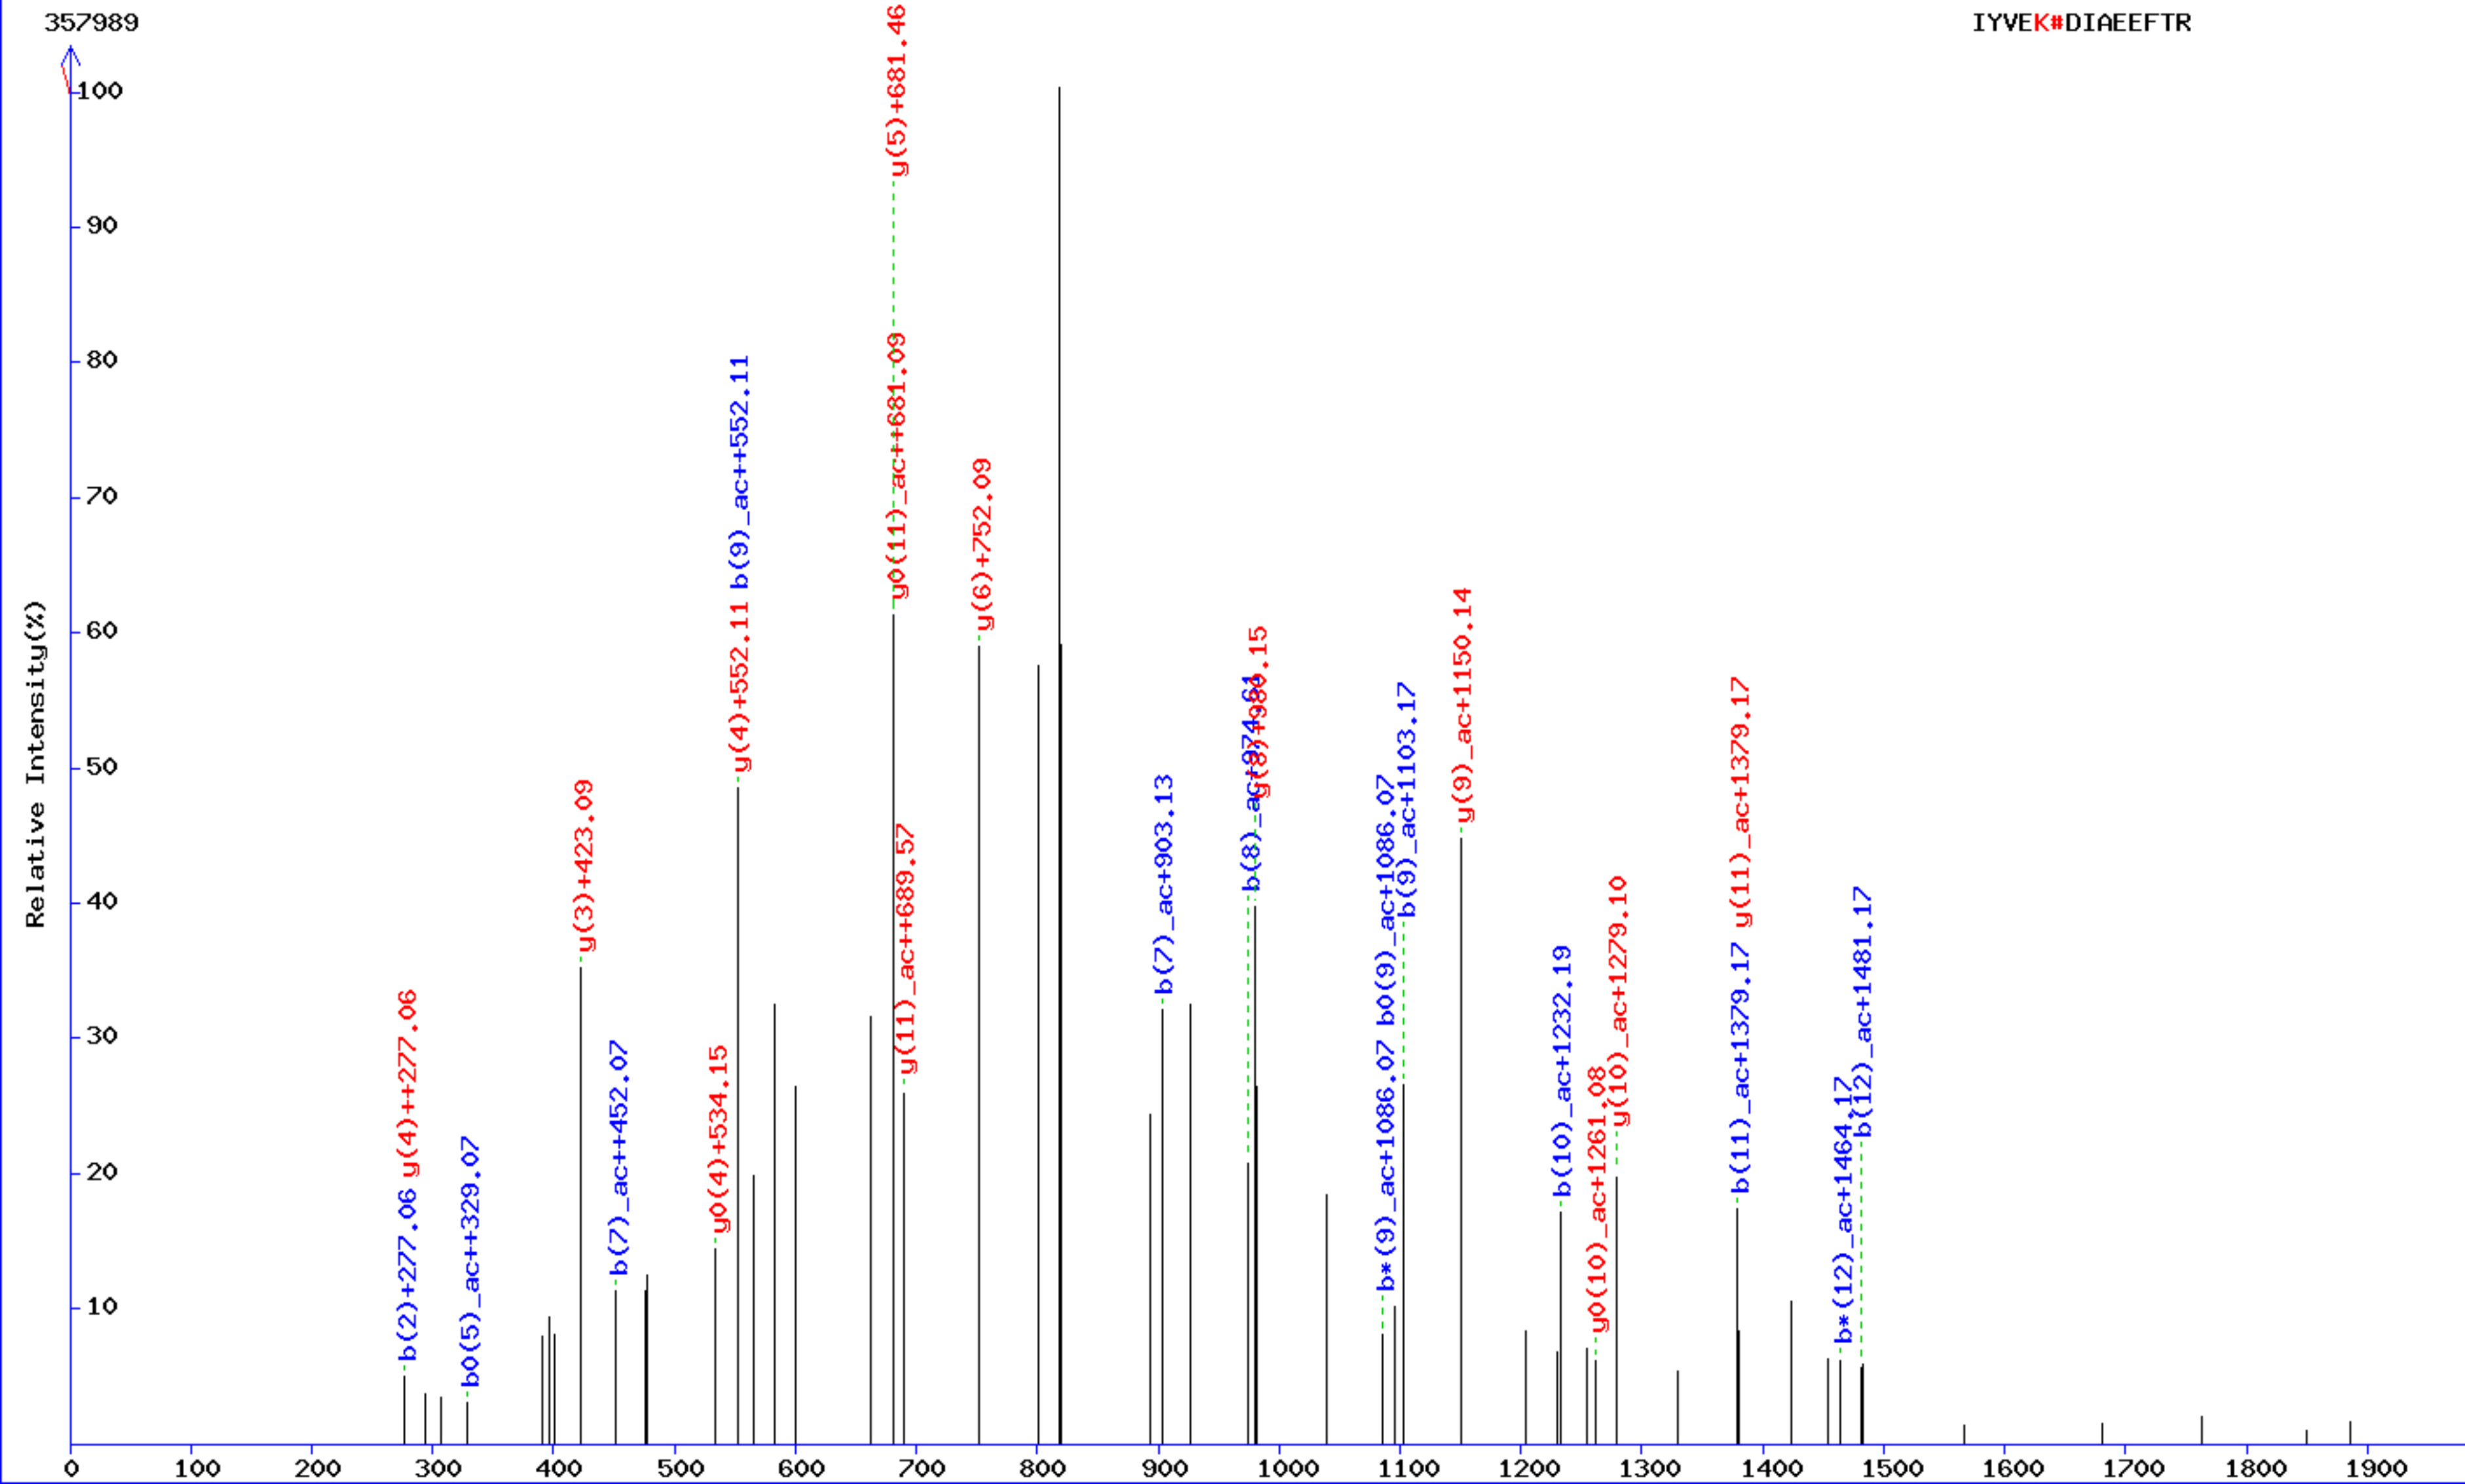

# gi|148660228 MRA\_0468 dihydrolipoamide dehydrogenase

NEGYDVVAK#FPFTANAK

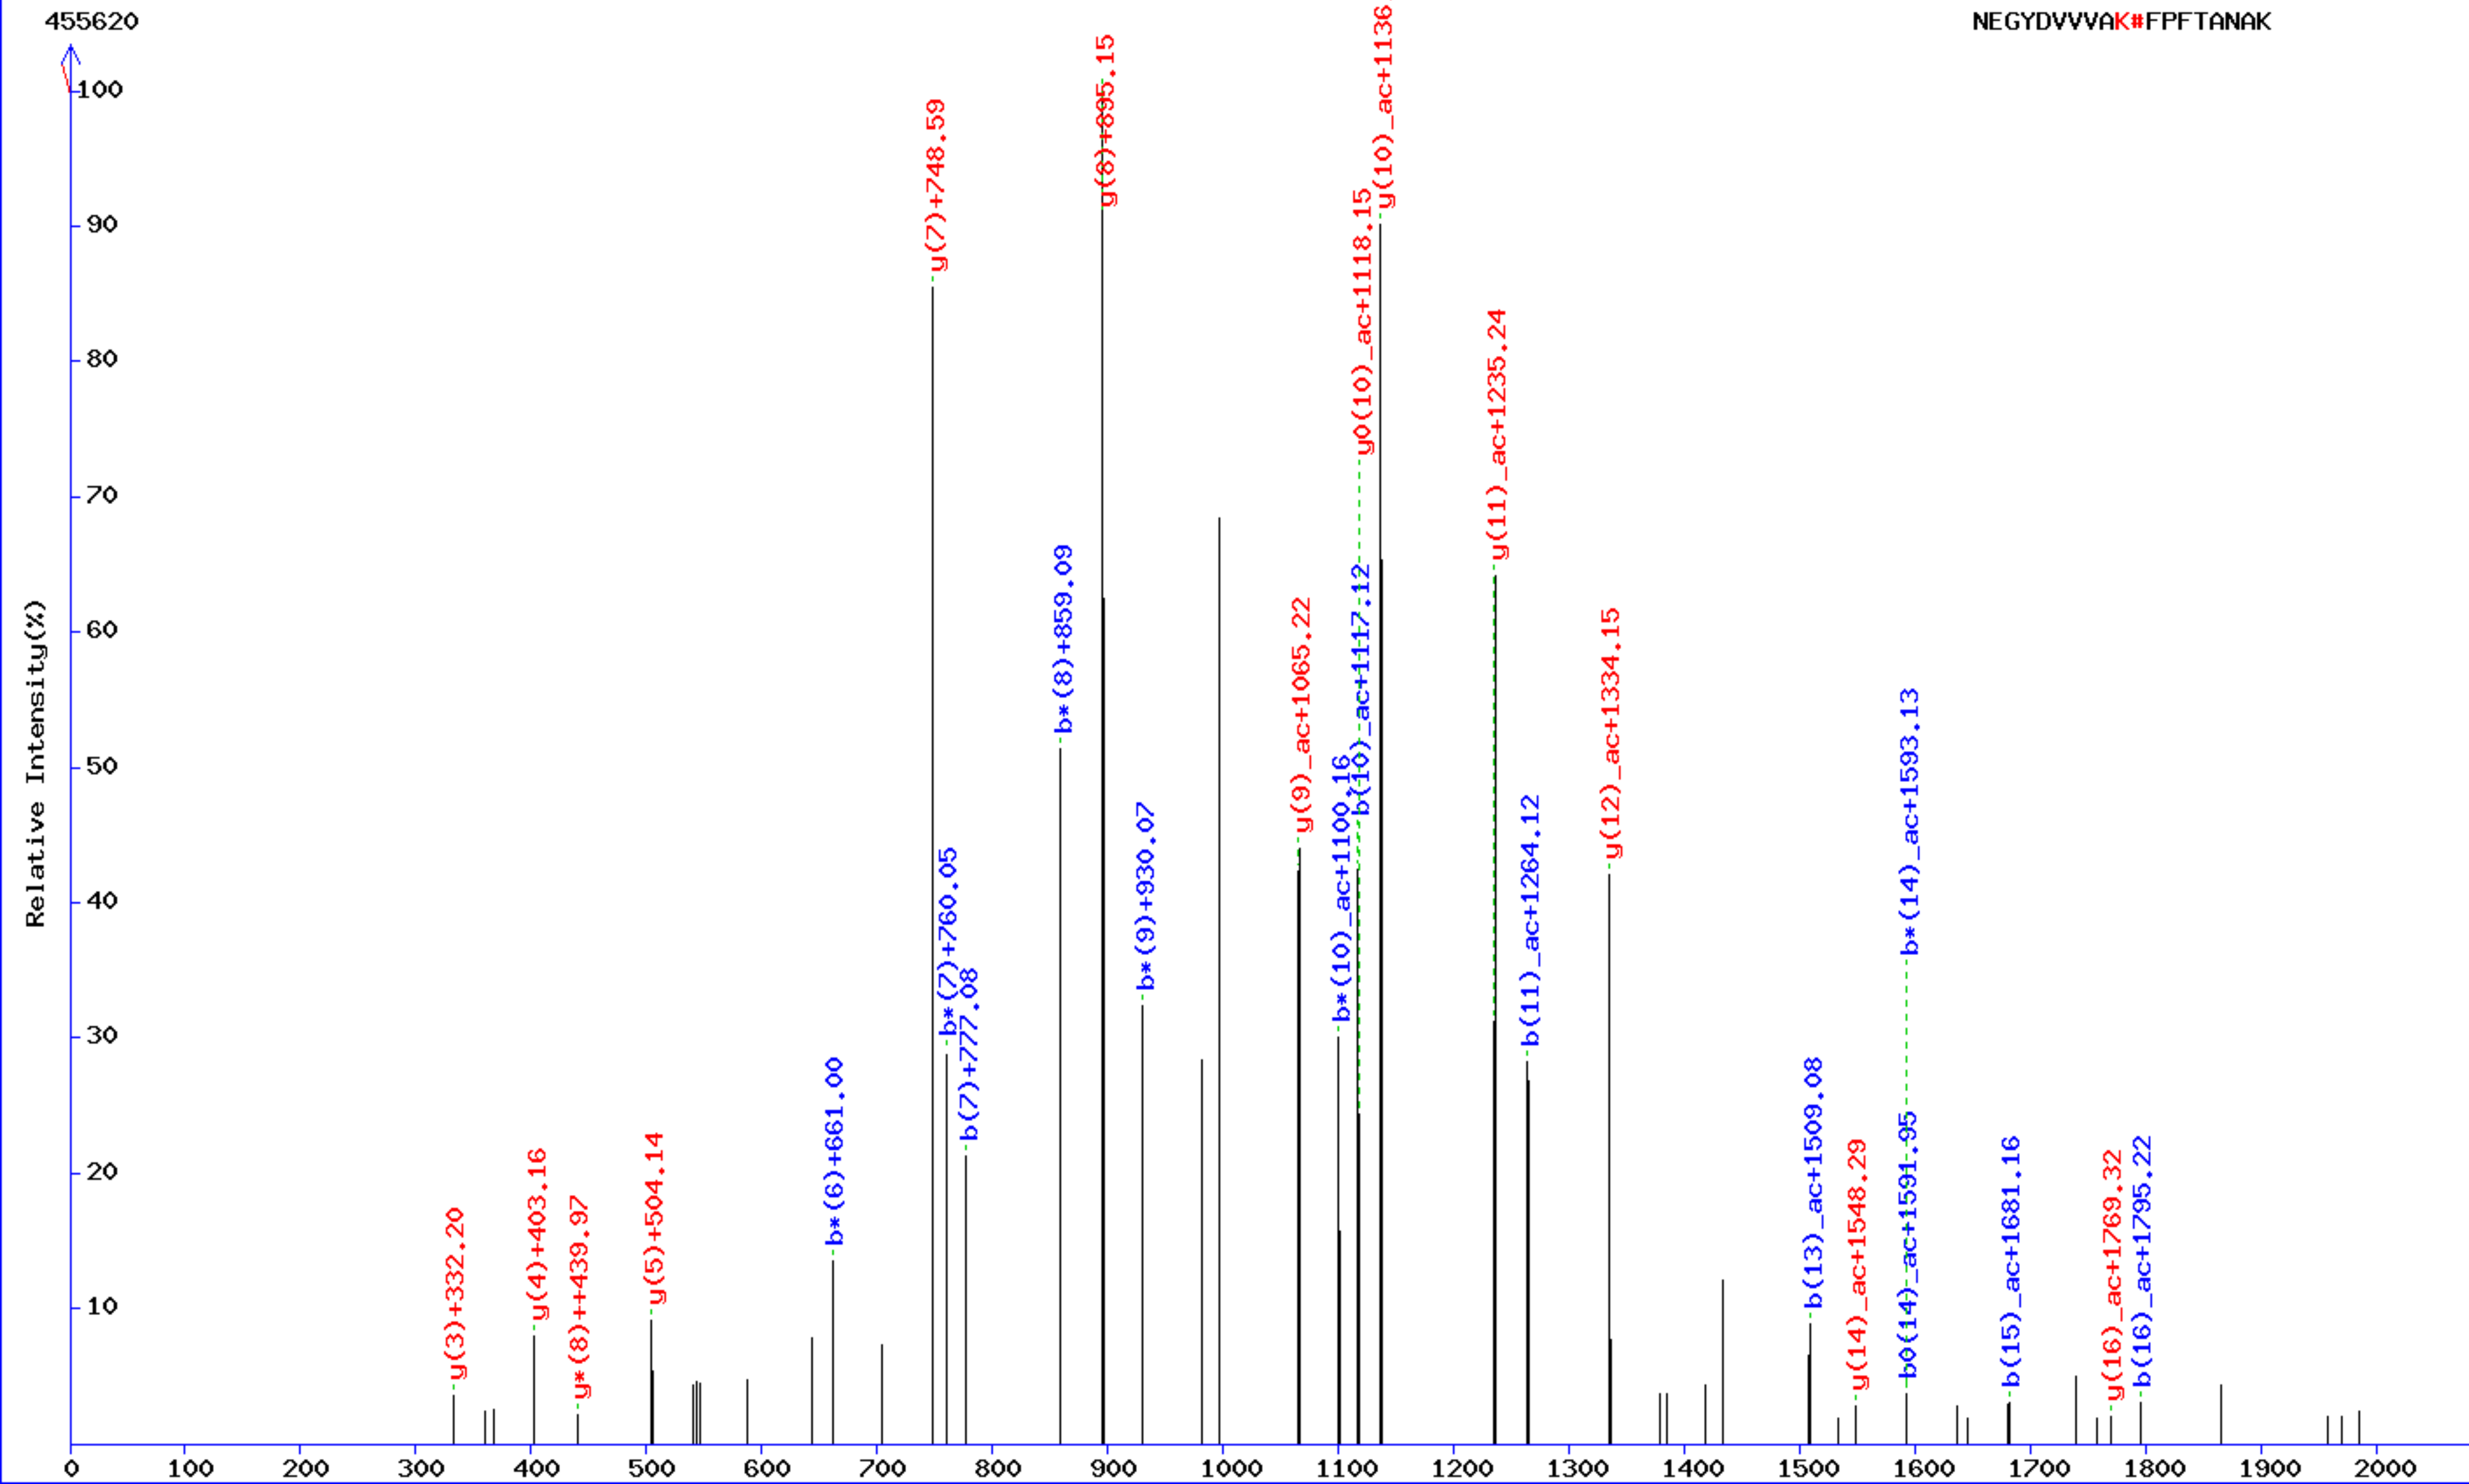

# gi|148663007 MRA\_3185 NADH dehydrogenase subunit H

YDQFMALGWK#

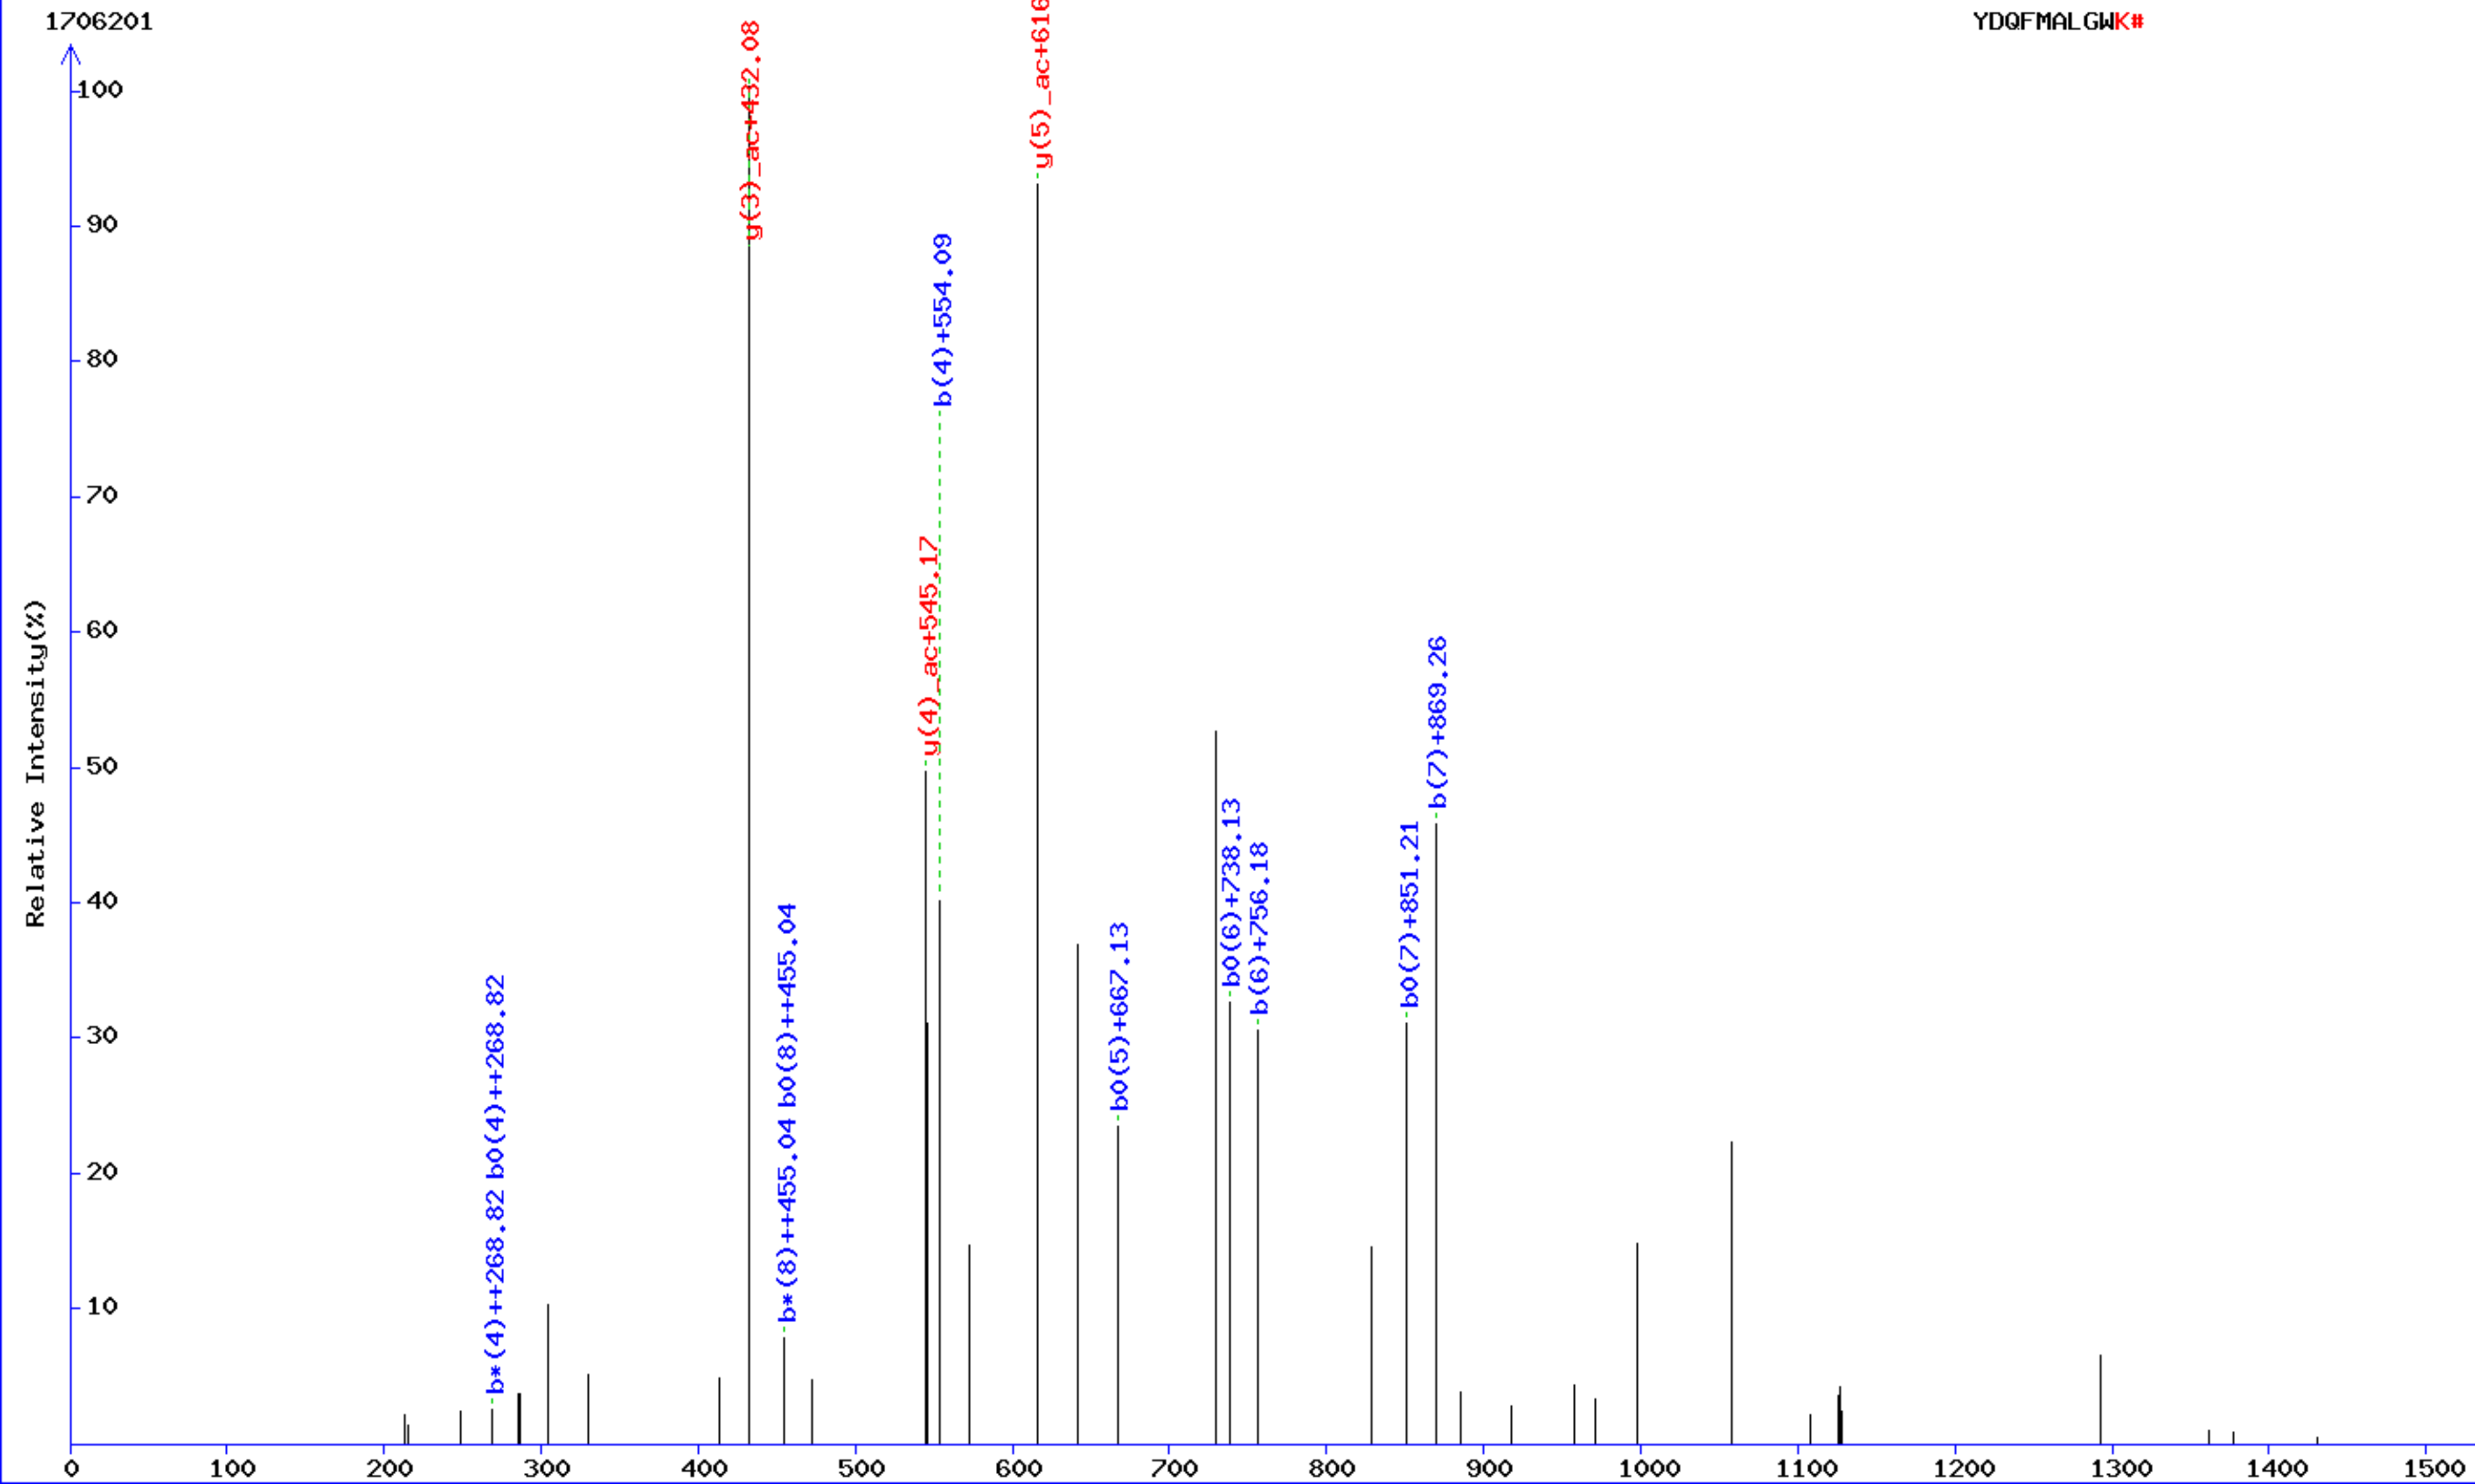

# gi|148662385 MRA\_2575 hypothetical protein

EELELLDRAAK#ASGASR

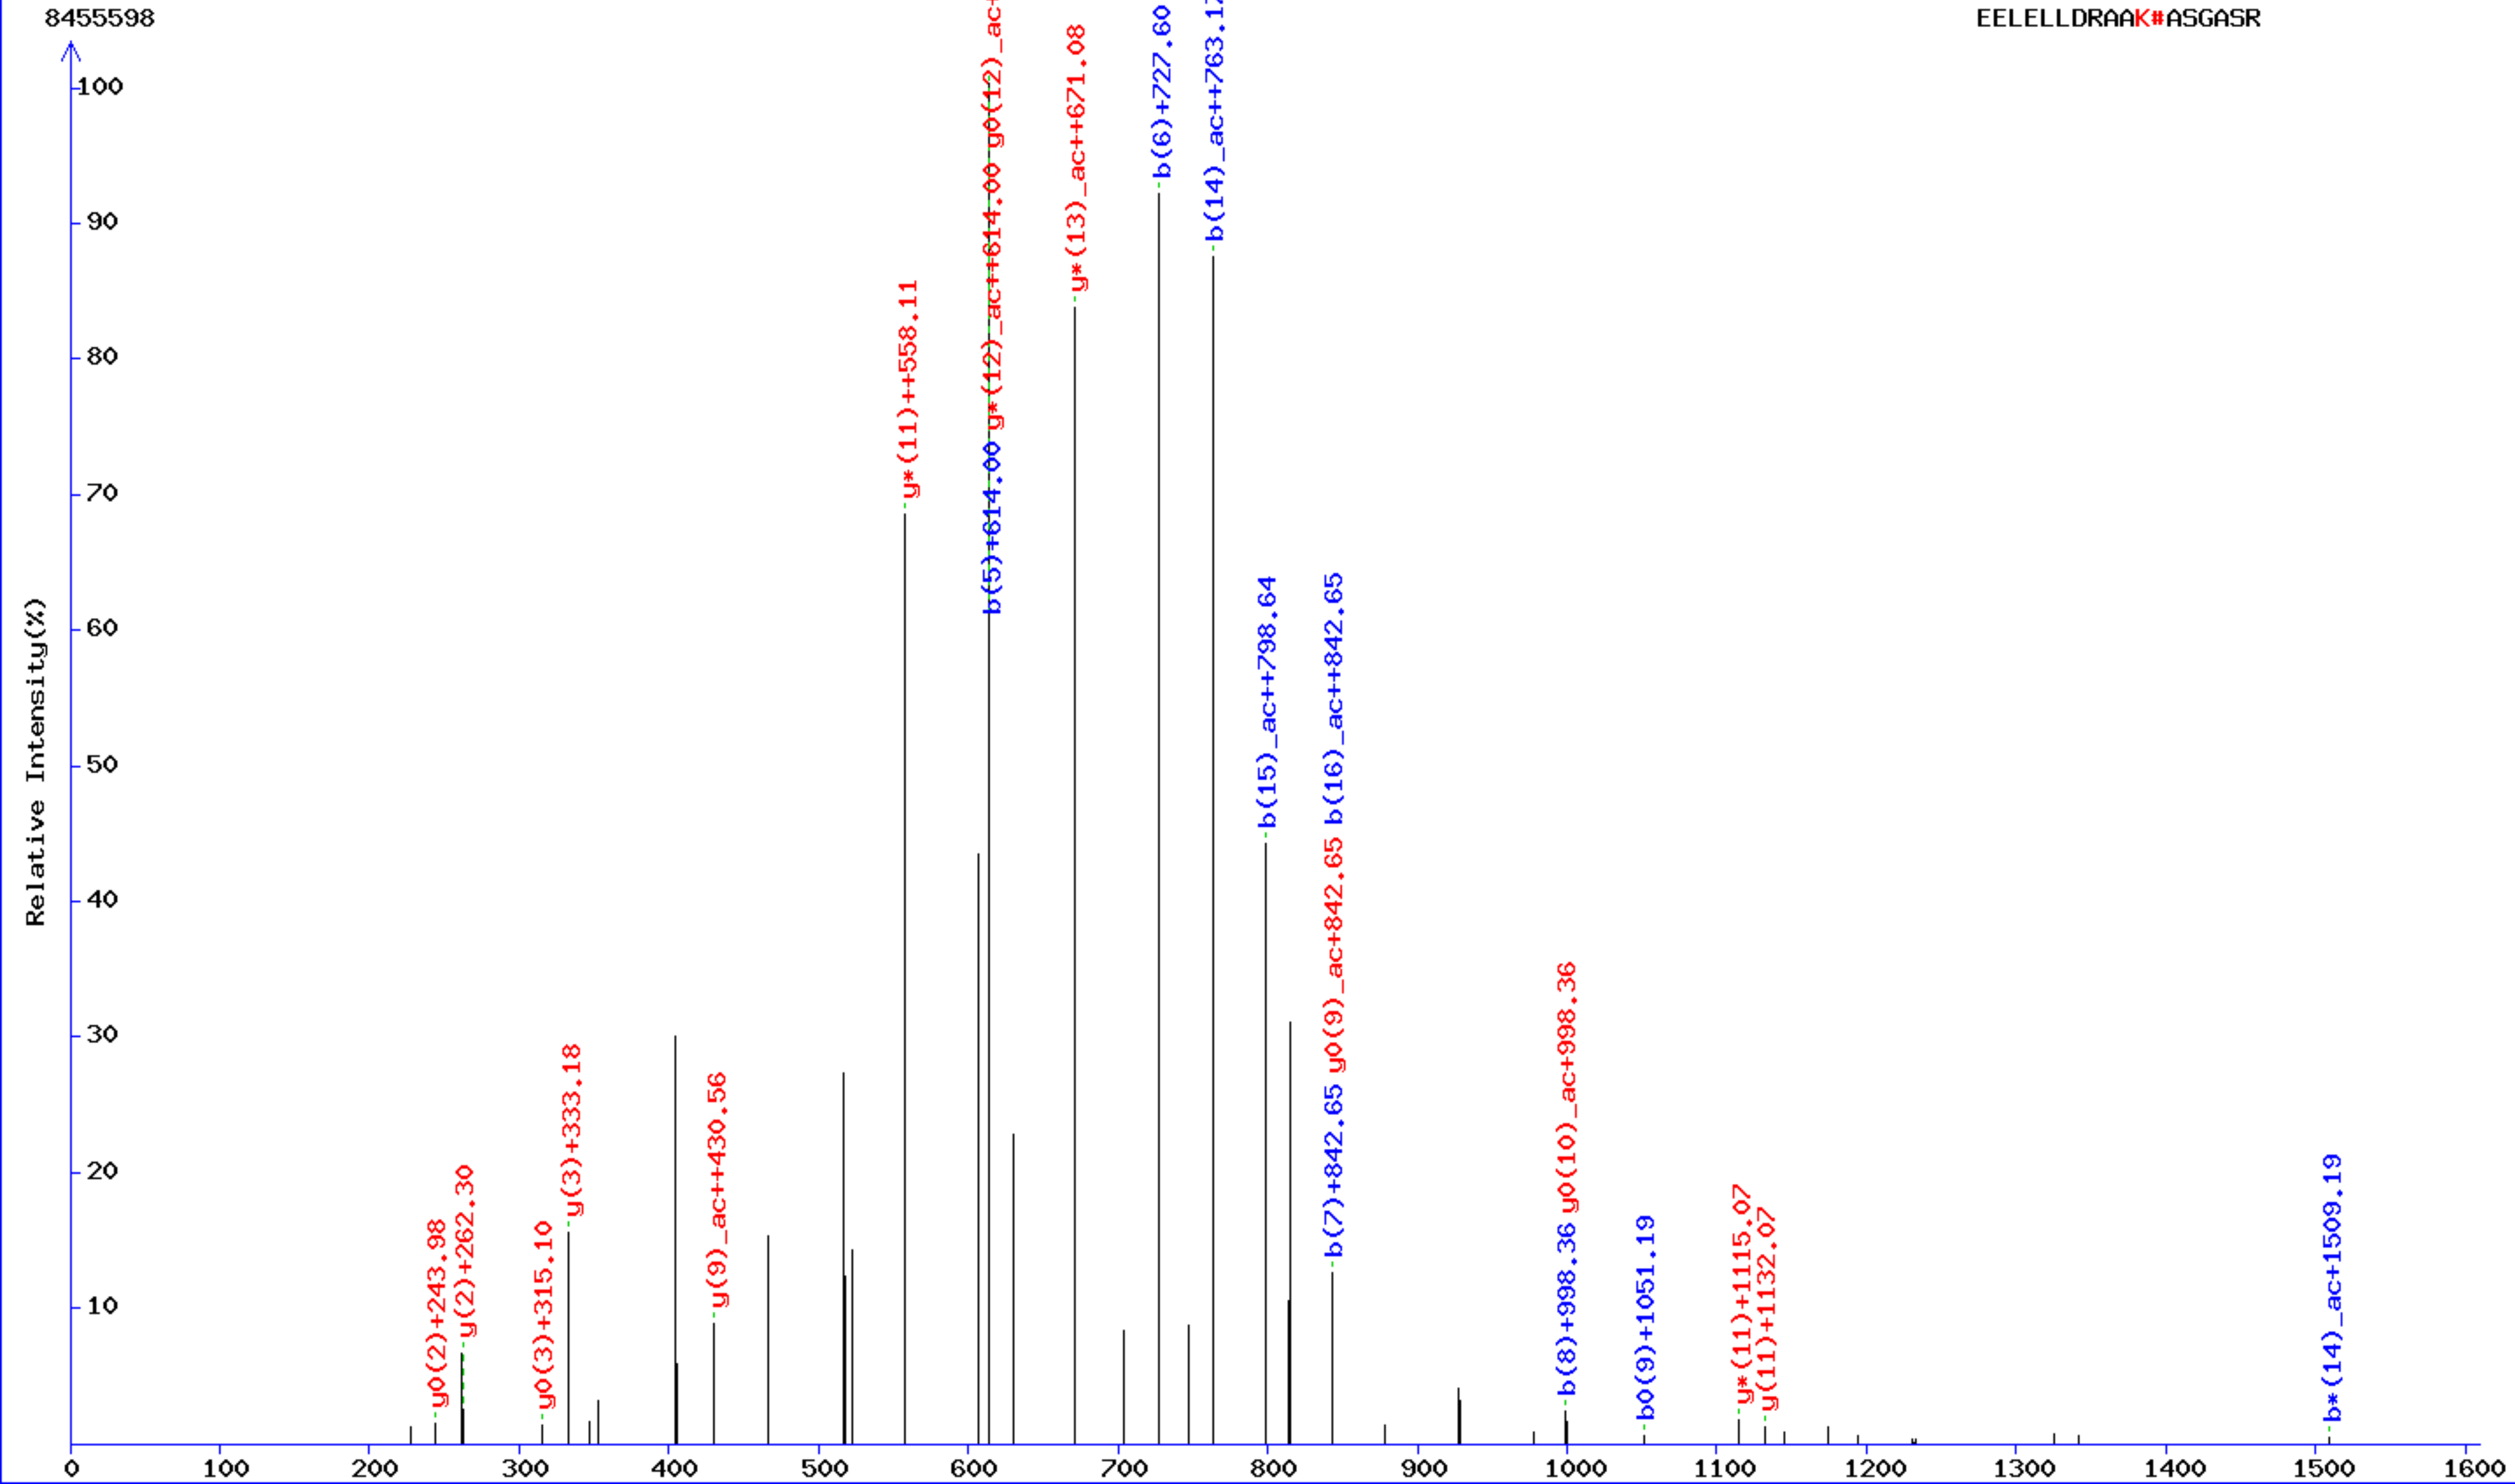

gi|148662995 MRA\_3173 acyl-CoA dehydrogenase

SVLTGAGVEISYDK#PSHTQSAAAAEFLR

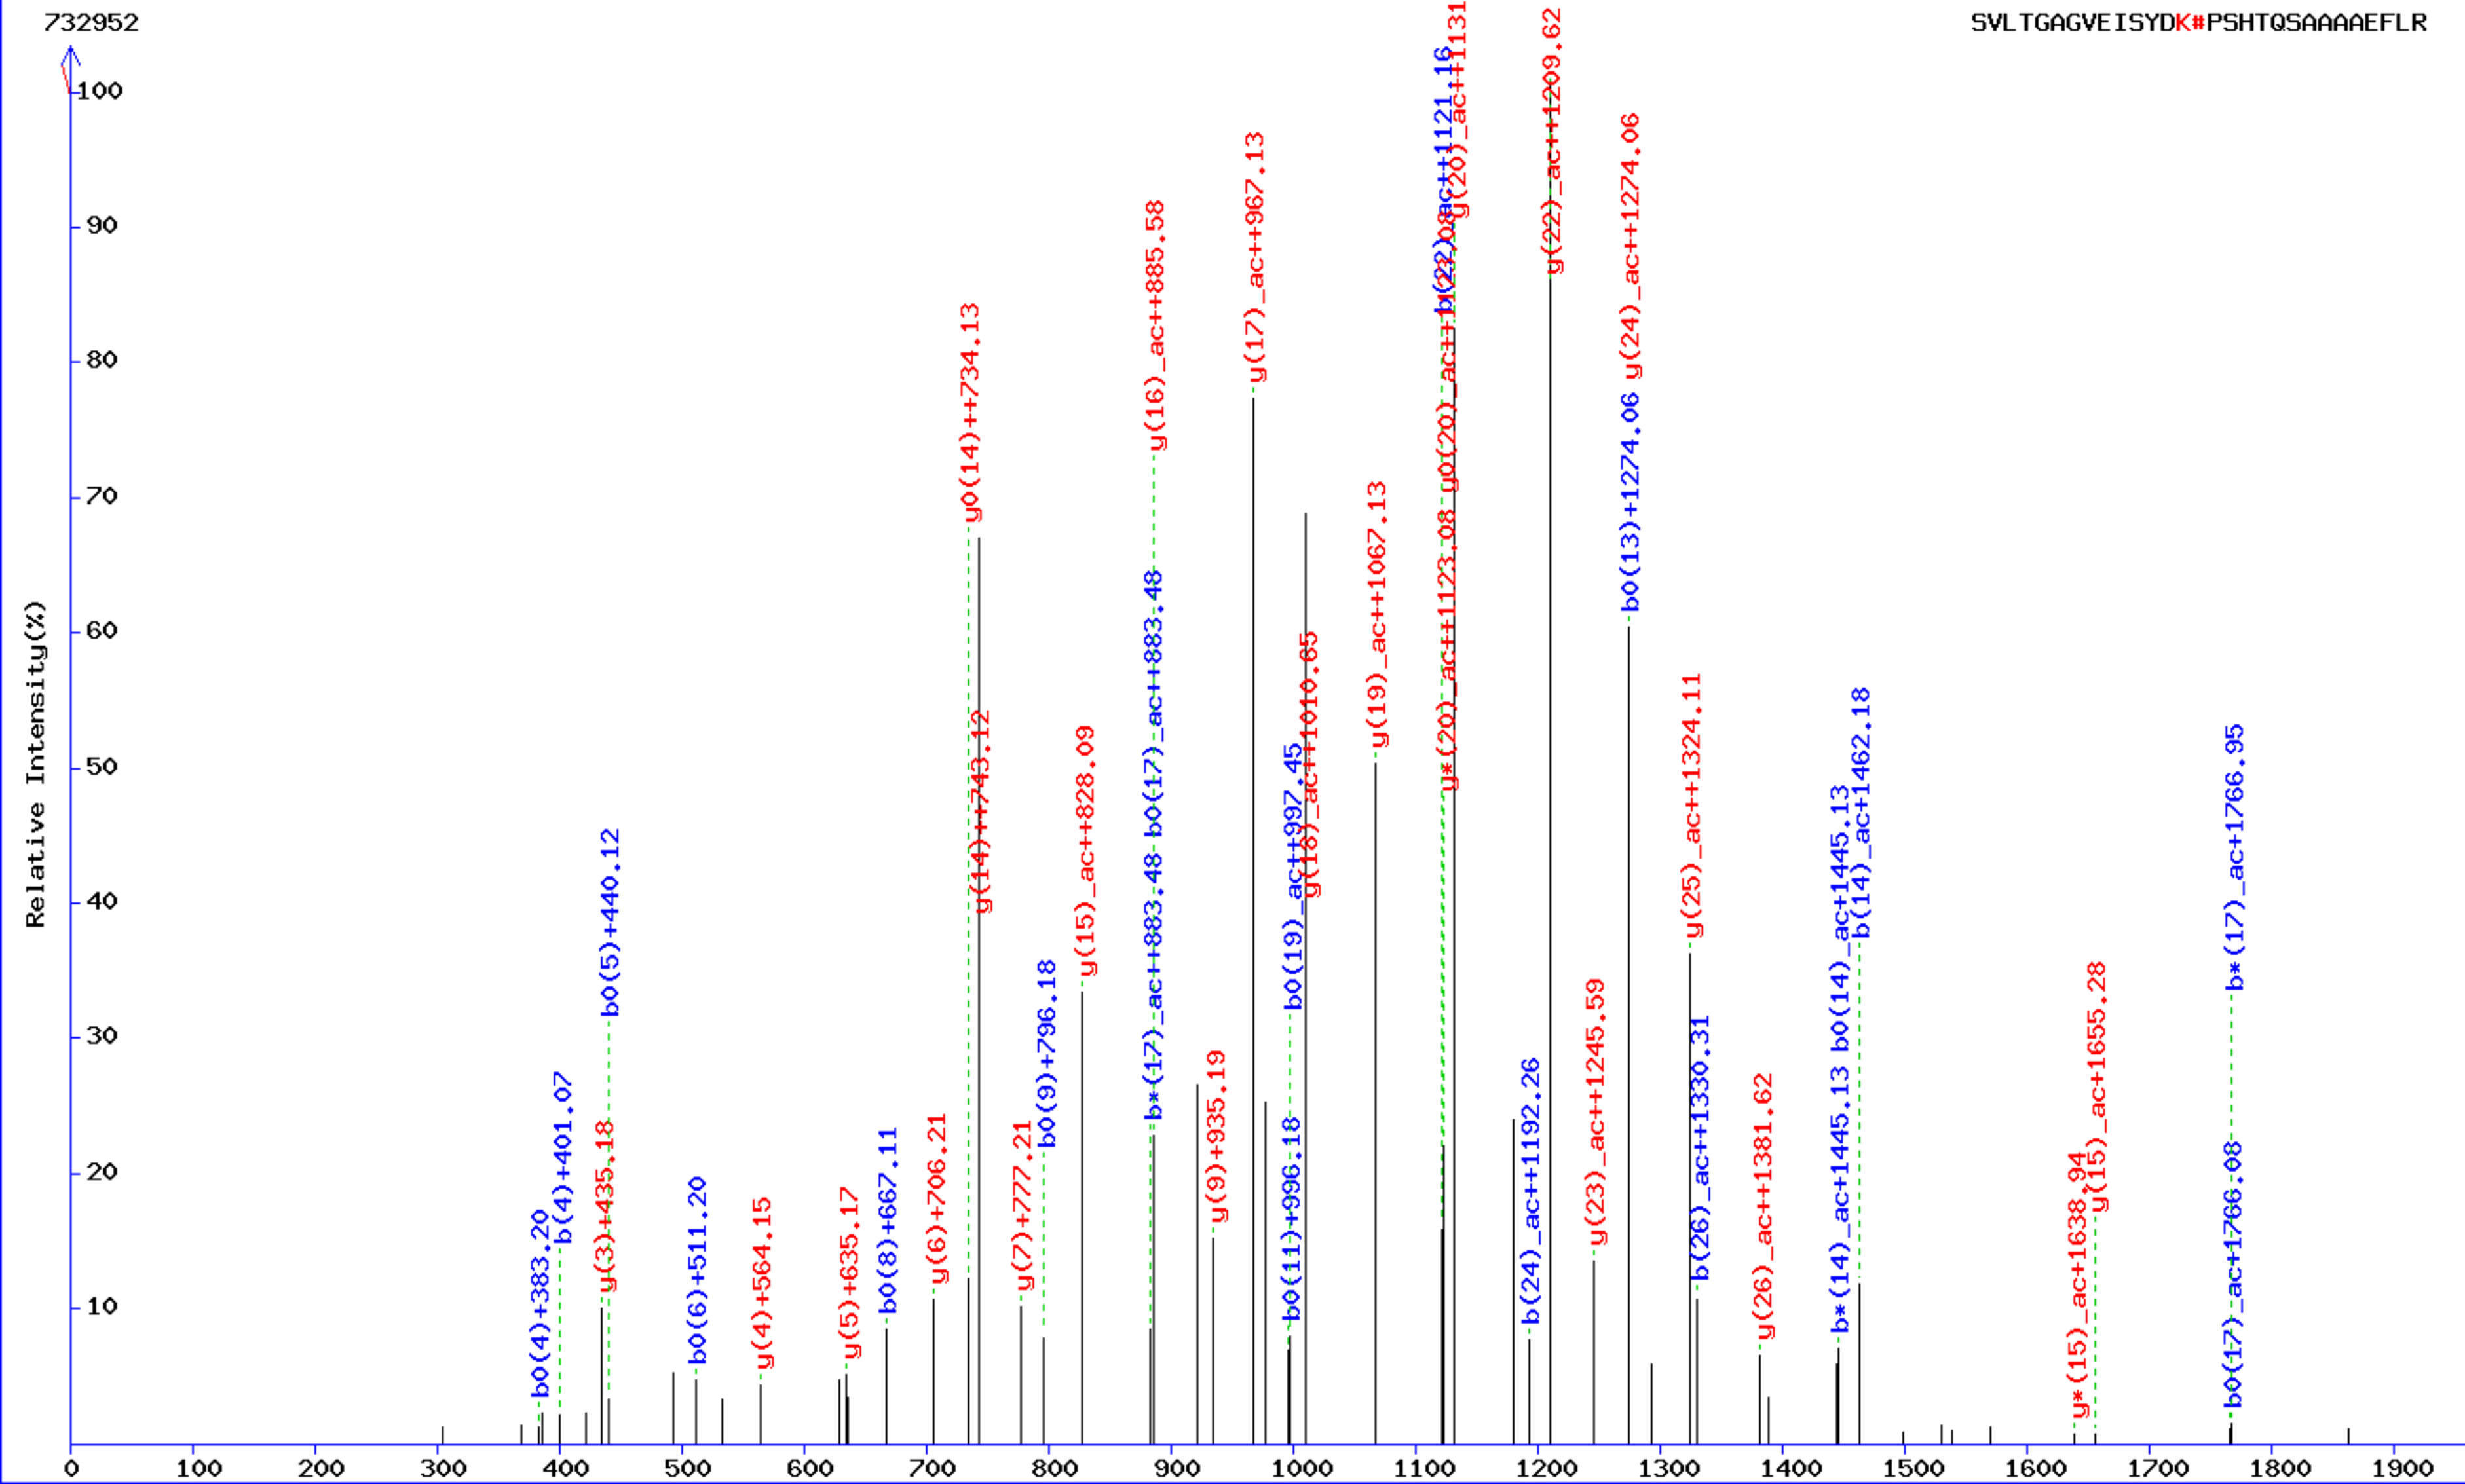

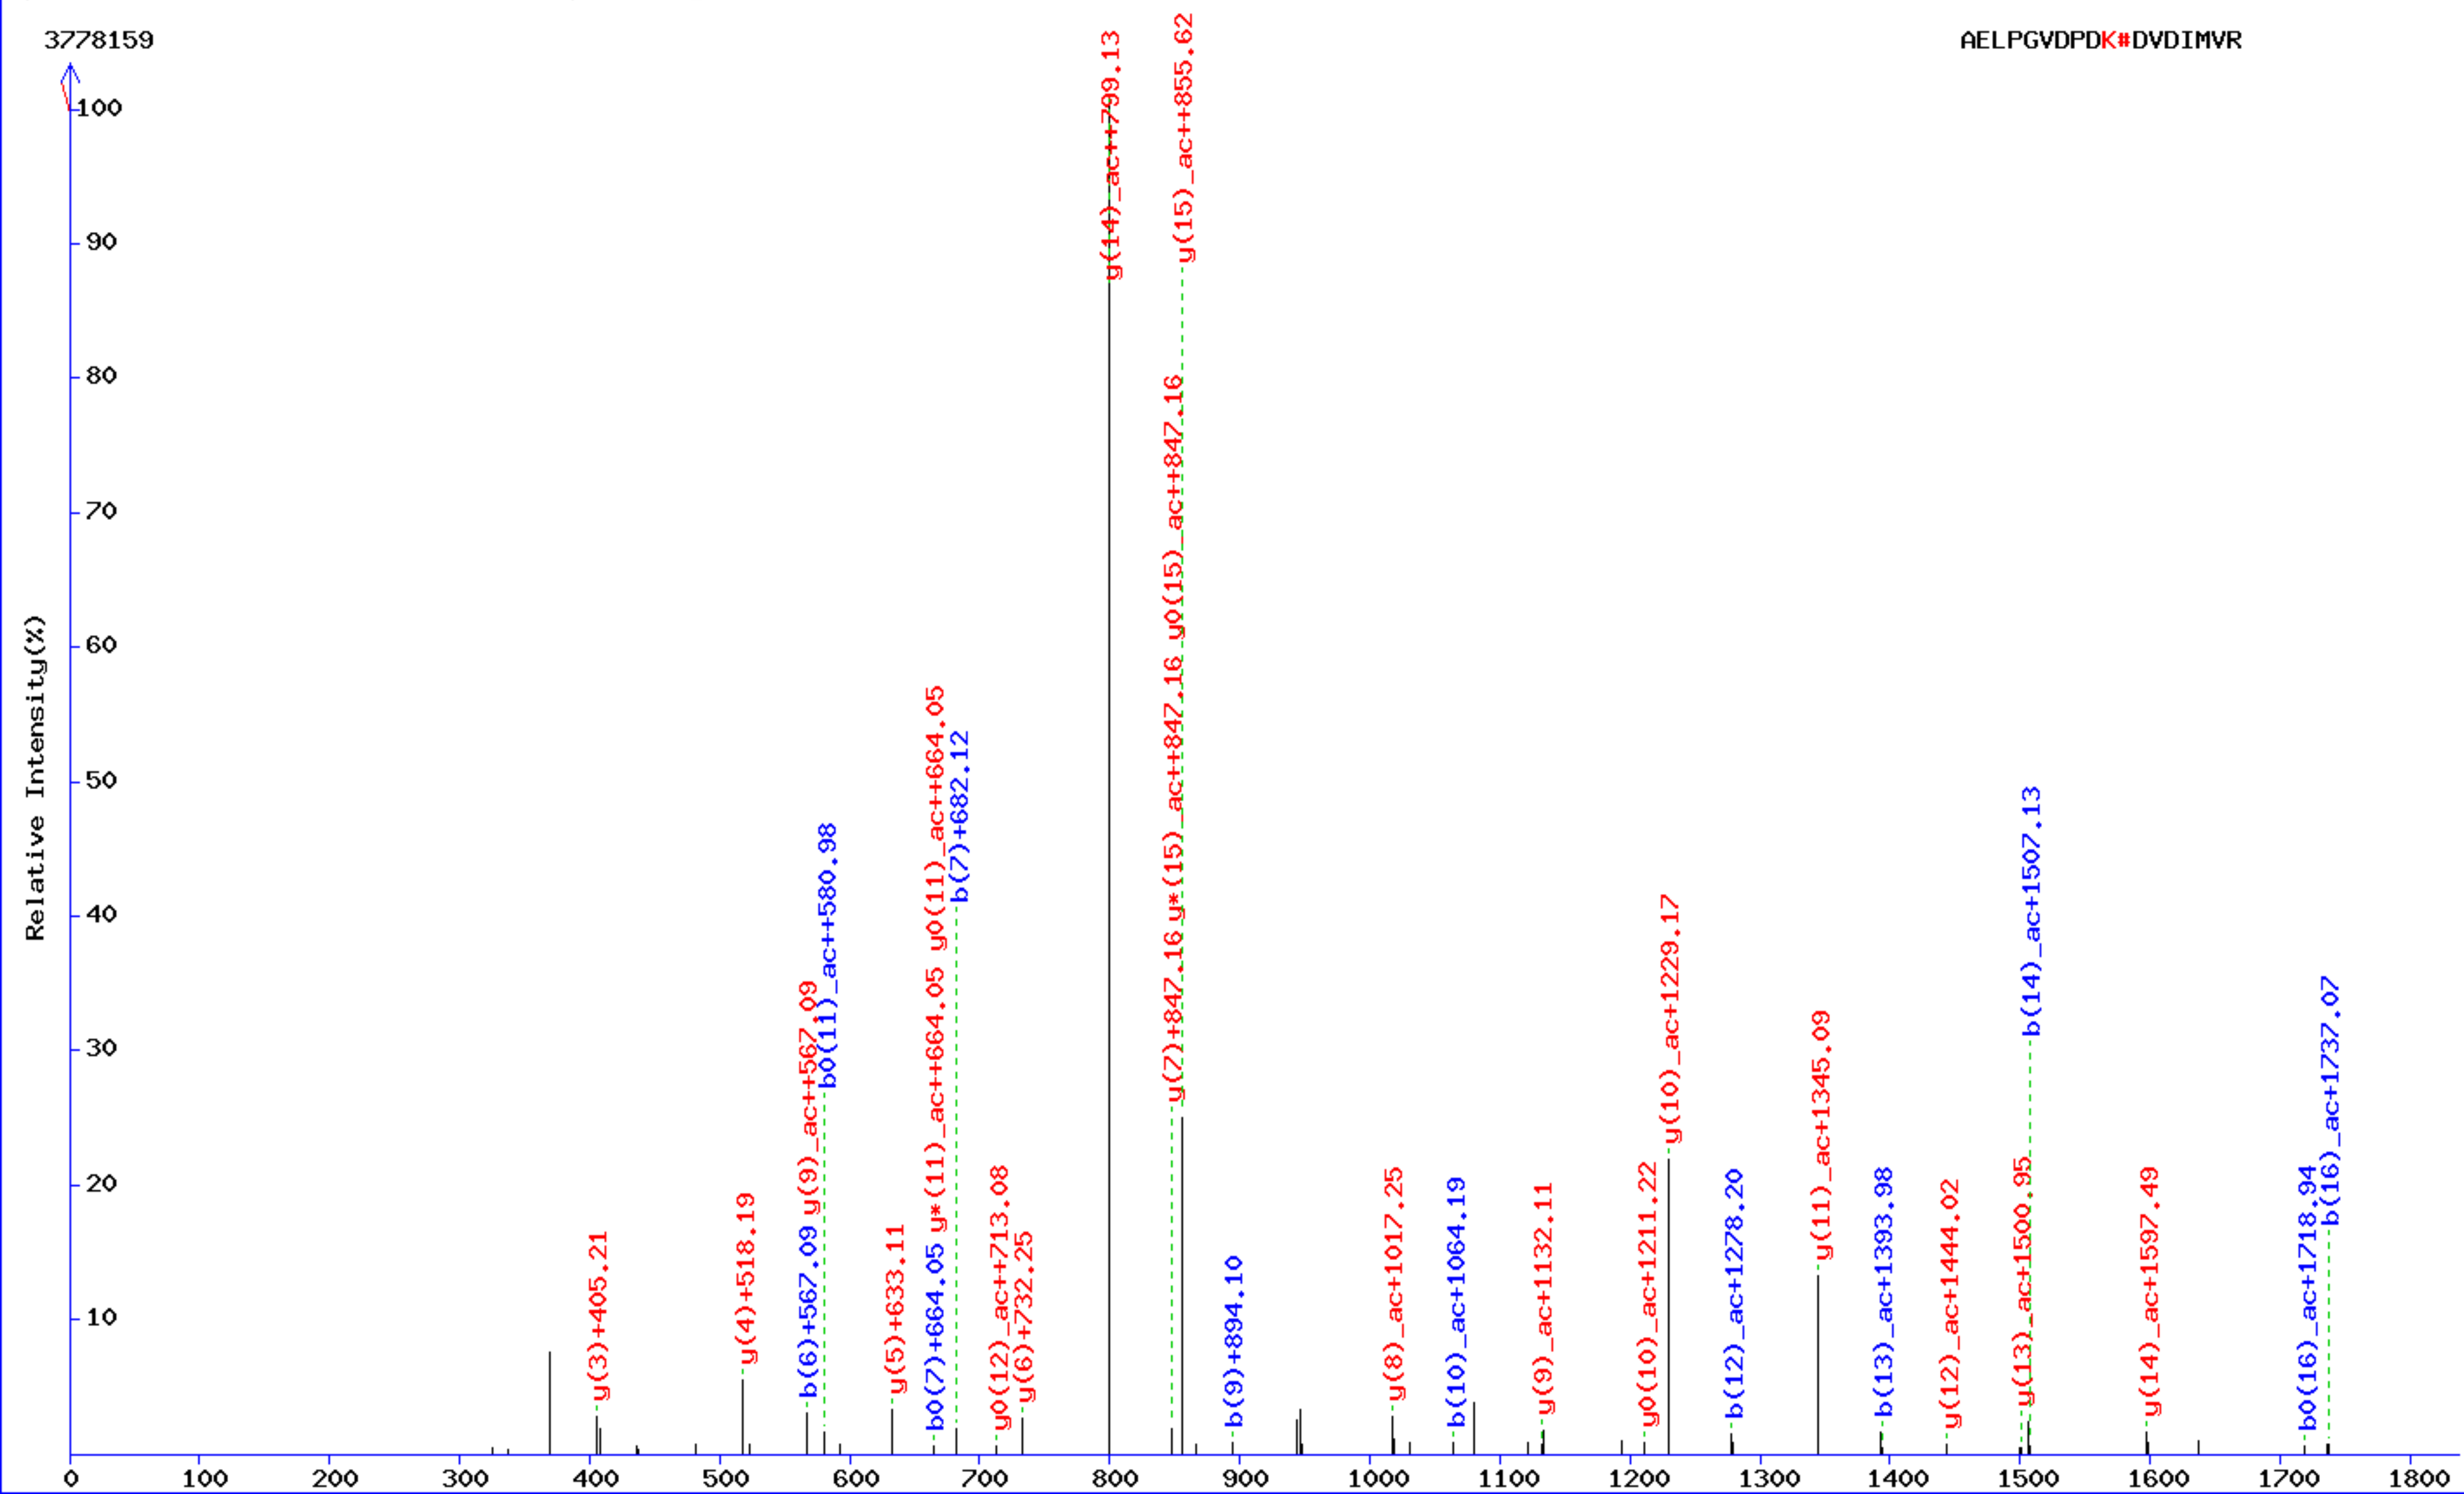



gi|148663111 MRA\_3289 S-adenosyl-L-homocysteine hydrolase

DIIMLEHIK#AMK

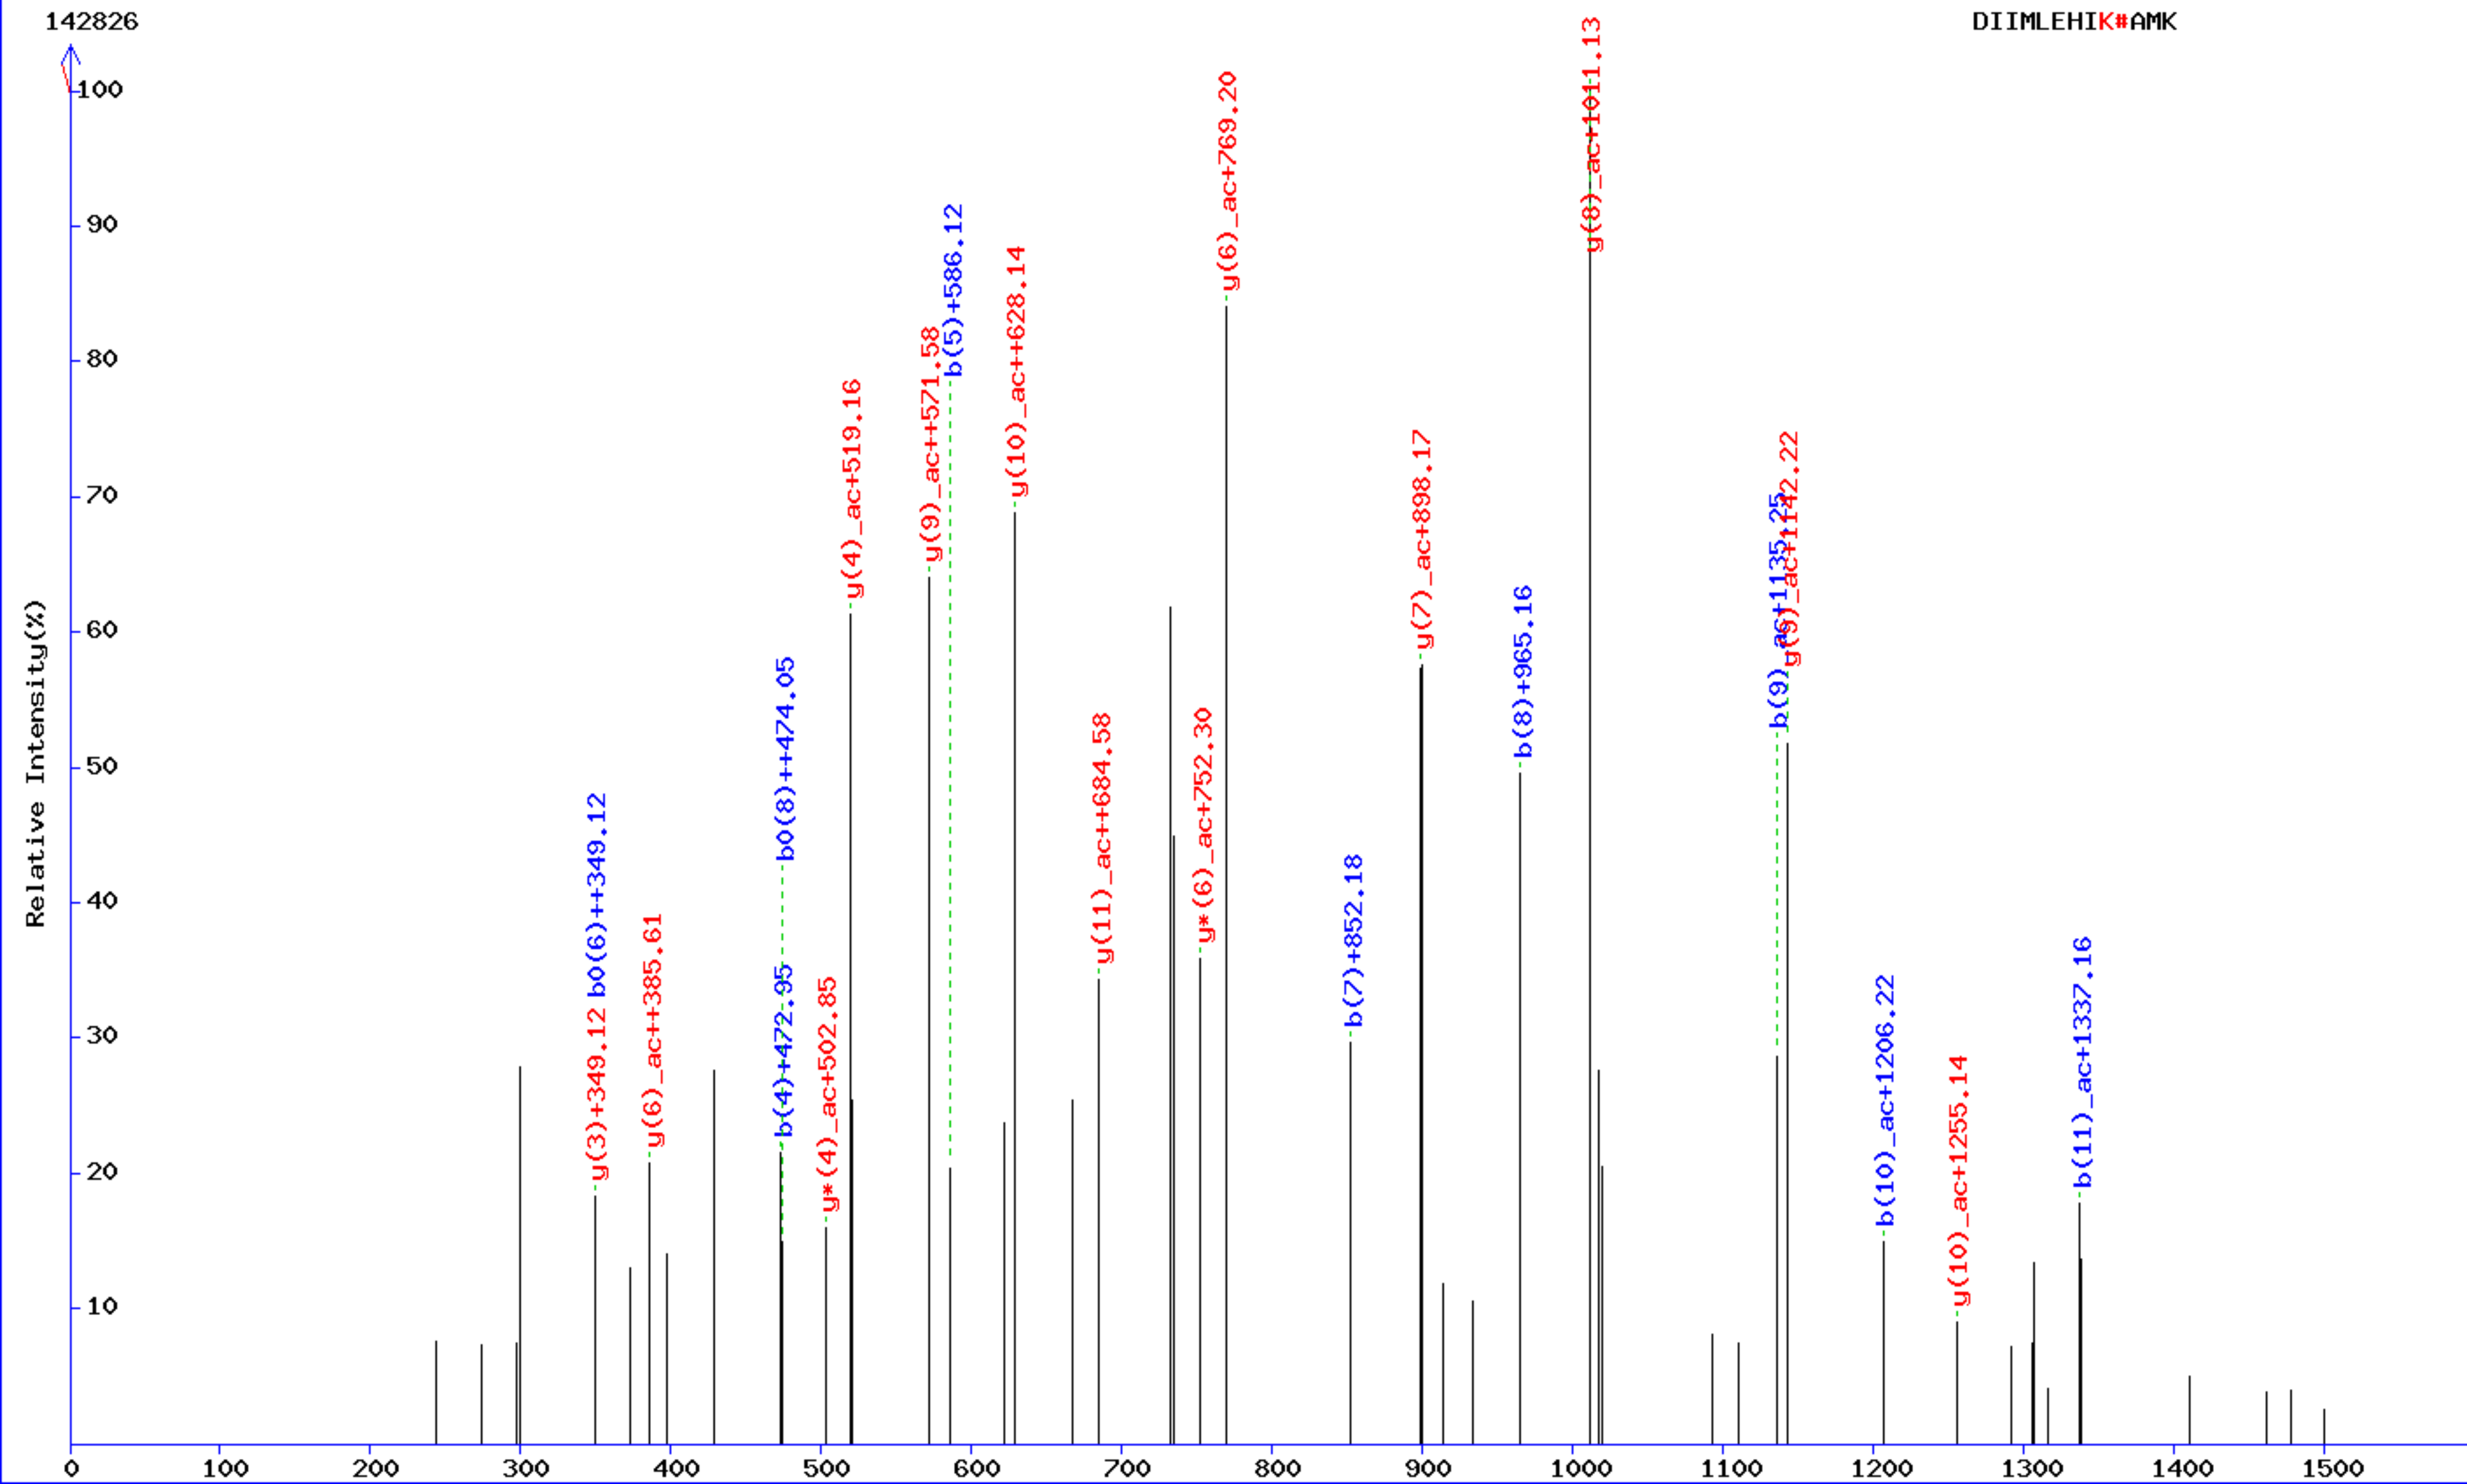

gi|148661183 MRA\_1401 S-adenosylmethionine synthetase

LDTVVISTQHAADIDLEK#TLDPDIR

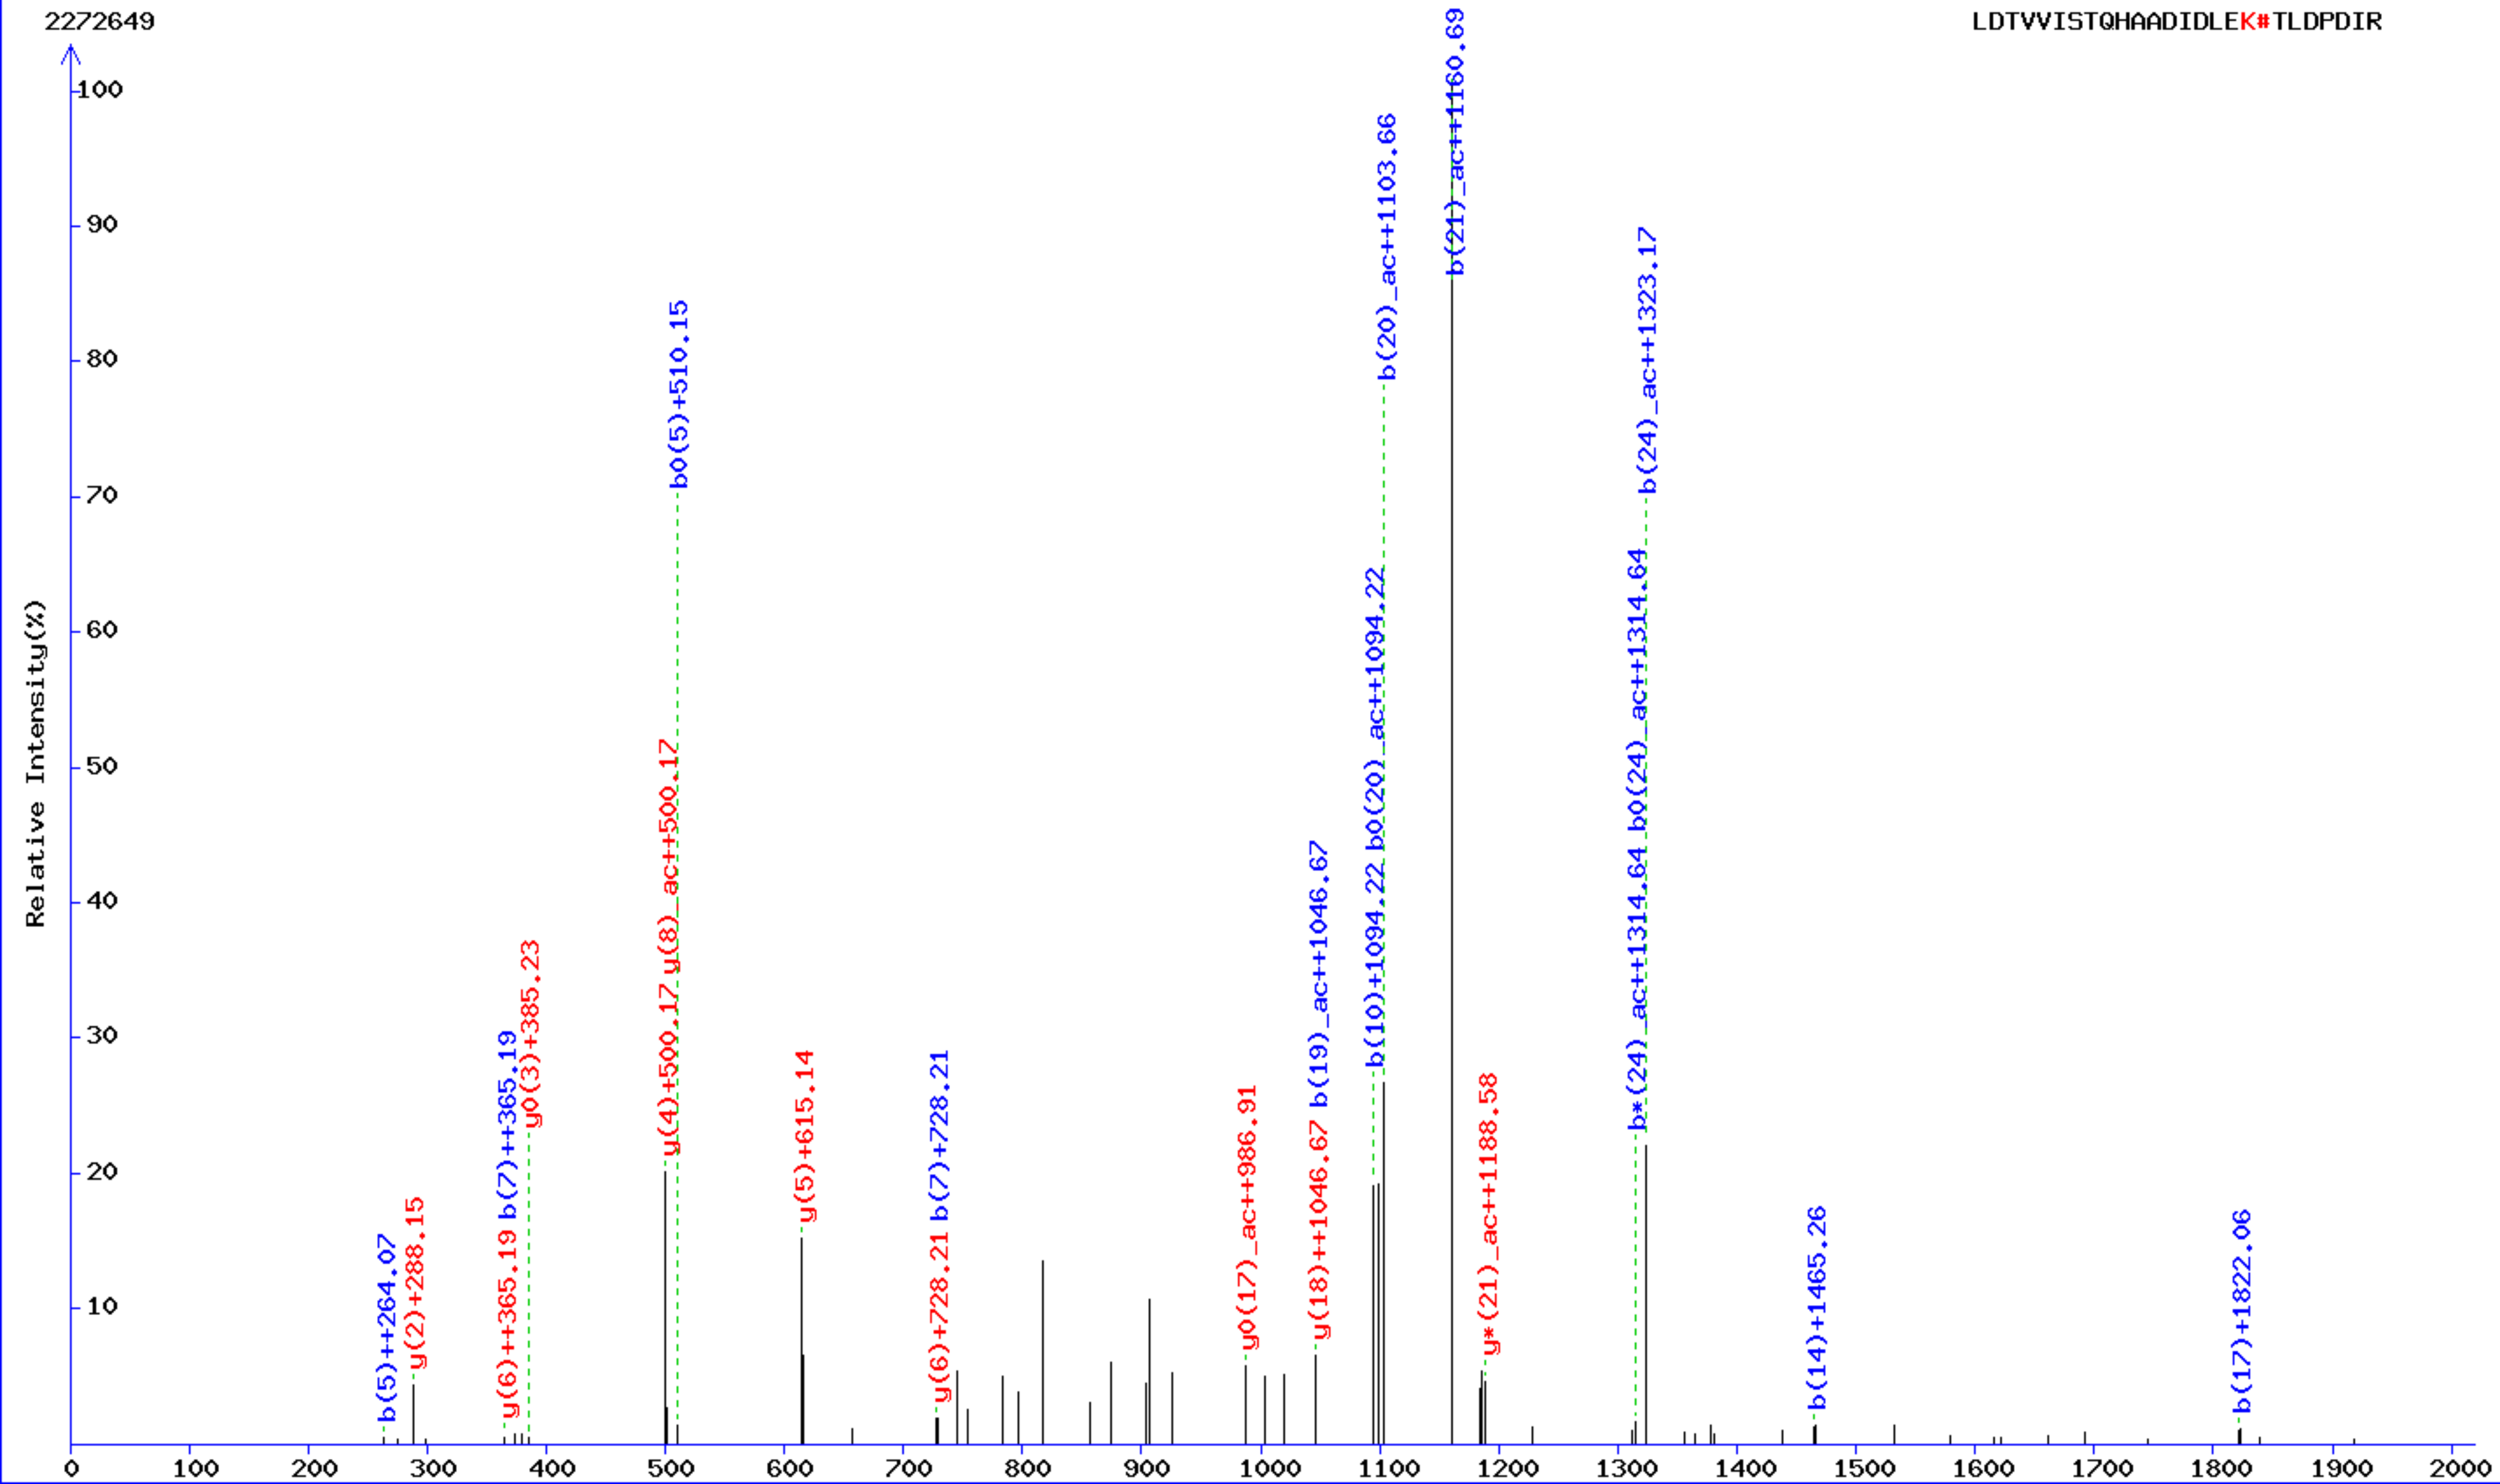

# gi|148661329 MRA\_1545 hypothetical protein

DVVAAVSNAGGFGILGAVAHSPK#R

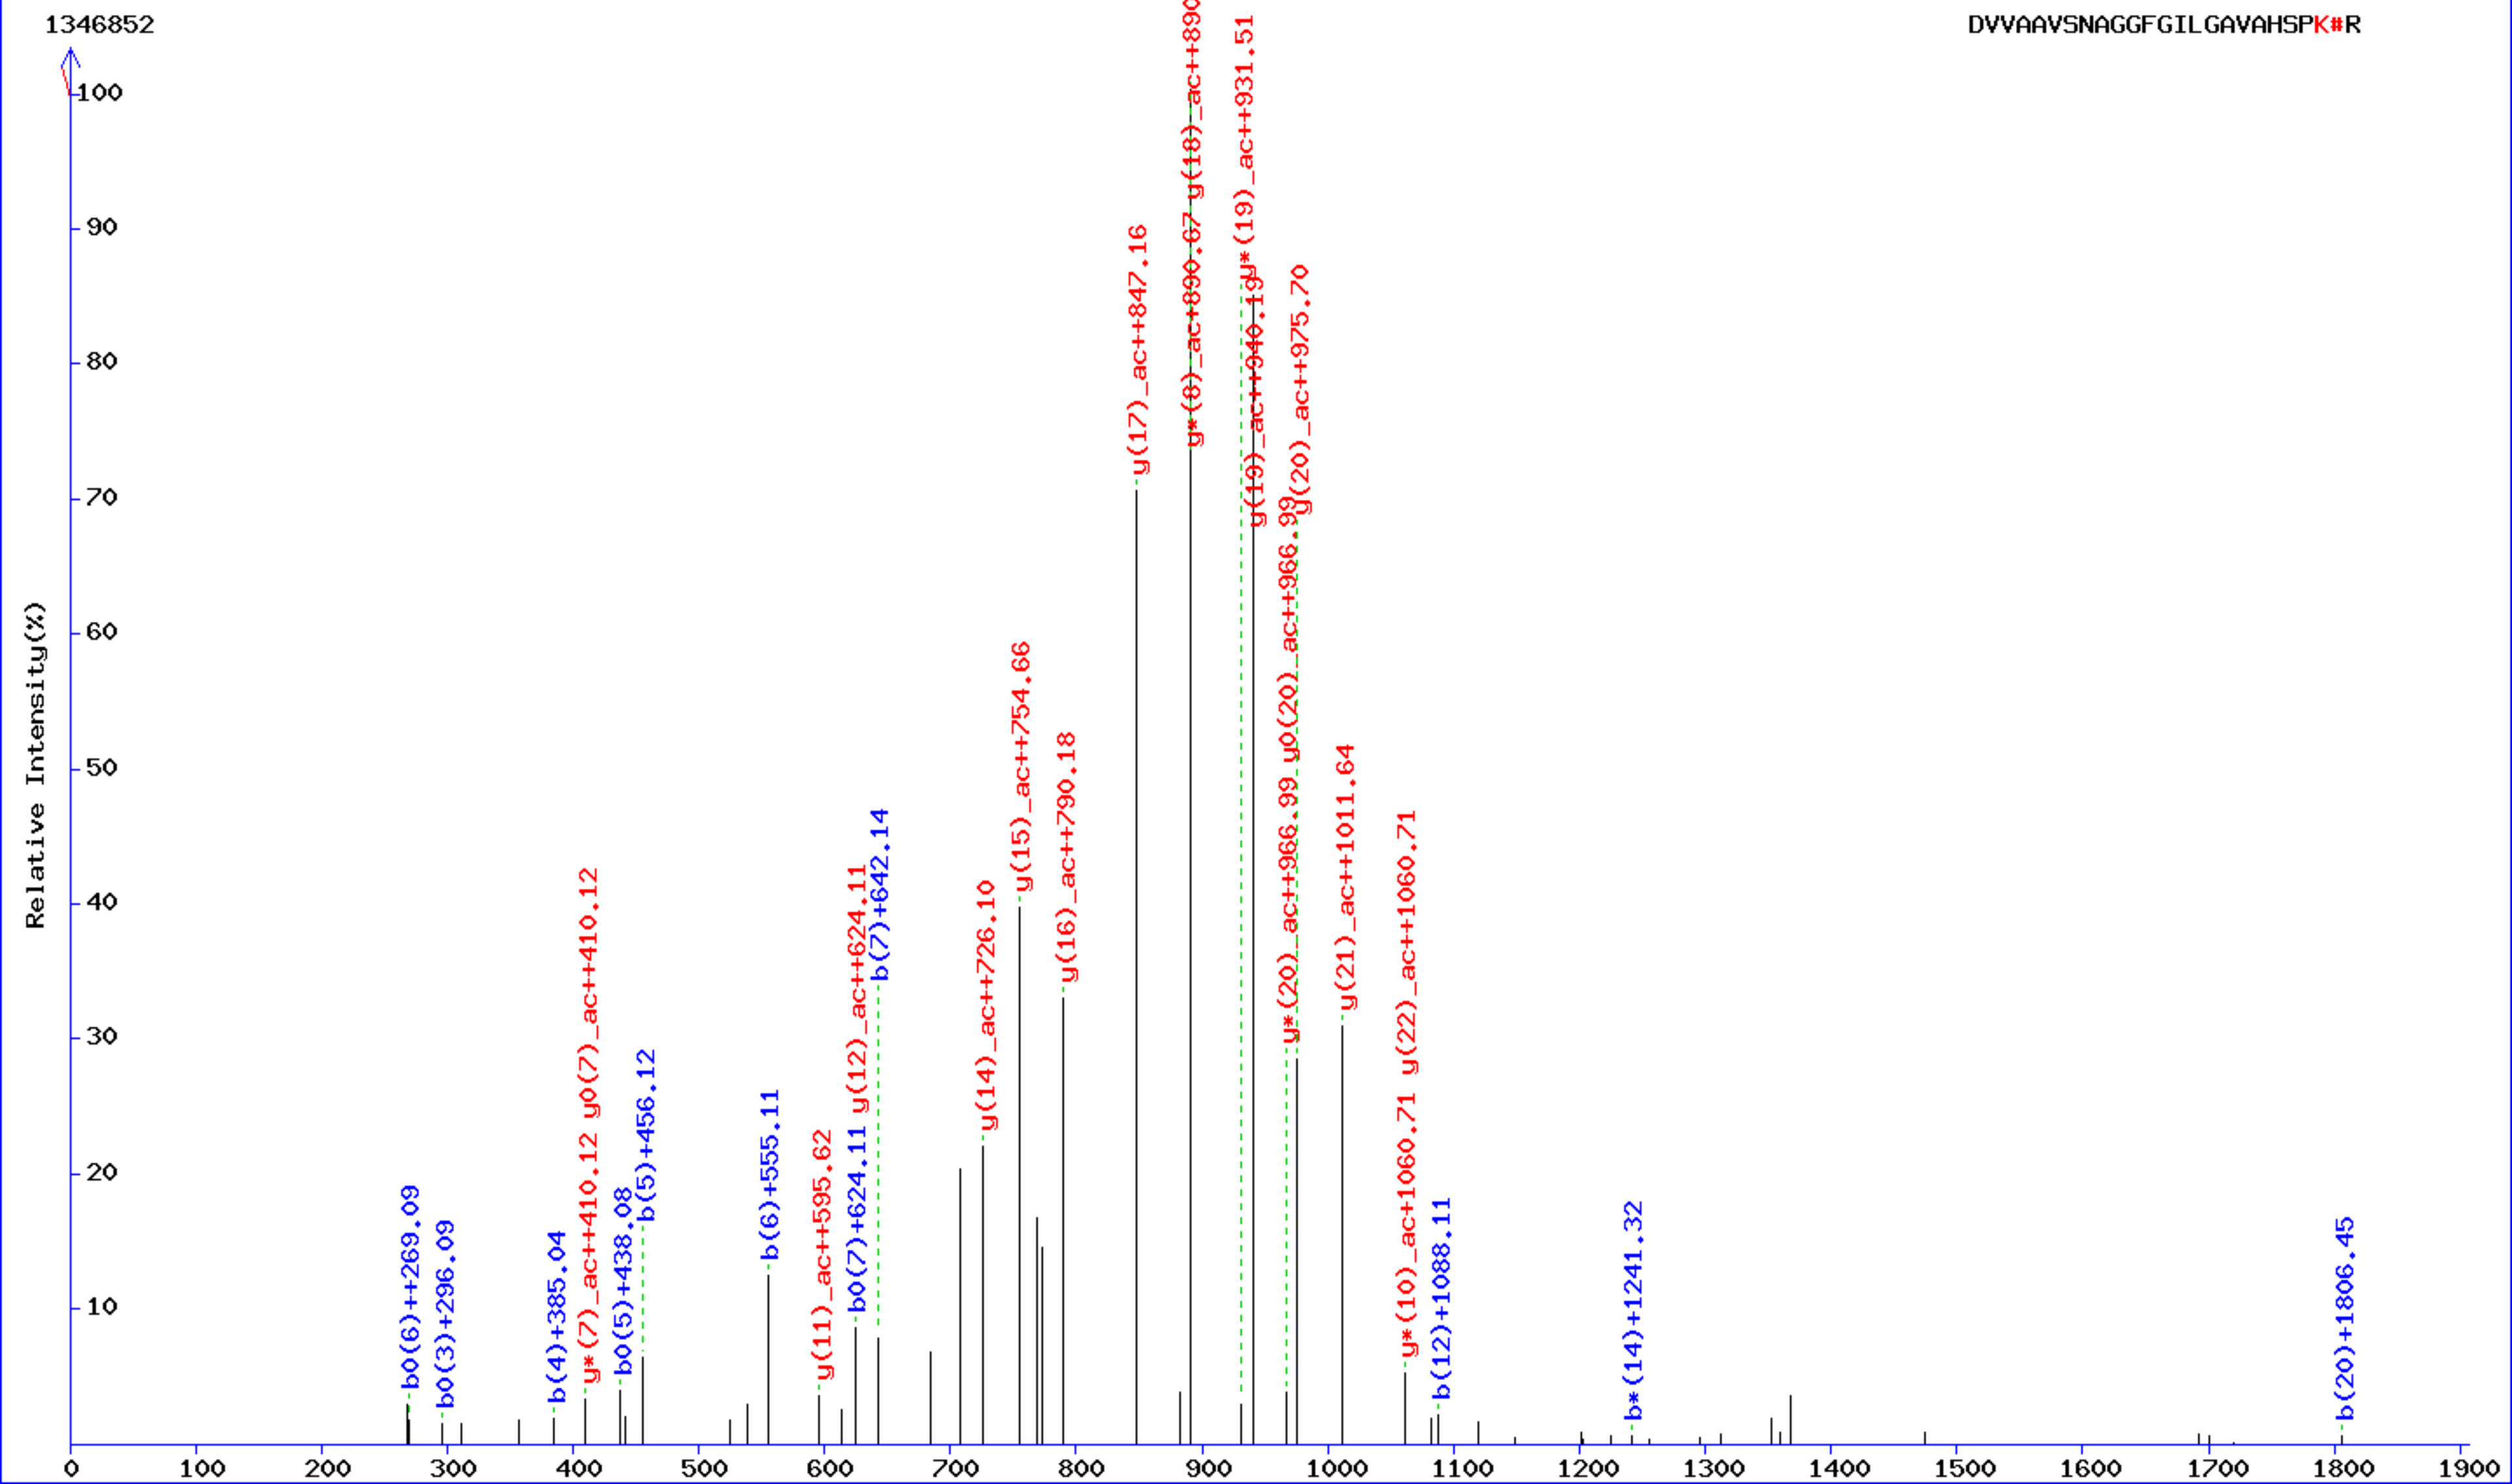

gi|148661080 MRA\_1300 arginyl-tRNA synthetase

NAAELALIPDTNHLELLNHDK#EGTLLR

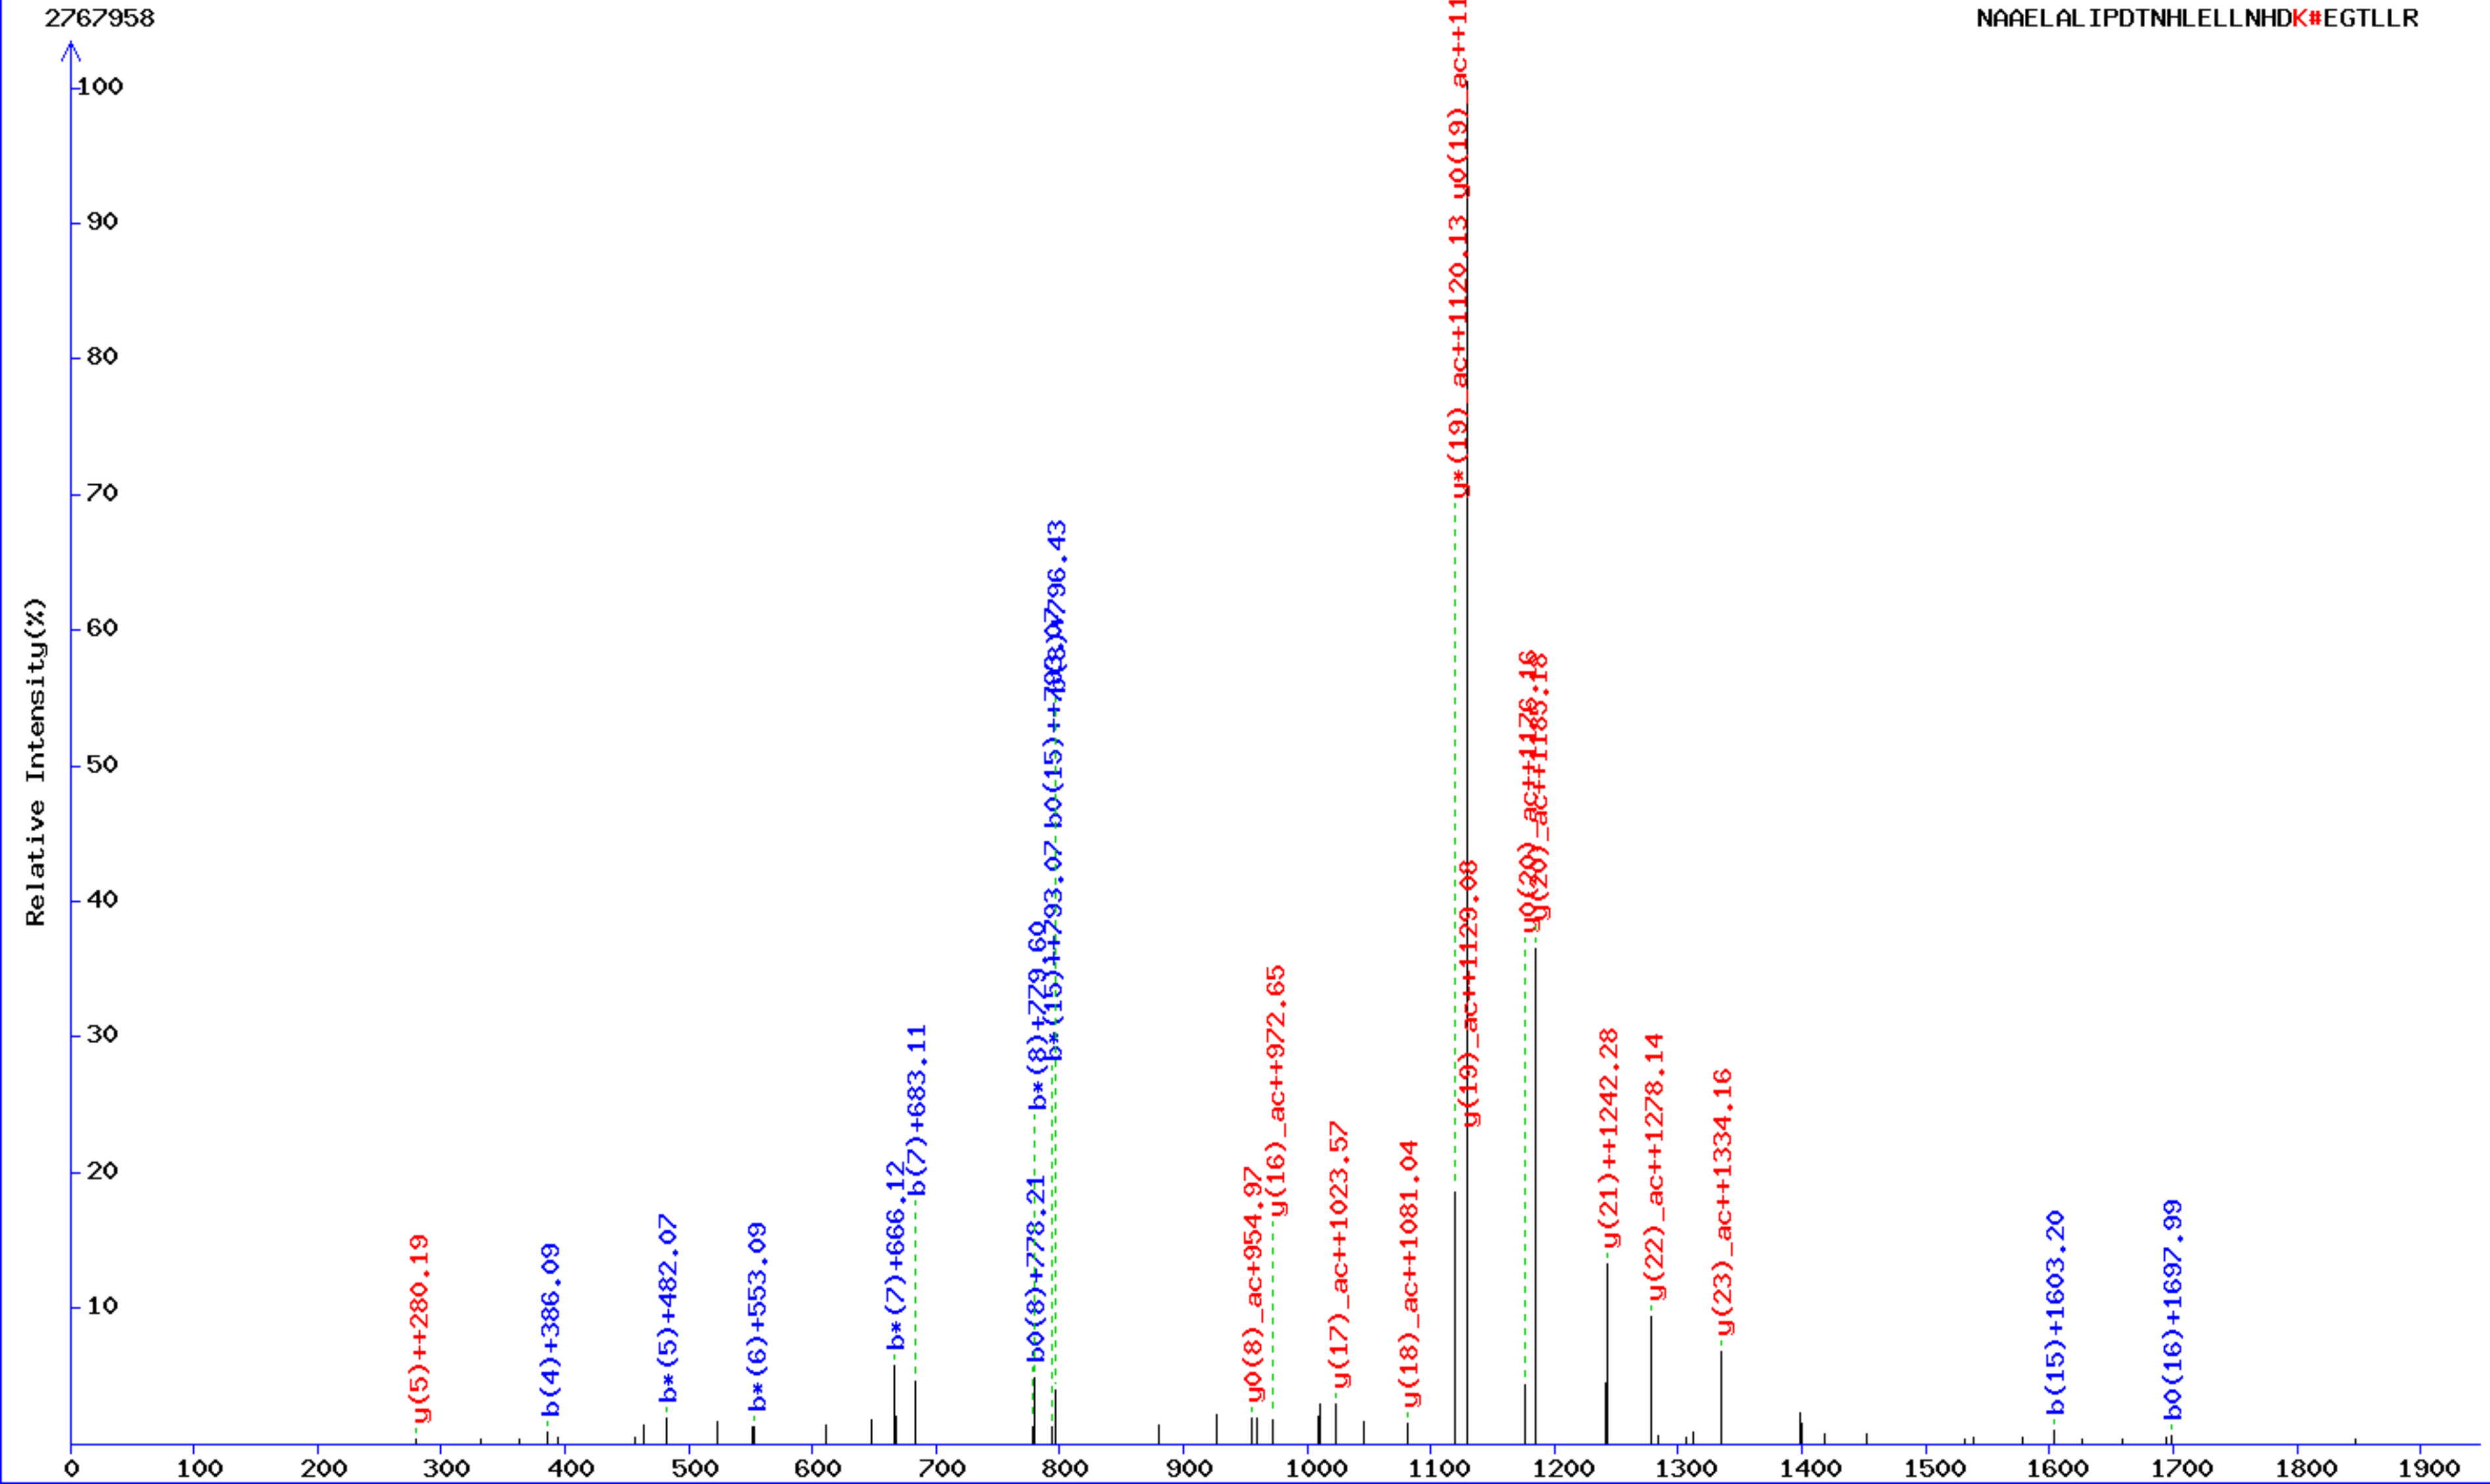

# gi|148660331 MRA\_0569 polyprenyl-diphosphate synthase GrcC1

QADEVMSDSLHLHLFNAGGK#R

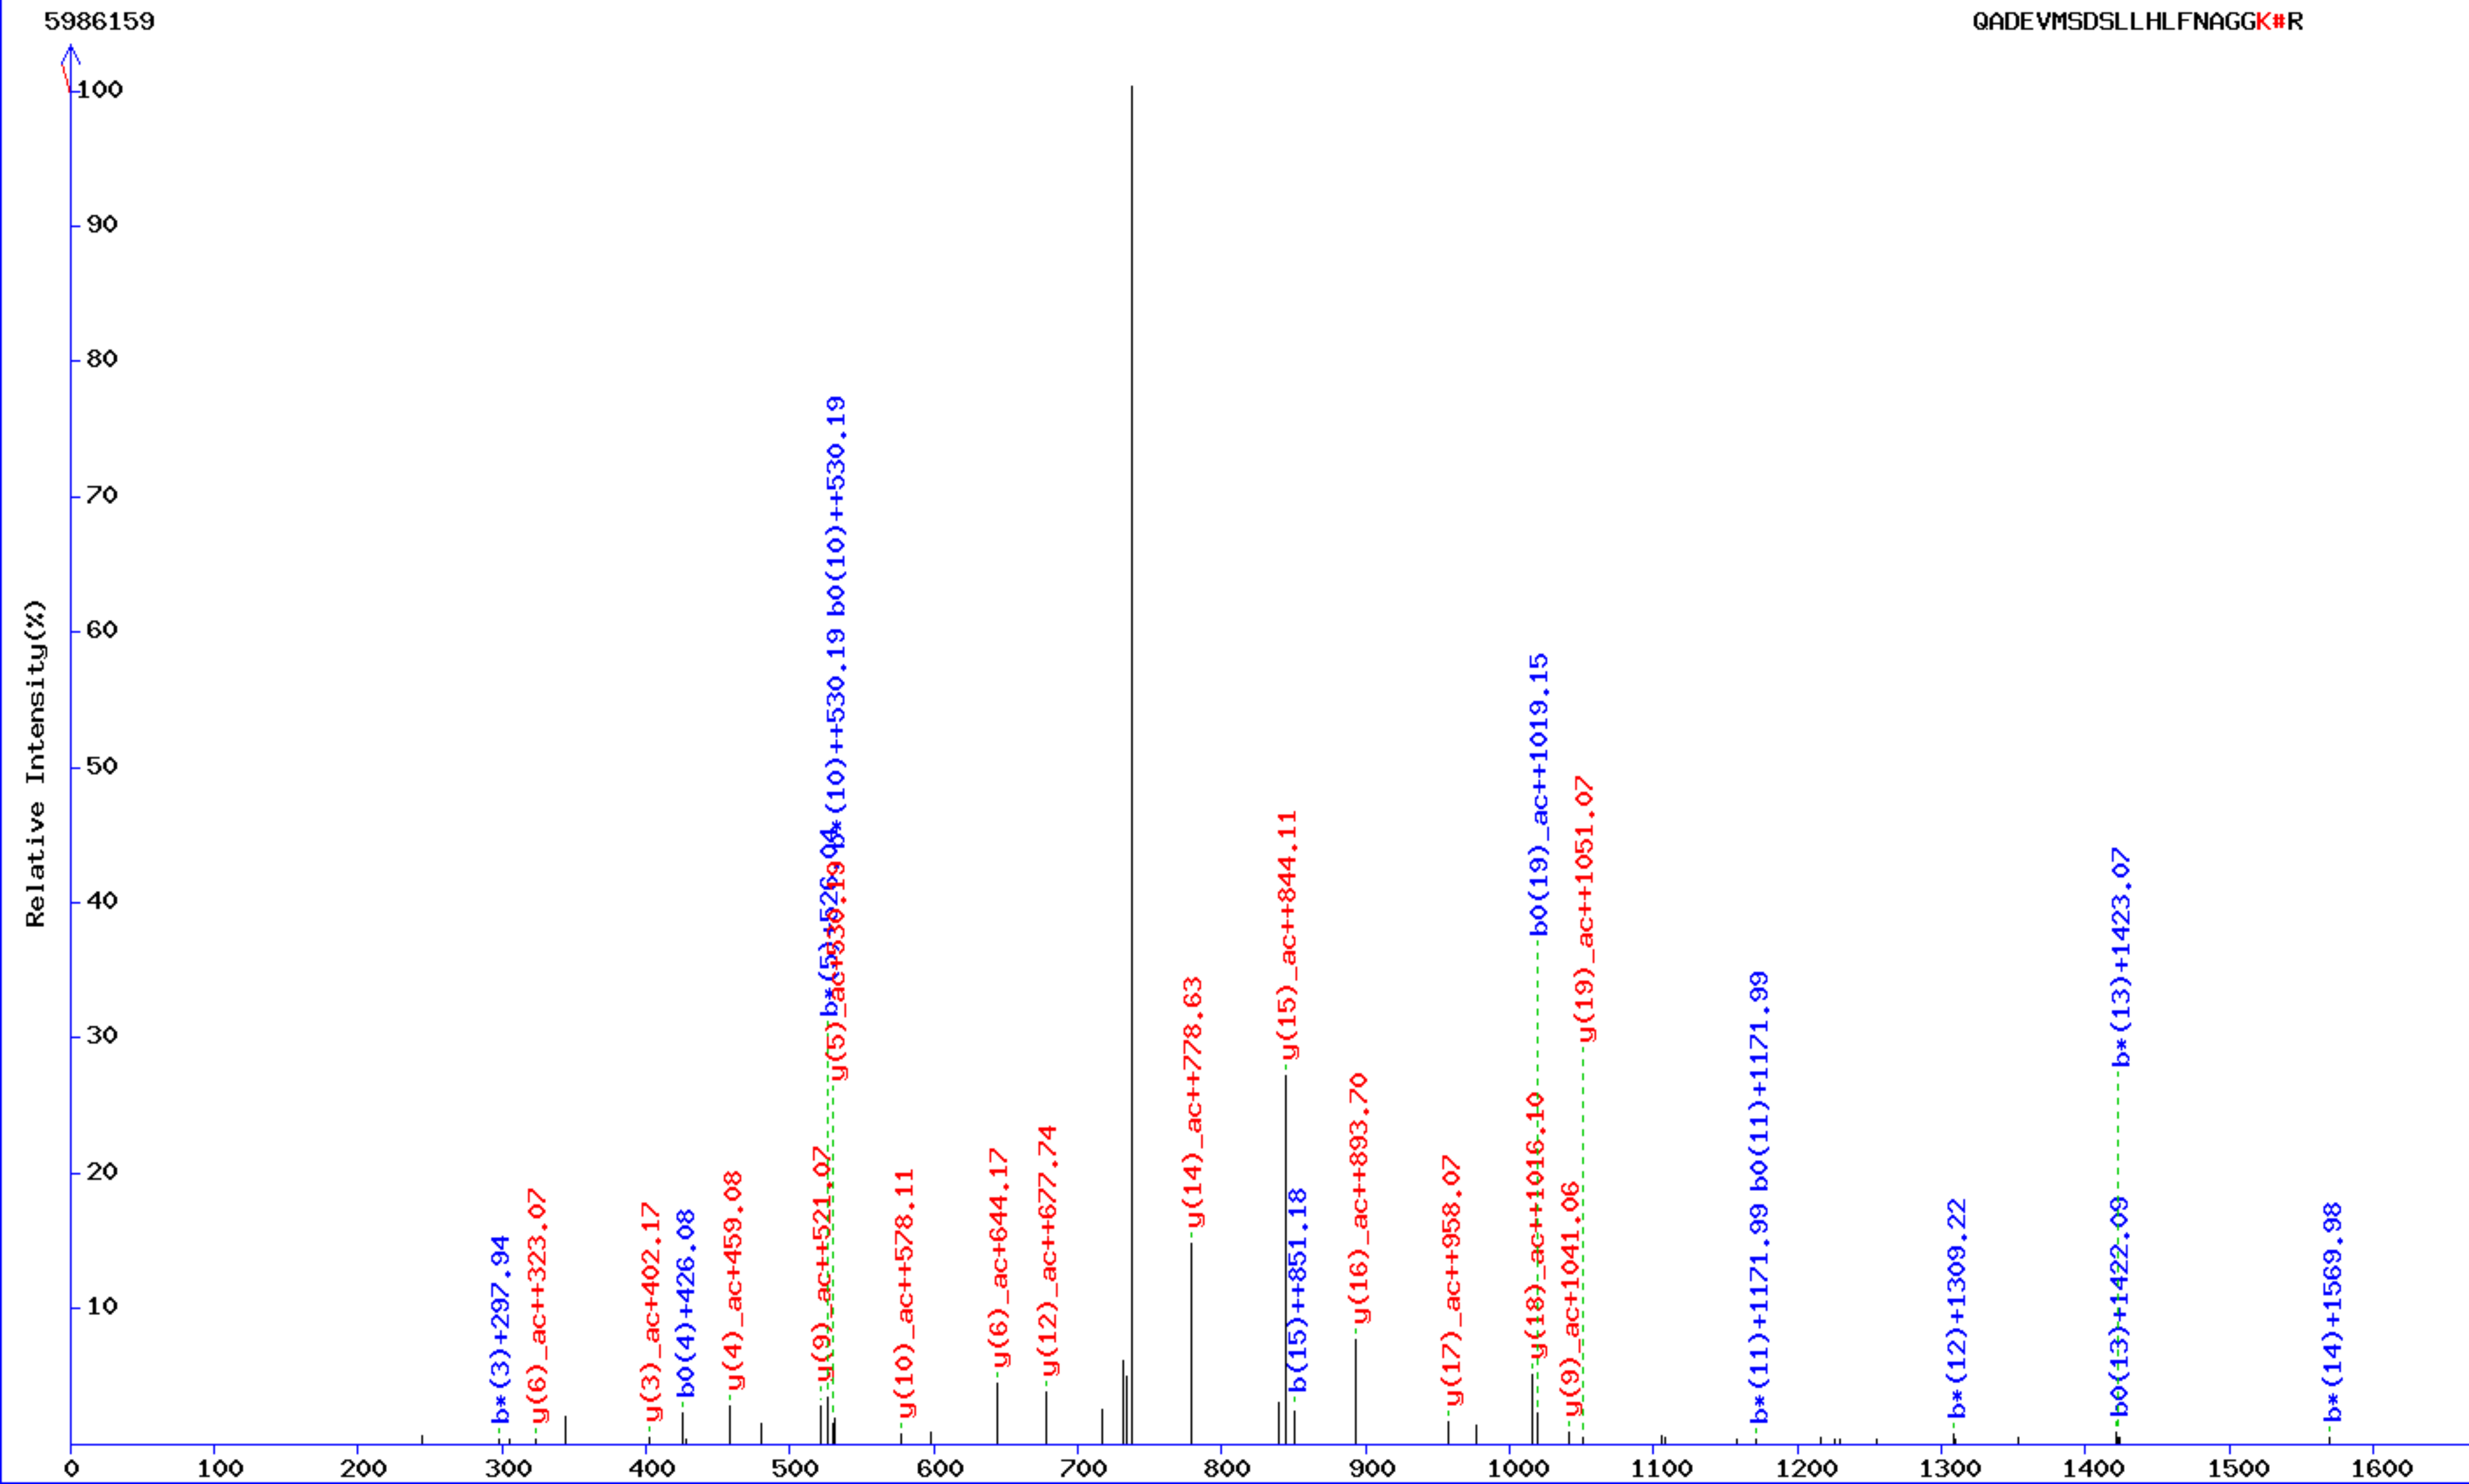

## gi|148662852 MRA\_3031 ketol-acid reductoisomerase

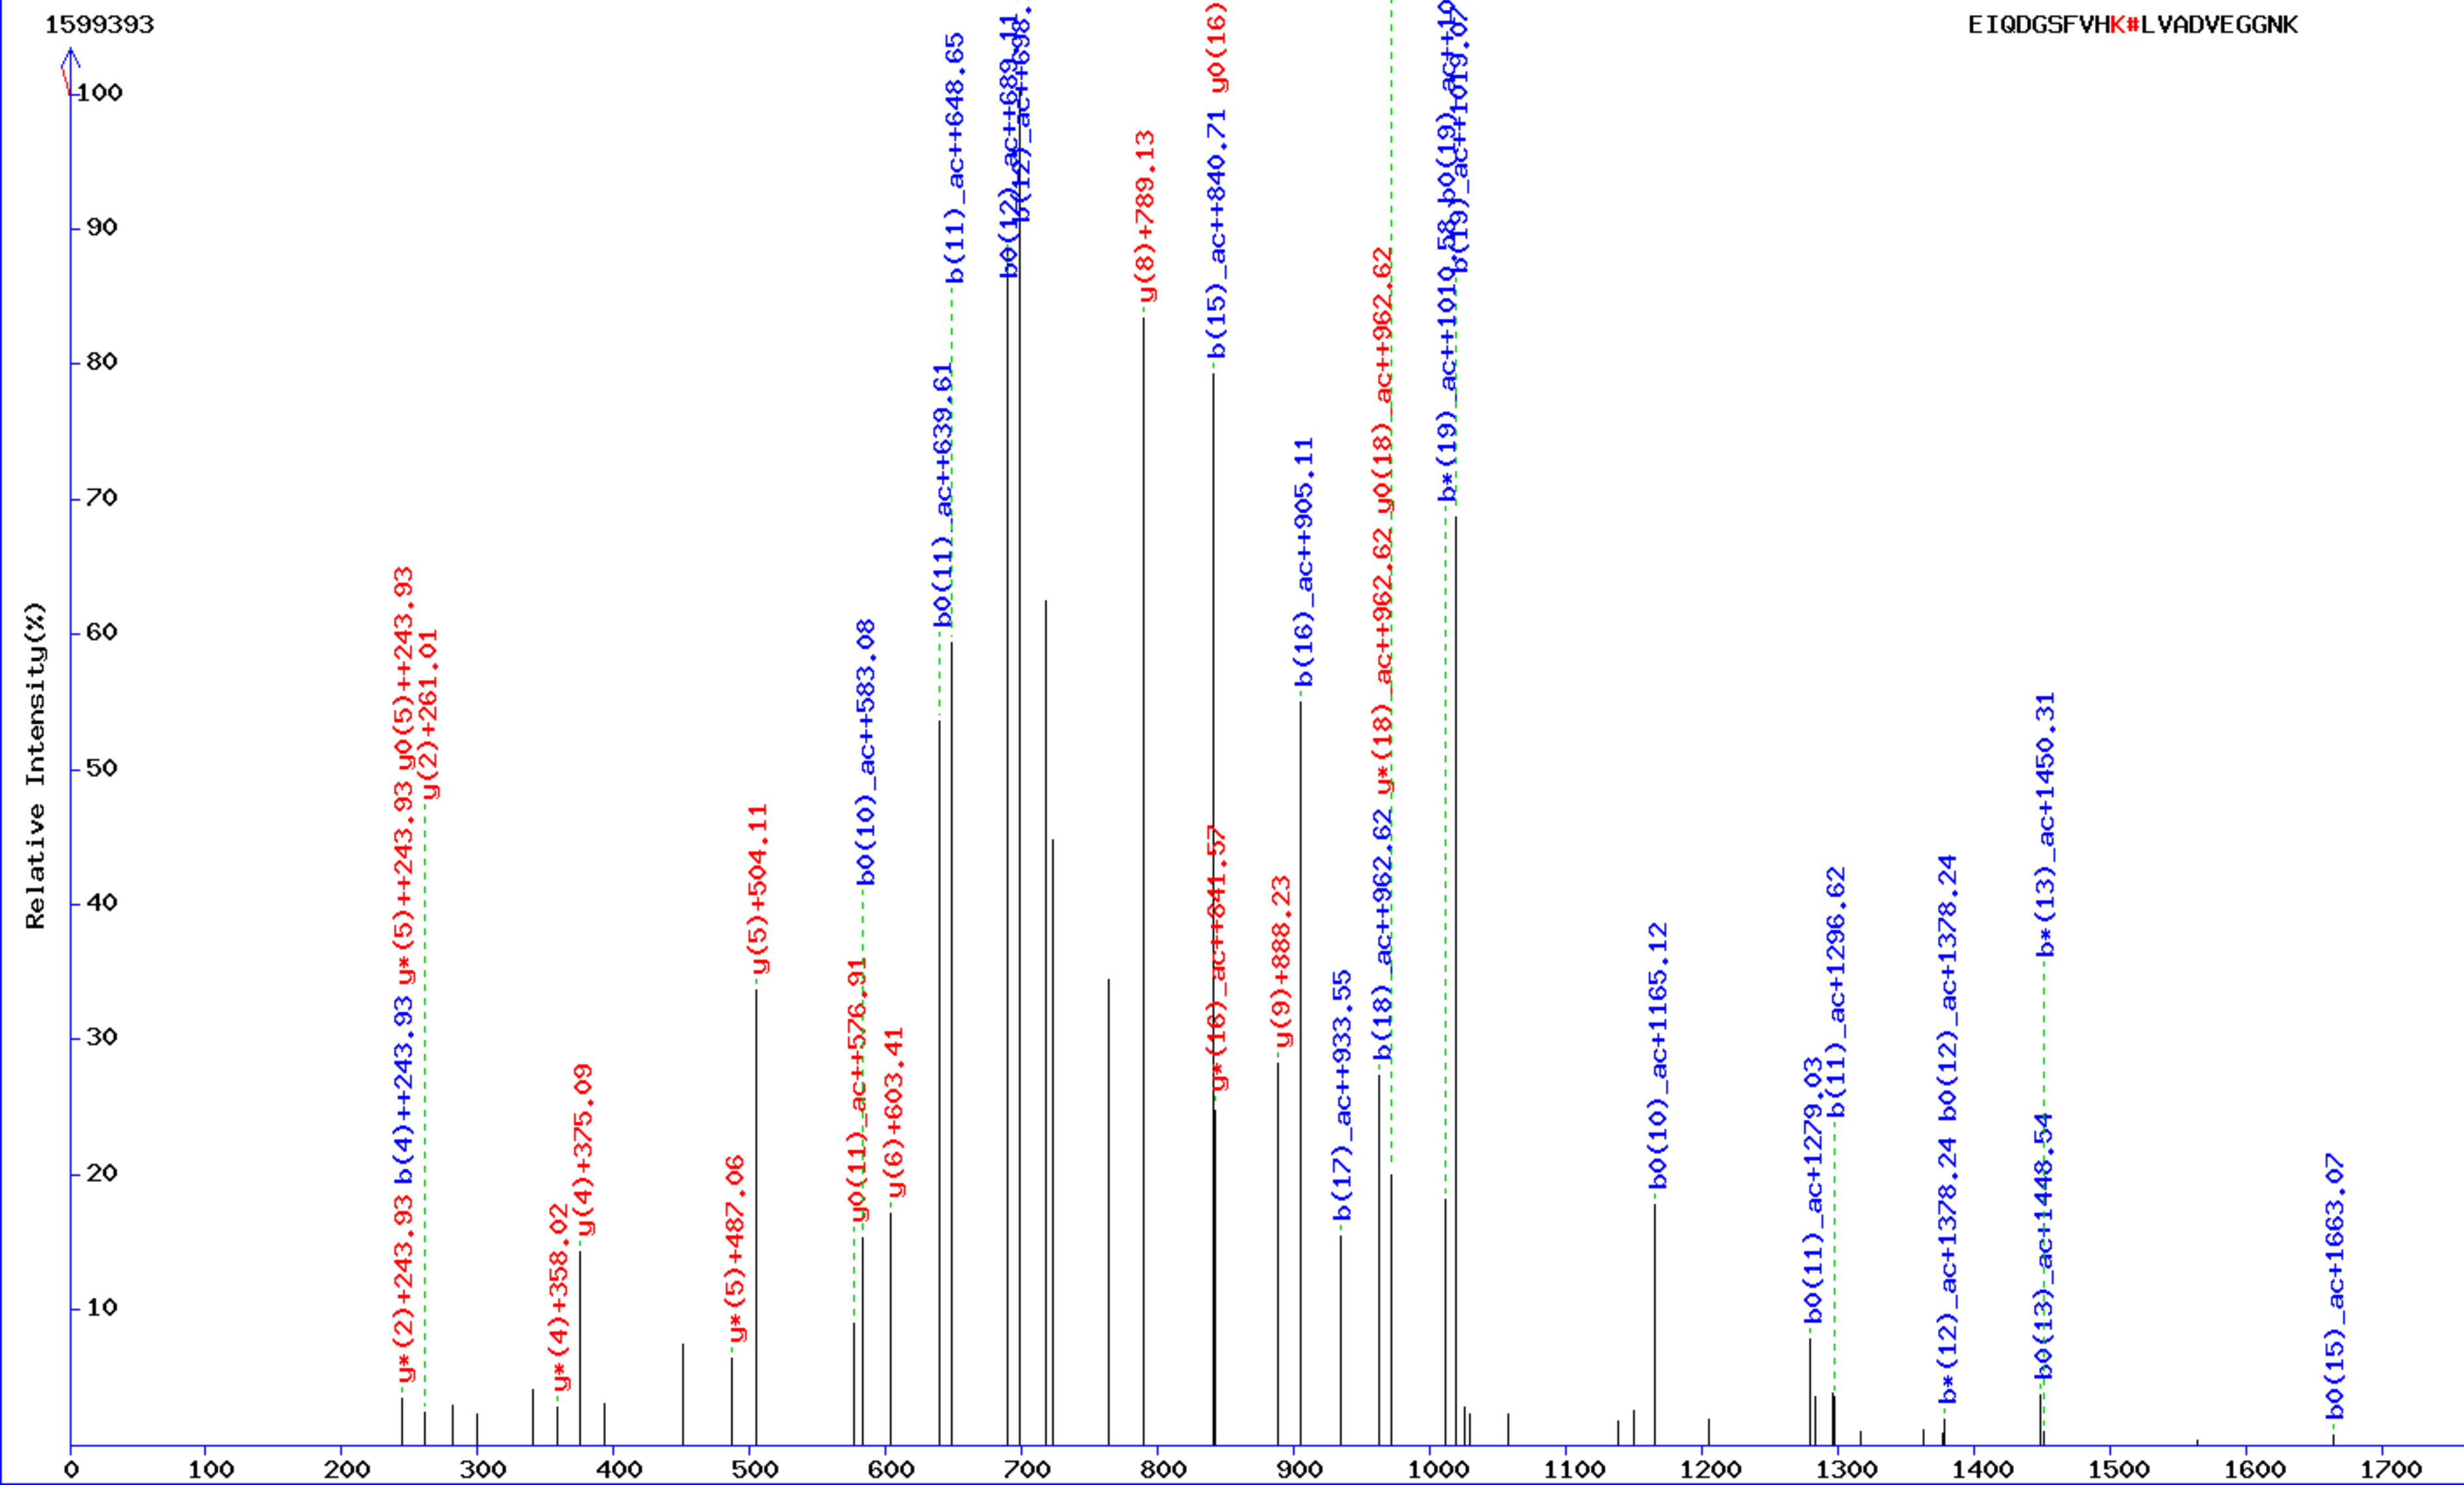

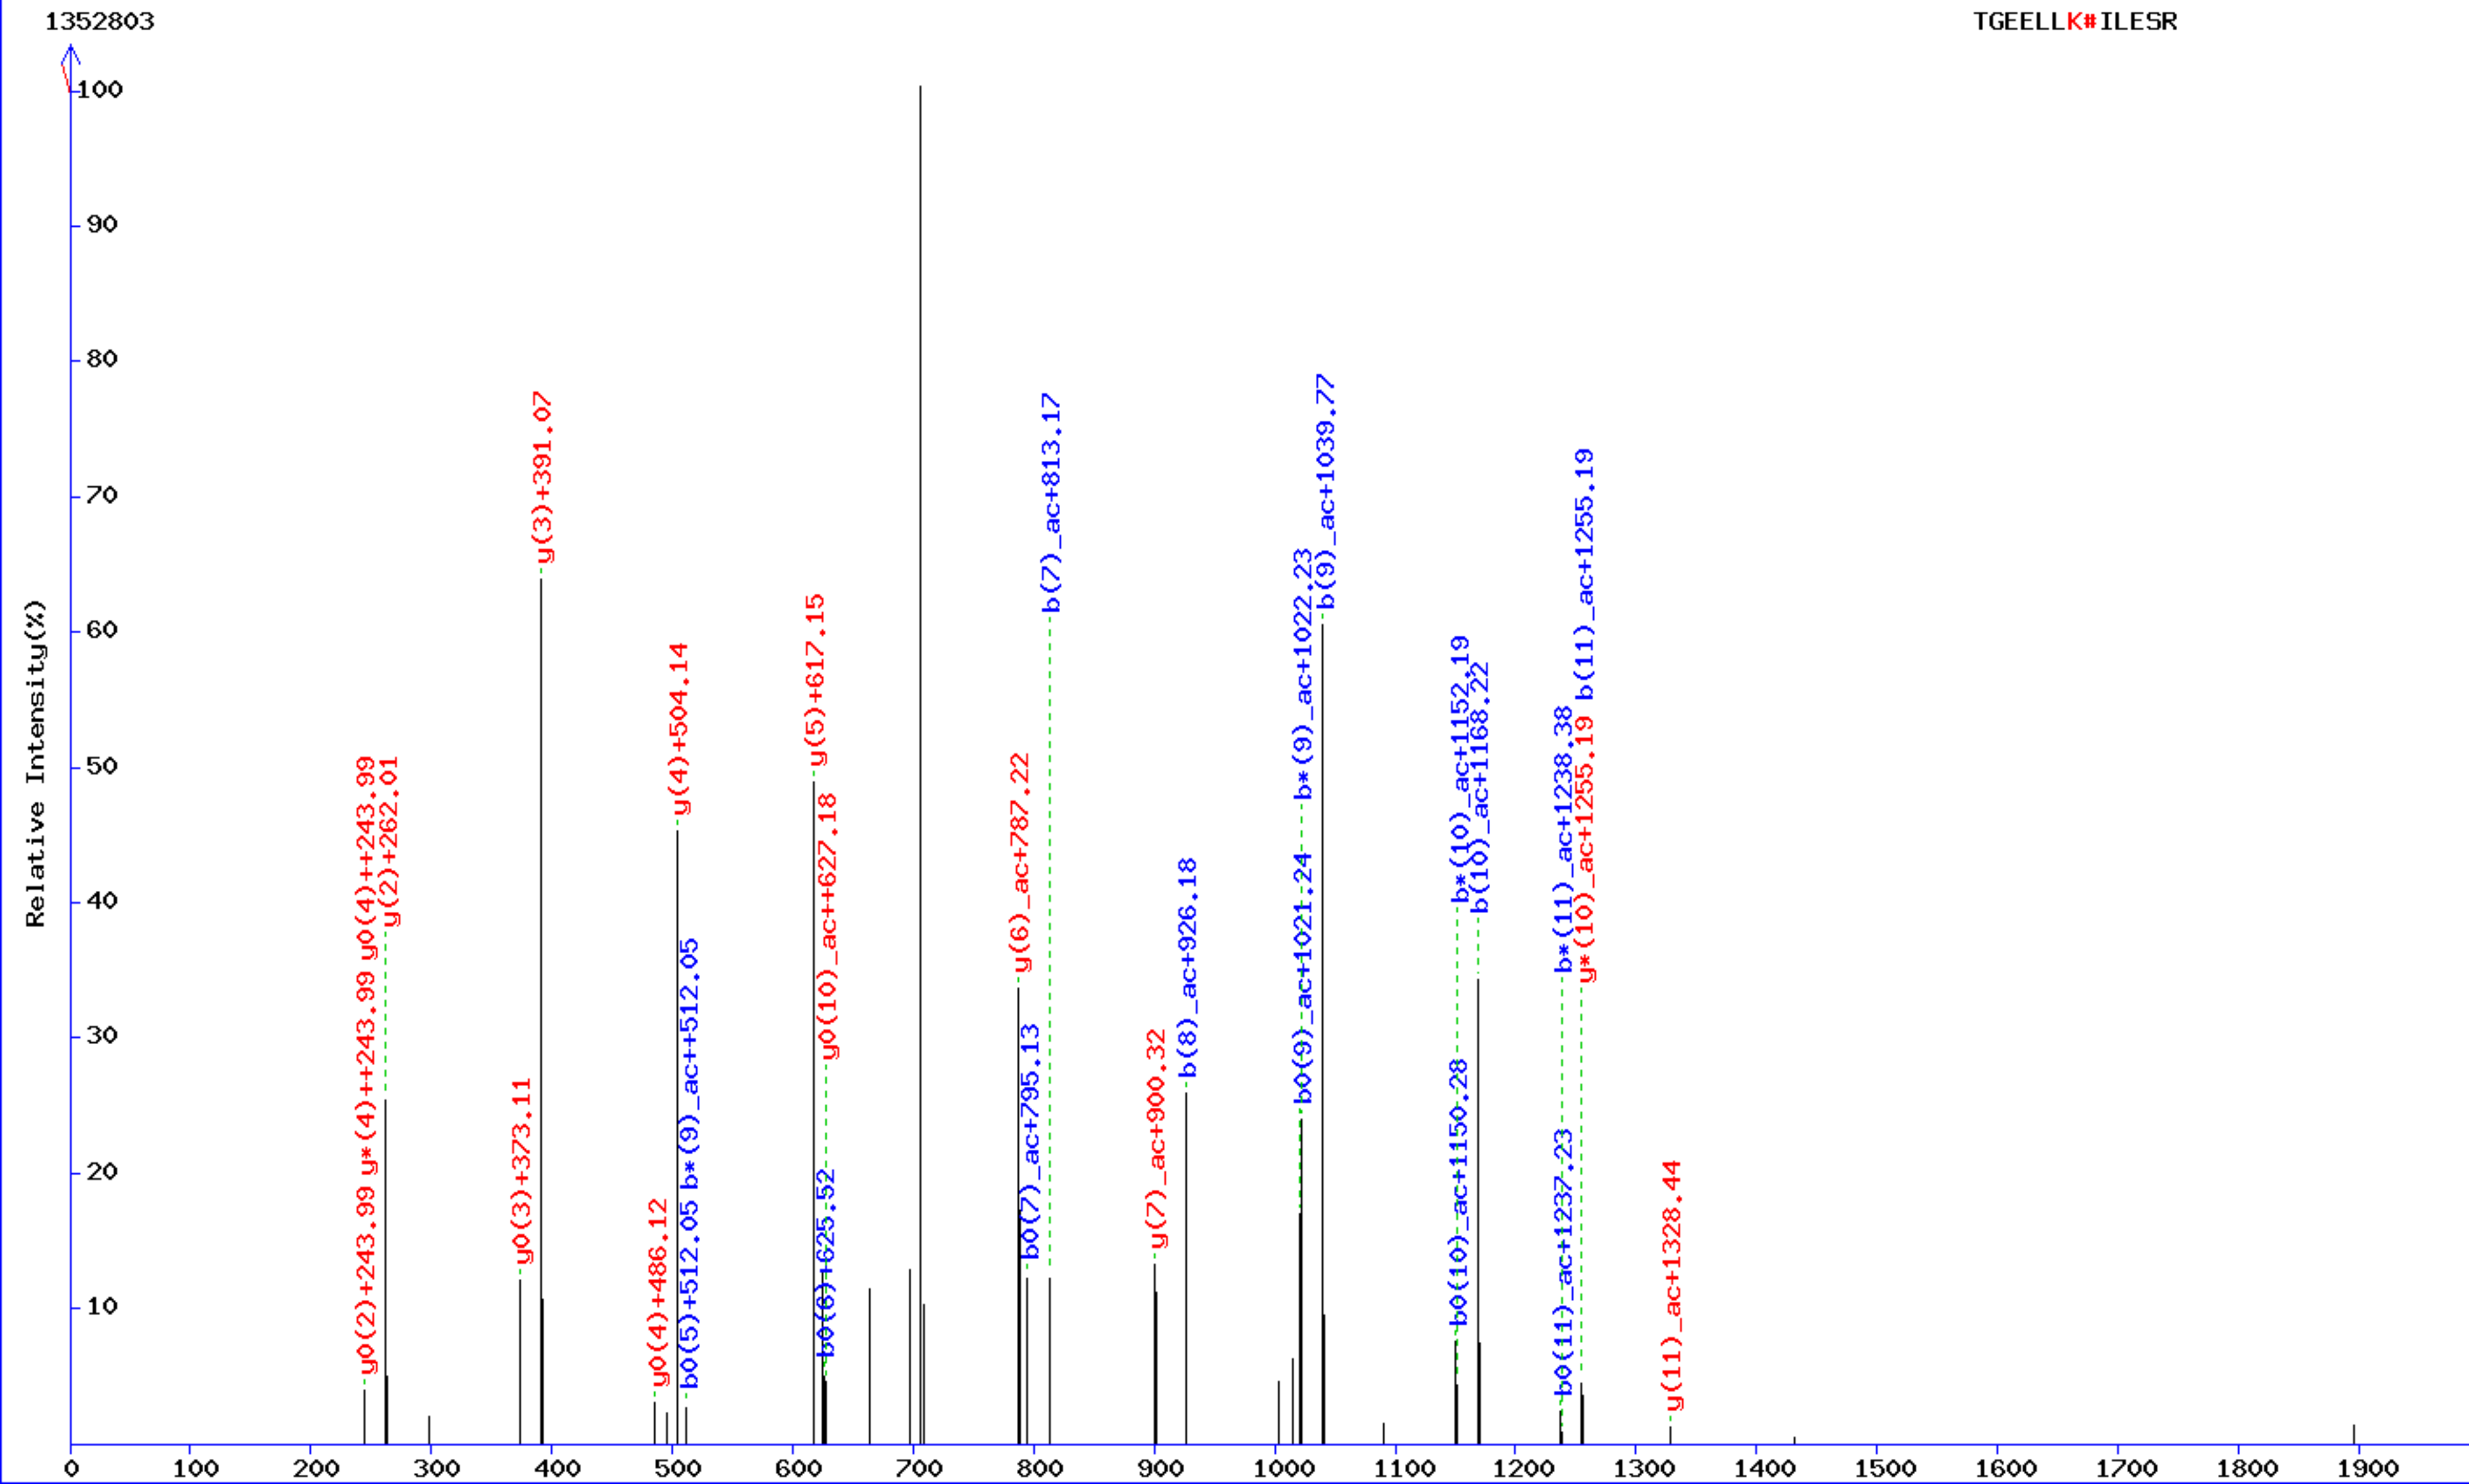

# gi|148660205 MRA\_0445 molecular chaperone GroEL

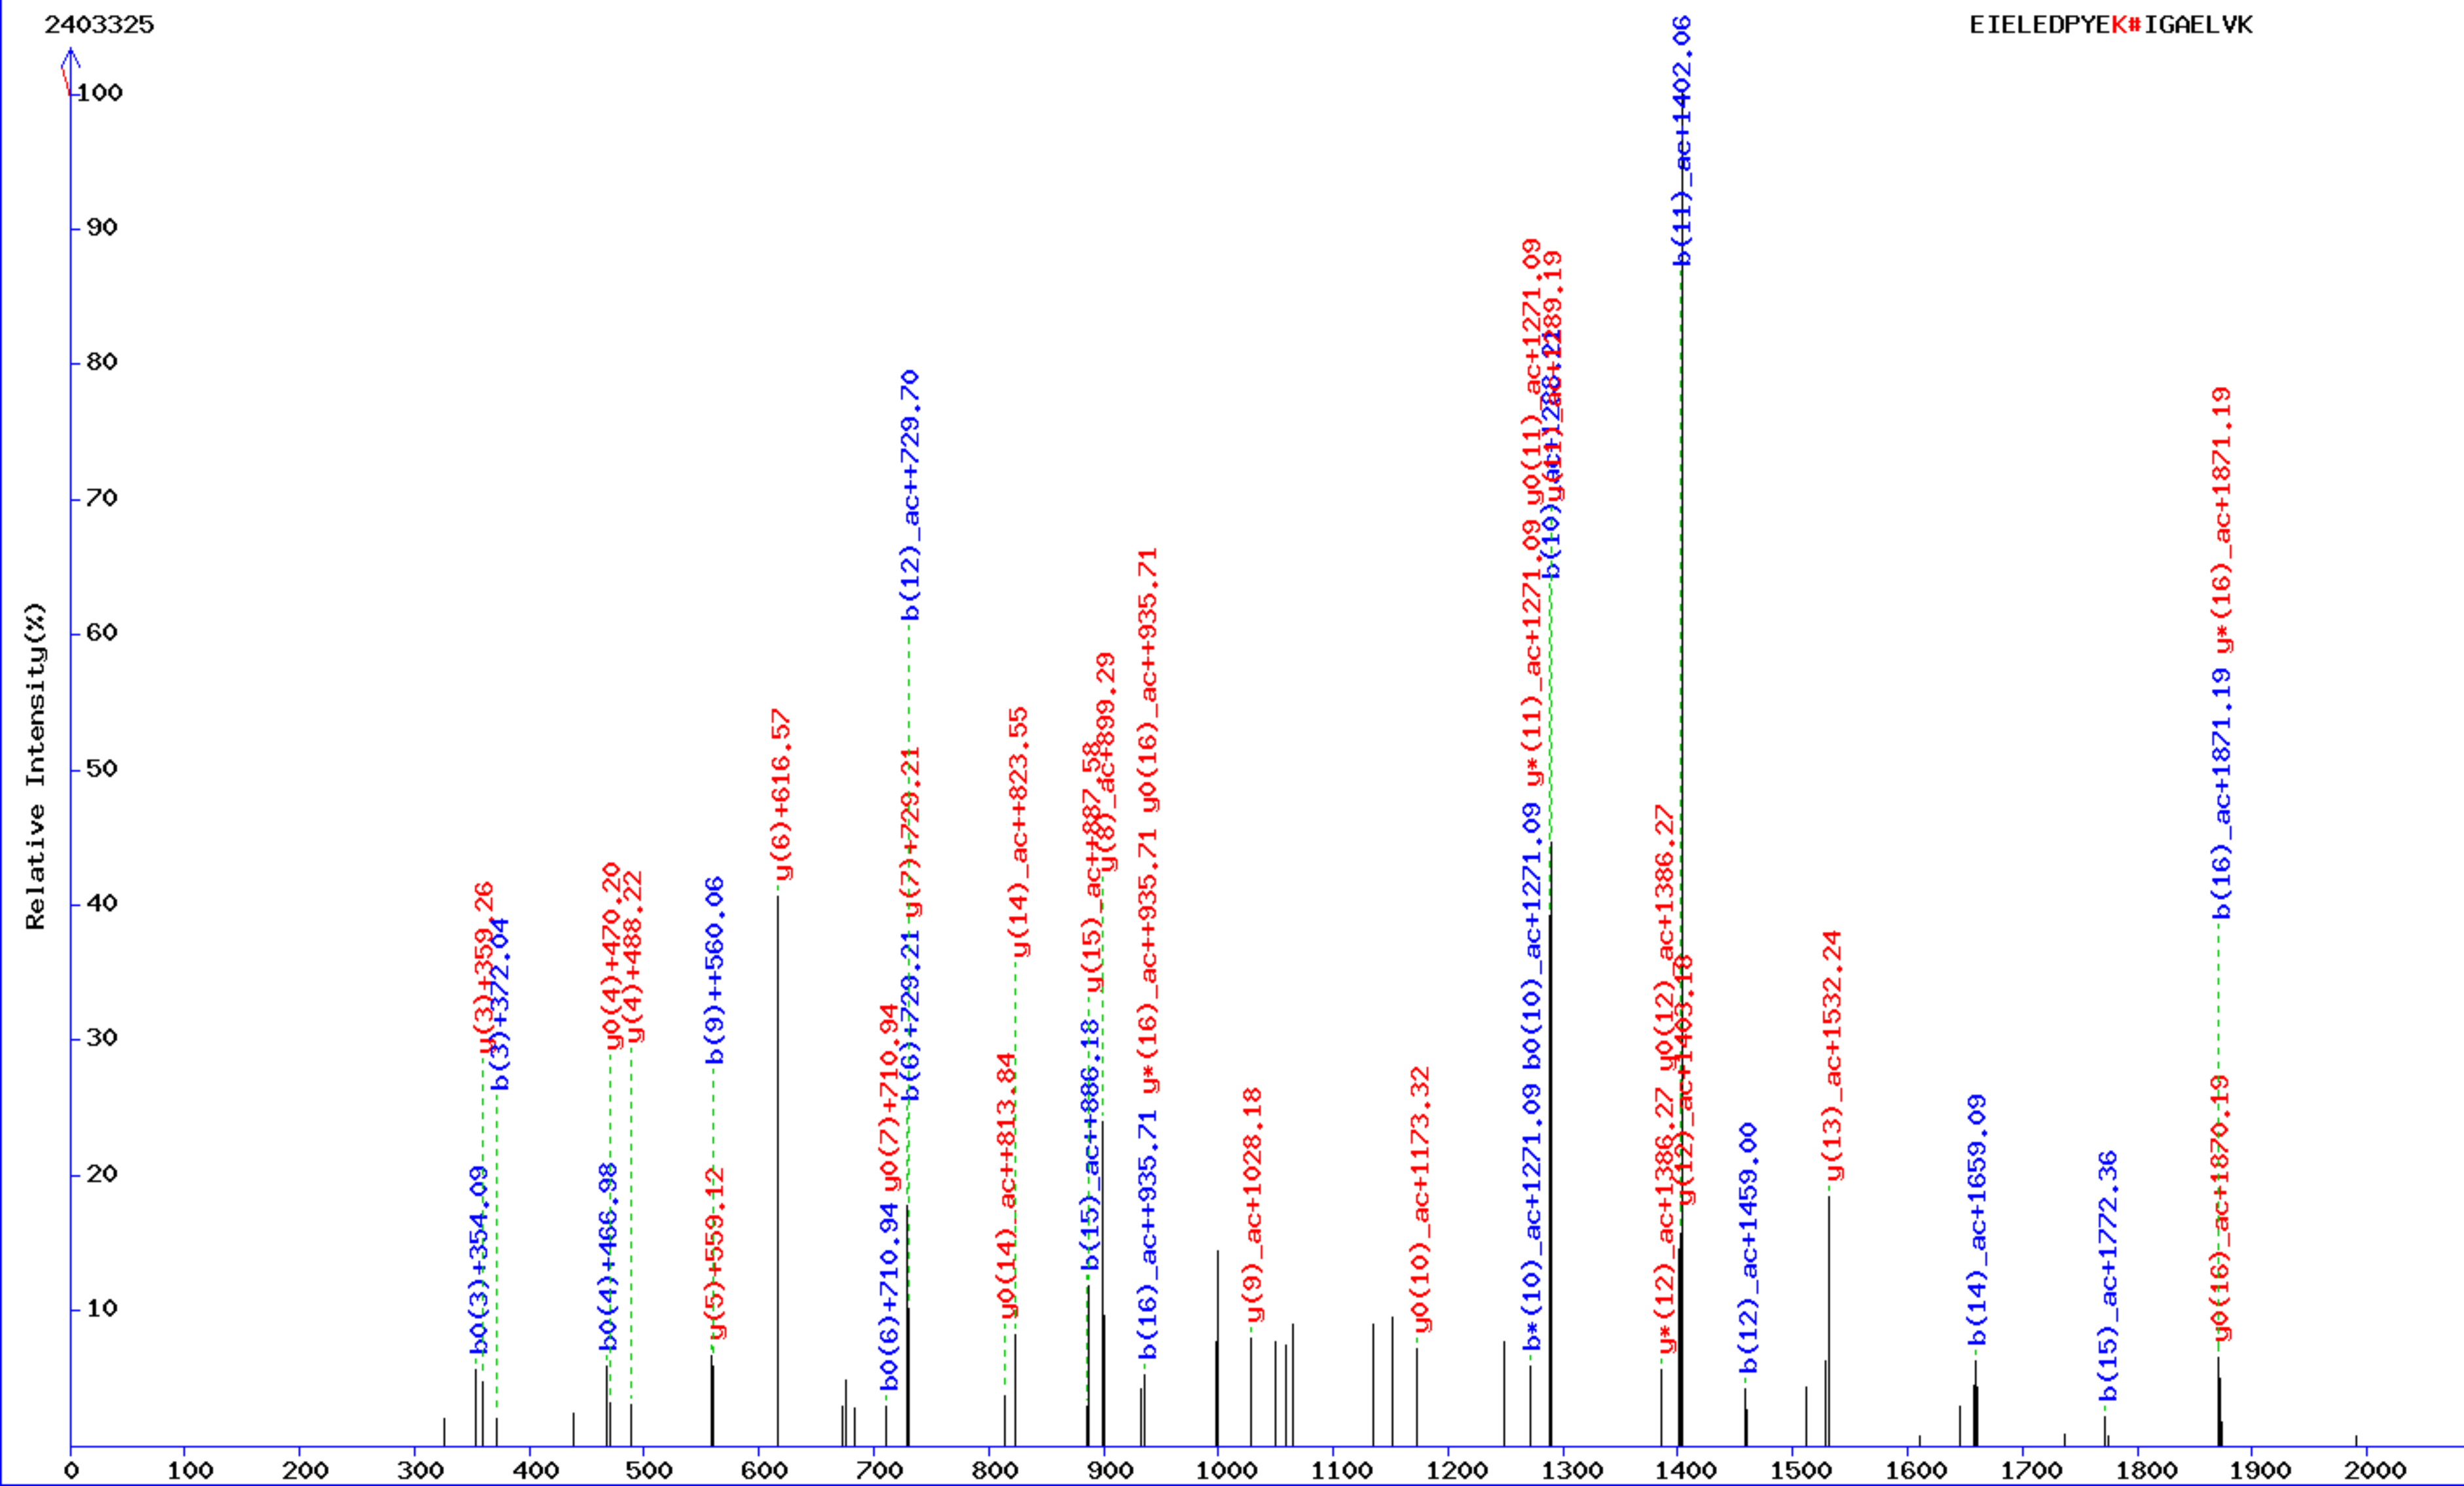

EIELEDPYEK#IGAELVK



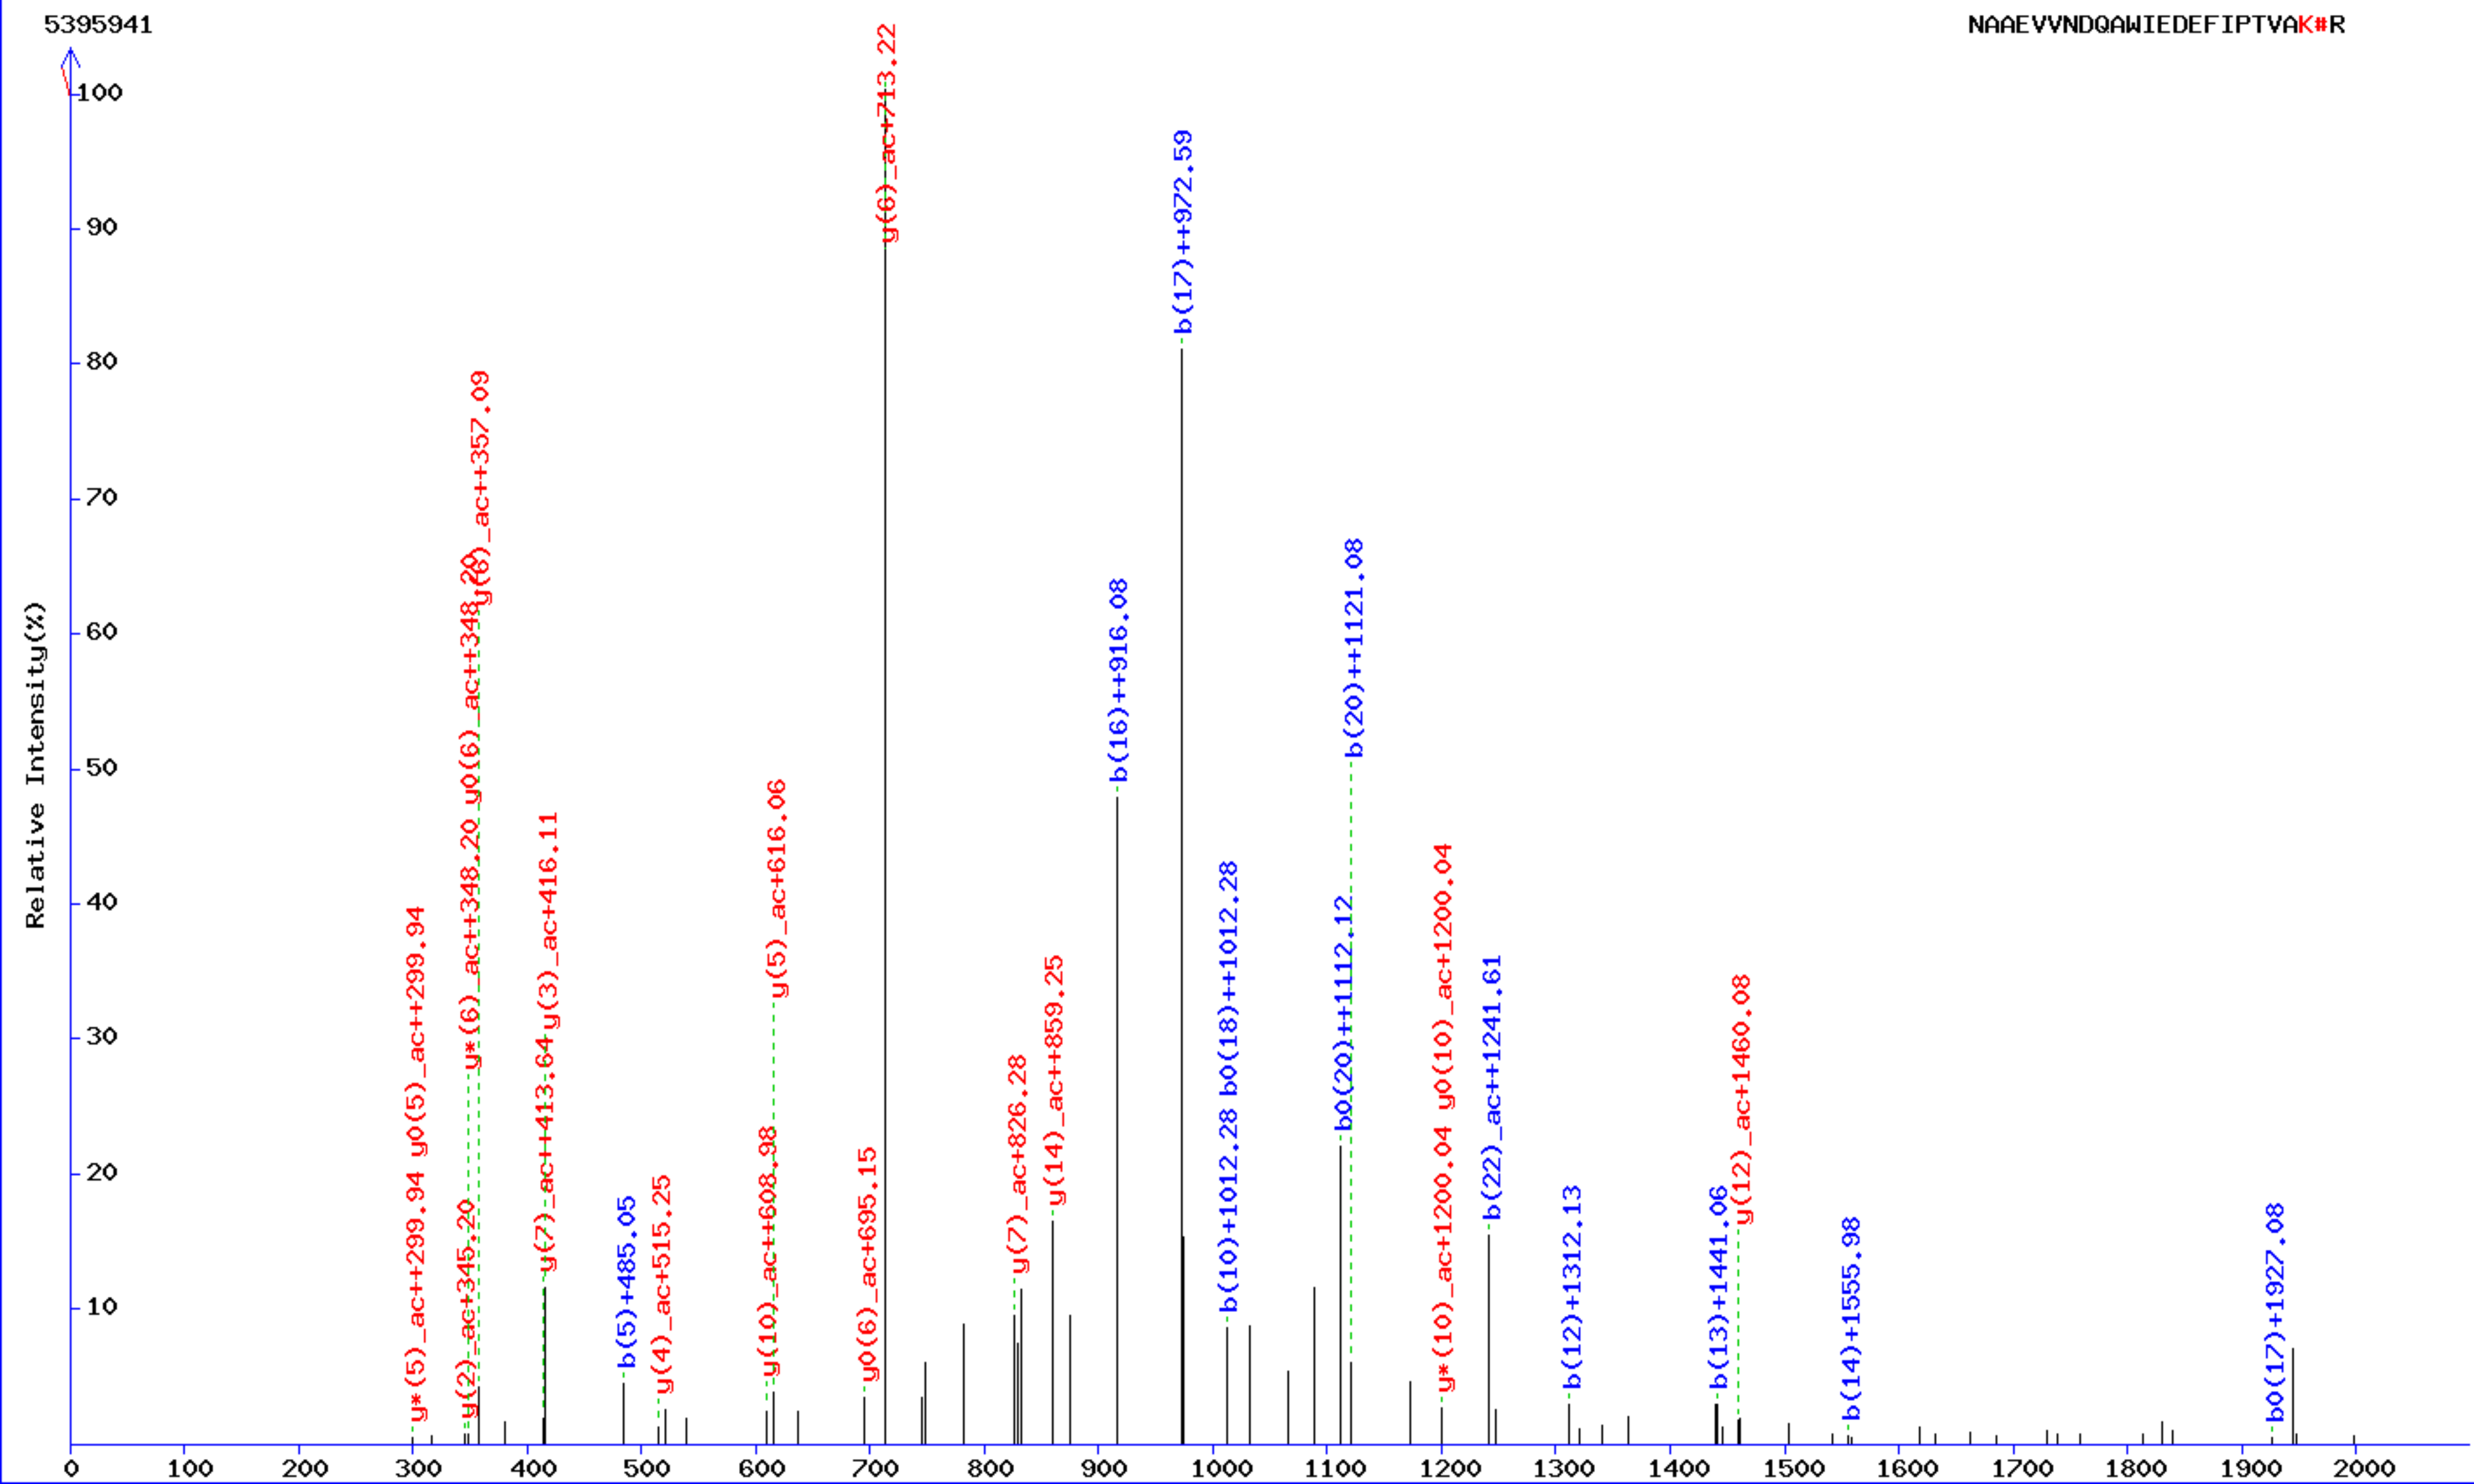

# gi|148661633 MRA\_1839 hypothetical protein

ADFLSELDAPAQAGTESAVSGVEGLPPGSALLVV**K#R**

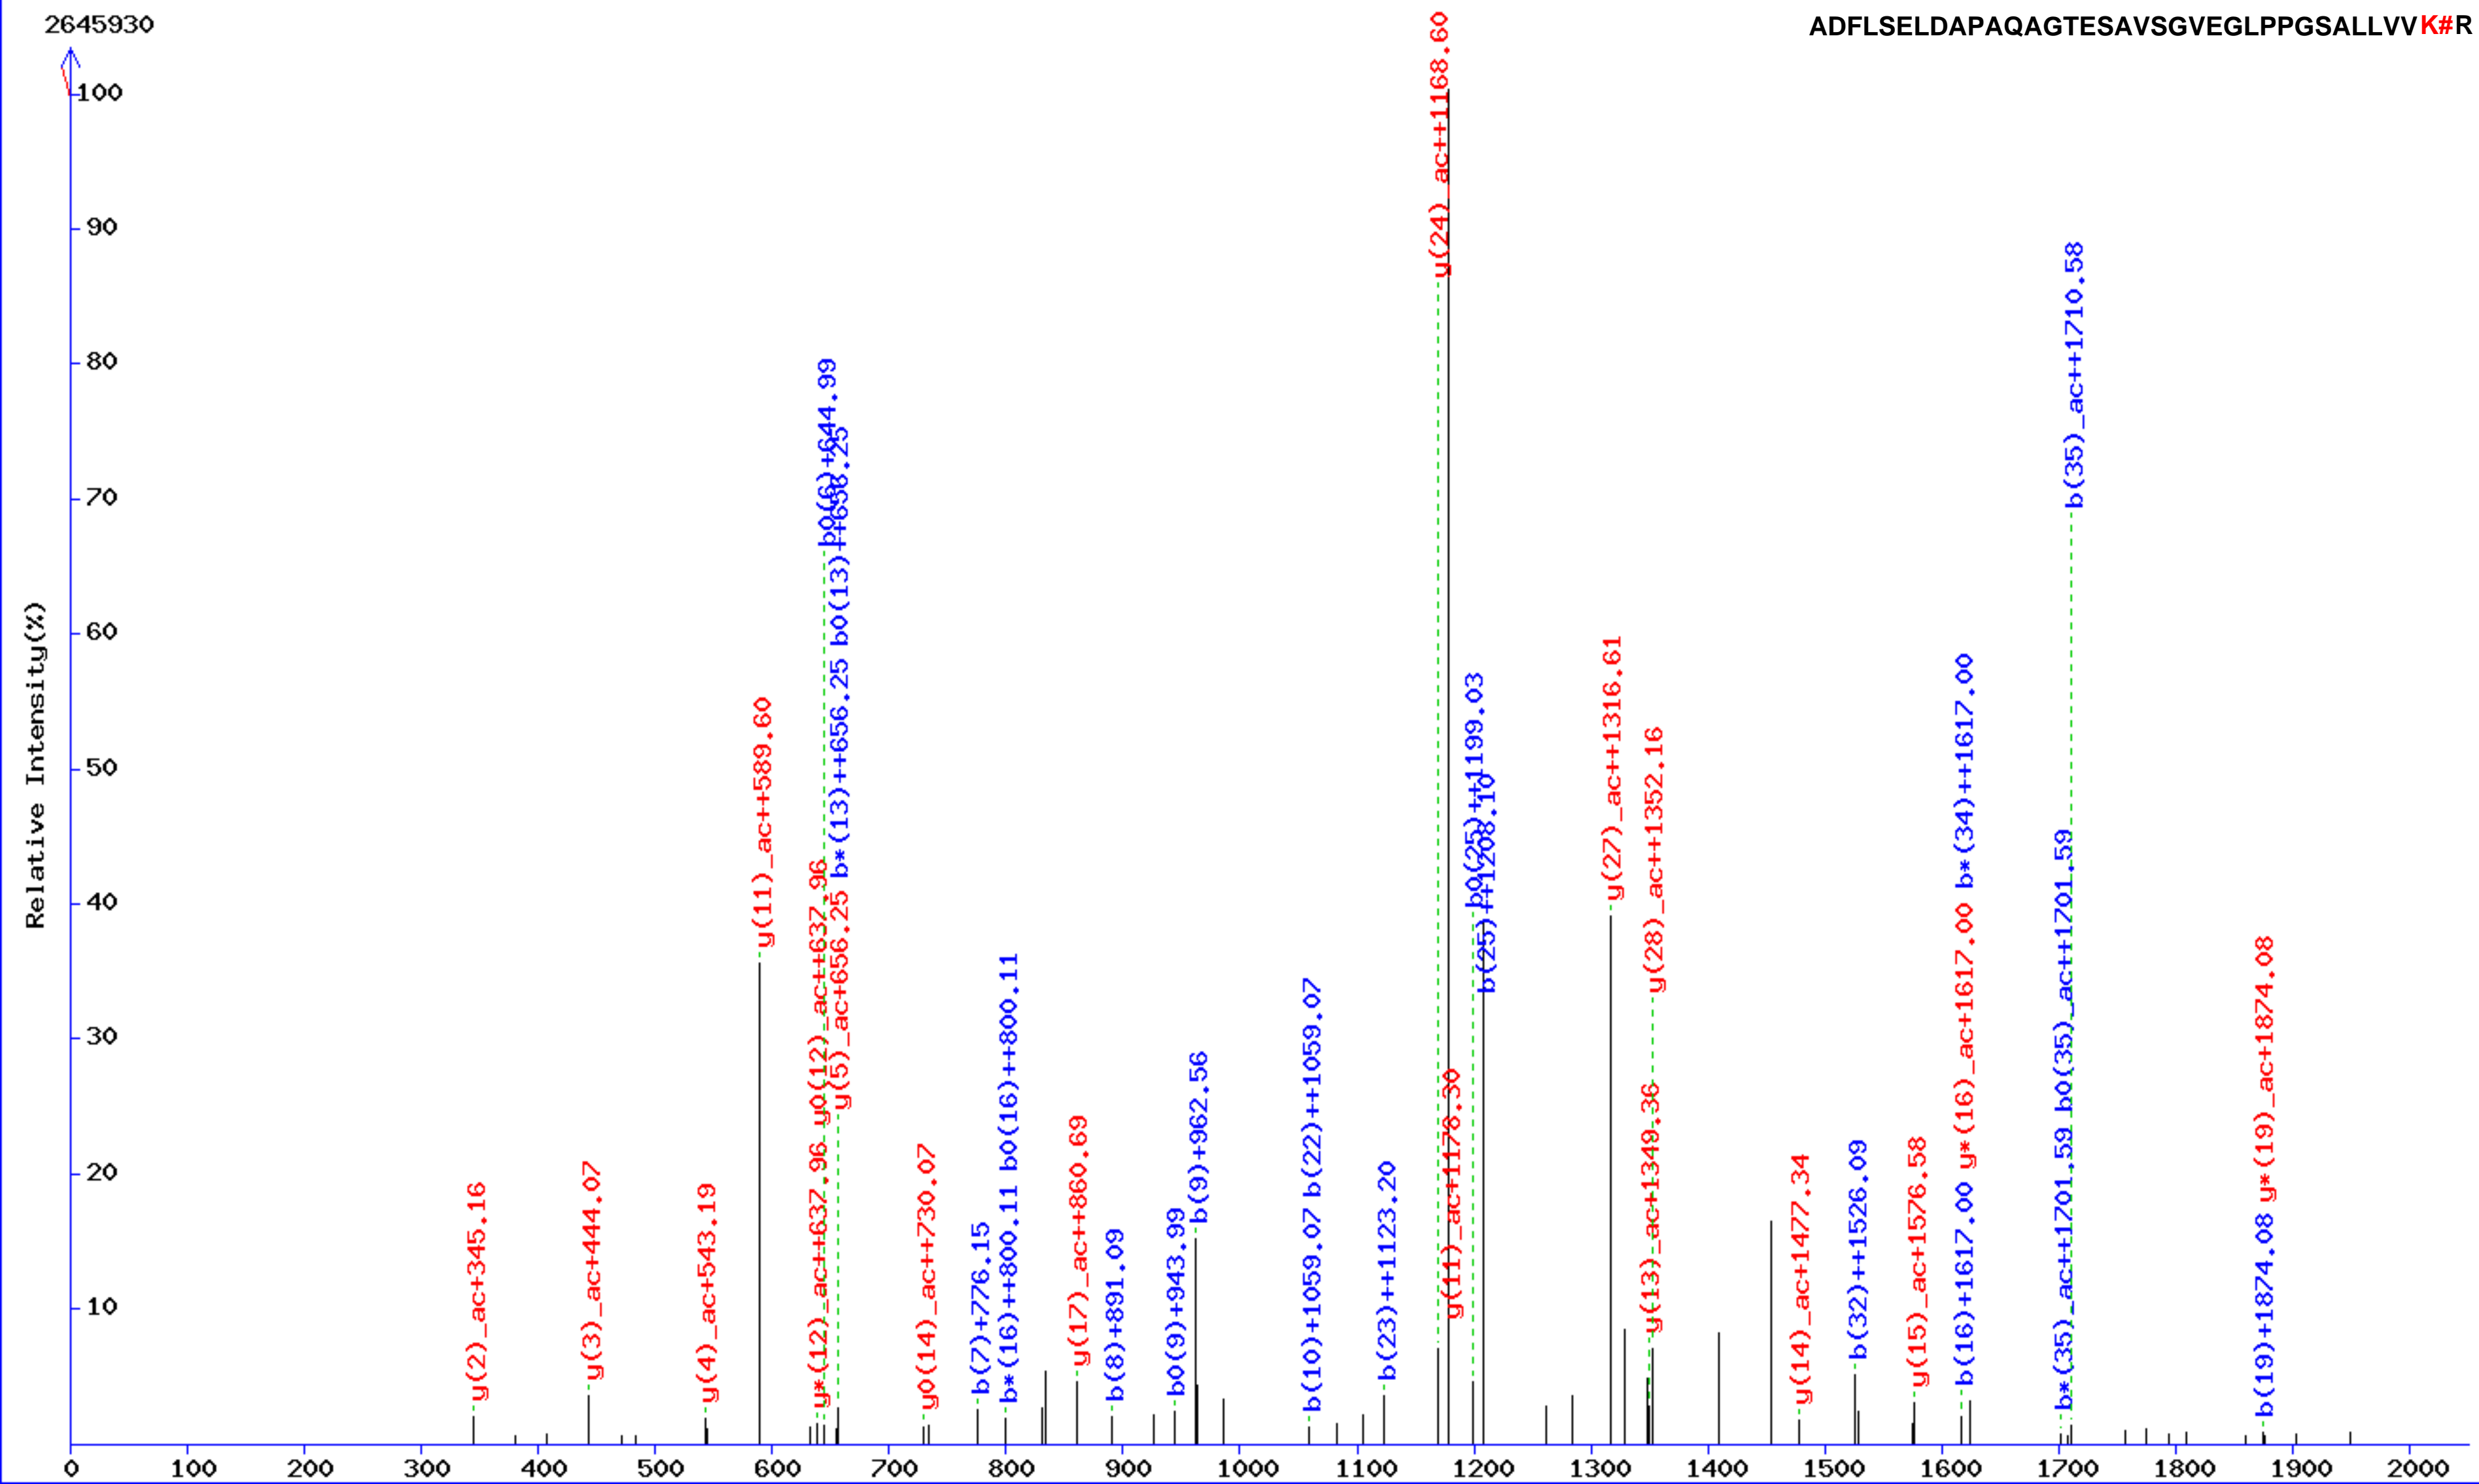

gi|148662065 MRA\_2264 acyl carrier protein

TVGDVWAYIQK#LEENPEAAGALR

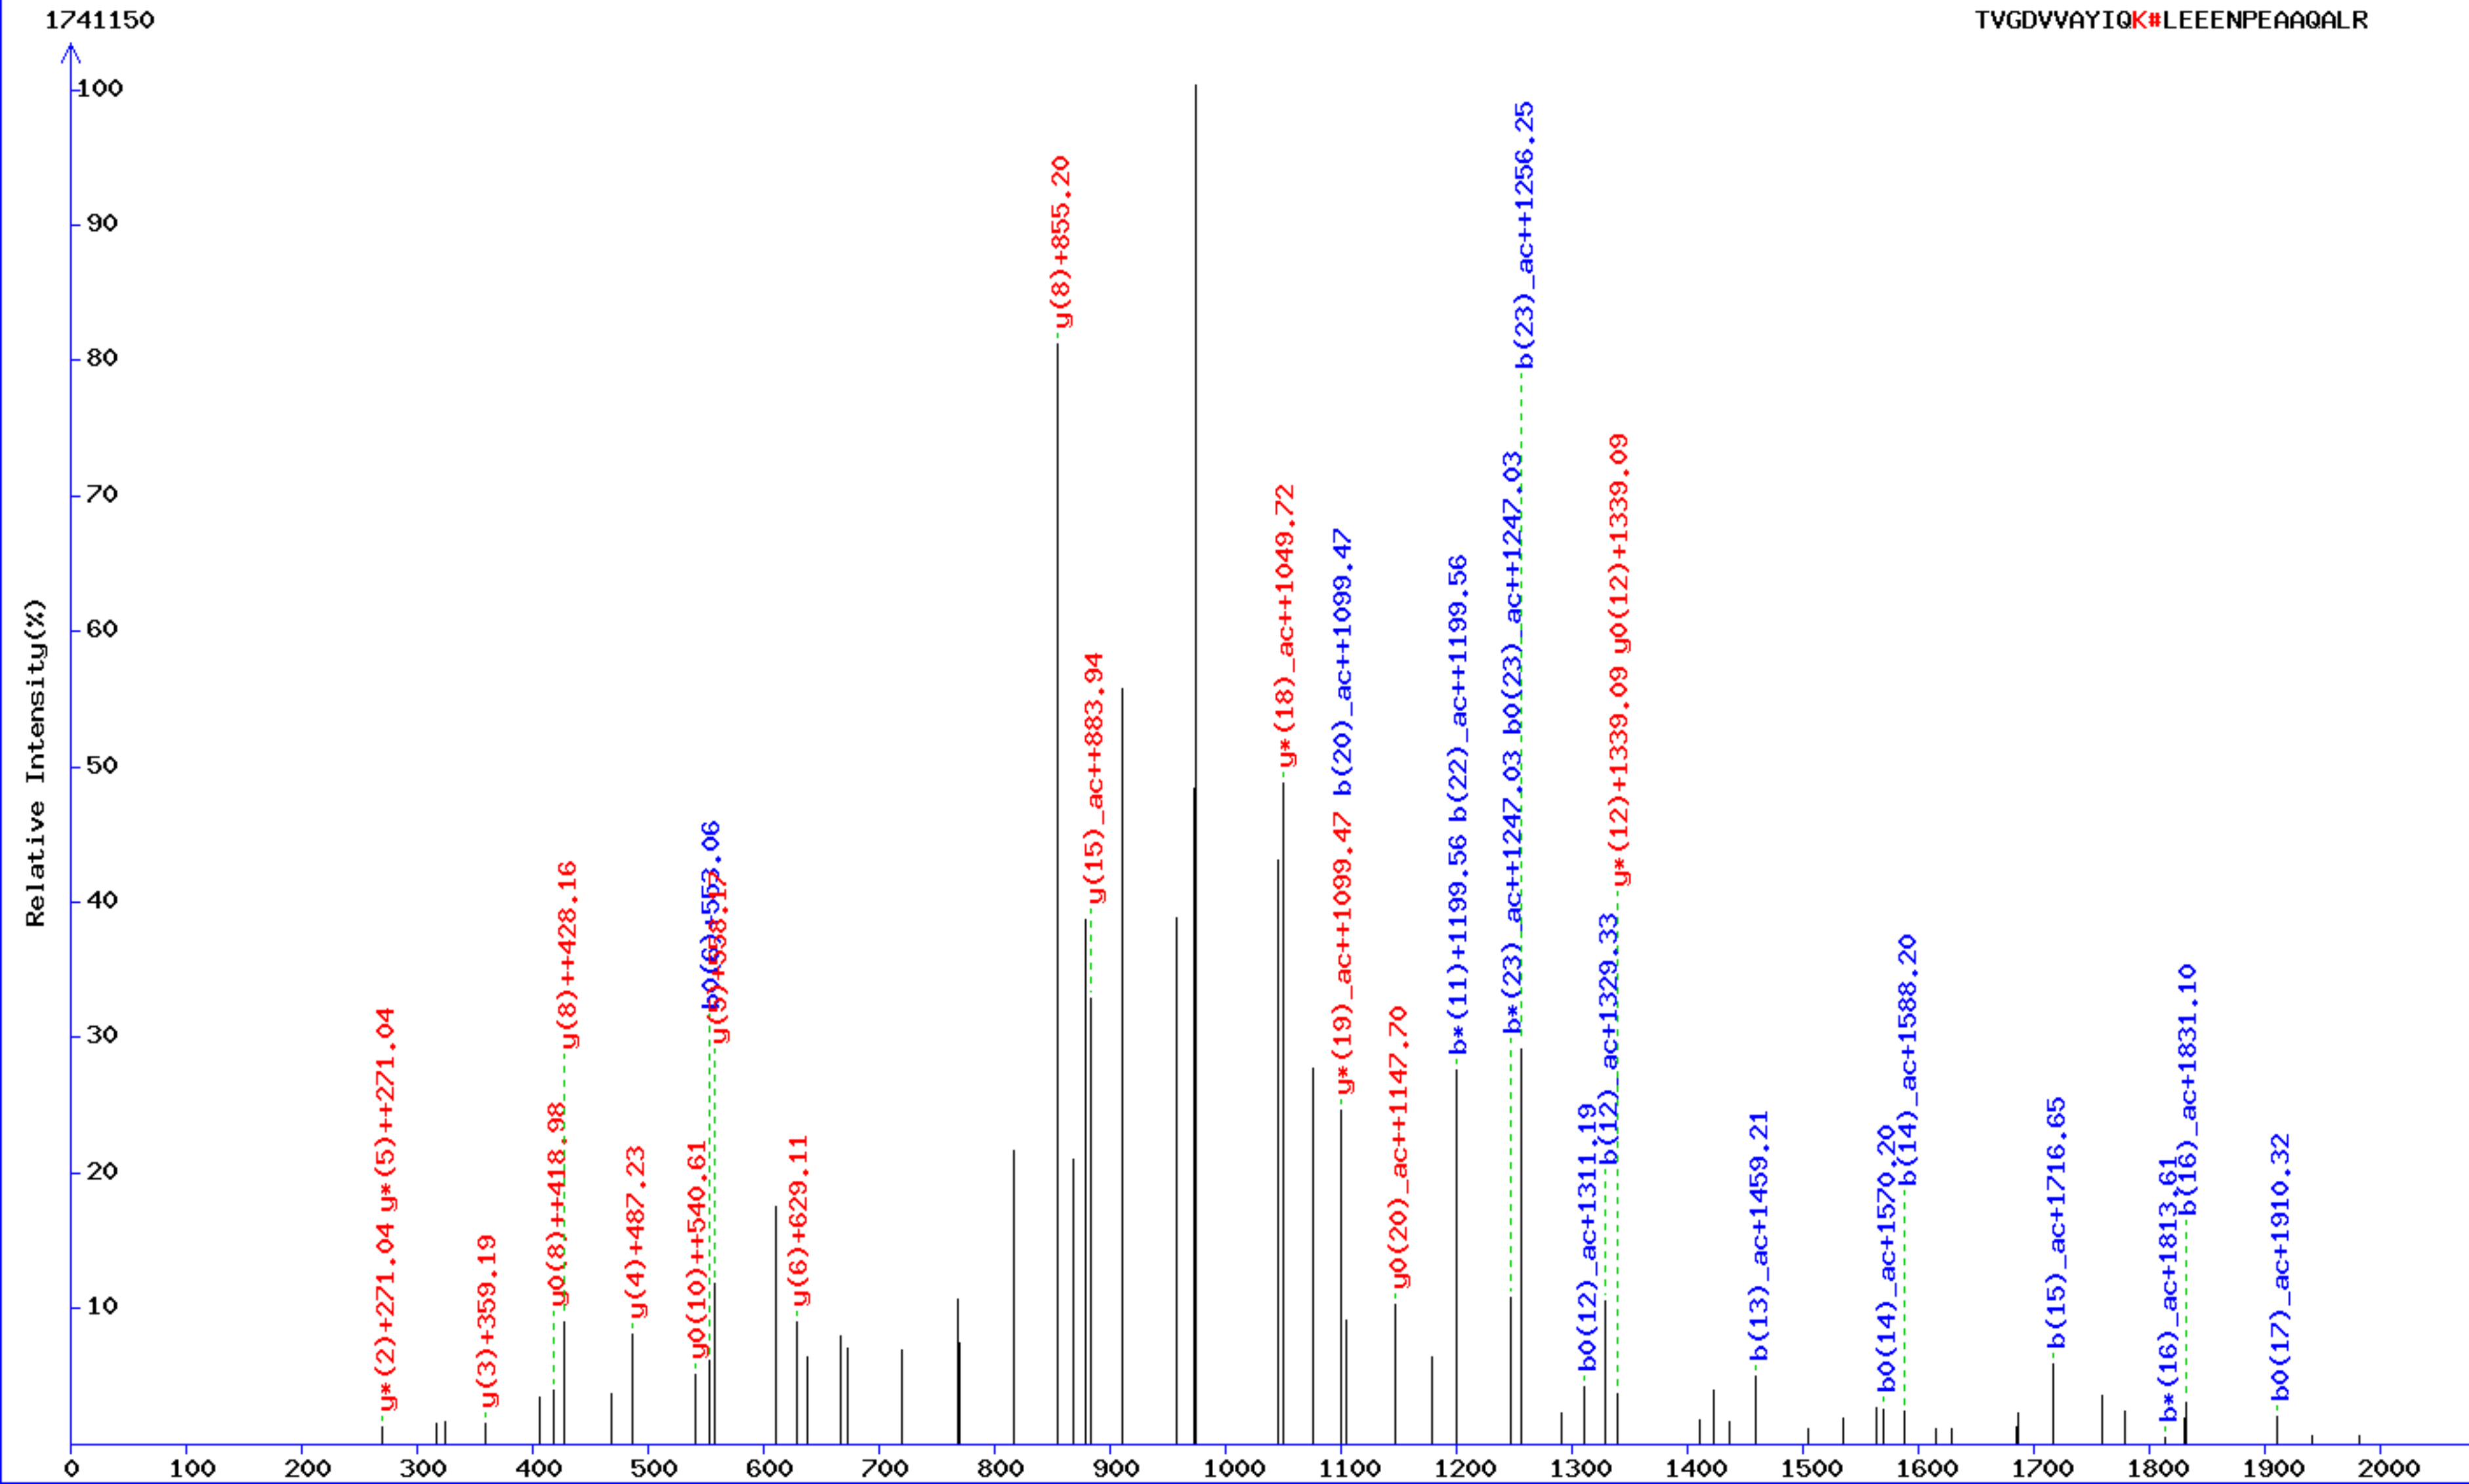

gi|148661096 MRA\_1316 ATP synthase F0F1 subunit alpha

DSQK#LTEEADK

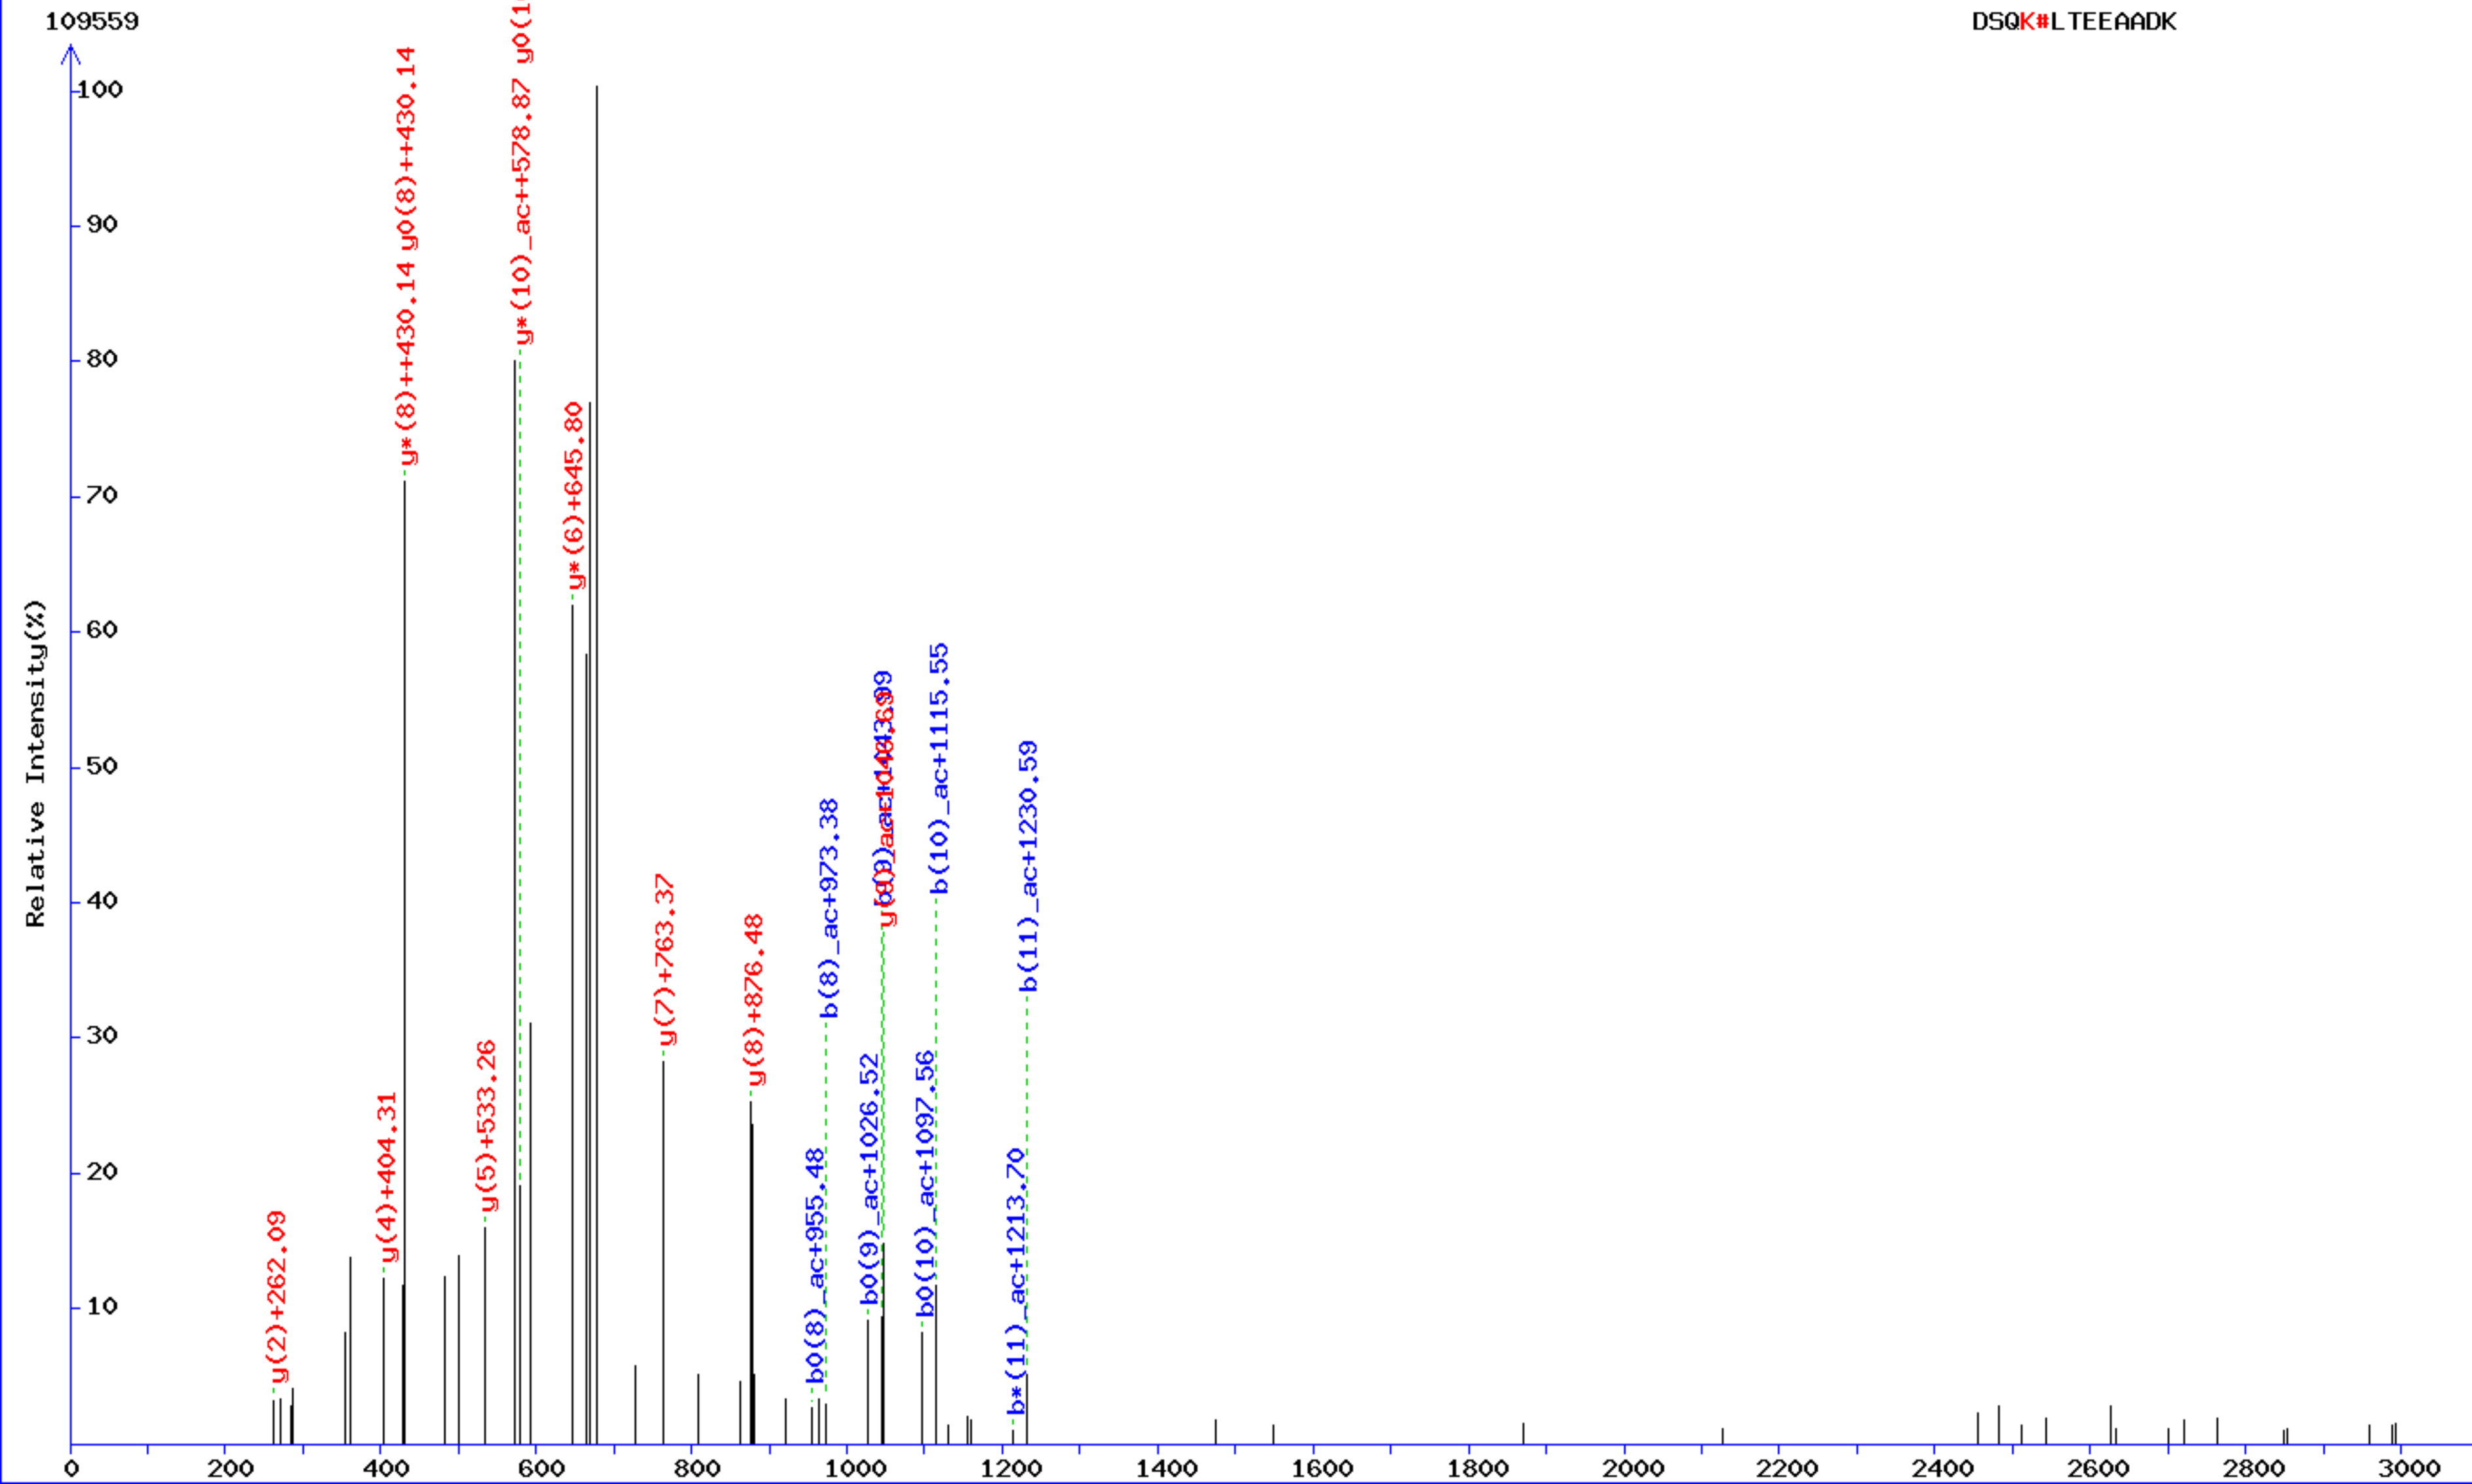

# gi|148660320 MRA\_0558 acyl-CoA synthetase

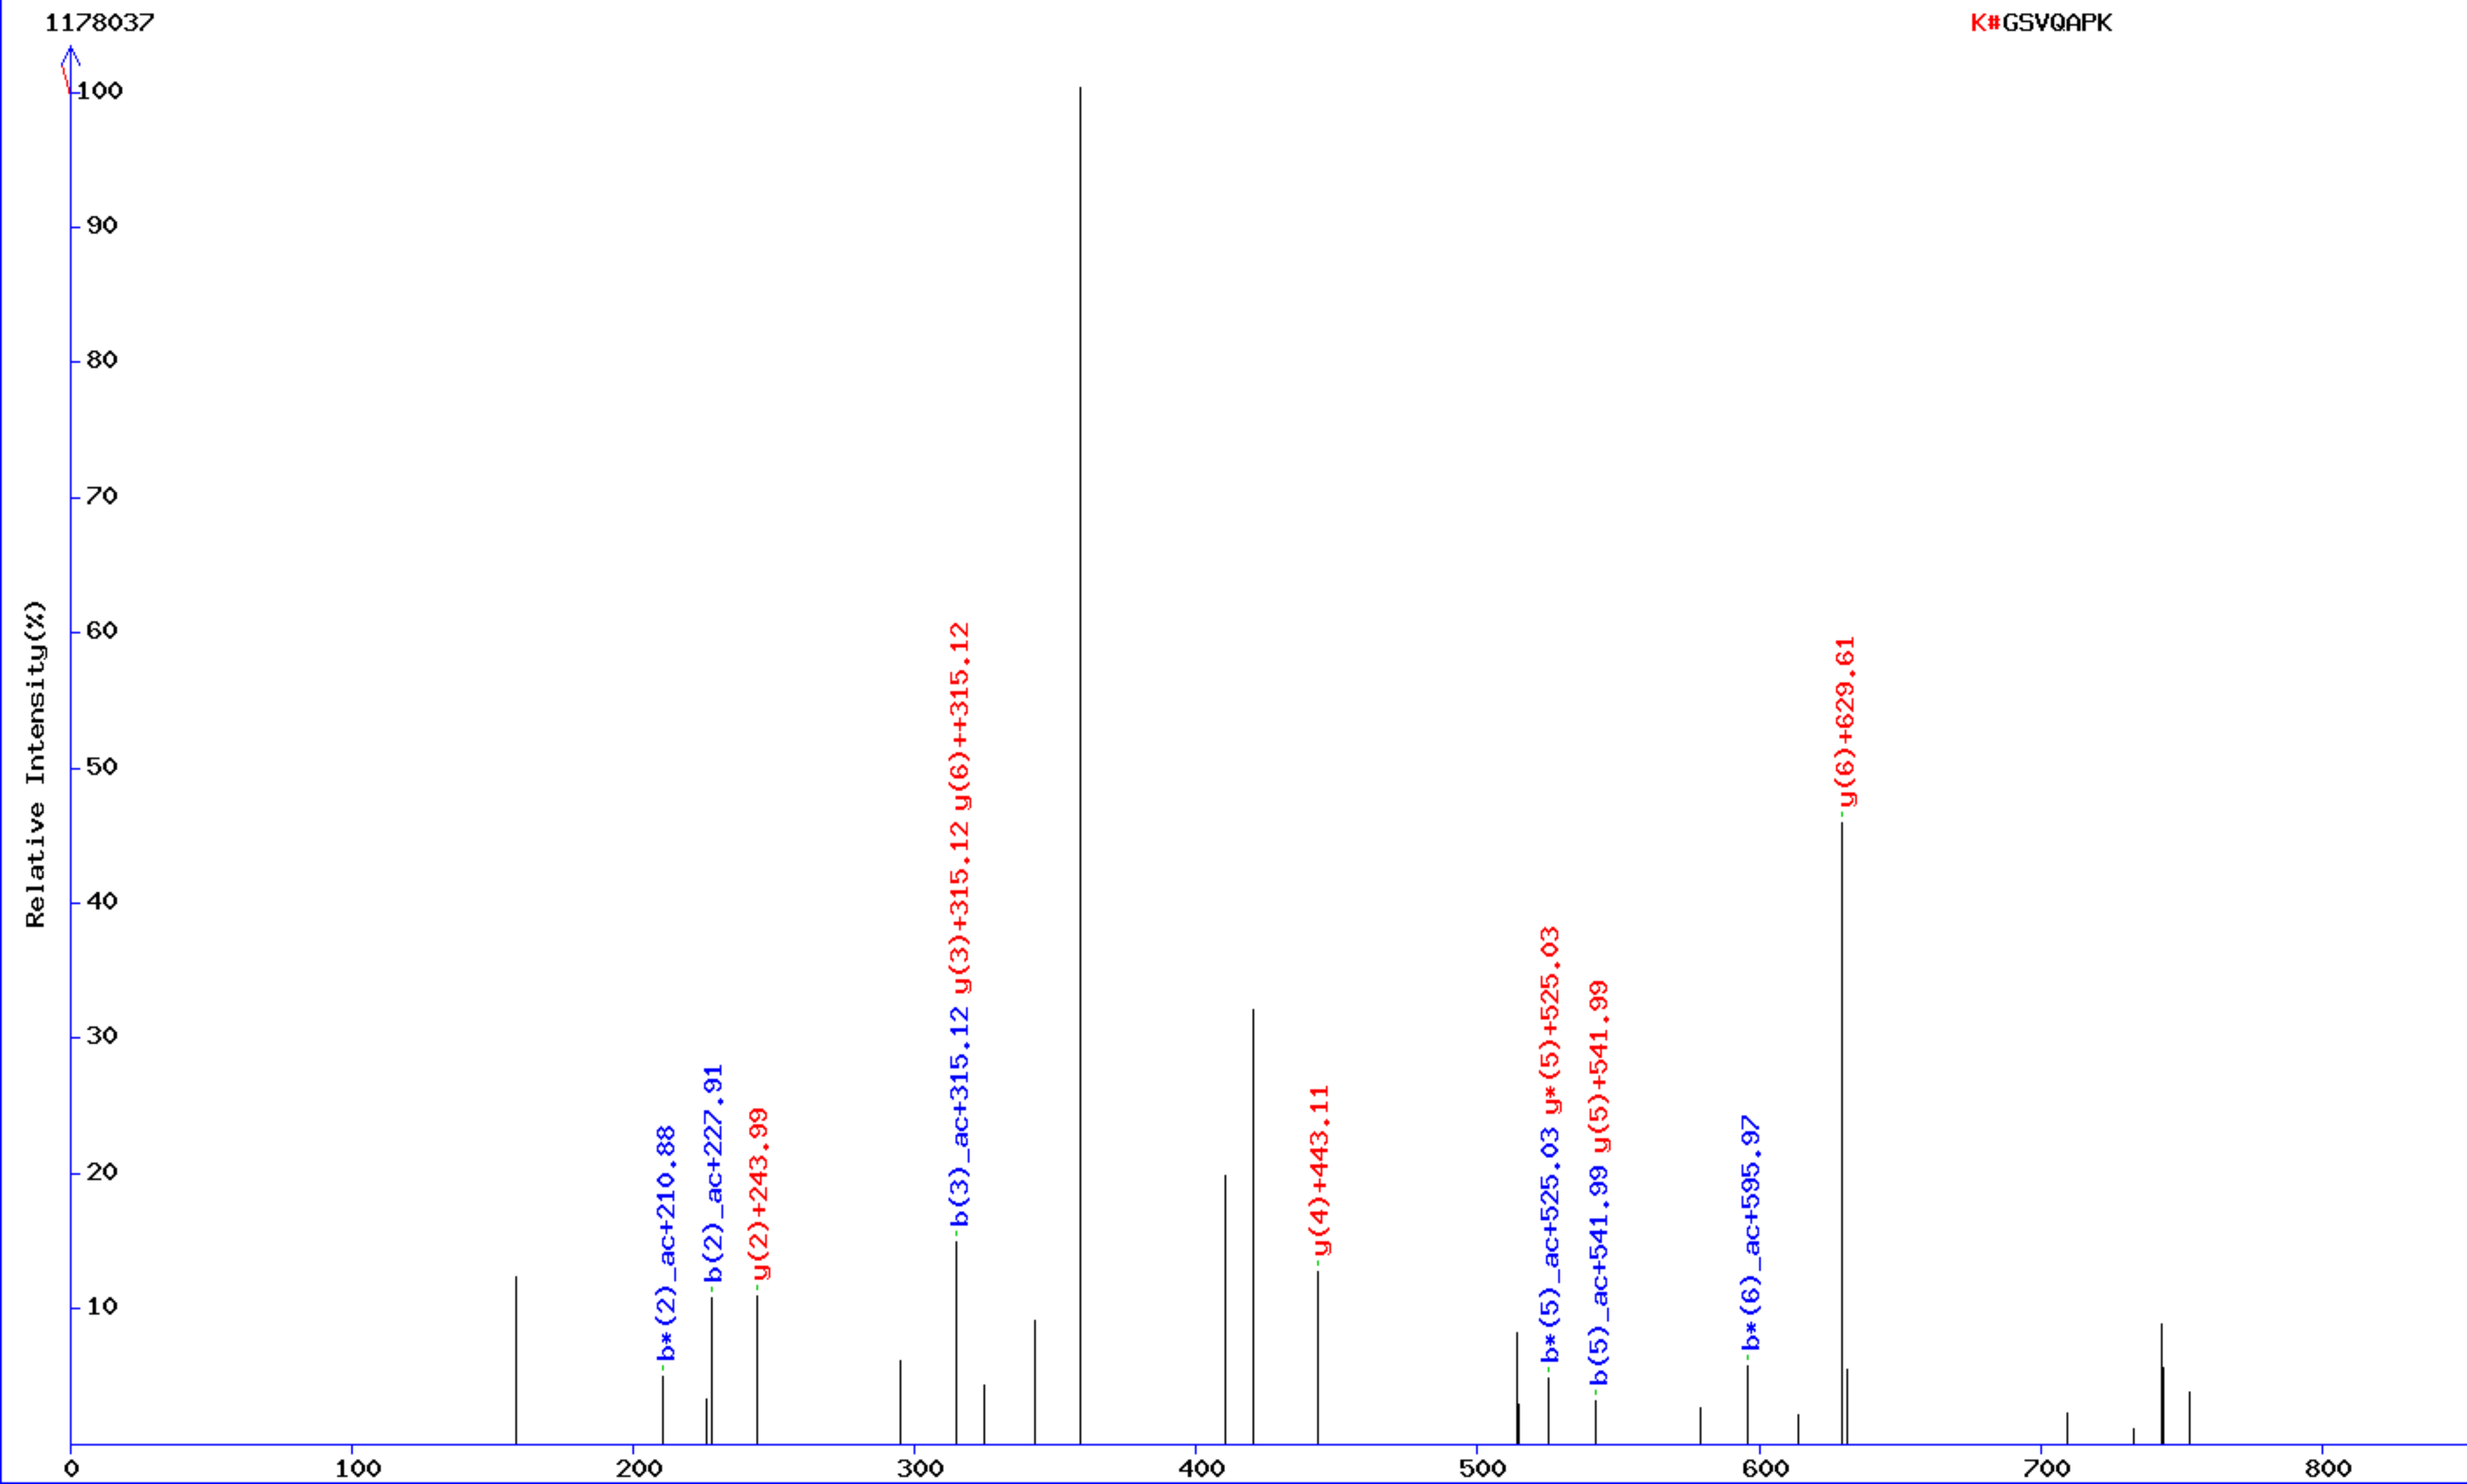

# gi|148663086 MRA\_3264 short chain dehydrogenase

DGANIALIAK#TAEHPK

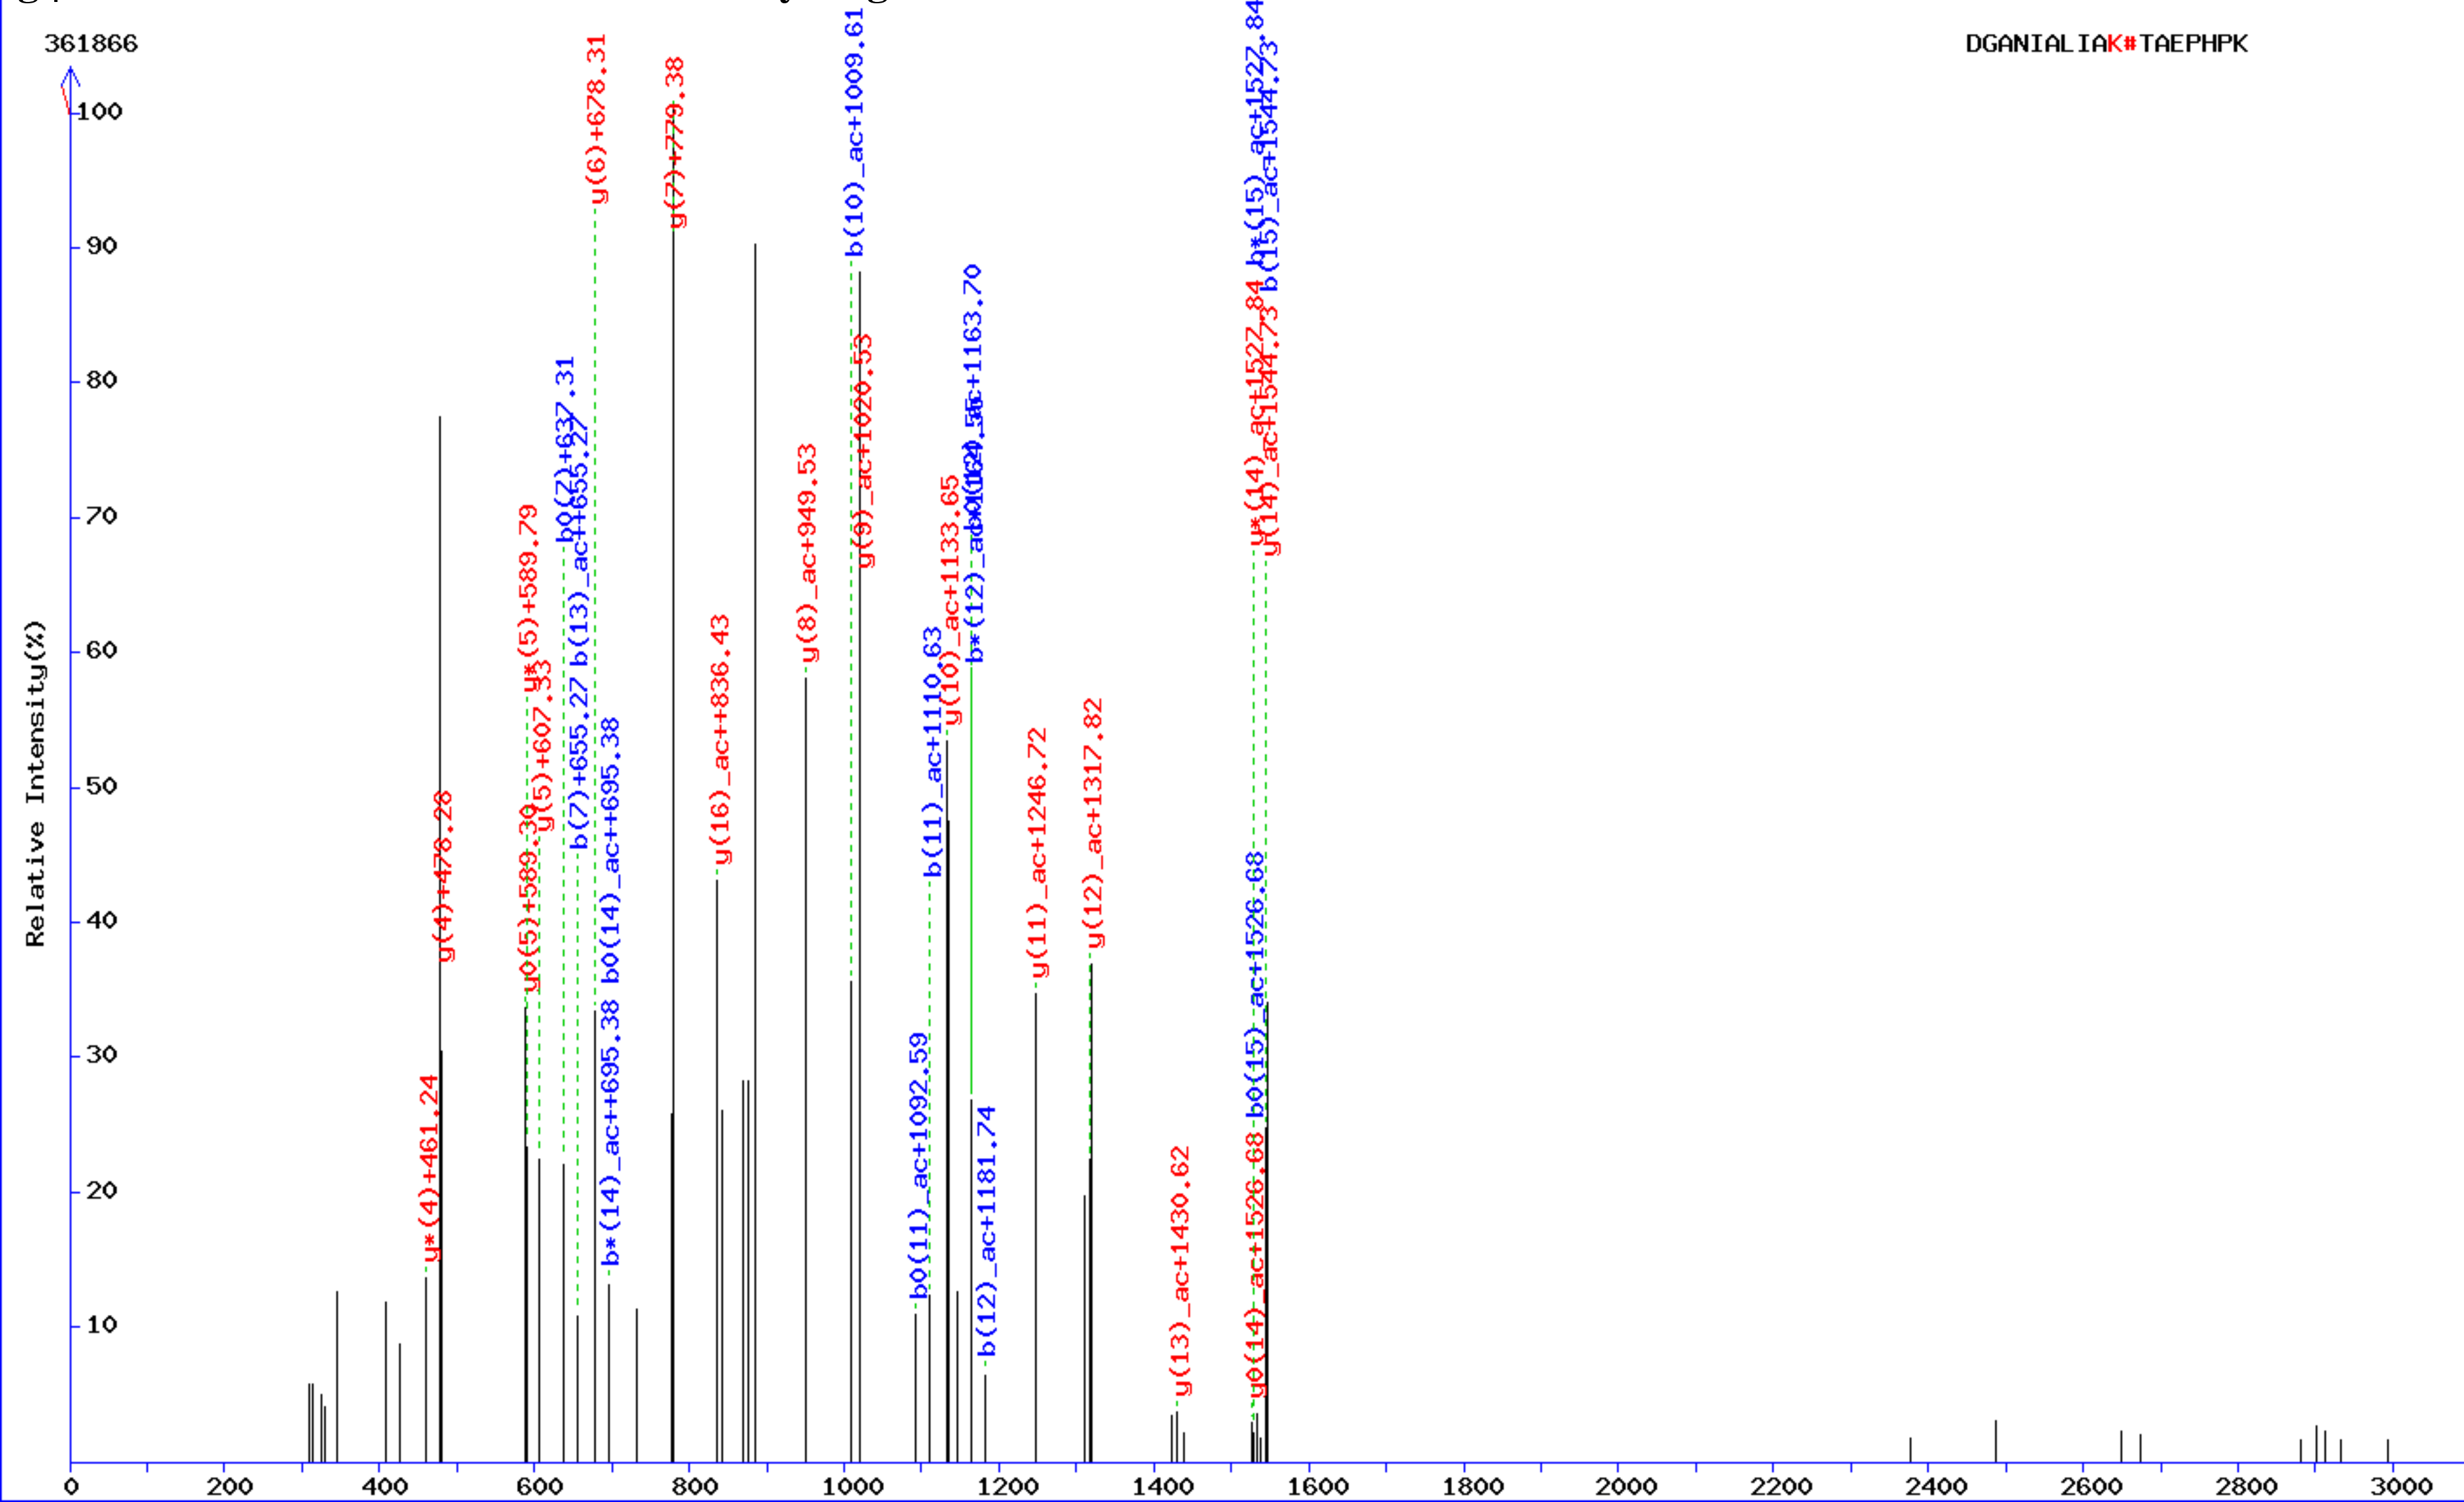

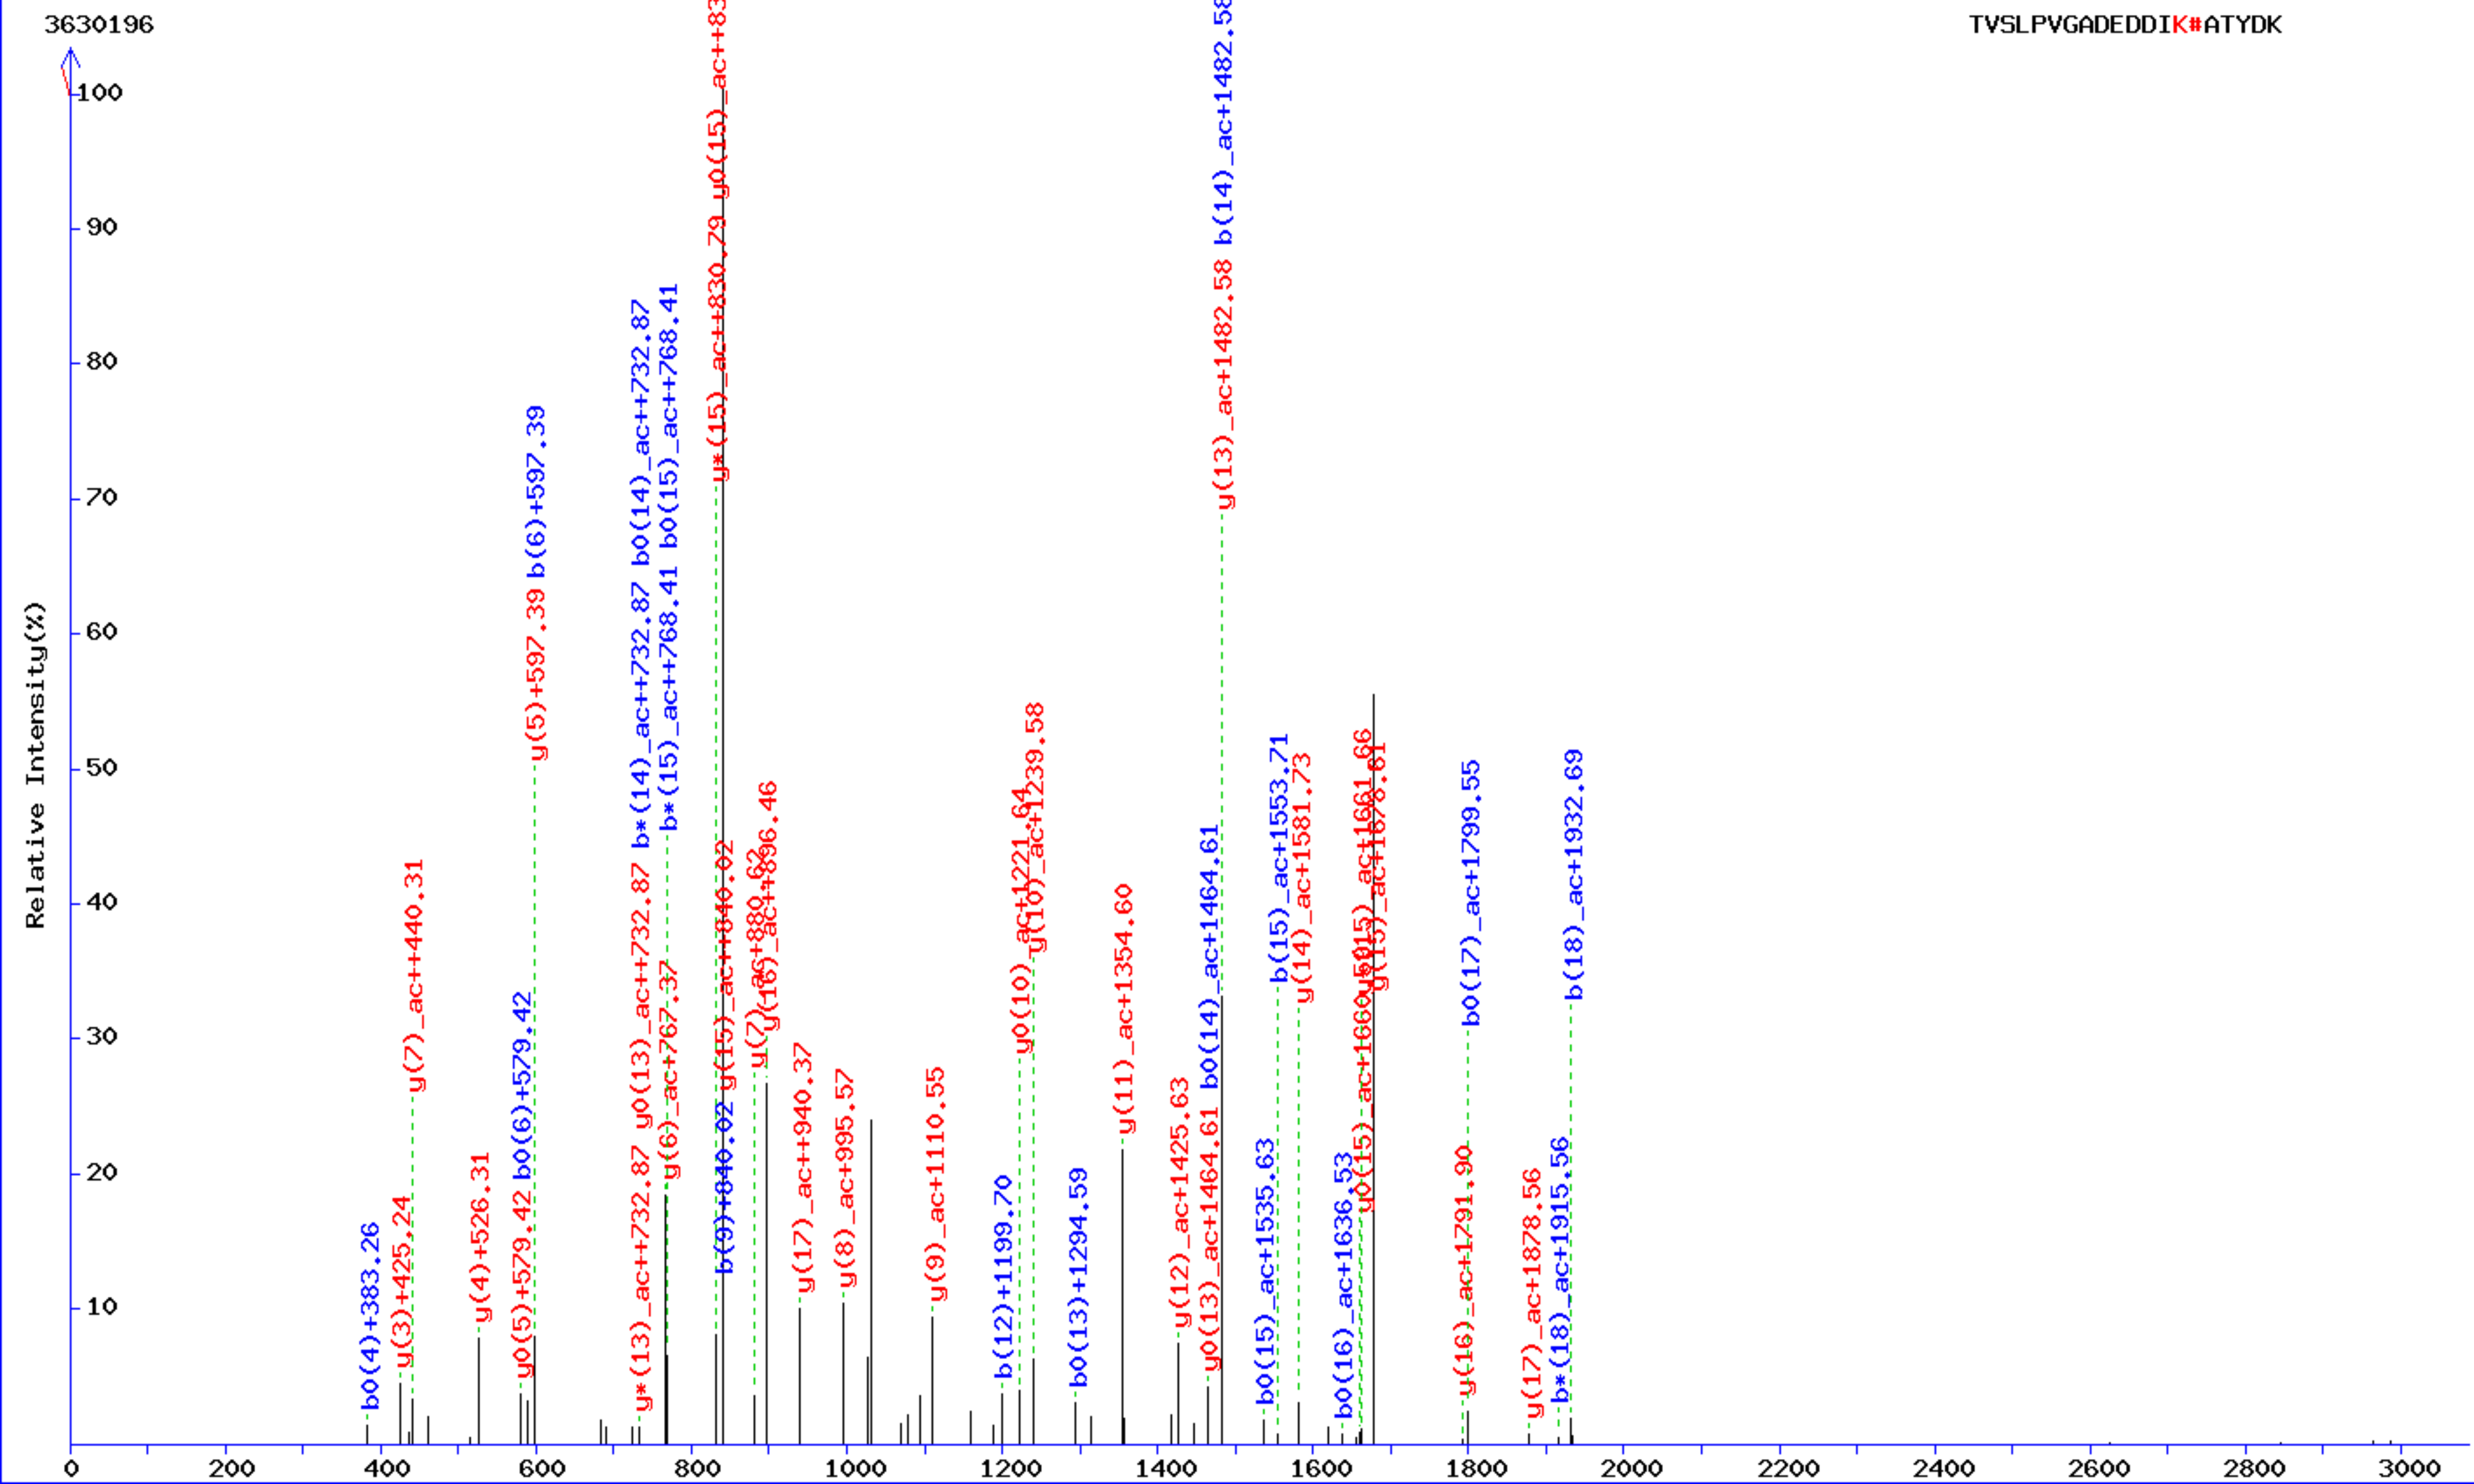

# gi|148660205 MRA\_0445 molecular chaperone GroEL

FDK#GYISGYFVTDPER

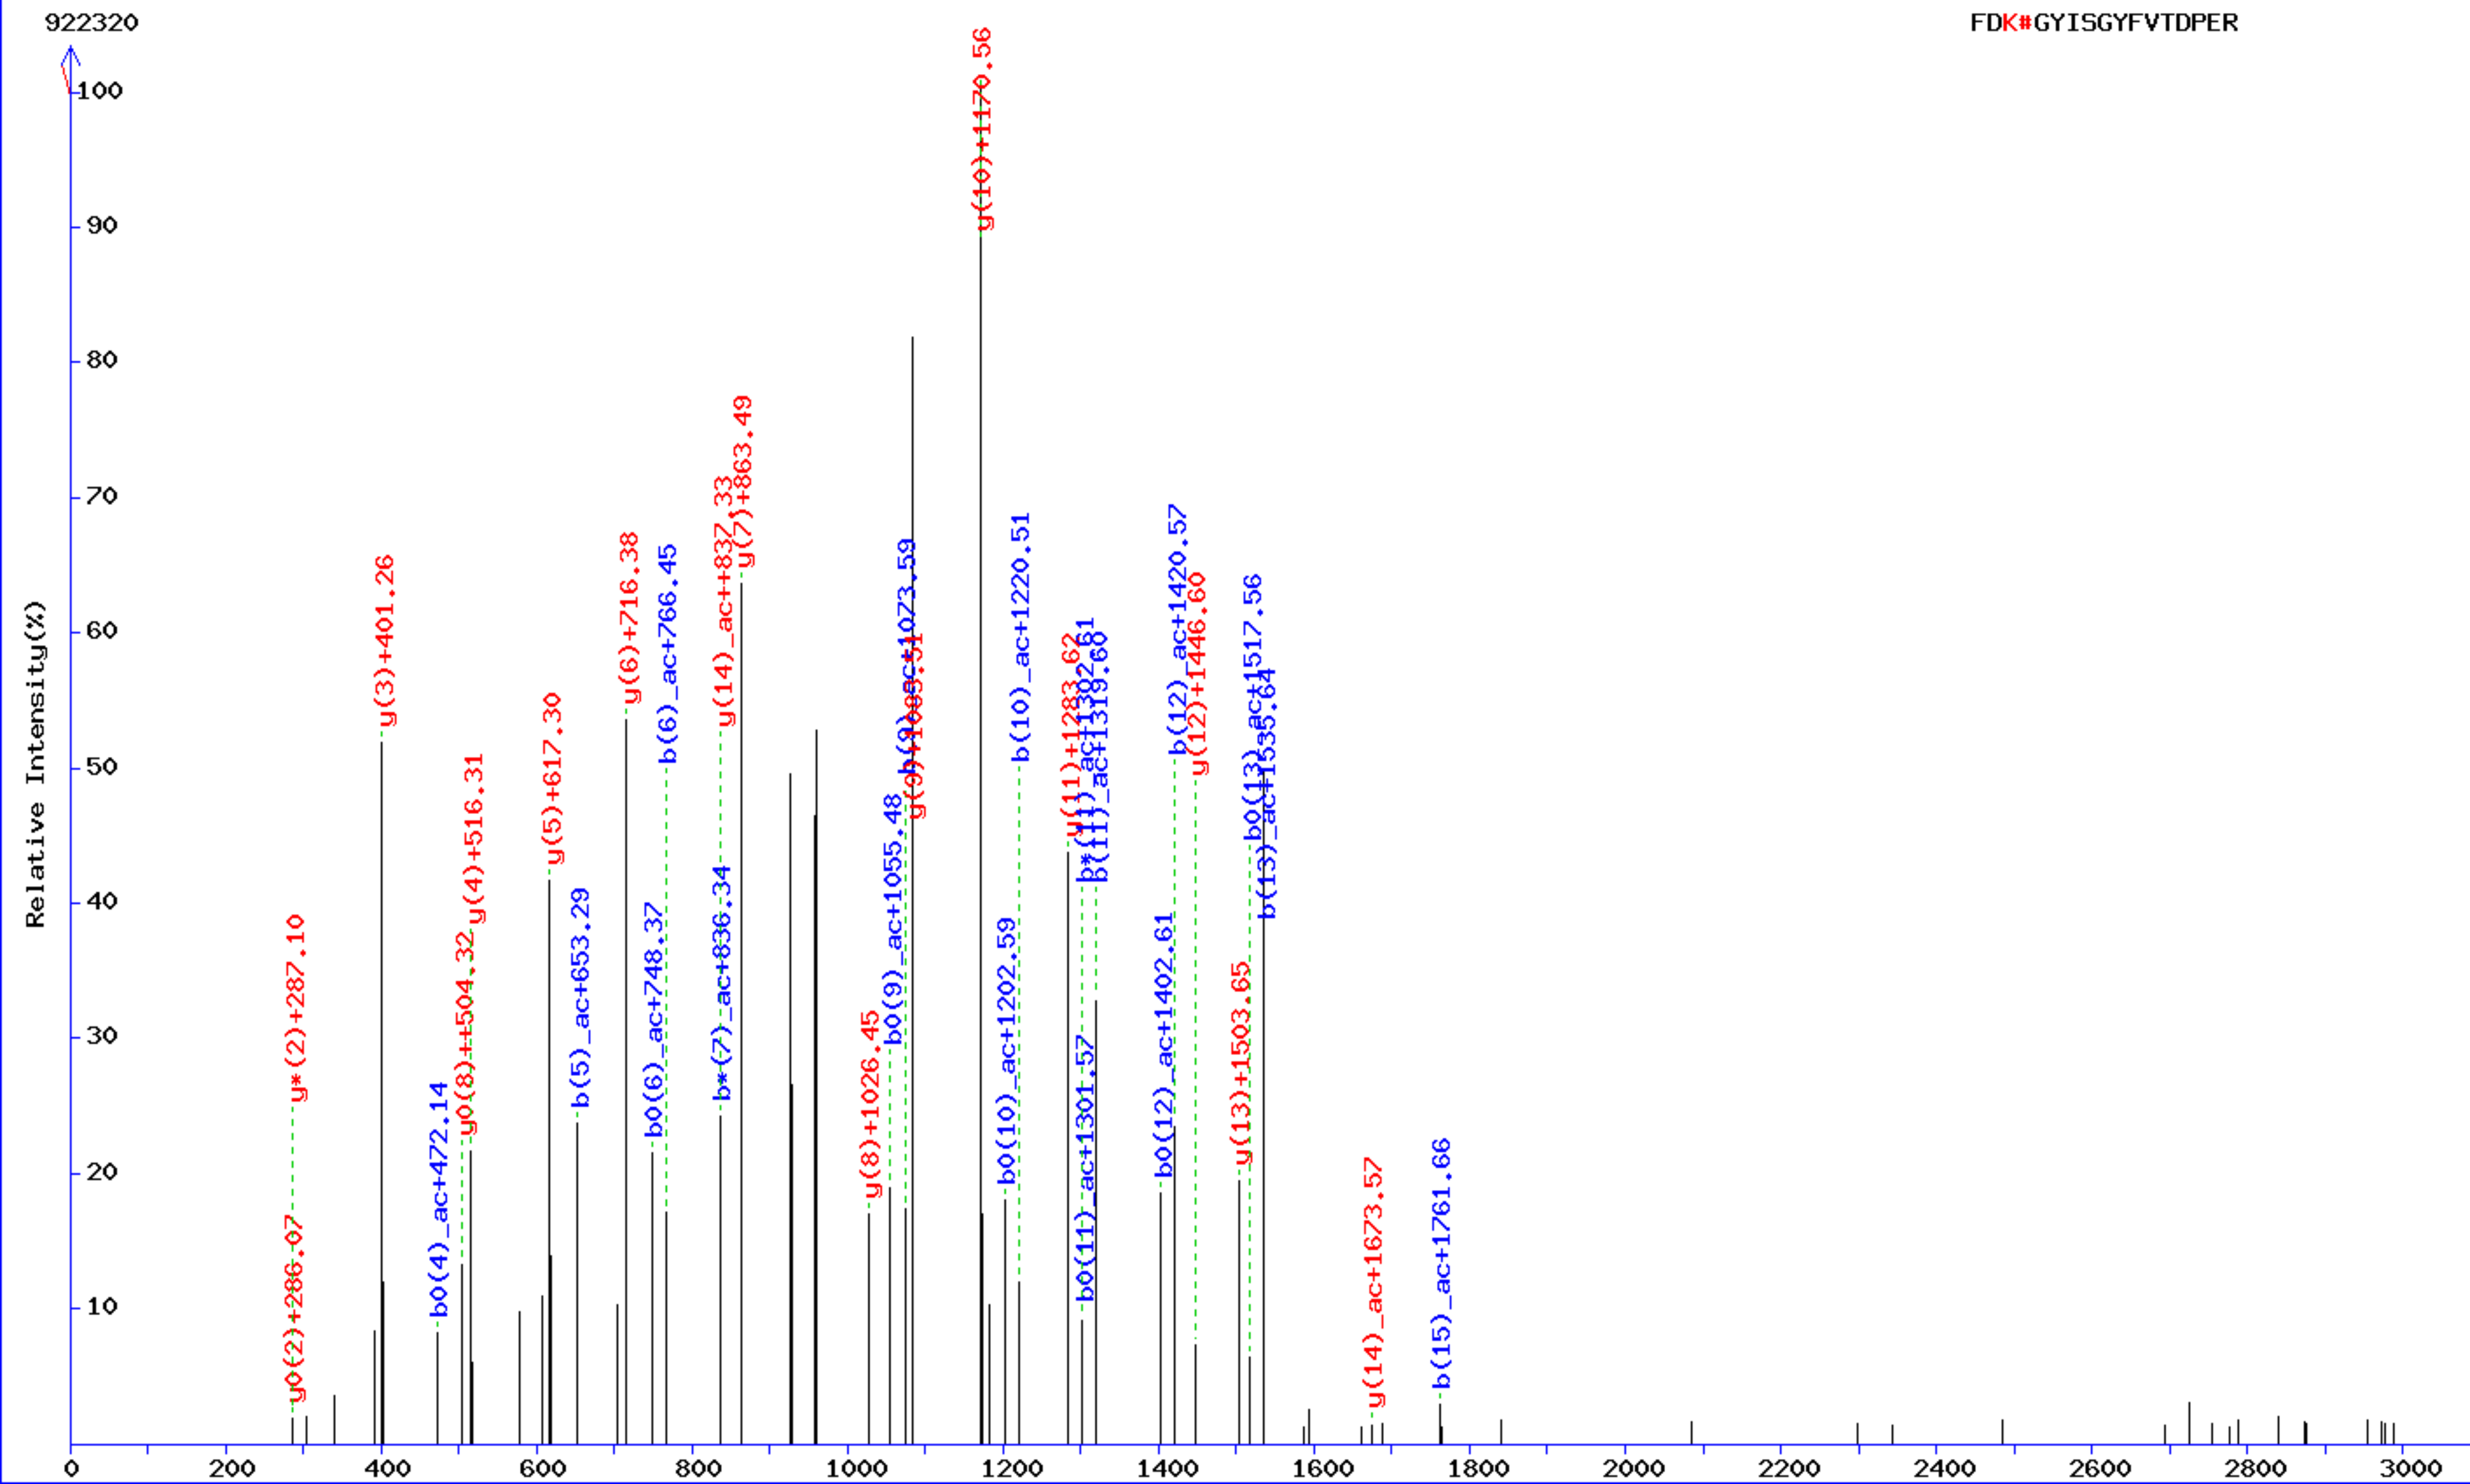



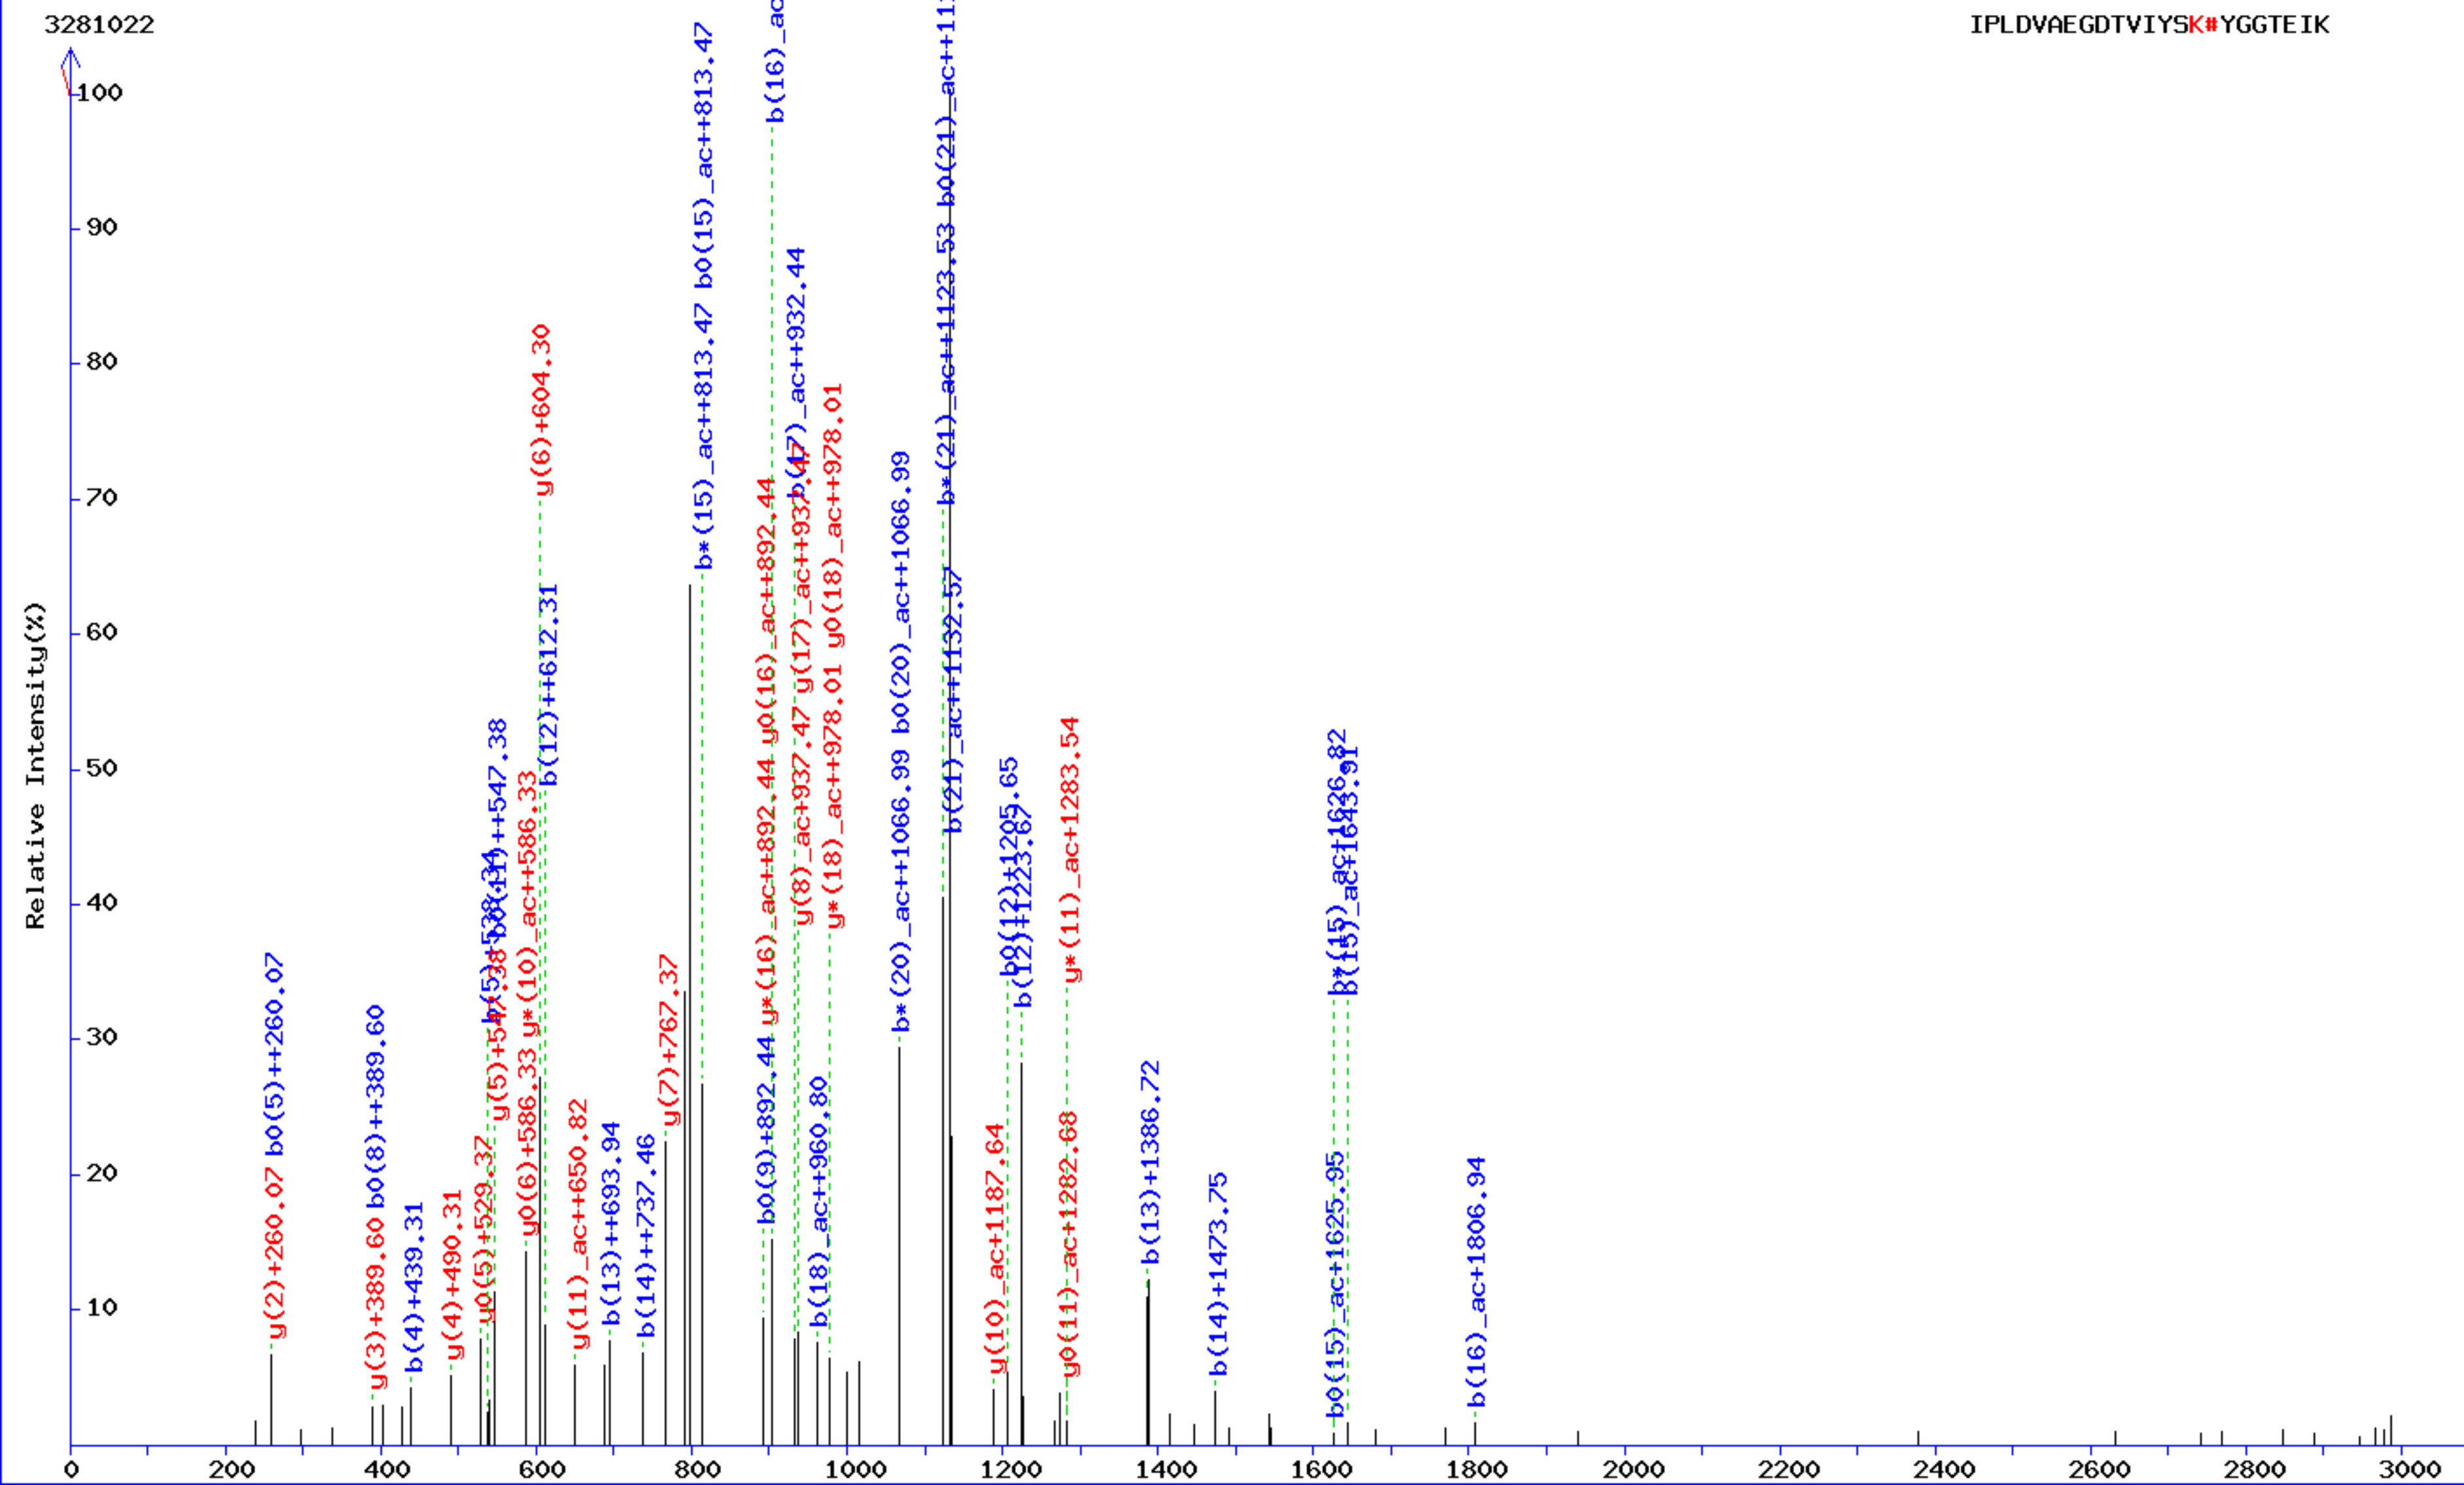

# gi|148660035 MRA\_0278 acyl-CoA synthetase

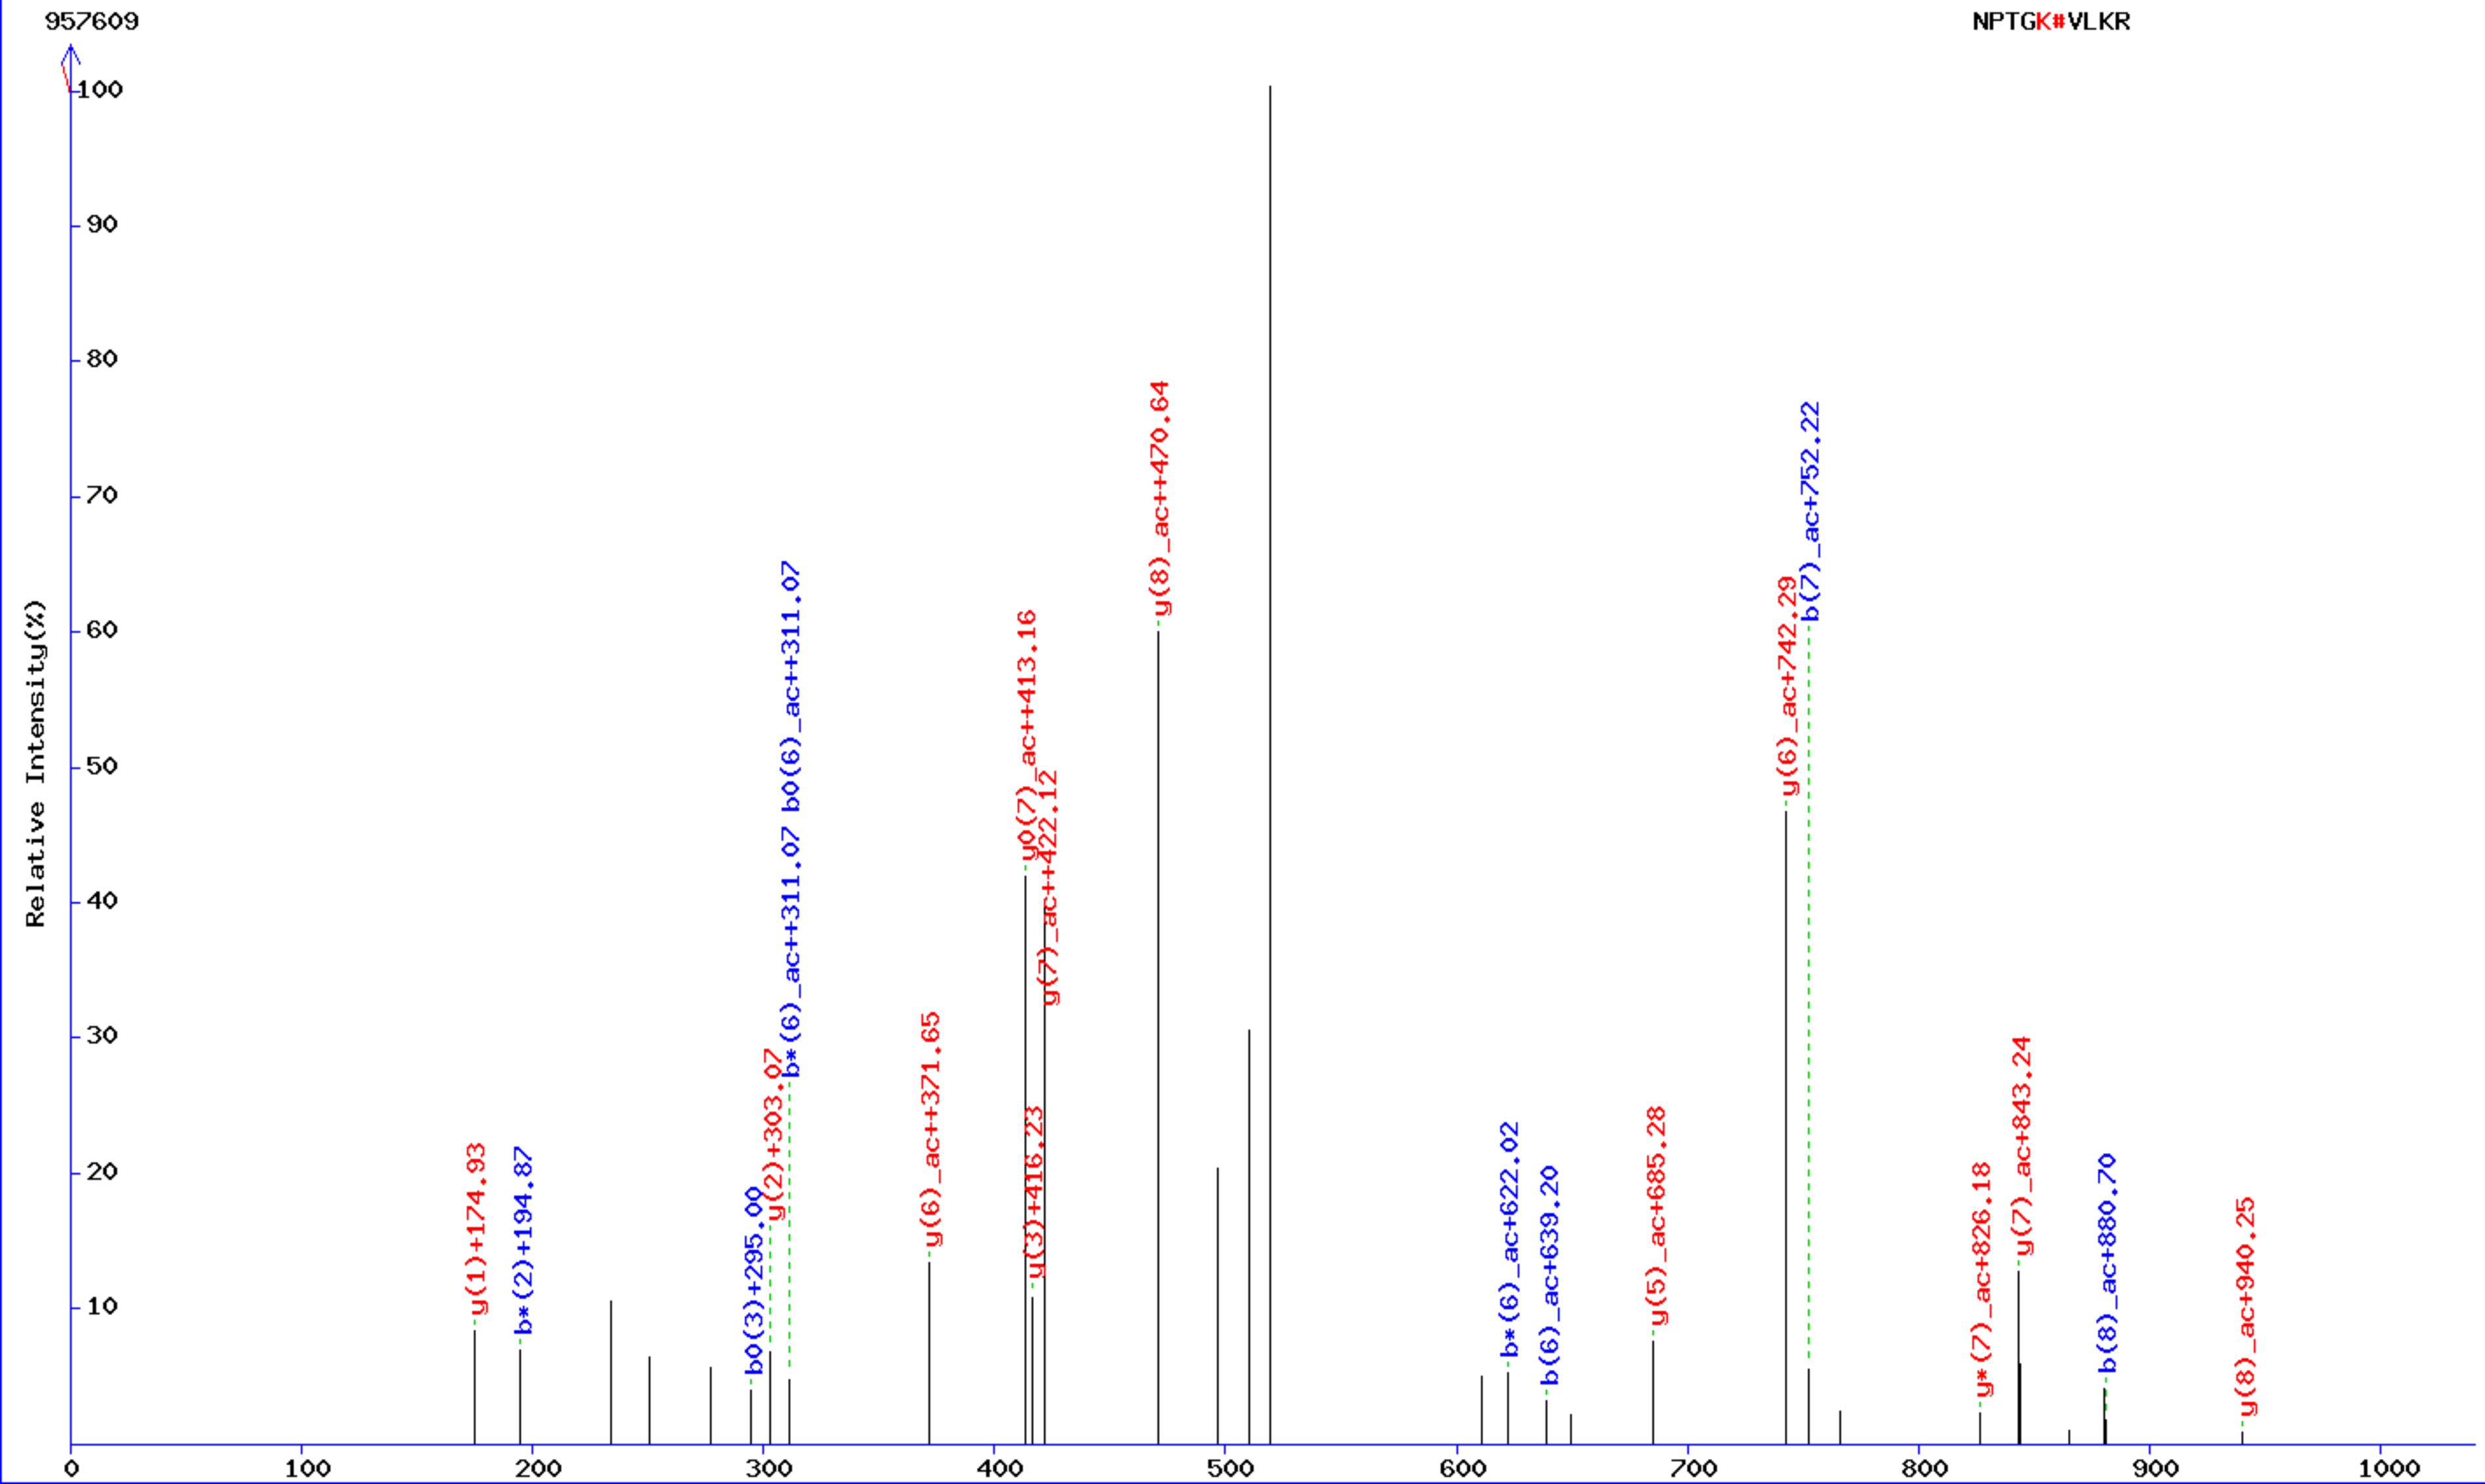

# gi|148660967 MRA\_1190 hypothetical protein

K#ILTPARPVAR

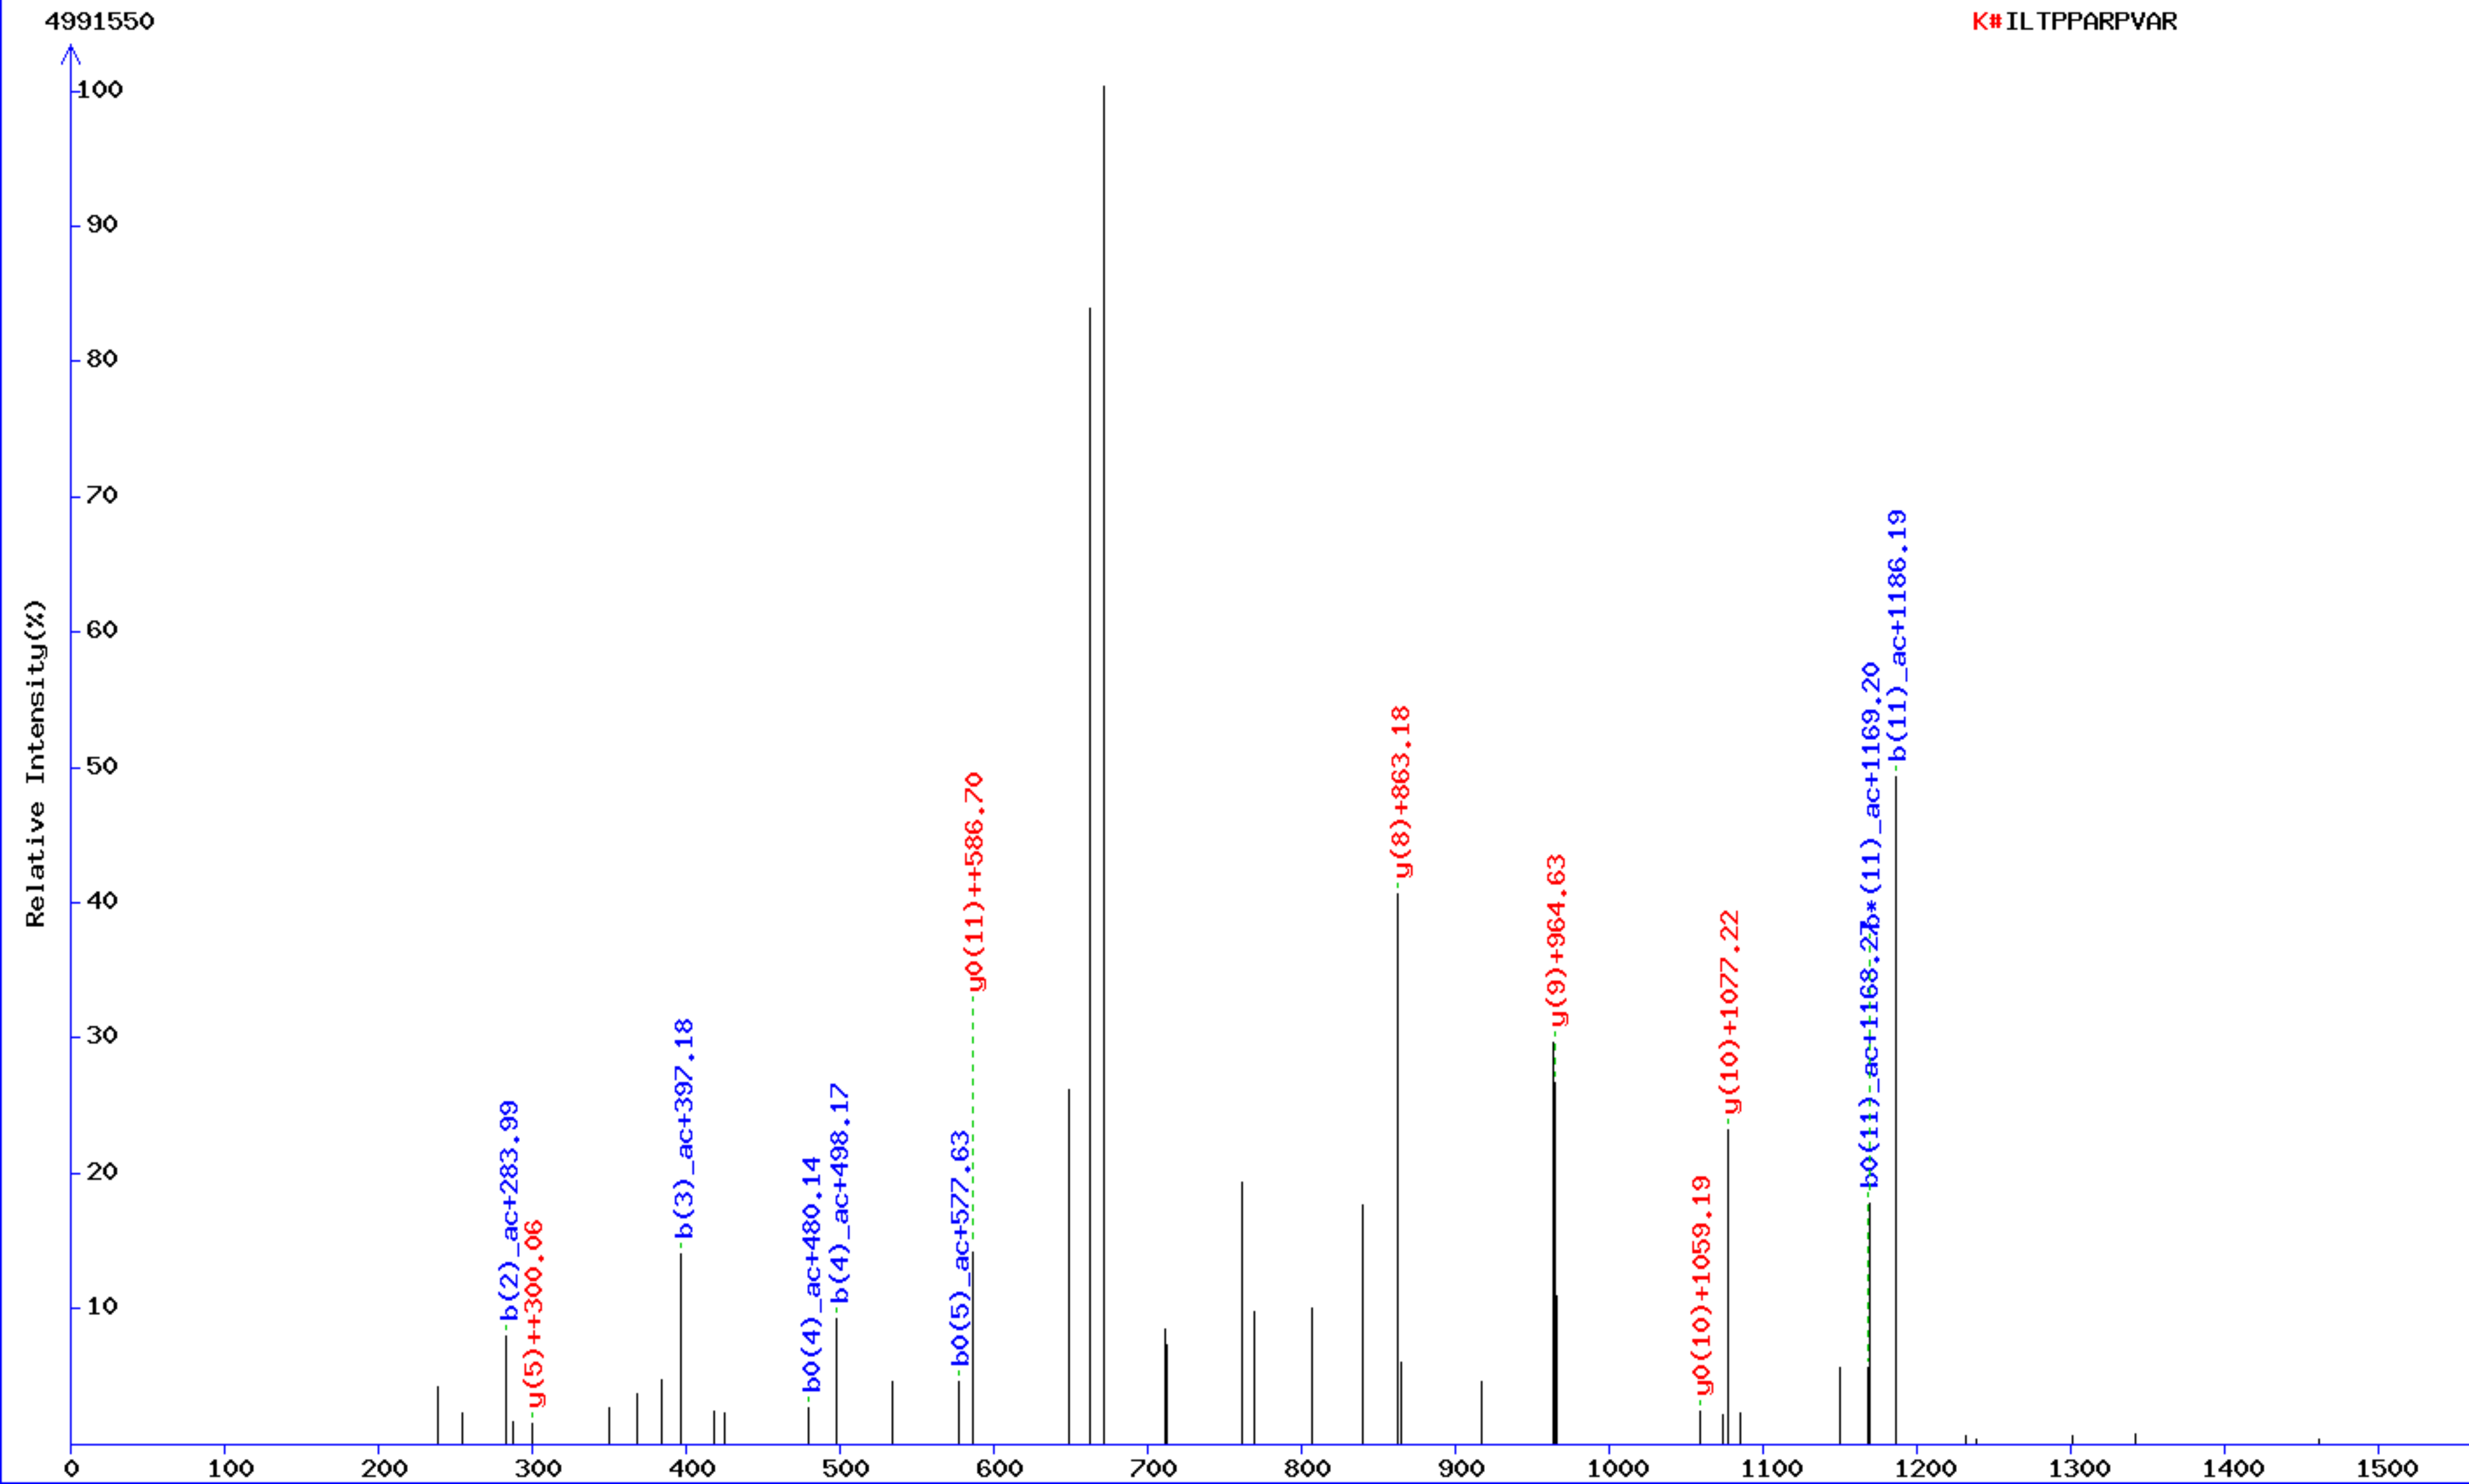

# gi|148661955 MRA\_2154 hypothetical protein

YYVAVHAVK#VEK

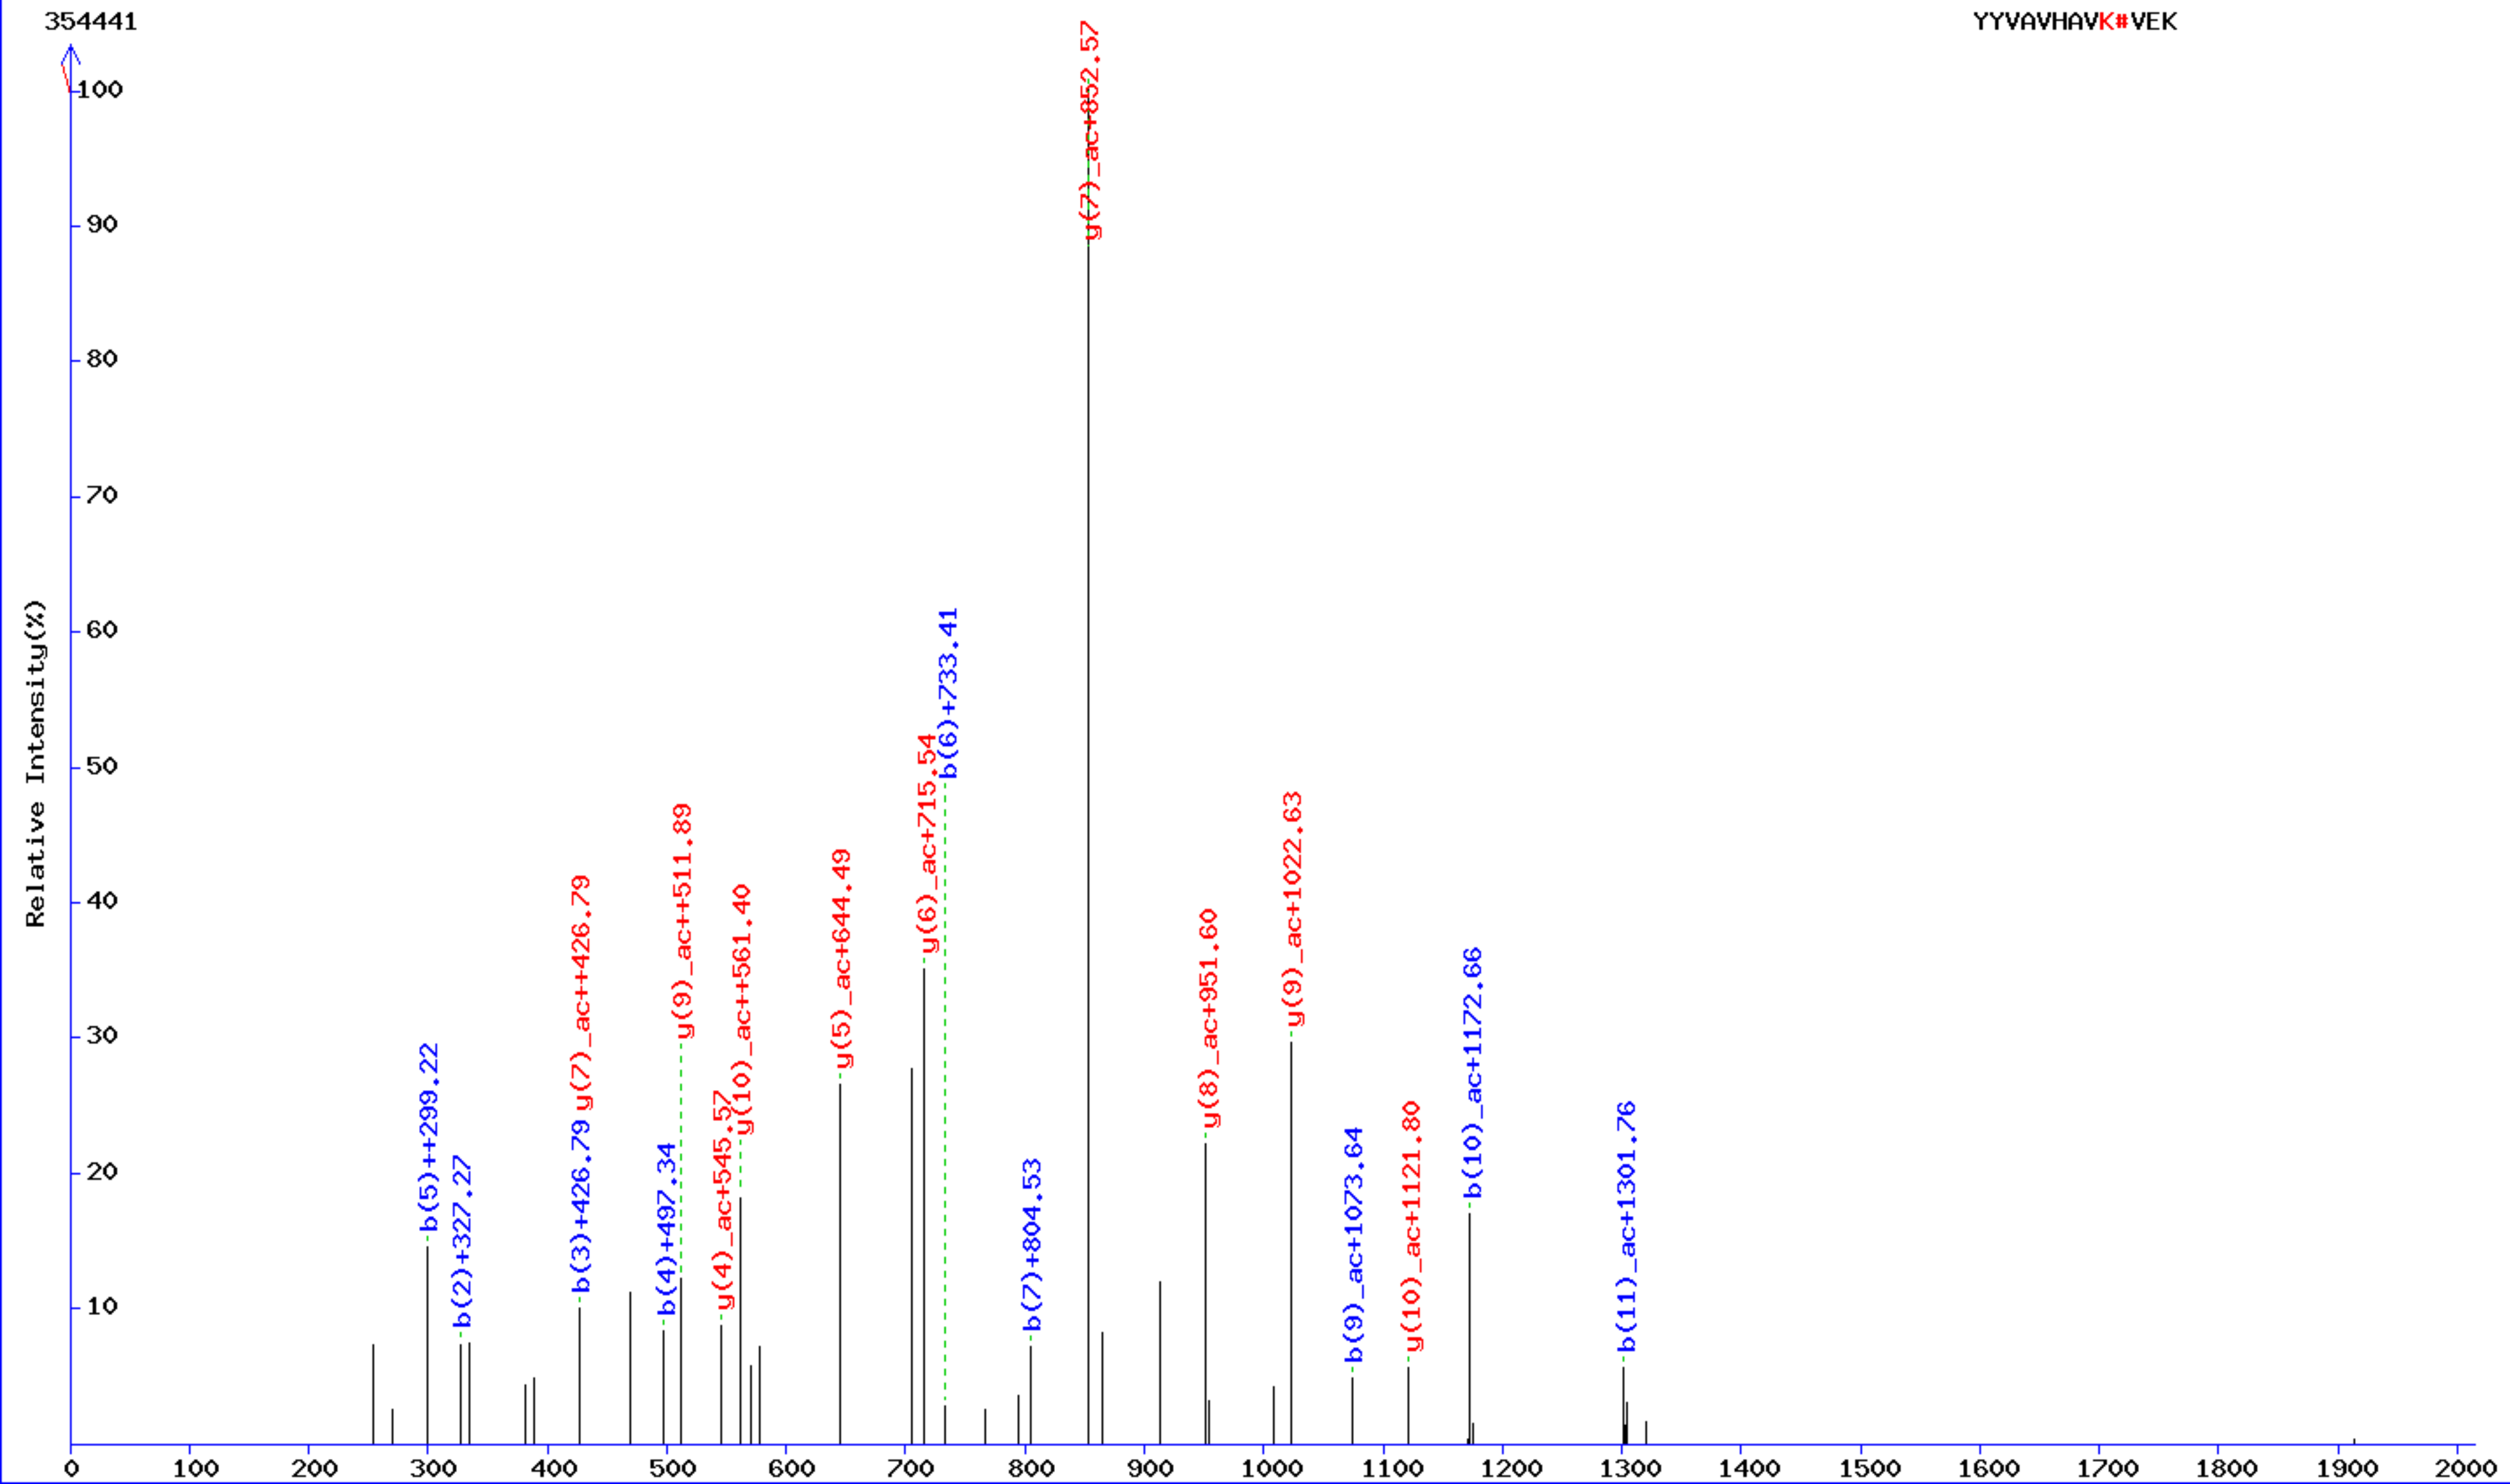

# gi|148662586 MRA\_2770 hypothetical protein

LLSQLEQAK#MQEQVSASLR

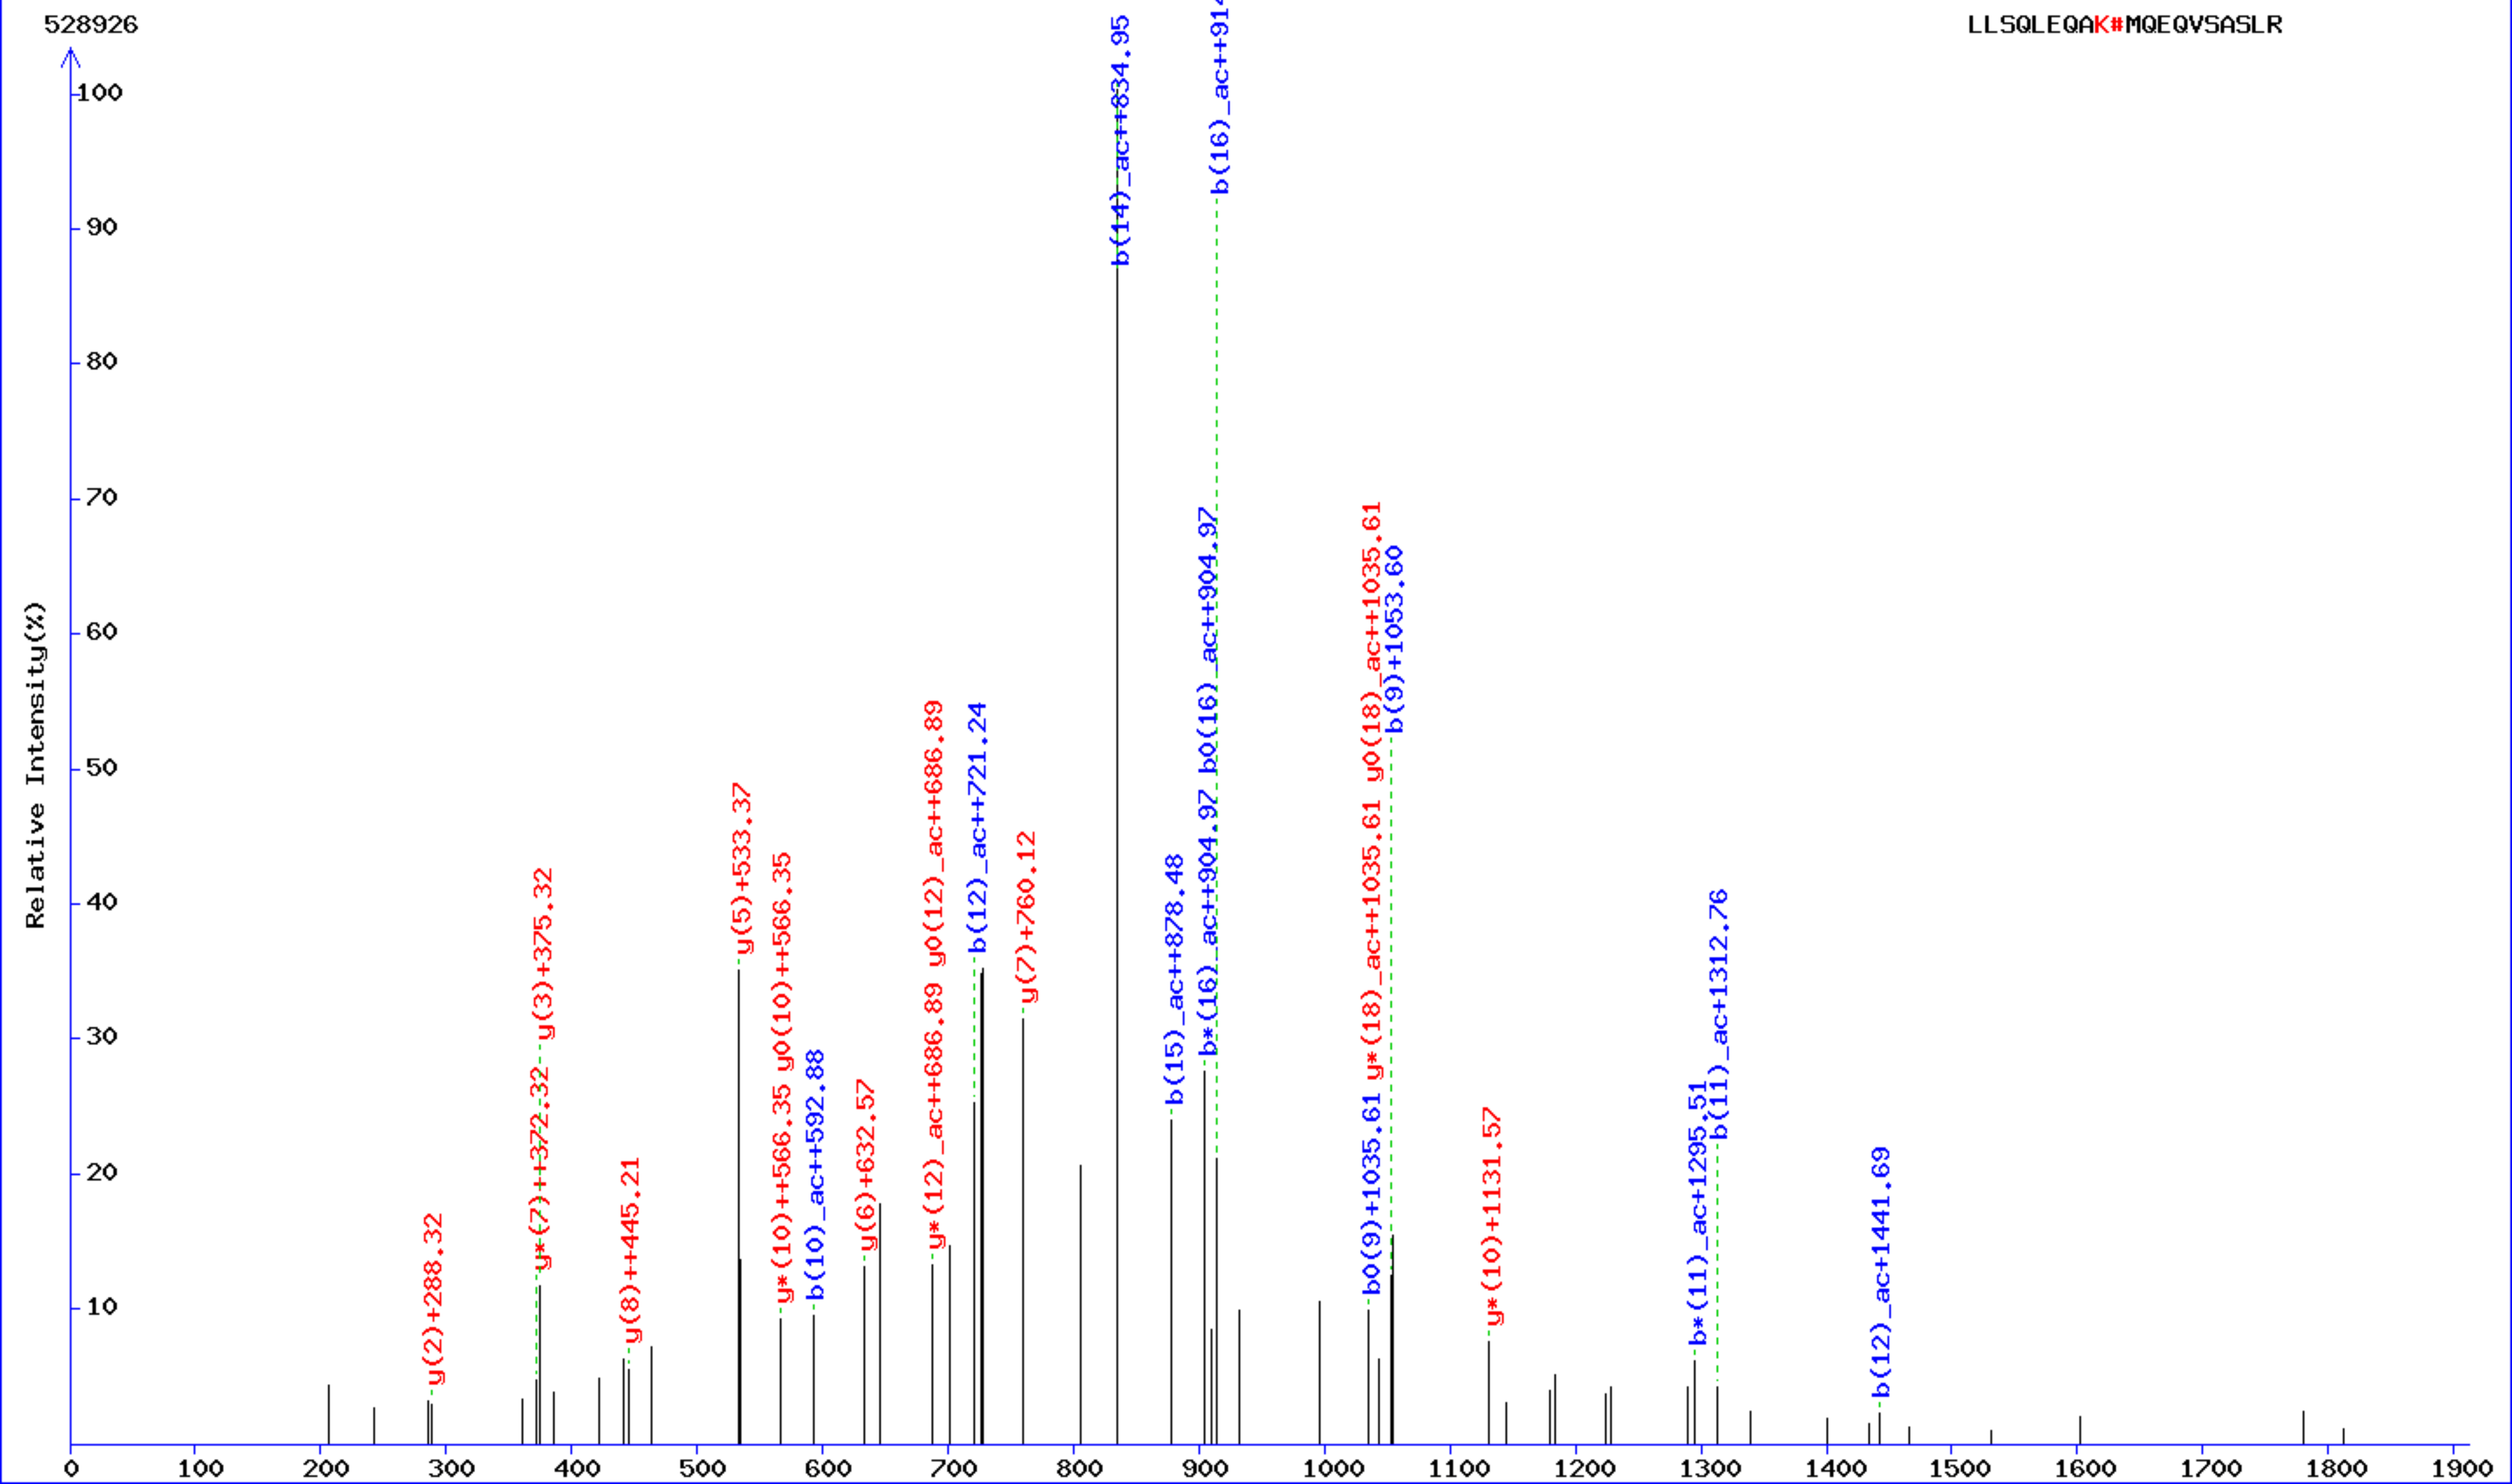

# gi|148660947 MRA\_1170 pterin-4-alpha-carbinolamine dehydratase

SIK#FPTFMAGIDAVR

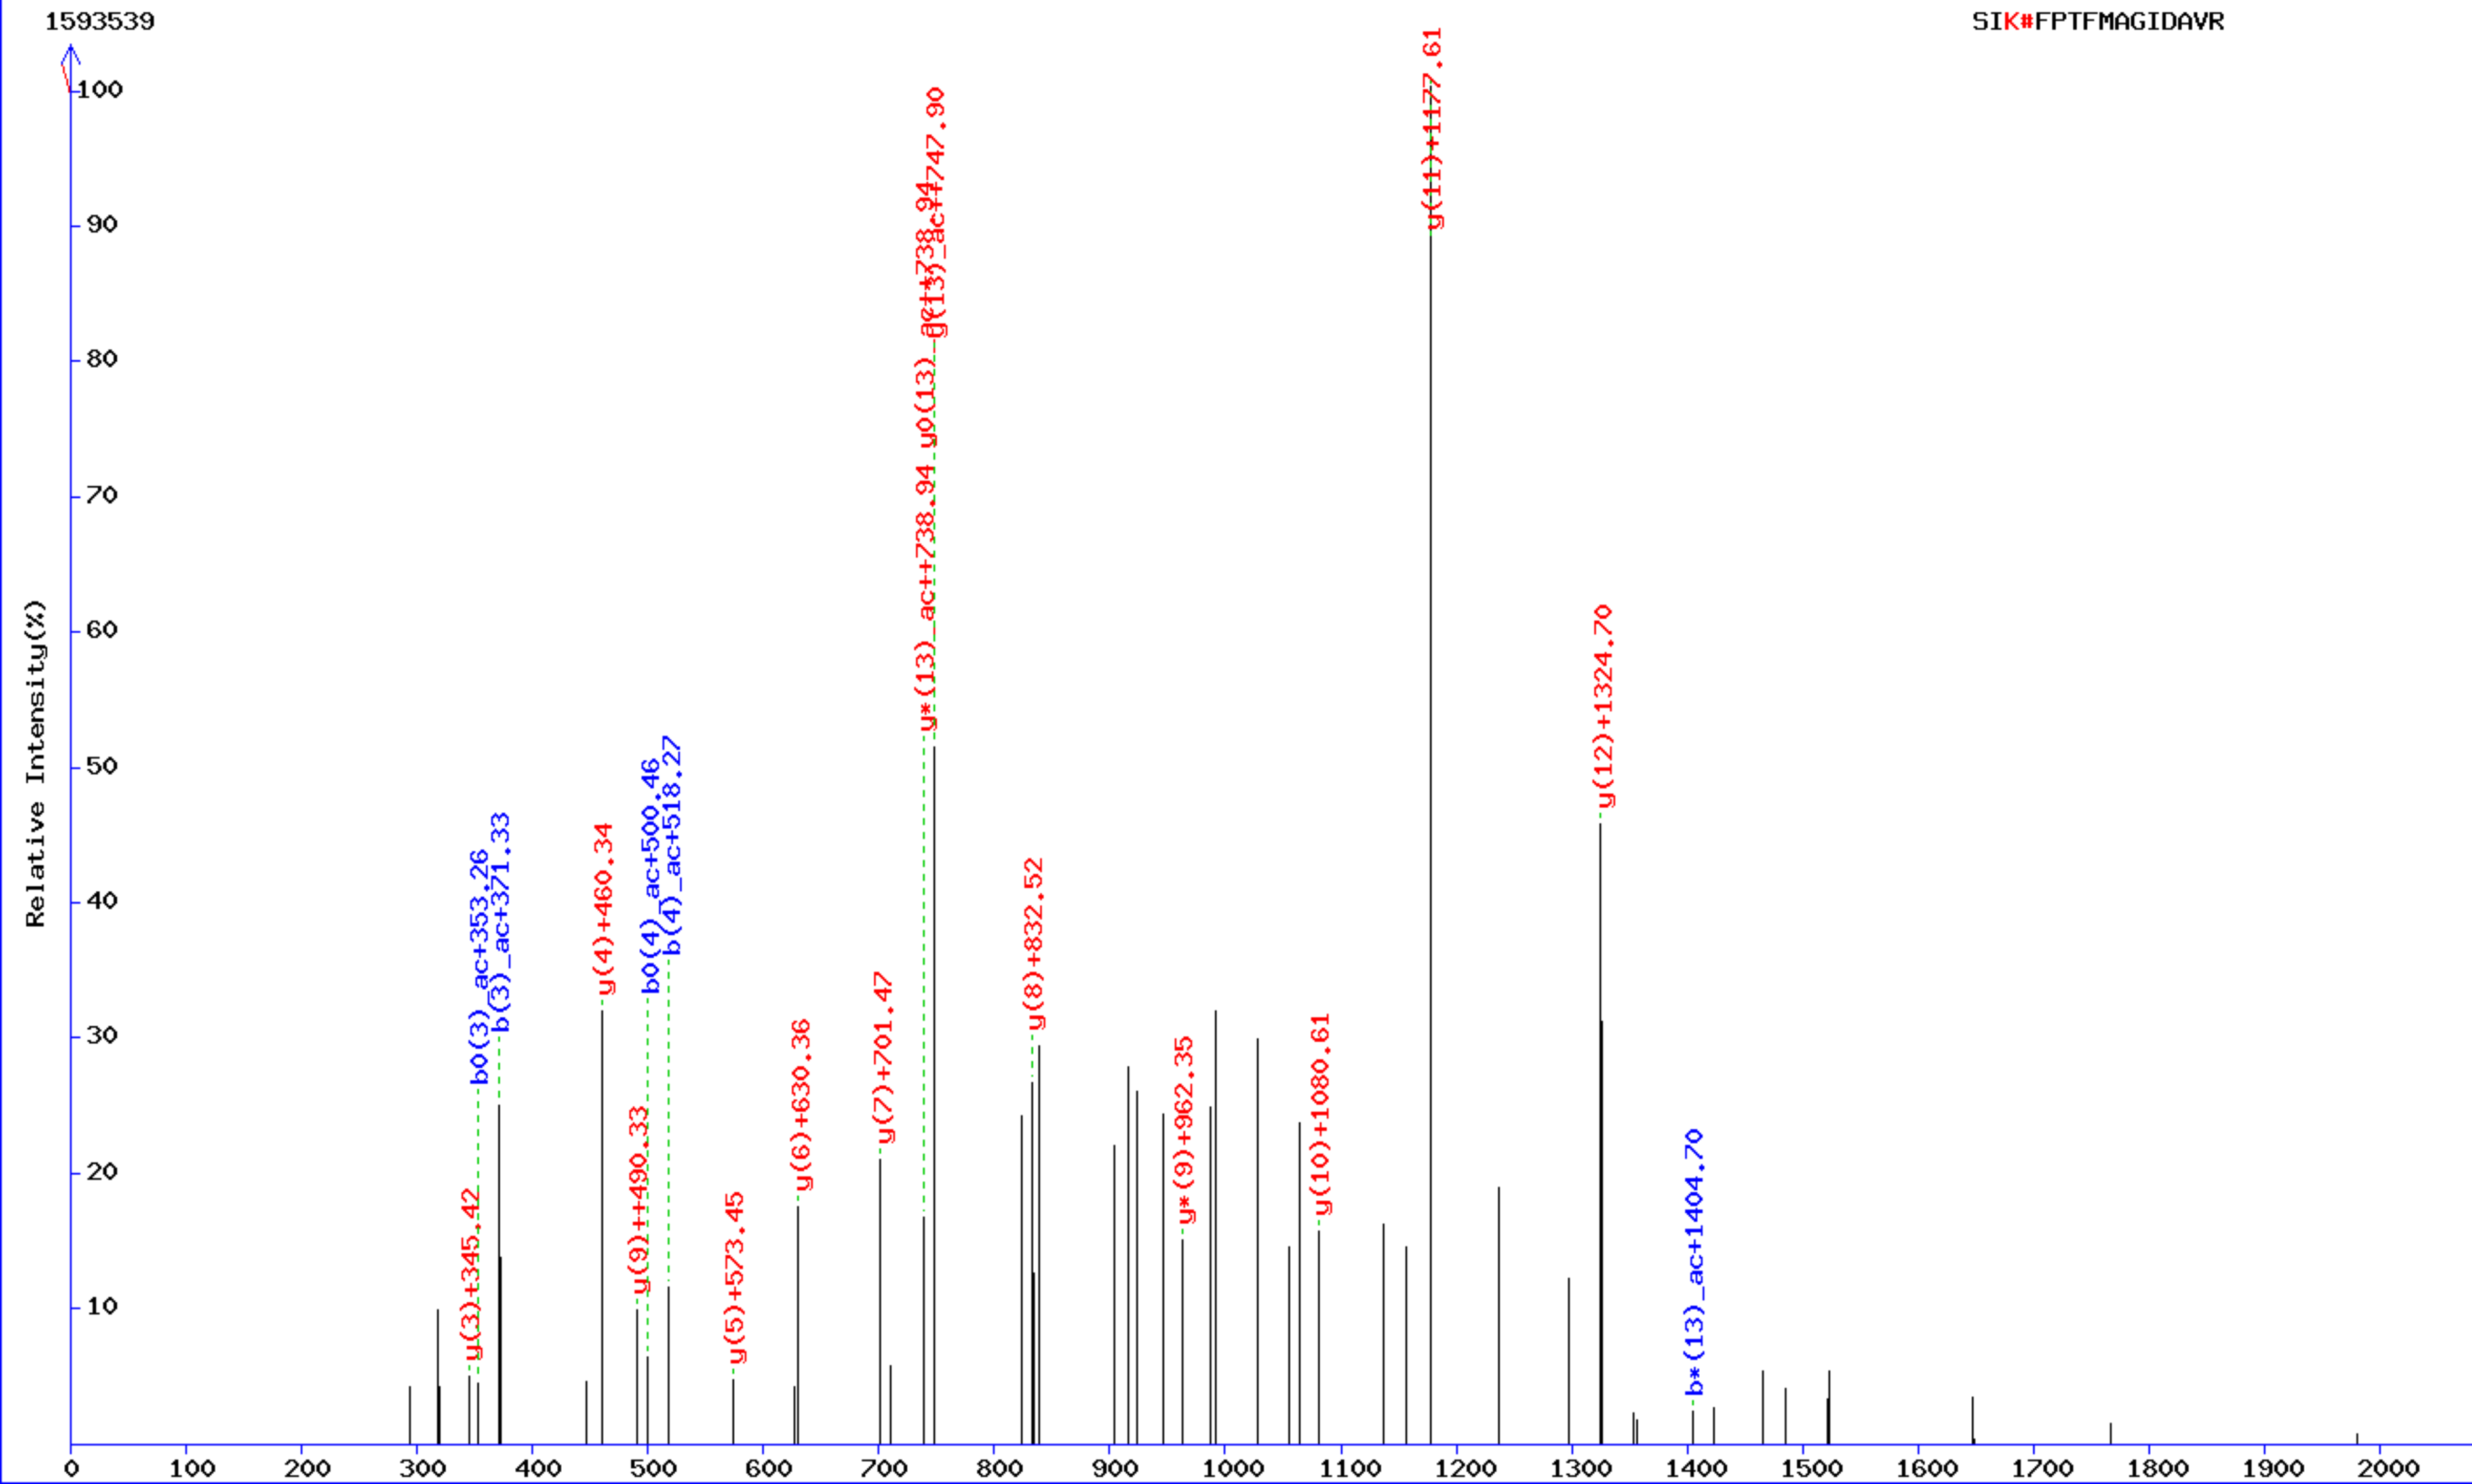

# gi|148660205 MRA\_0445 molecular chaperone GroEL

LEGDEATGANIVK#VALEAPLK

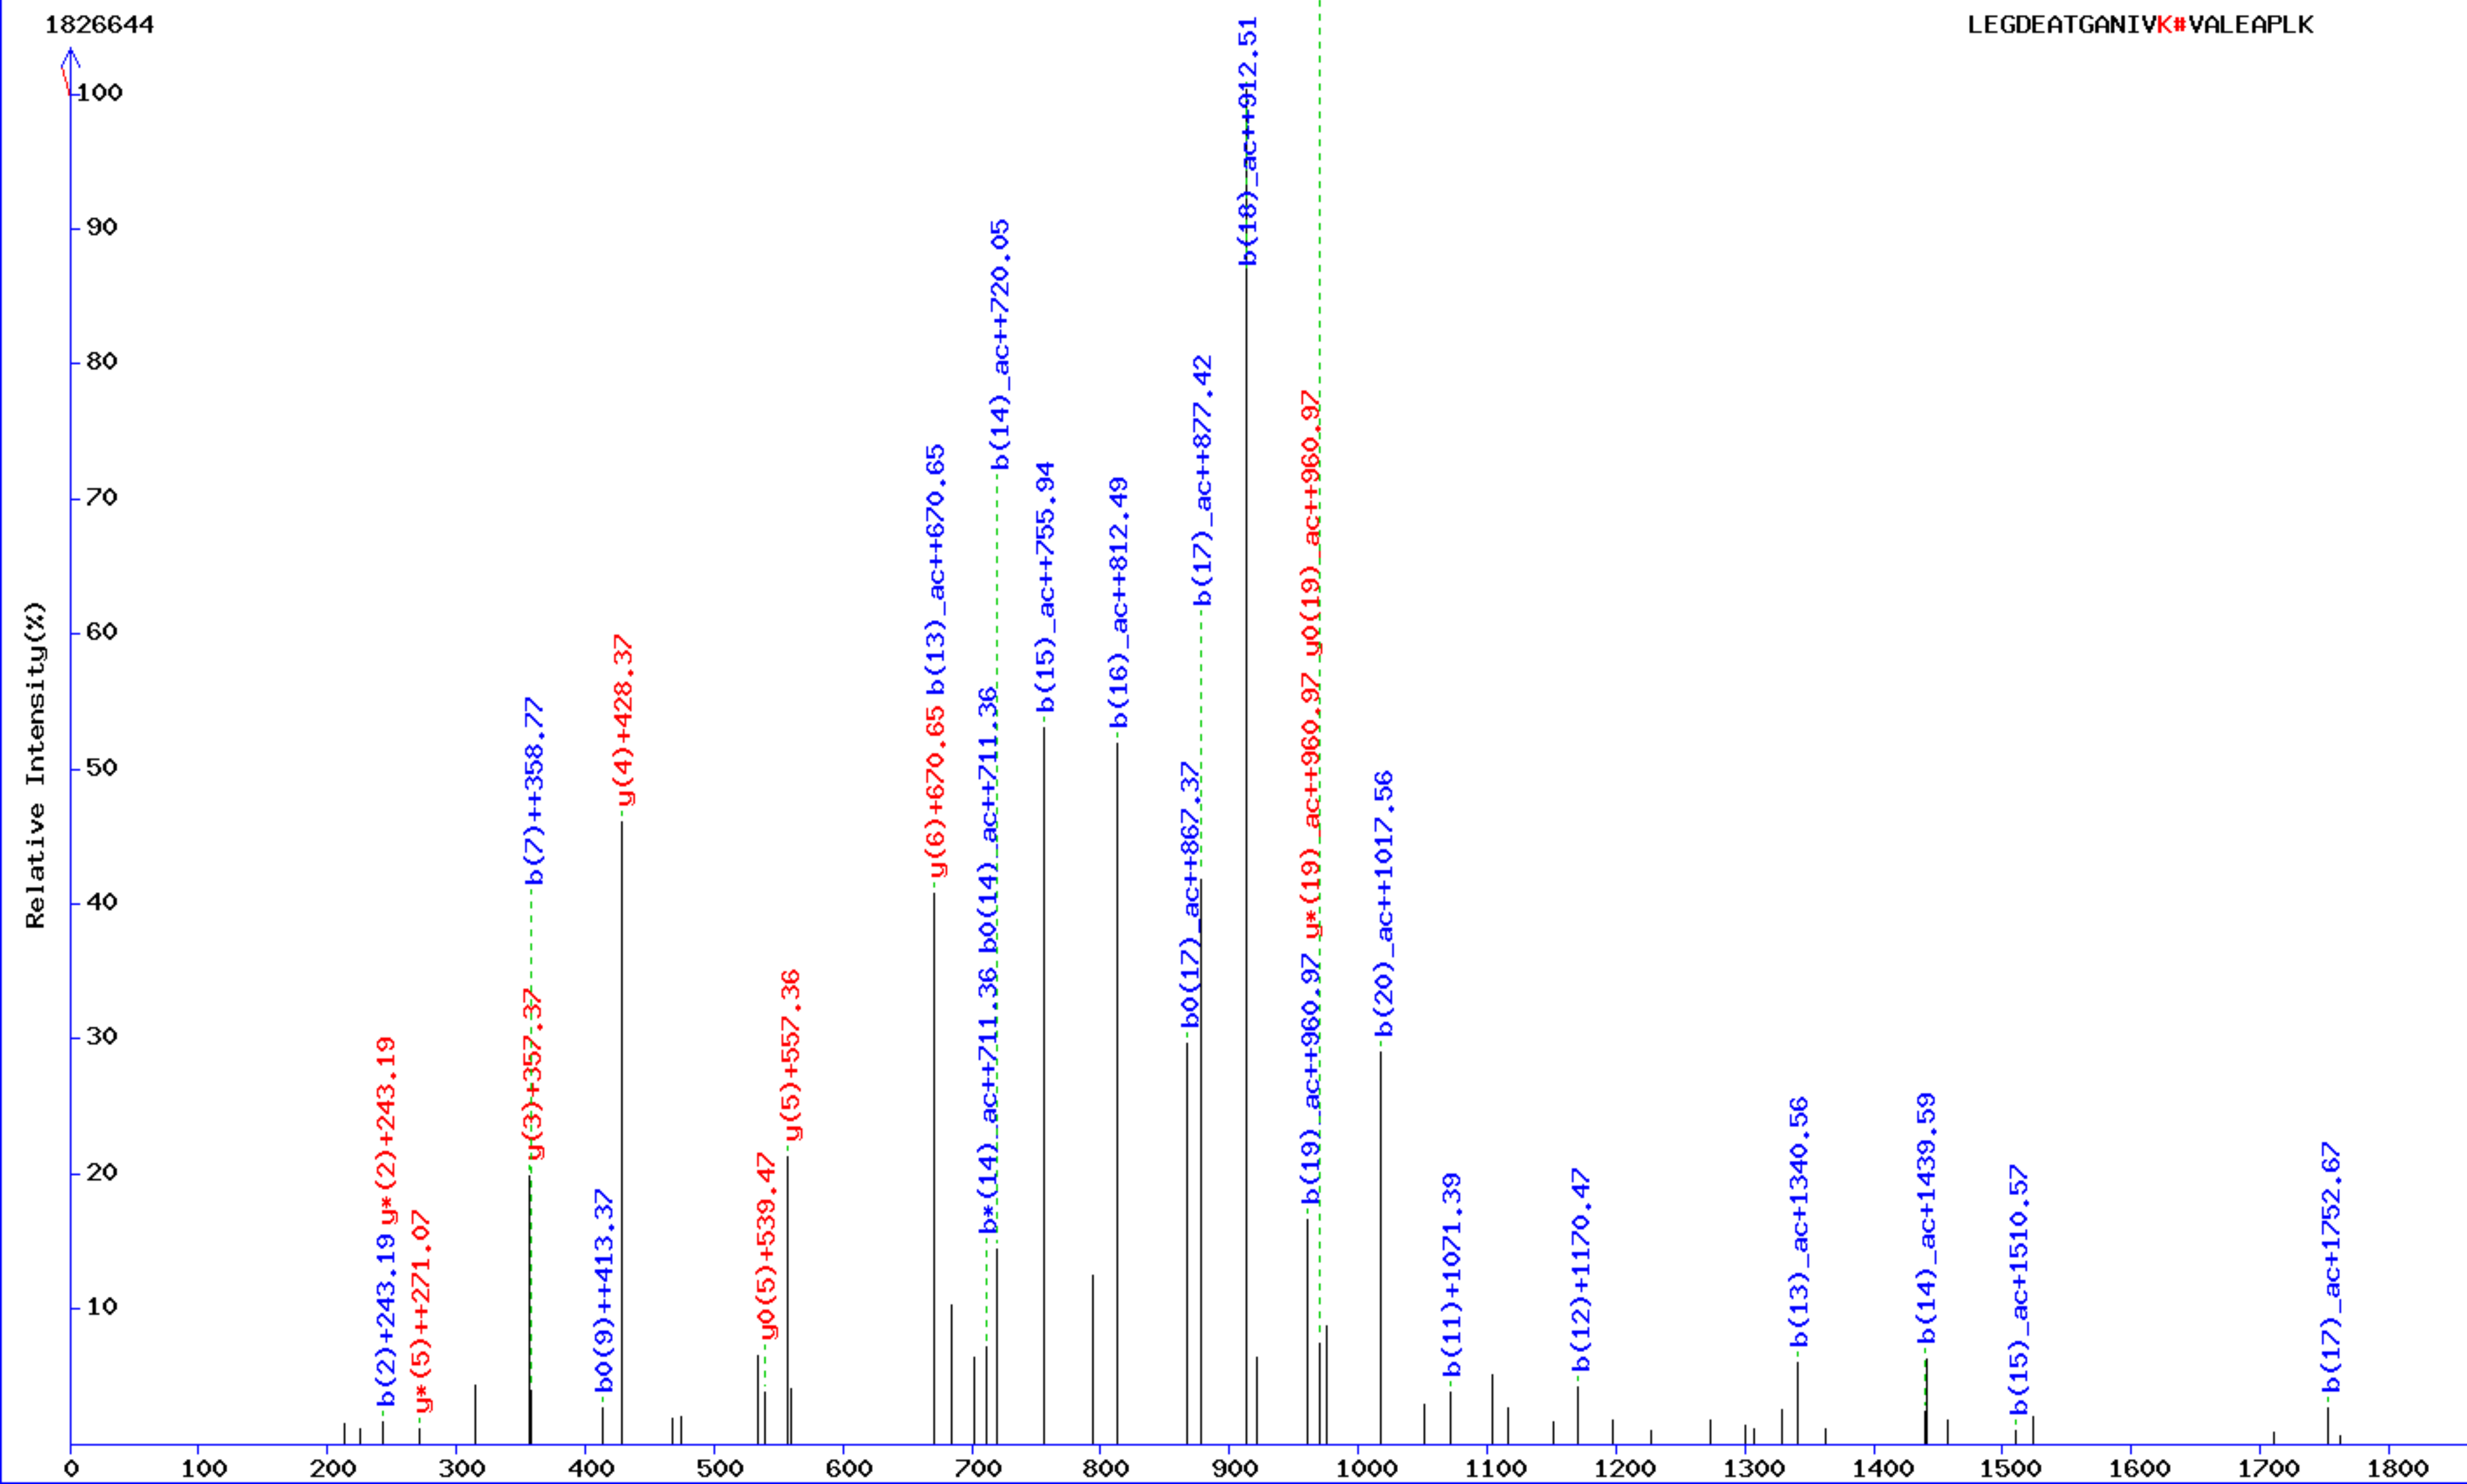

# gi|148660799 MRA\_1025 ribose-phosphate pyrophosphokinase

IAEK#WADALGGVPLAFIHK

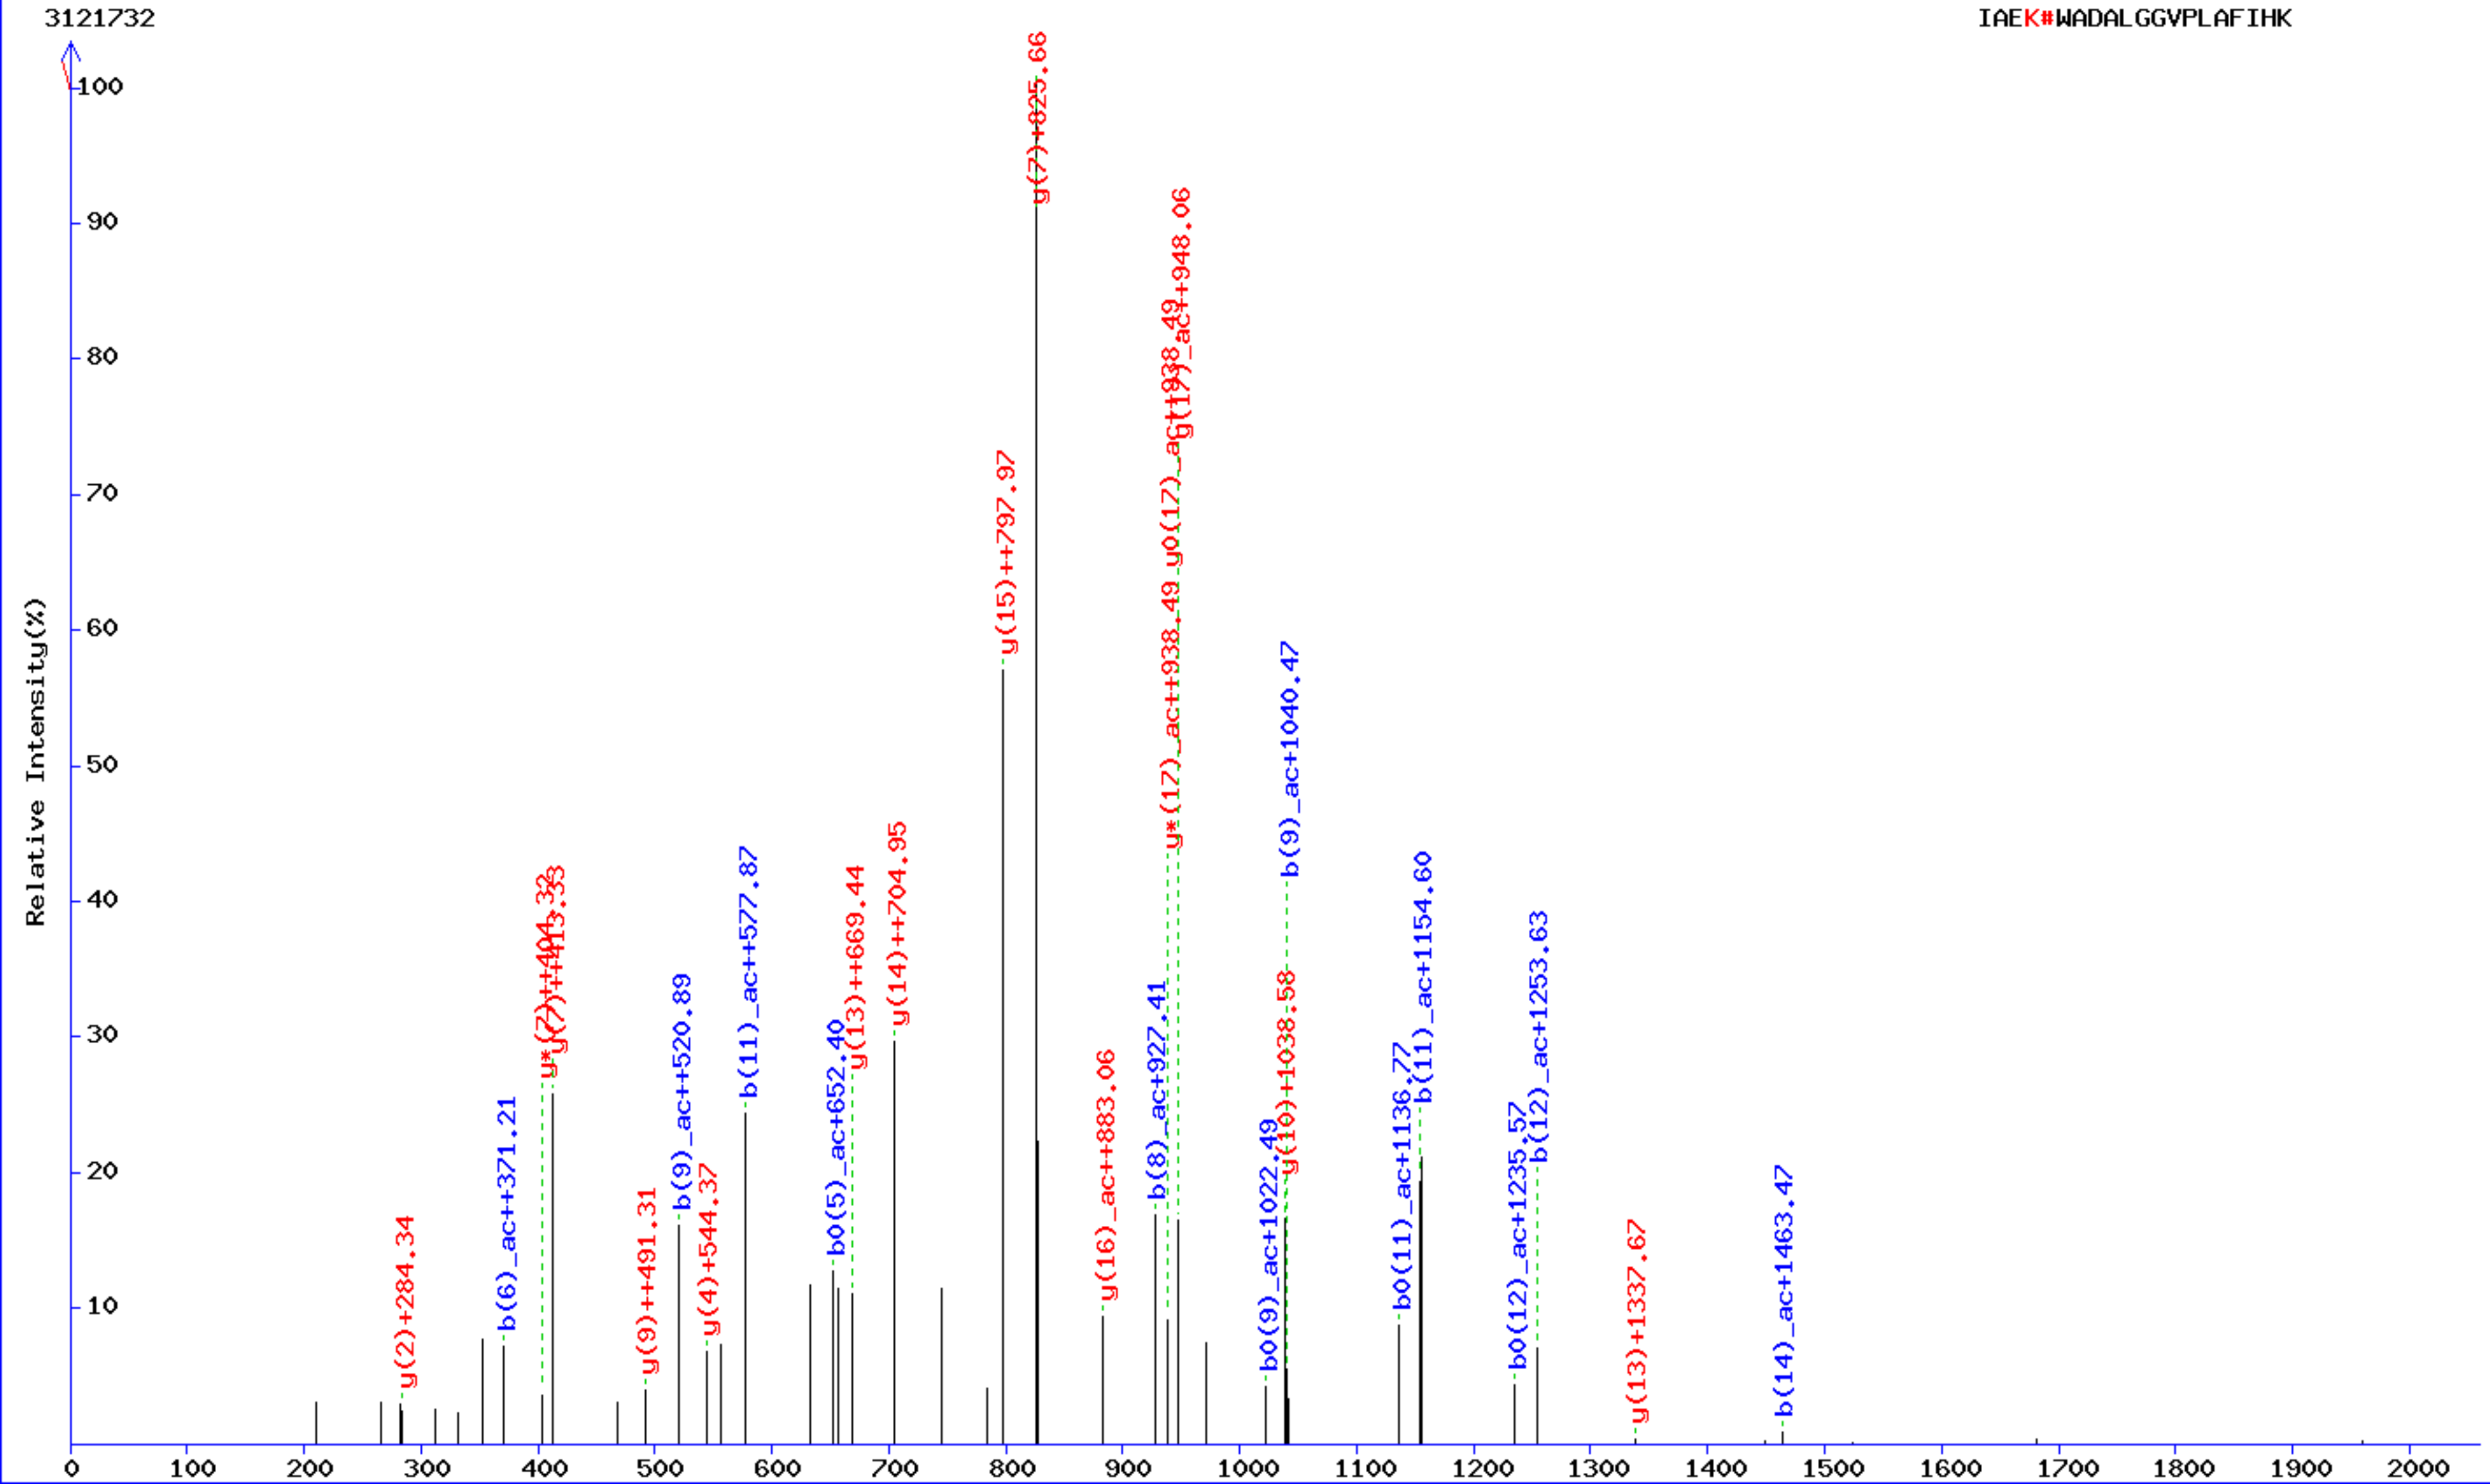



# gi|148662825 MRA\_3004 50S ribosomal protein L28

LNVCTSCI**K**#AGK

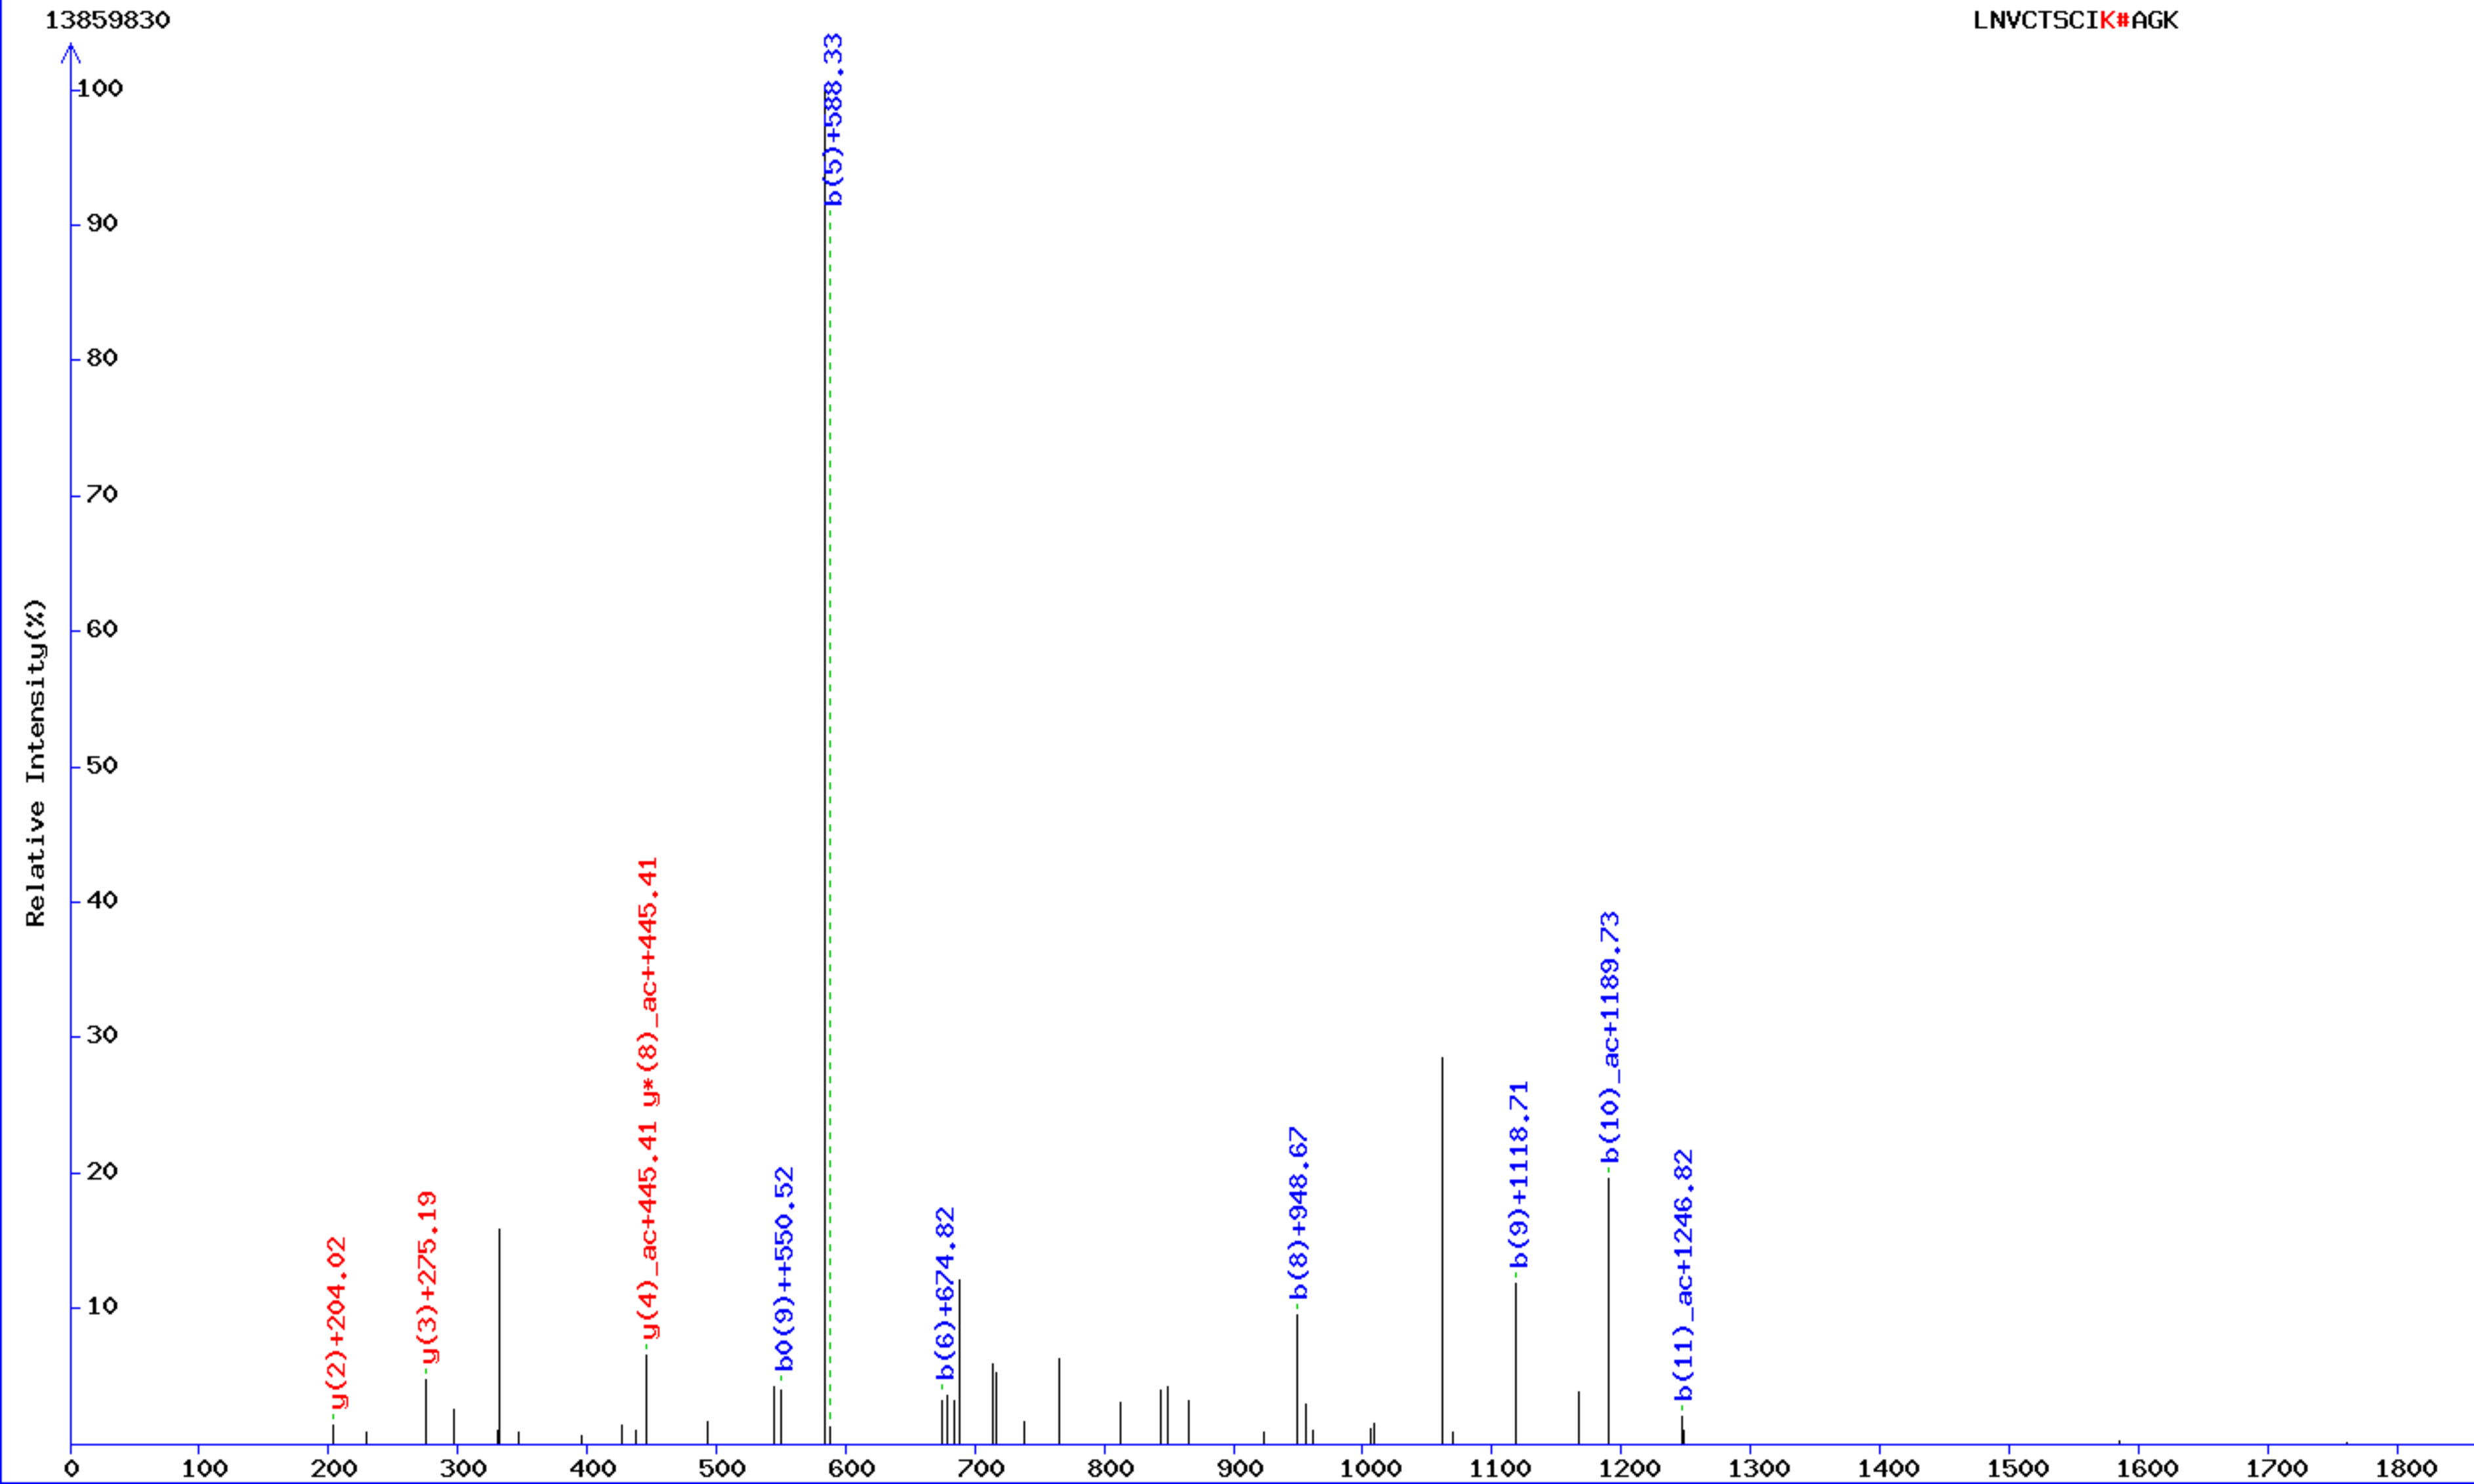

# gi|148659826 MRA\_0068 isocitrate dehydrogenase (NADP) Icd2

TIVLK#PEVPLDDGDVIDSMFMSK

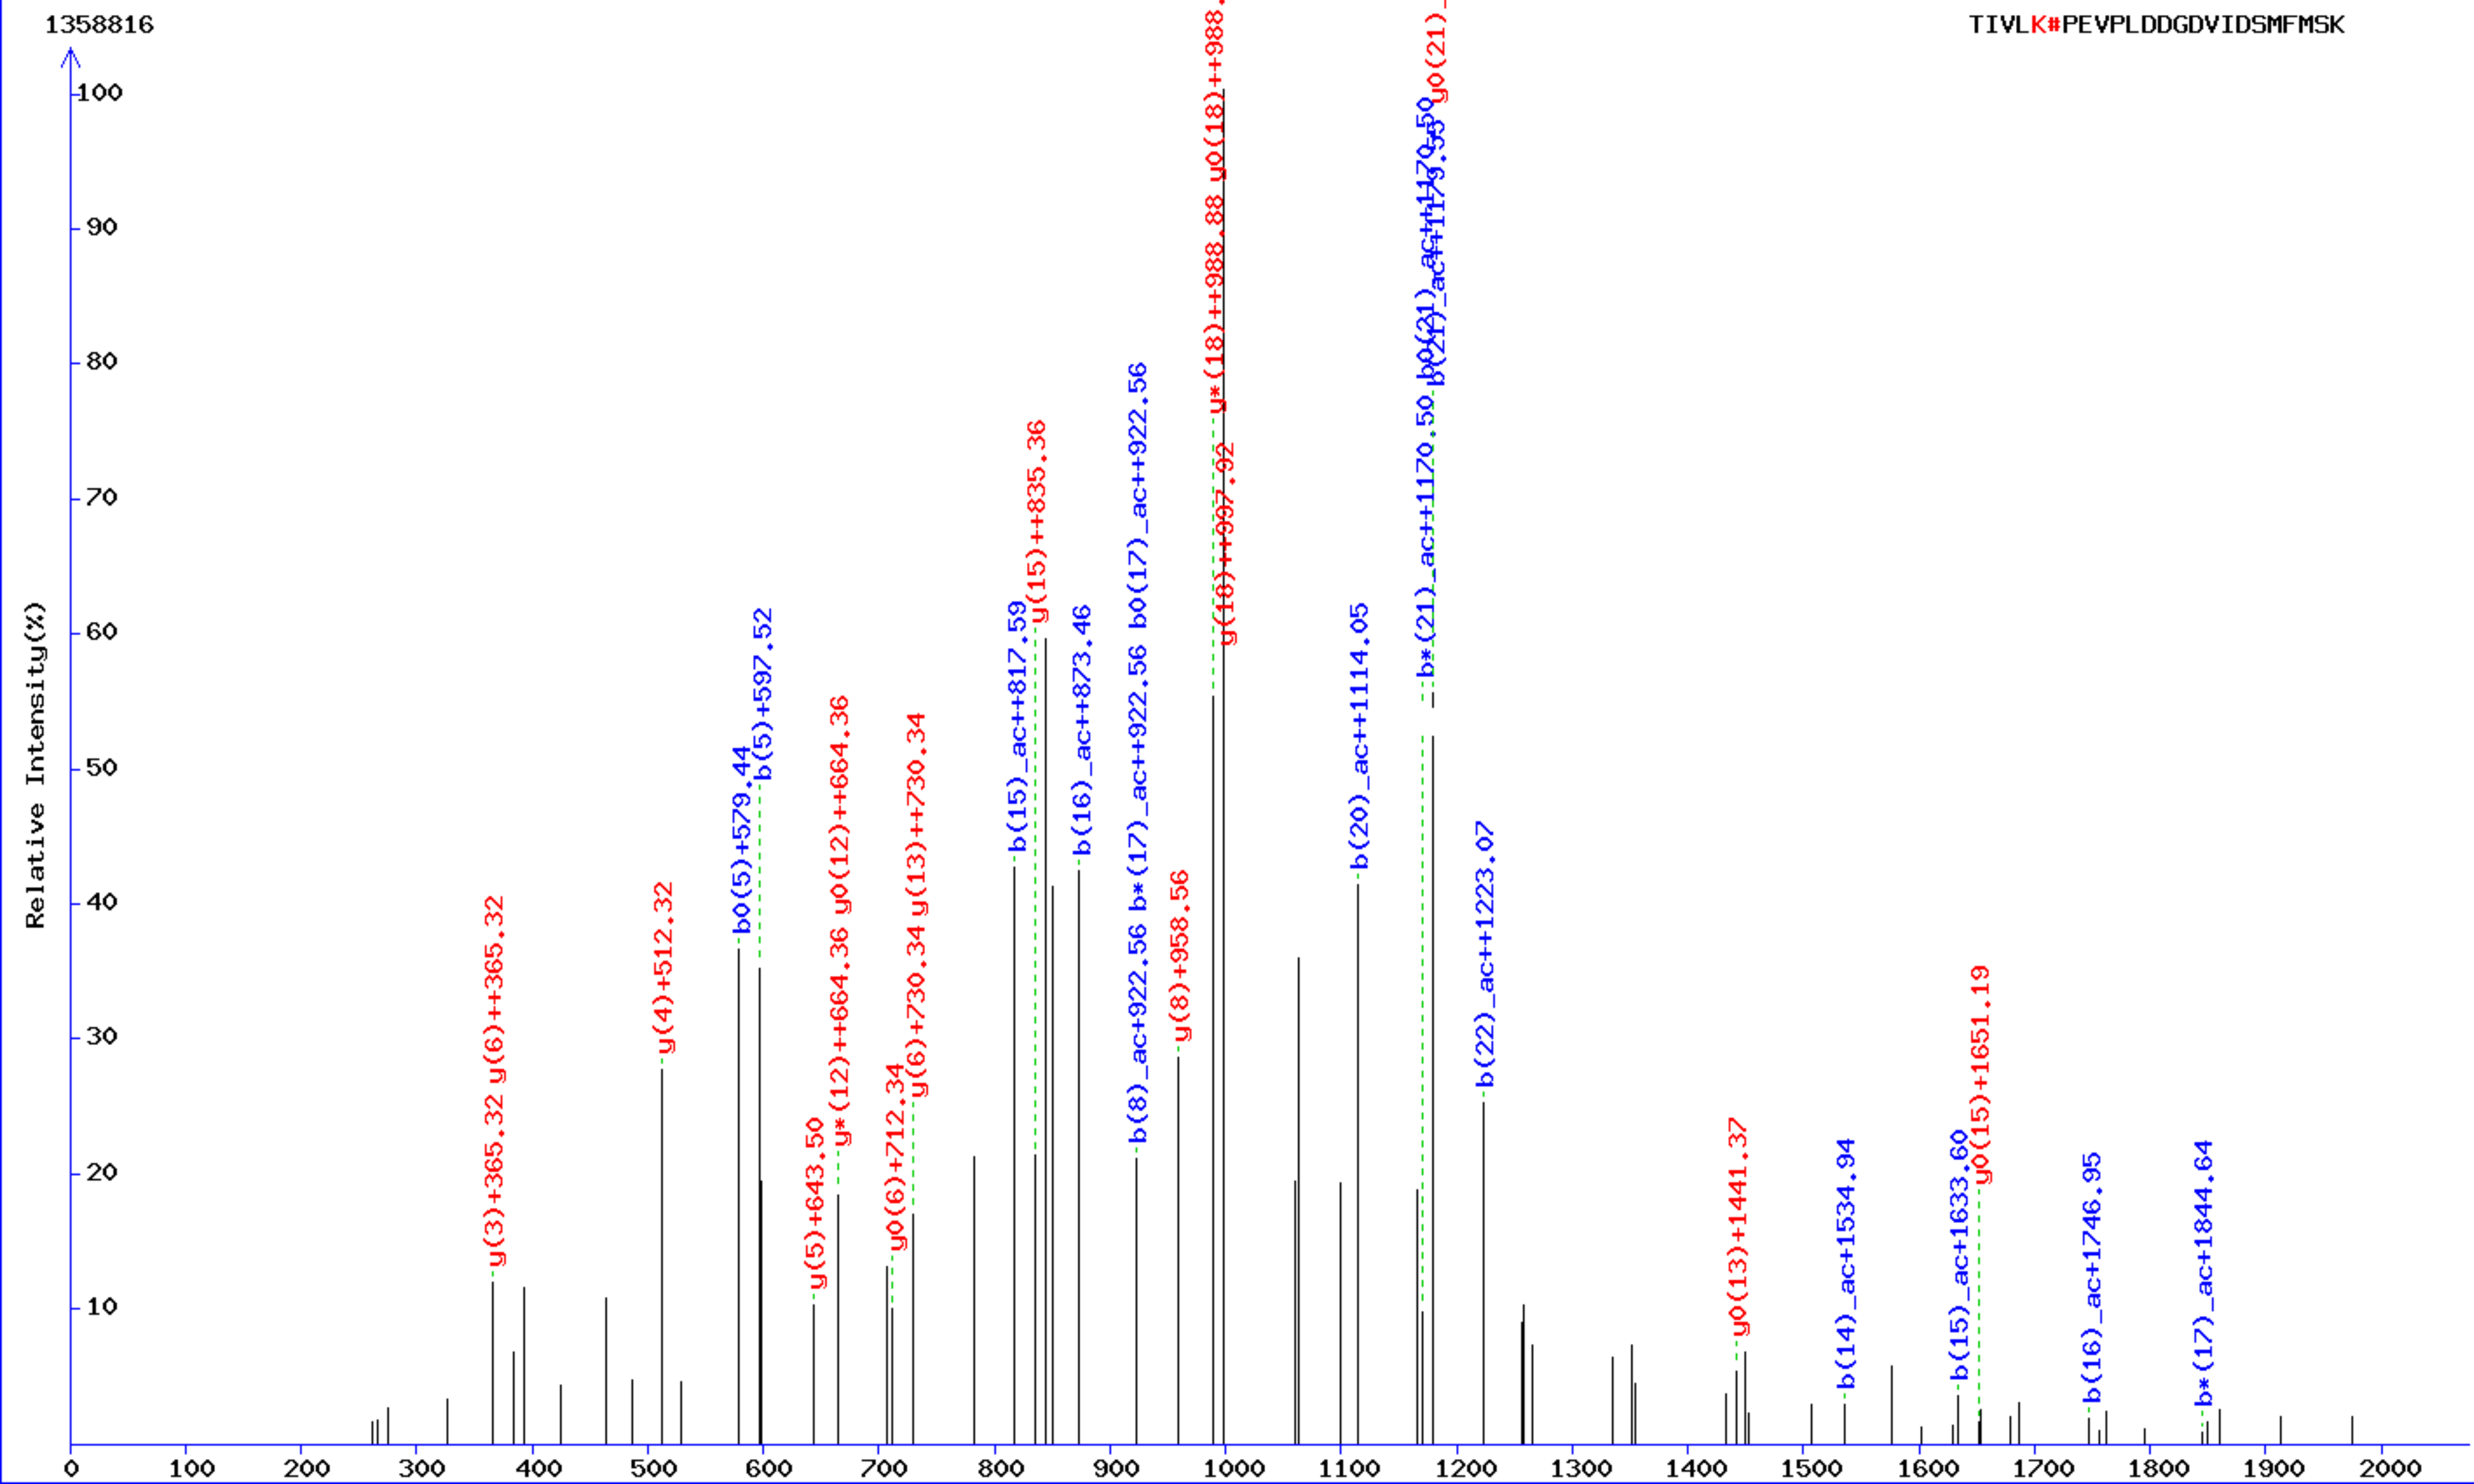

# gi|148661098 MRA\_1318 ATP synthase F0F1 subunit beta

GDFDHVPEQAFFLIGGLDDLAK#K

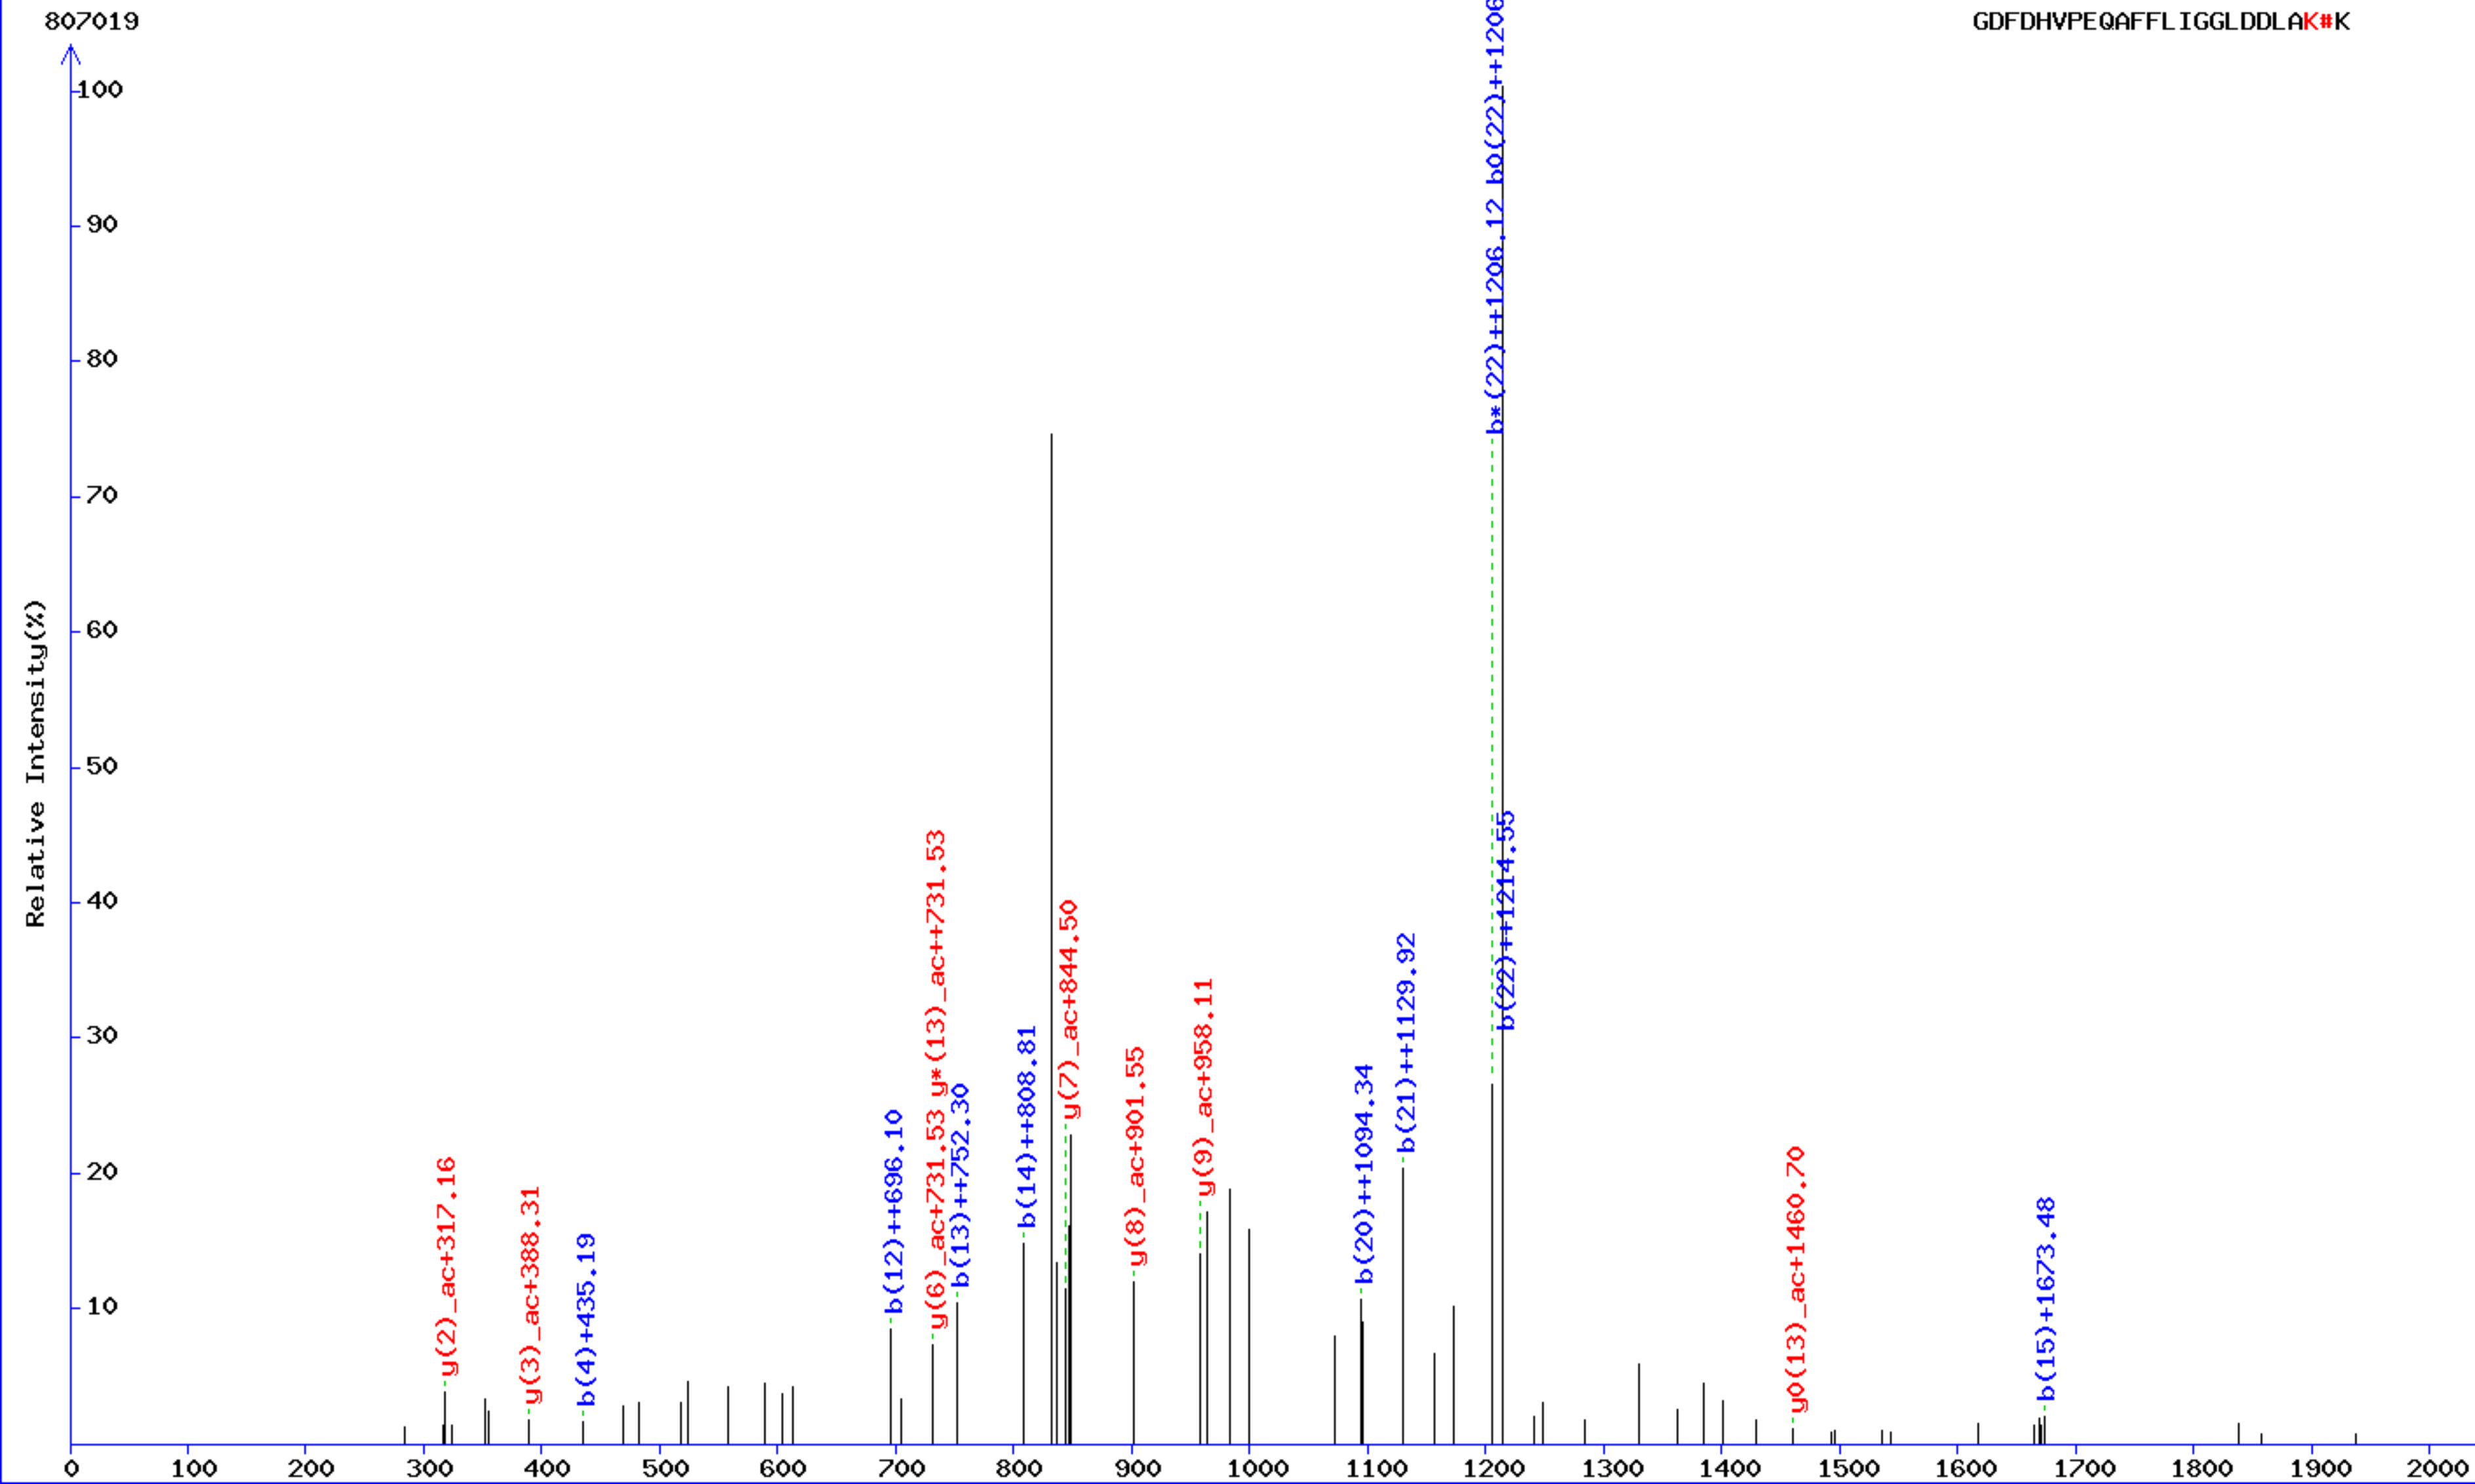

# gi|148660460 MRA\_0694 elongation factor Tu

ETDK#PFLMPVEDVFTITGR

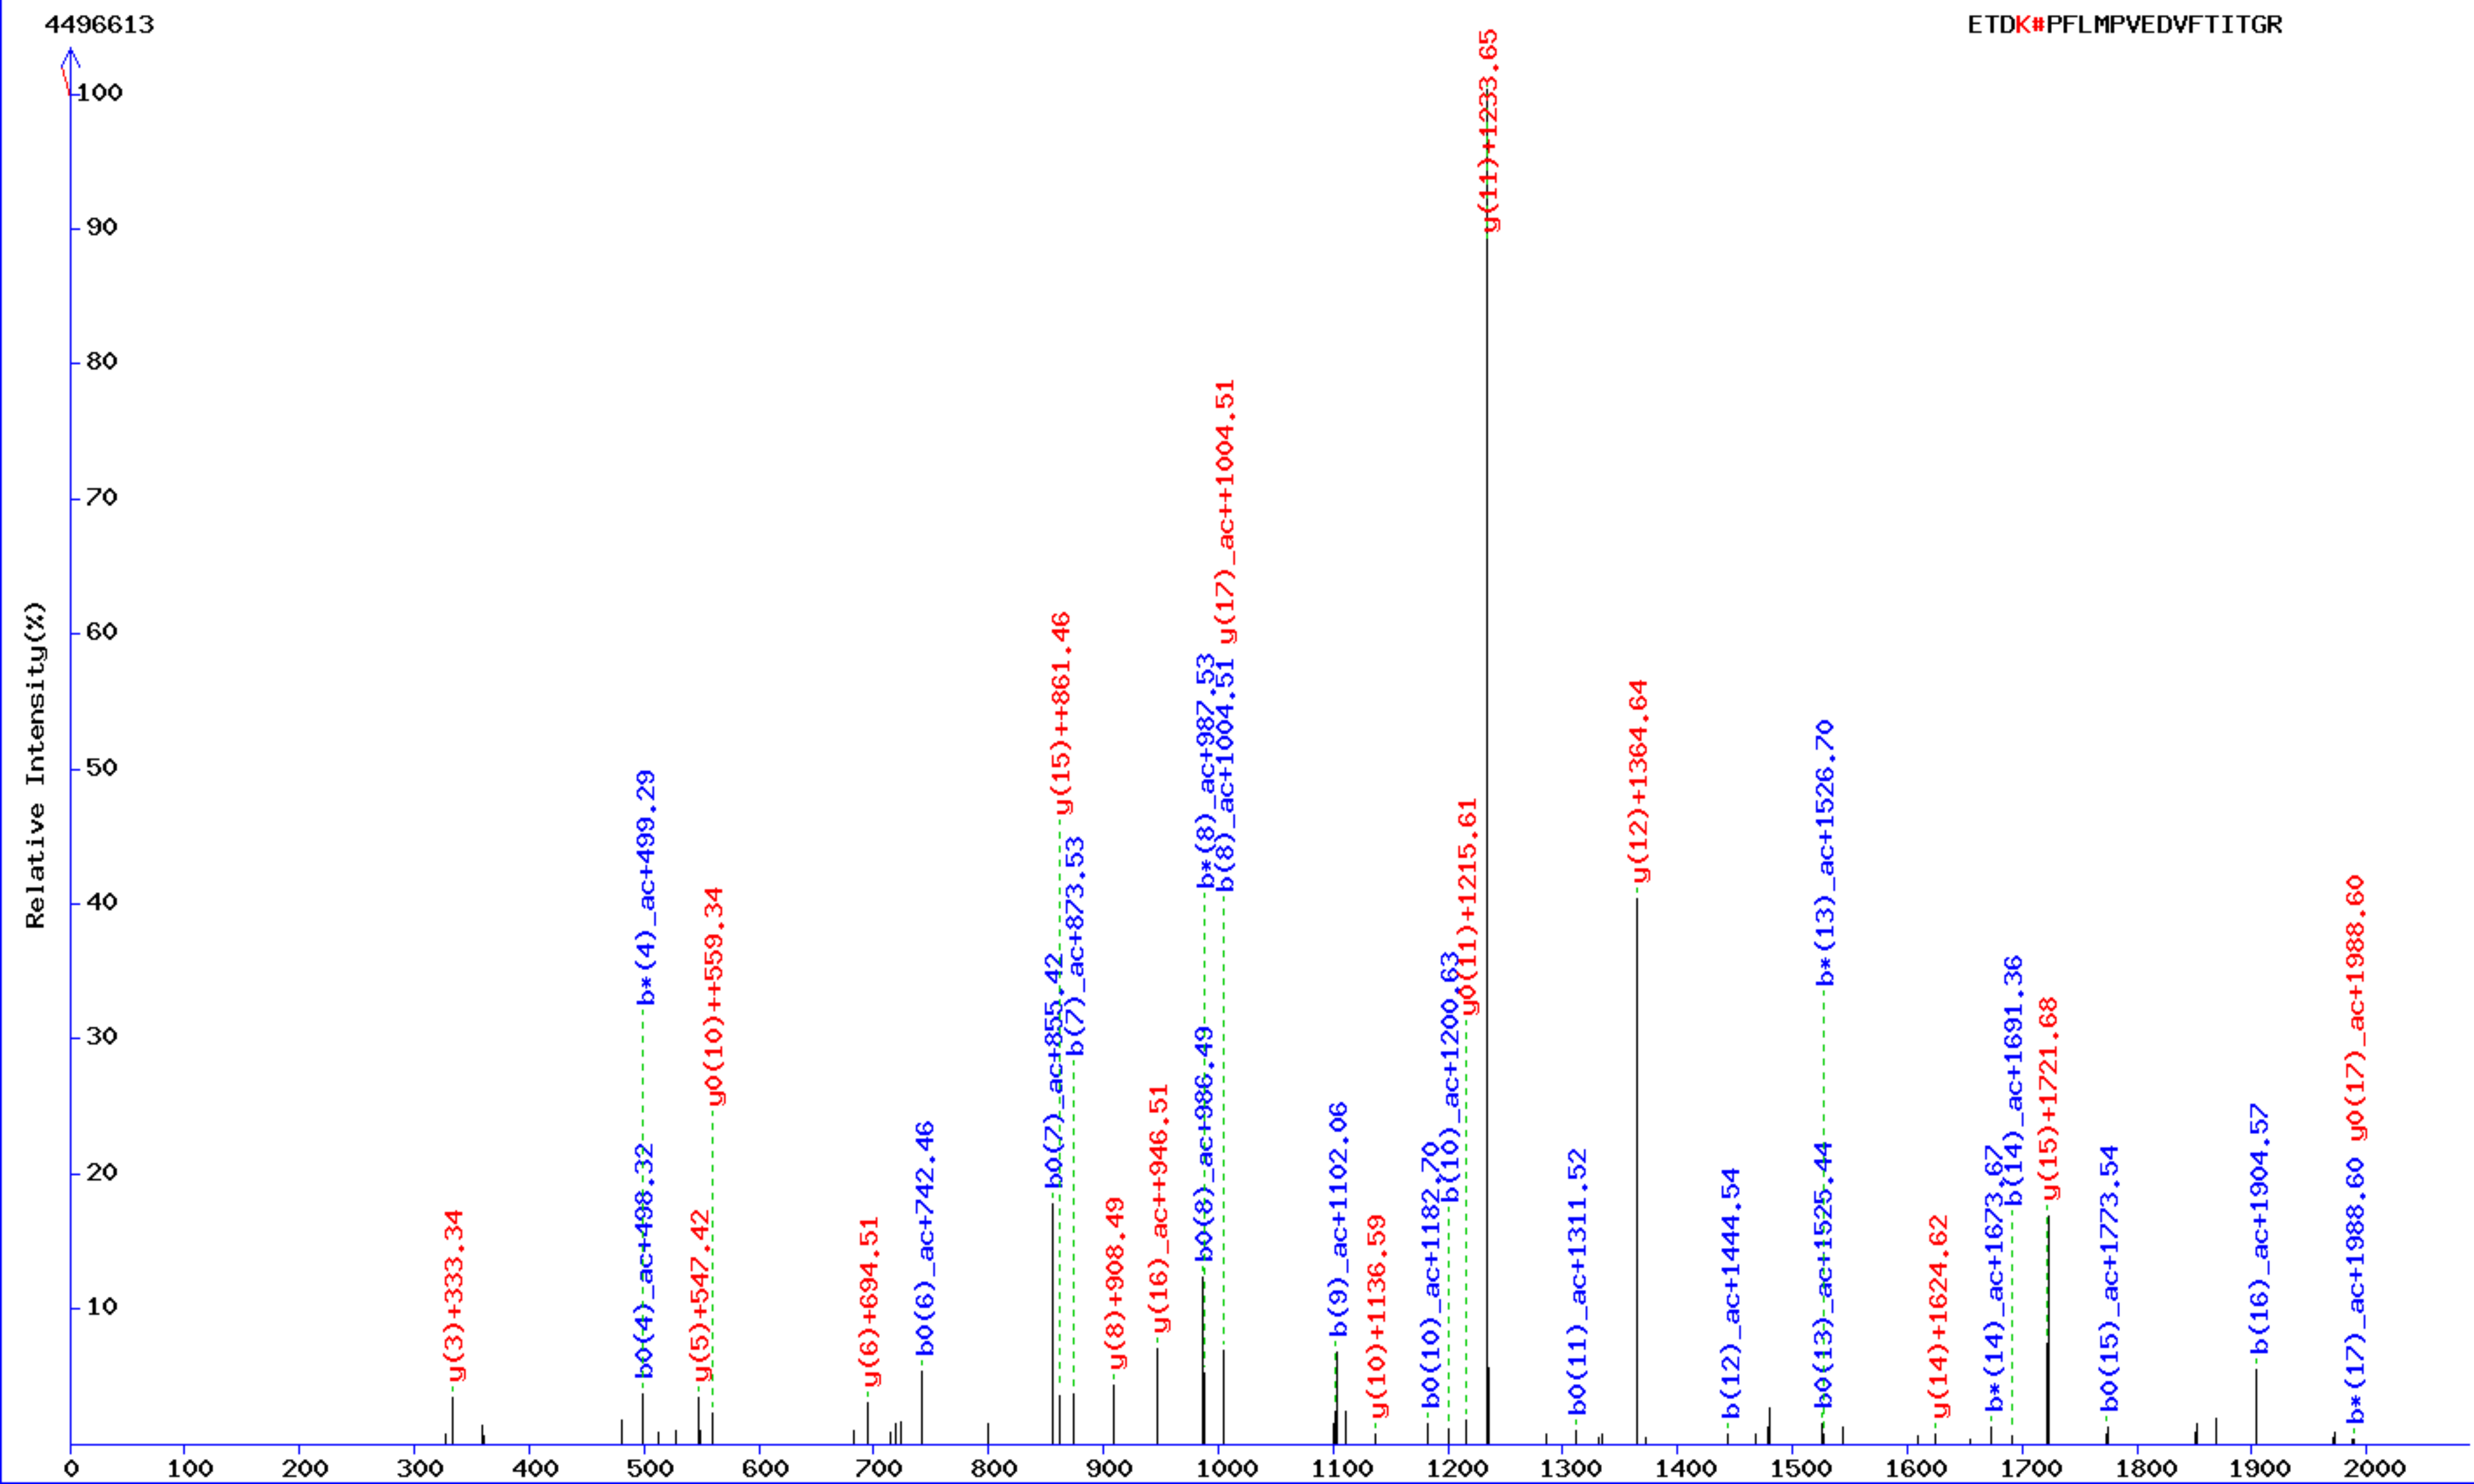

# gi|148660879 MRA\_1104 serine hydroxymethyltransferase

SAPLAEVDPDIAELLAK#ELGR

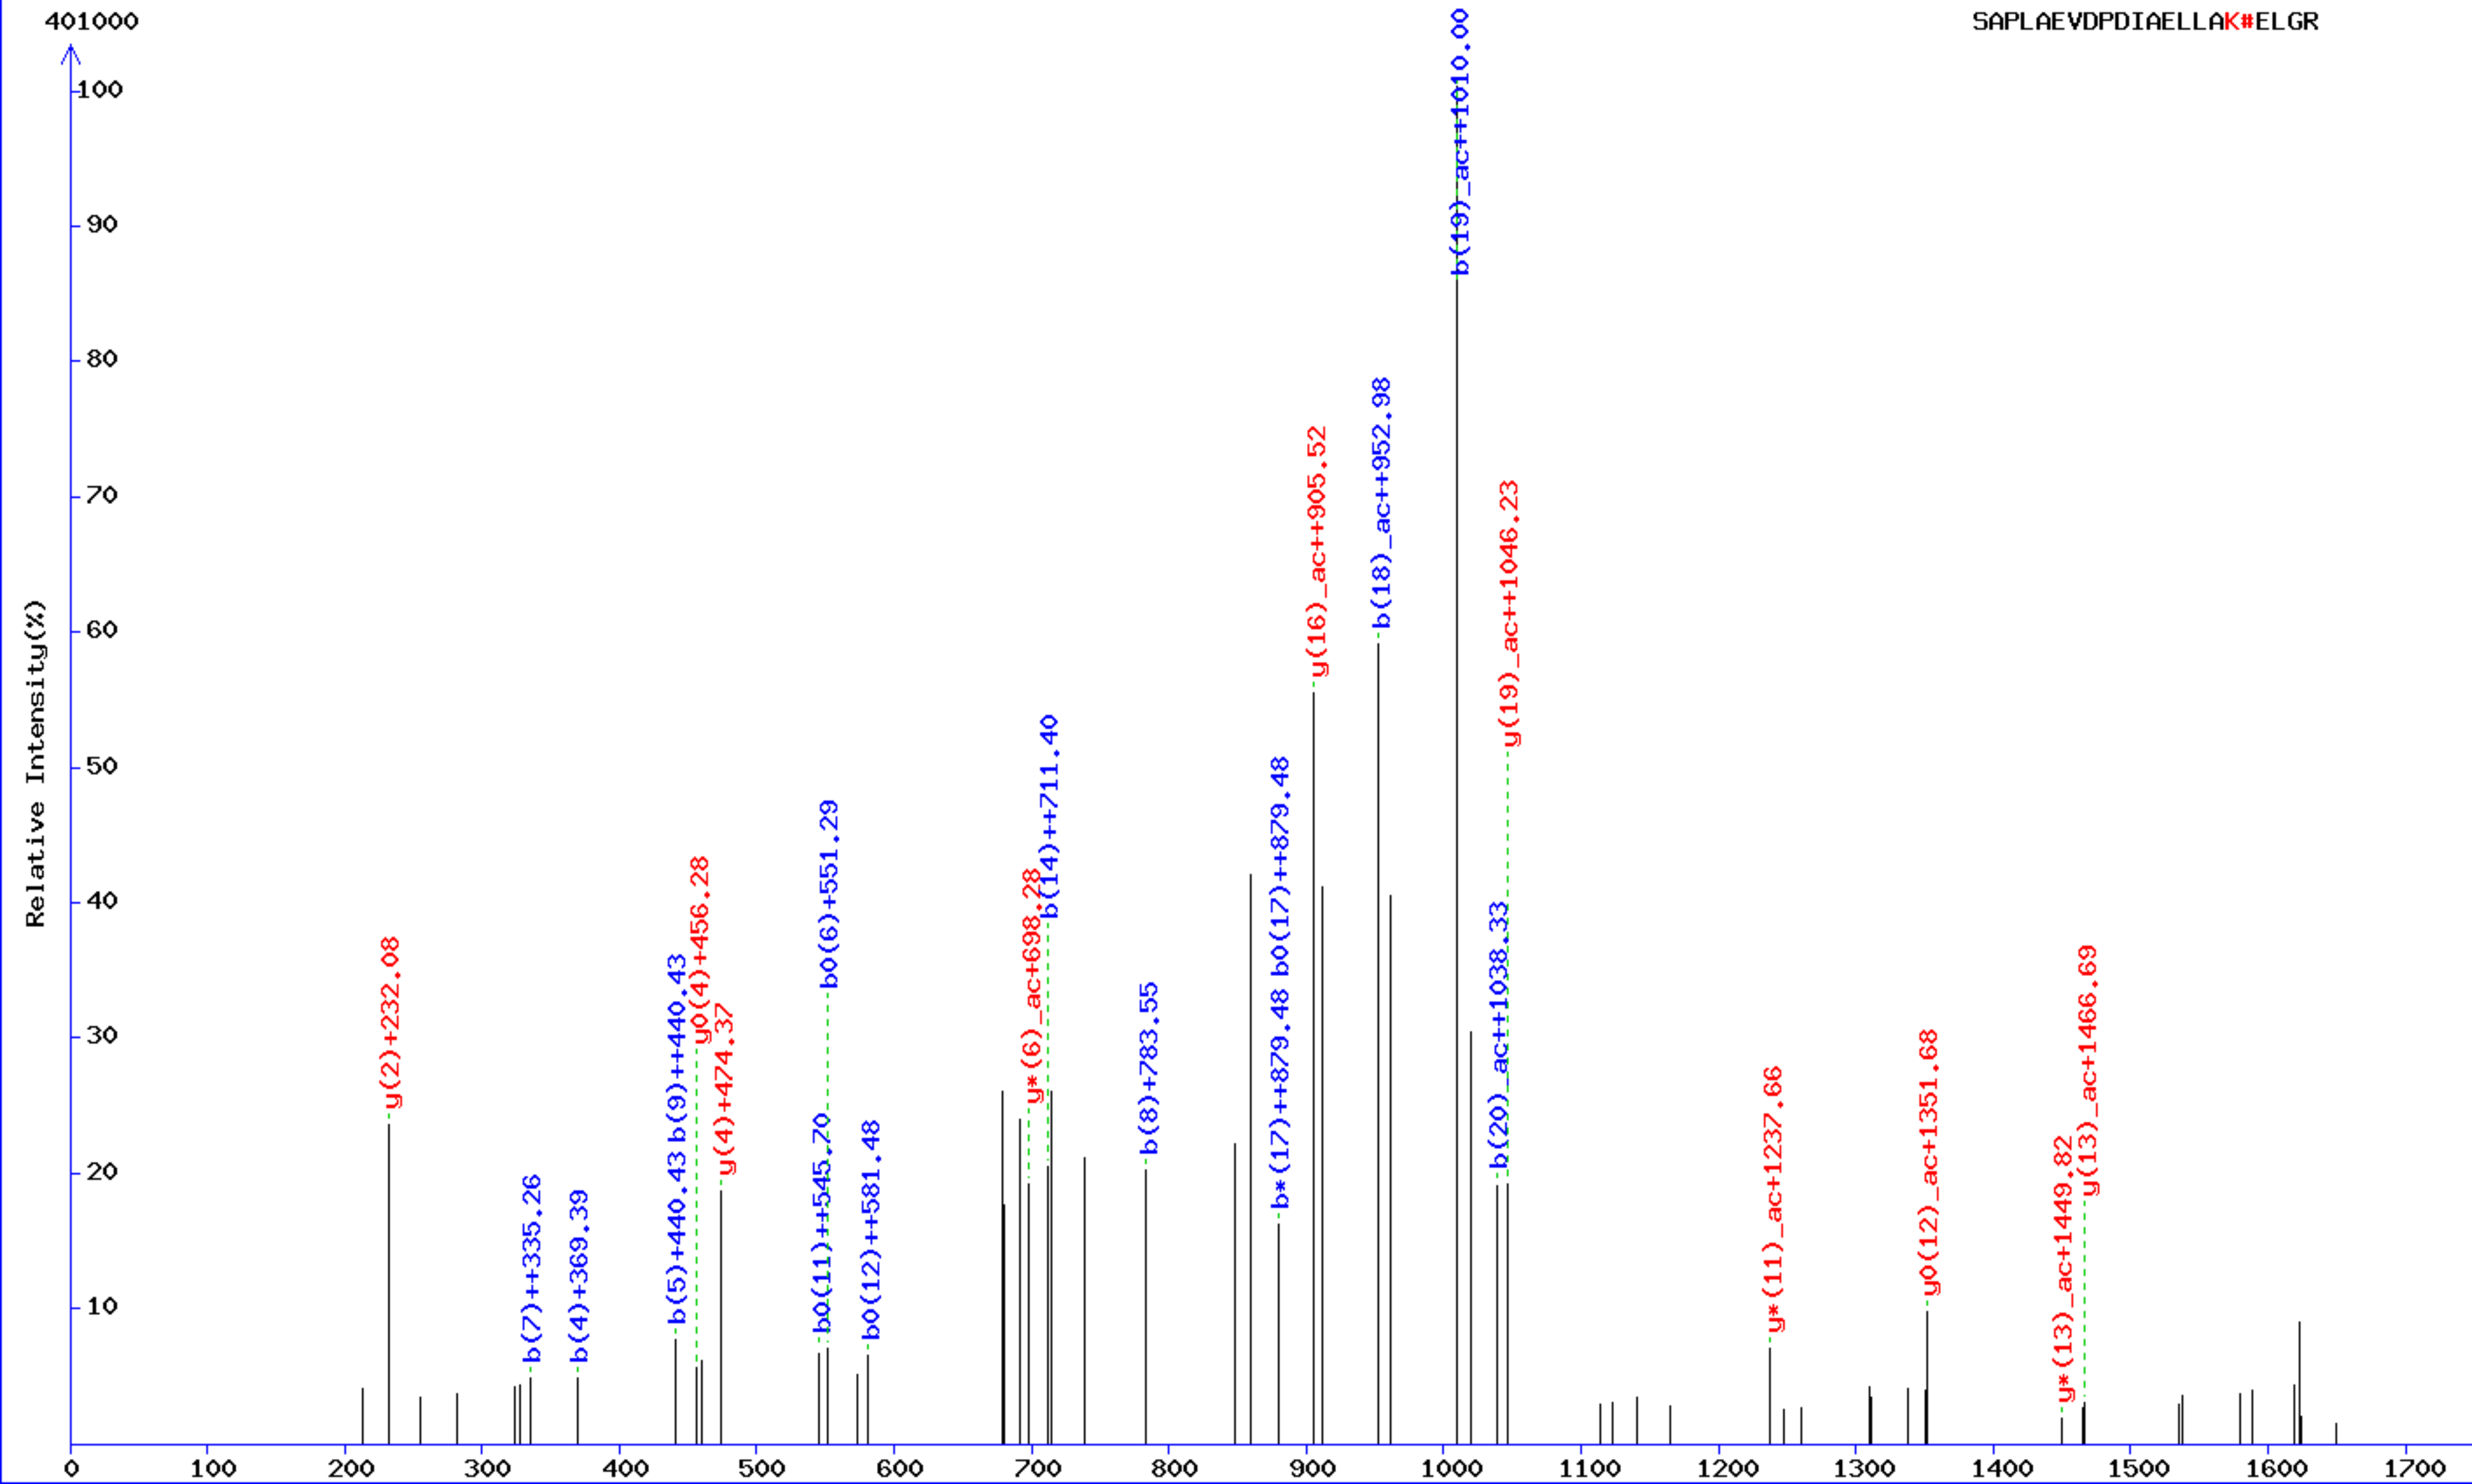

# gi|148661035 MRA\_1256 alpha-ketoglutarate decarboxylase

IVINNQLK#R

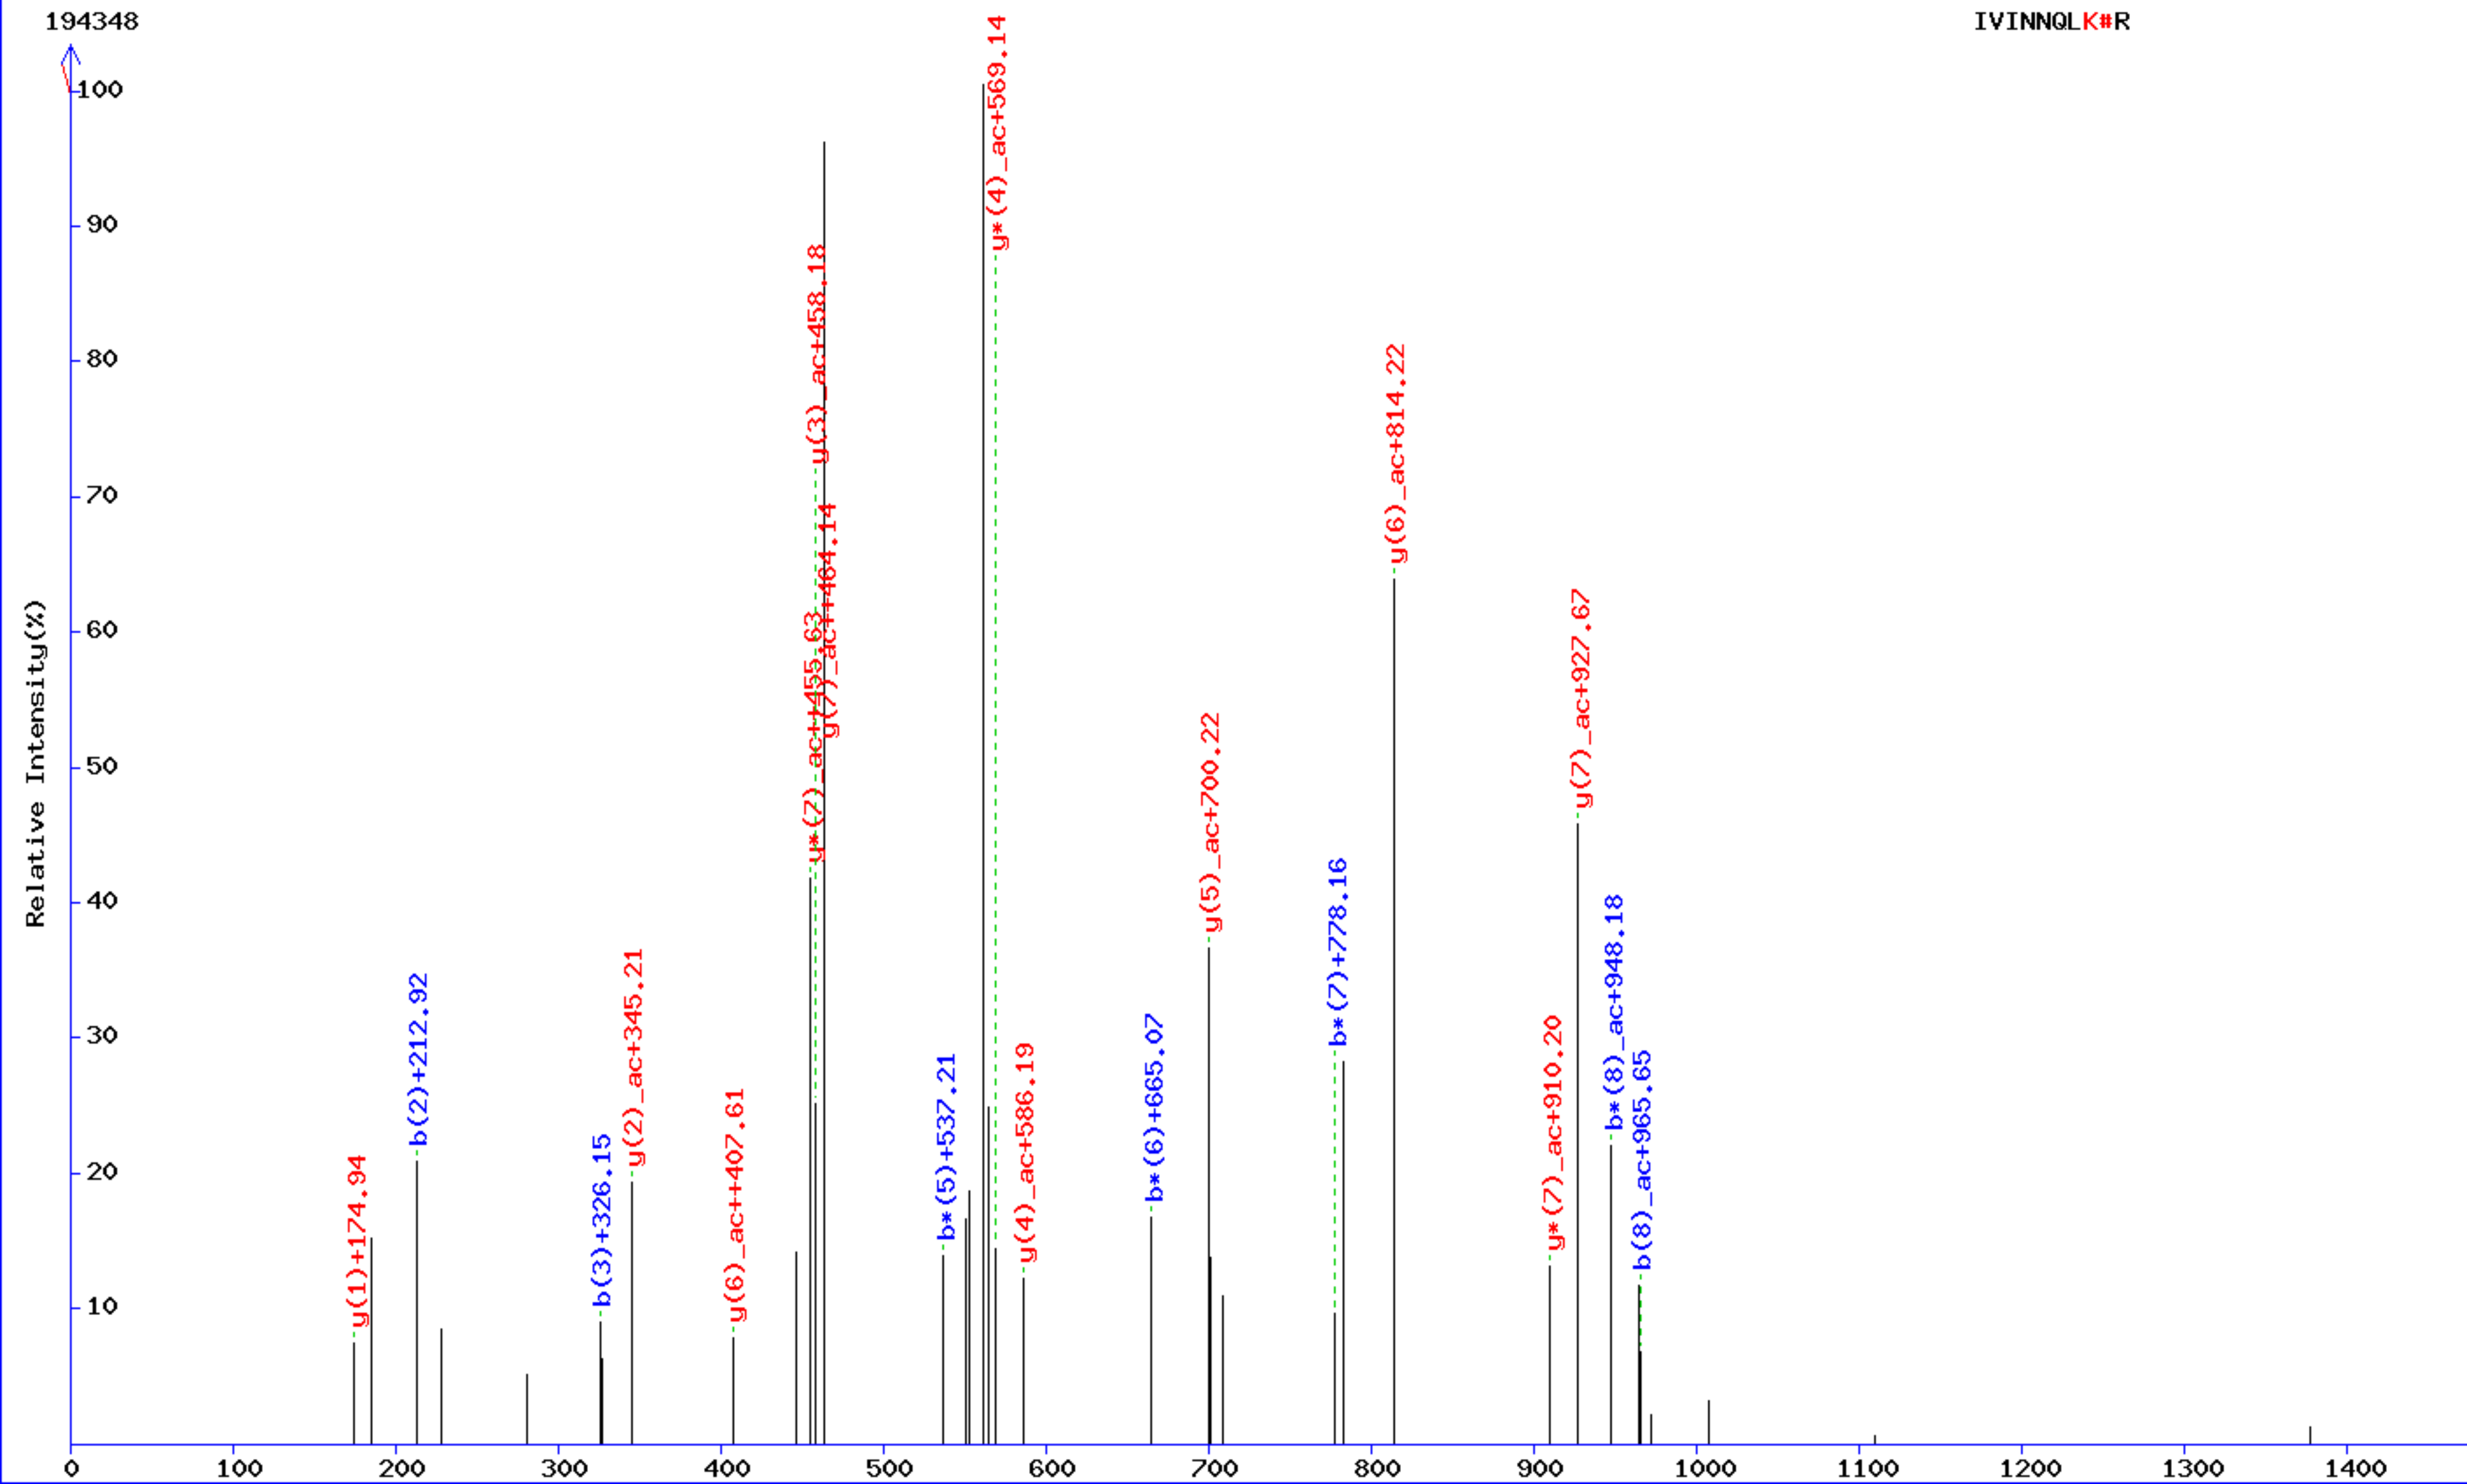

# gi|148660637 MRA\_0868 fatty oxidation complex subunit alpha

GAGFYEYADGK#R

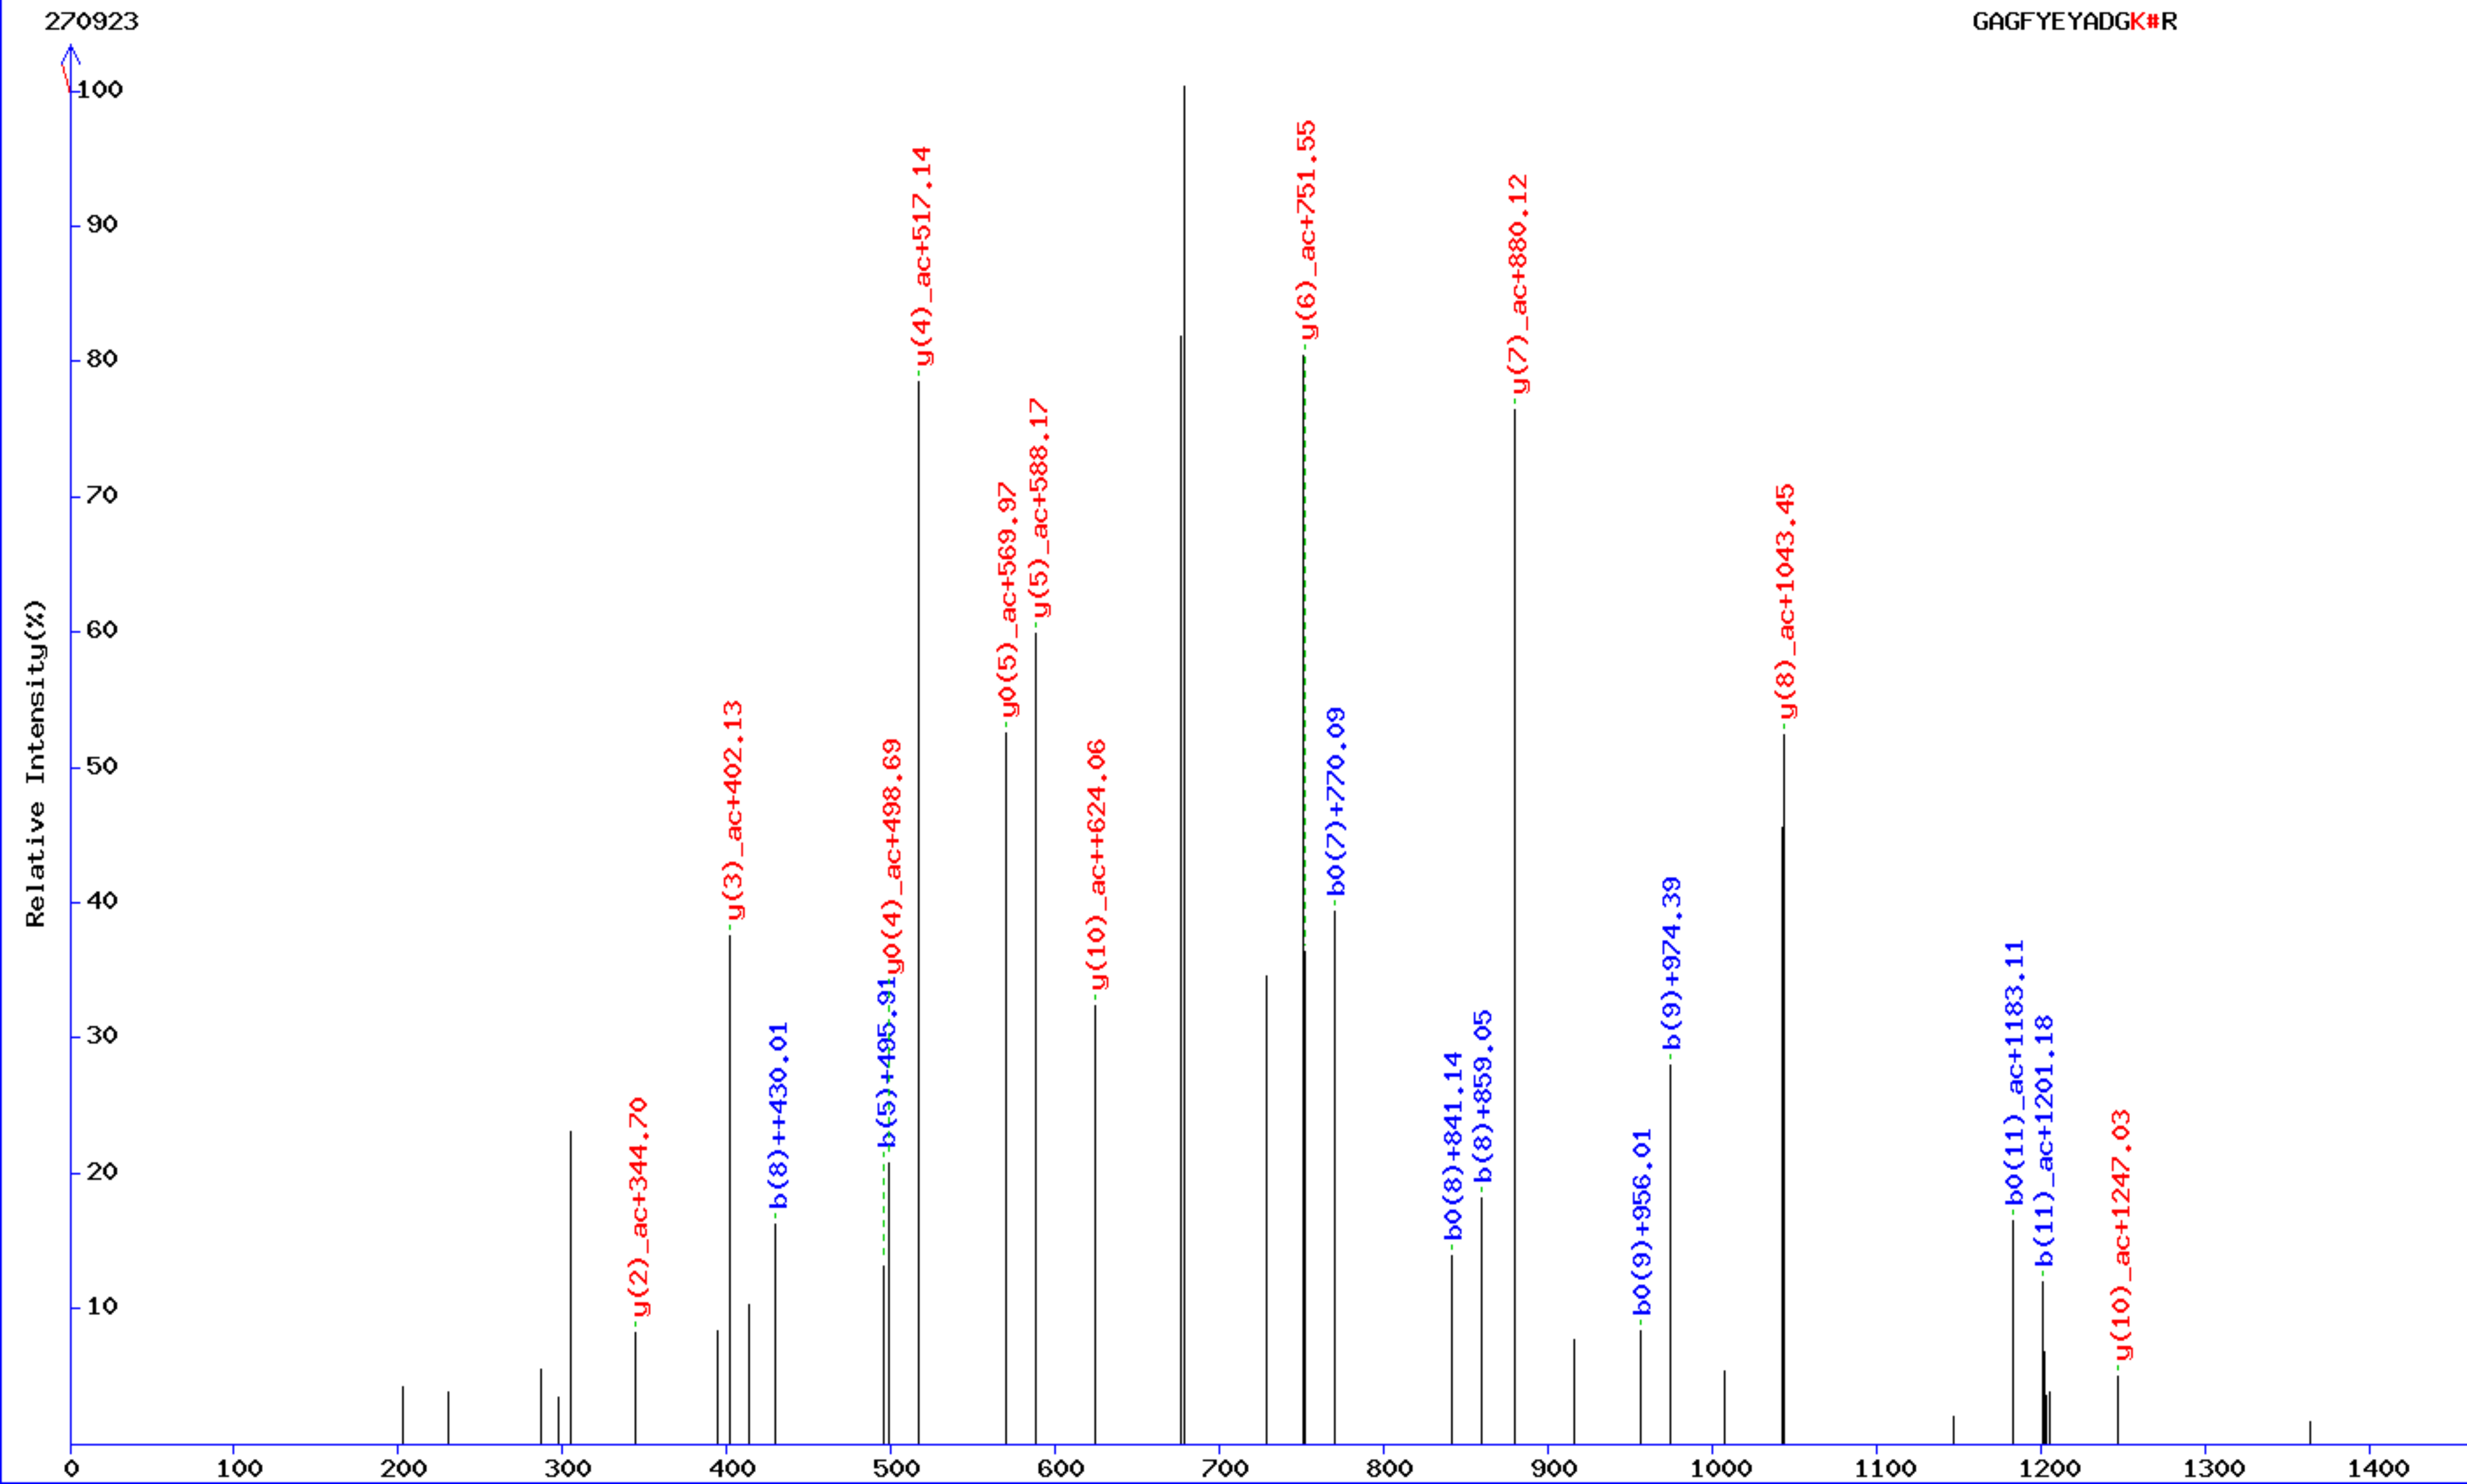

# gi|148660441 MRA\_0676 DNA-directed RNA polymerase subunit beta

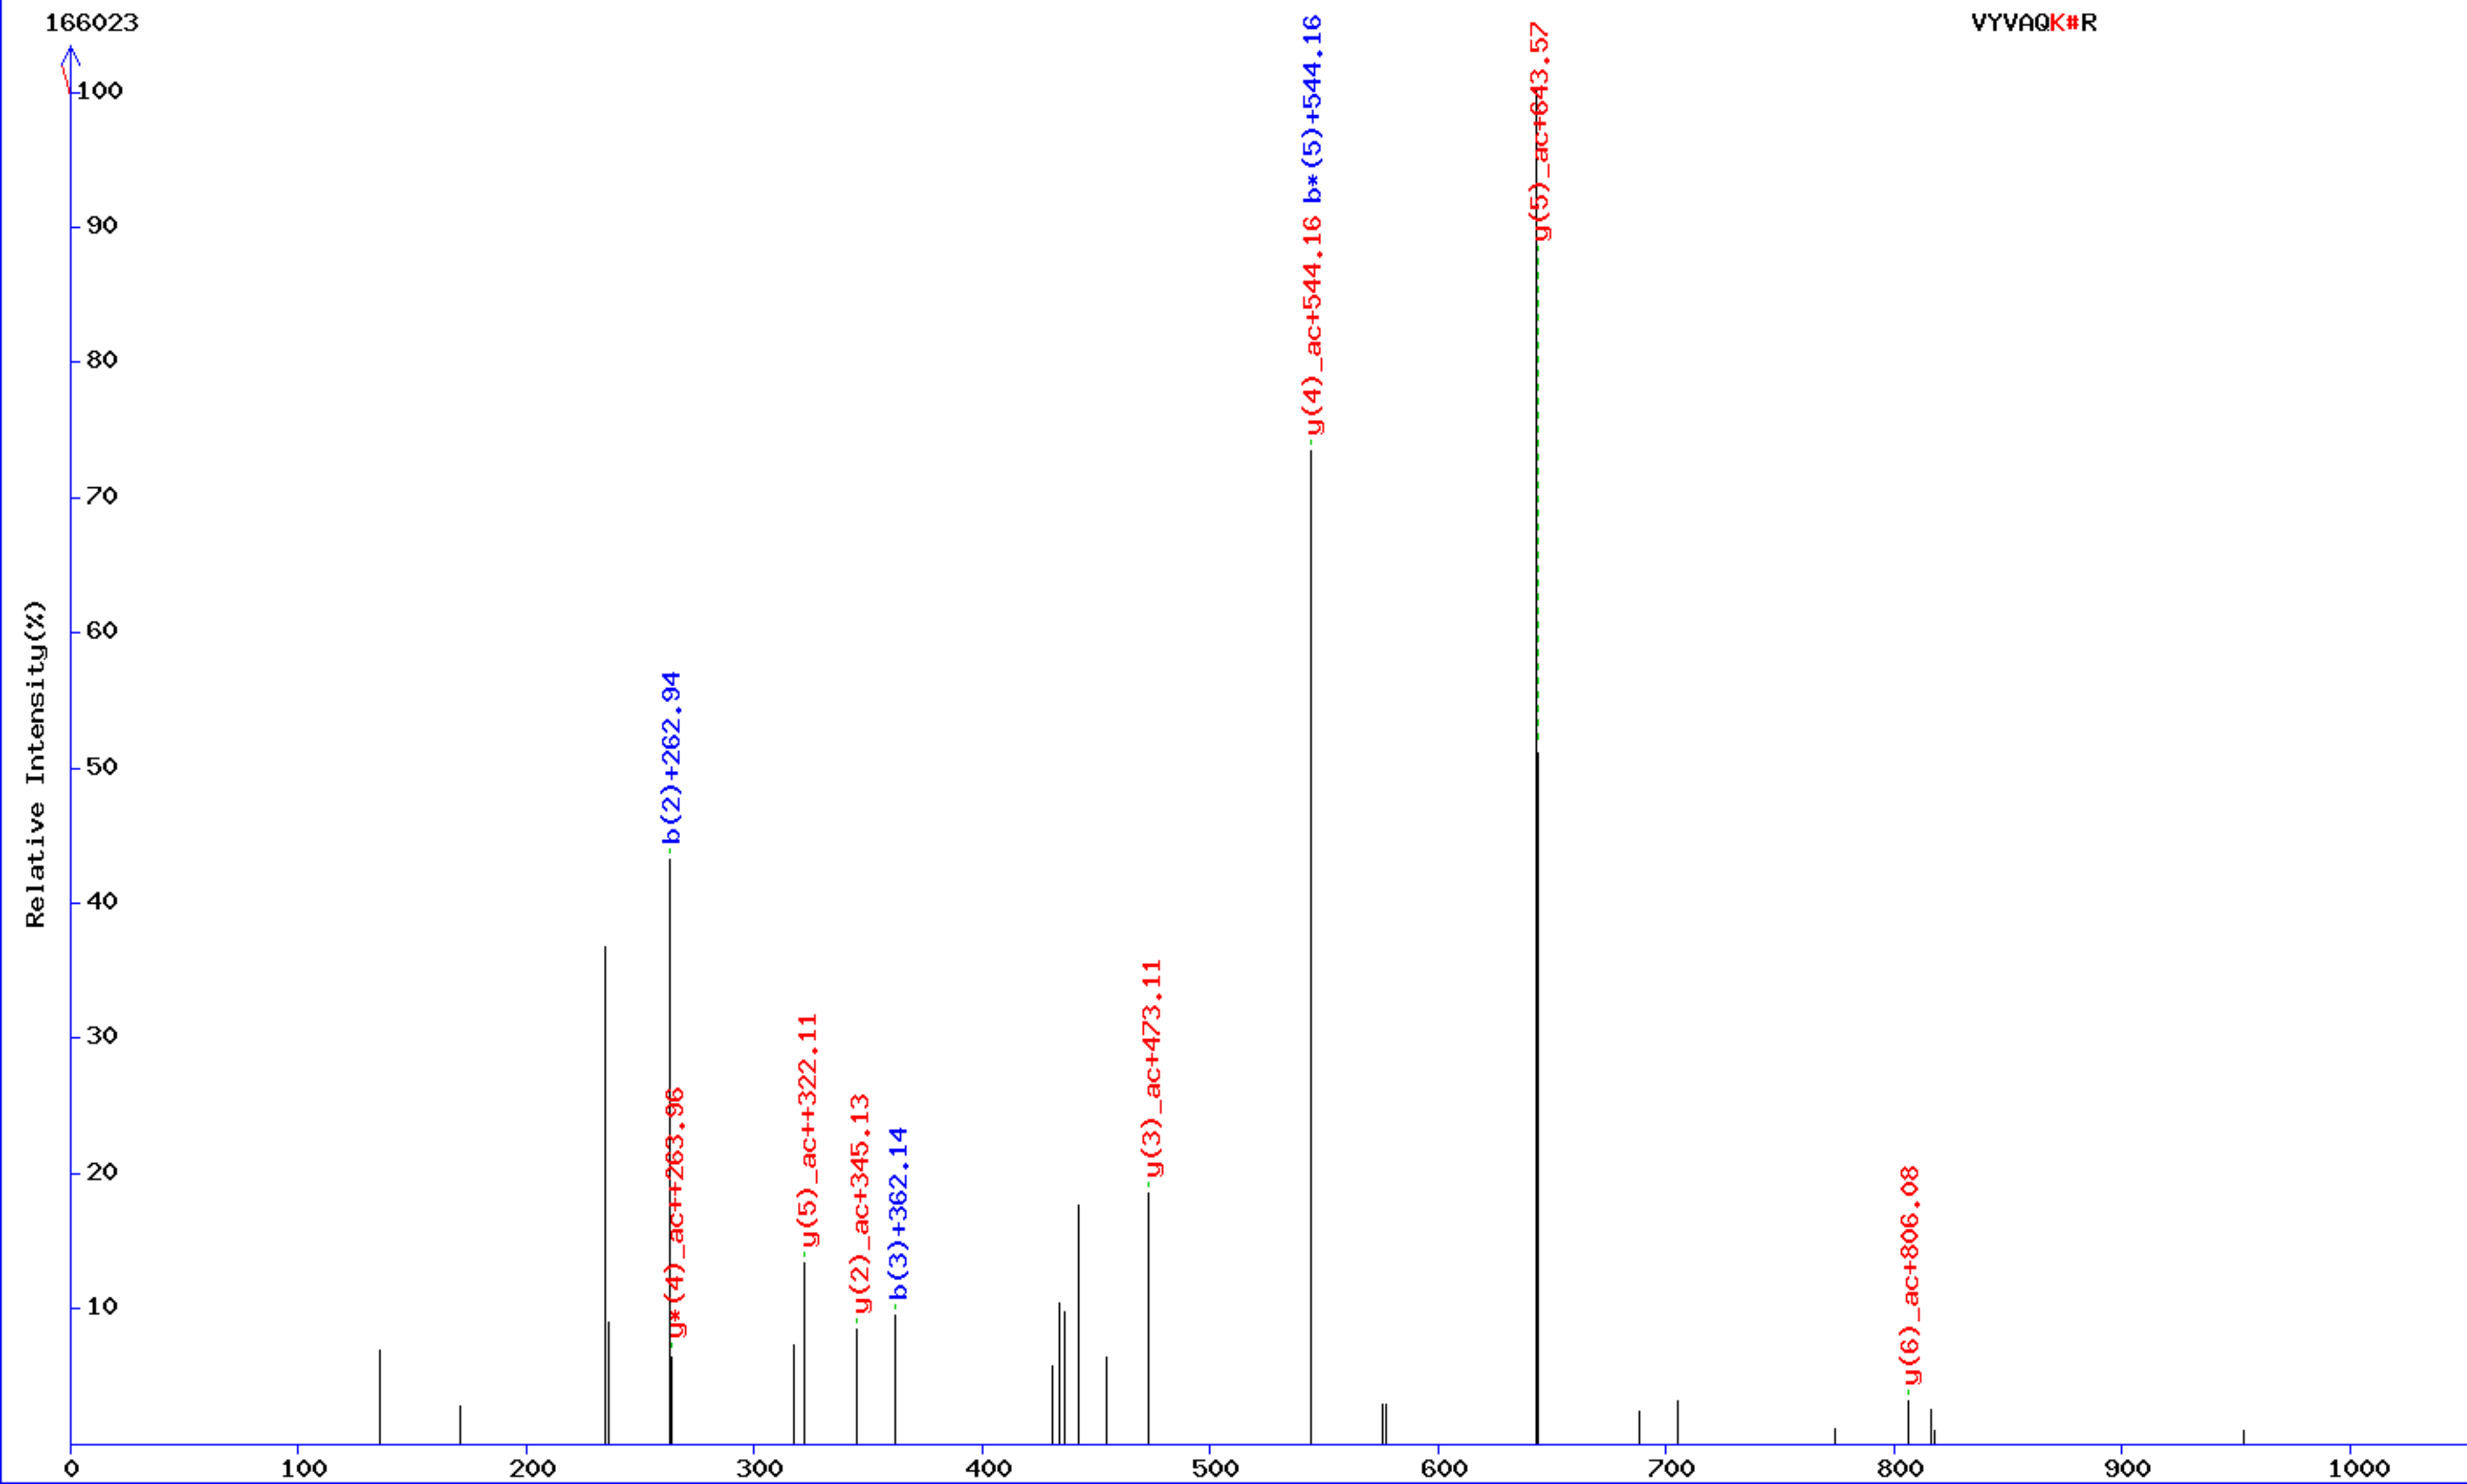



# gi|148662311 MRA\_2501 NAD-dependent glutamate dehydrogenase Gdh

LLPK#VLADVQR

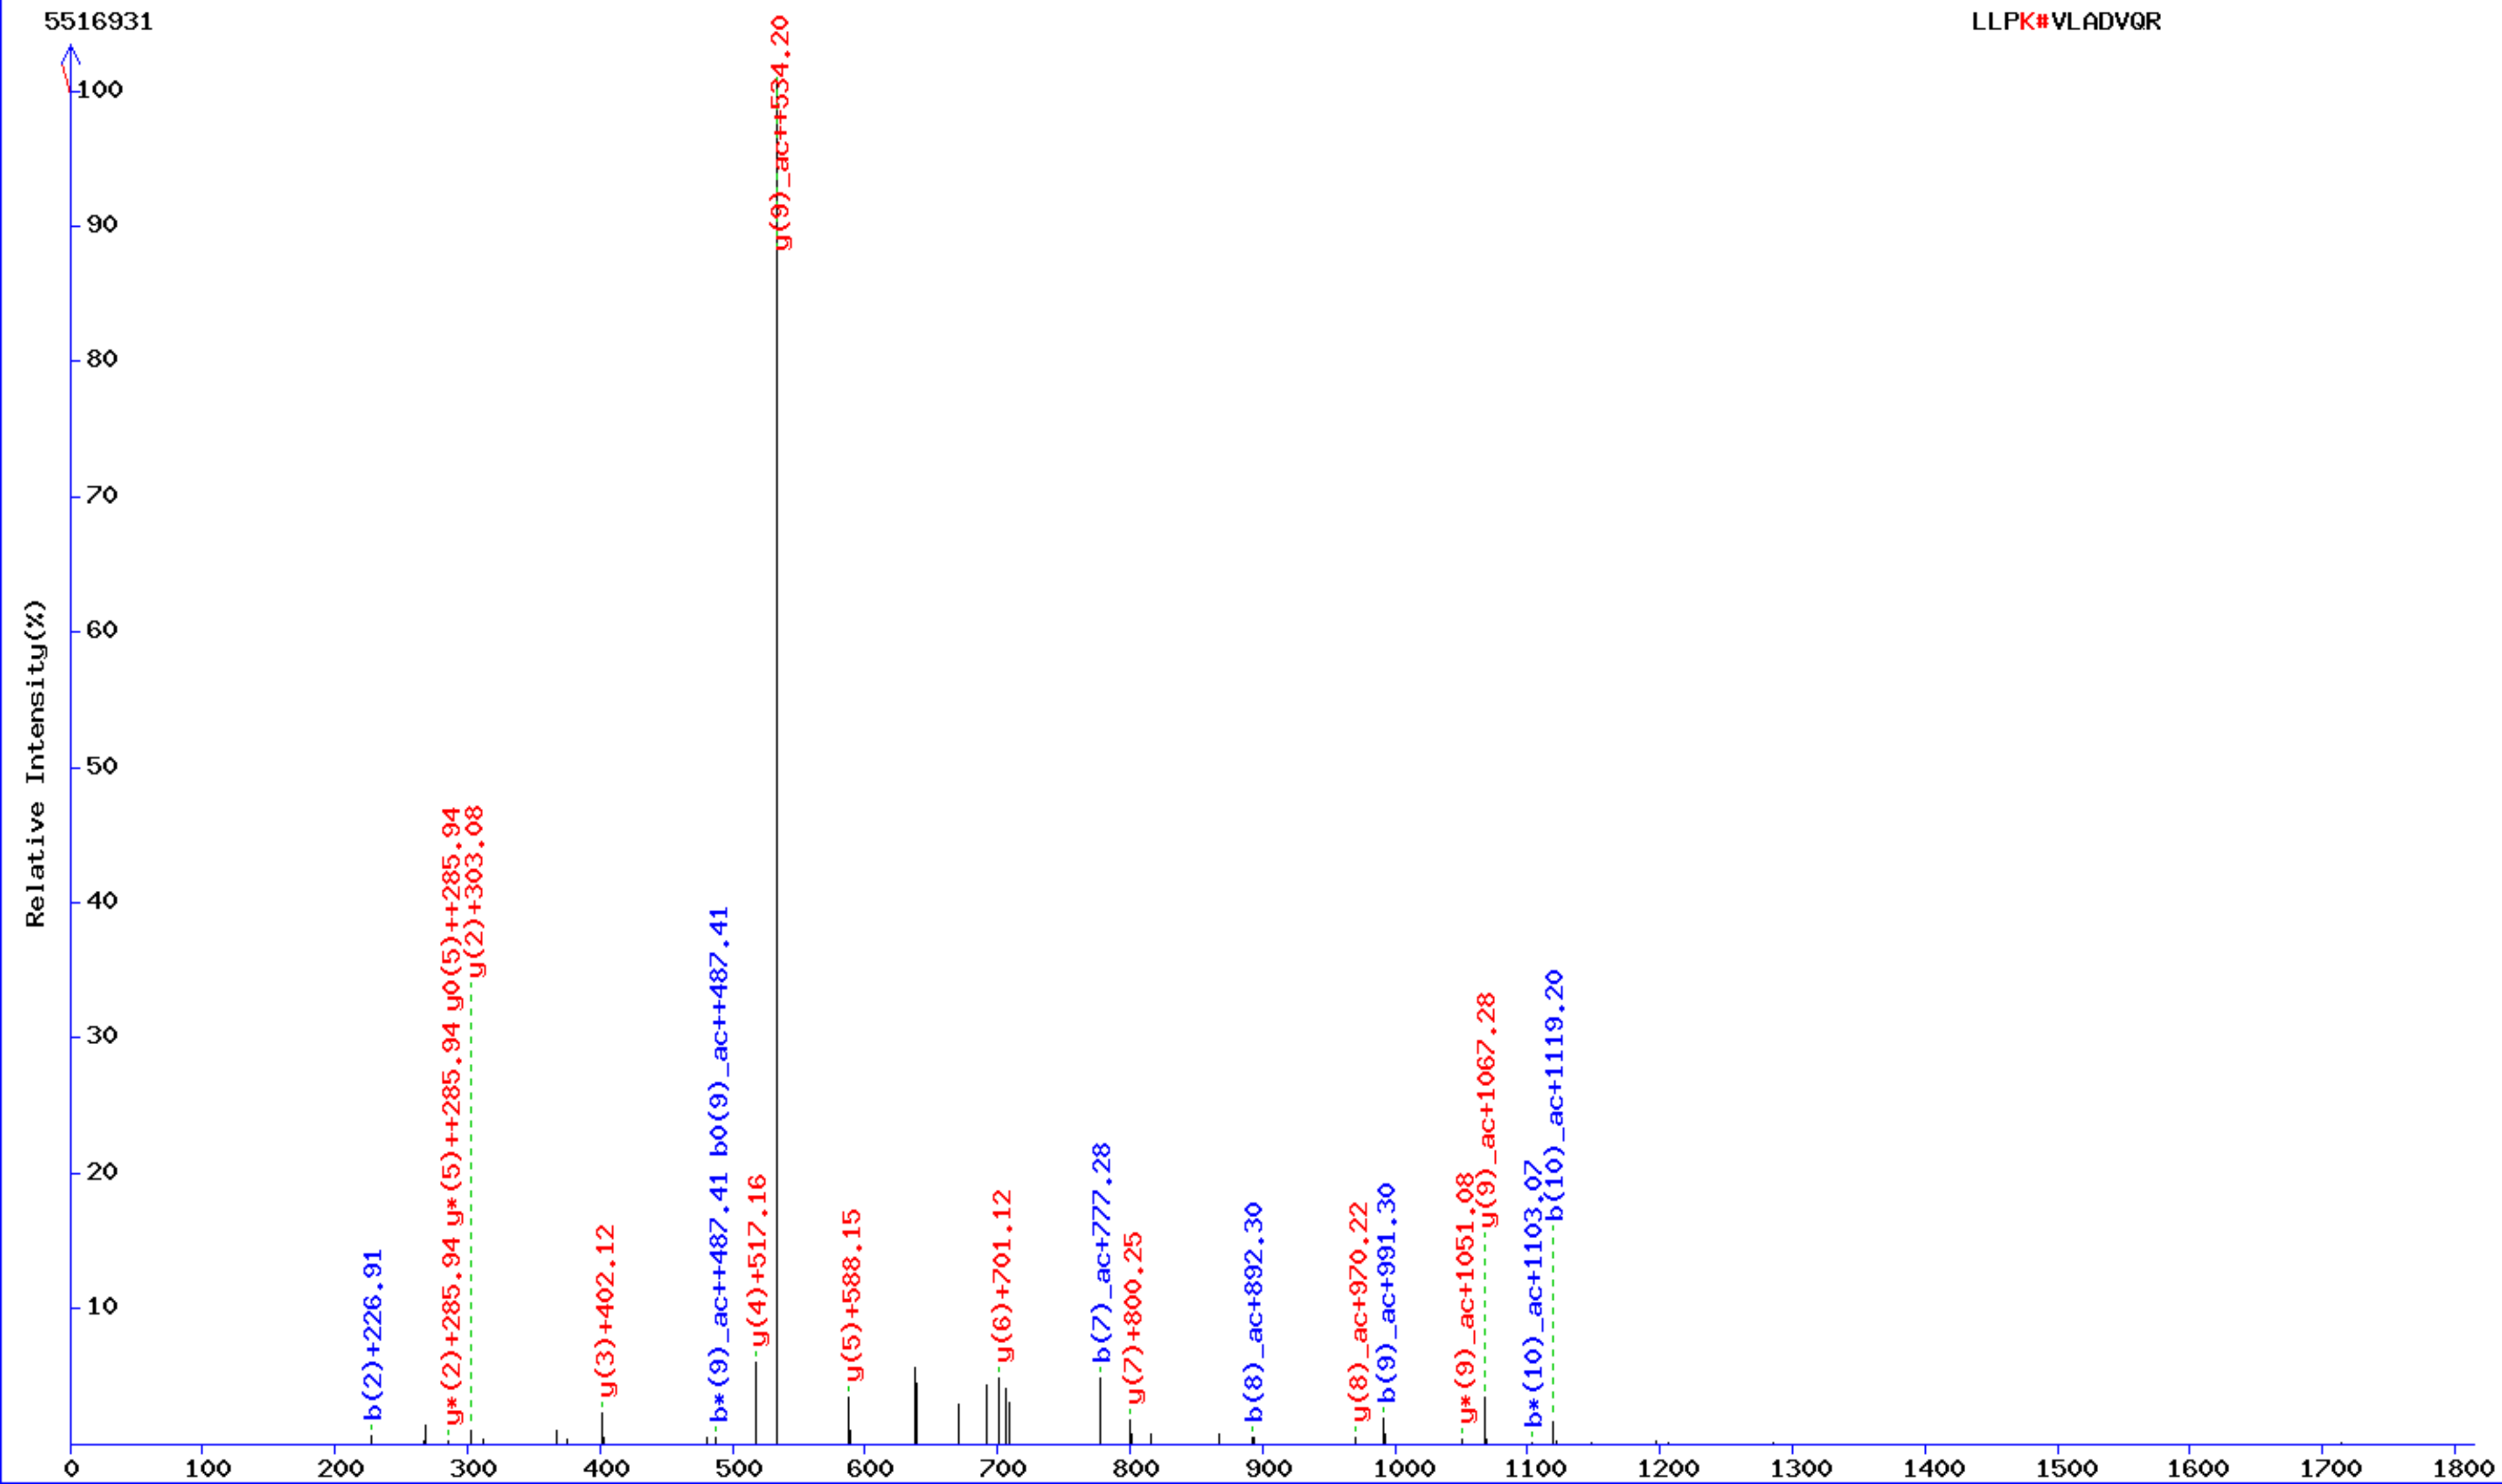

# gi|148660442 MRA\_0677 DNA-directed RNA polymerase subunit beta'

MGHIELAAPVTHIWYFK#GVPSR

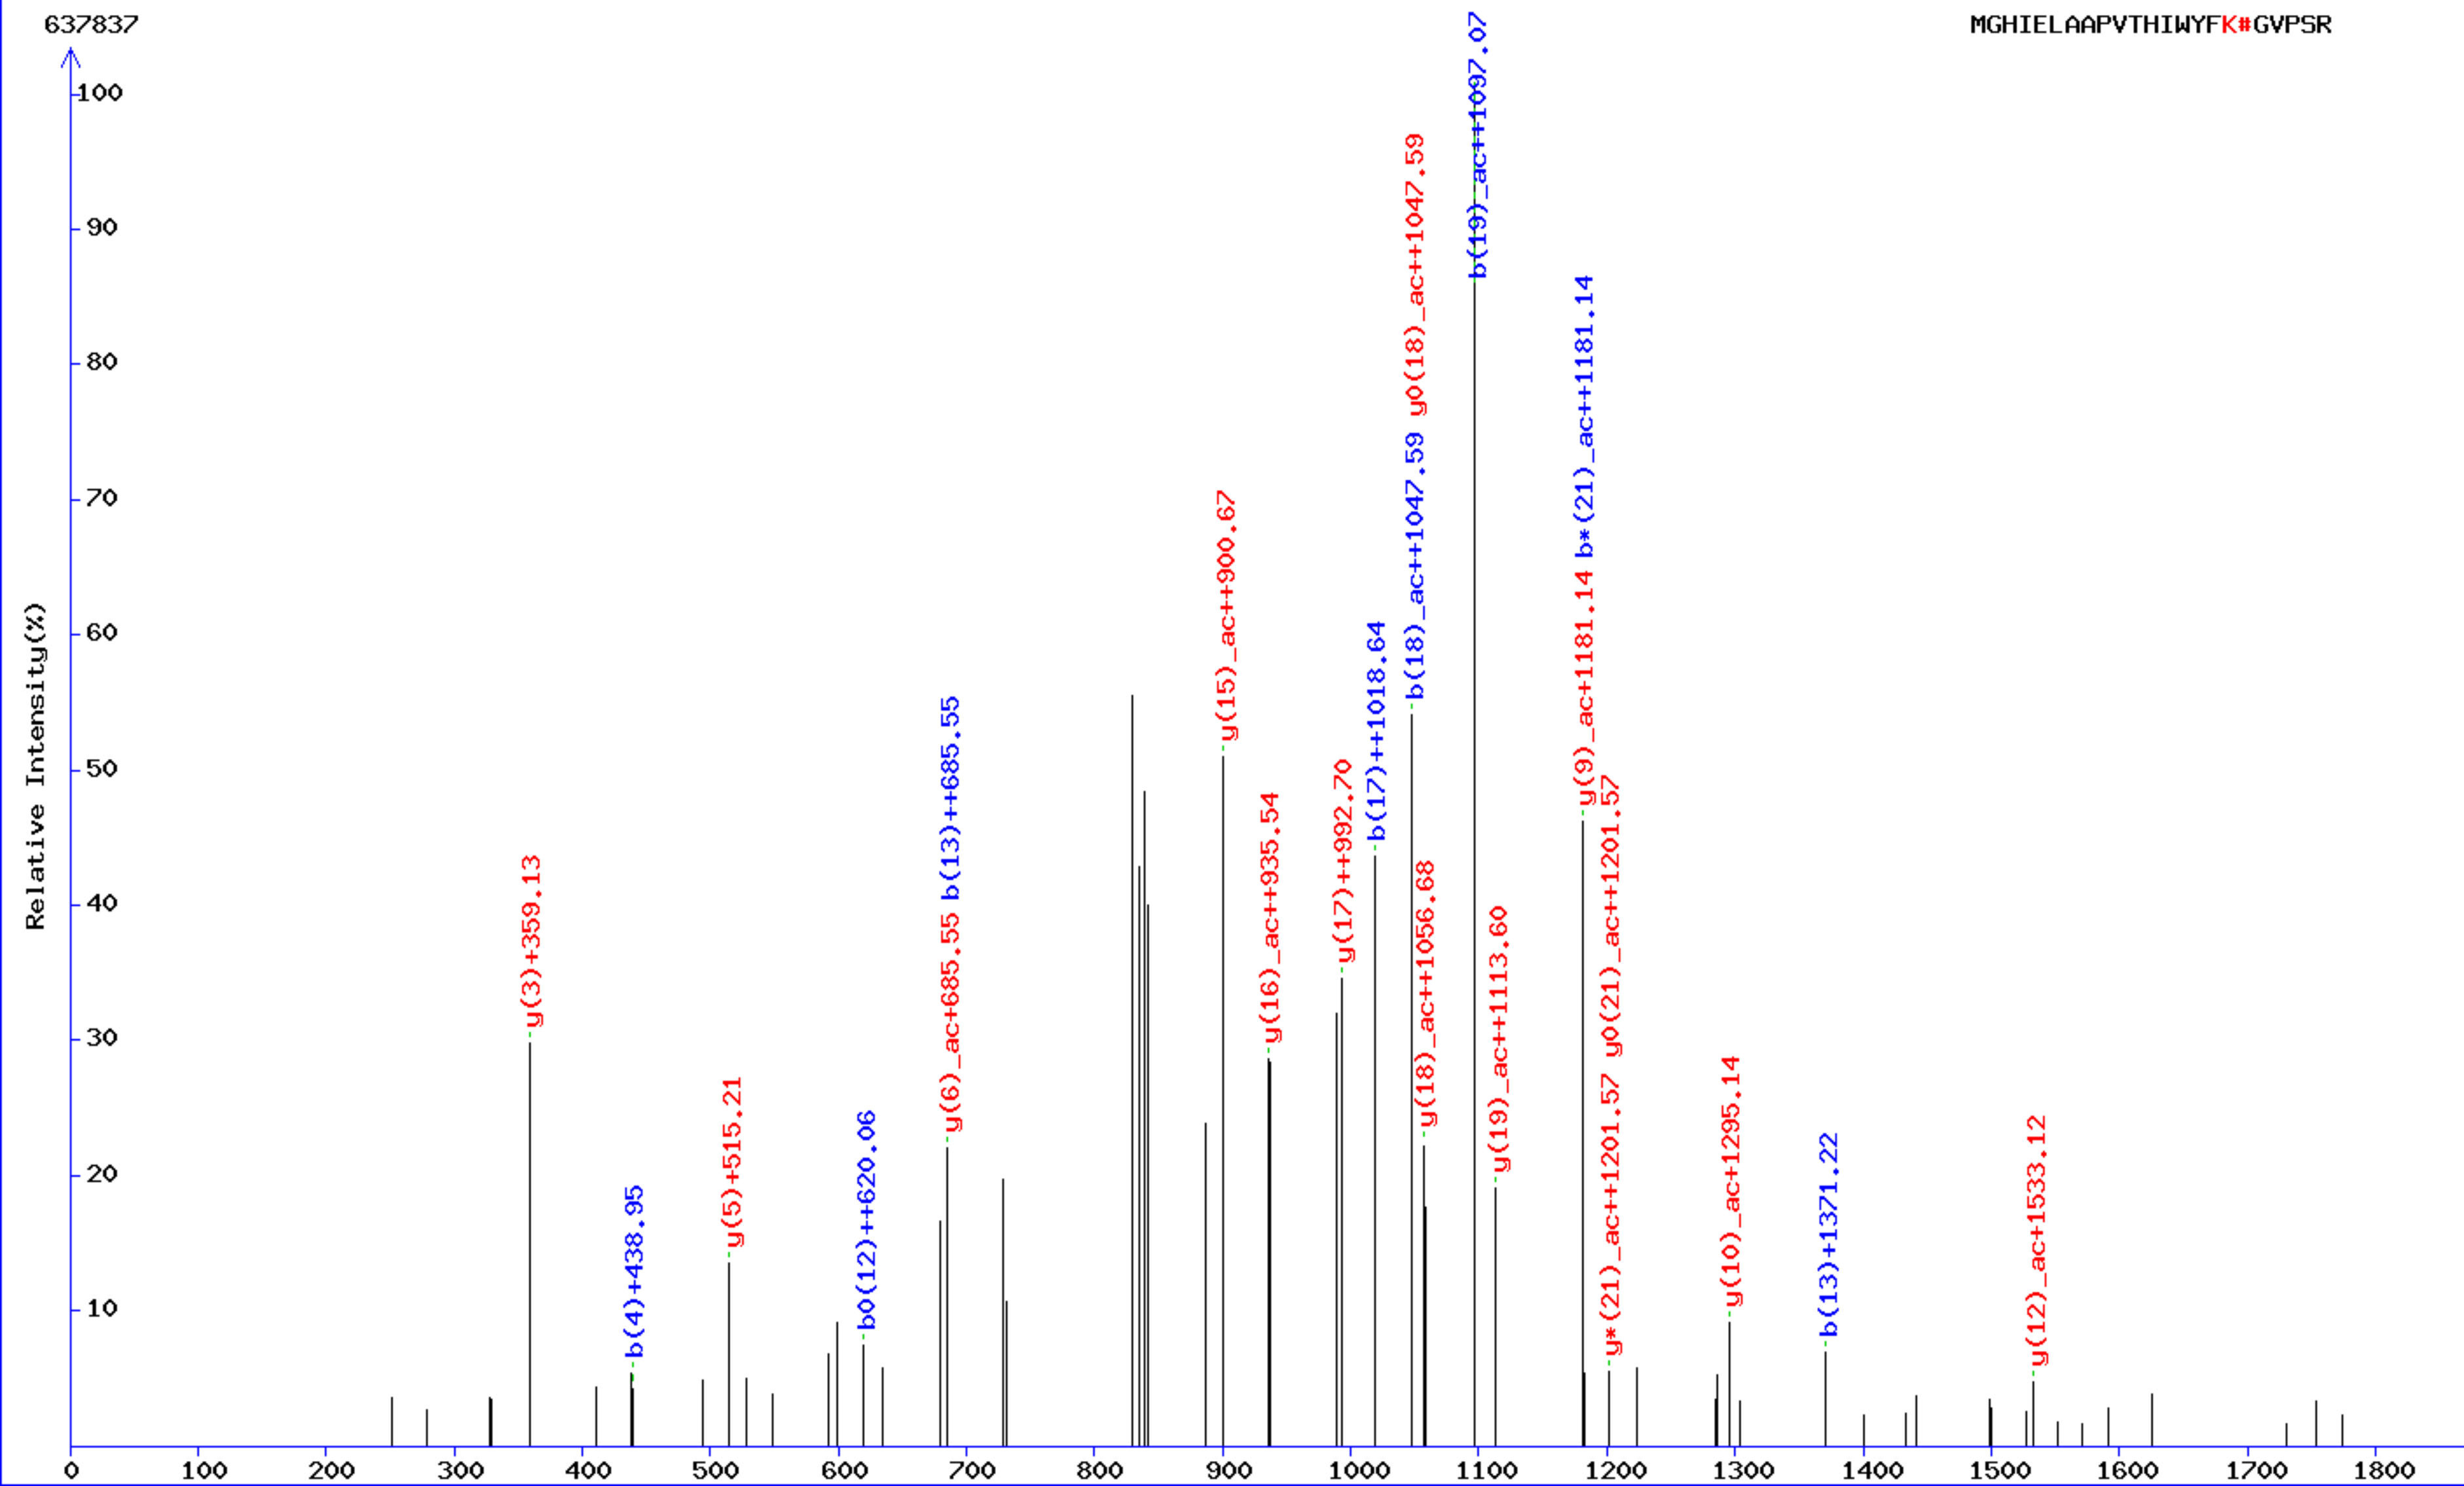

# gi|148661035 MRA\_1256 alpha-ketoglutarate decarboxylase

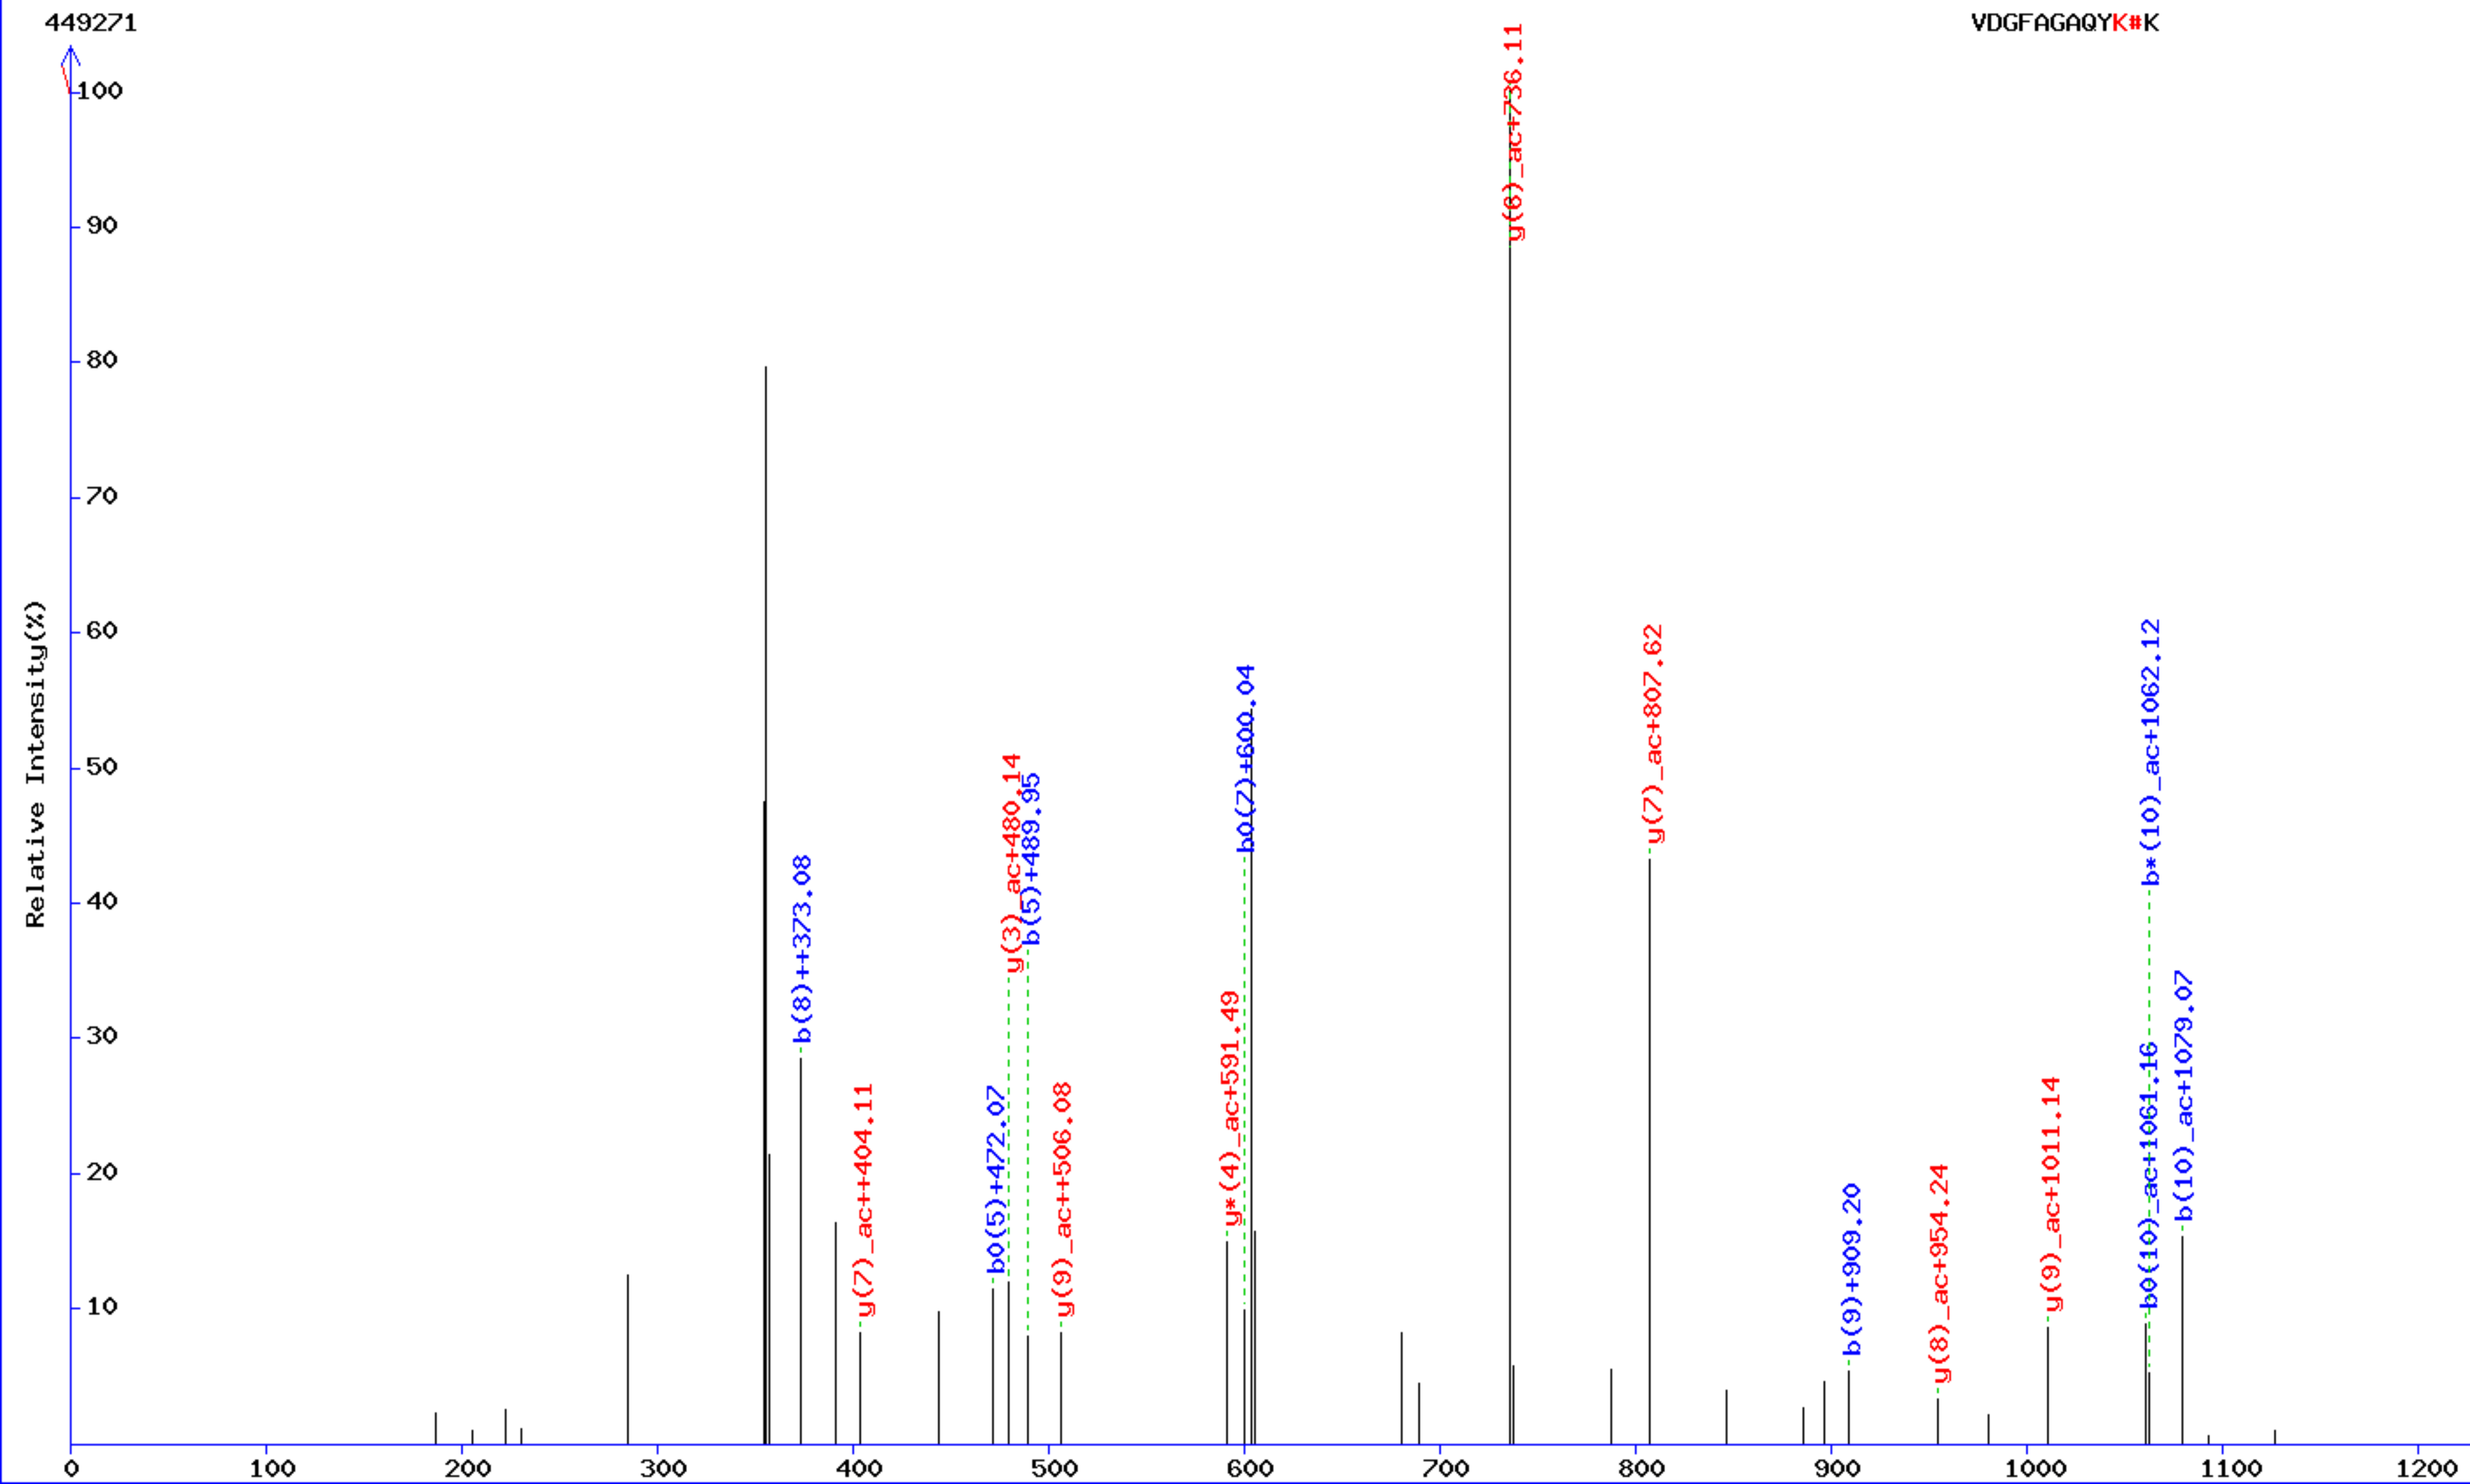

# gi|148662062 MRA\_2261 pyruvate dehydrogenase subunit E1

GYALGK#HFEGR

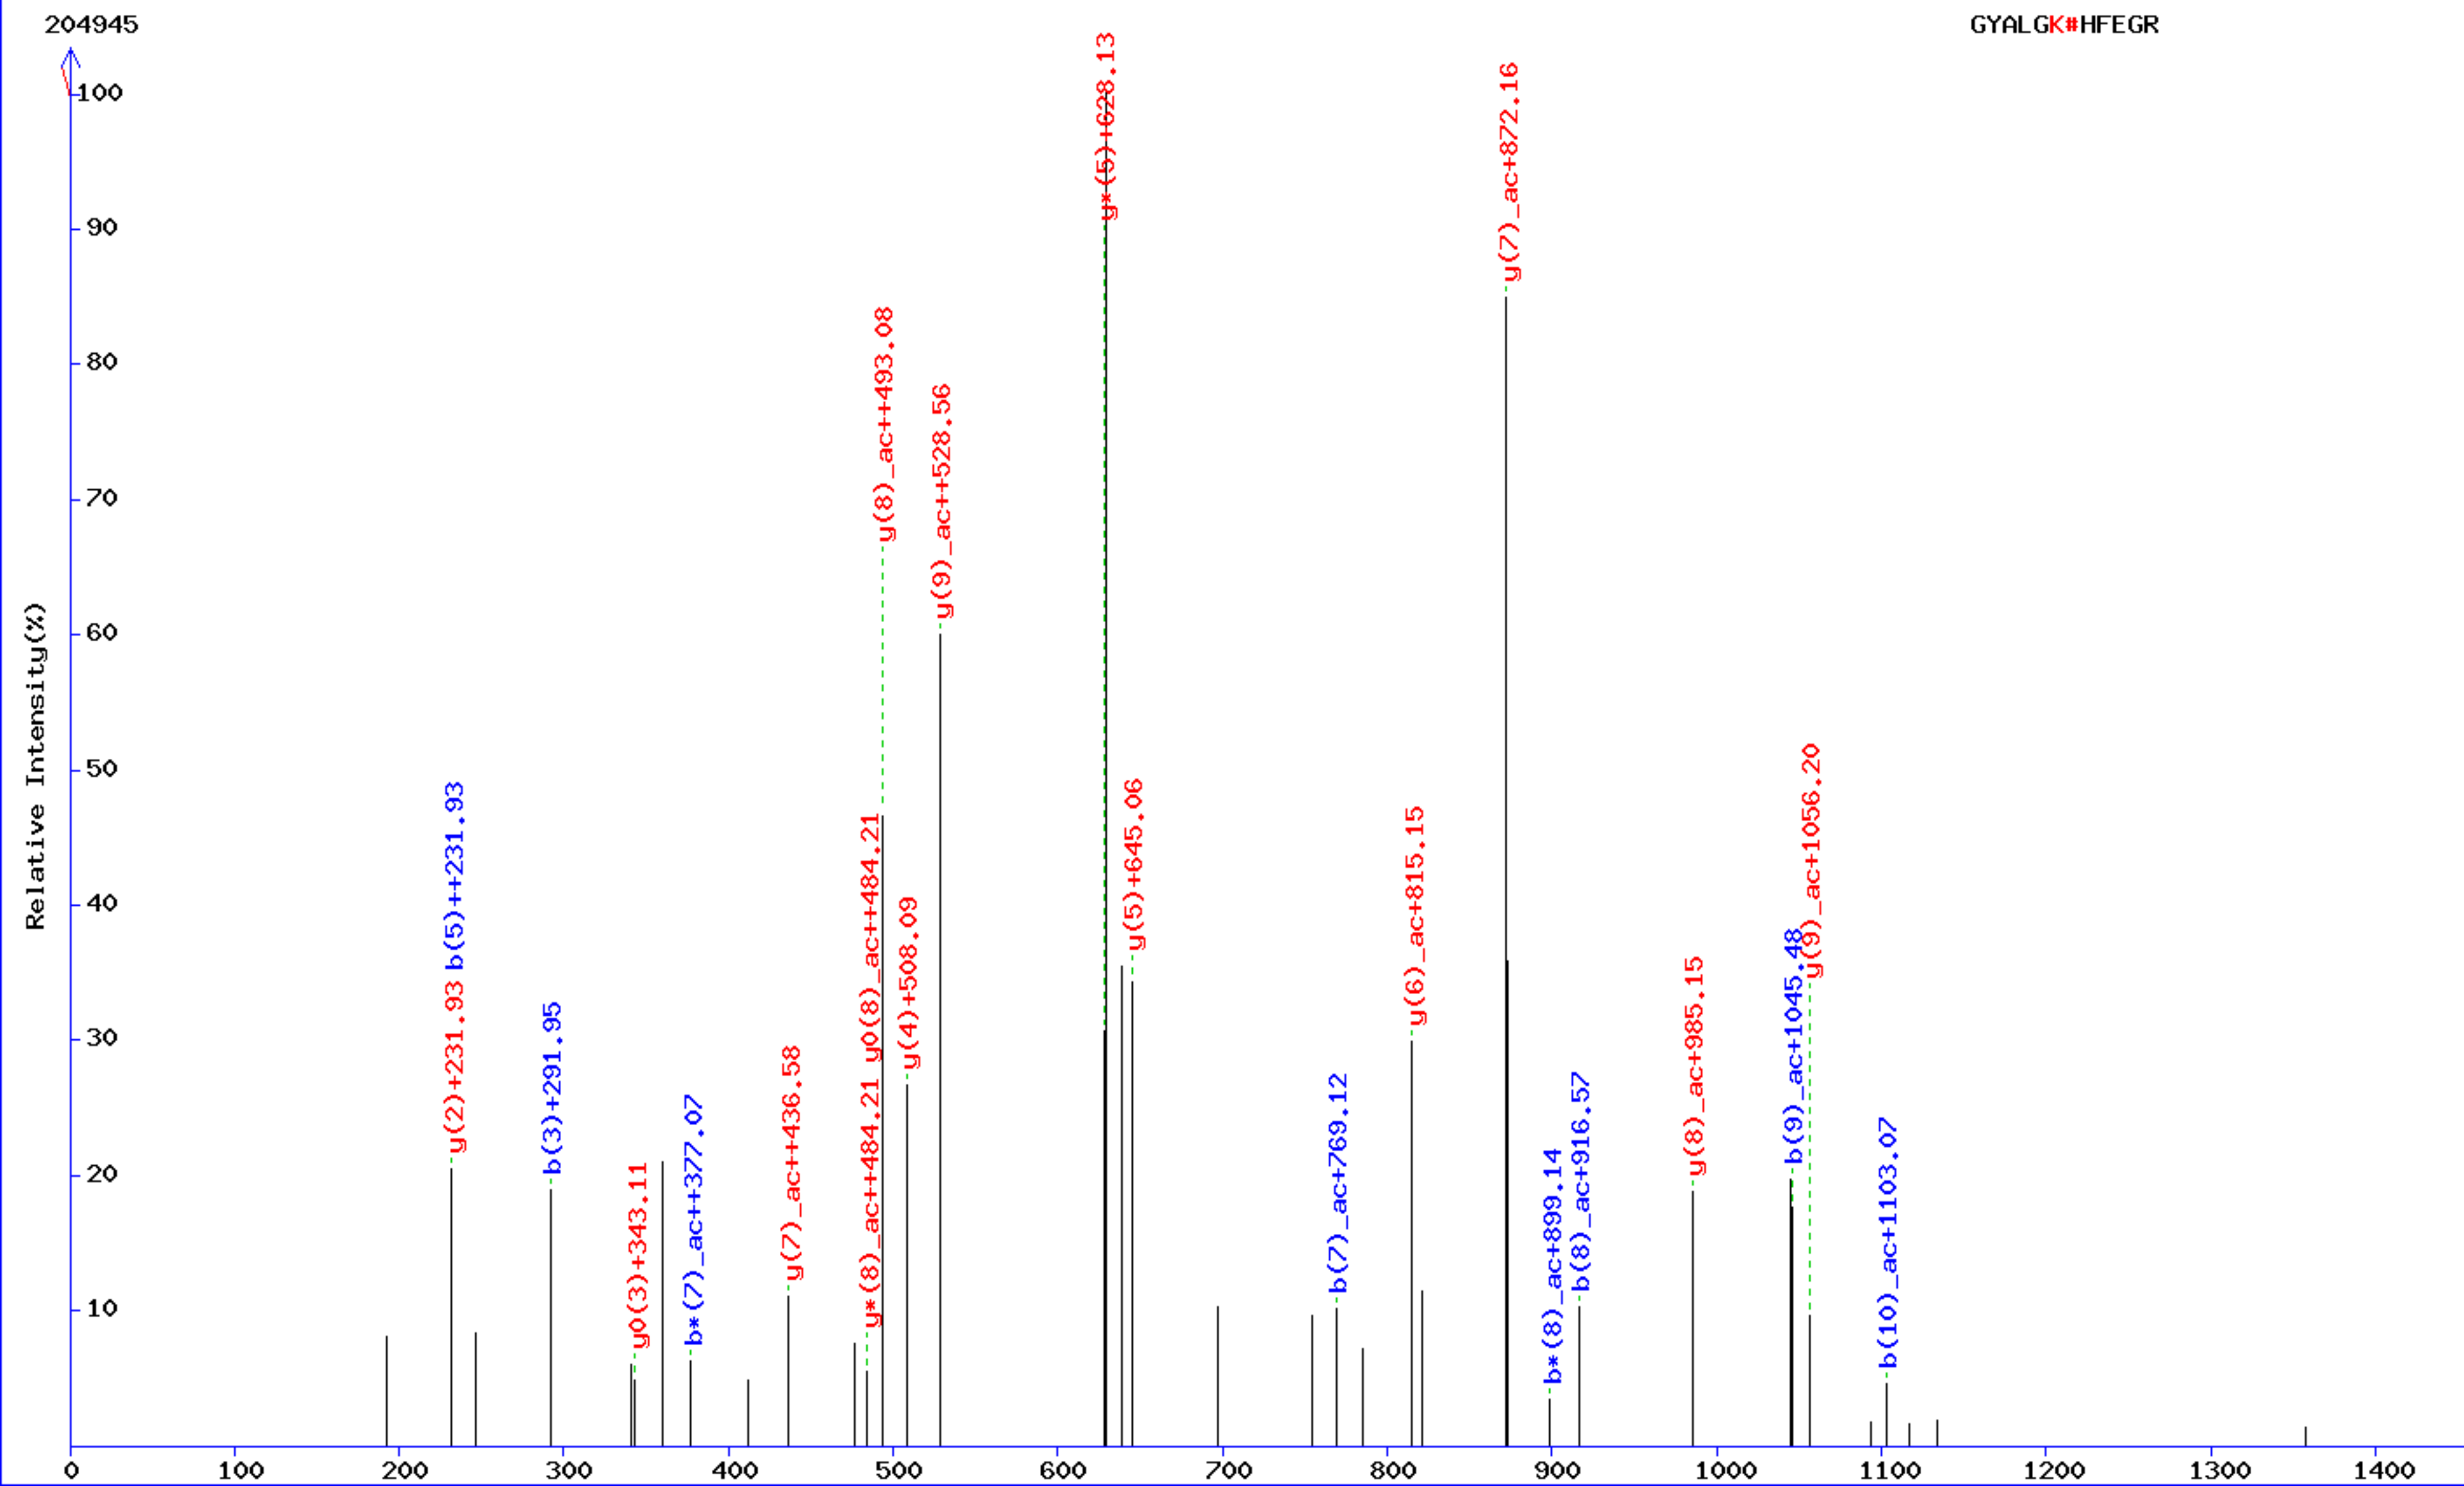

# gi|148662625 MRA\_2807 polynucleotide phosphorylase

IDEIK#TQVVQR

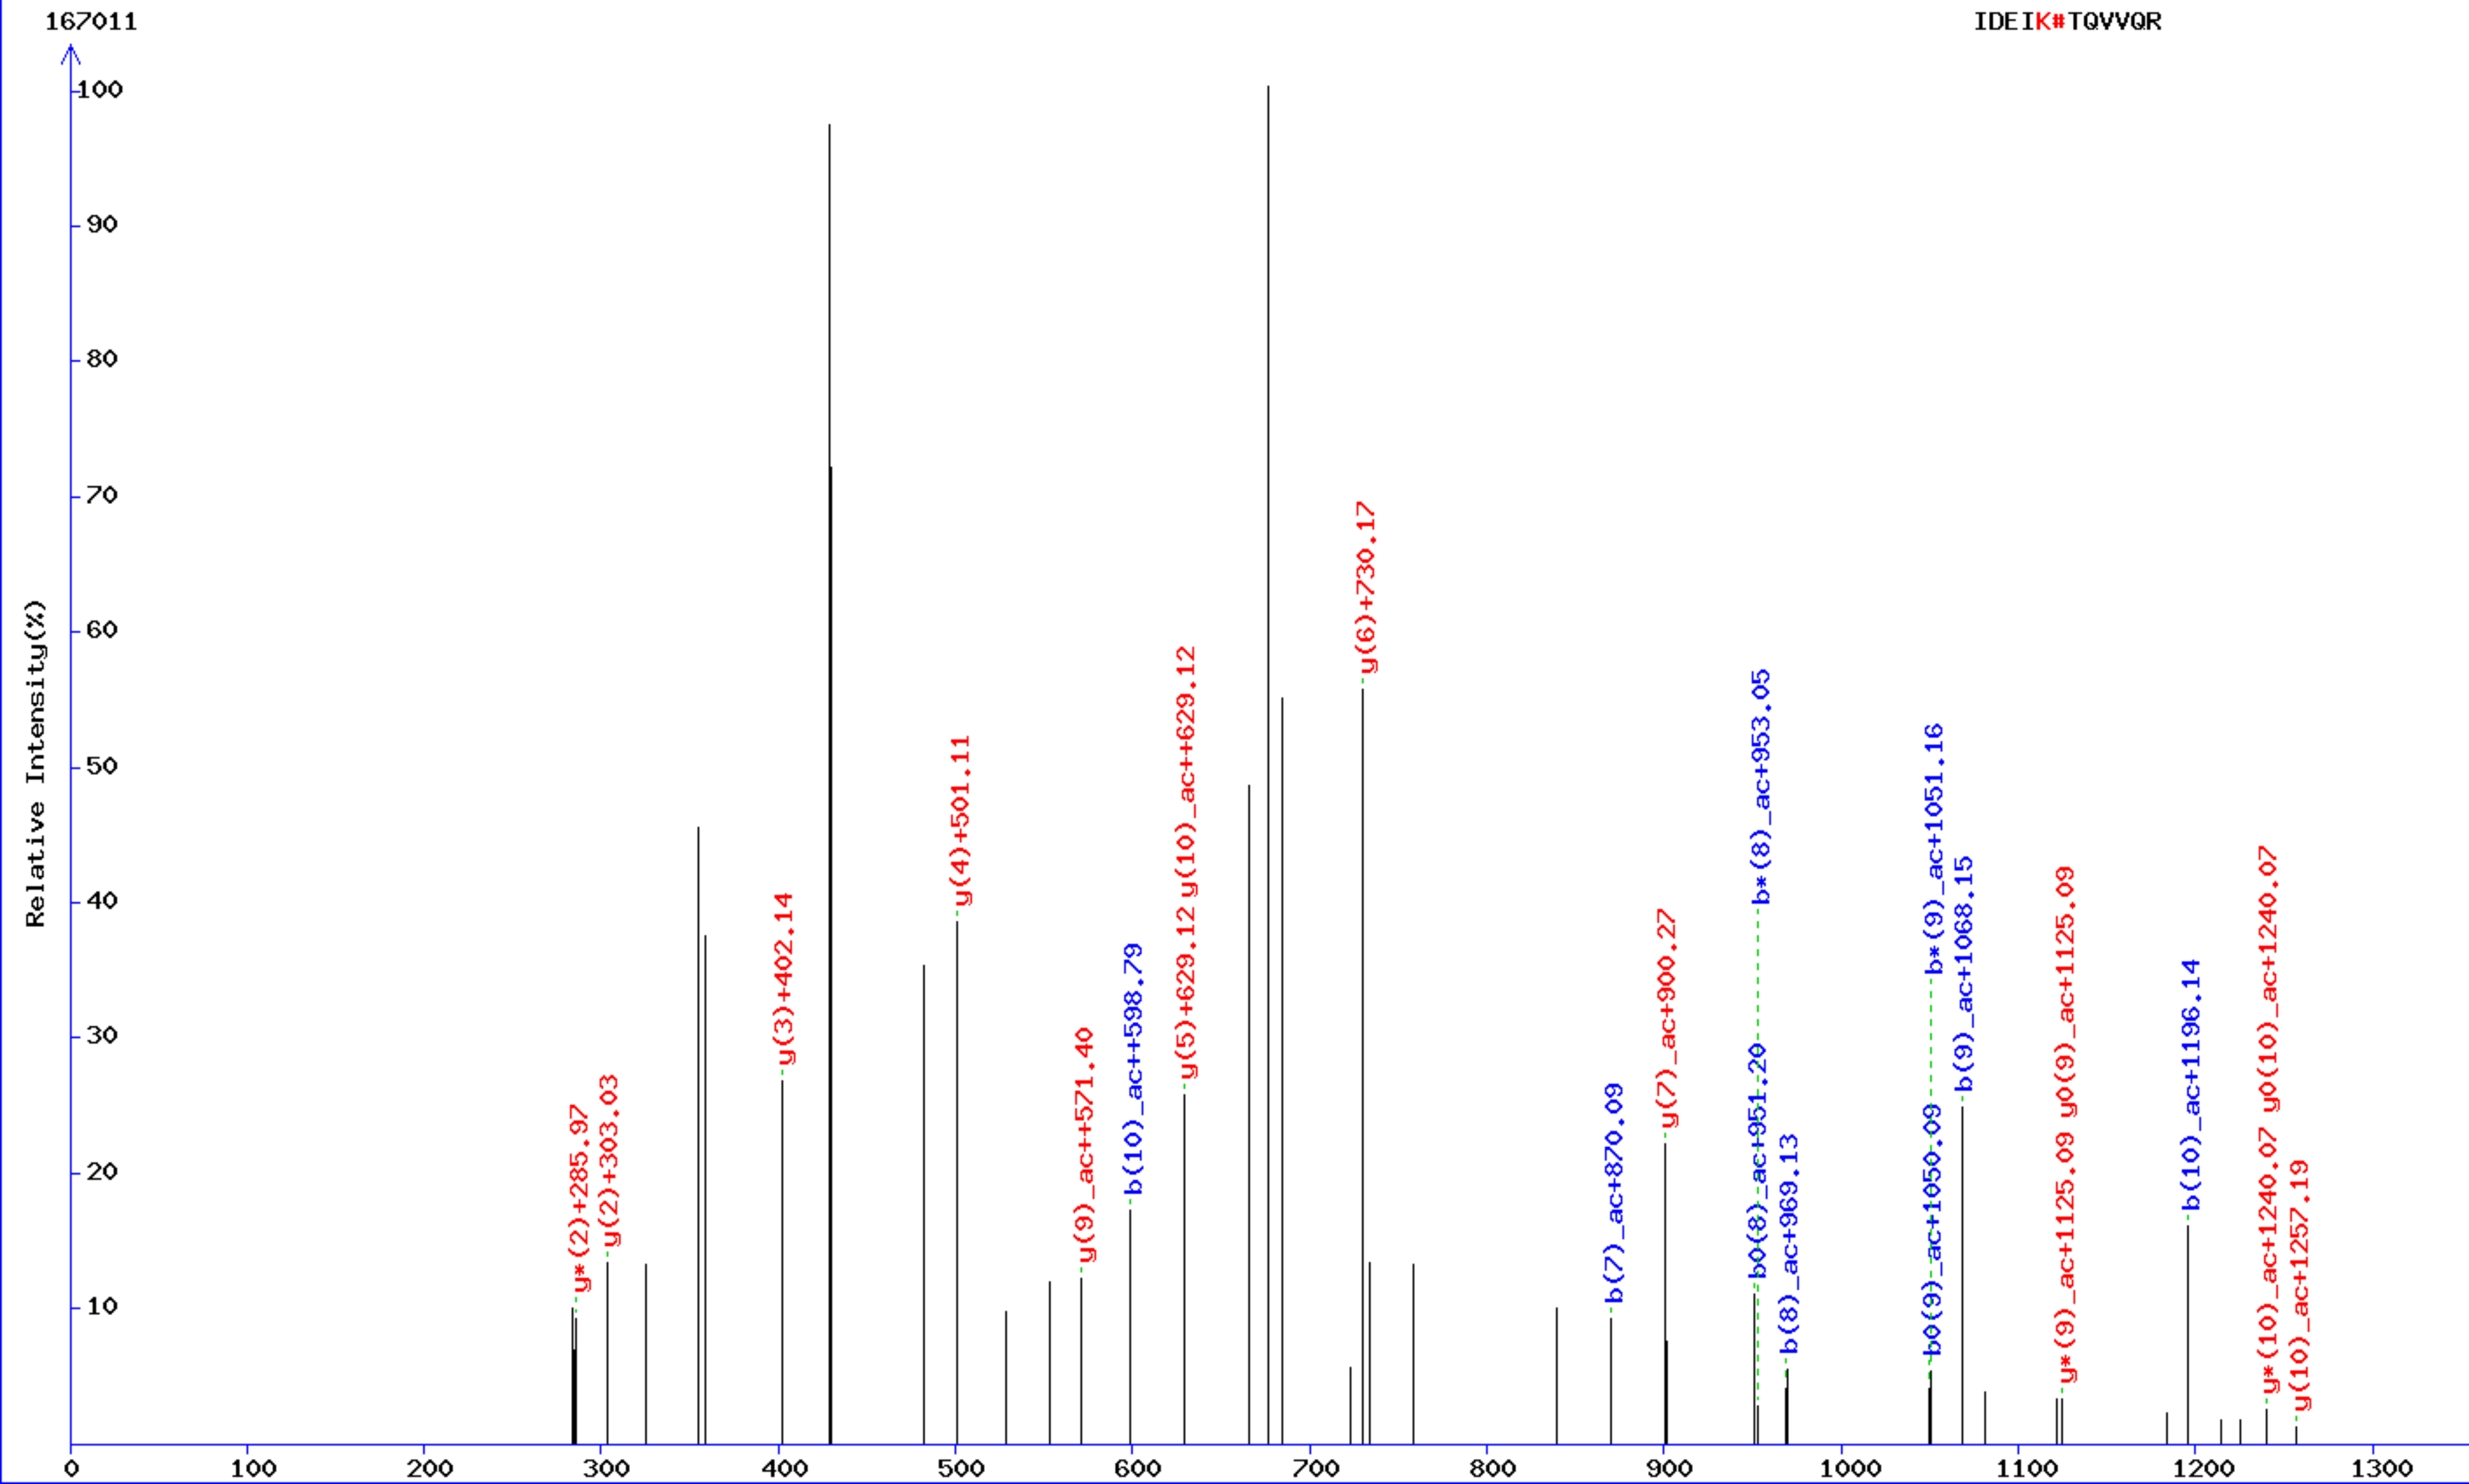

# gi|148660733 MRA\_0961 transmembrane protein

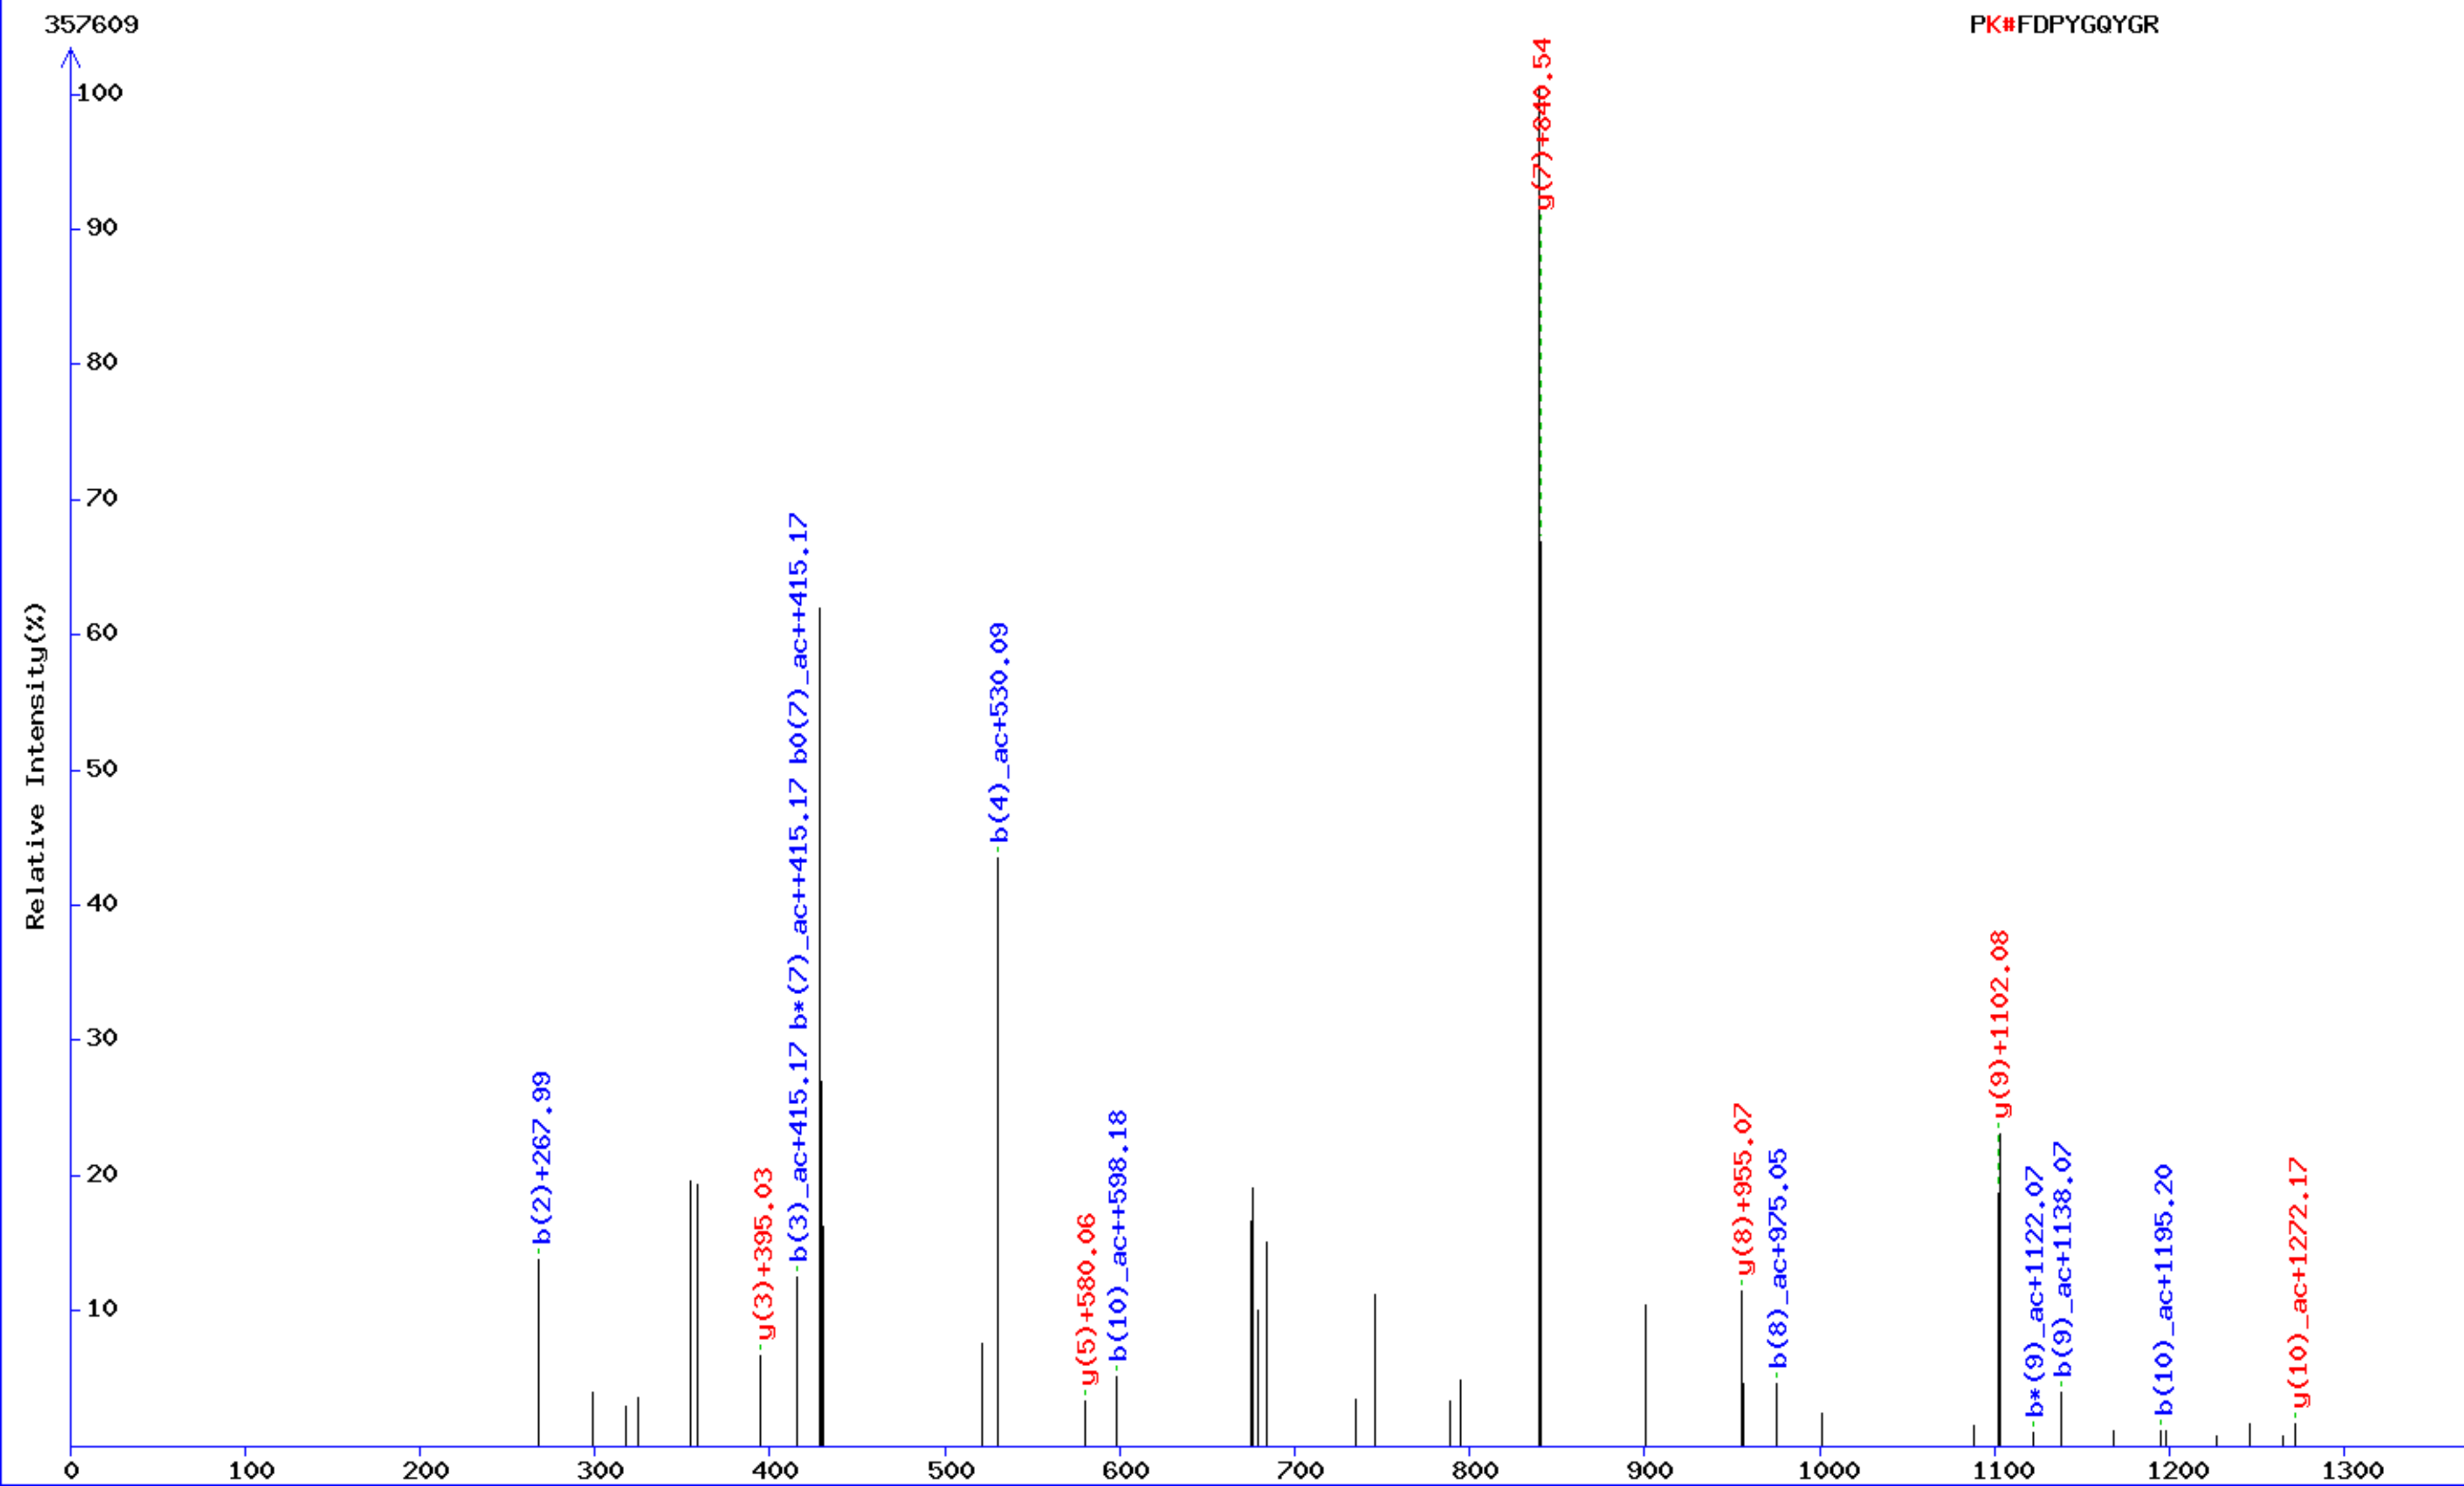

# gi|148662032 MRA\_2231 dihydrolipoamide acetyltransferase

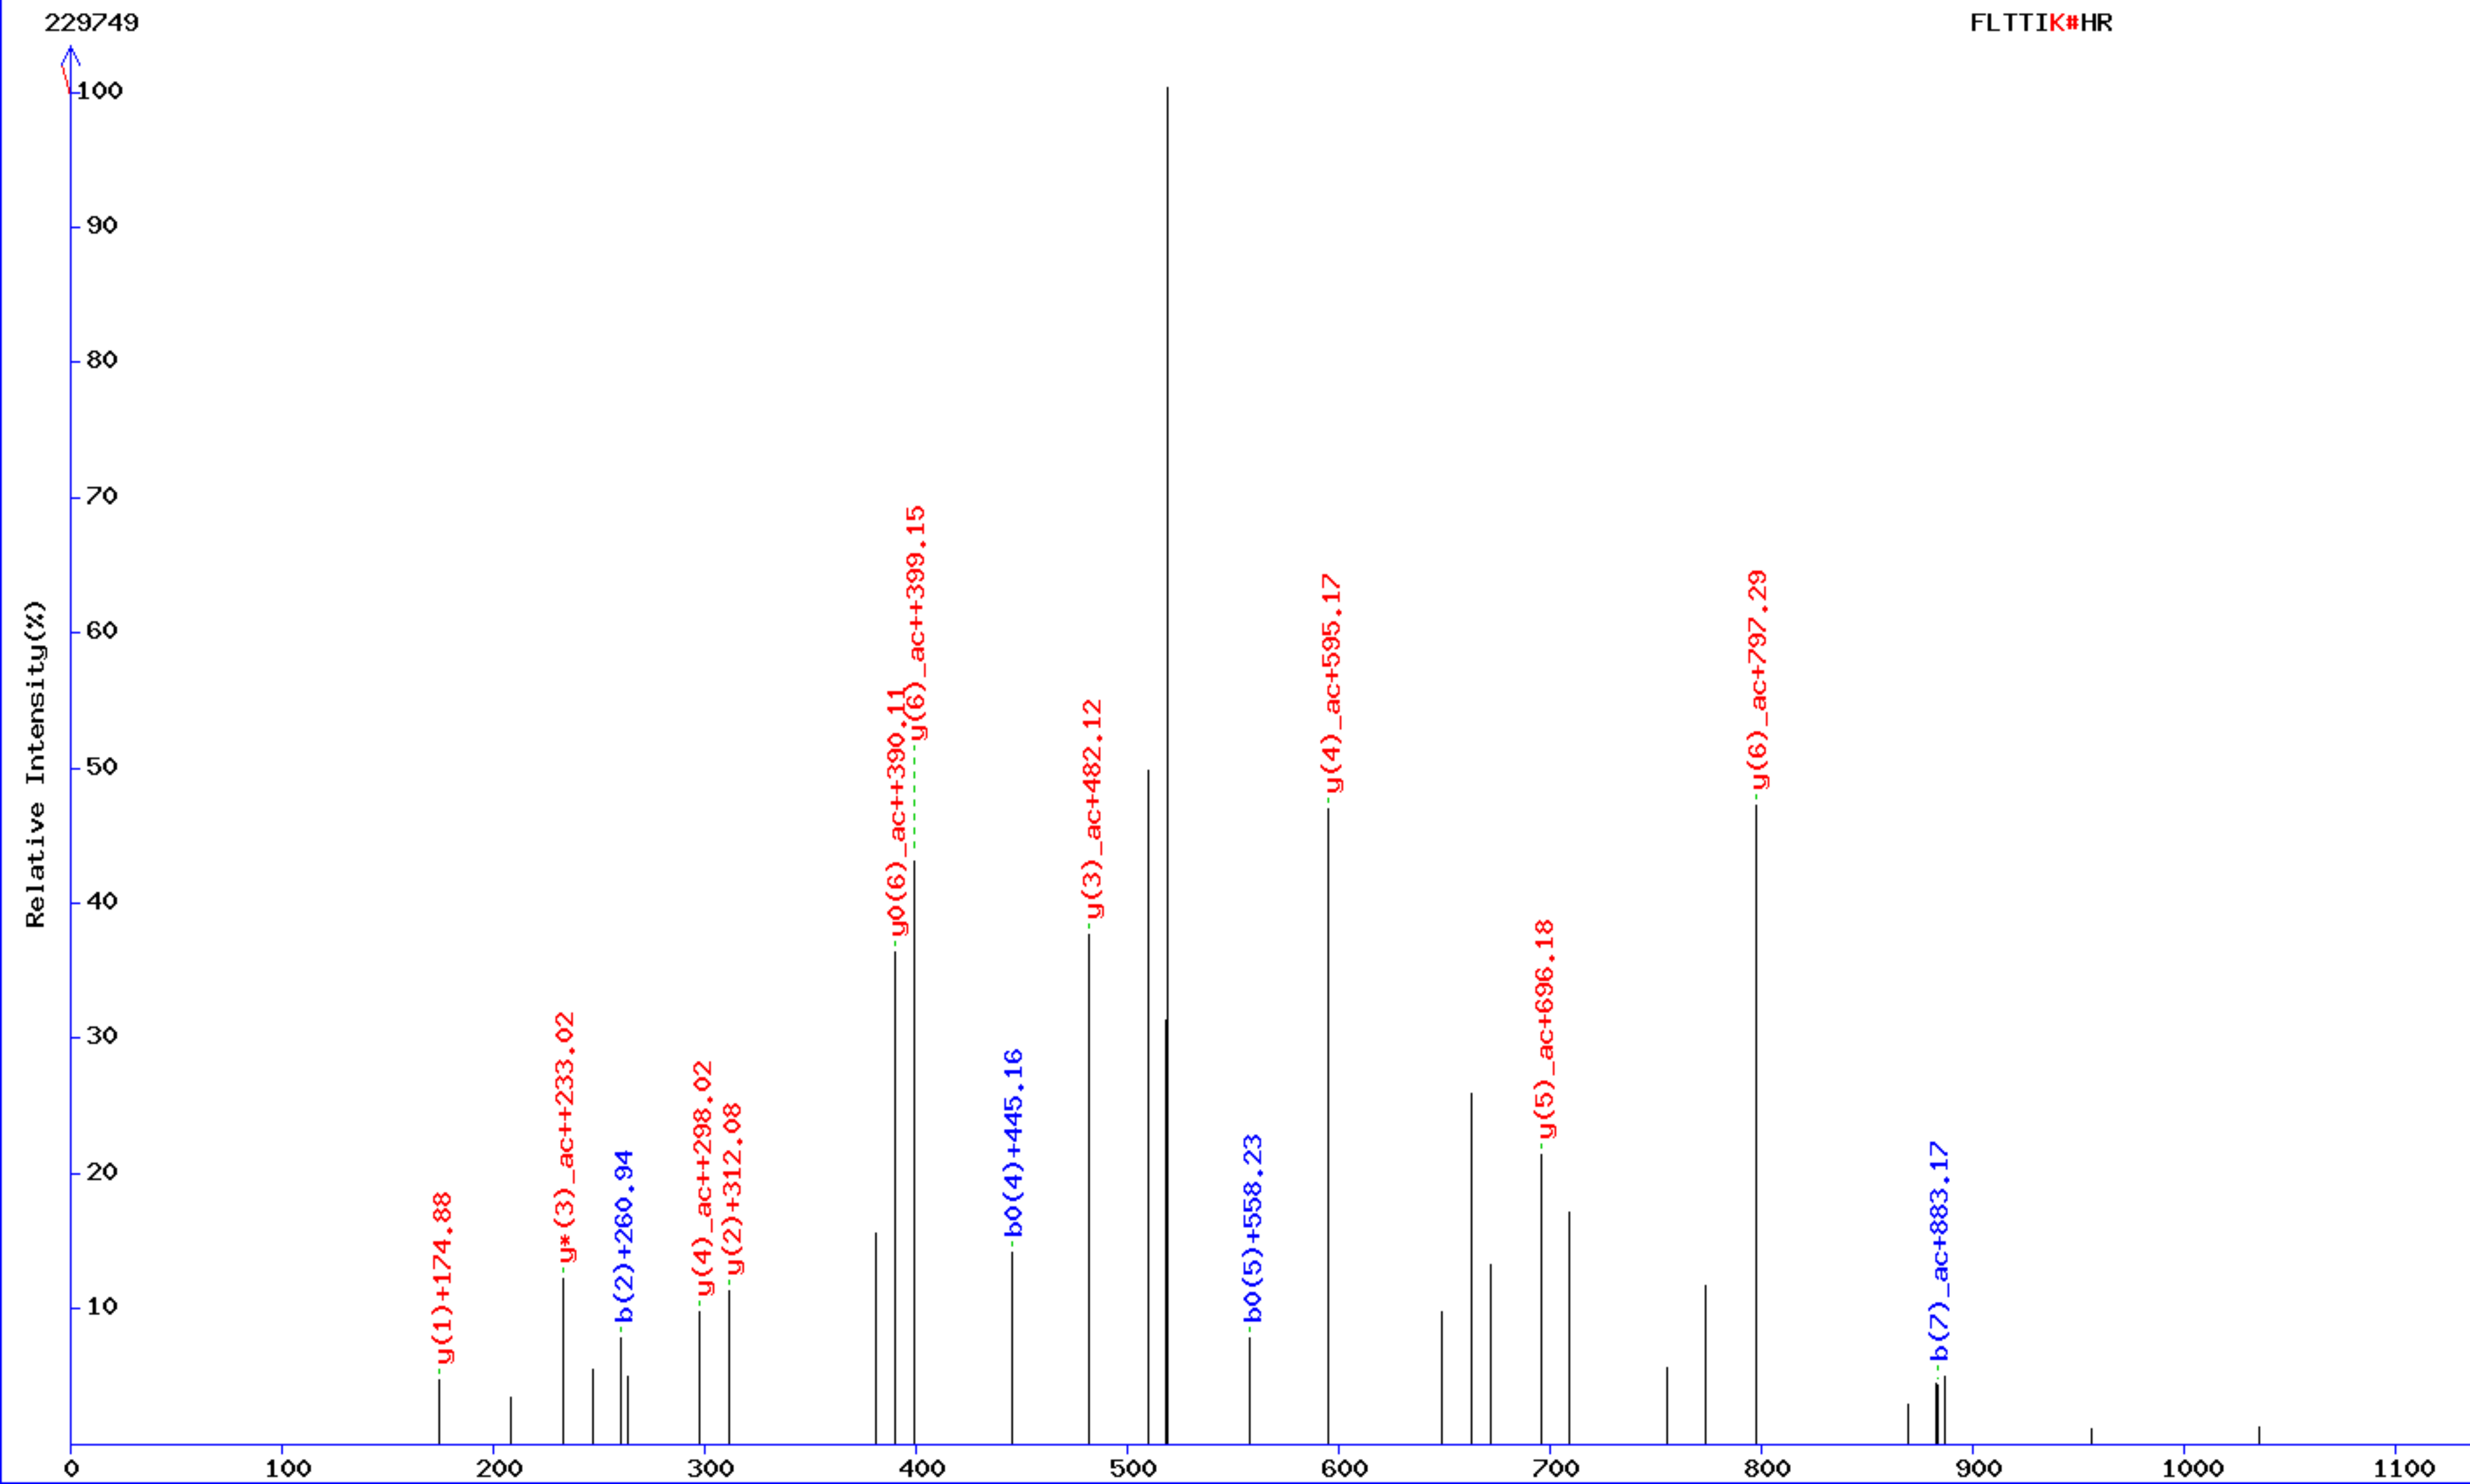

# gi|148662625 MRA\_2807 polynucleotide phosphorylase

IDEIK#TQVVQR

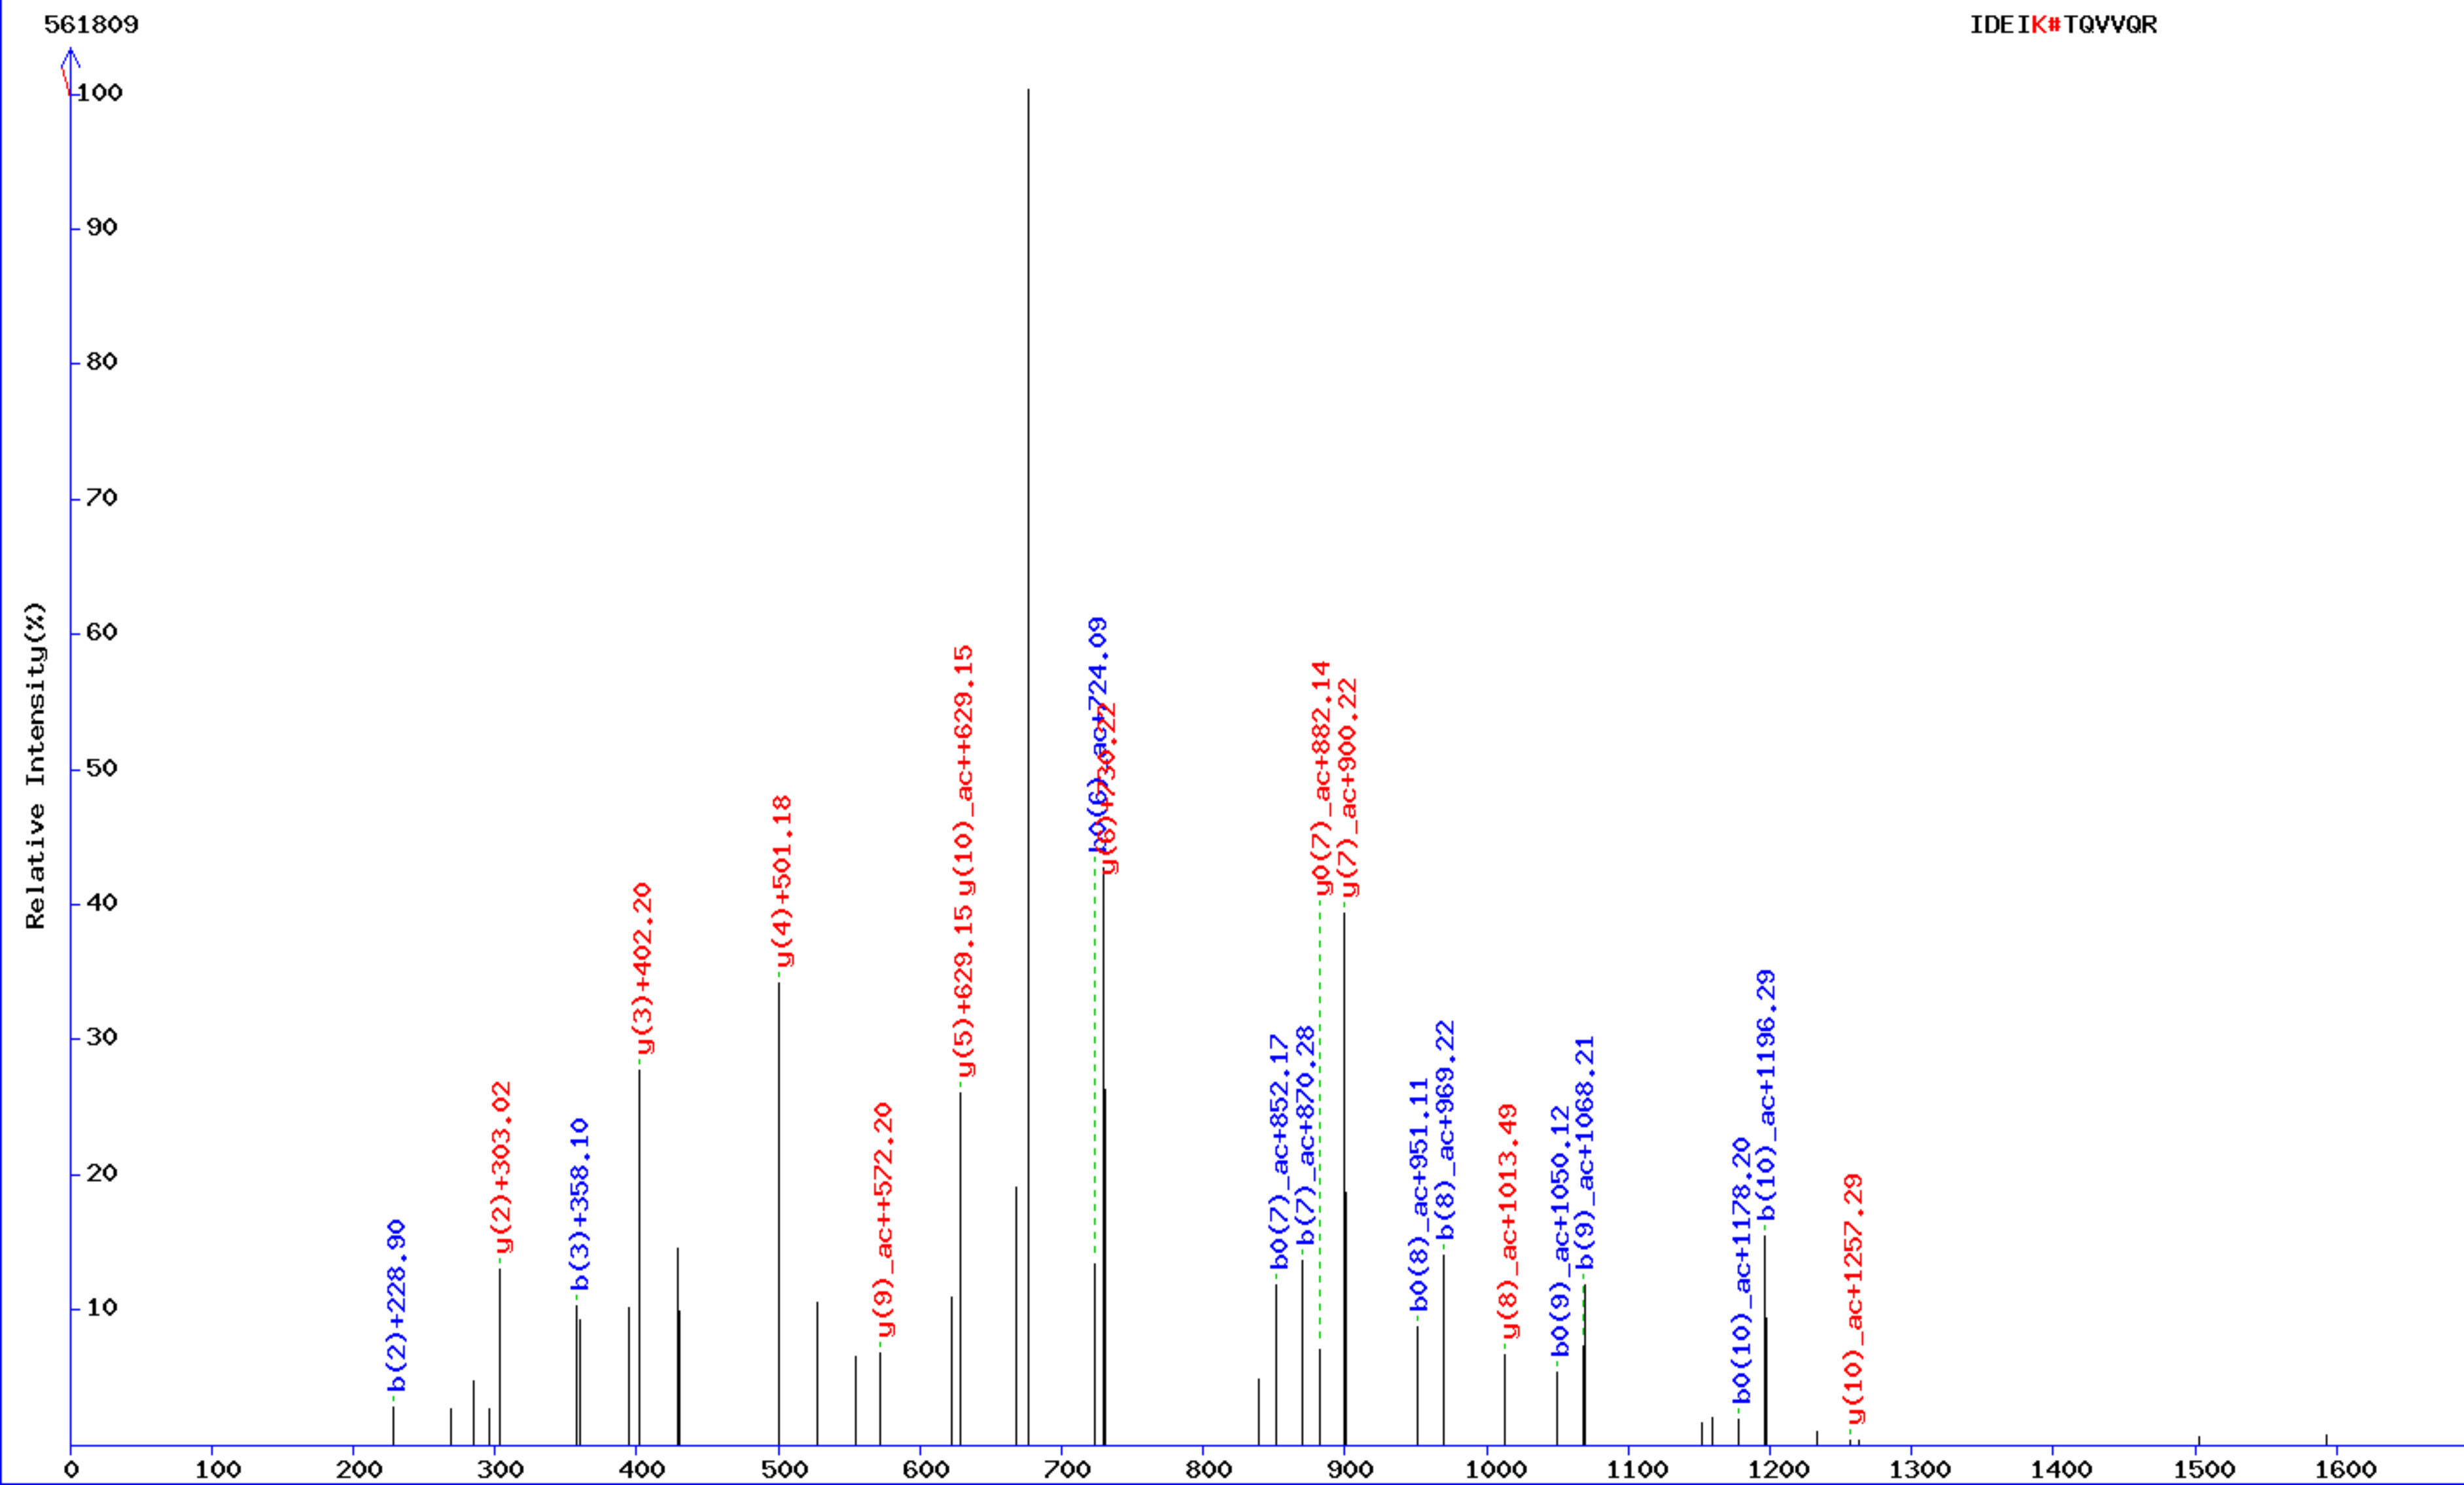



# gi|148662625 MRA\_2807 polynucleotide phosphorylase

VEIADIDK#R

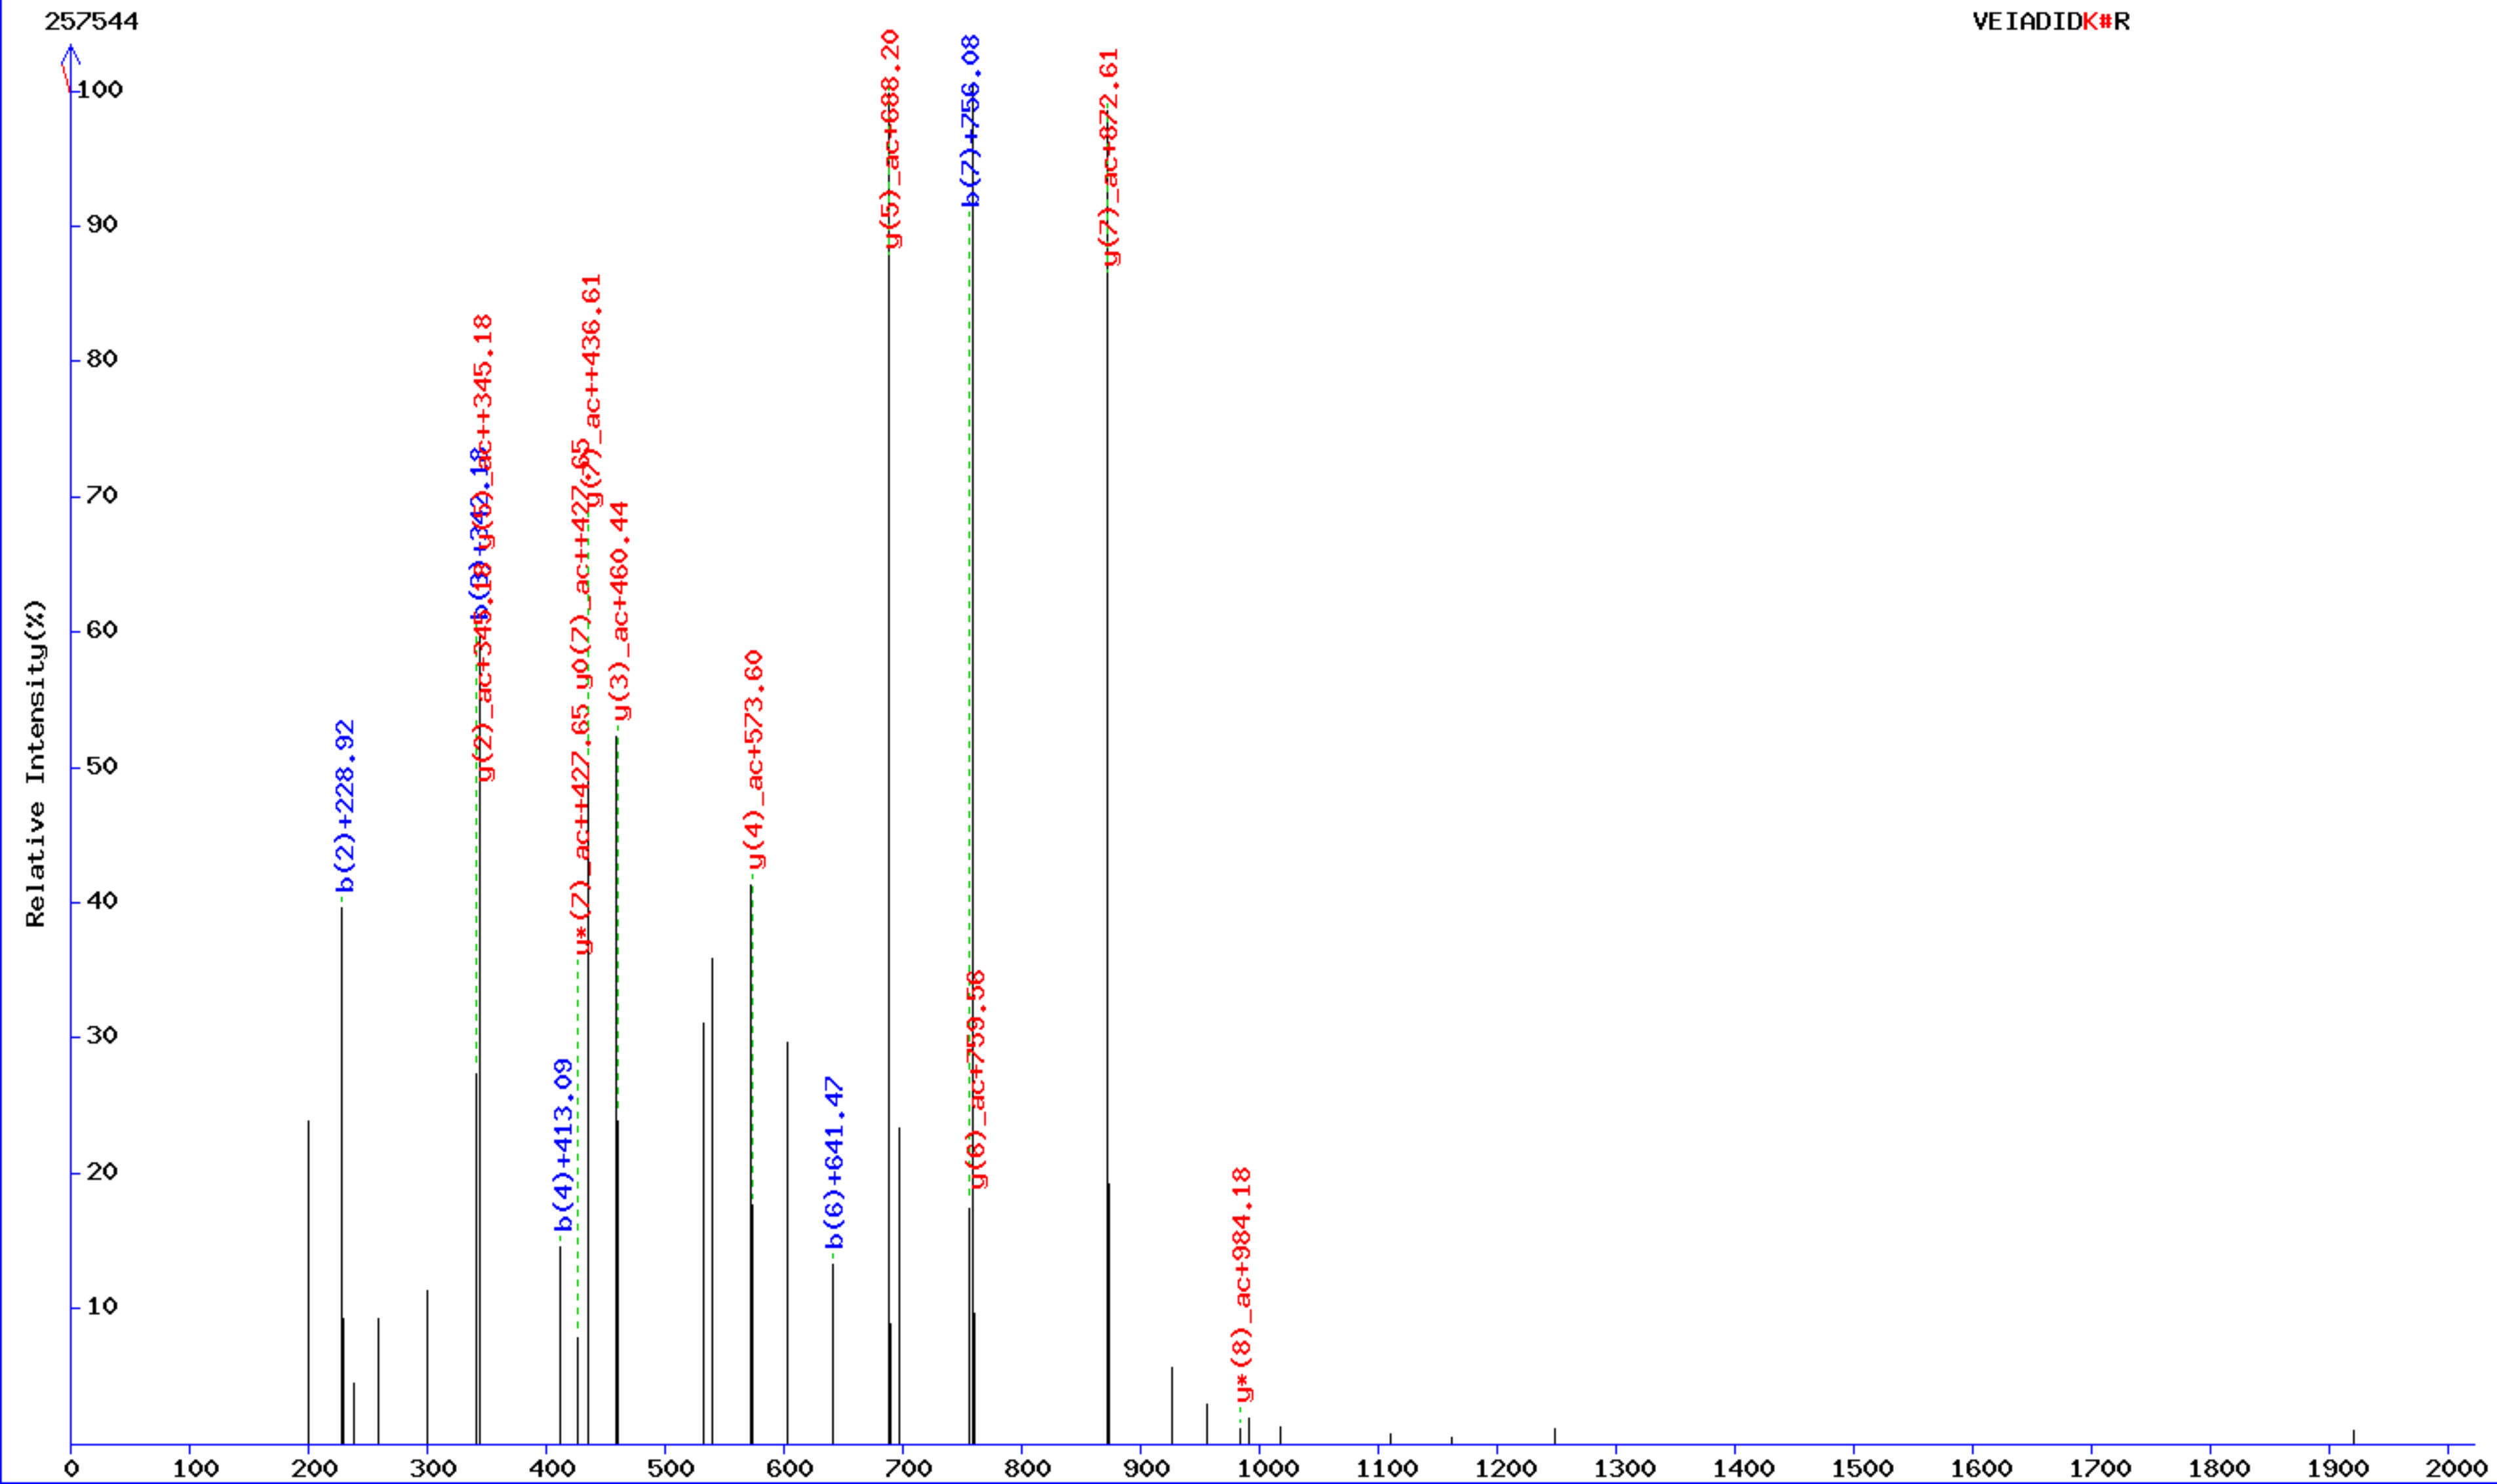

# gi|148662062 MRA\_2261 pyruvate dehydrogenase subunit E1

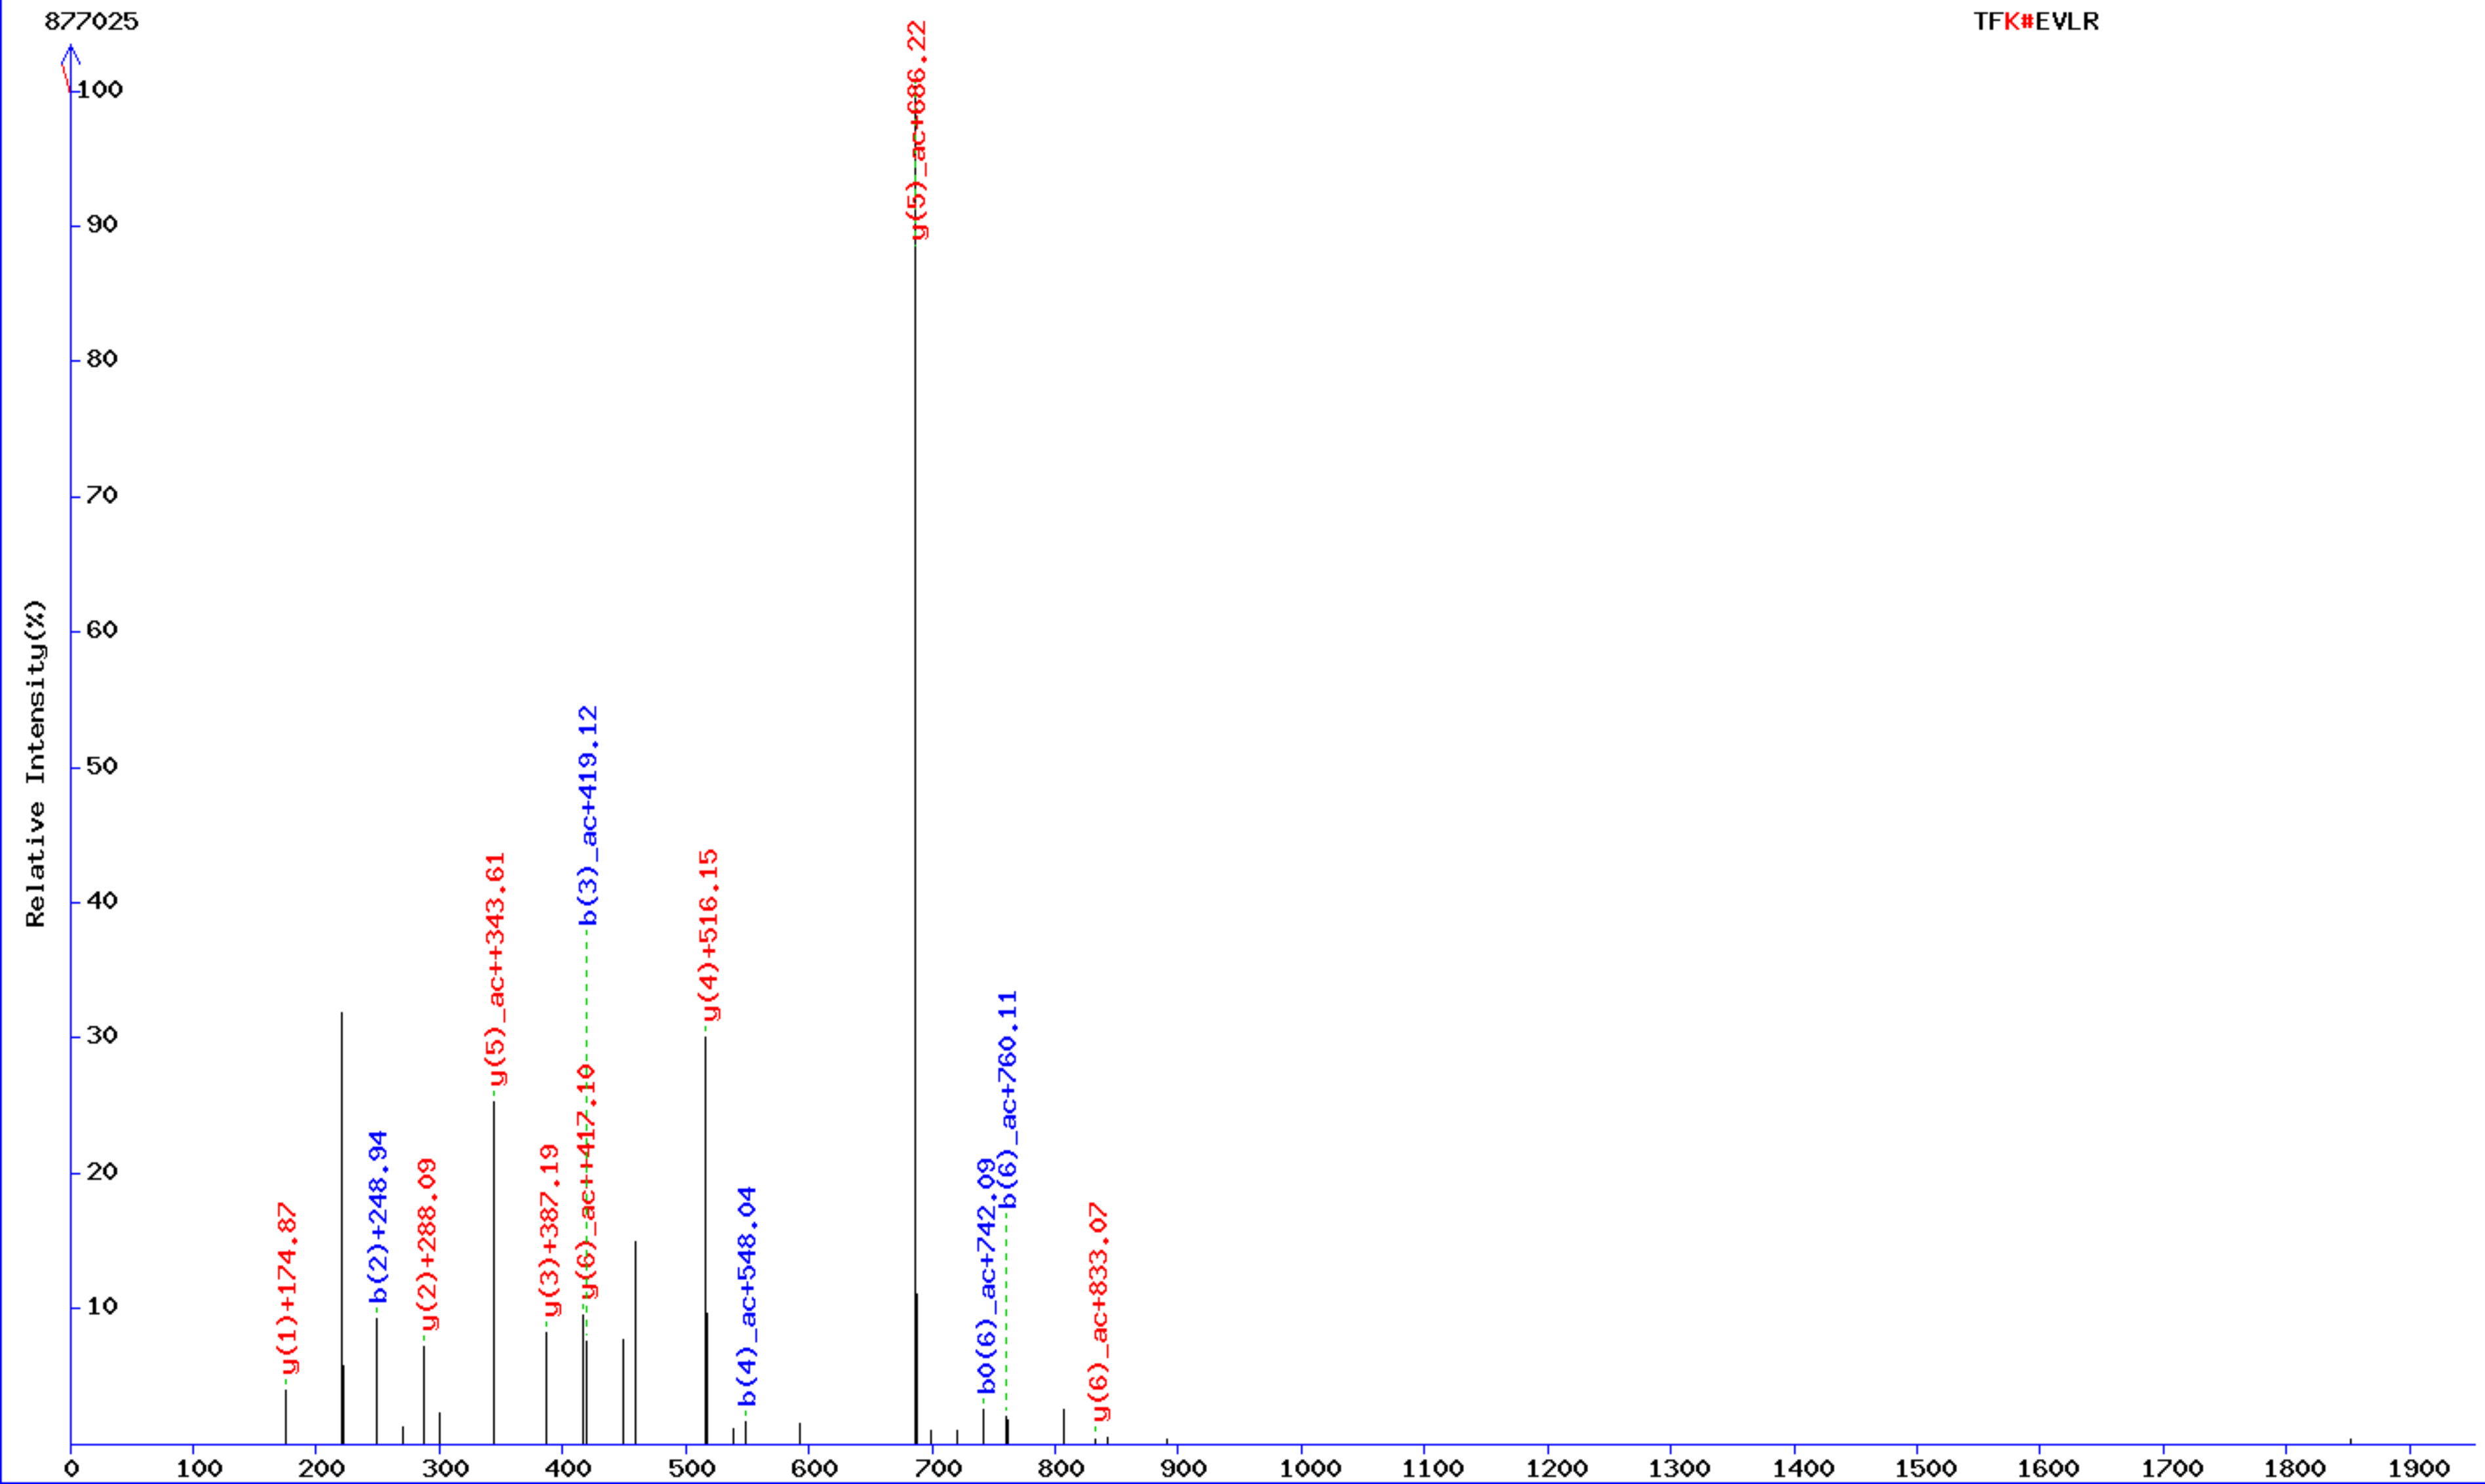

# gi|148660459 MRA\_0693 elongation factor G

LGK#LFQMHSNK

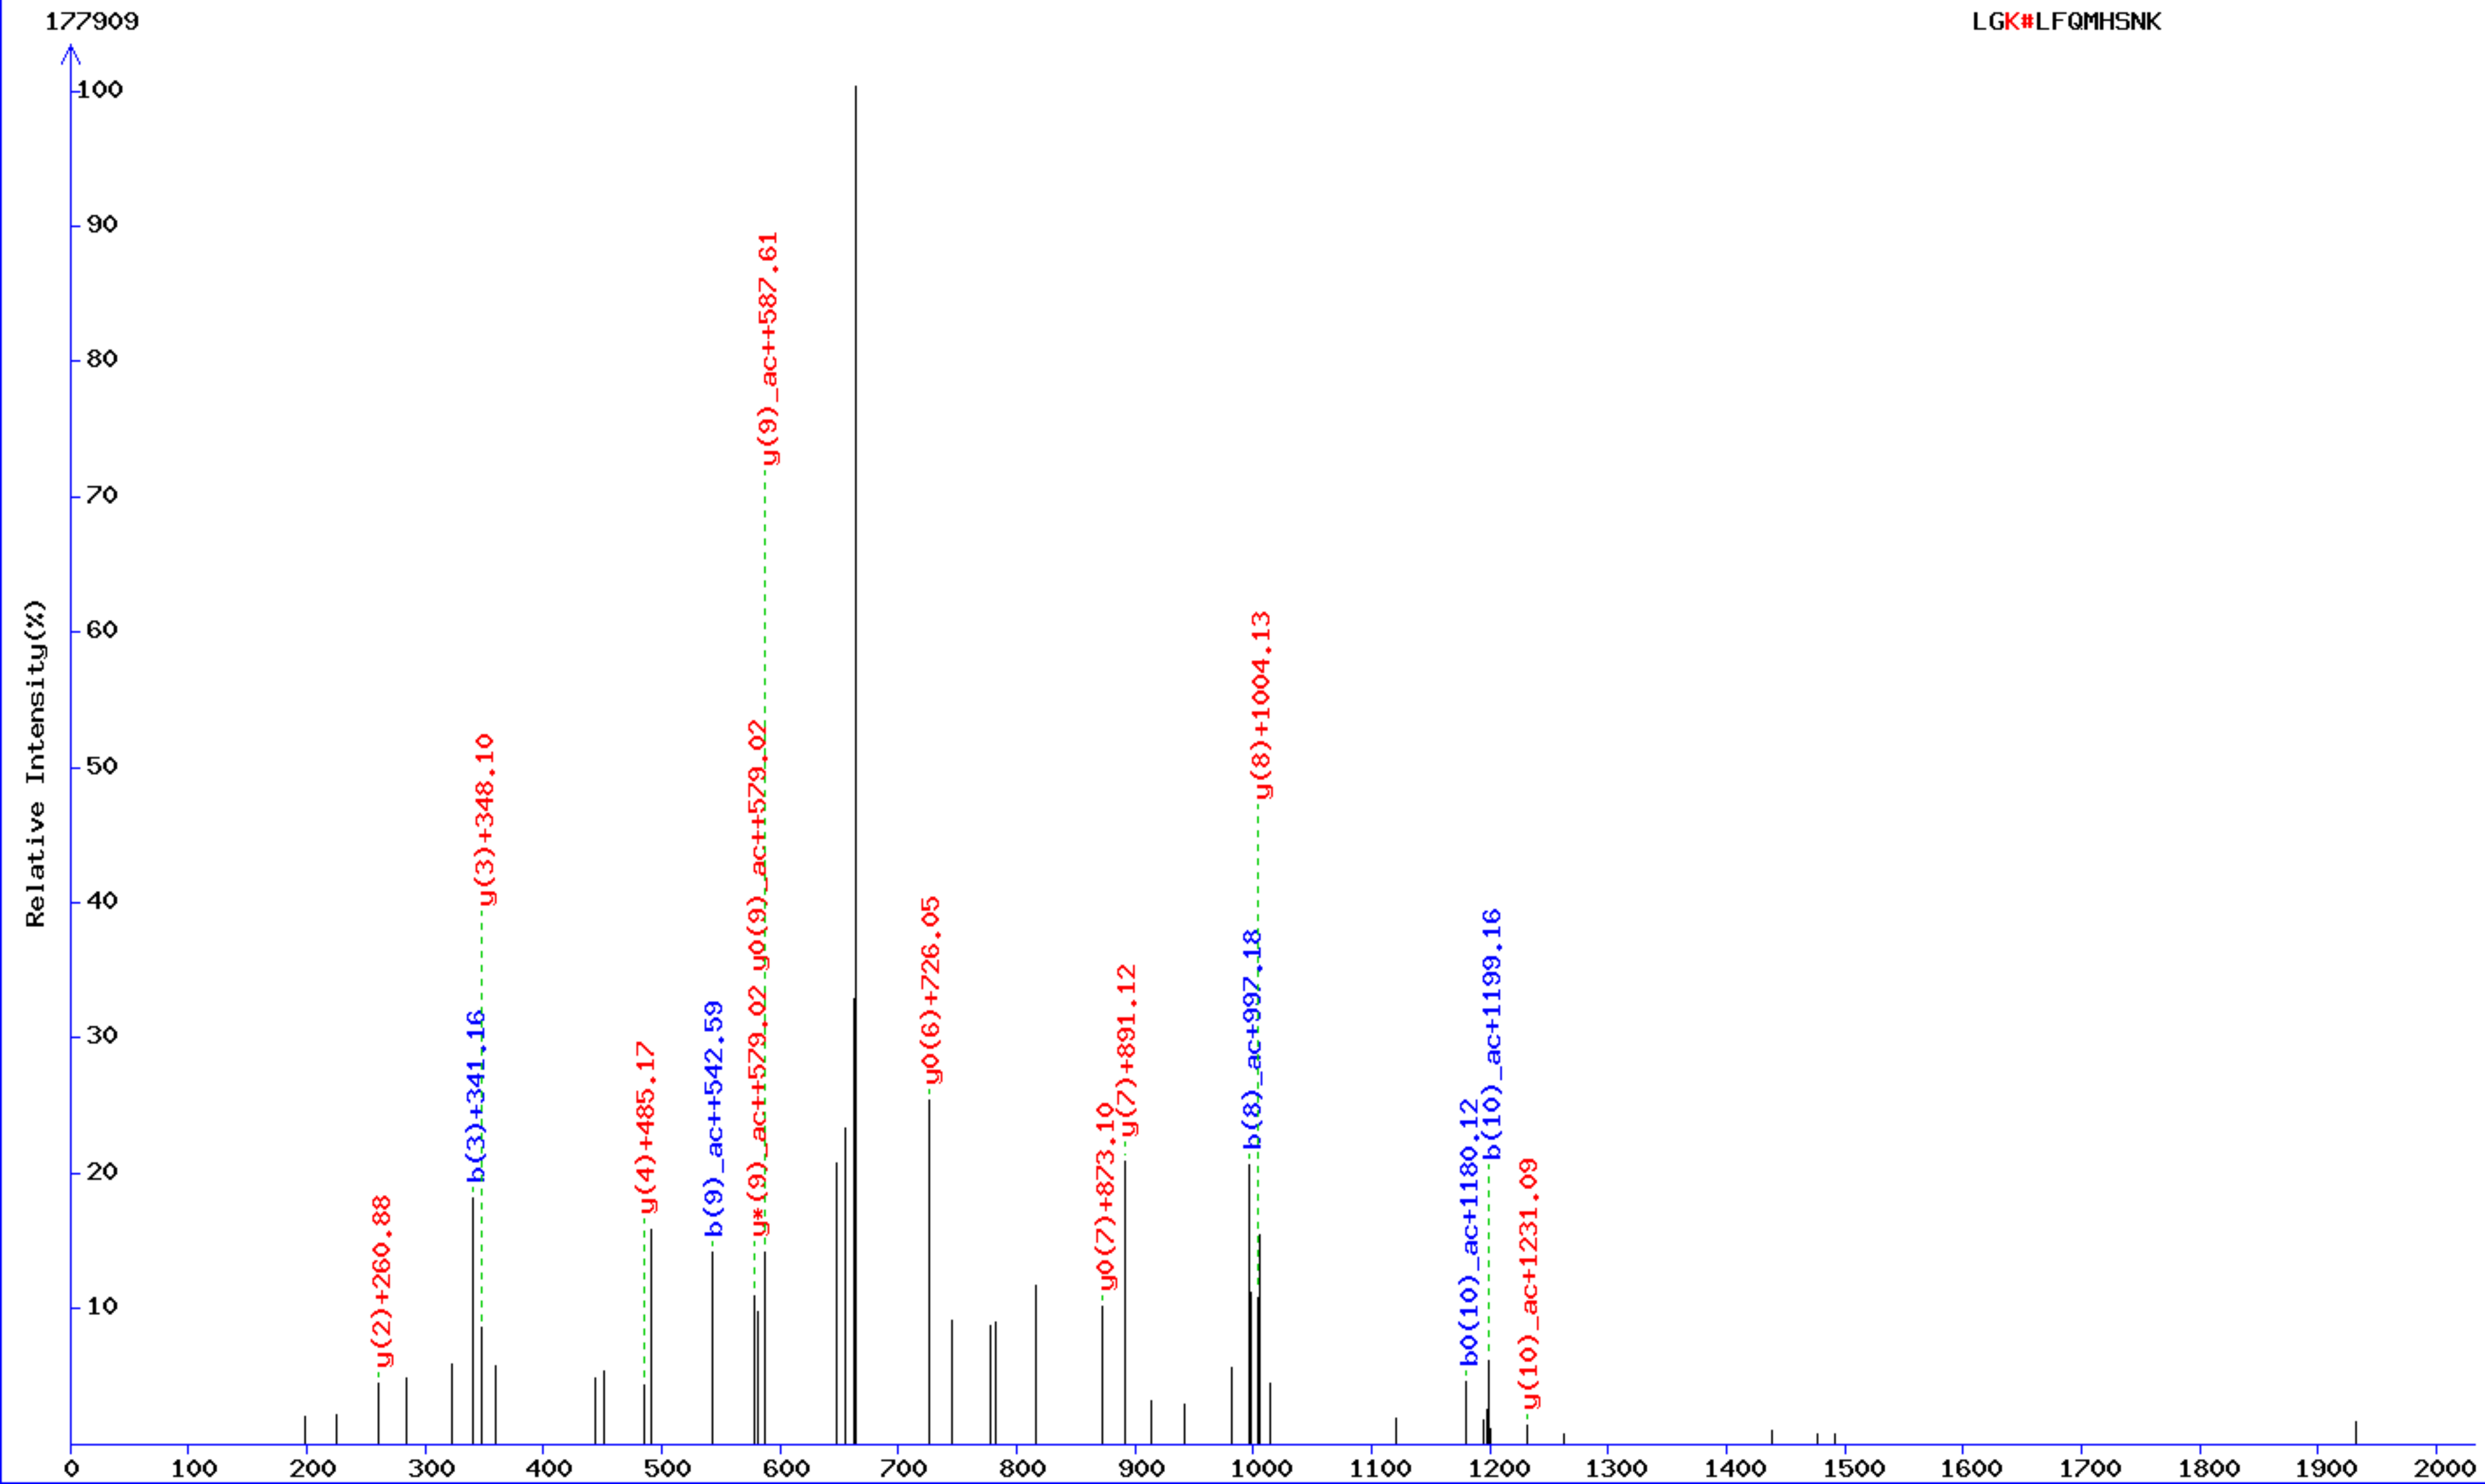

# gi|148659826 MRA\_0068 isocitrate dehydrogenase (NADP) Icd2

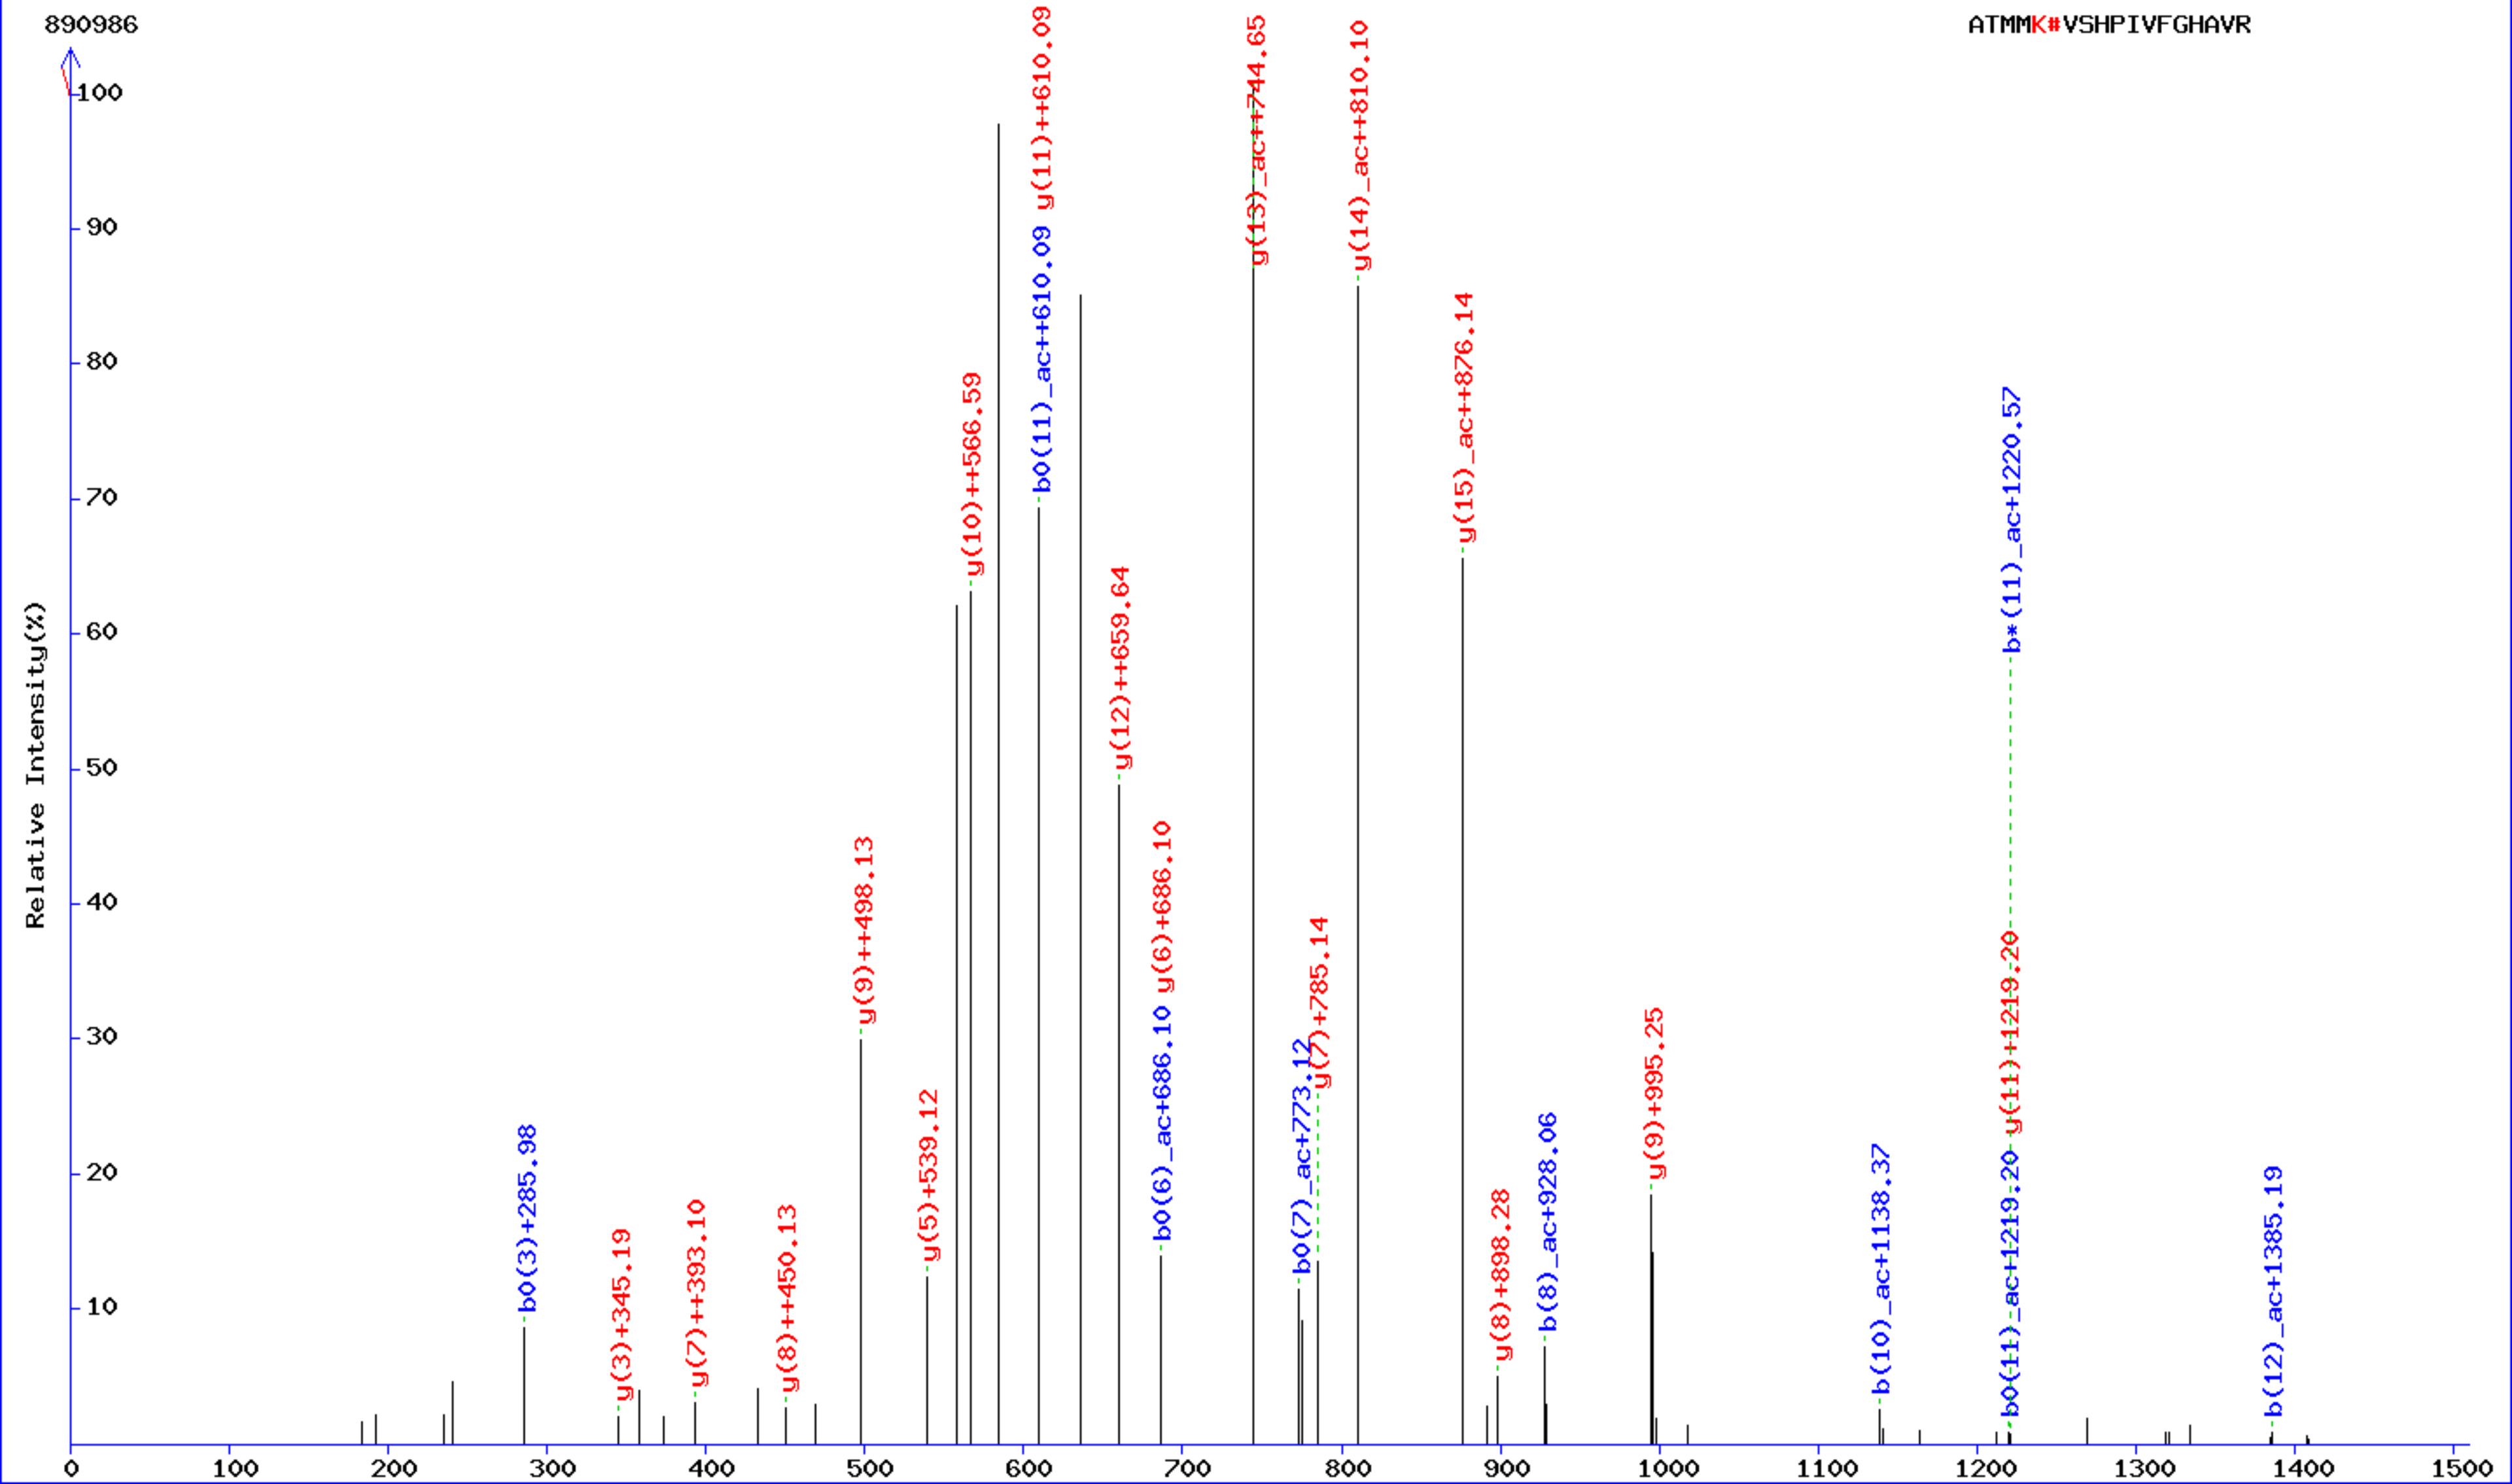

# gi|148663669 MRA\_3841 long-chain-fatty-acid--CoA ligase

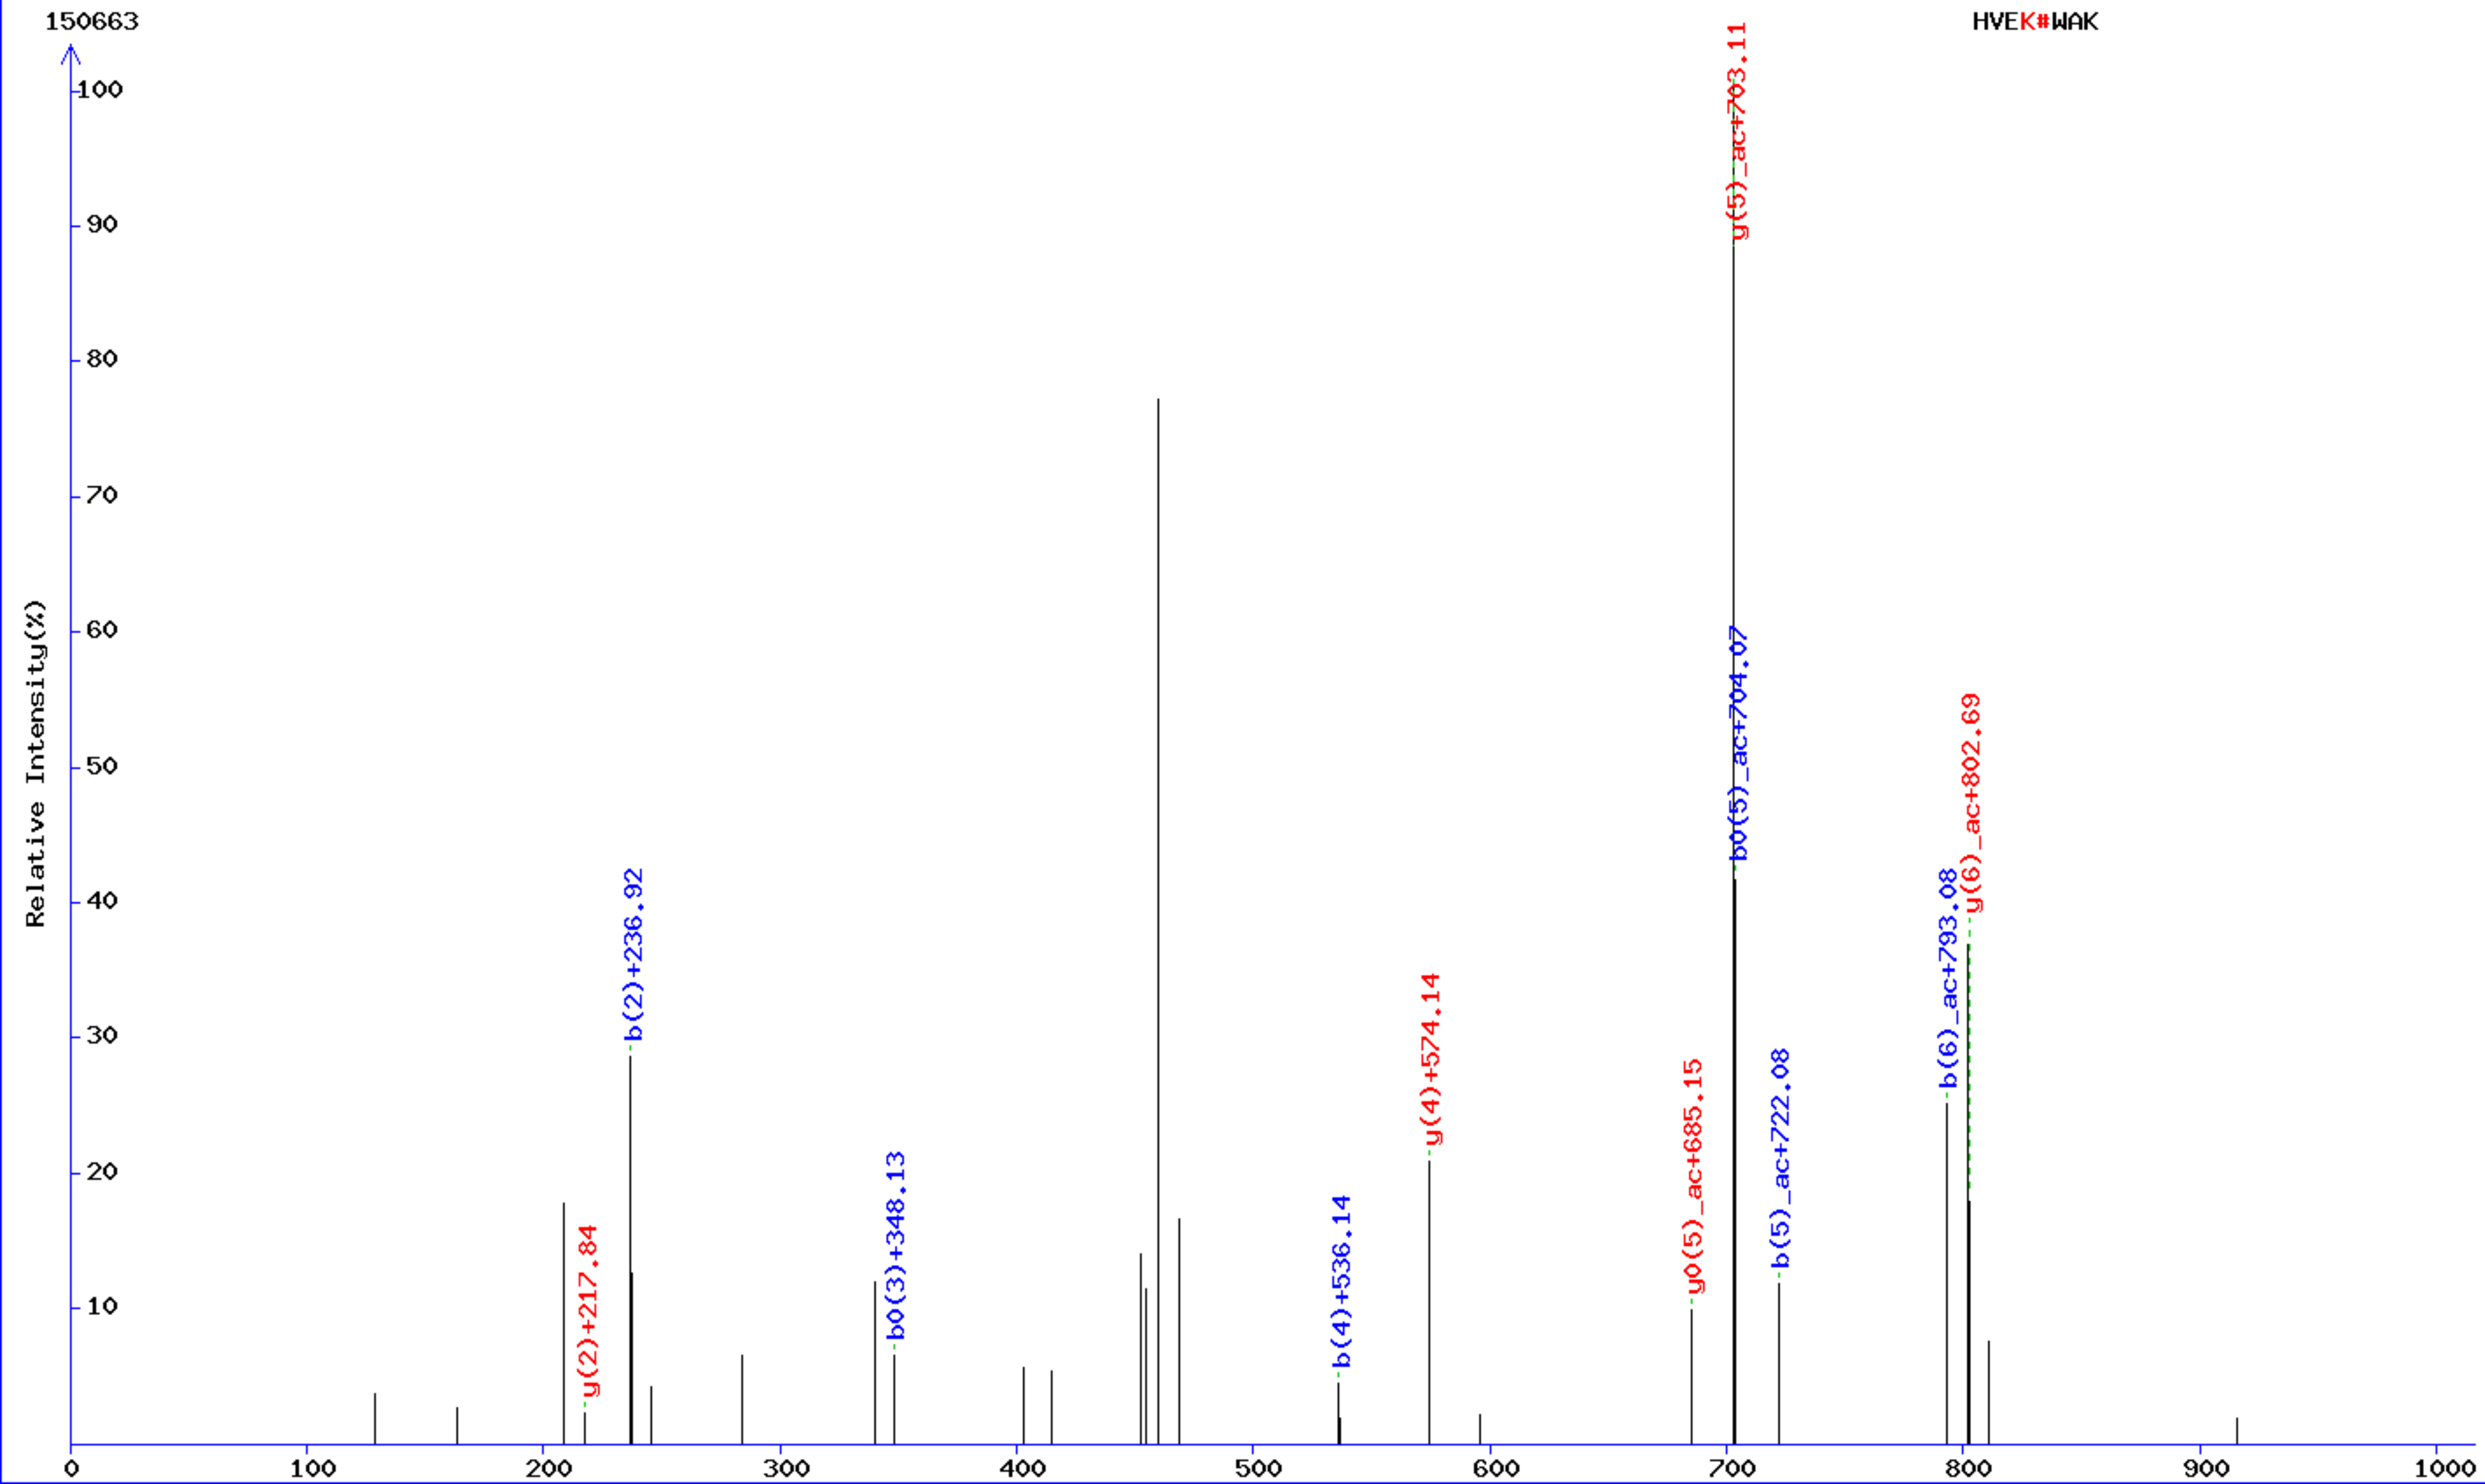

# gi|148660637 MRA\_0868 fatty oxidation complex subunit alpha

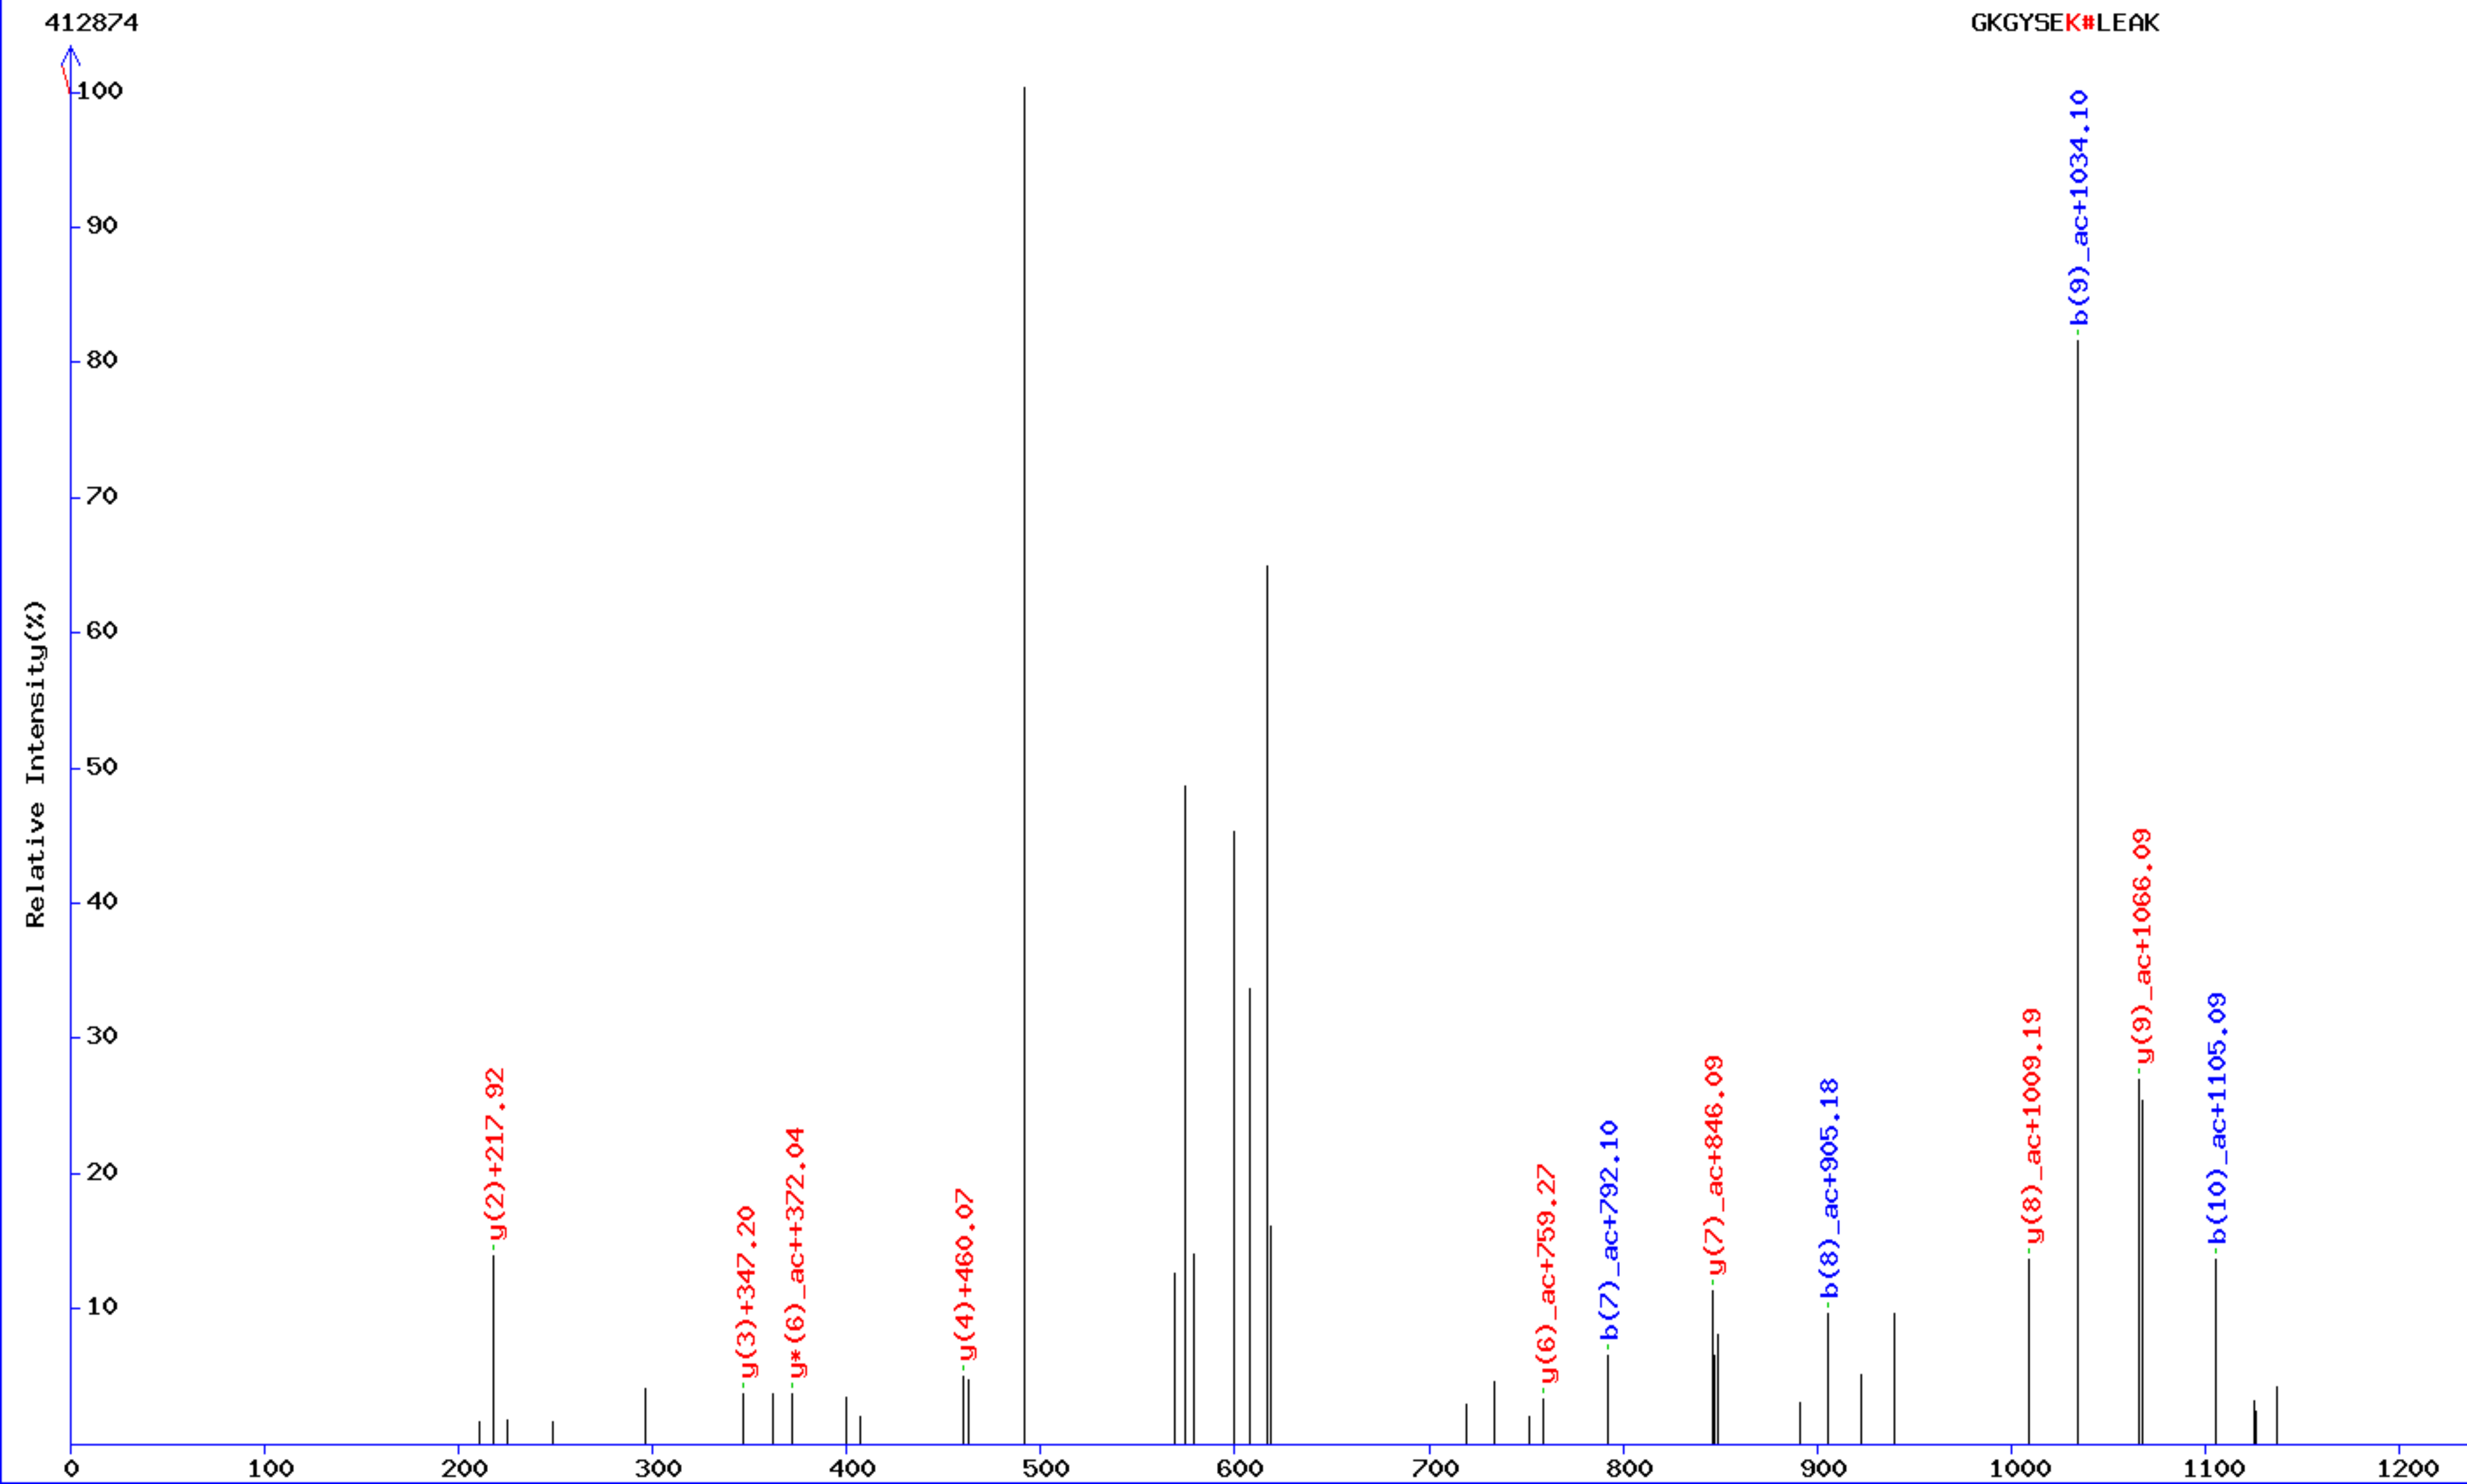

# gi|148660205 MRA\_0445 molecular chaperone GroEL

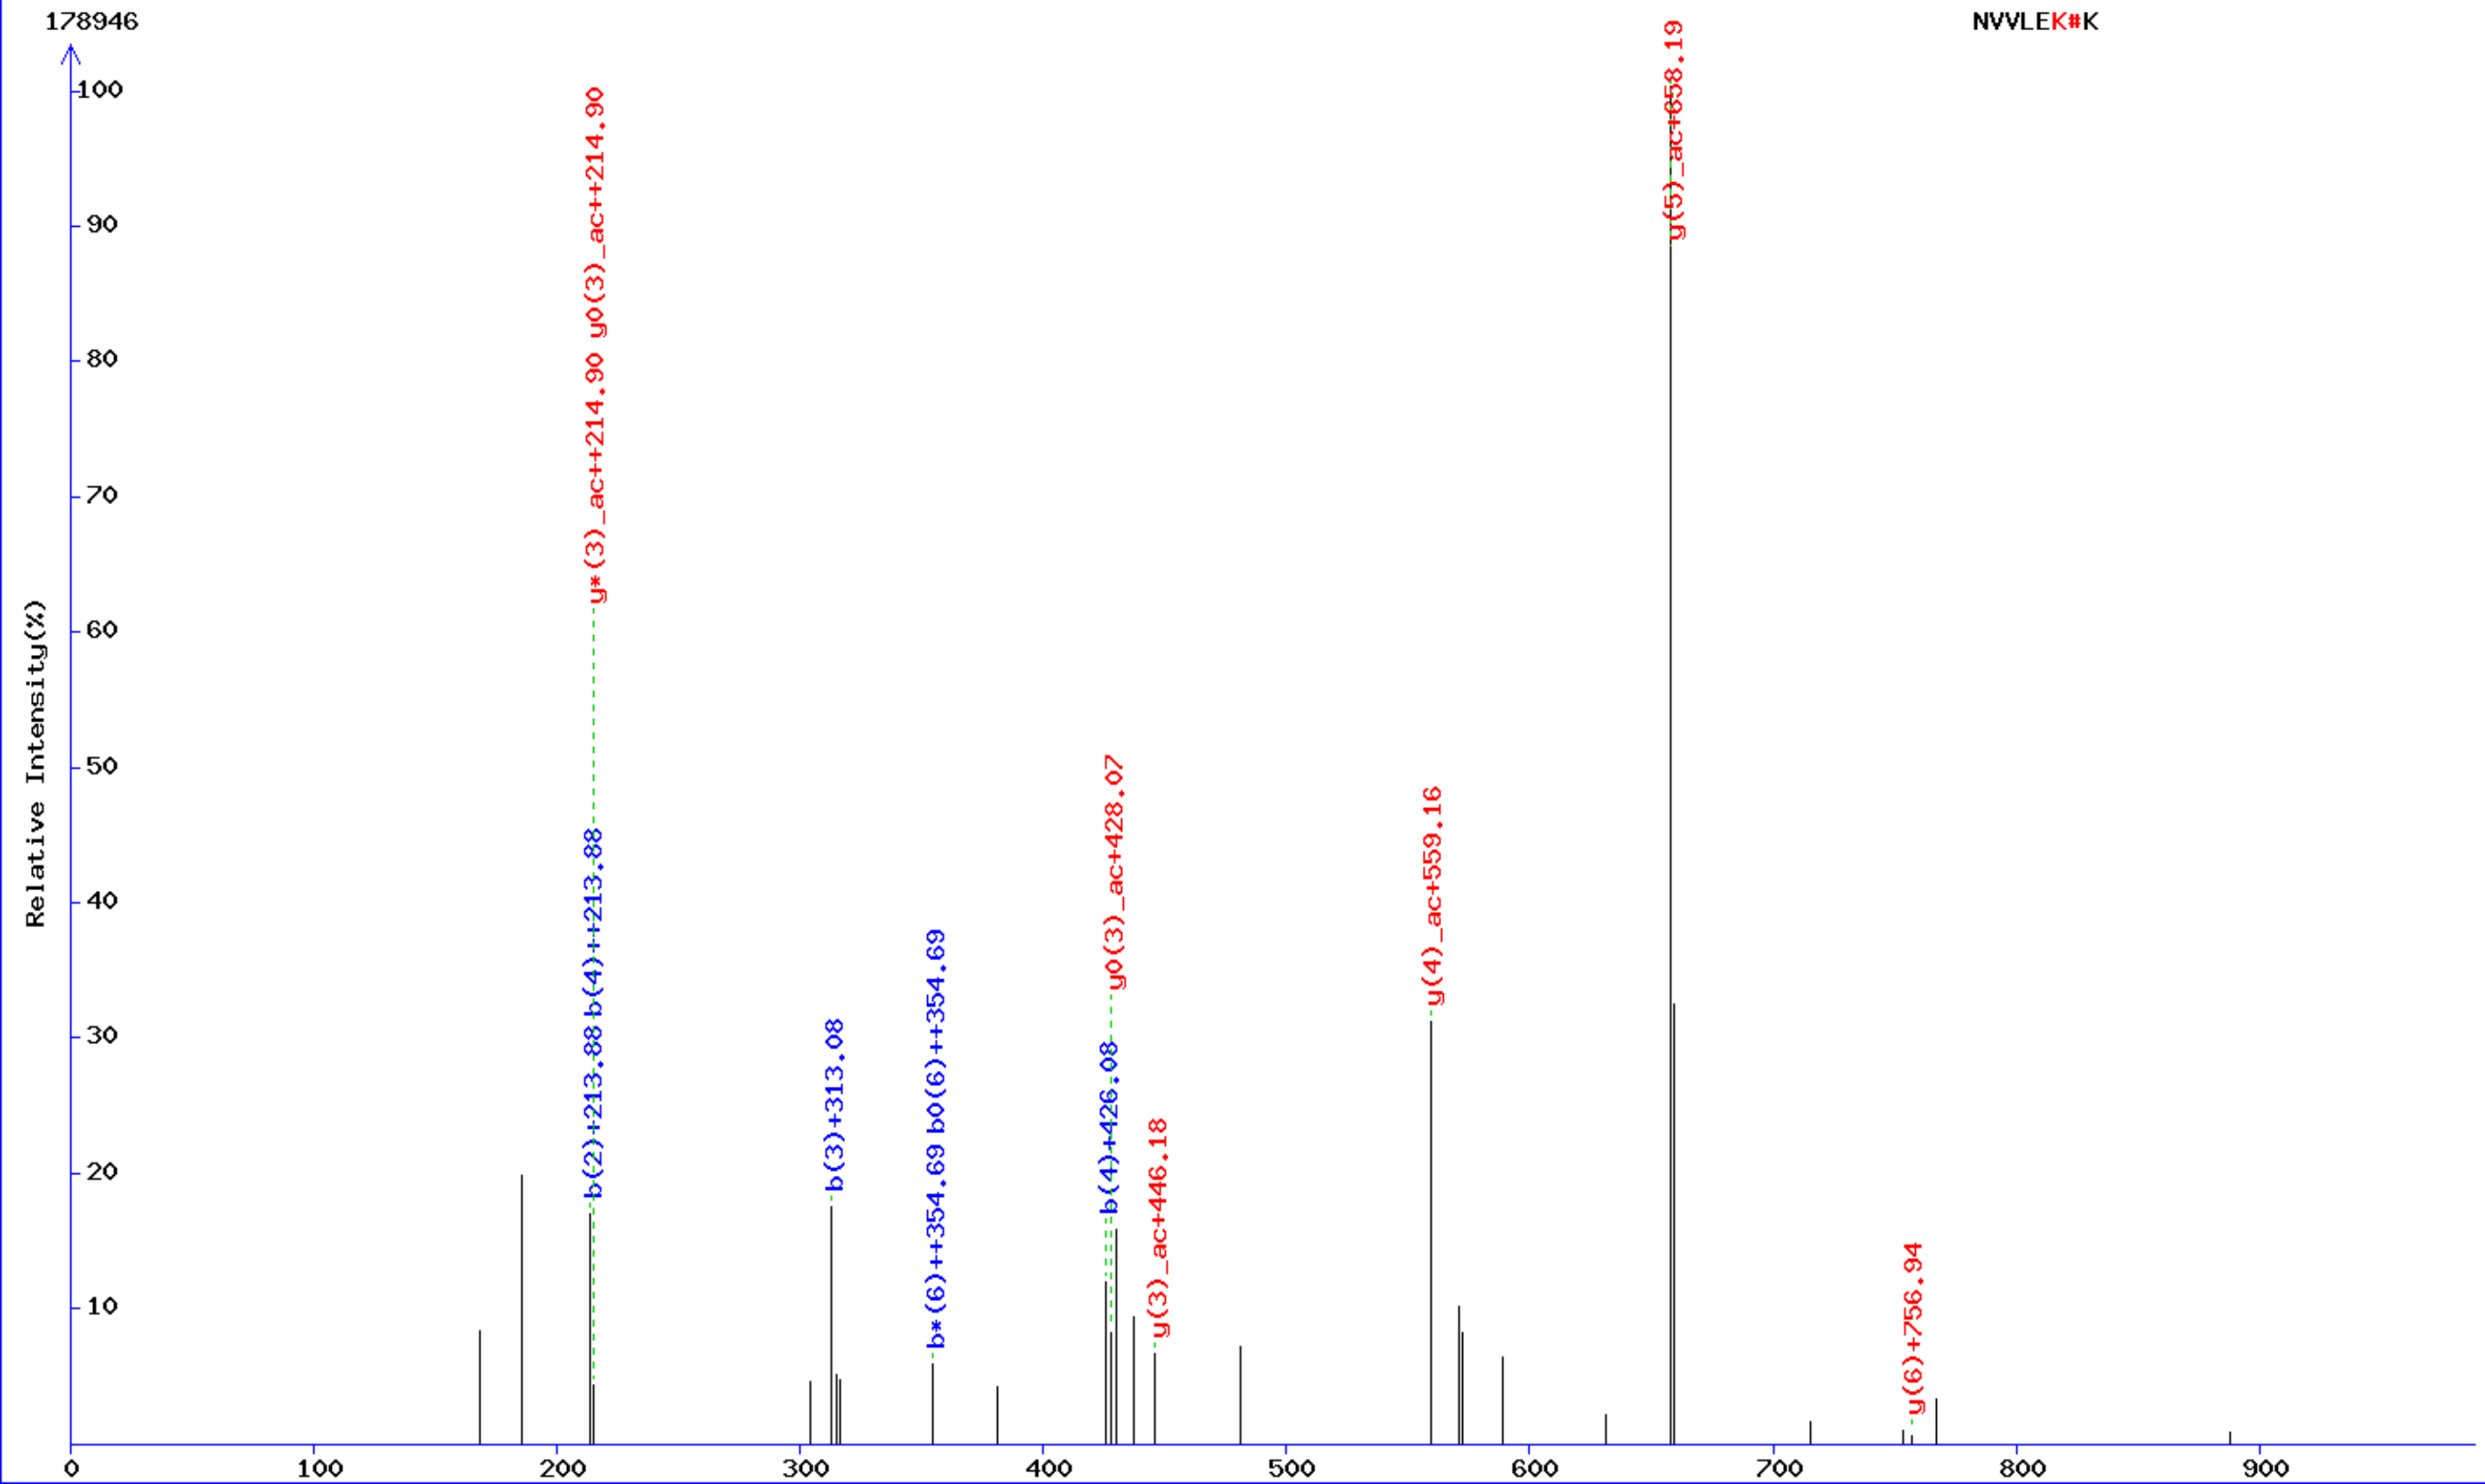

# gi|148660205 MRA\_0445 molecular chaperone GroEL

GTFK#SVAVK

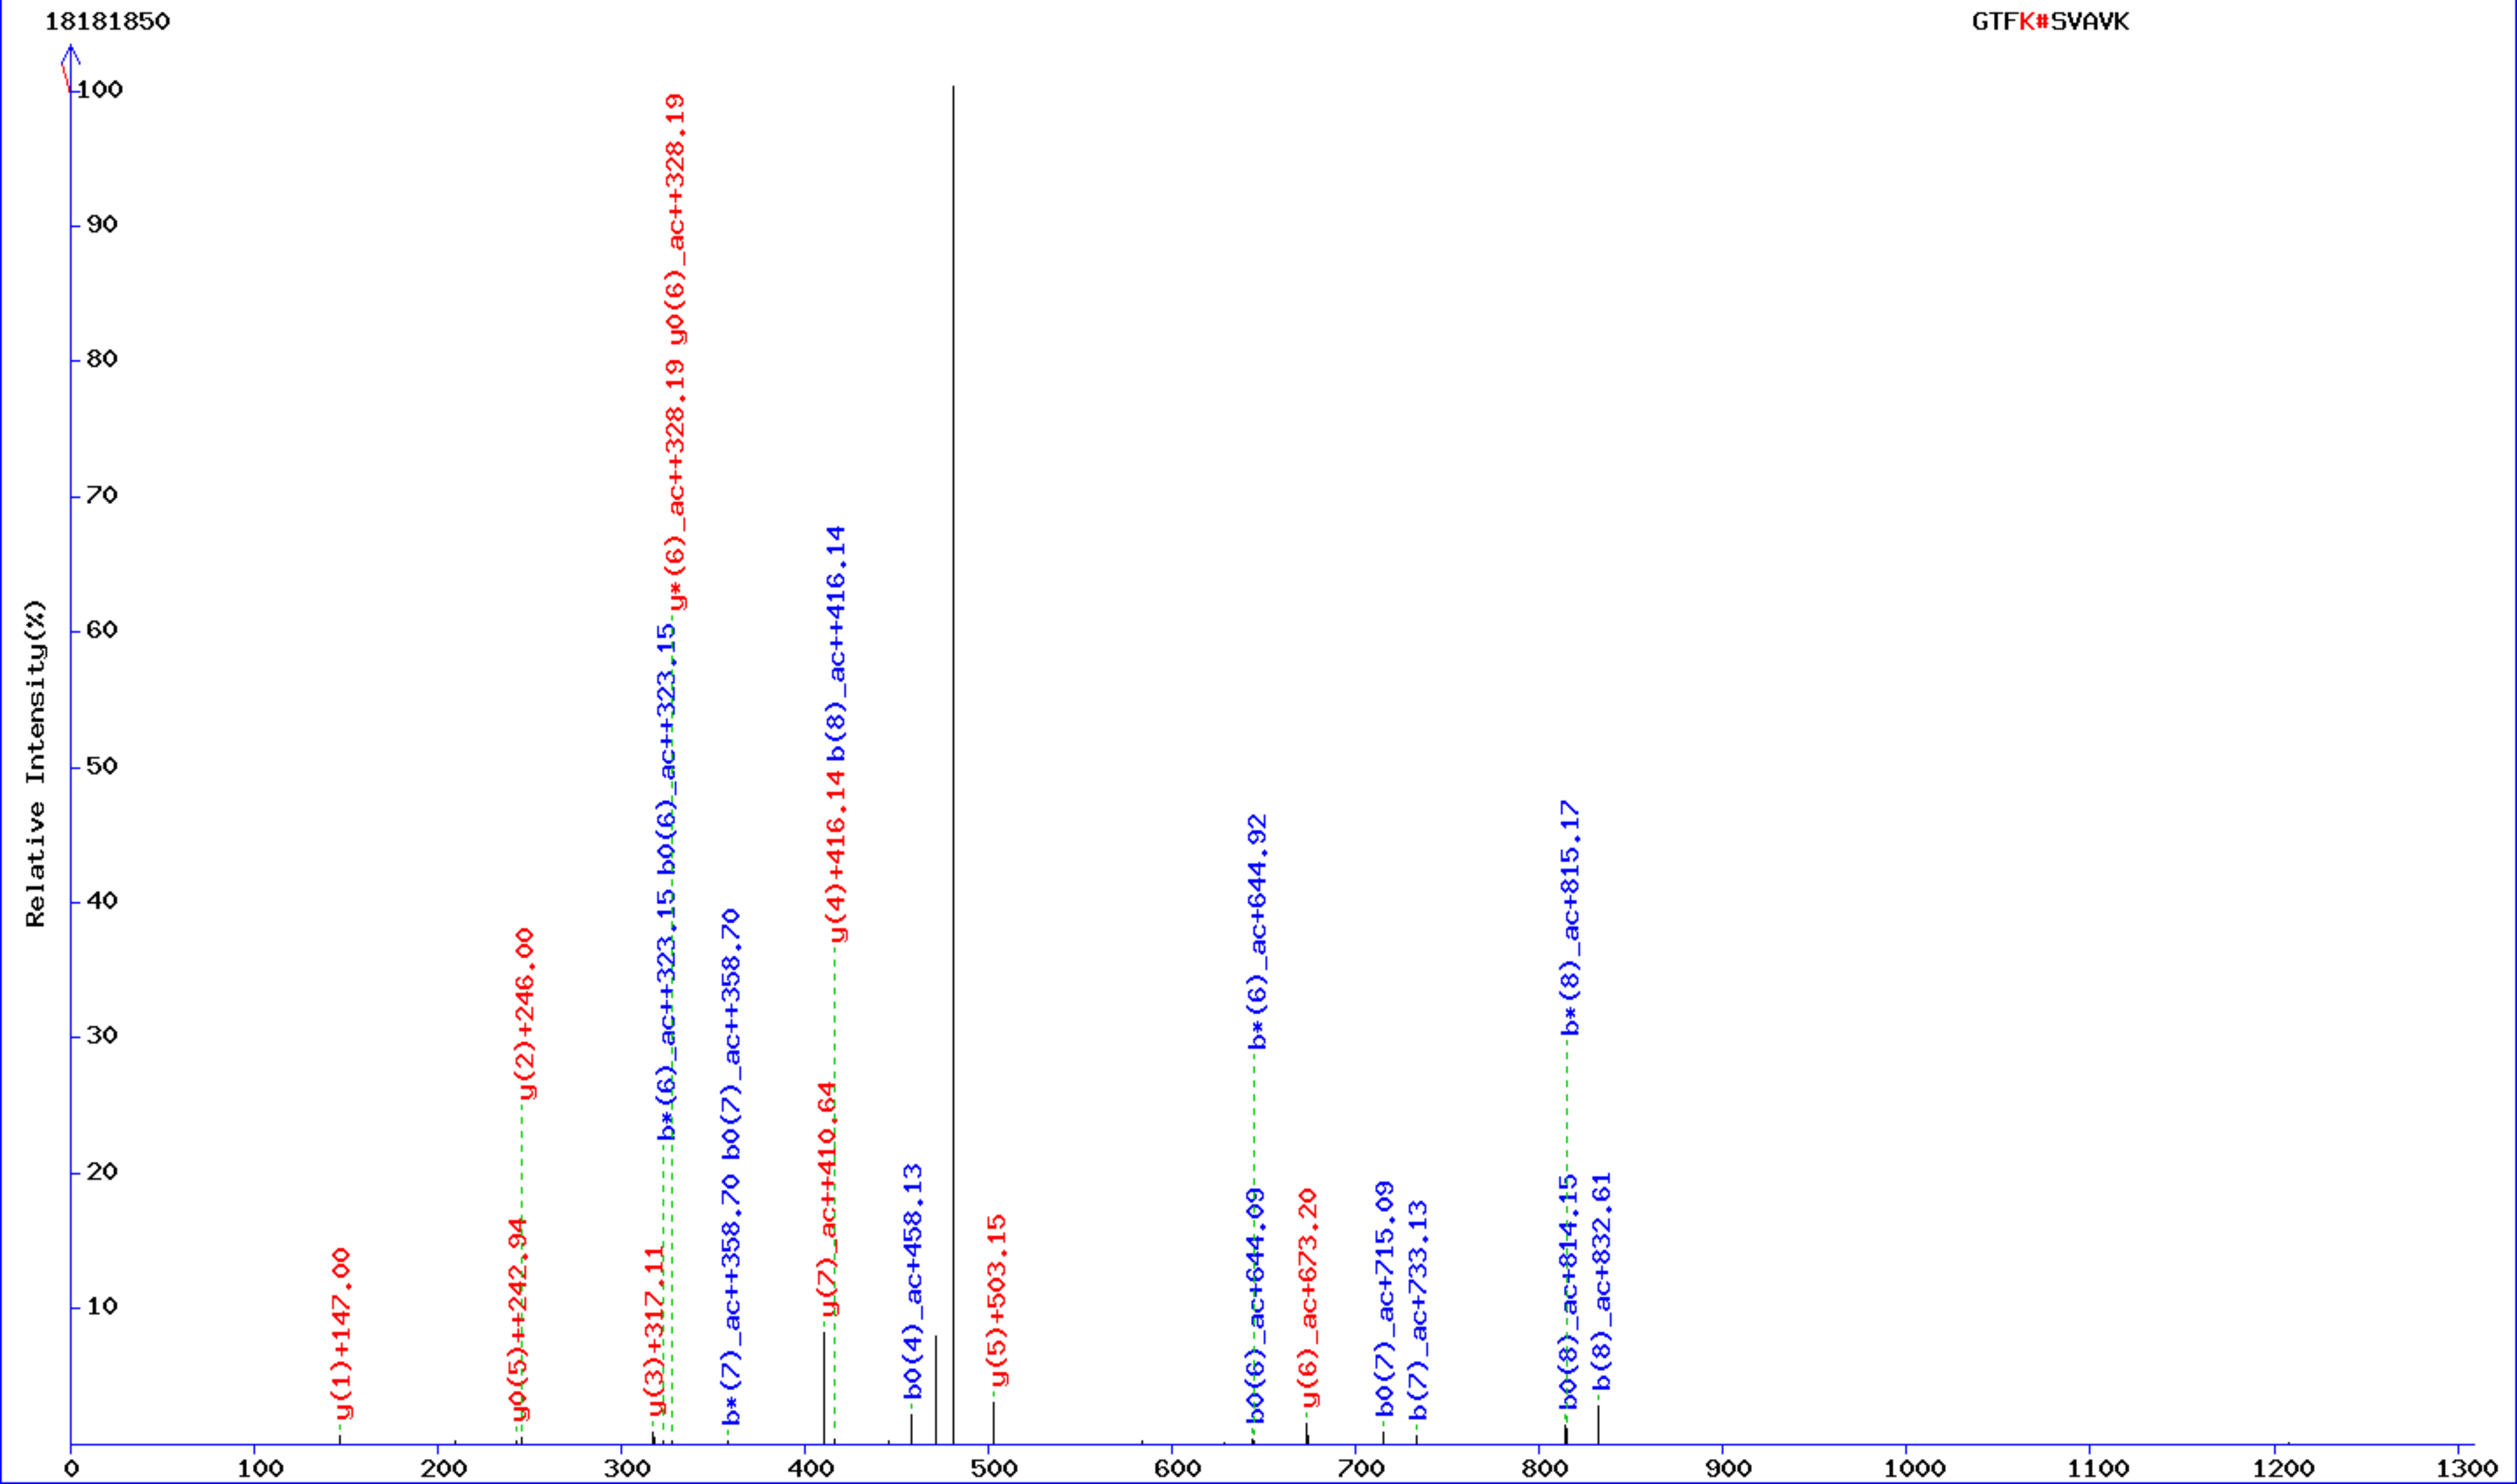



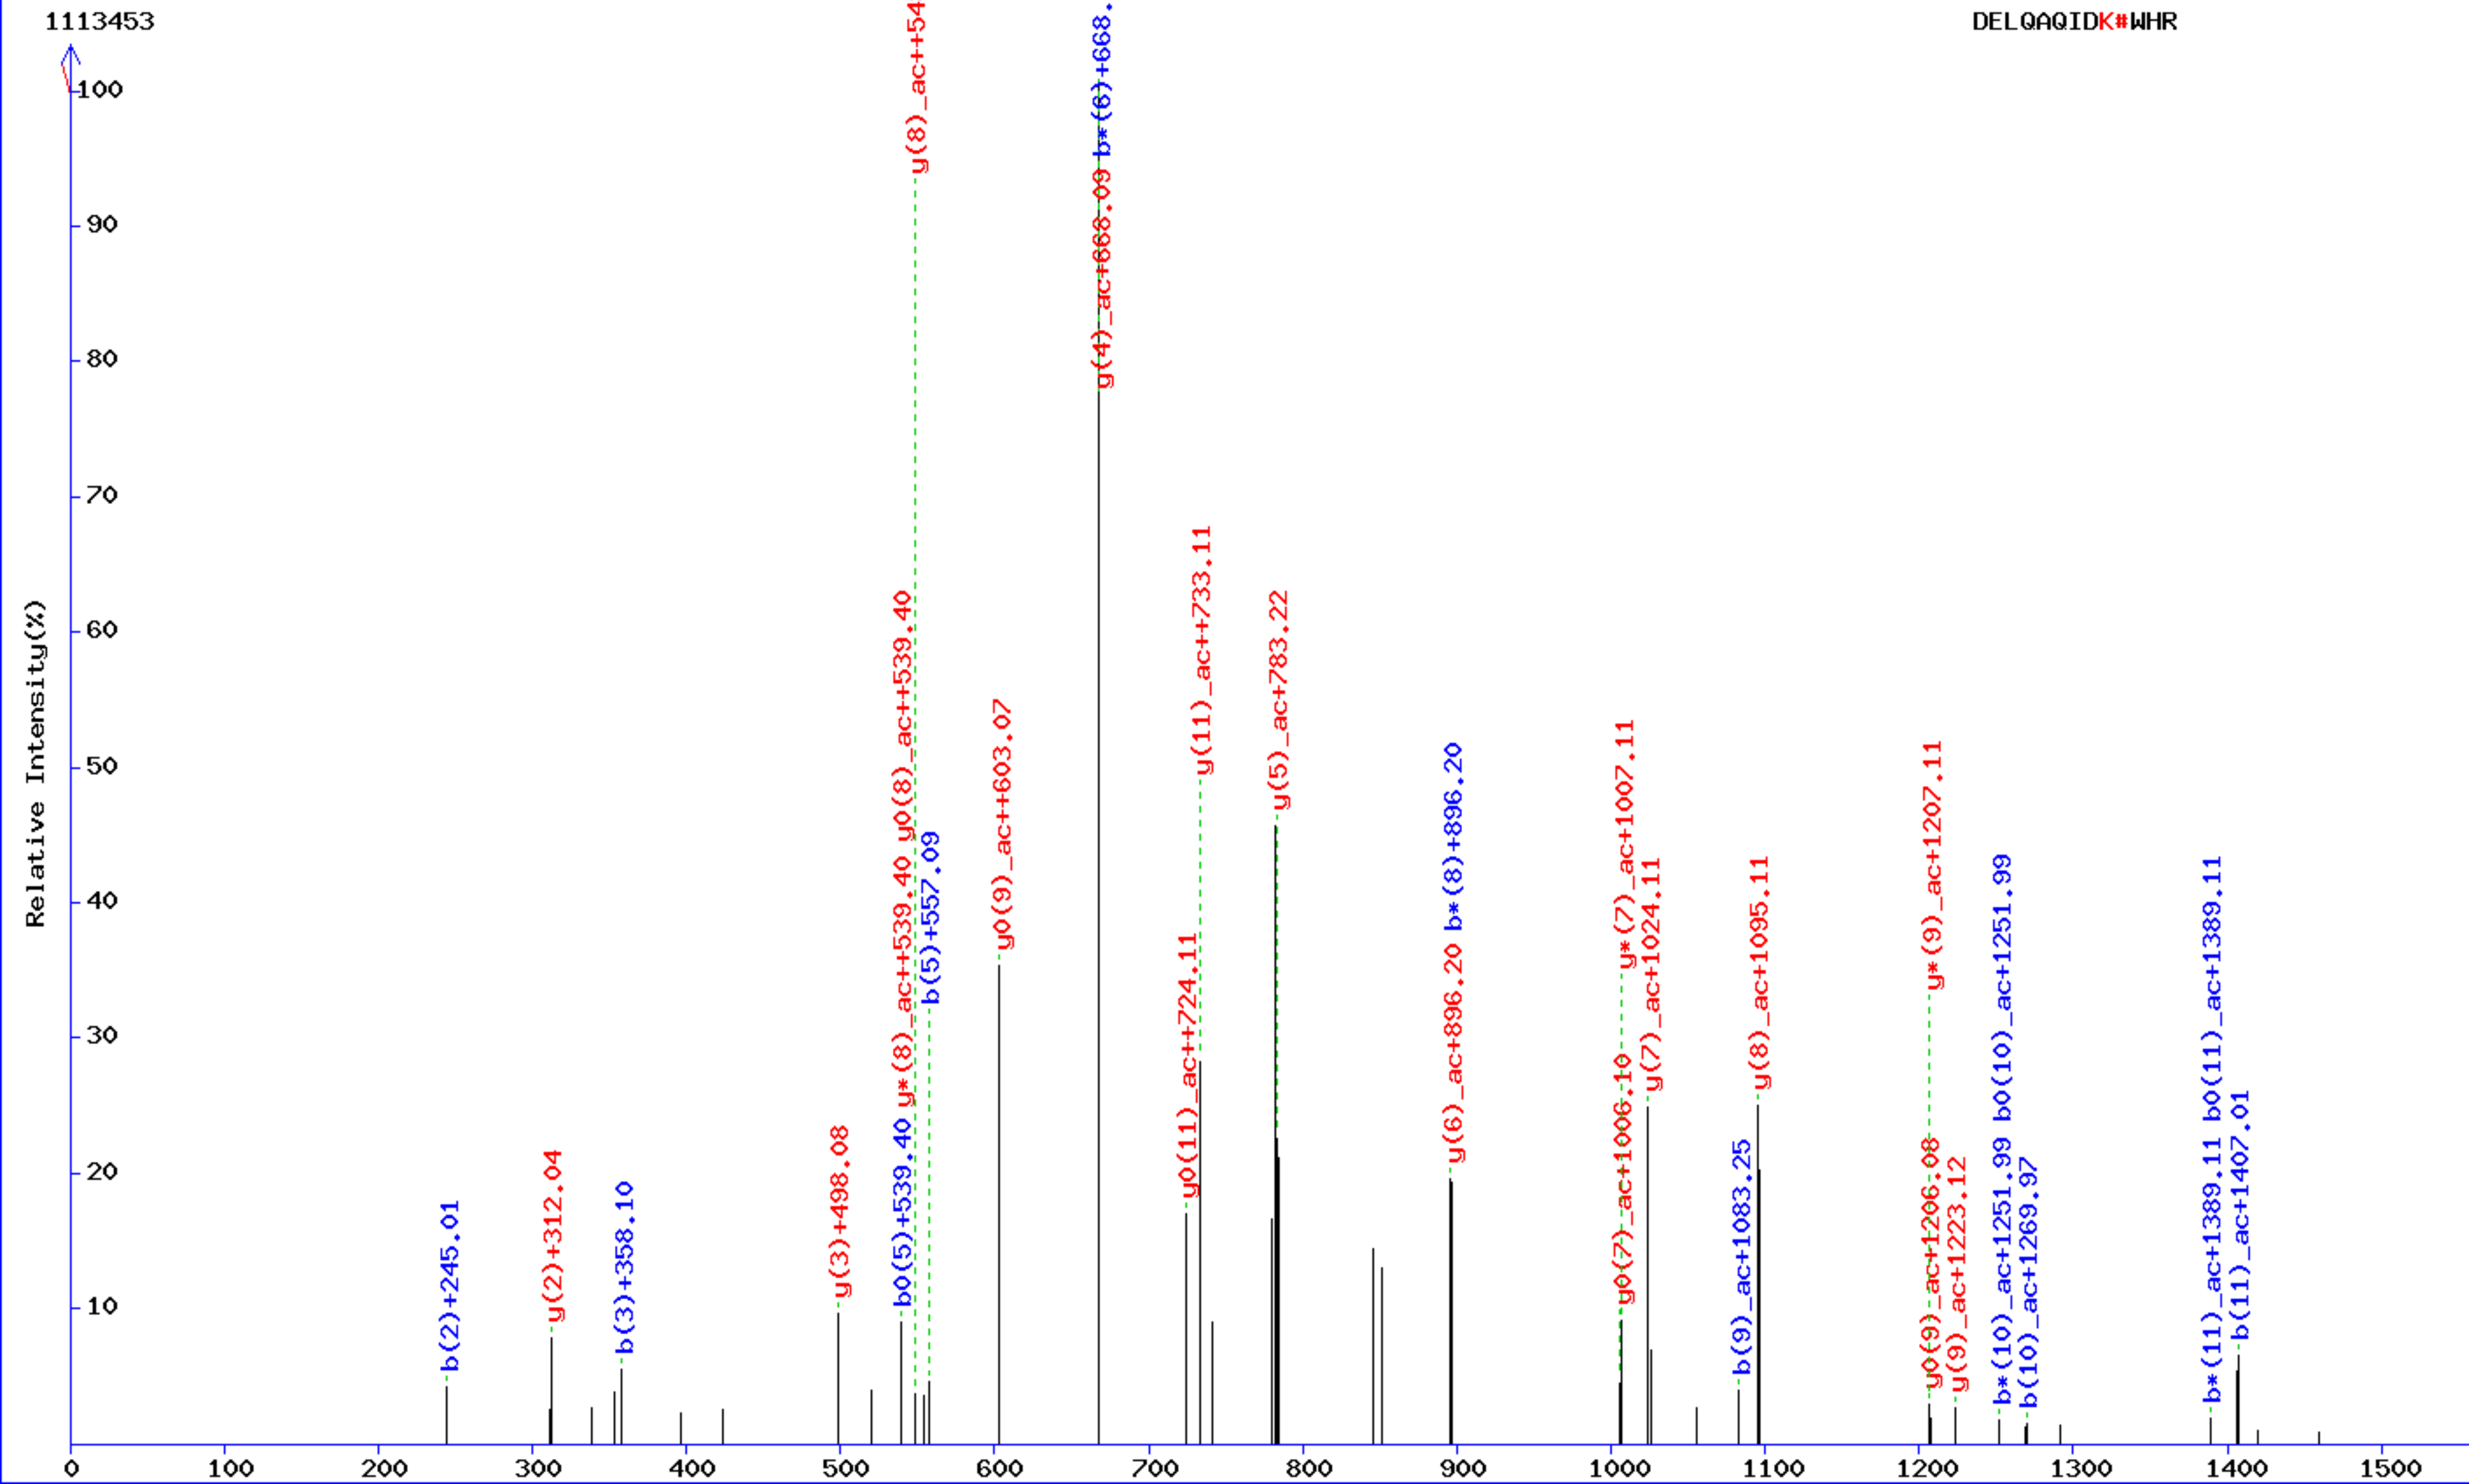

# gi|148663281 MRA\_3457 molecular chaperone GroEL

LAK#LAGGVAVIK

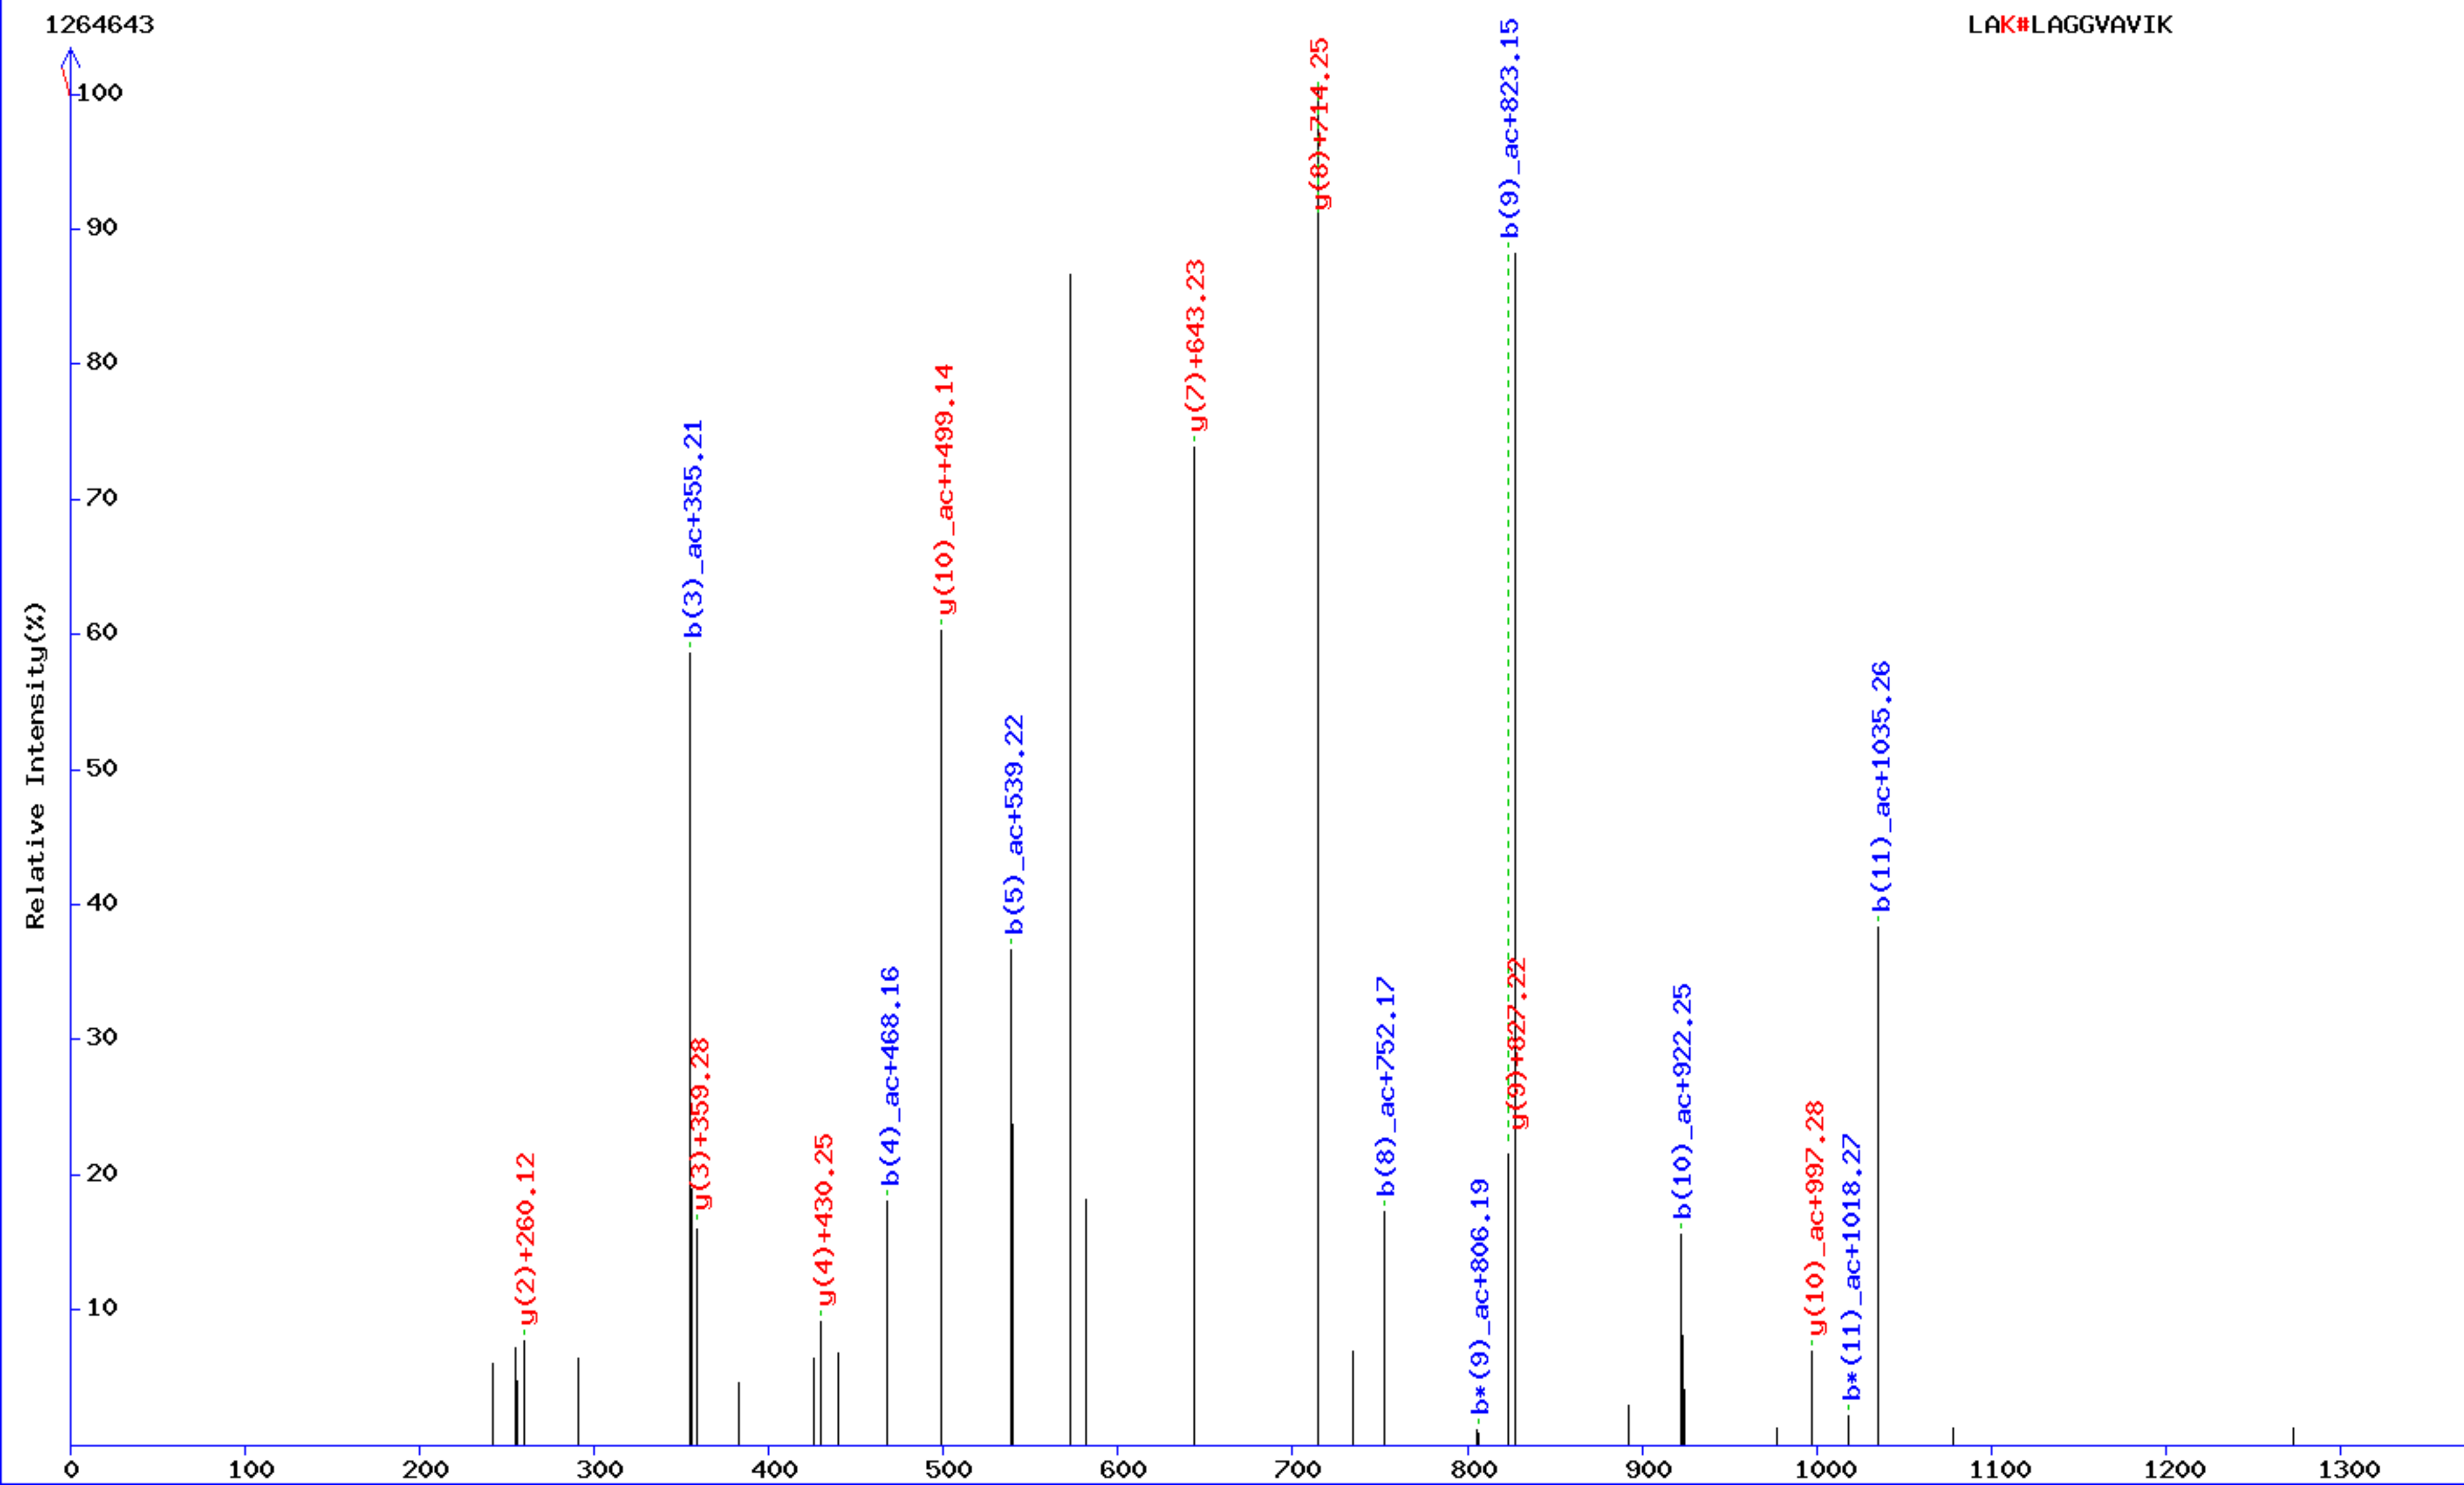

# gi|148660036 MRA\_0279 acyl-CoA dehydrogenase

LPGK#WGEYLLASR

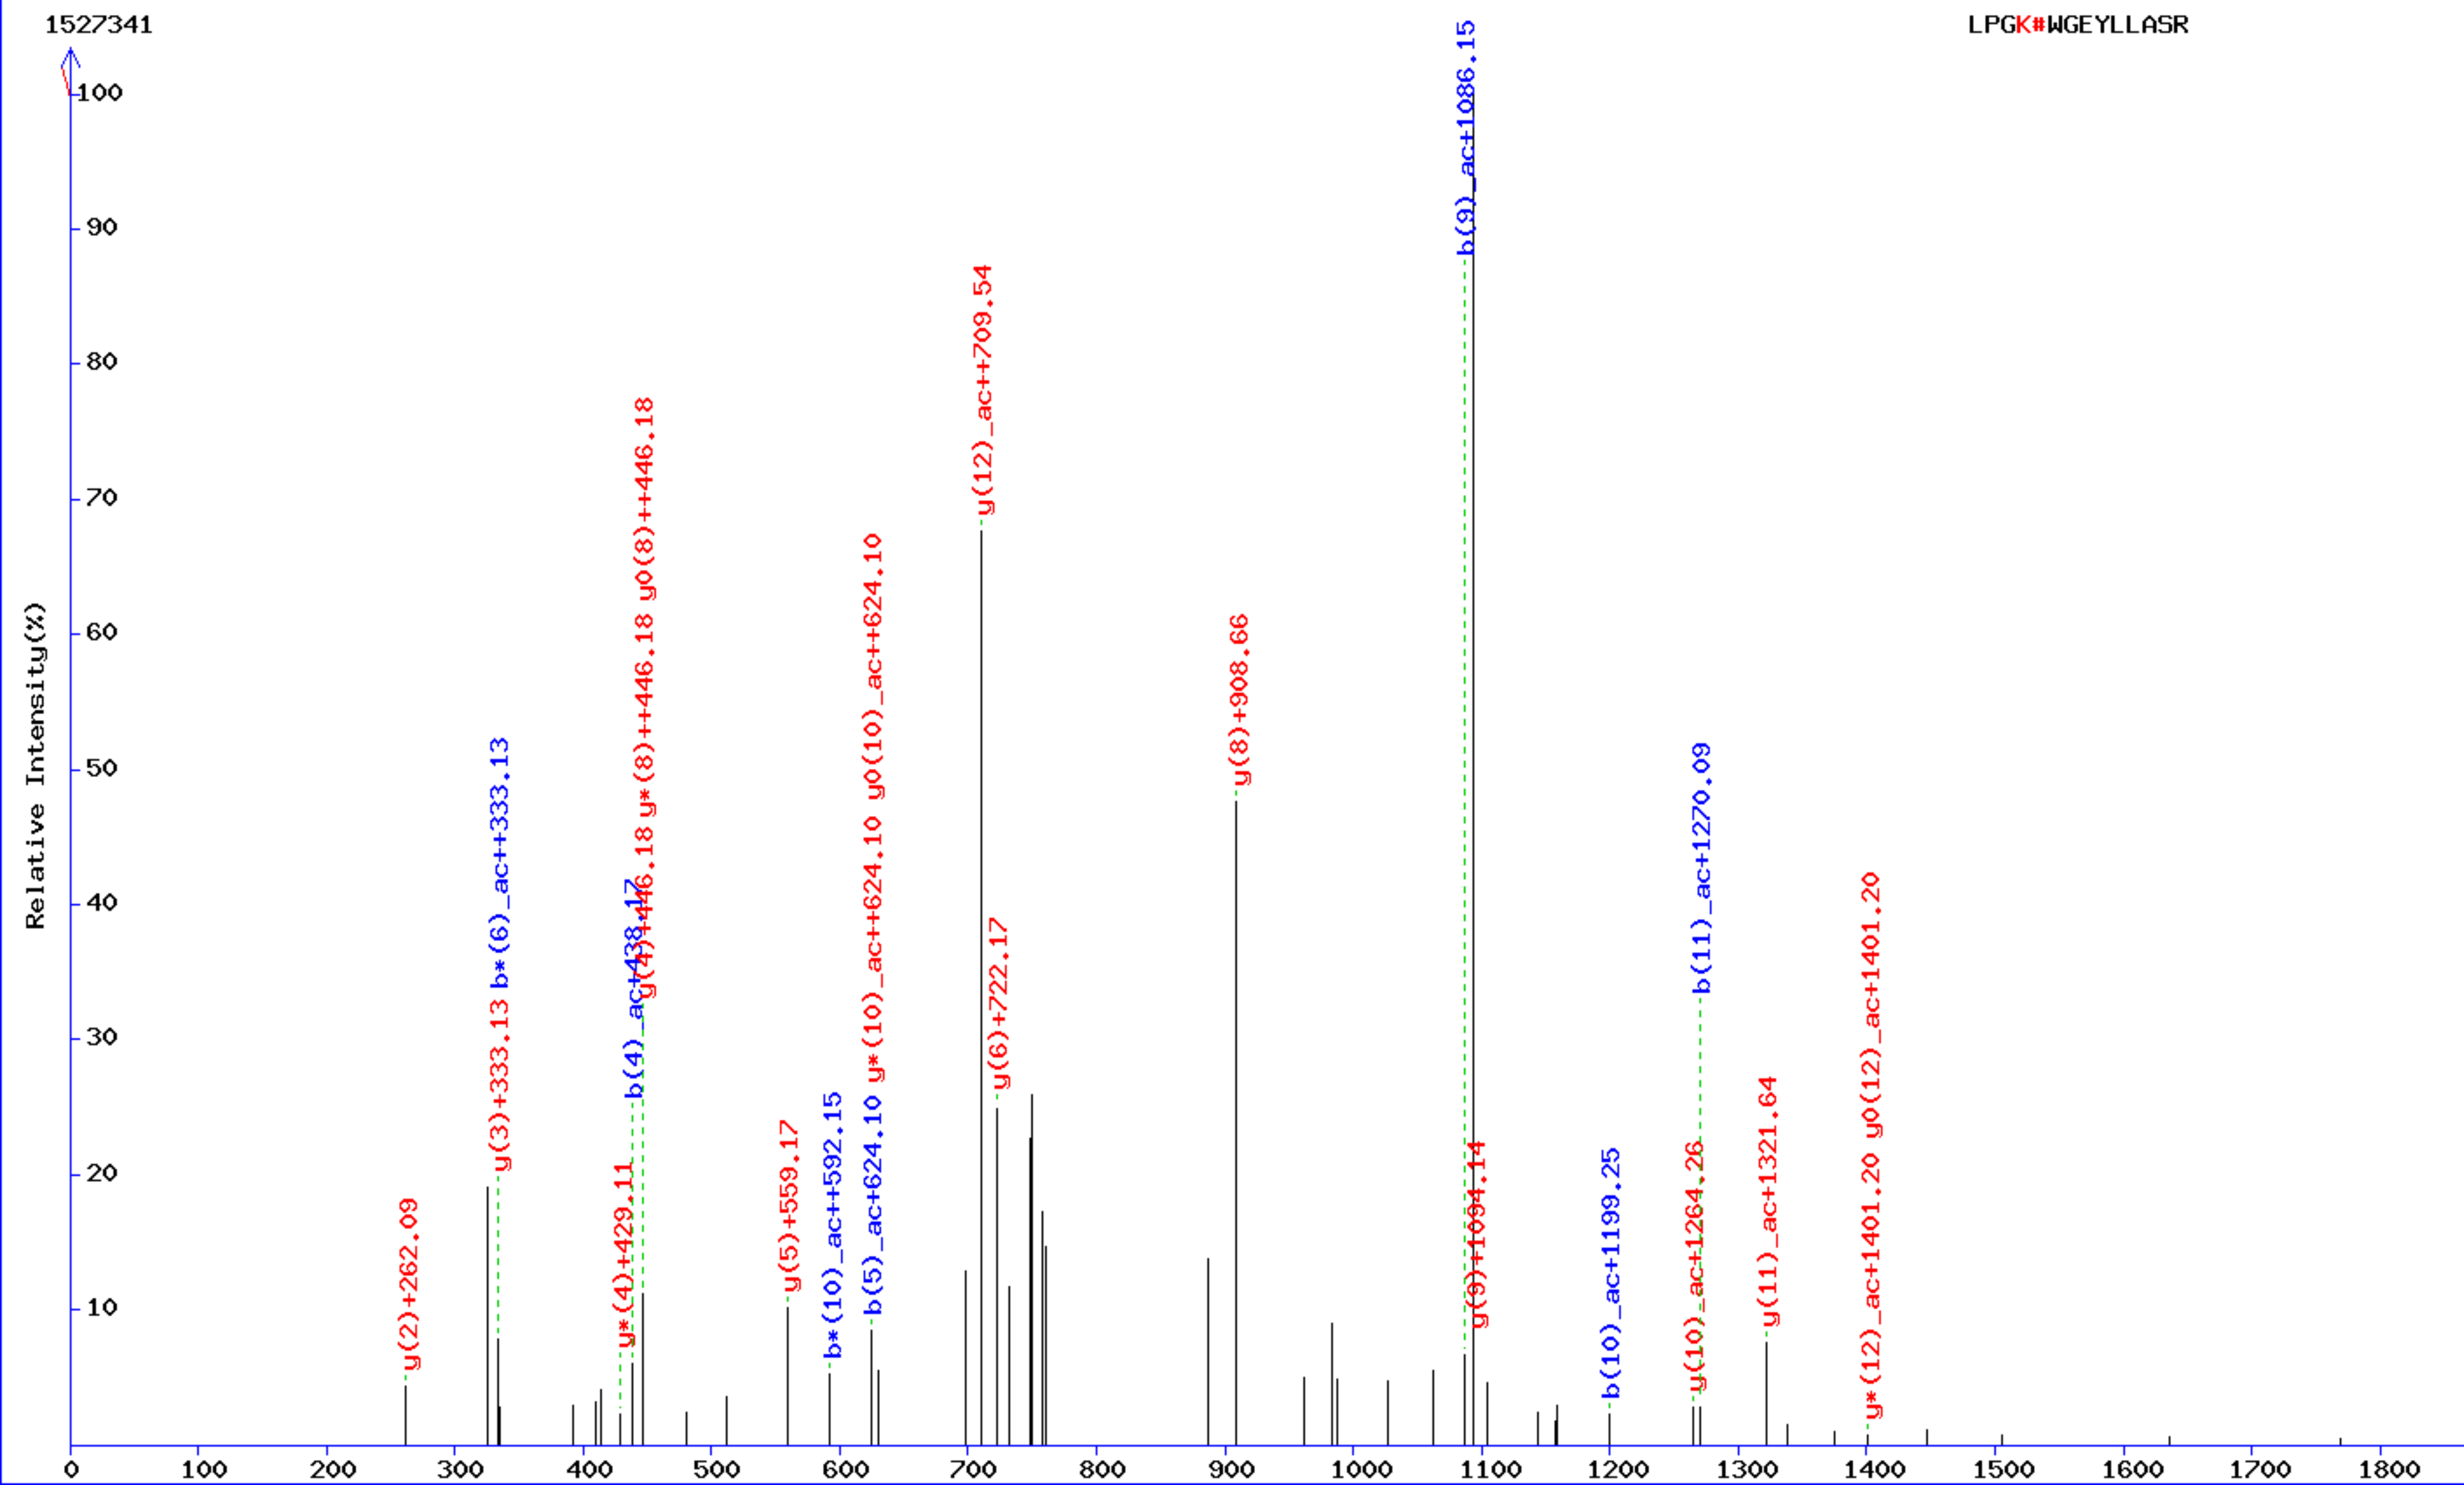

gi|148660205 MRA\_0445 molecular chaperone GroEL

VVVK#DETTIVEGAGDTDIAGR

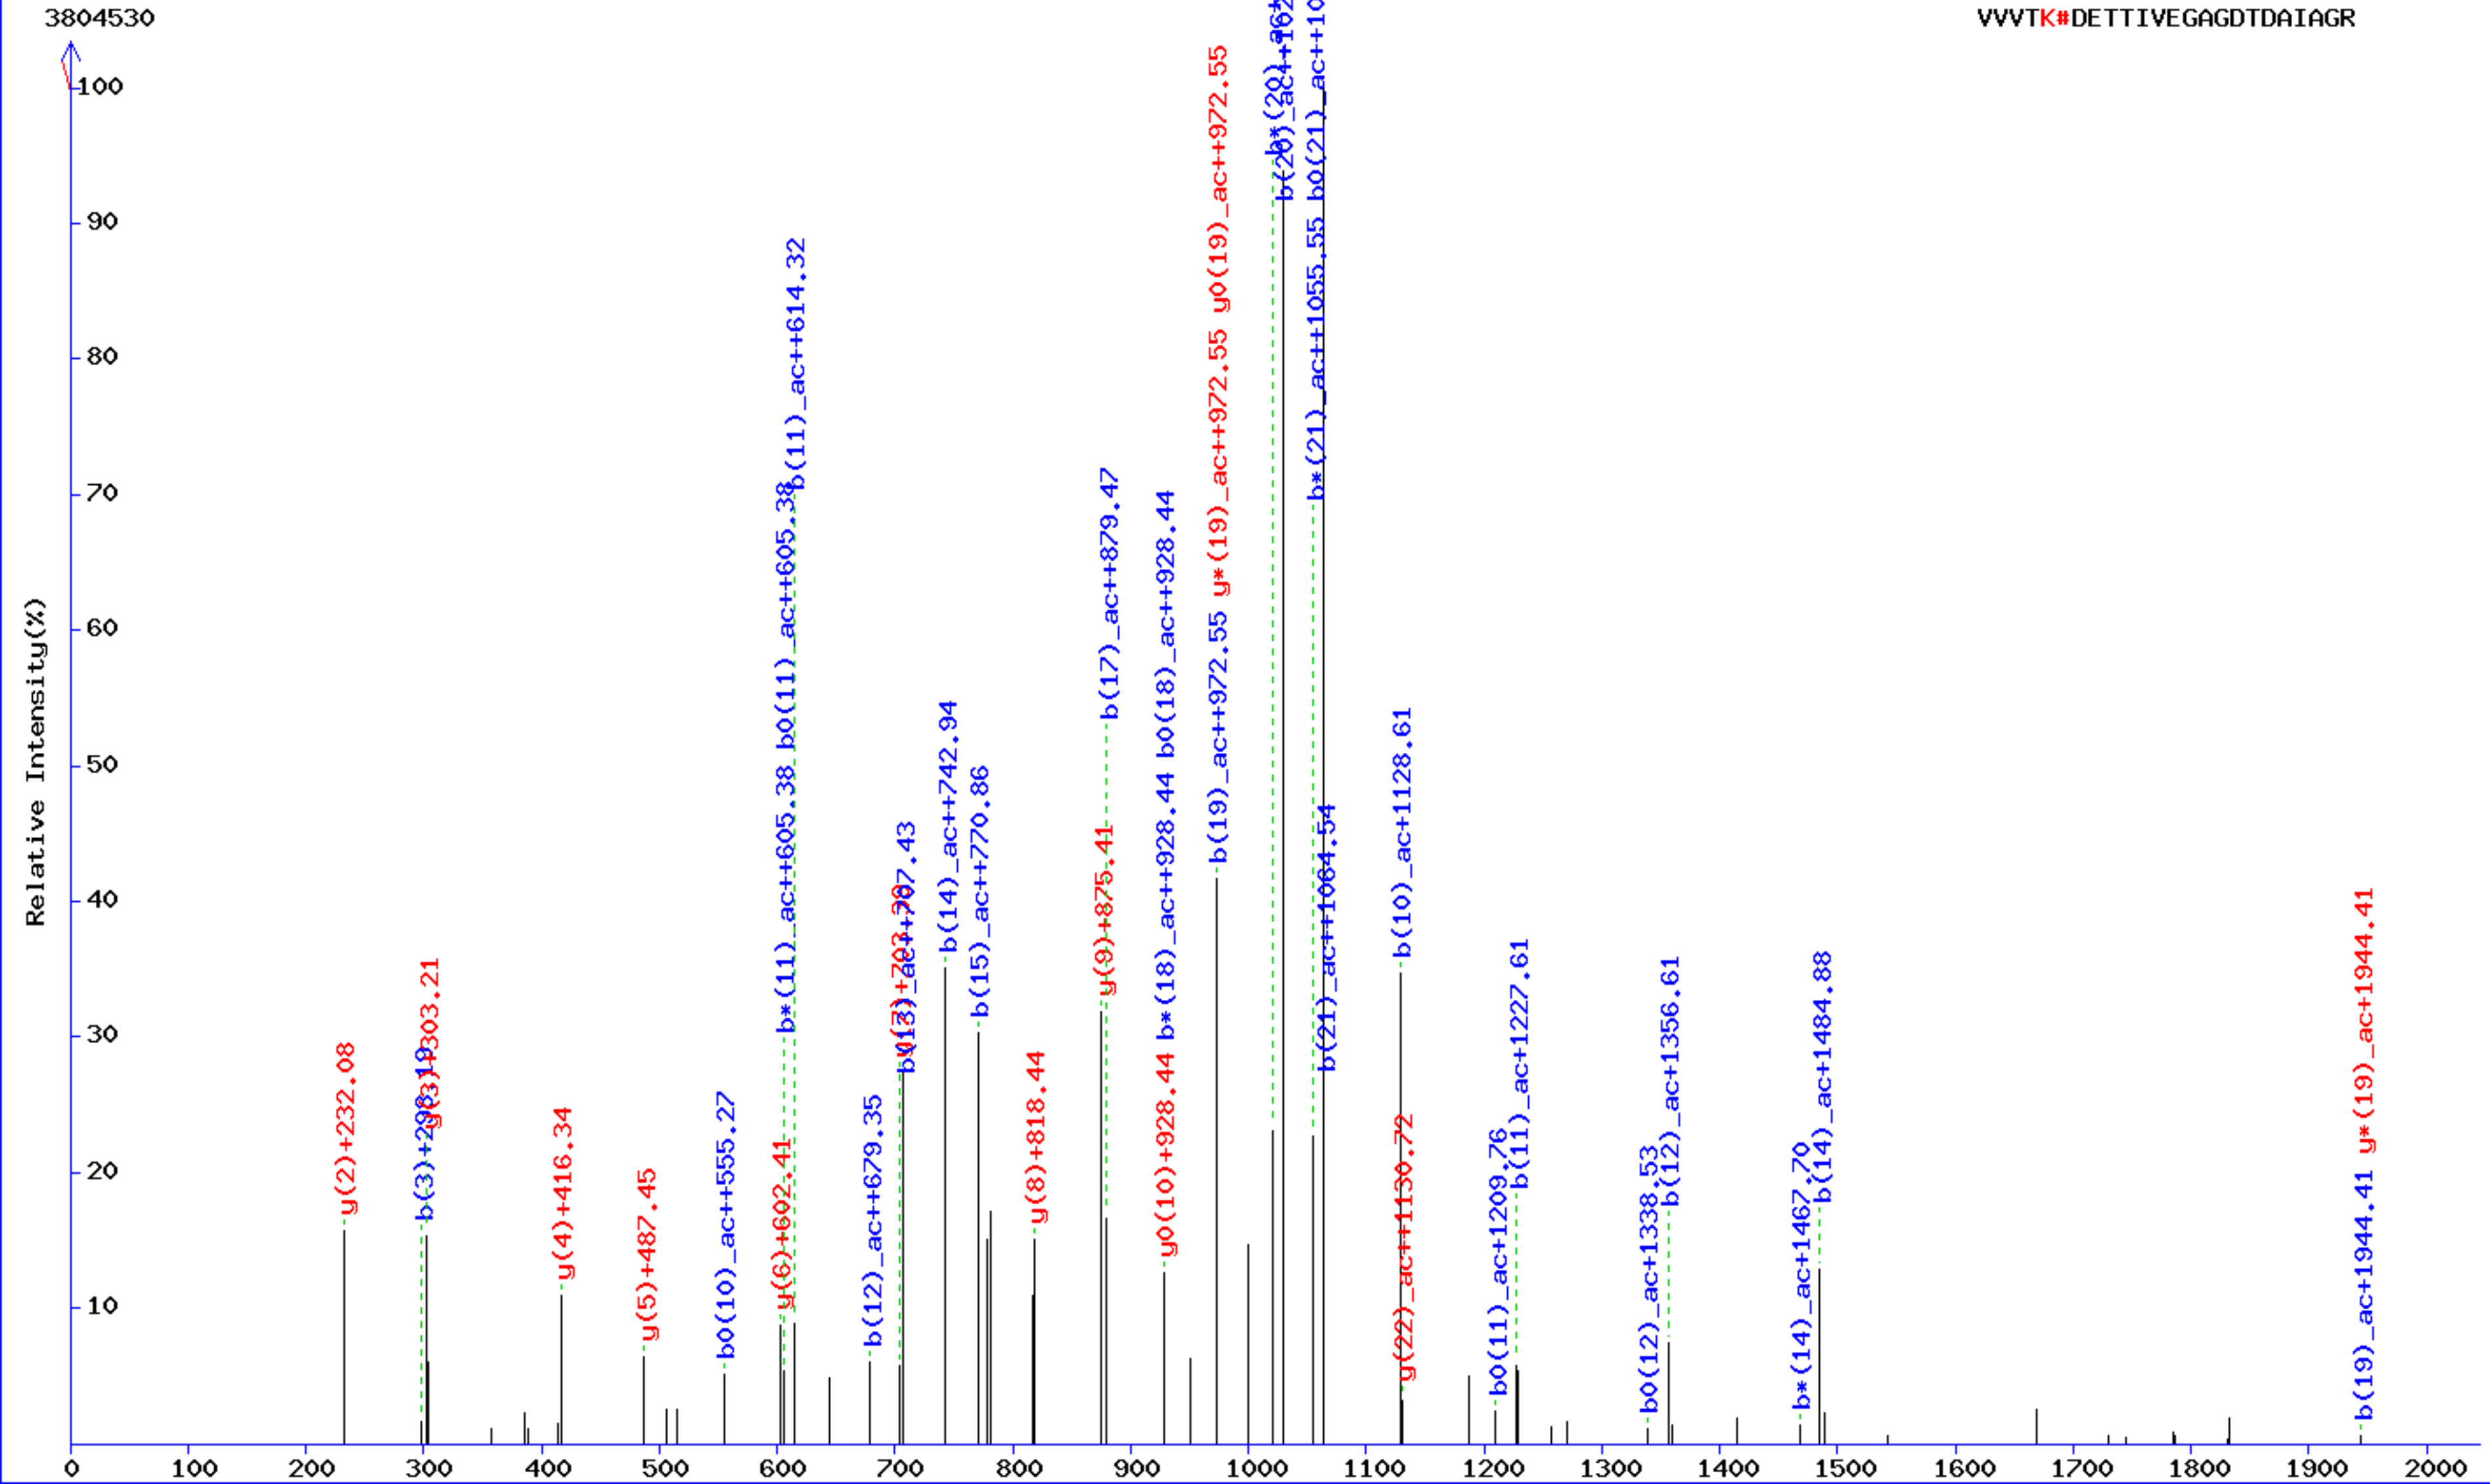

# gi|148661845 MRA\_2046 antigen Hsp20

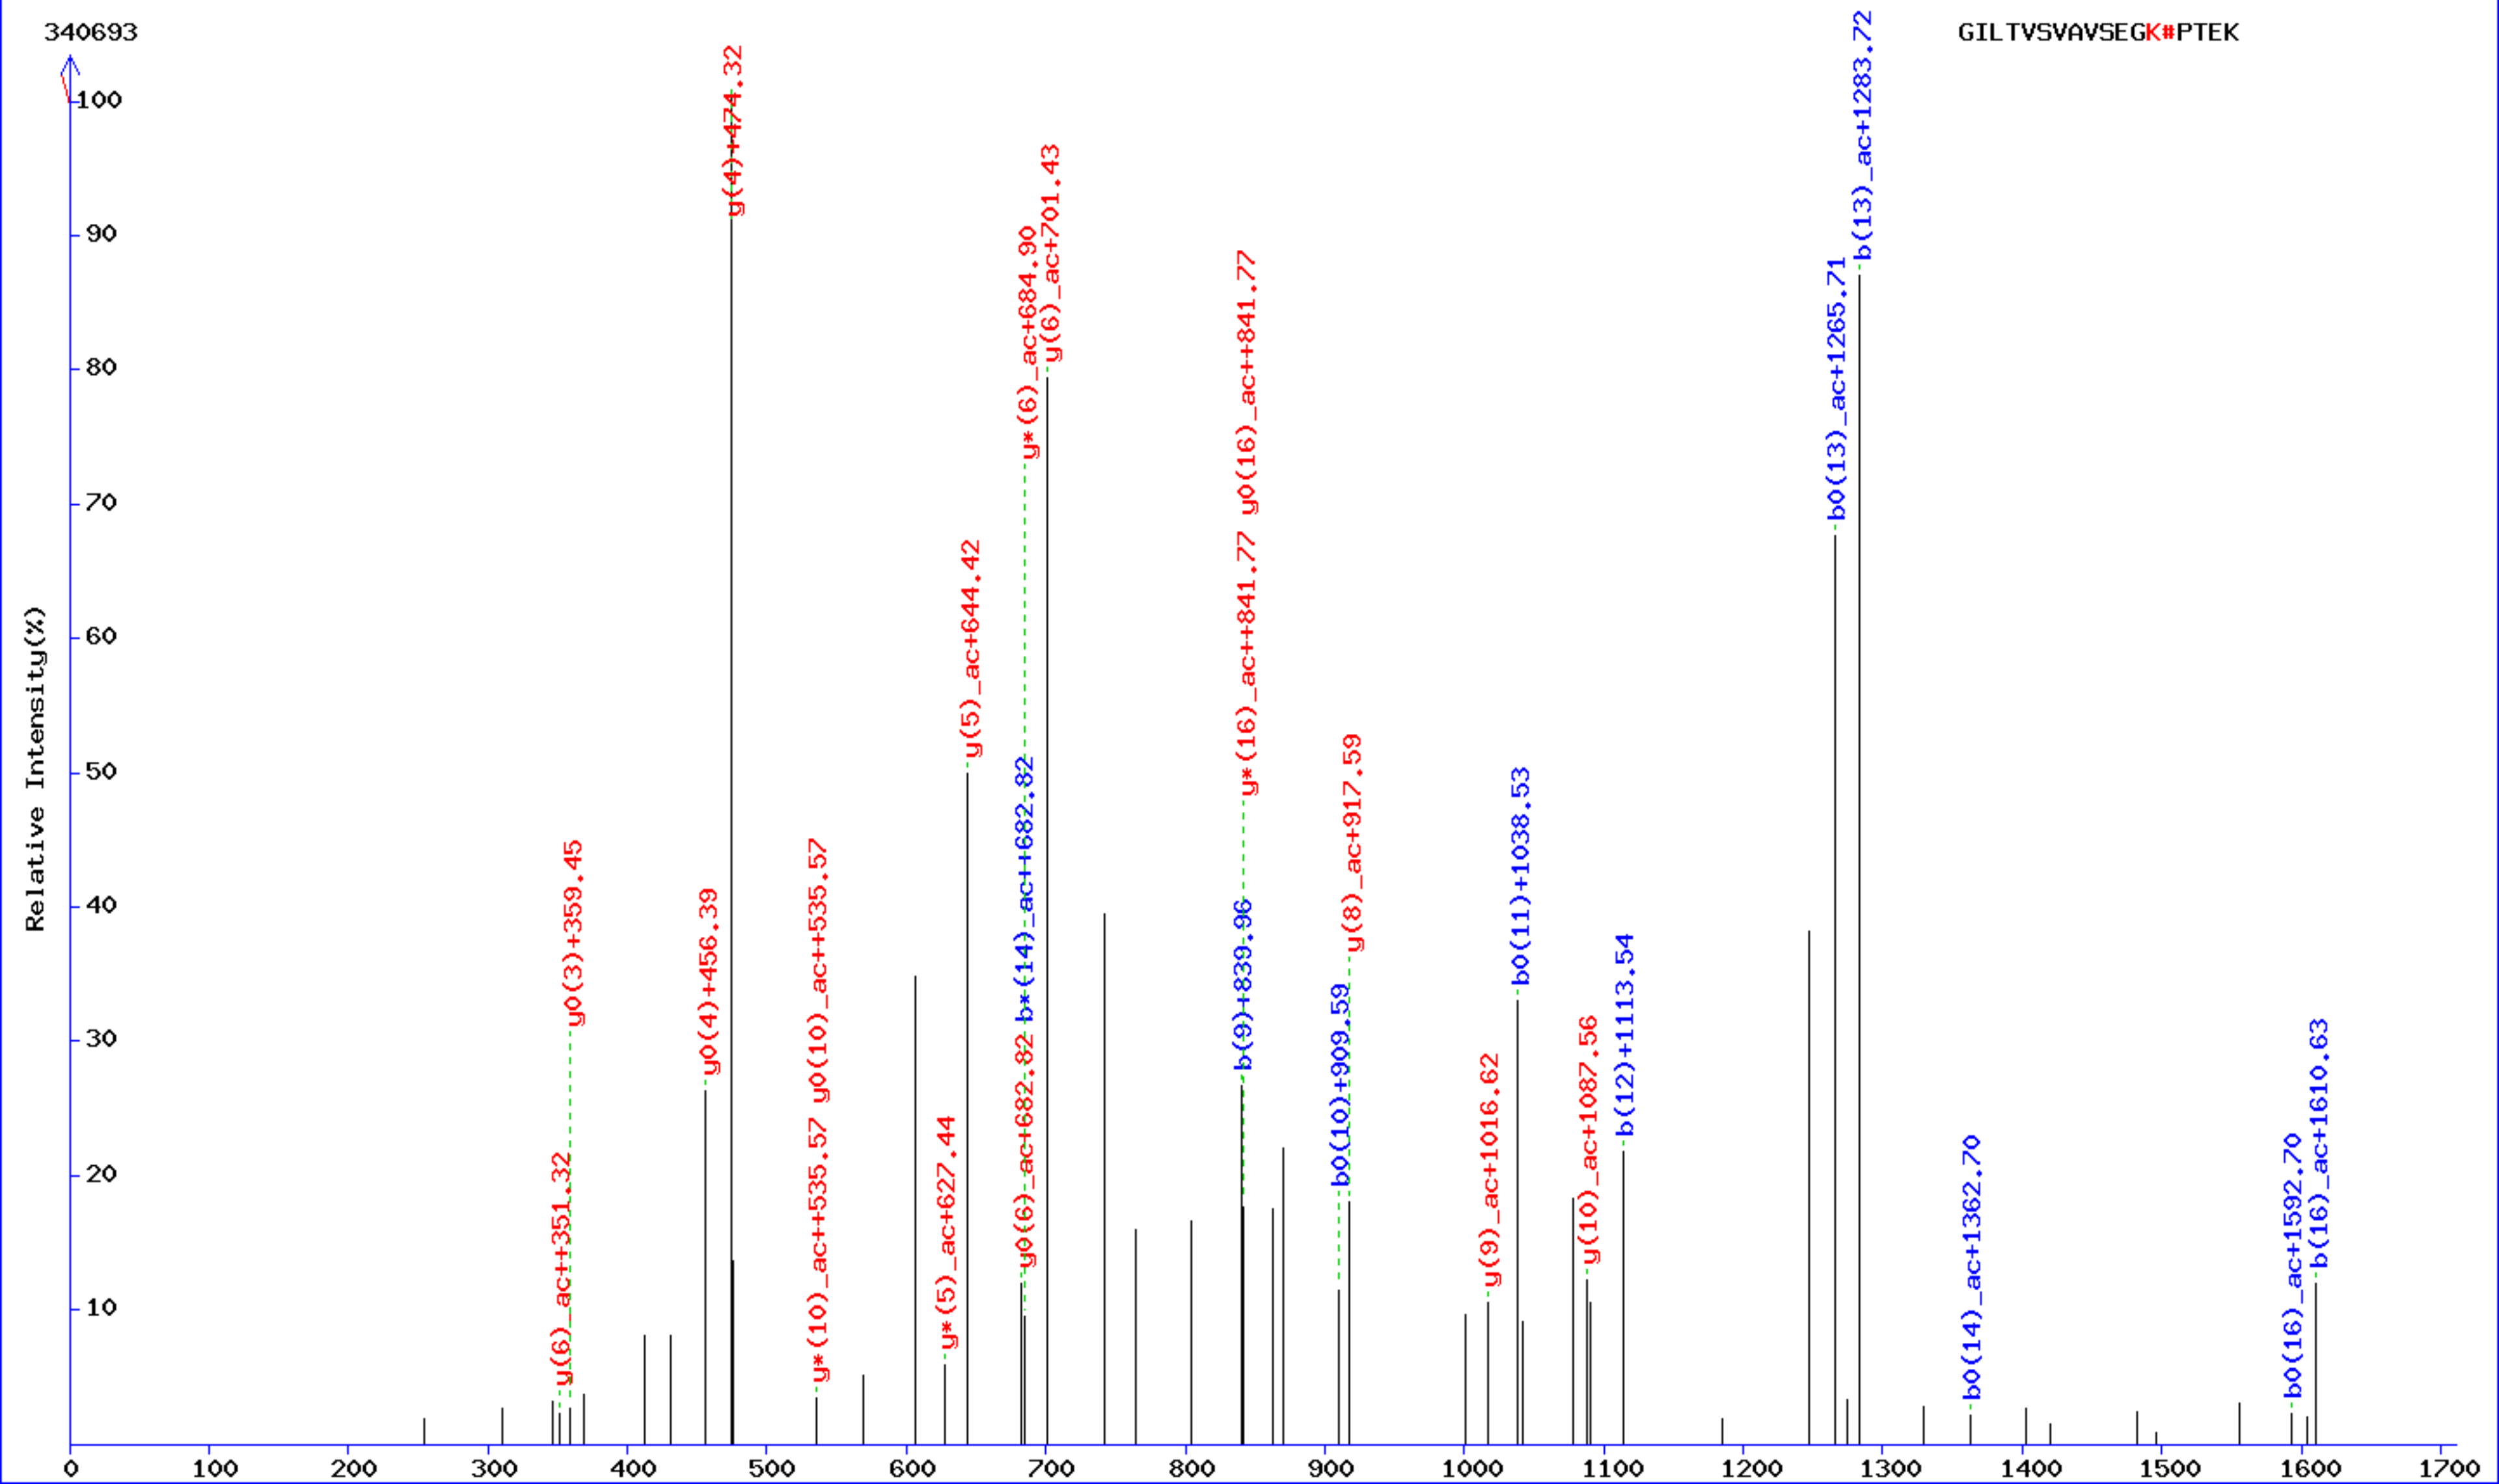

# gi|148661845 MRA\_2046 antigen Hsp20

ATYDK#GILTVSVAVSEGKPTK

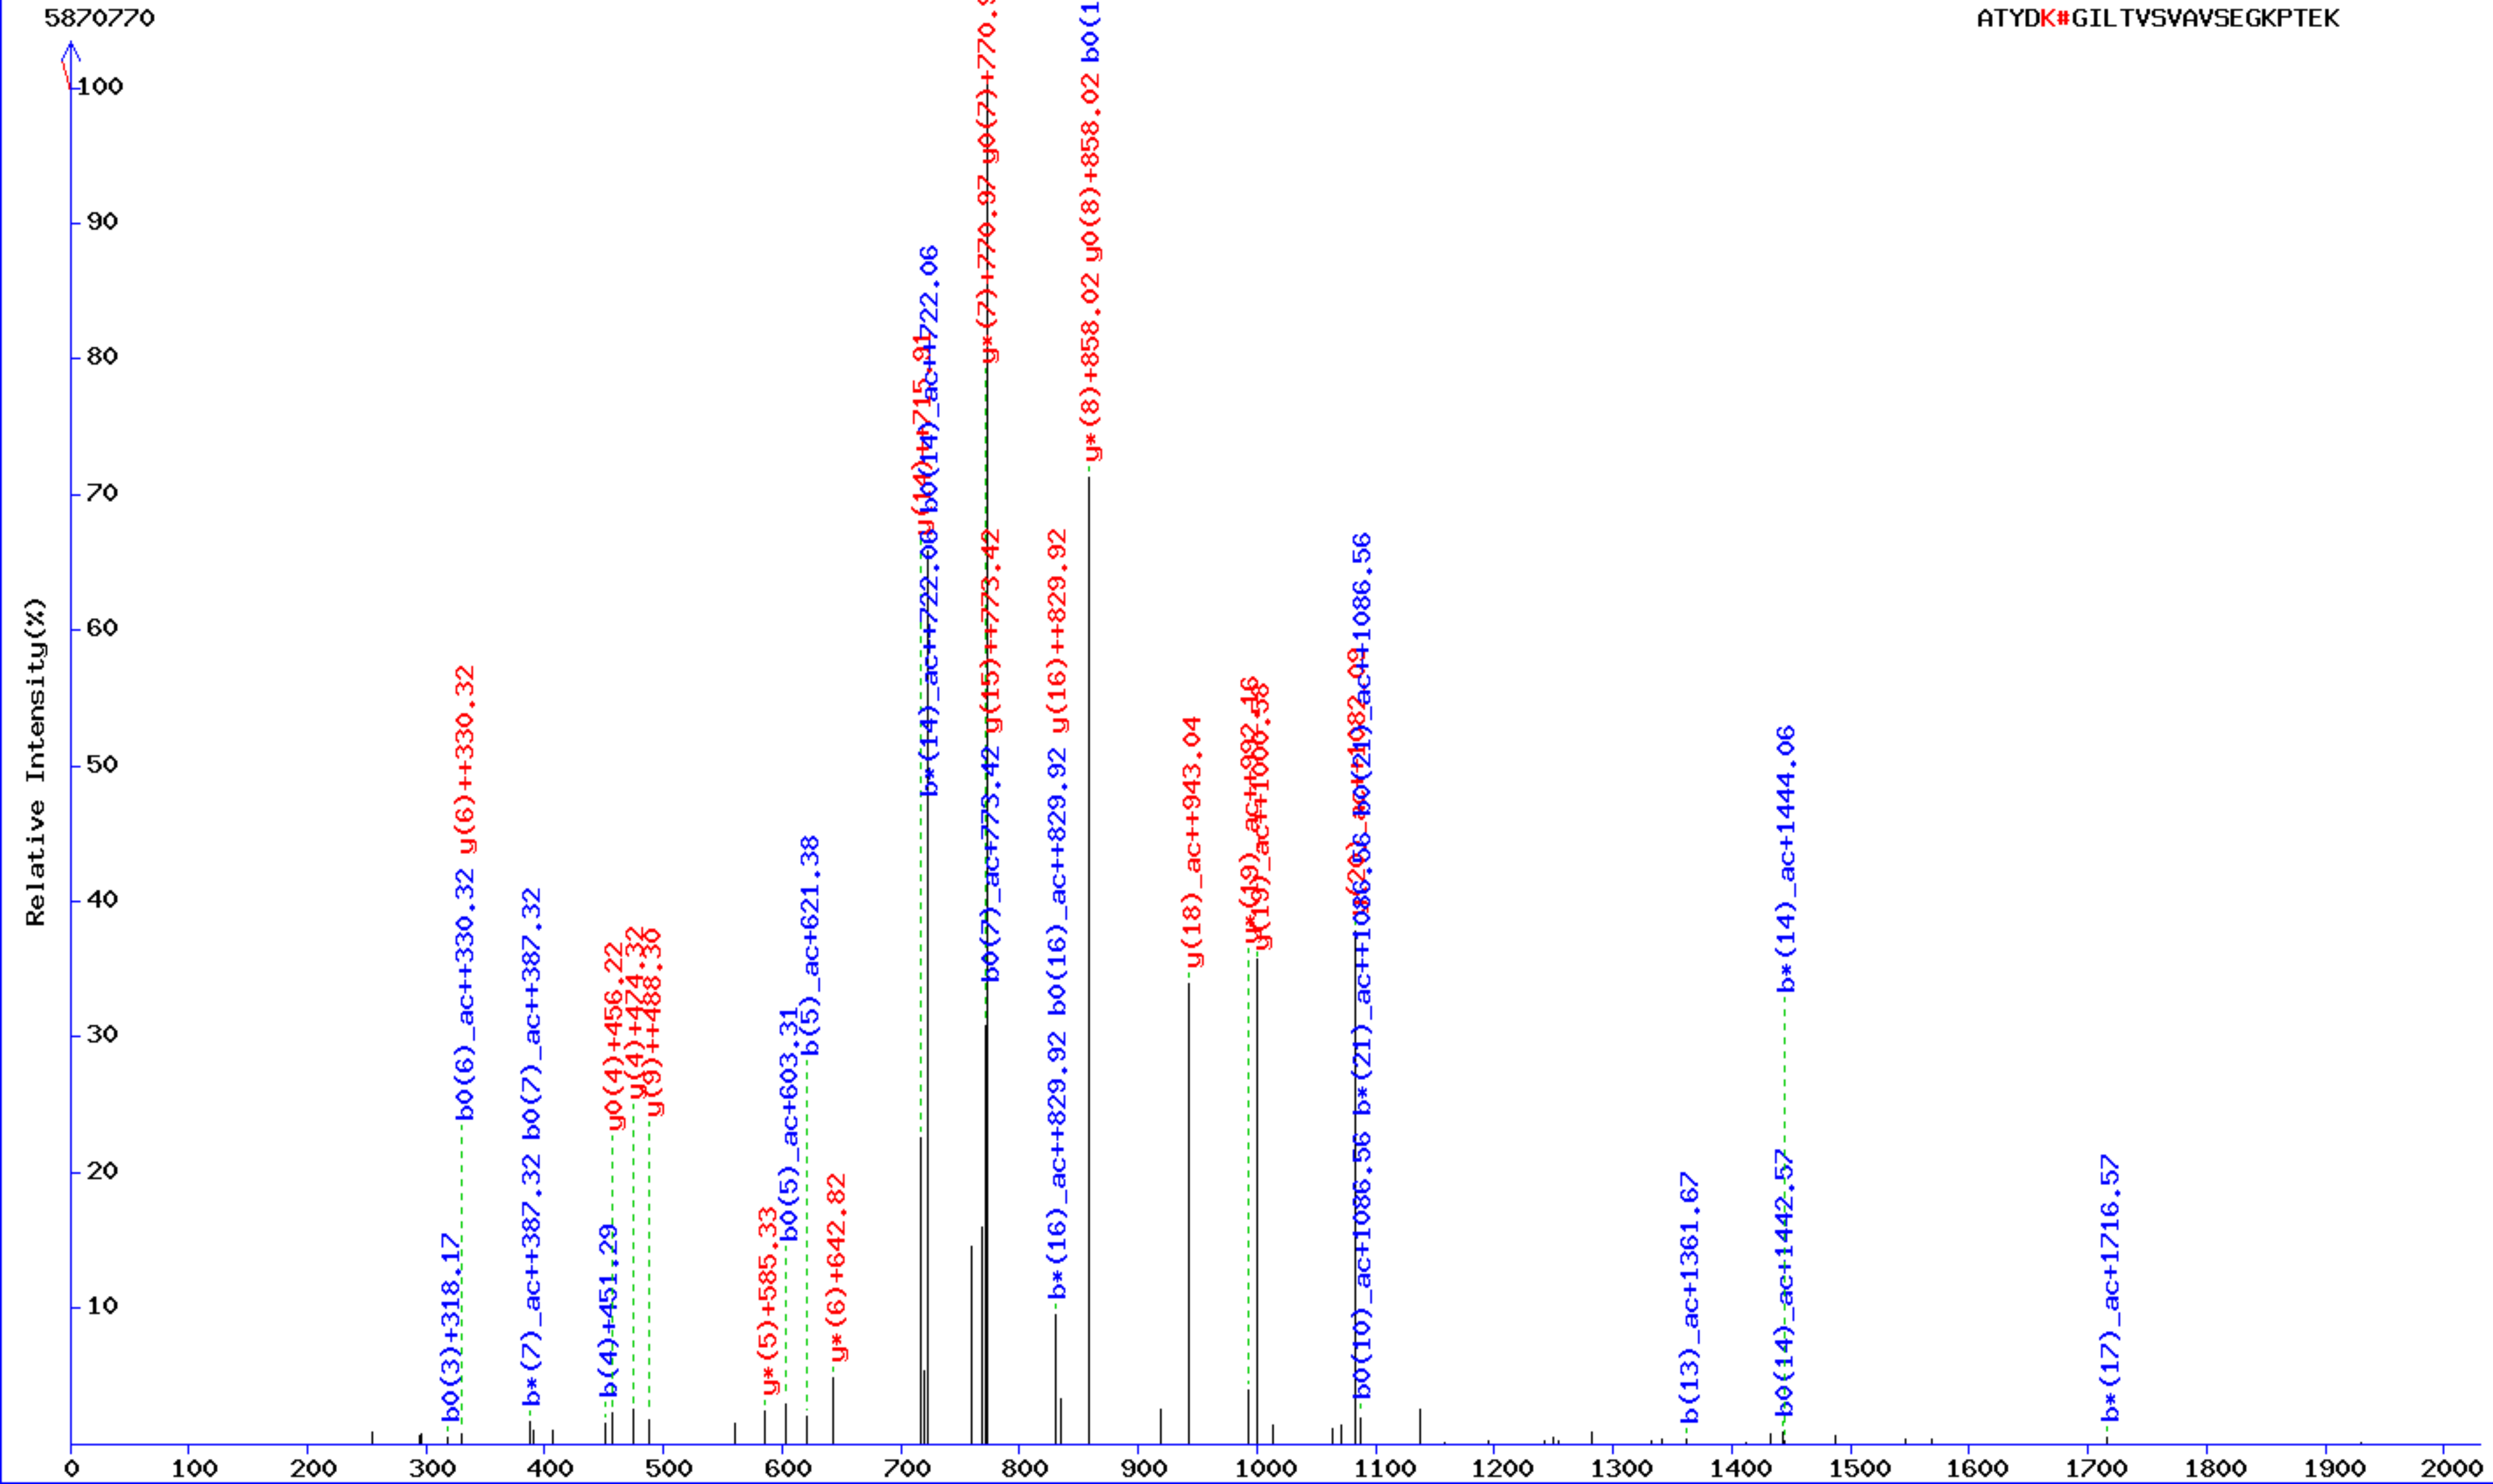

# gi|148660636 MRA\_0867 acetyl-CoA acetyltransferase

PAFEGLAALGGFDDVALQK#YHWVEK

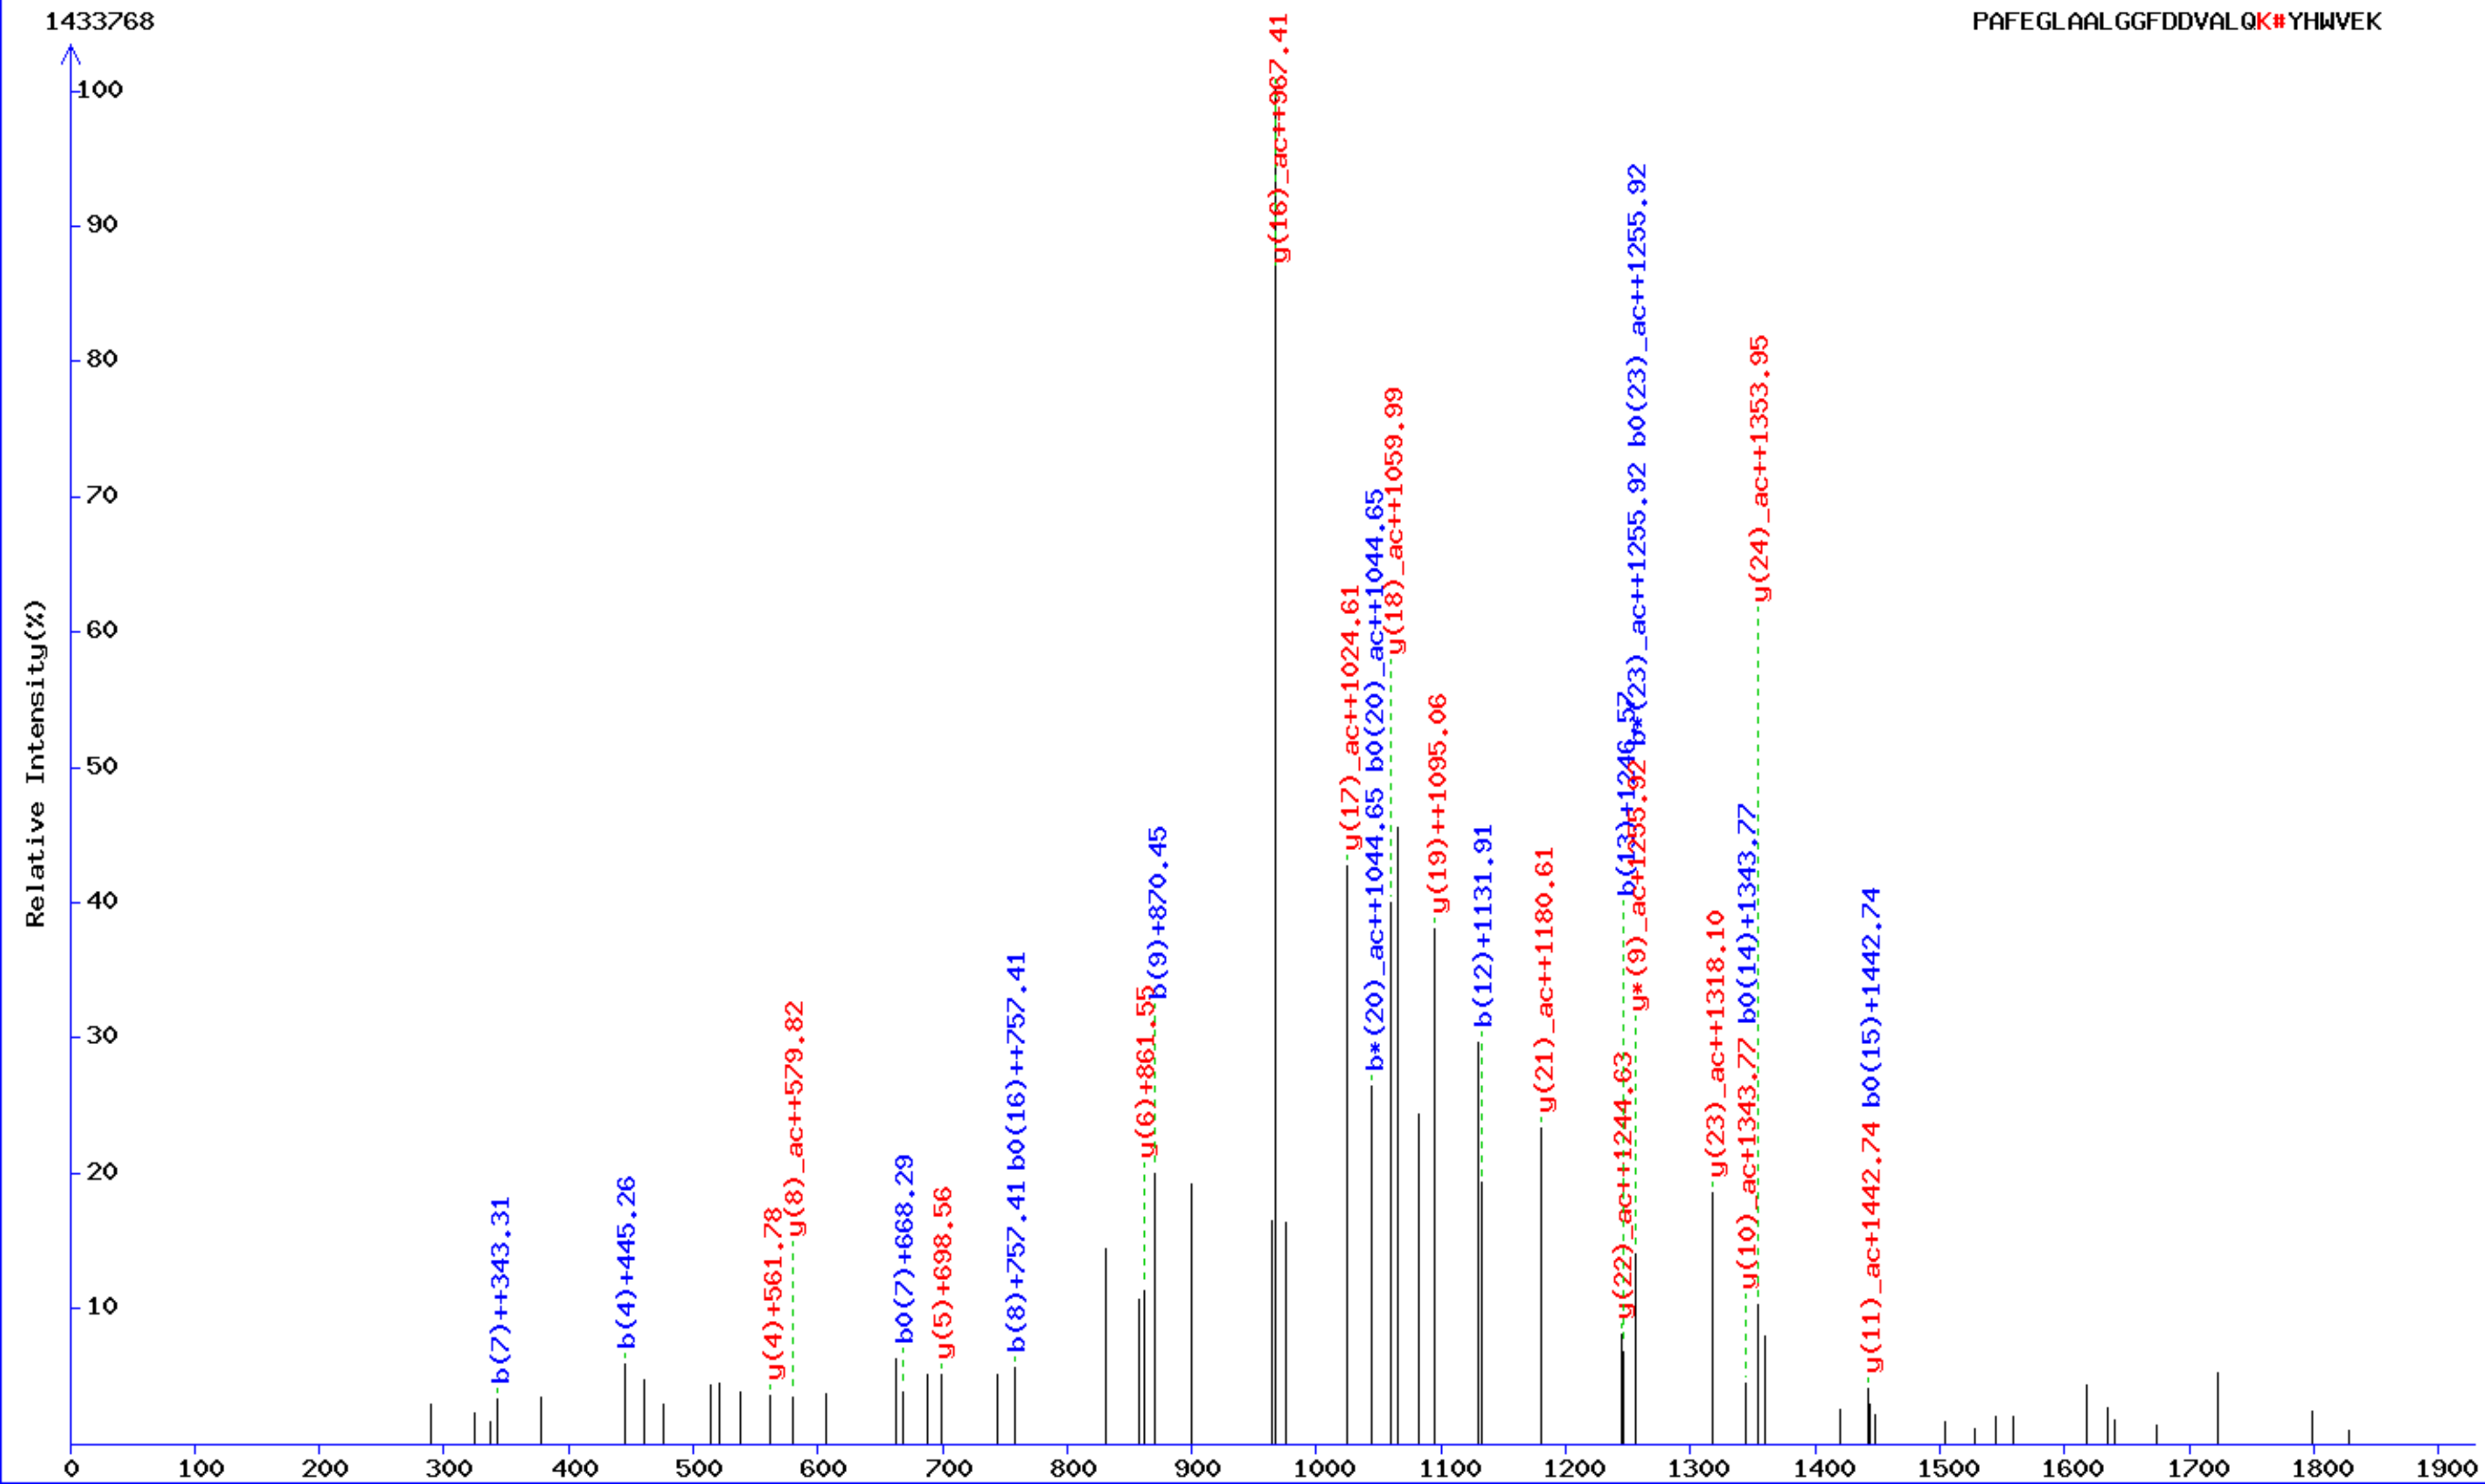

# gi|148663668 MRA\_3840 polyketide synthase

DANLYNVEK#LIEYAVEHR

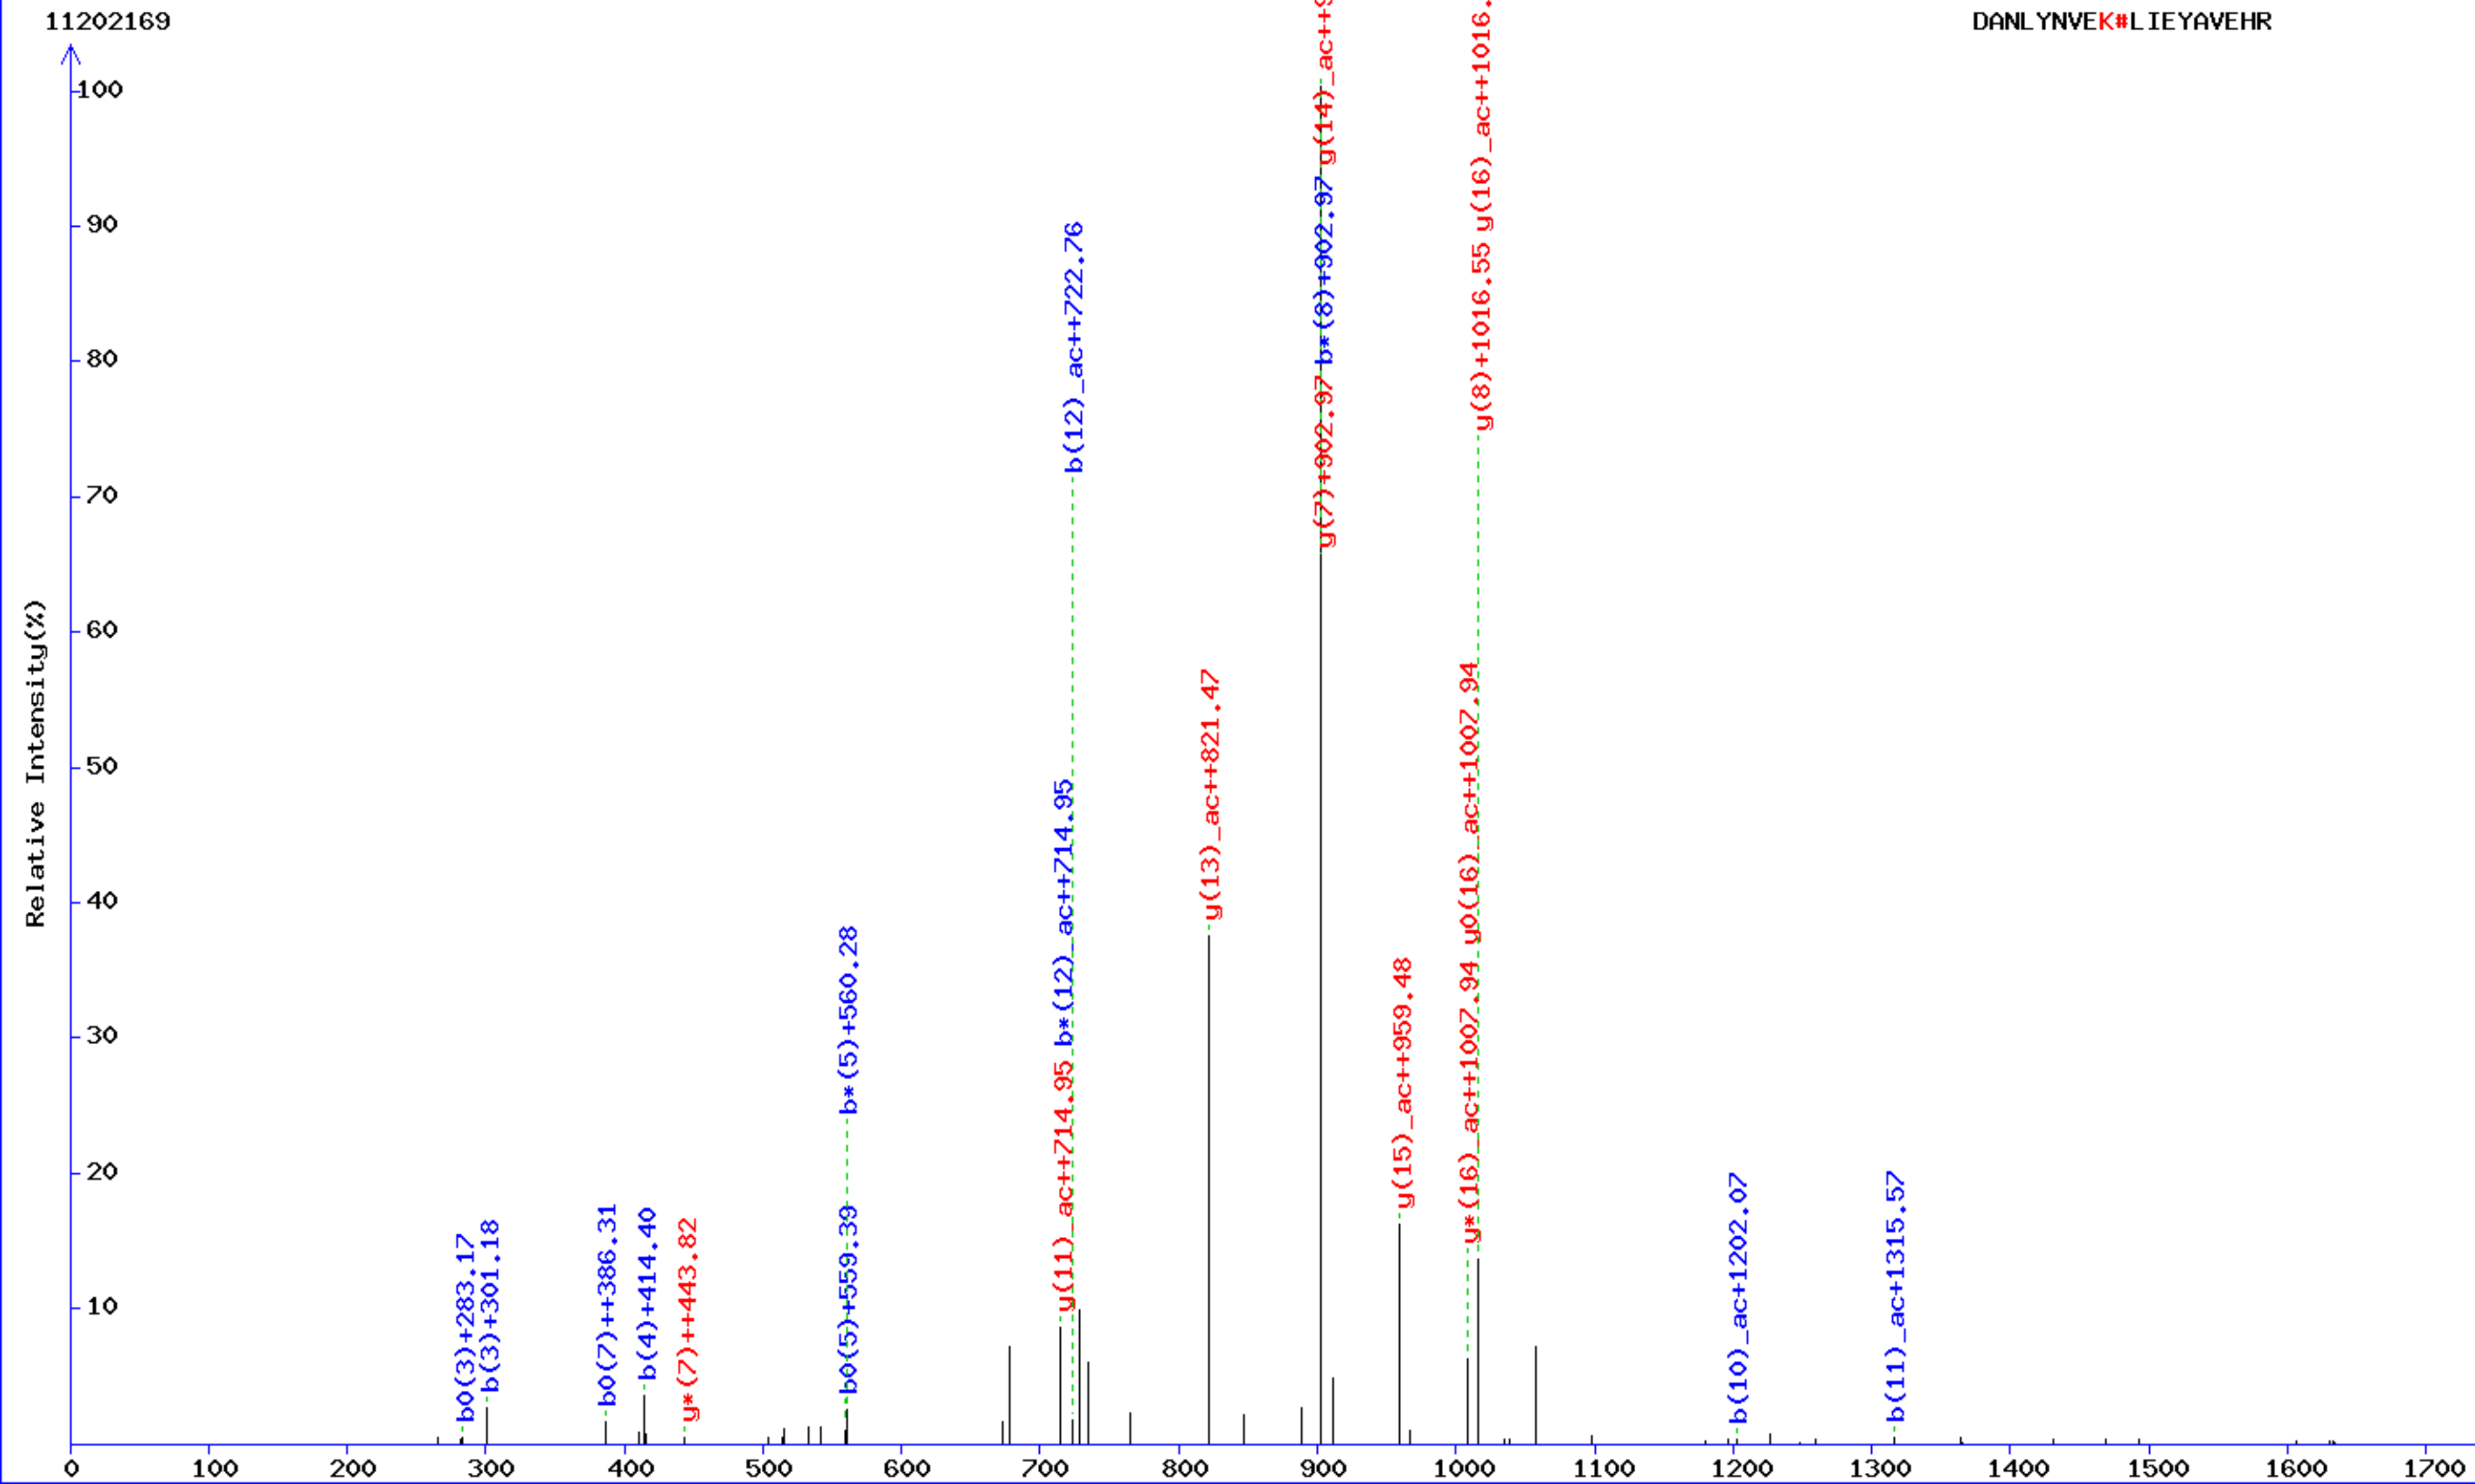



gi|148660602 MRA\_0834 fatty acid desaturase

L TDLQLLHELEPVVEK#YLNR

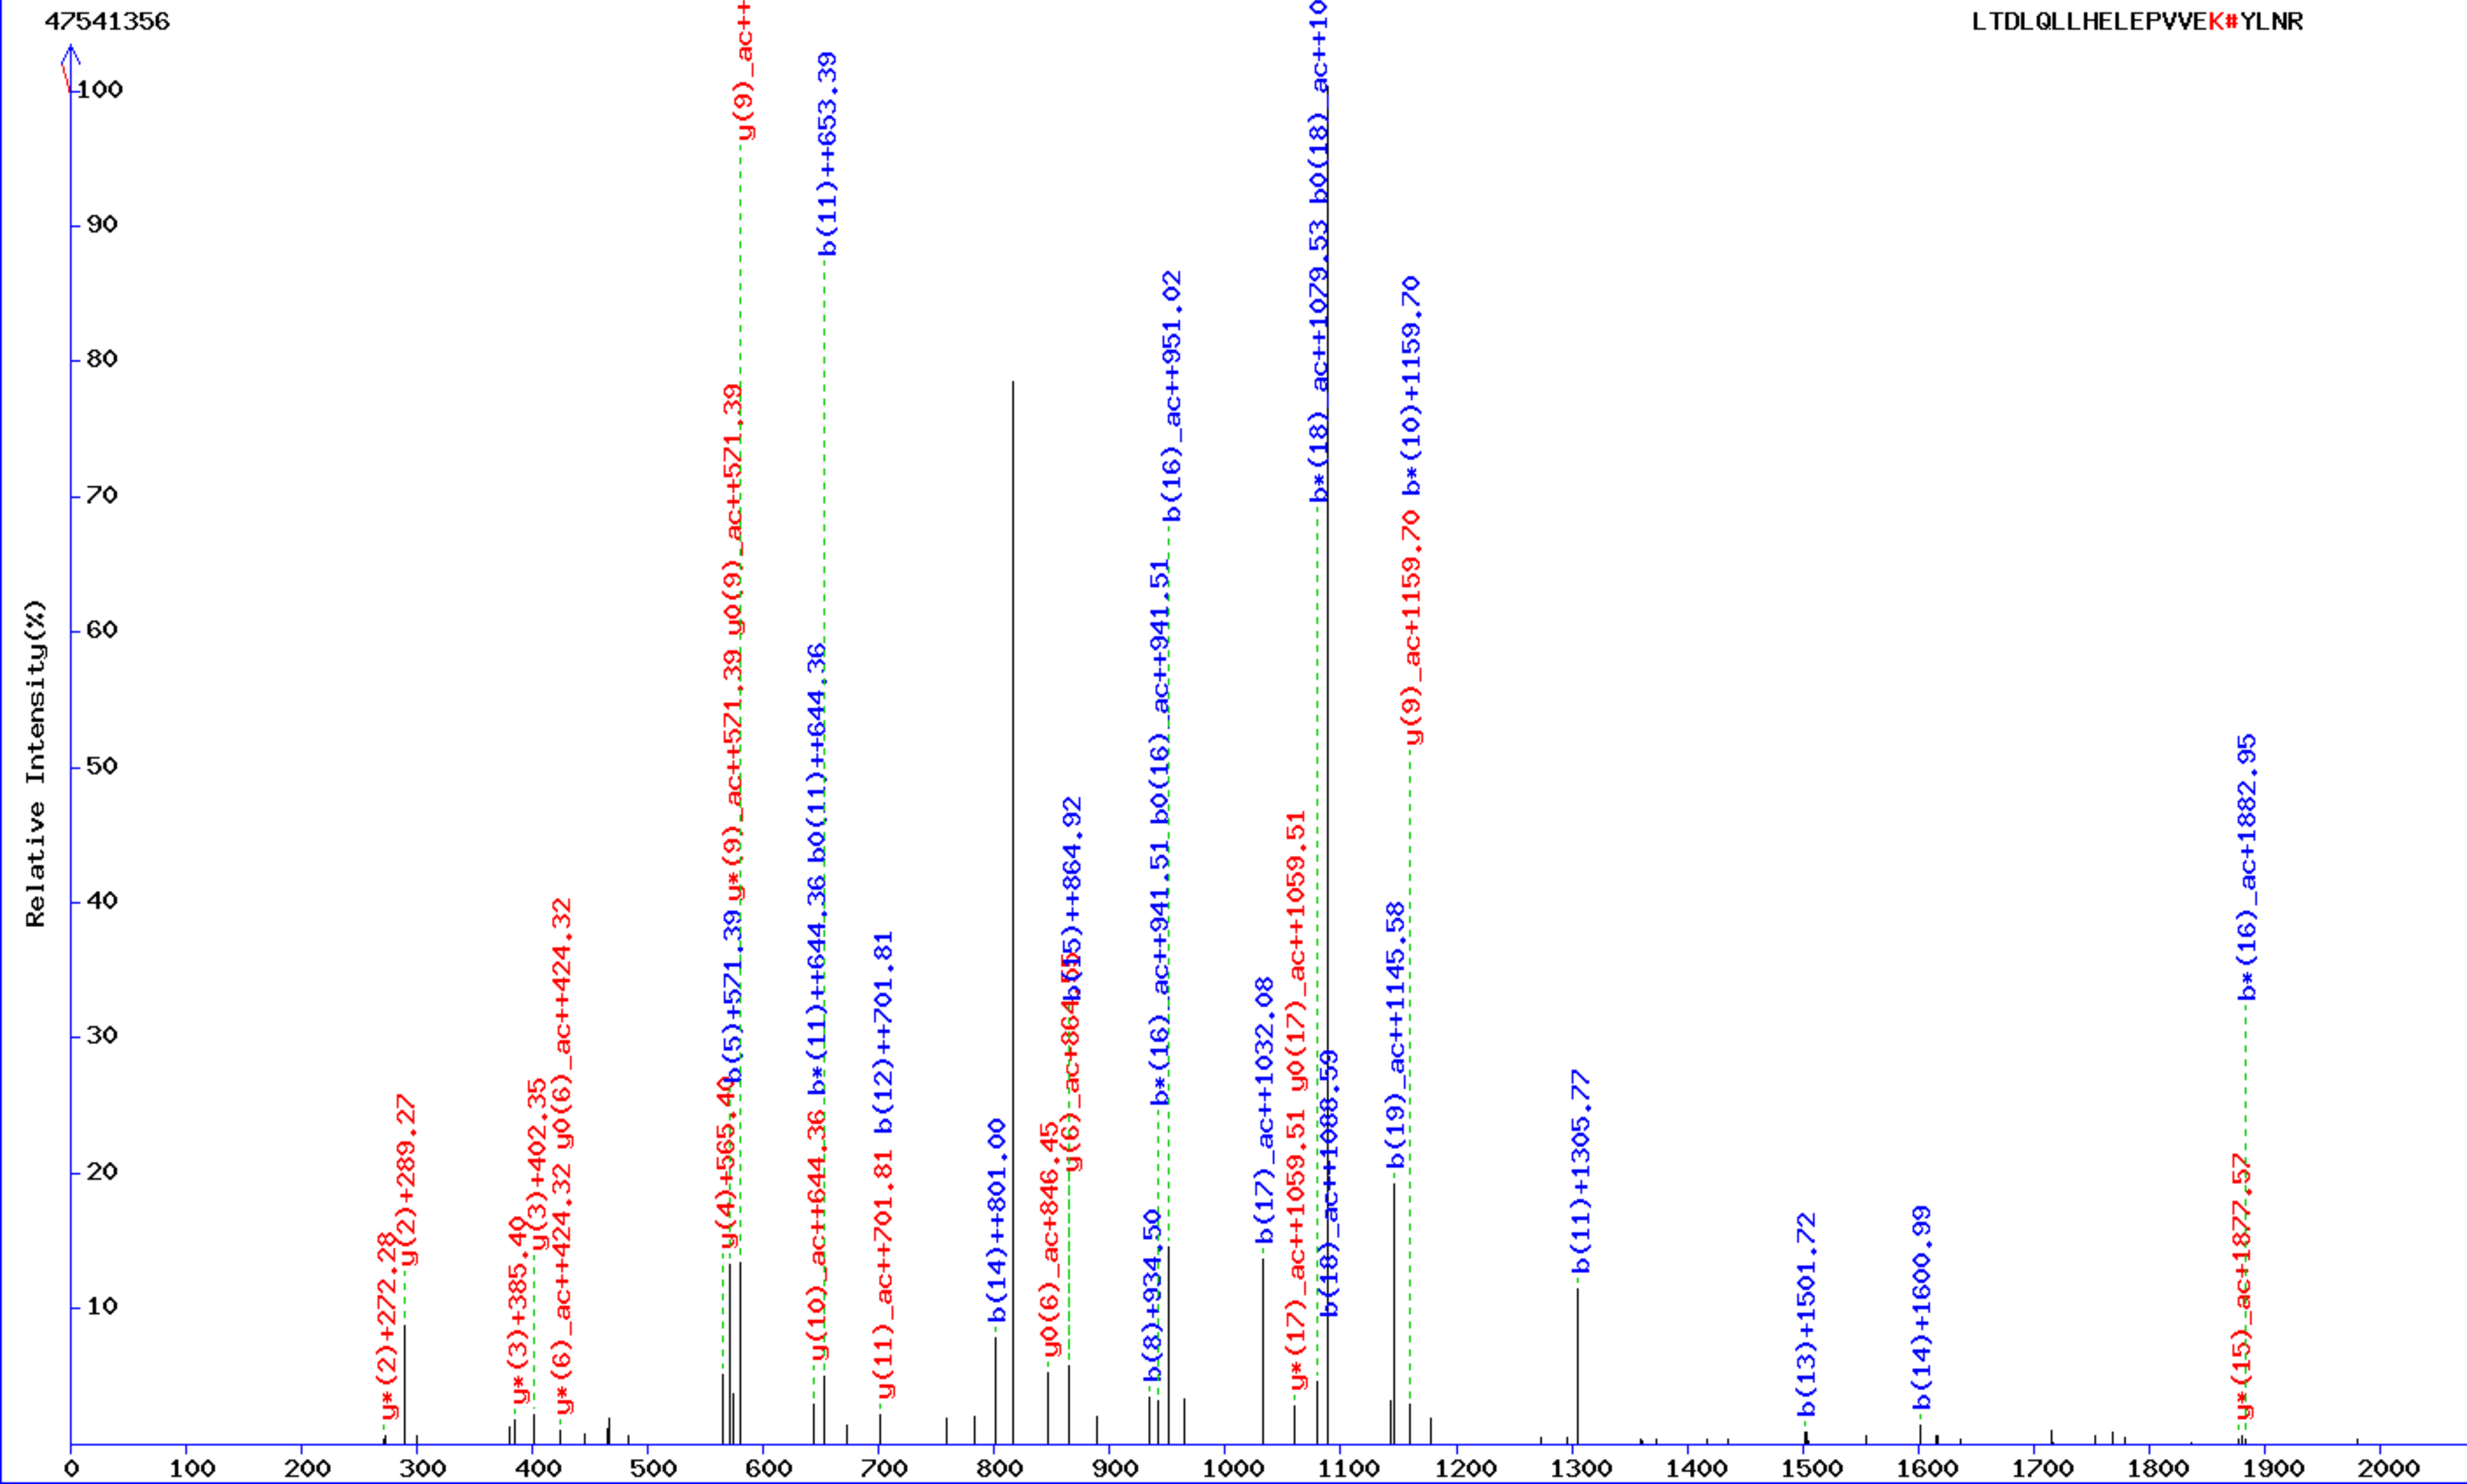

# gi|148661816 MRA\_2018 20-beta-hydroxysteroid dehydrogenase FabG3

VVFGDILDEEGK#AVAAELADAAR

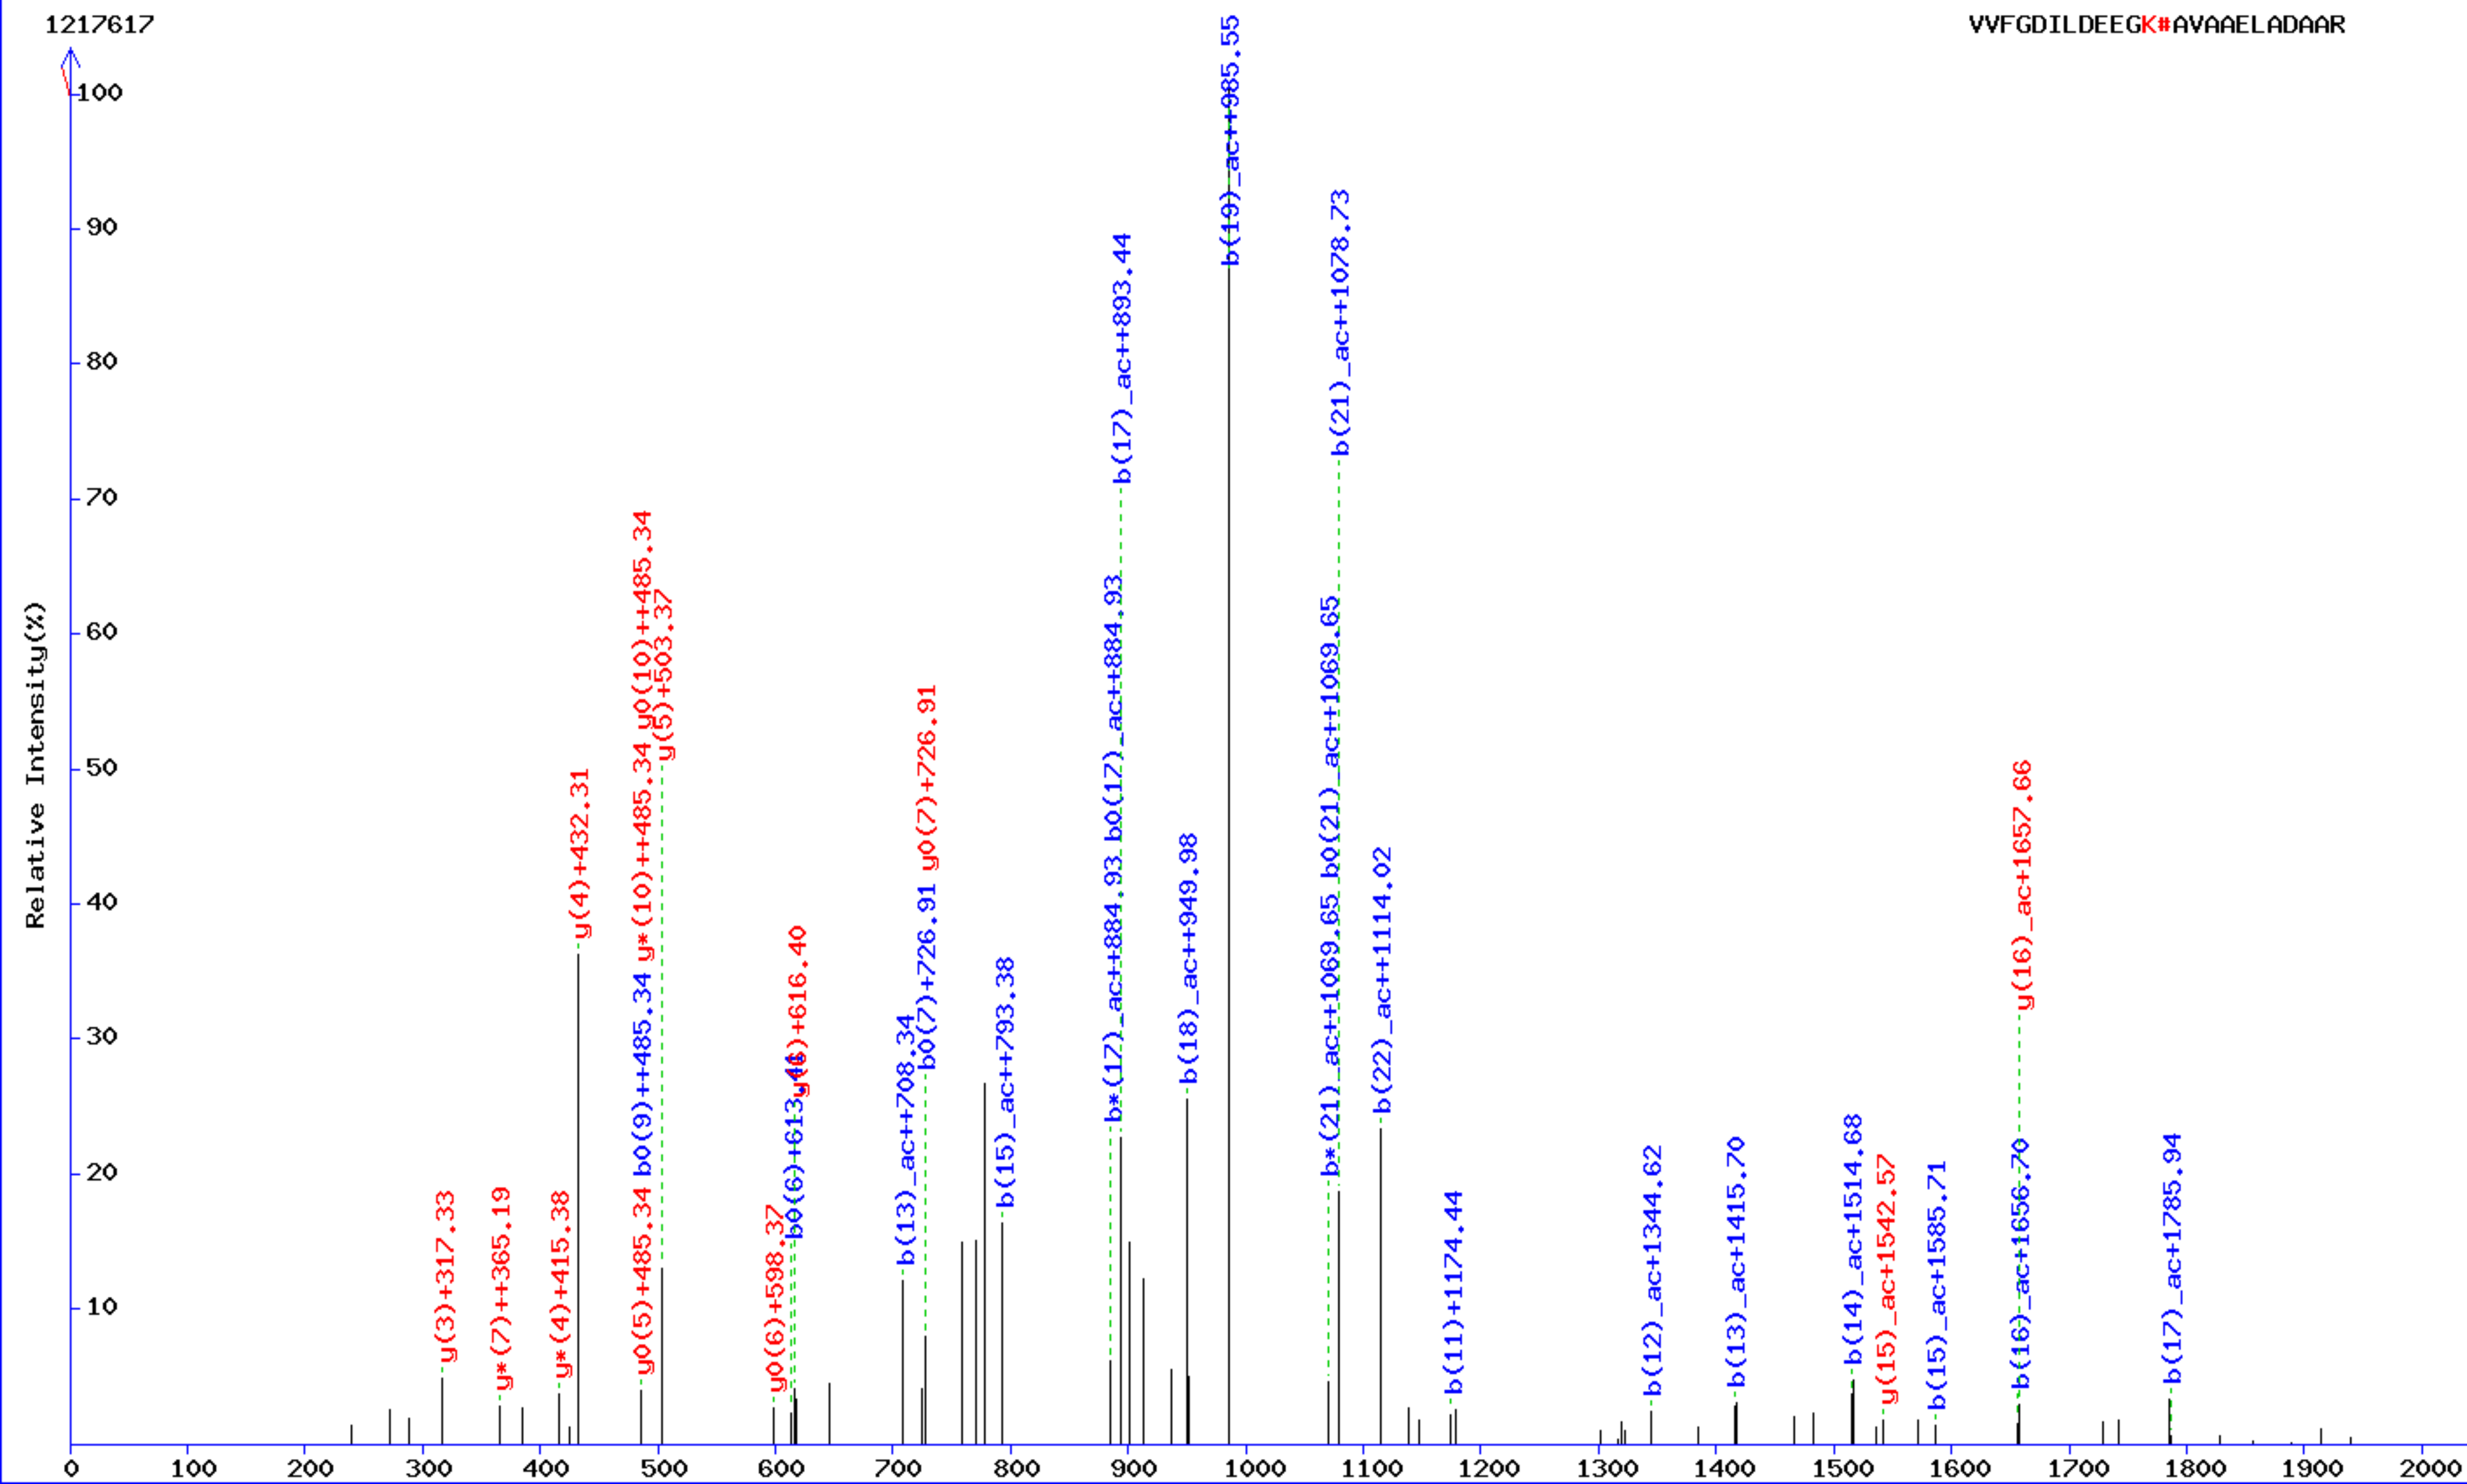

# gi|148660205 MRA\_0445 molecular chaperone GroEL

SALQNAASIAGLFLTTEAVVADK#PEK

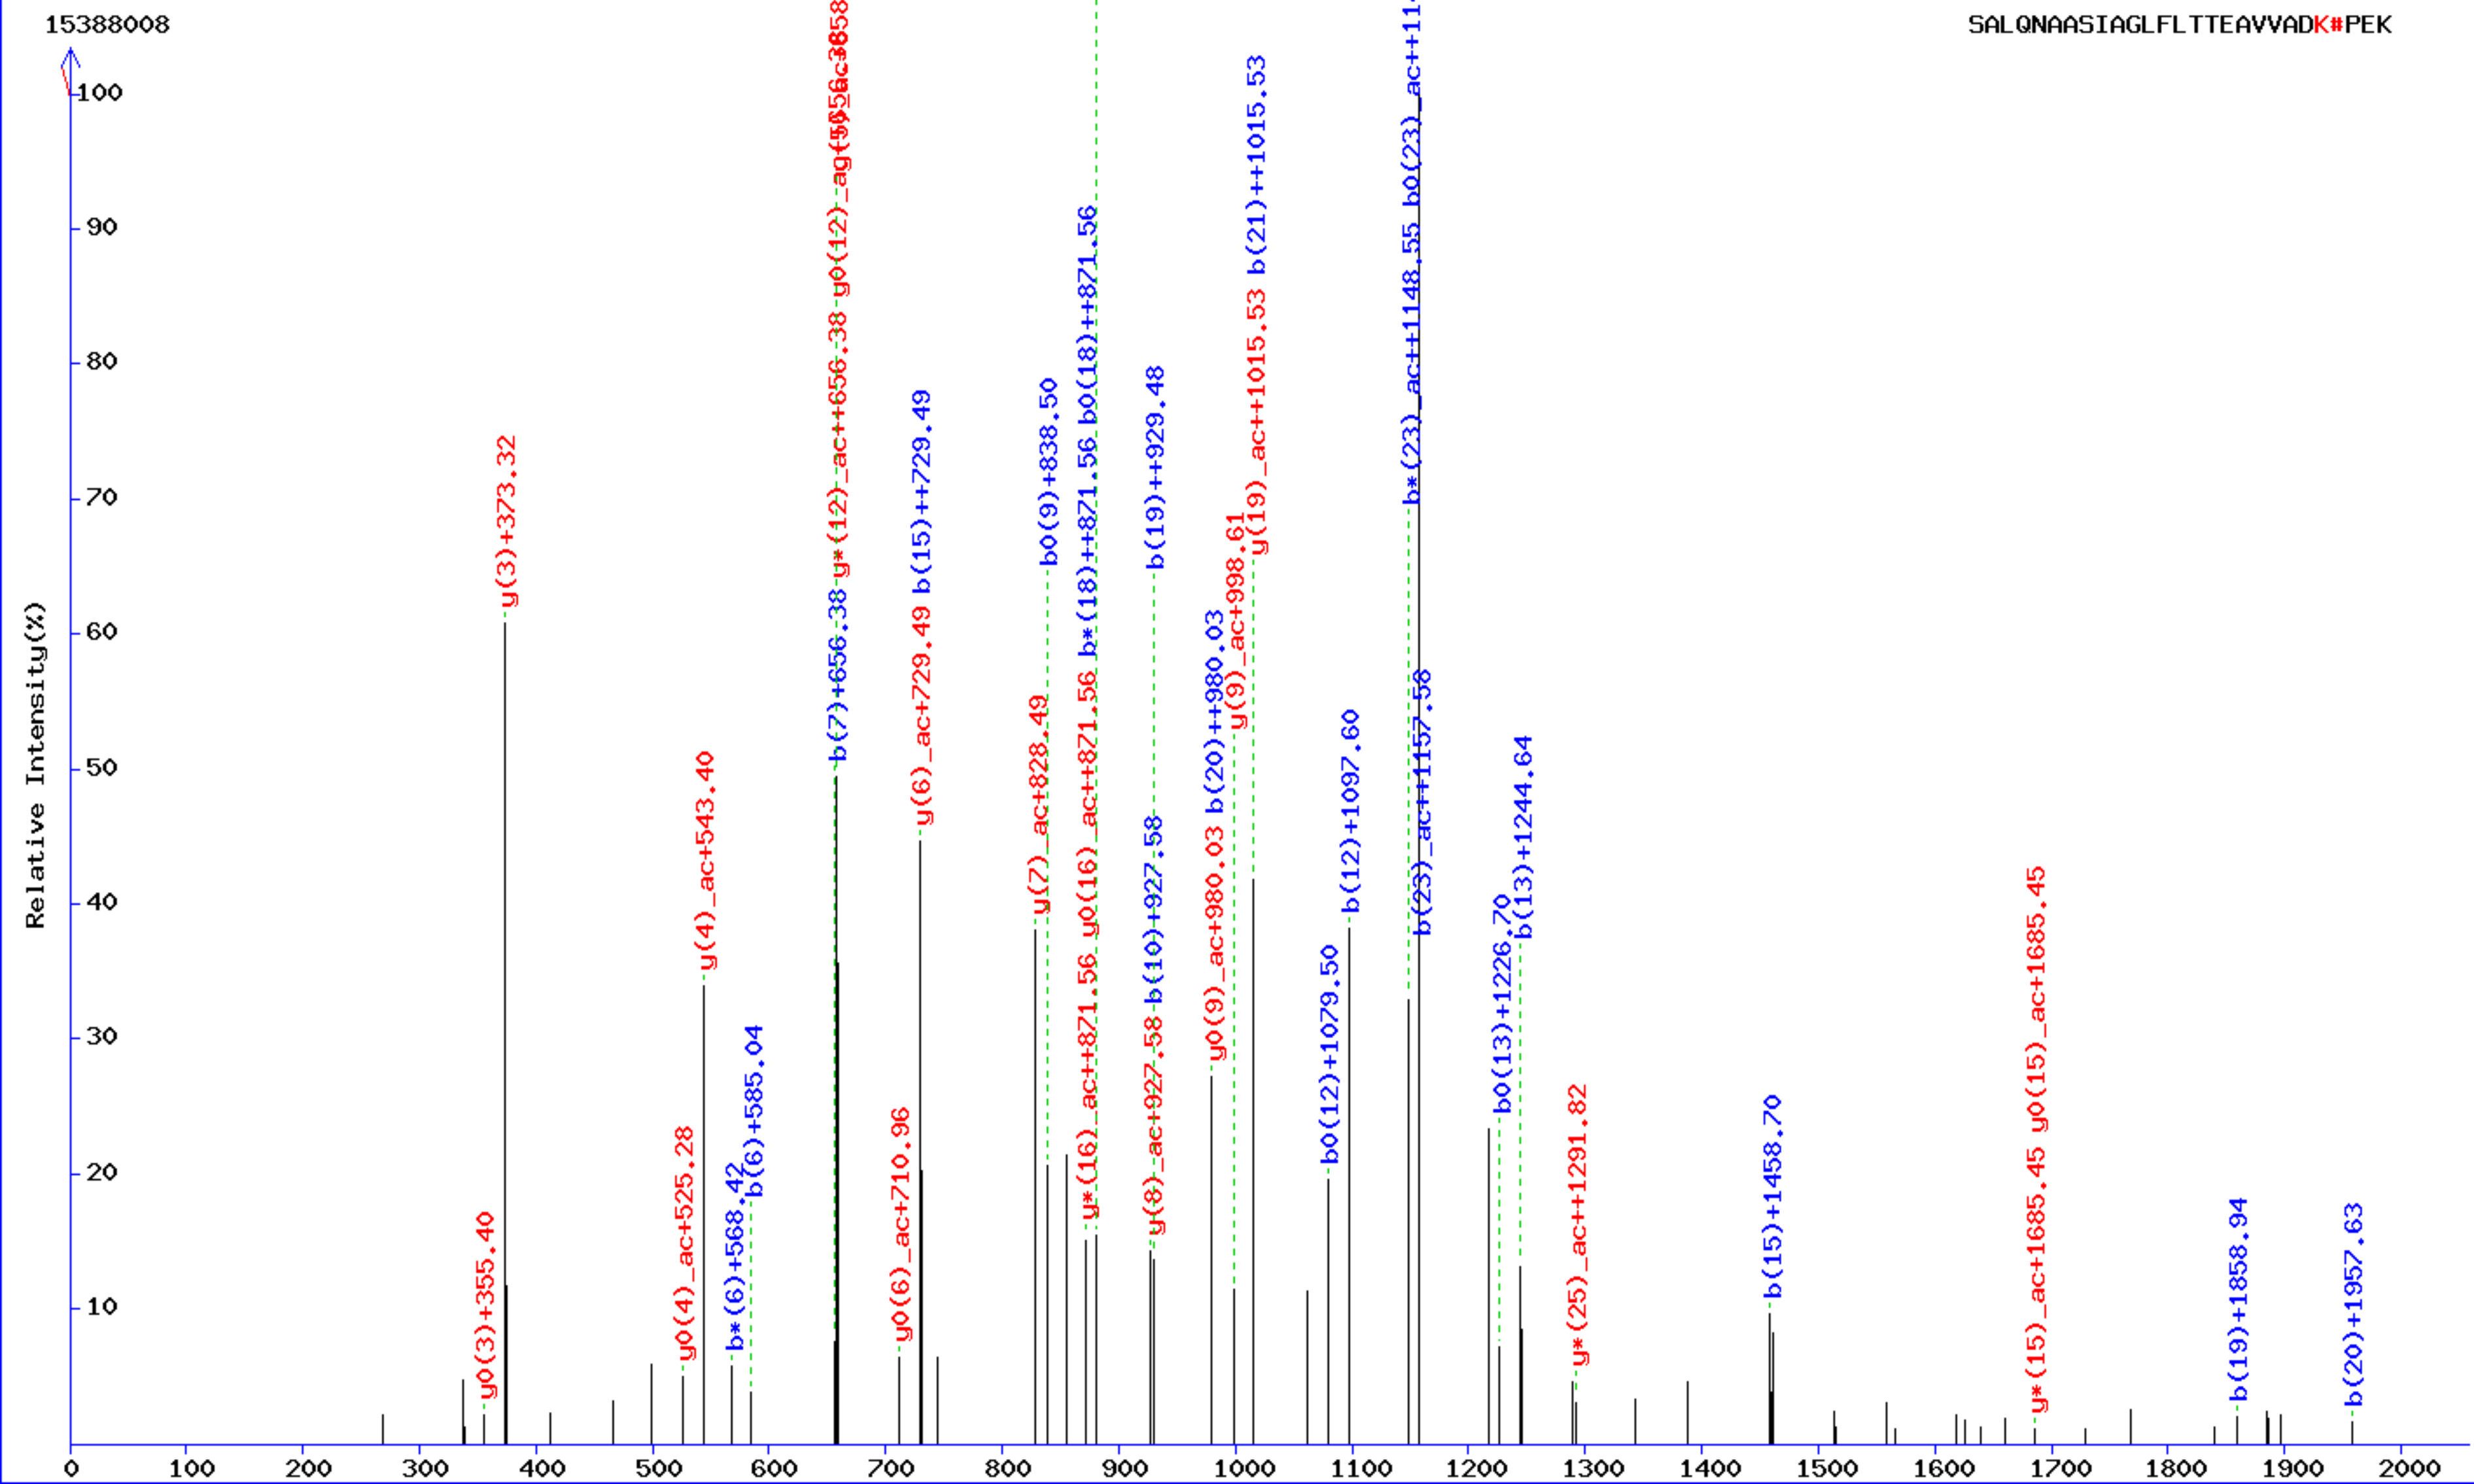

# gi|148660205 MRA\_0445 molecular chaperone GroEL

DLLP~~L~~EK#VIGAGK

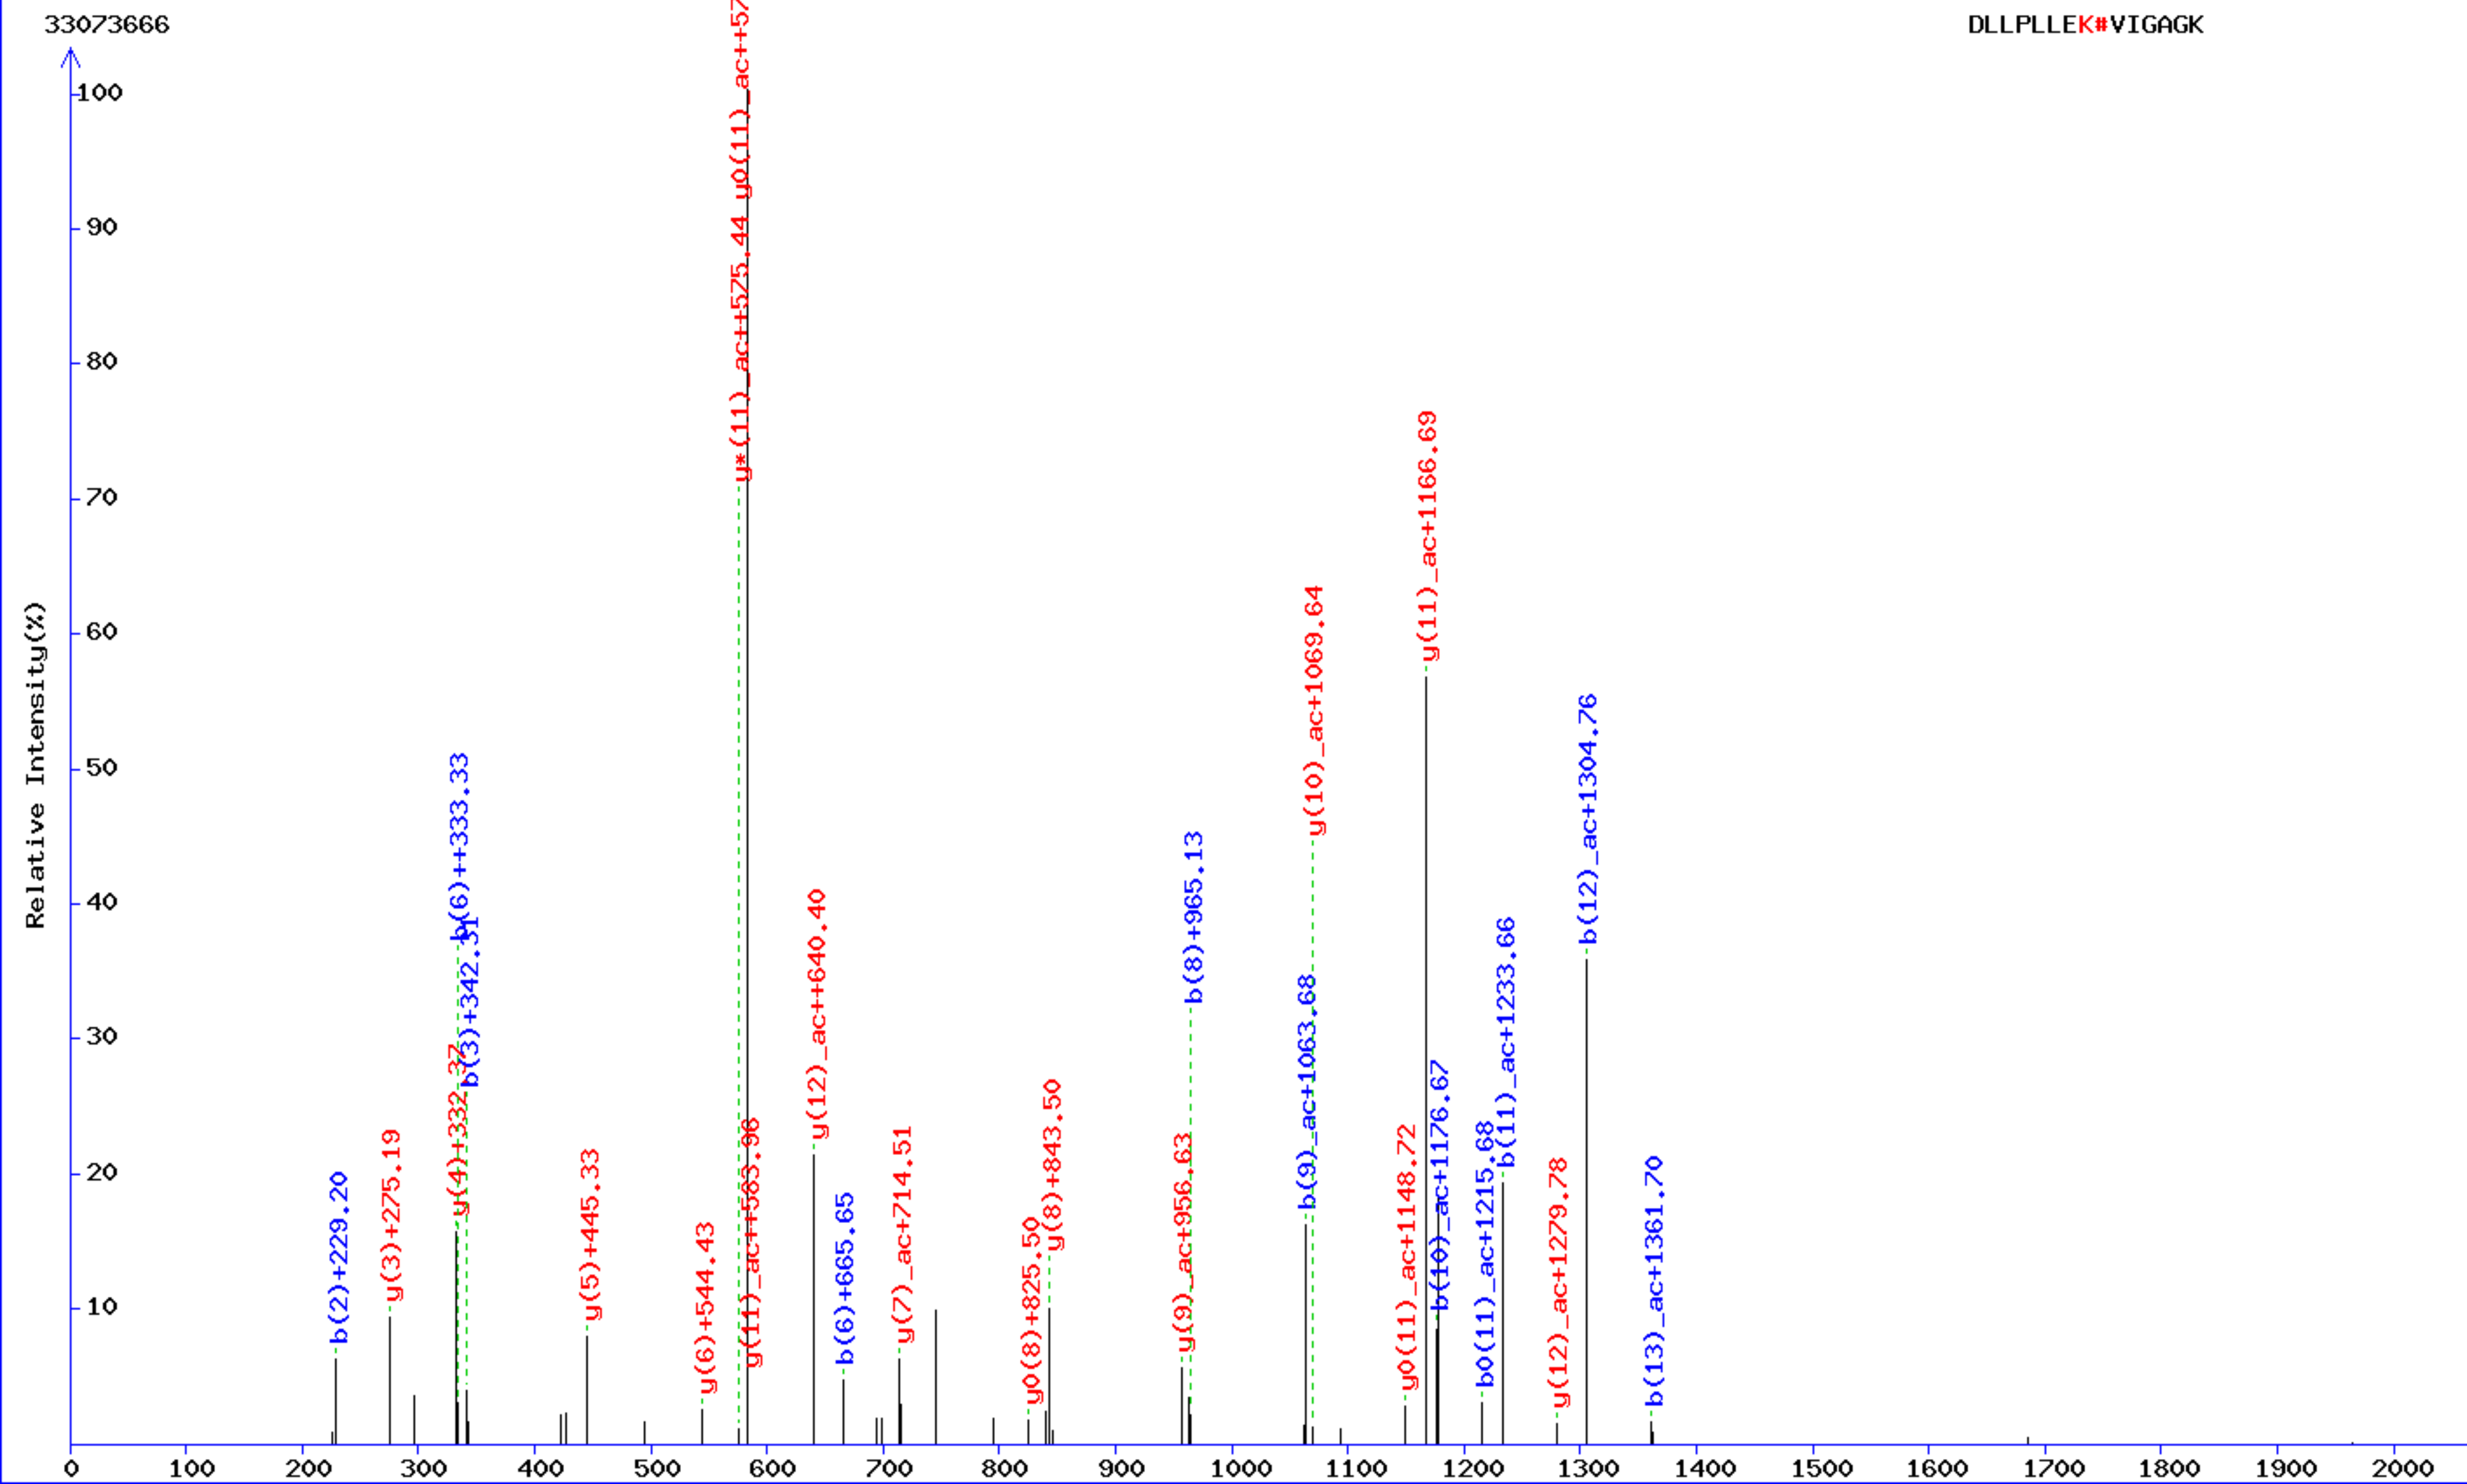

# gi|148660442 MRA\_0677 DNA-directed RNA polymerase subunit beta'

NEALVEIWK#EATDEVGQALR

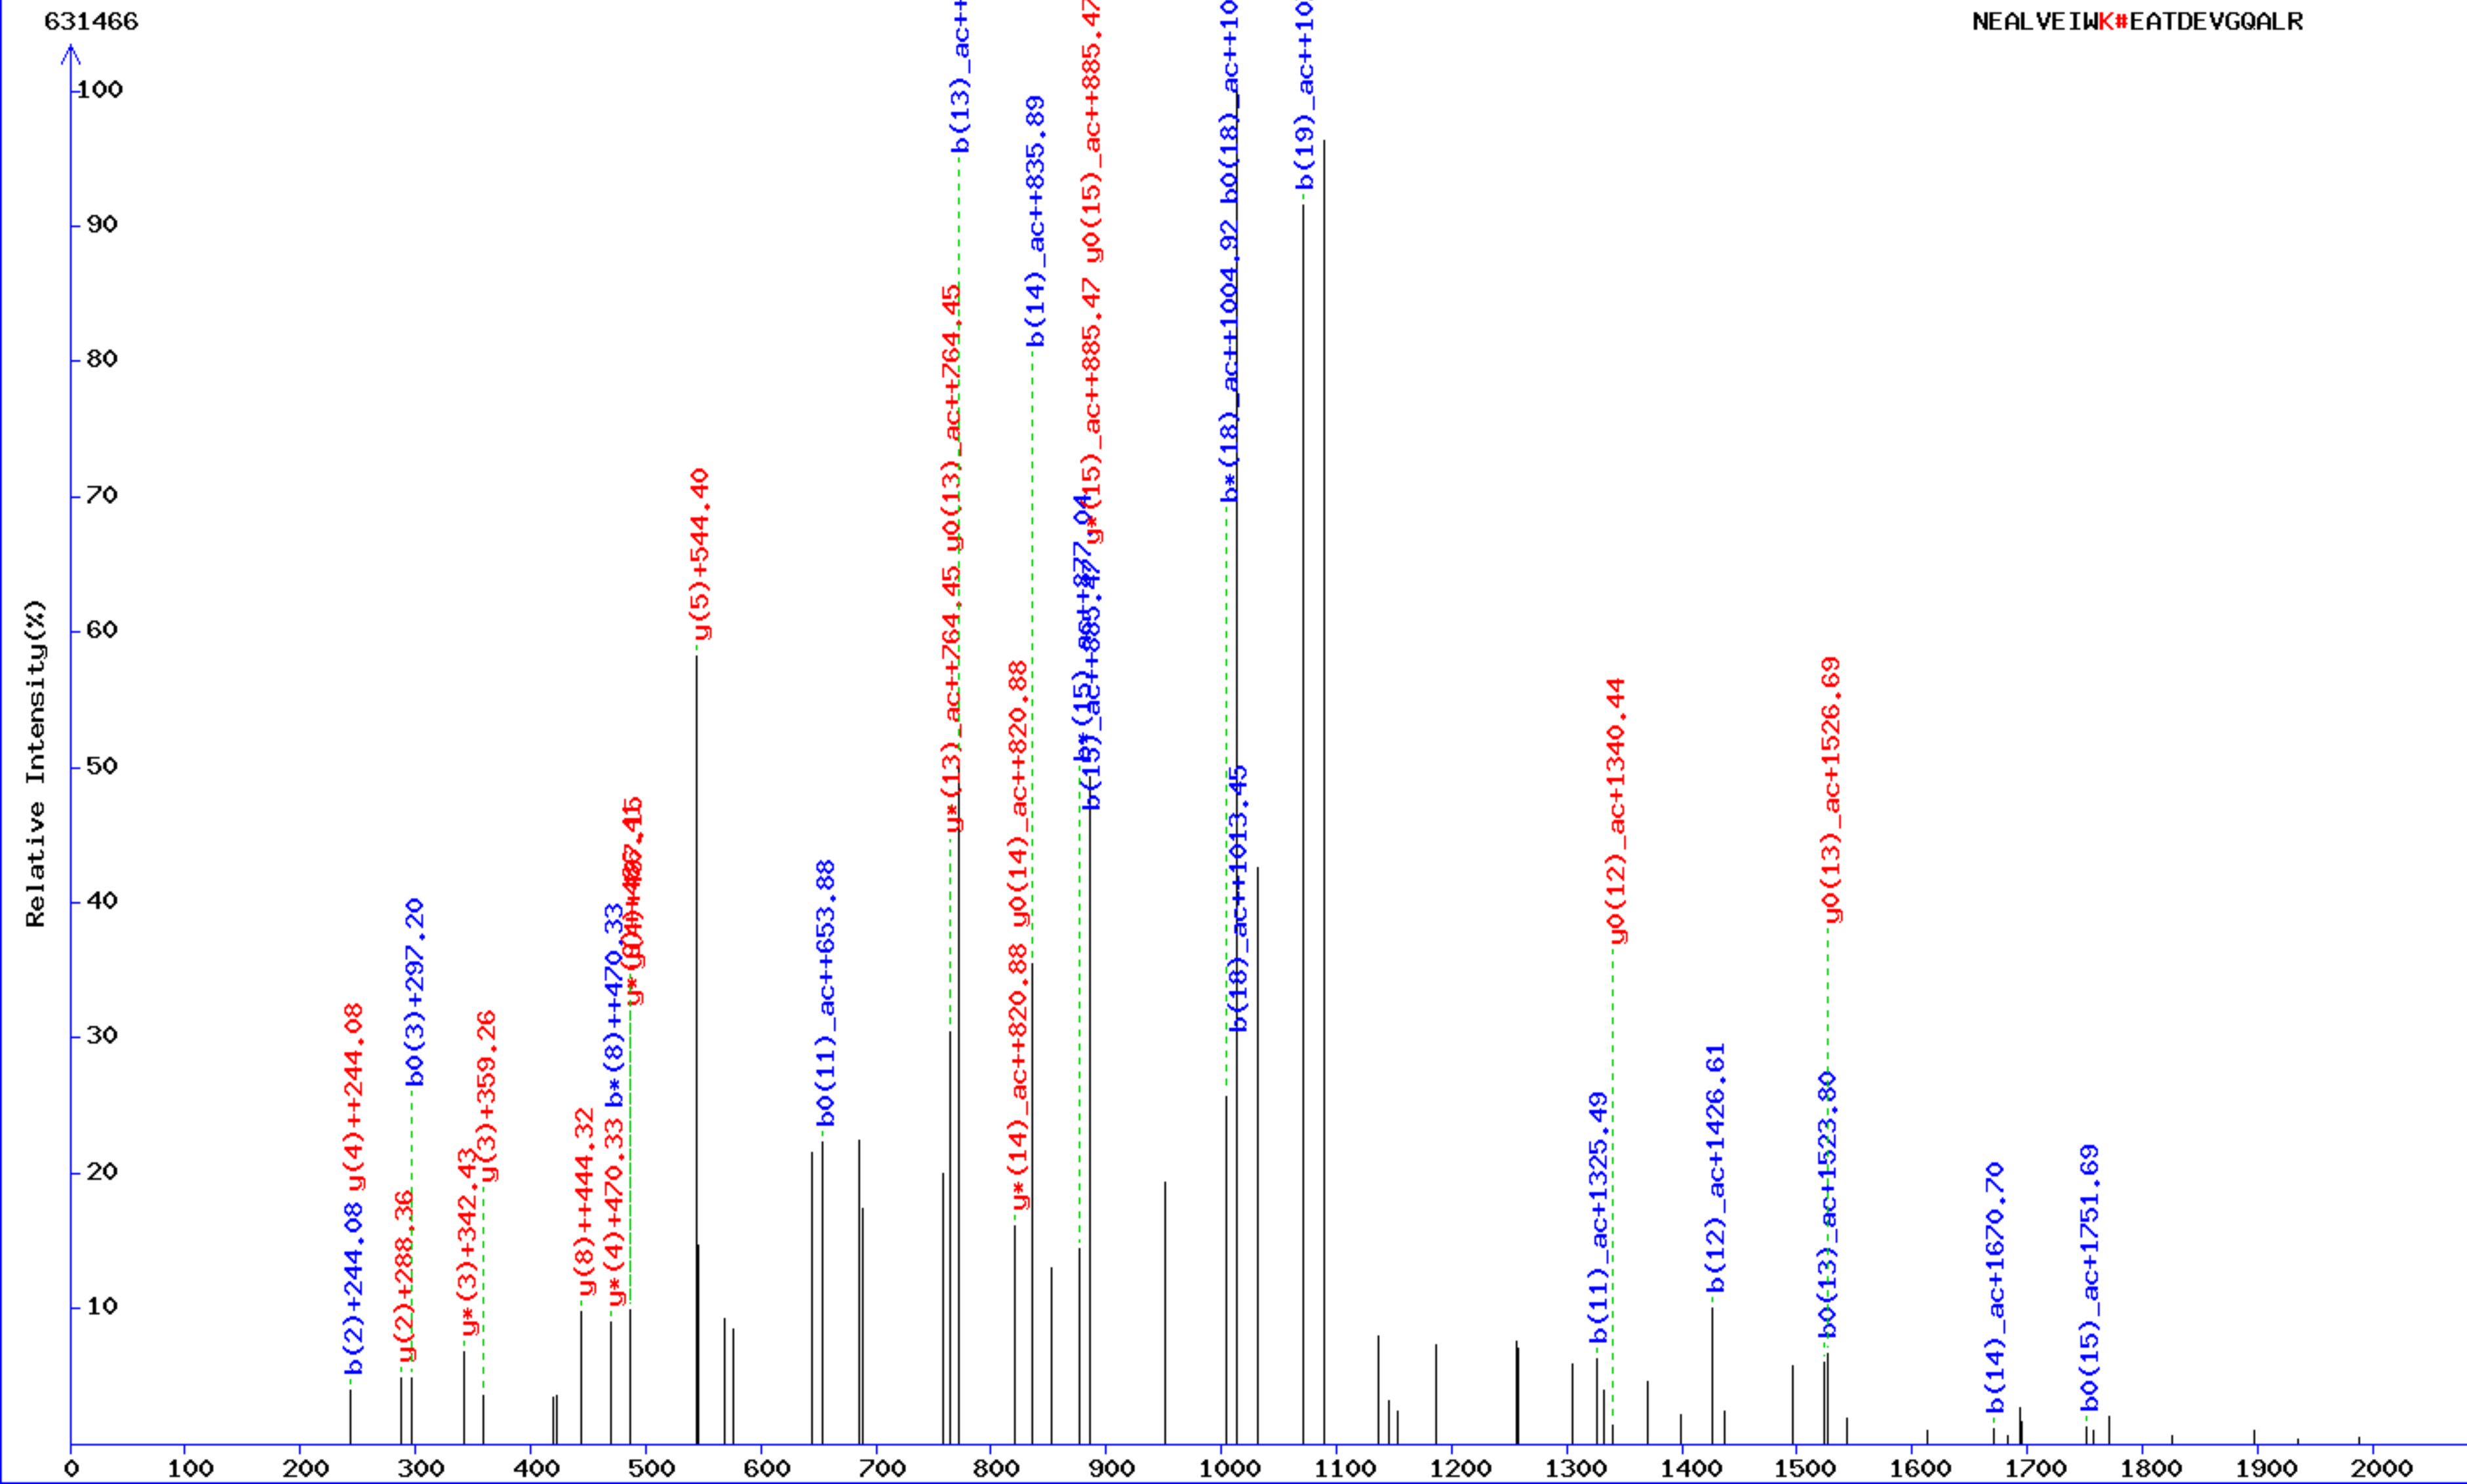

# gi|148663732 MRA\_3904 hypothetical protein

ADDGLAGVIDK#IFG

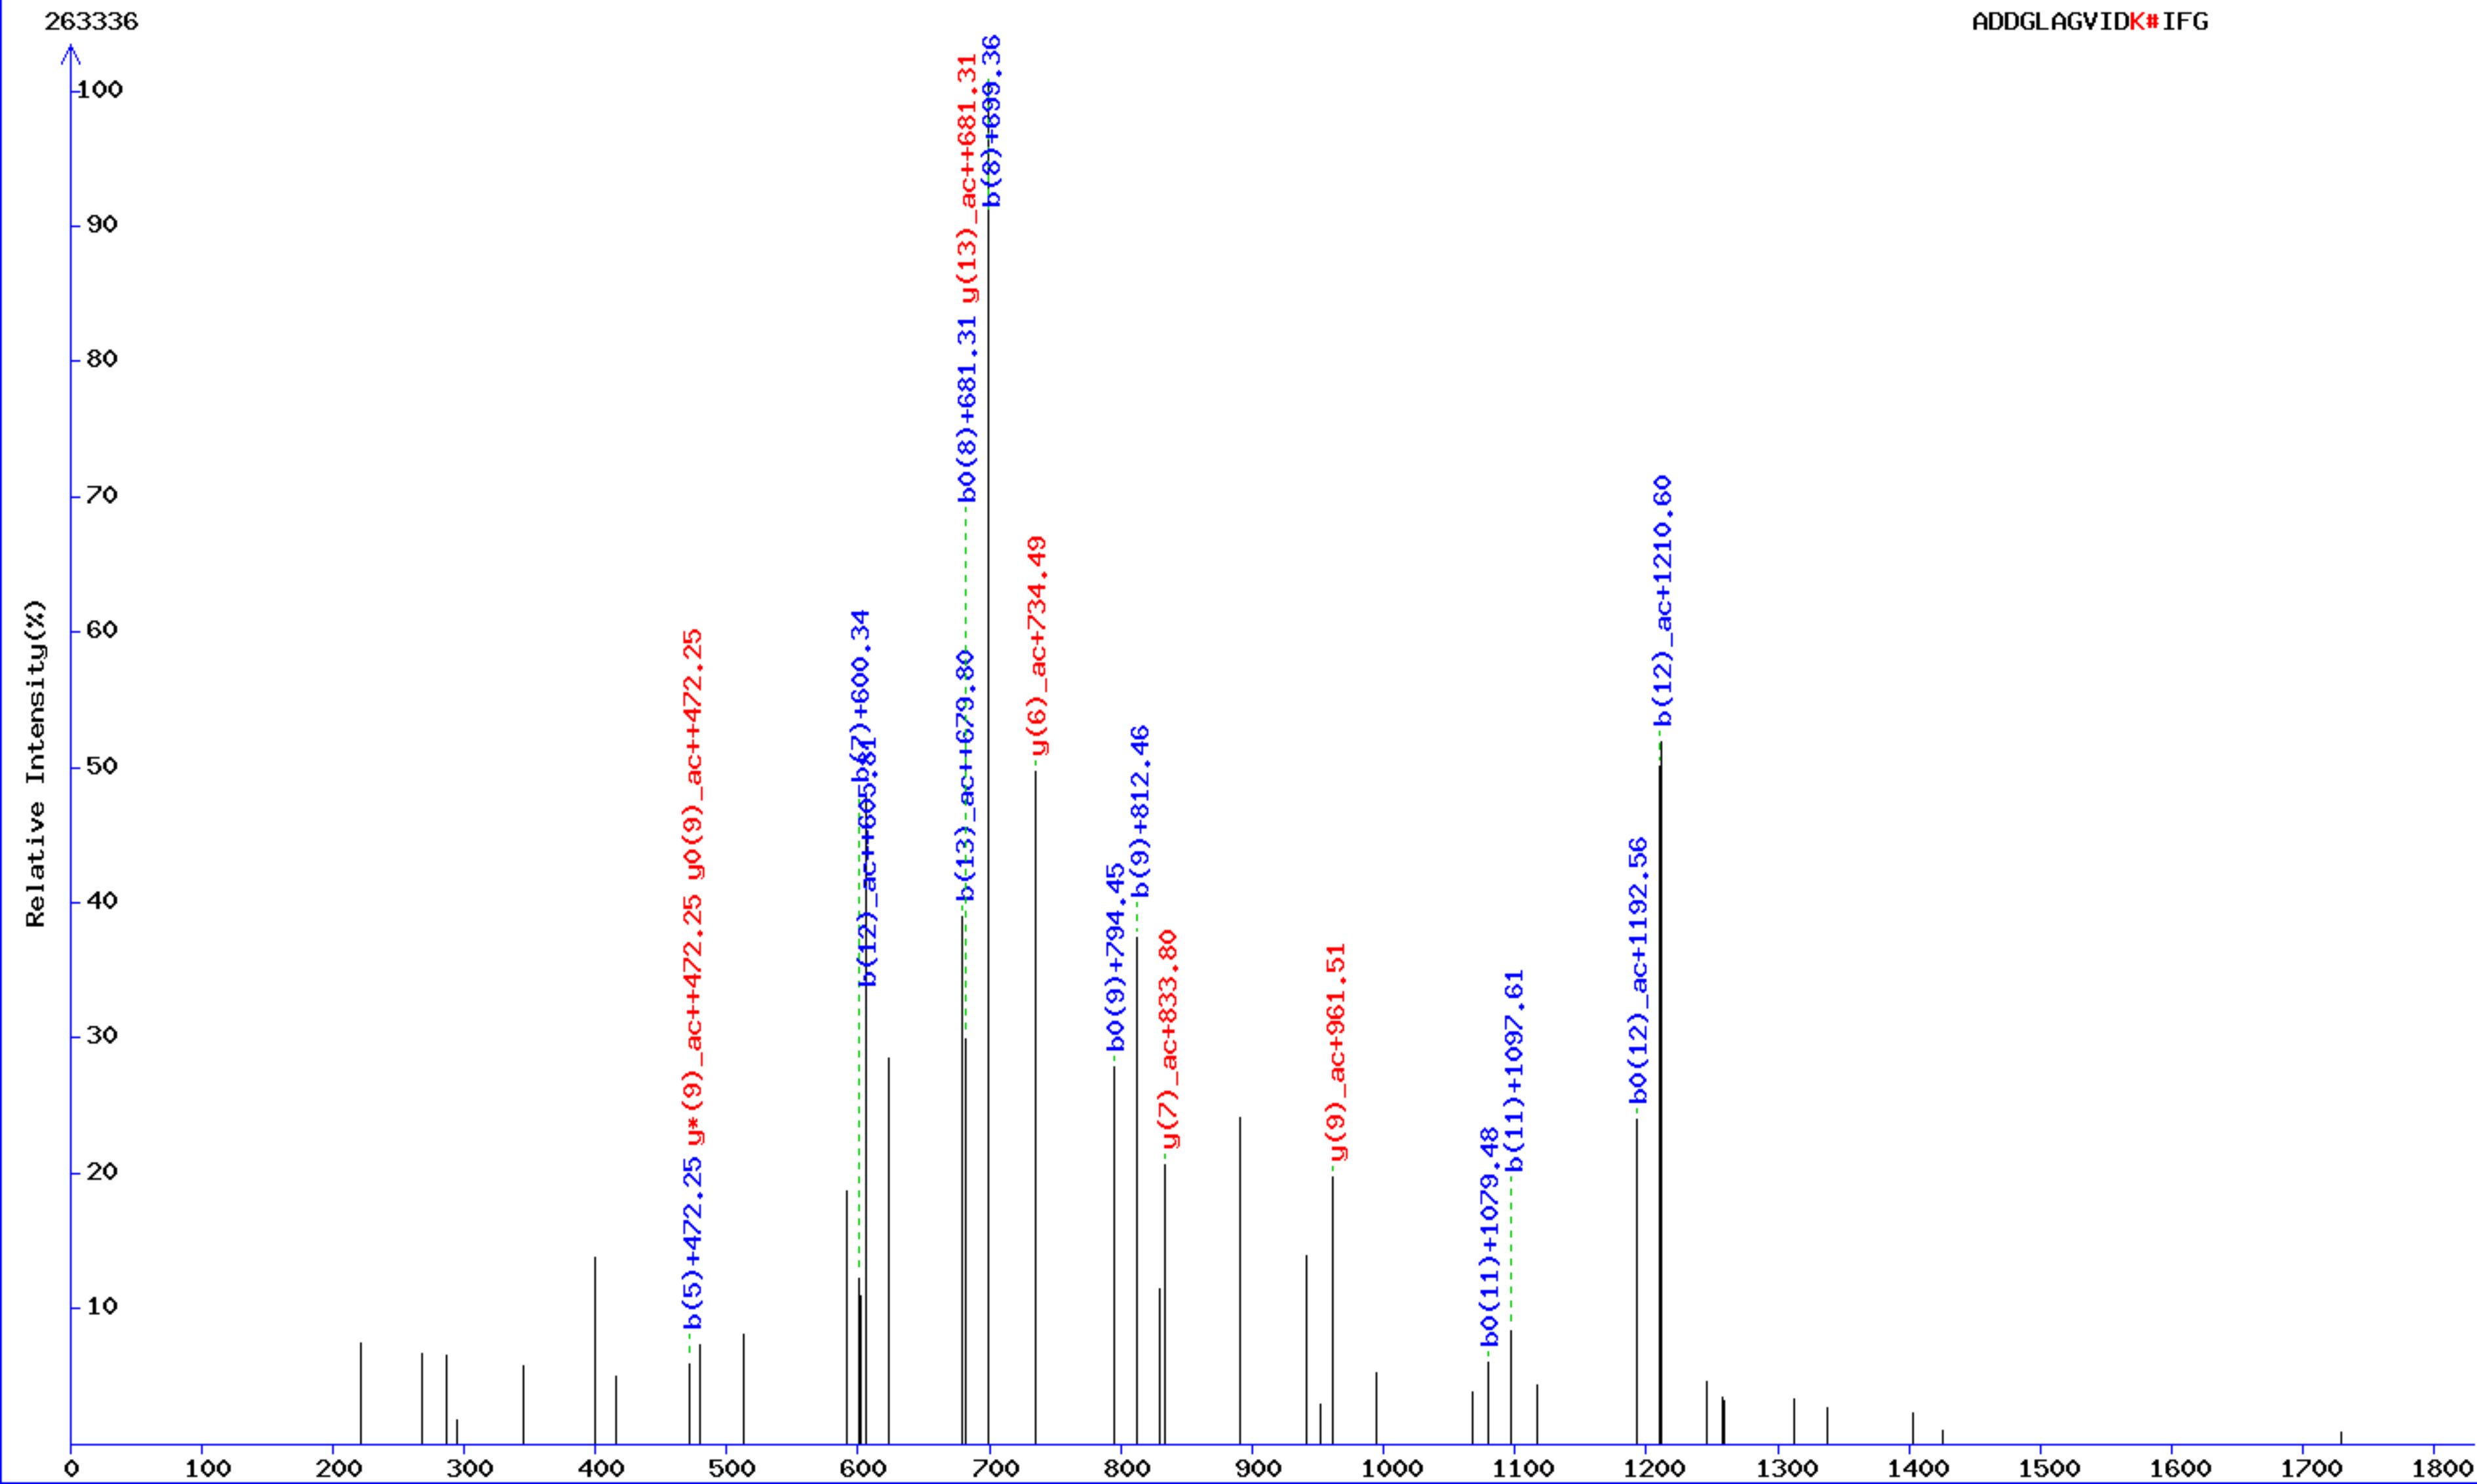

# gi|148660205 MRA\_0445 molecular chaperone GroEL

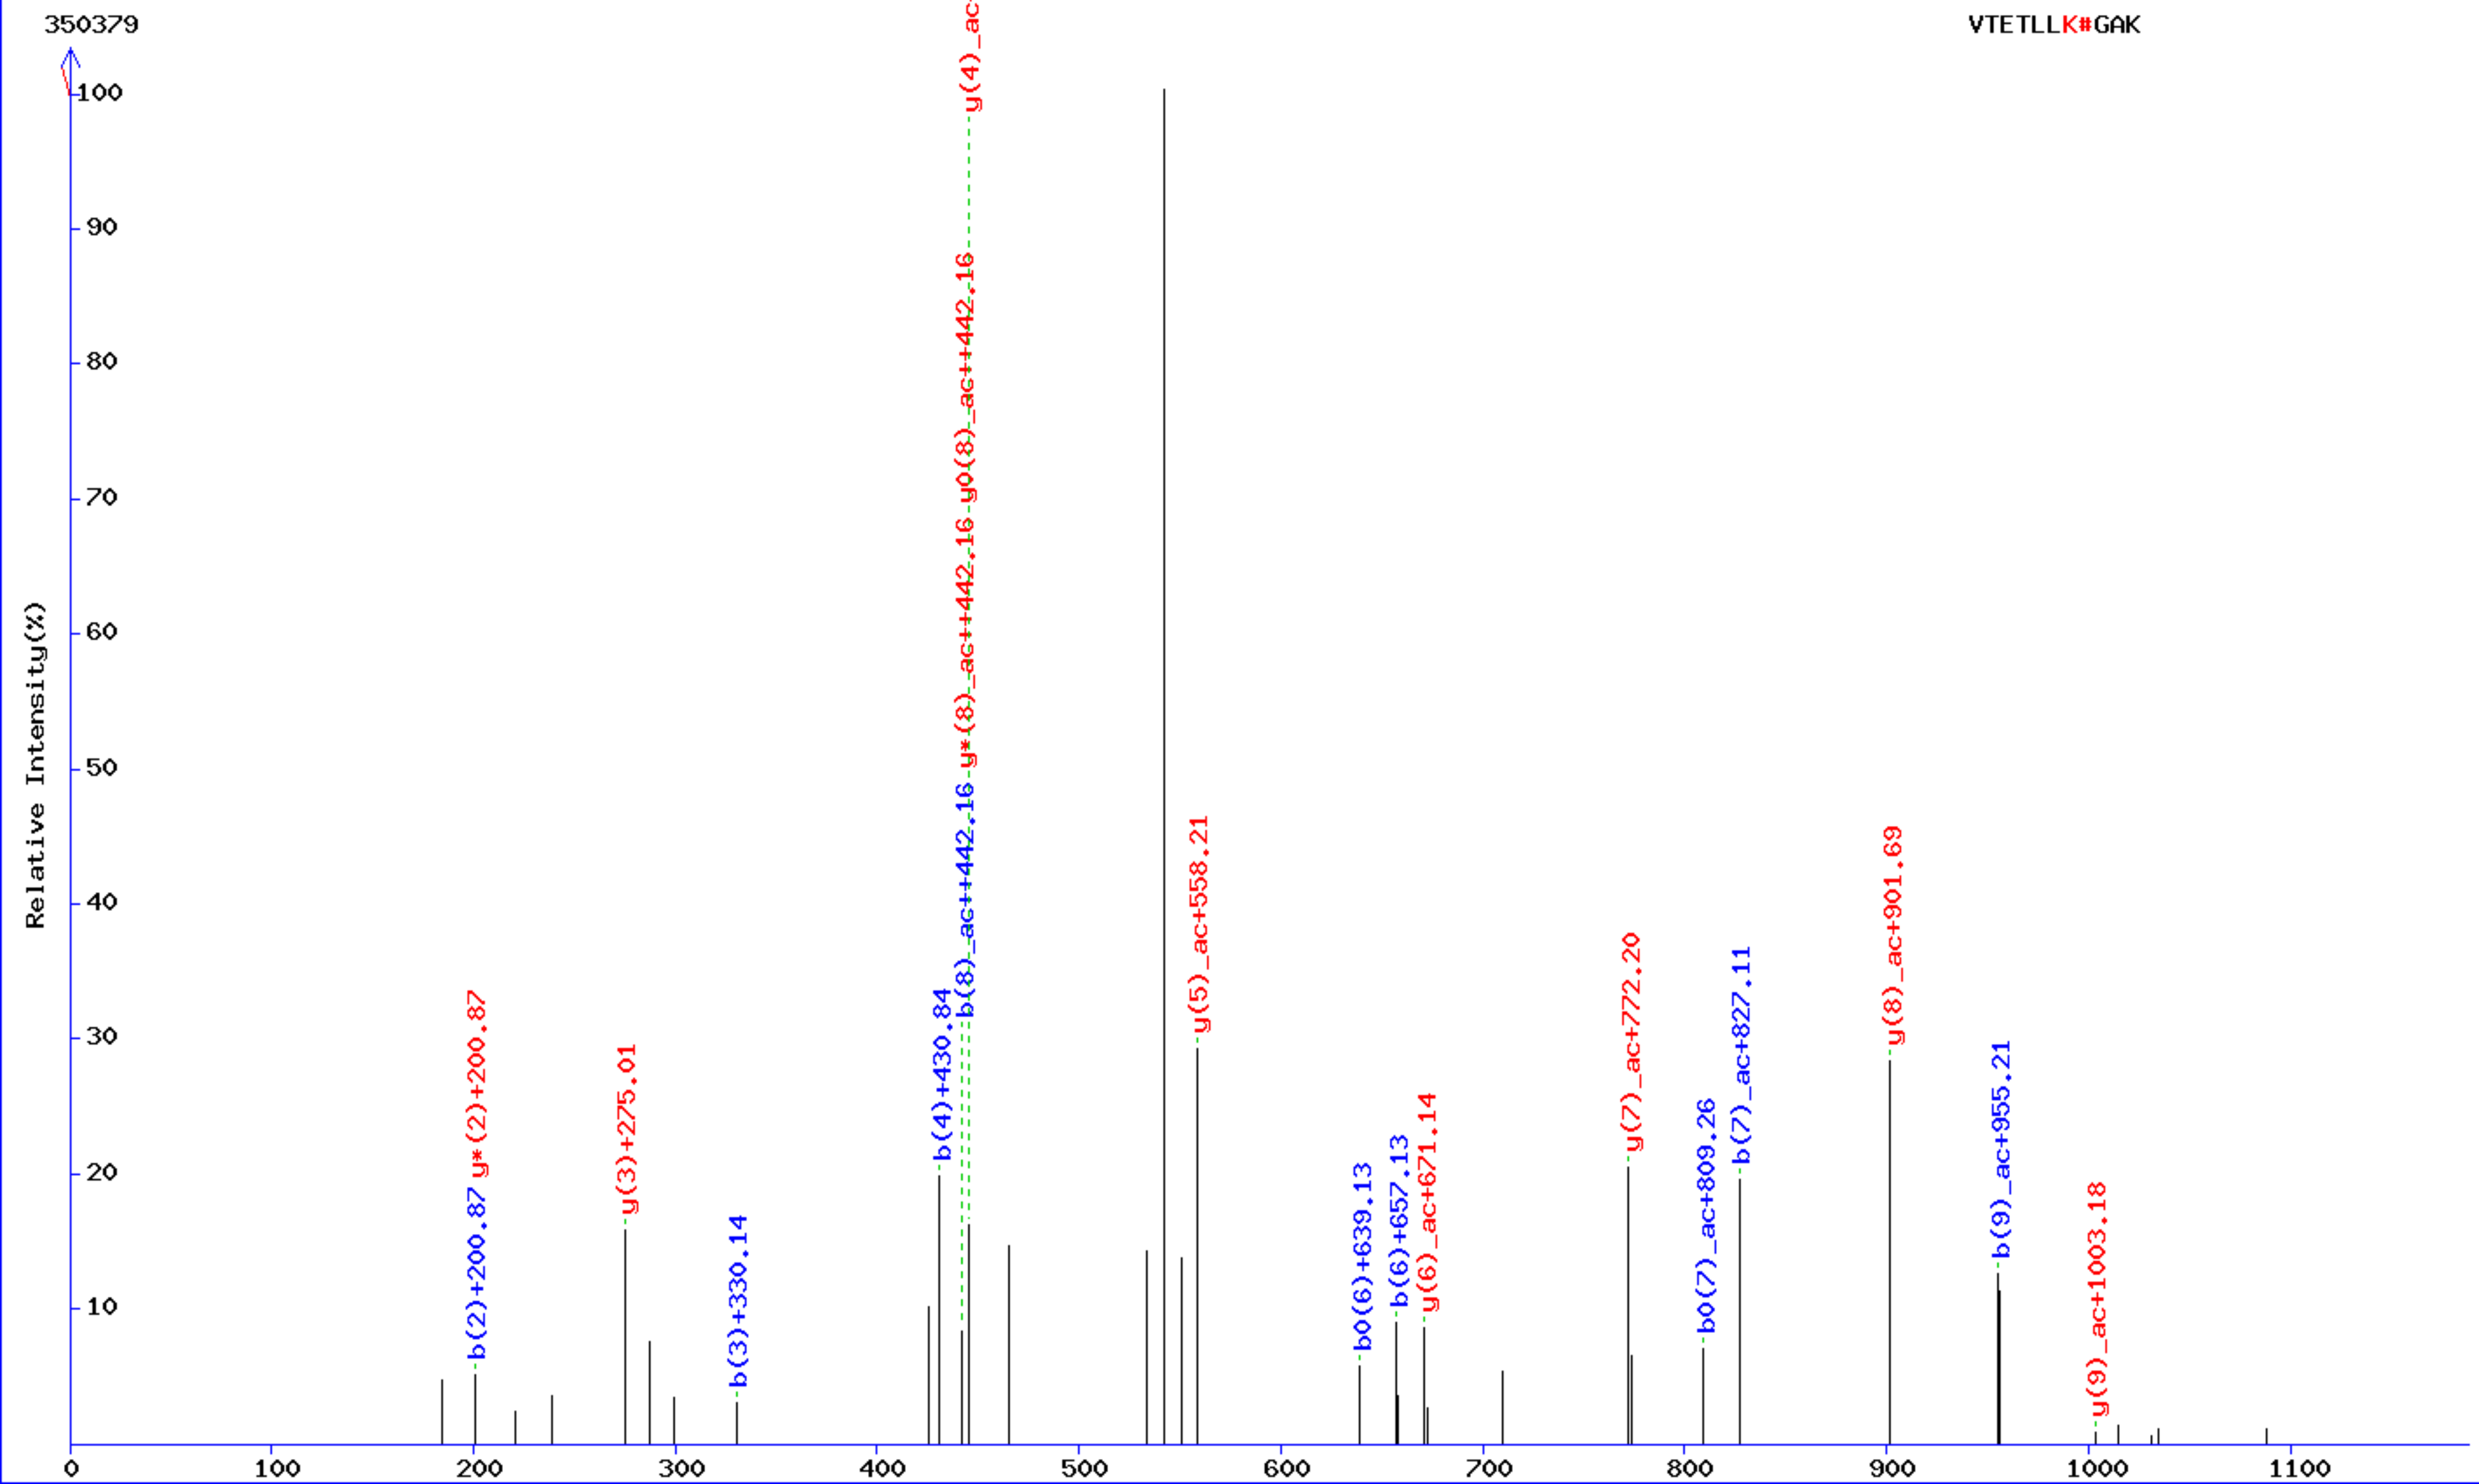

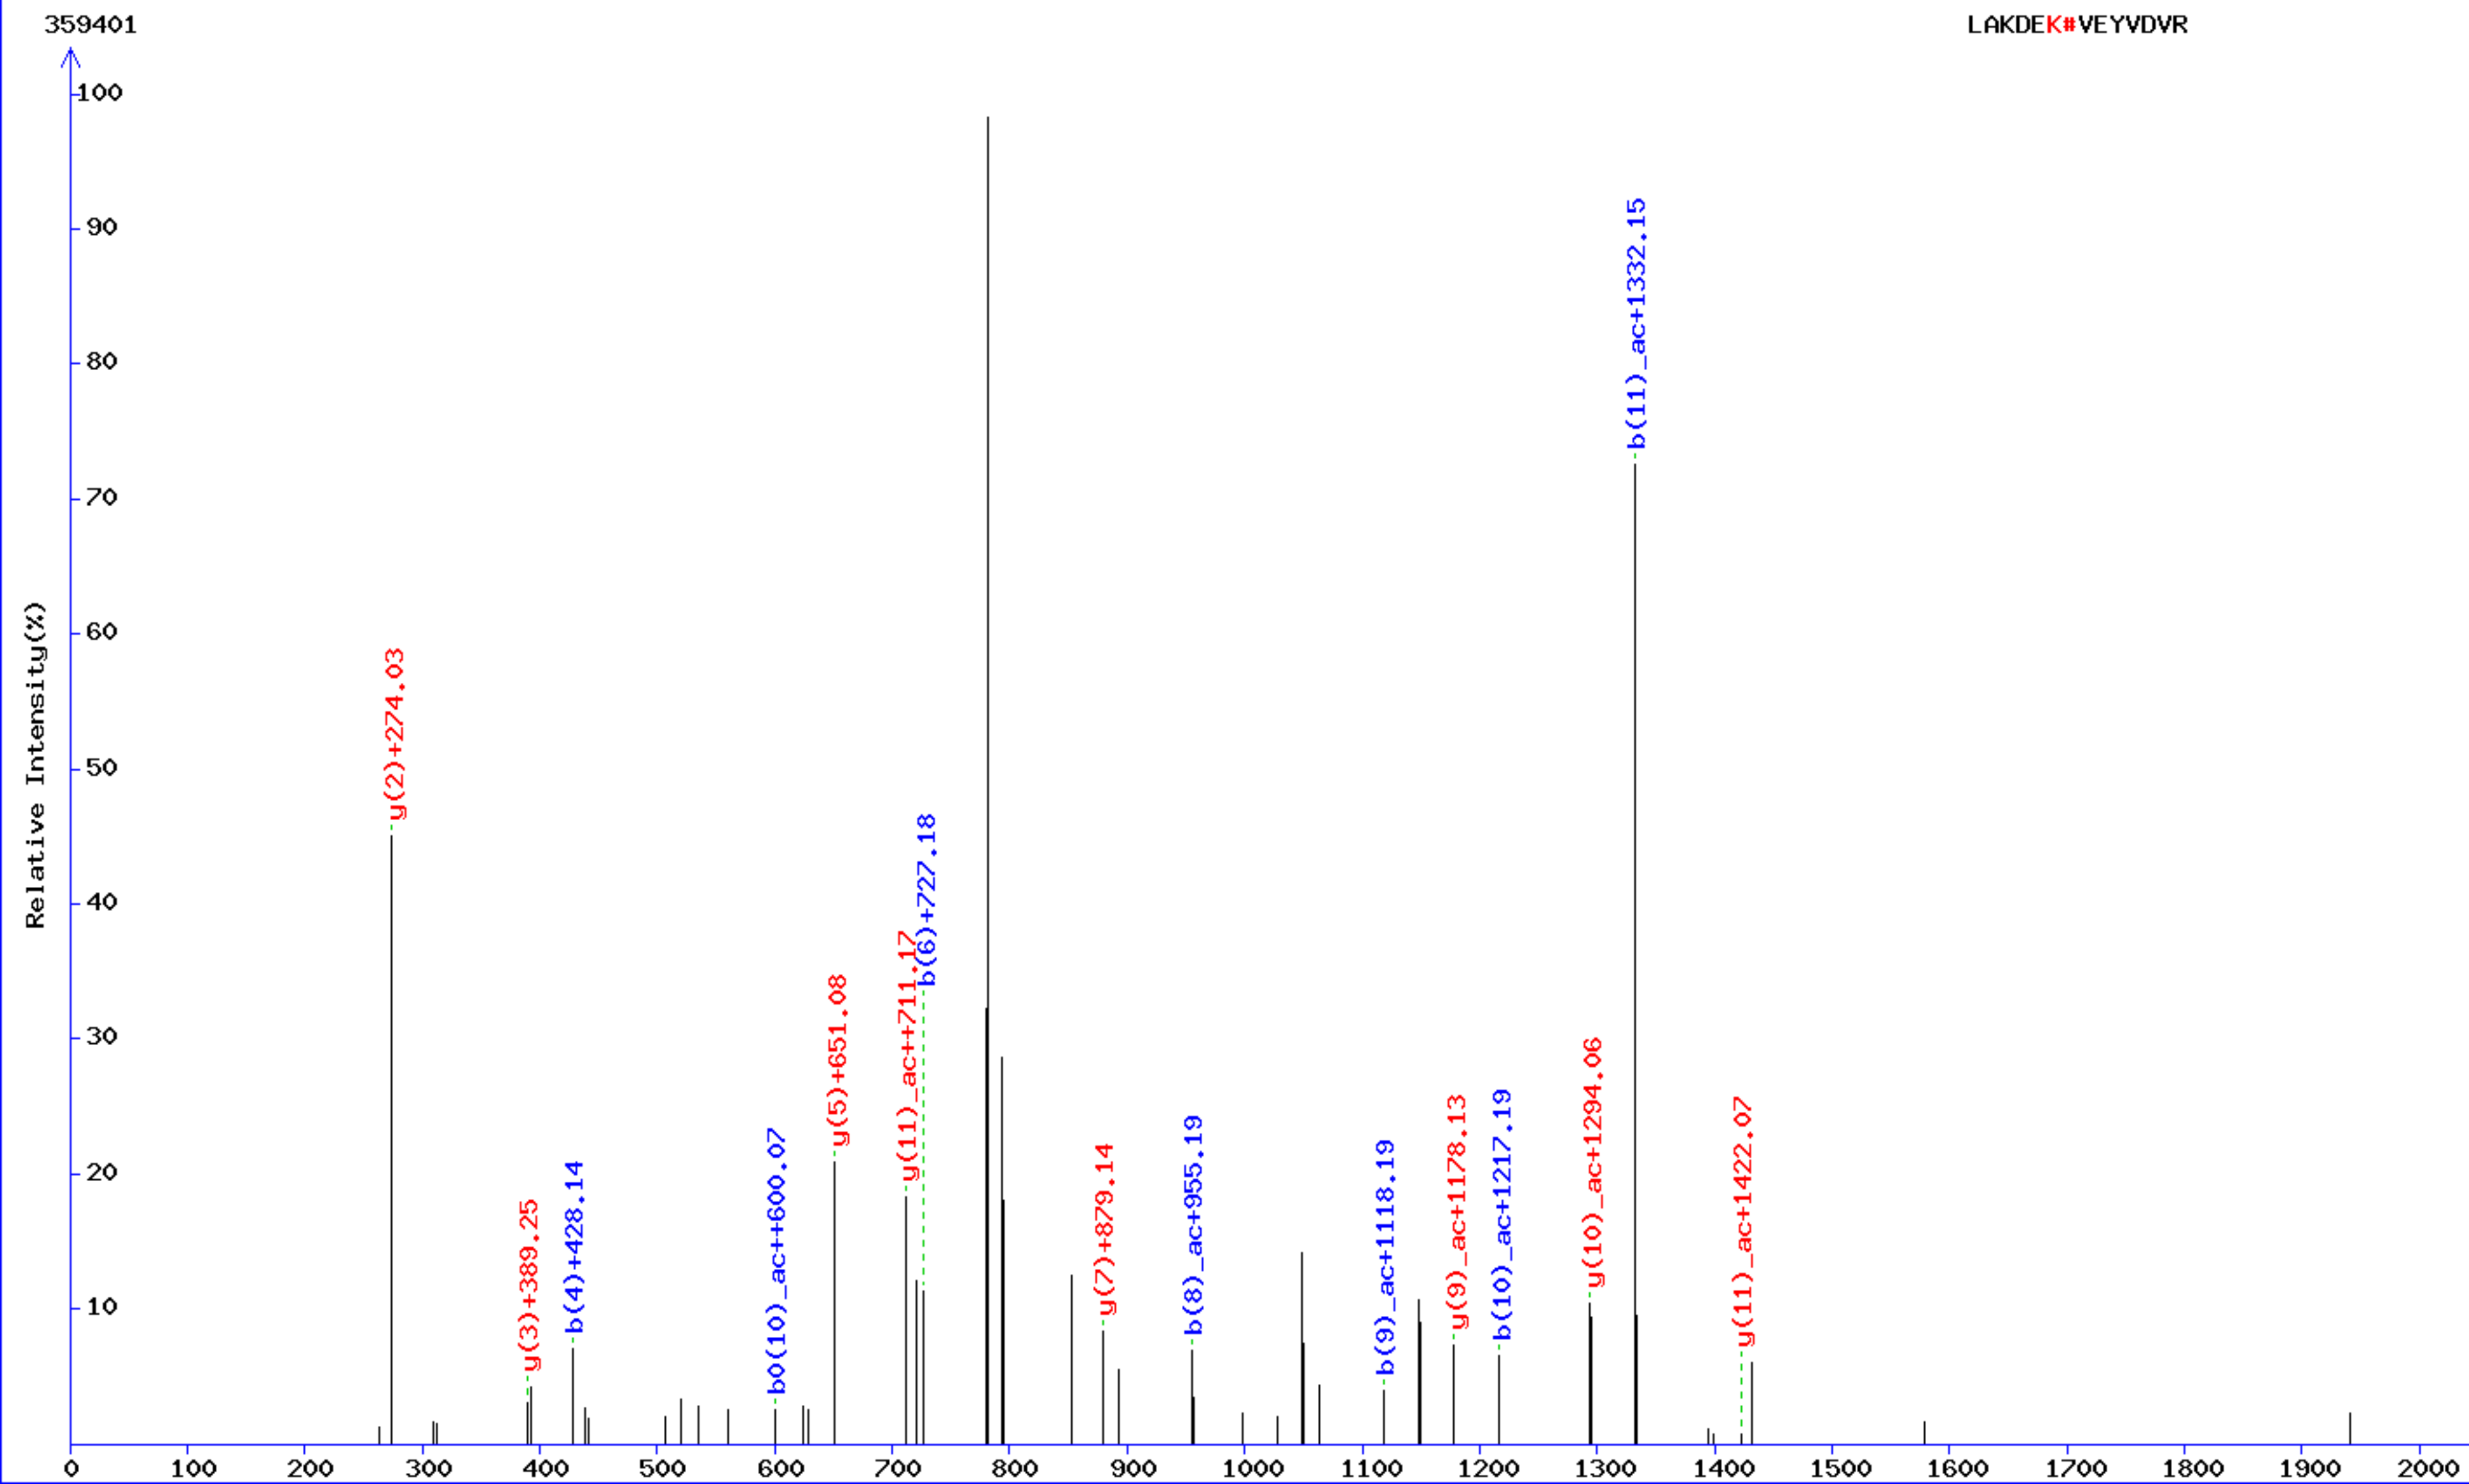



# gi|148660205 MRA\_0445 molecular chaperone GroEL

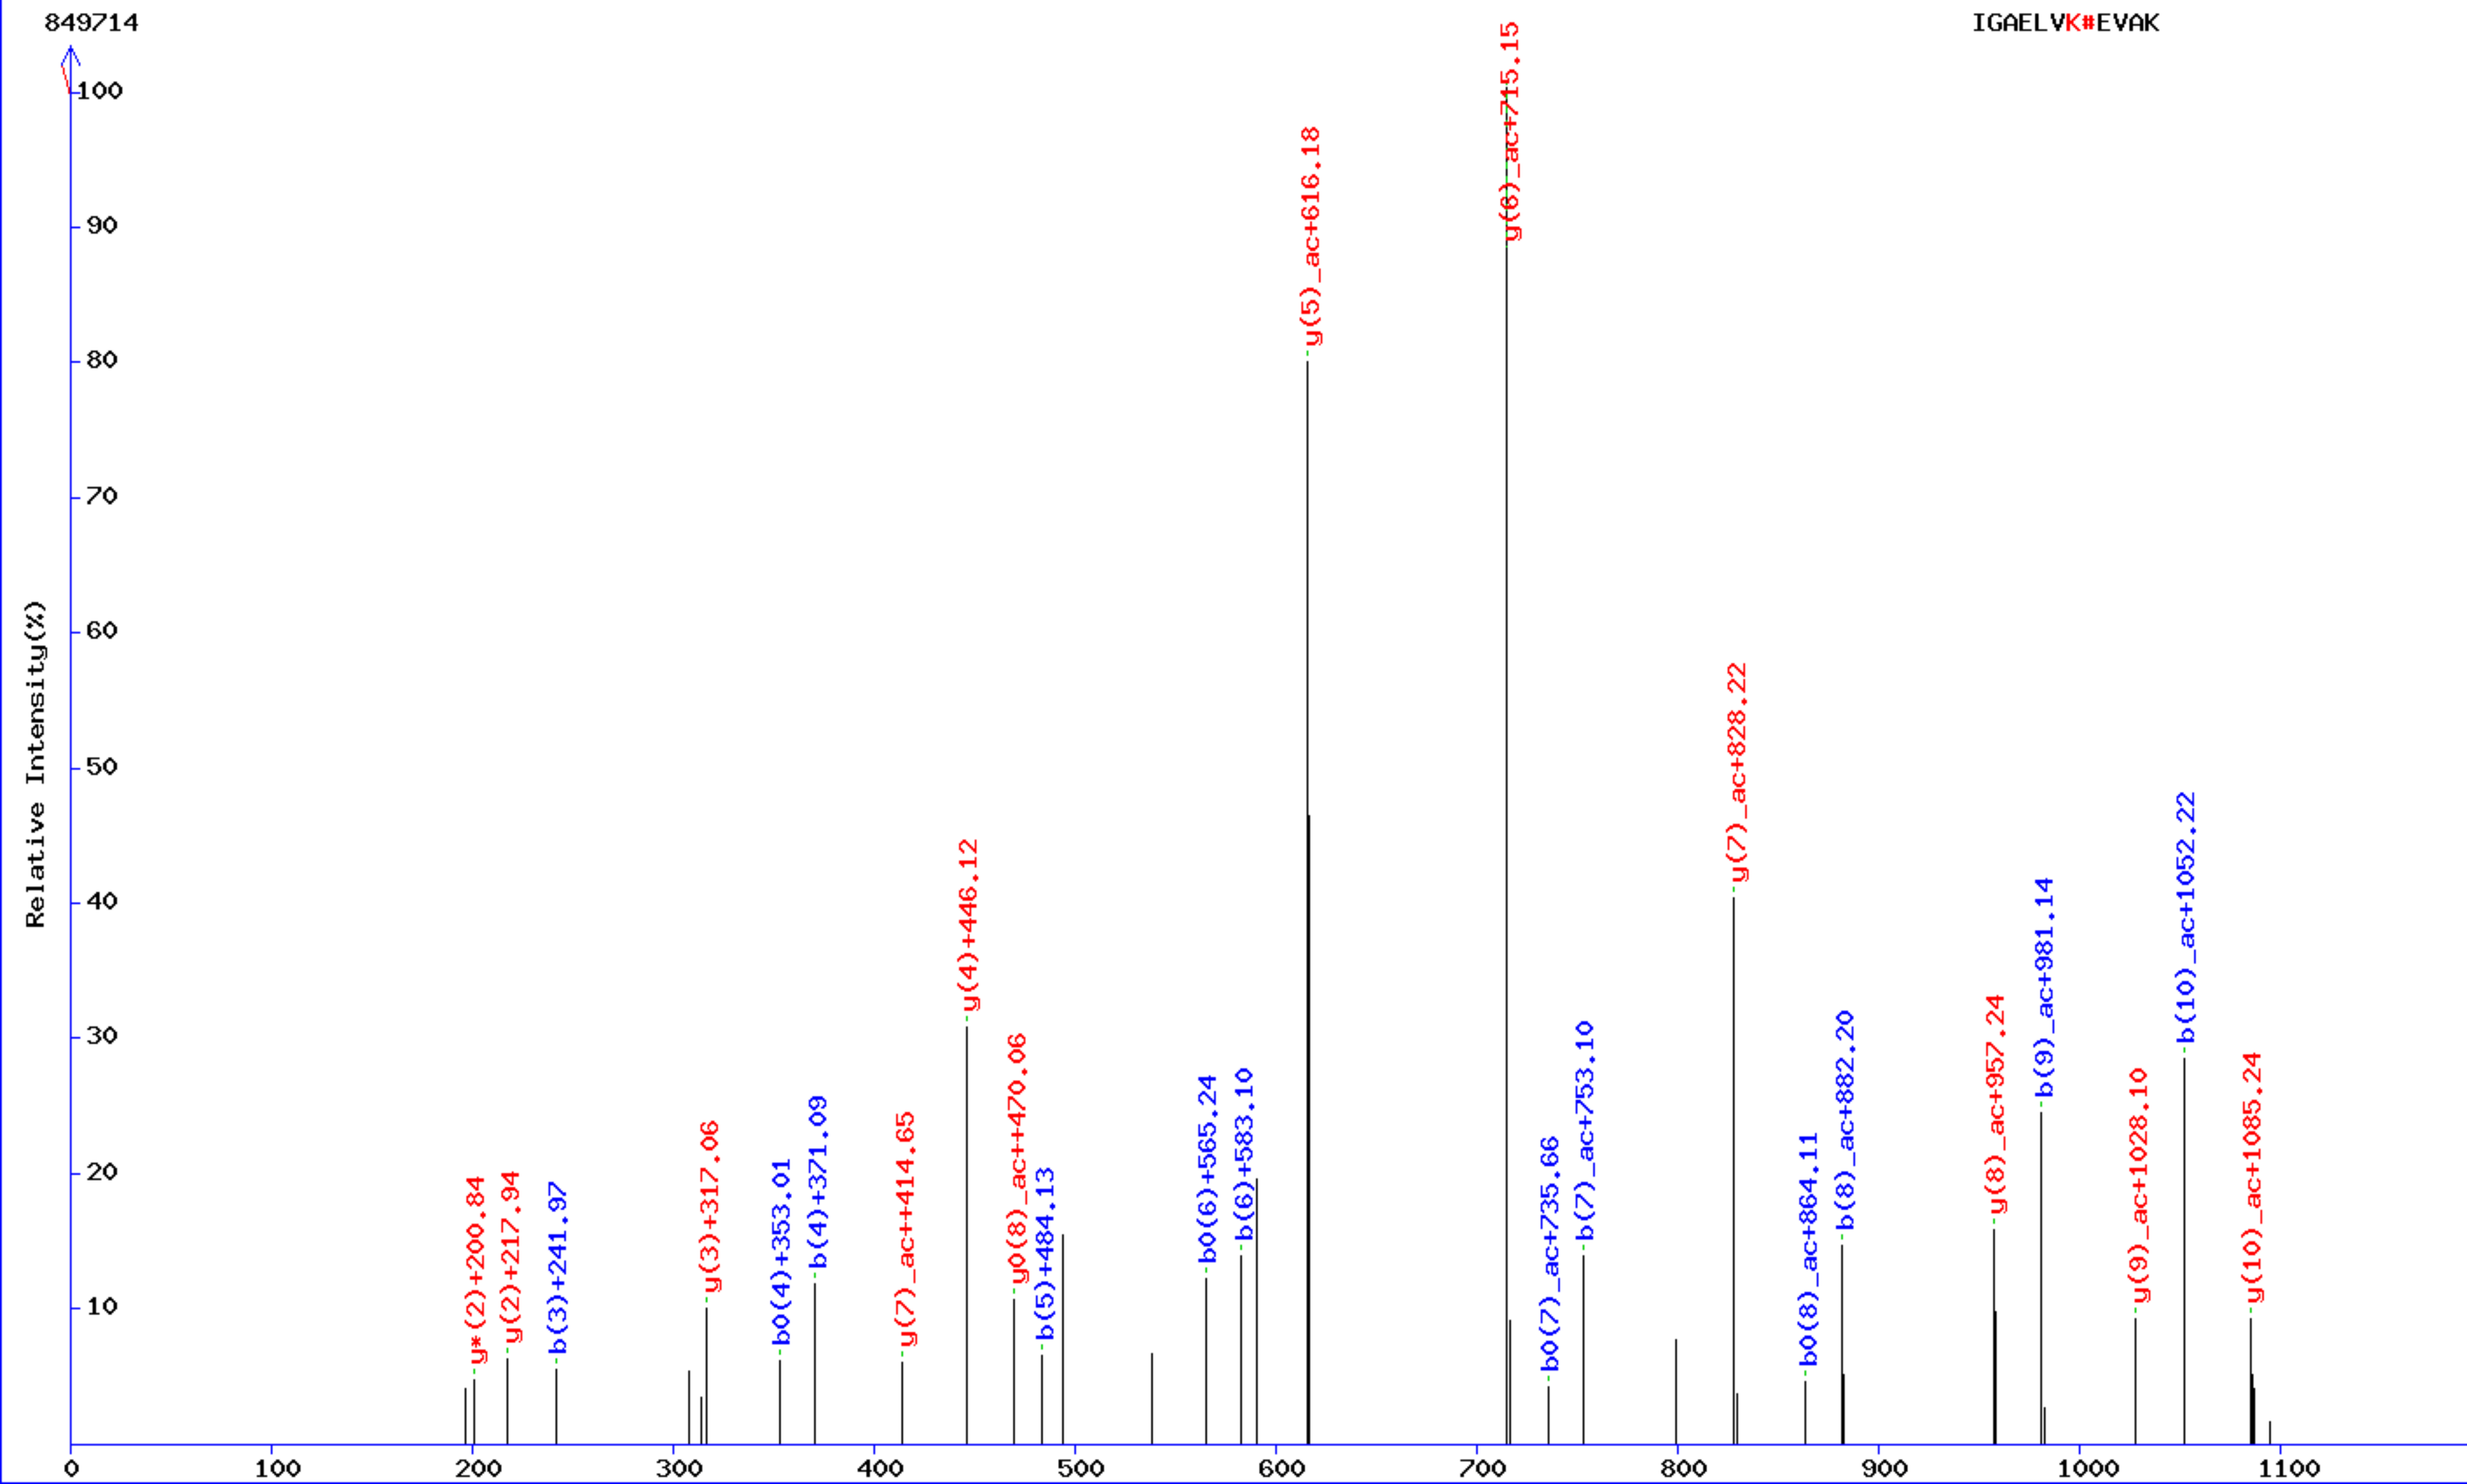

# gi|148660116 MRA\_0359 molecular chaperone DnaK

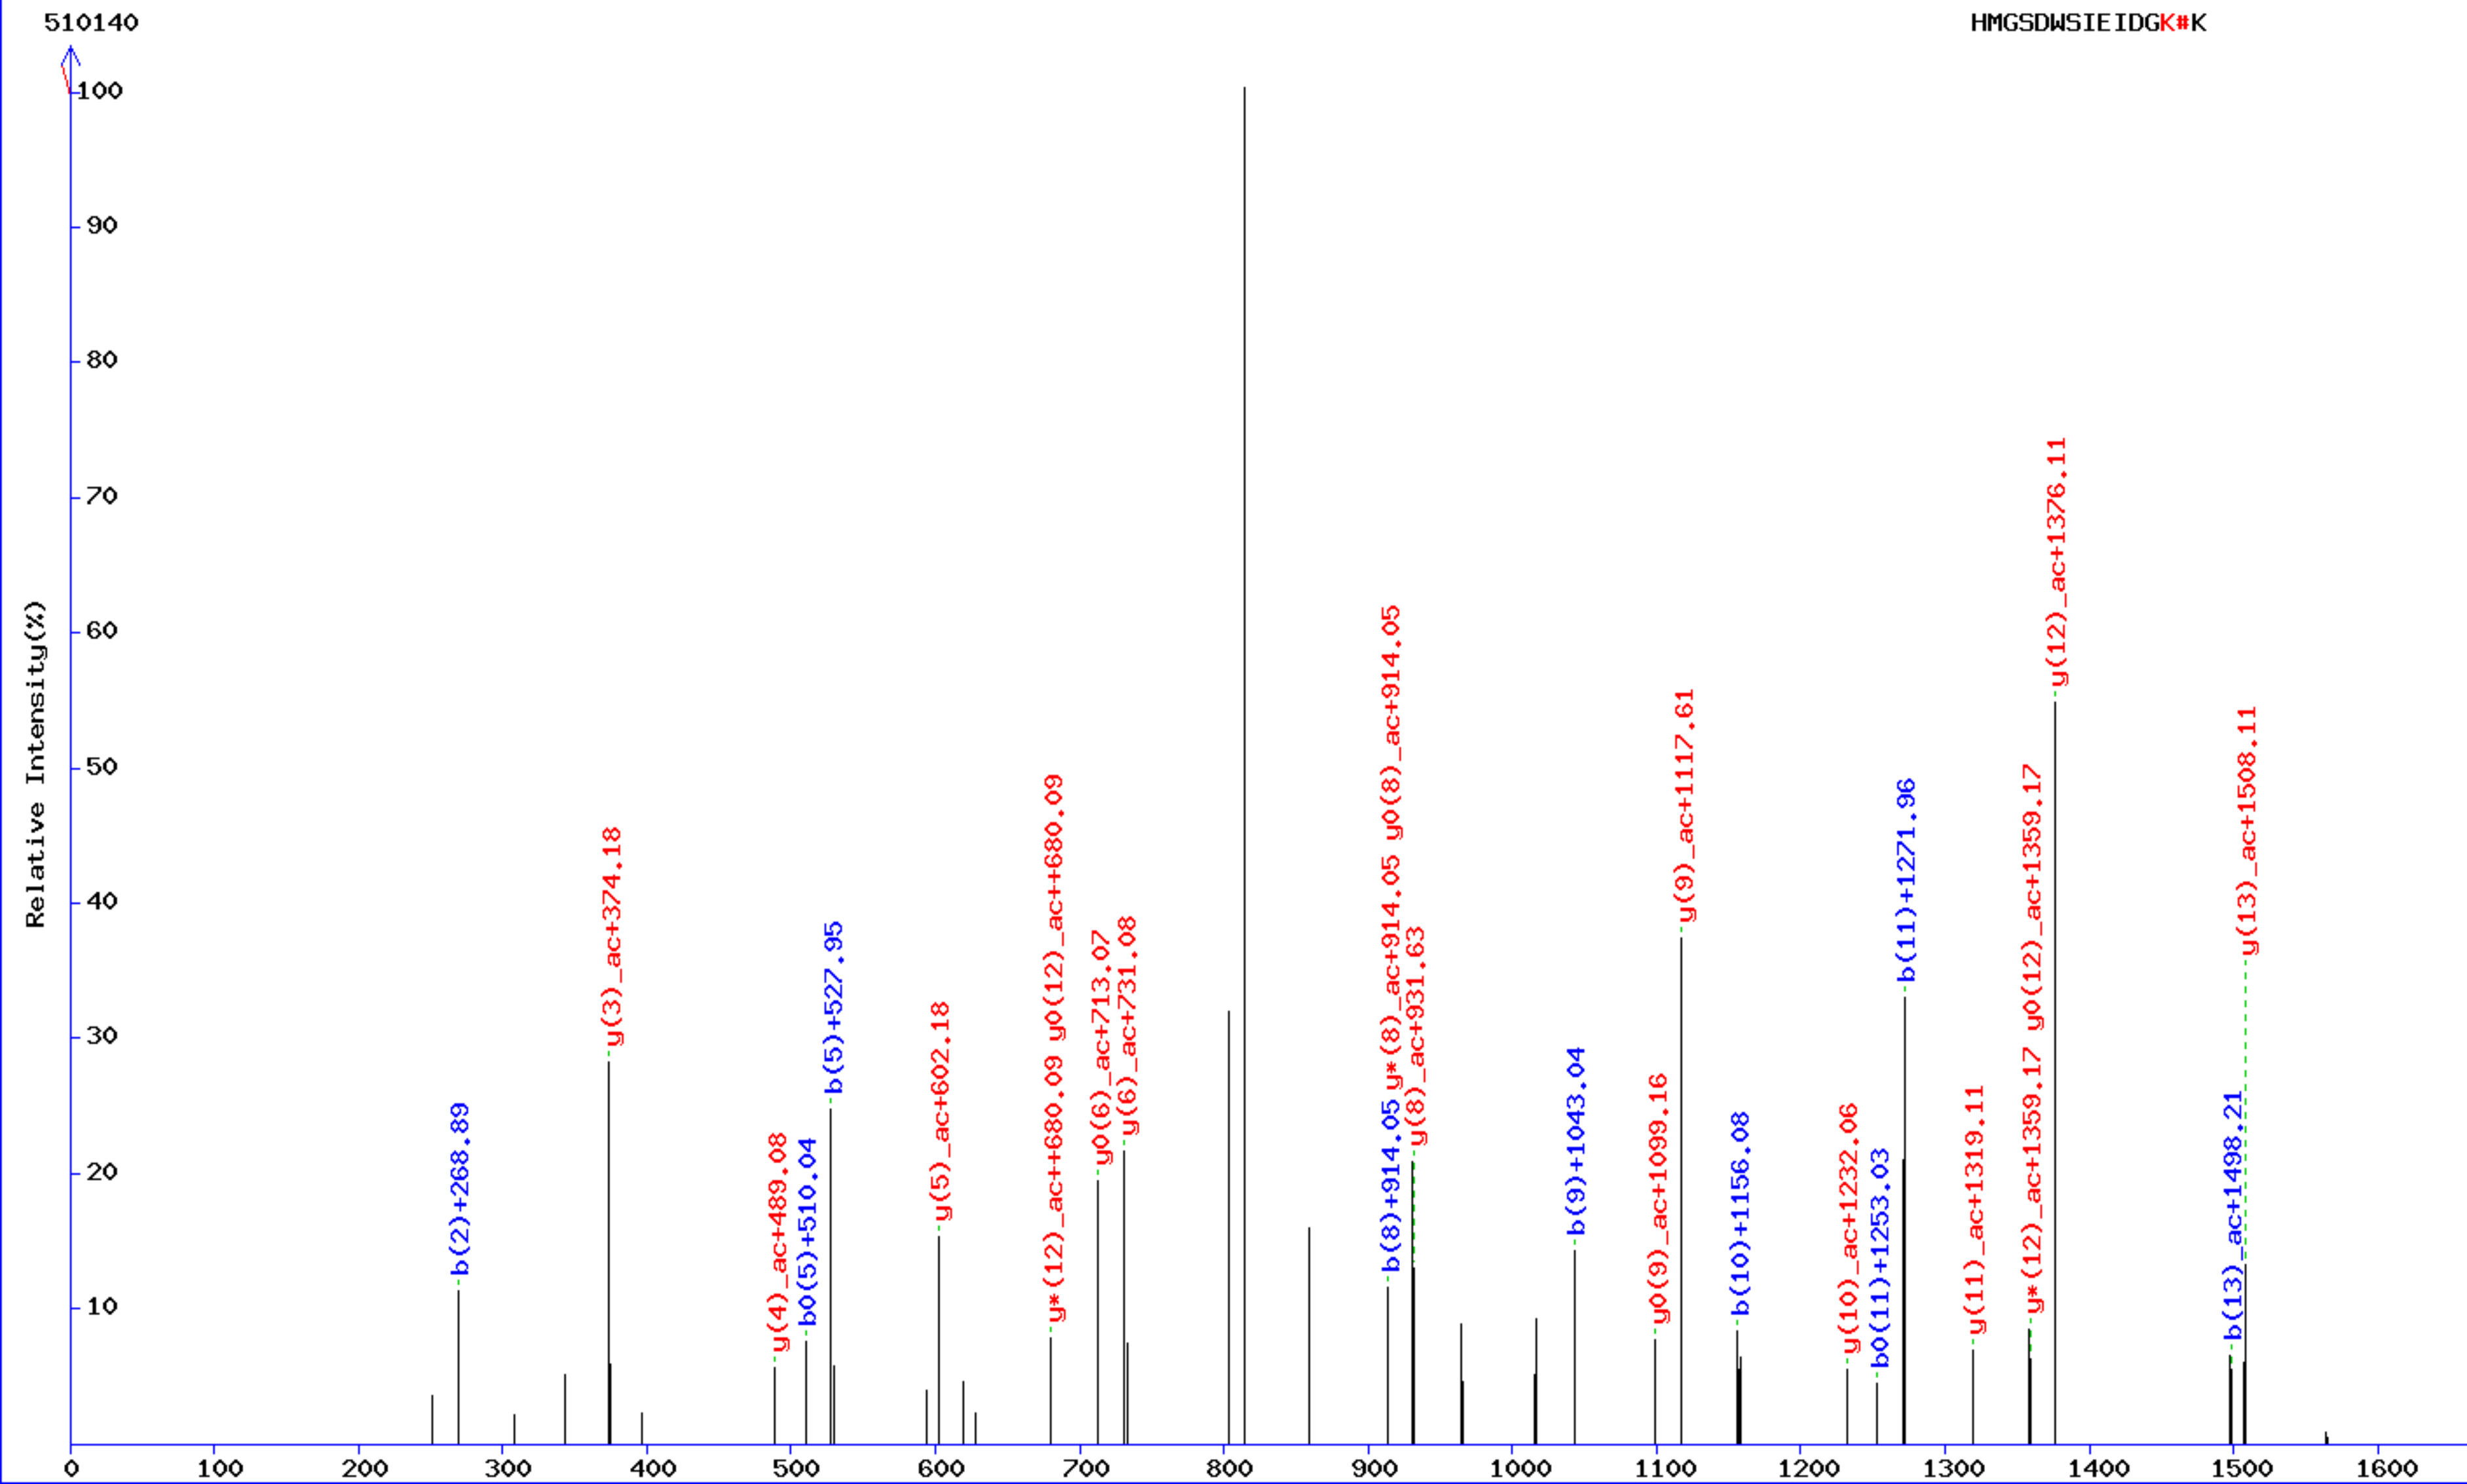

HMGSDWSIEIDGK#K

# gi|148660205 MRA\_0445 molecular chaperone GroEL

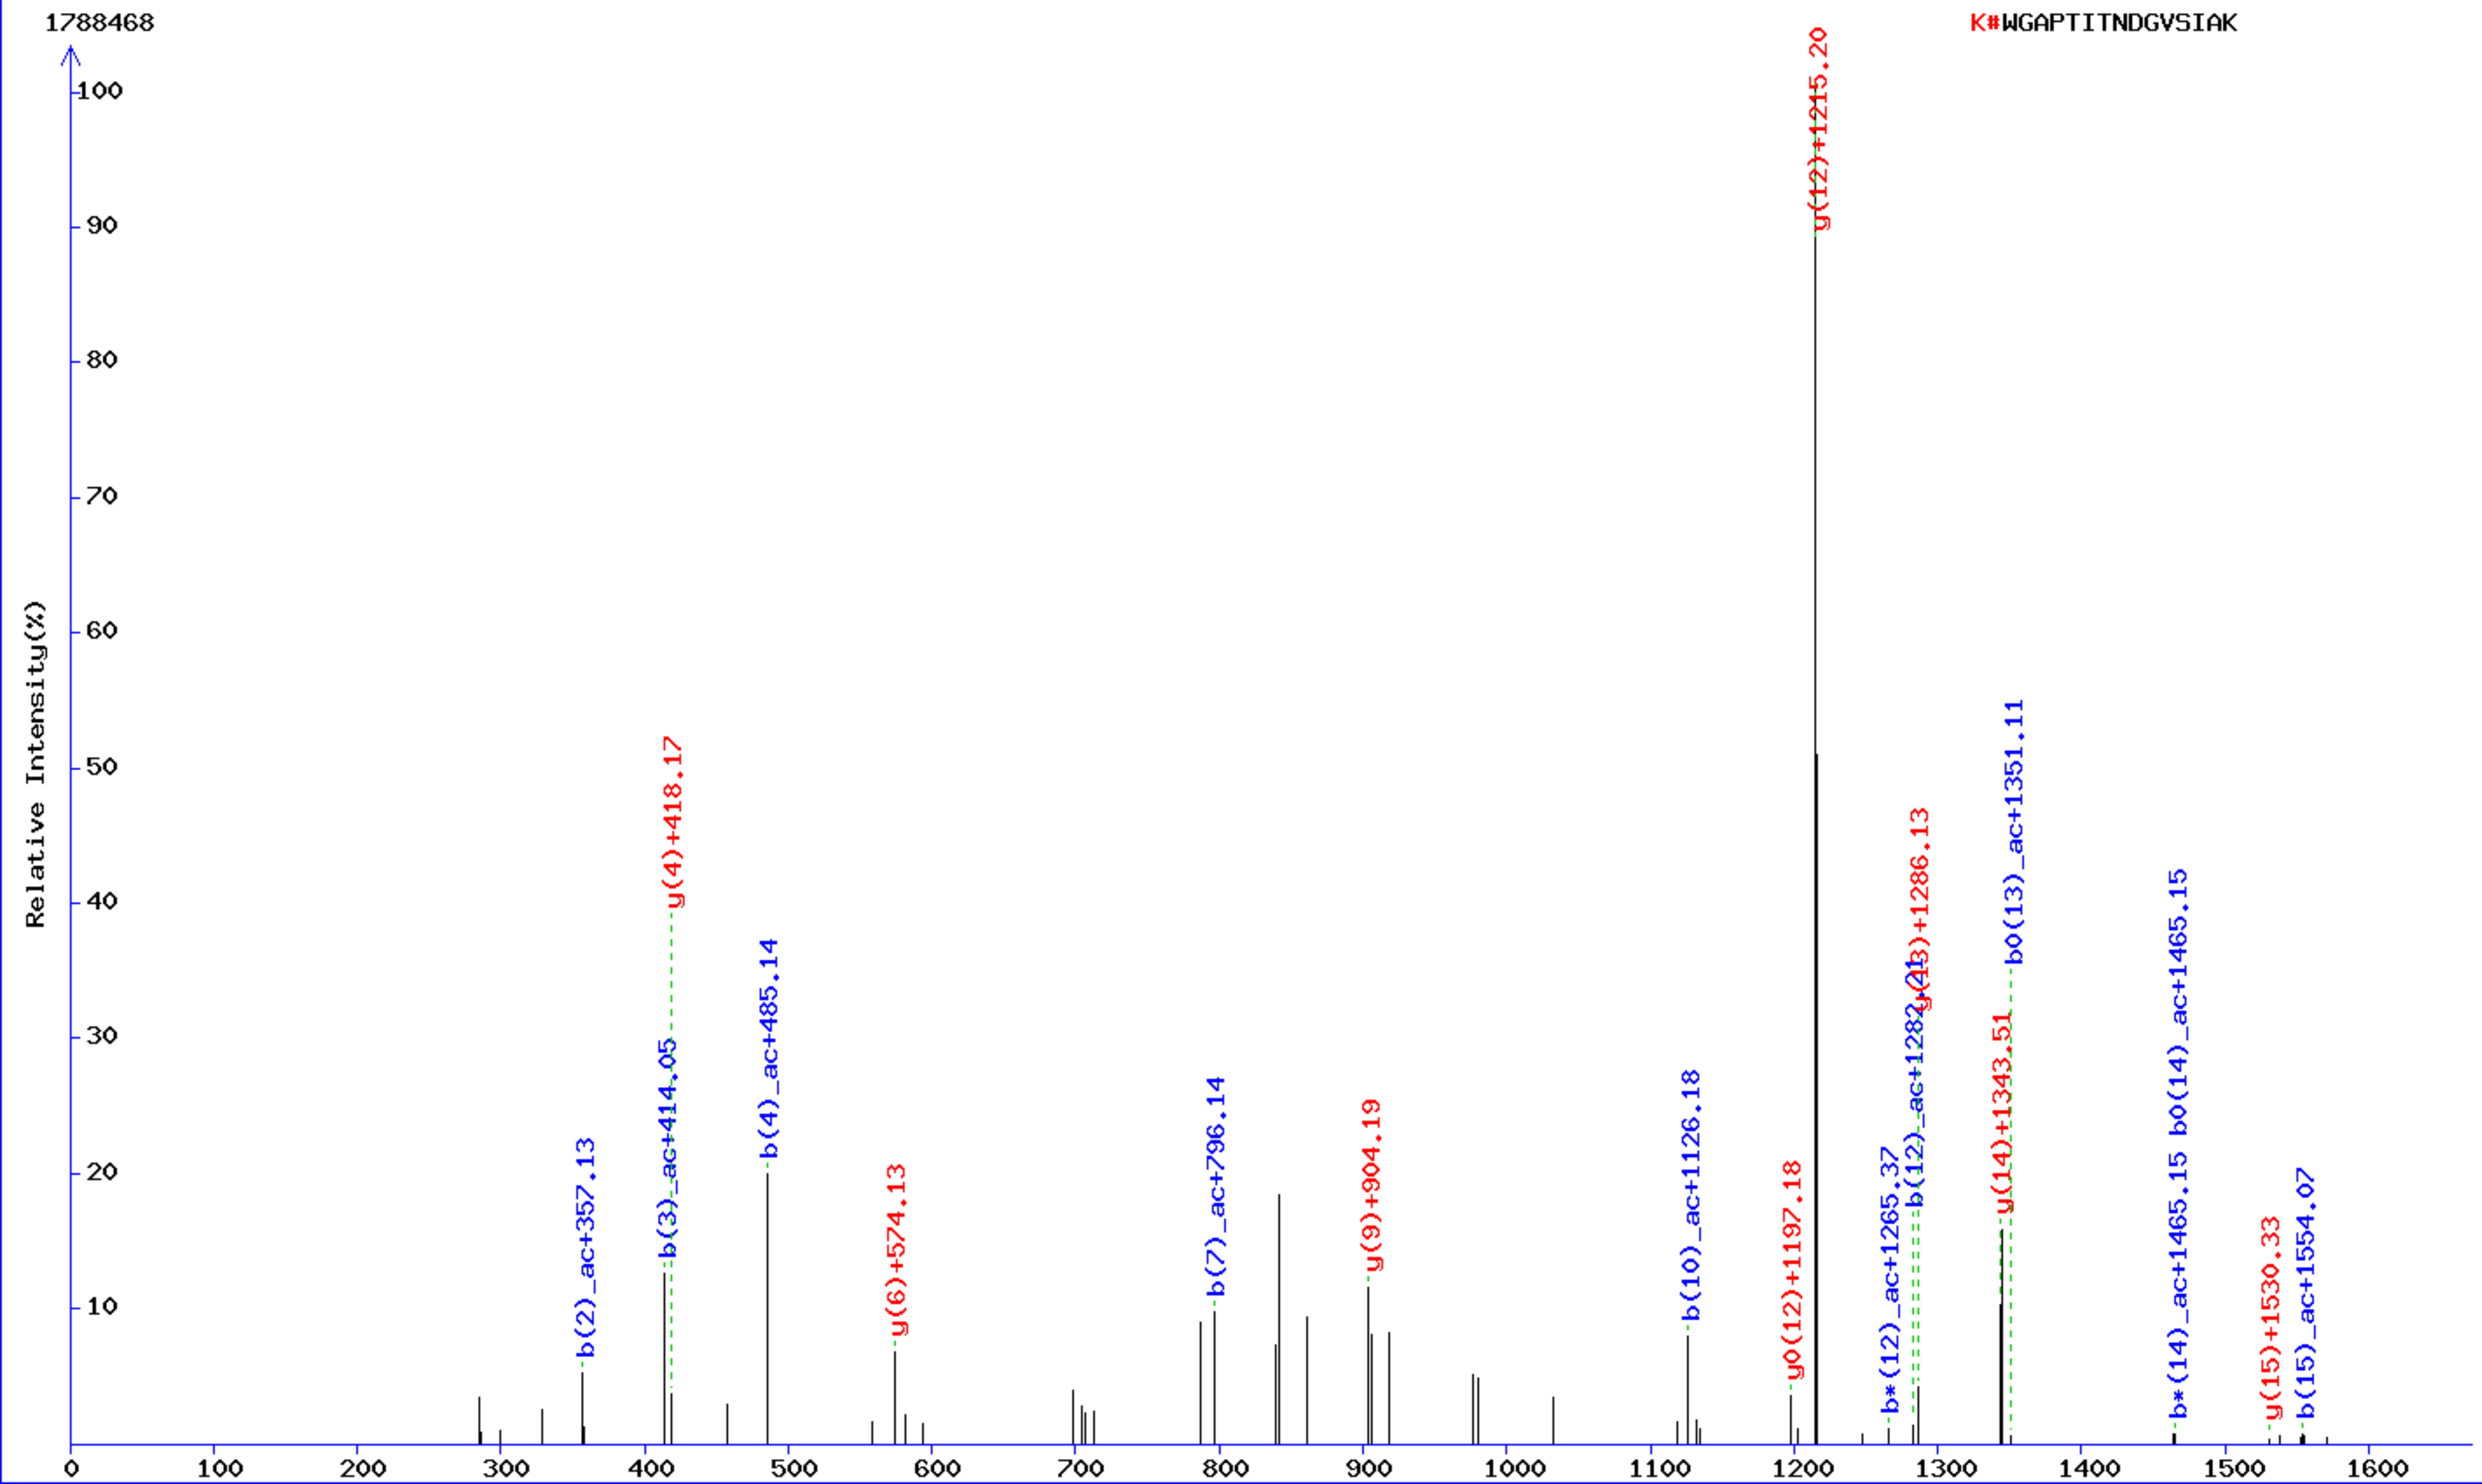

# gi|148661317/gi|148661325 MRA\_1541/MRA\_1533 acyl-CoA synthetase

LVAVIELK#K

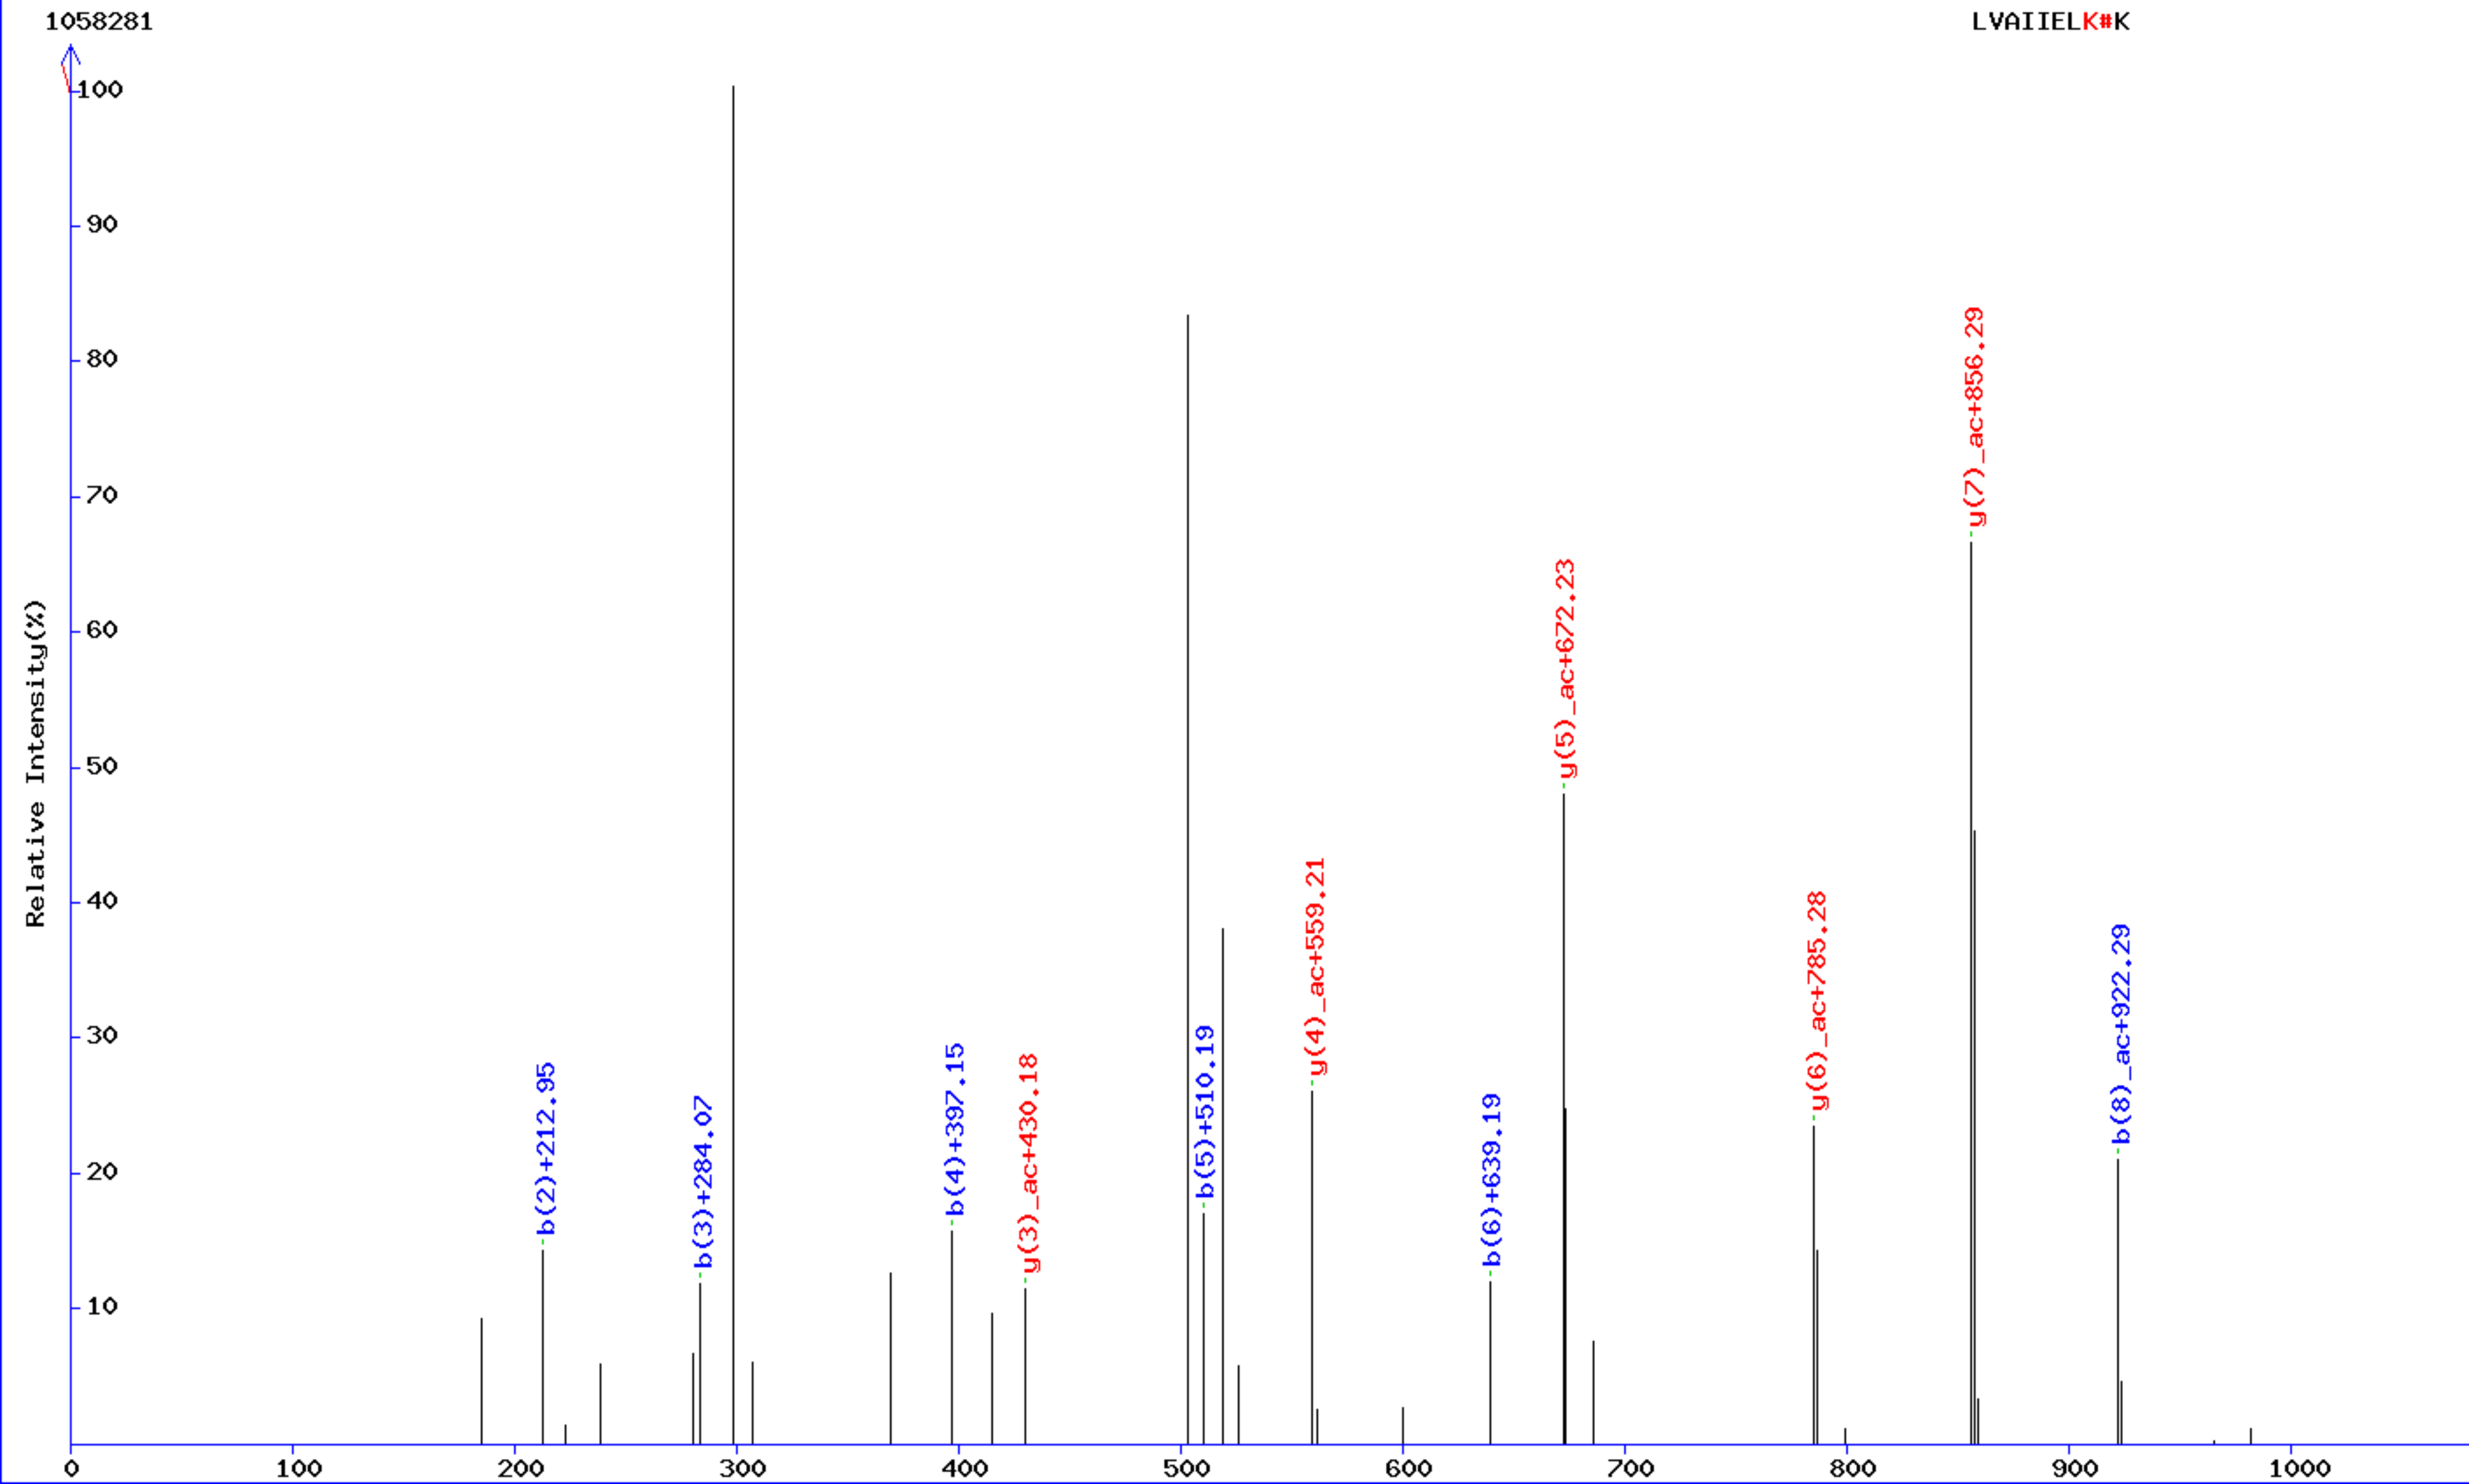

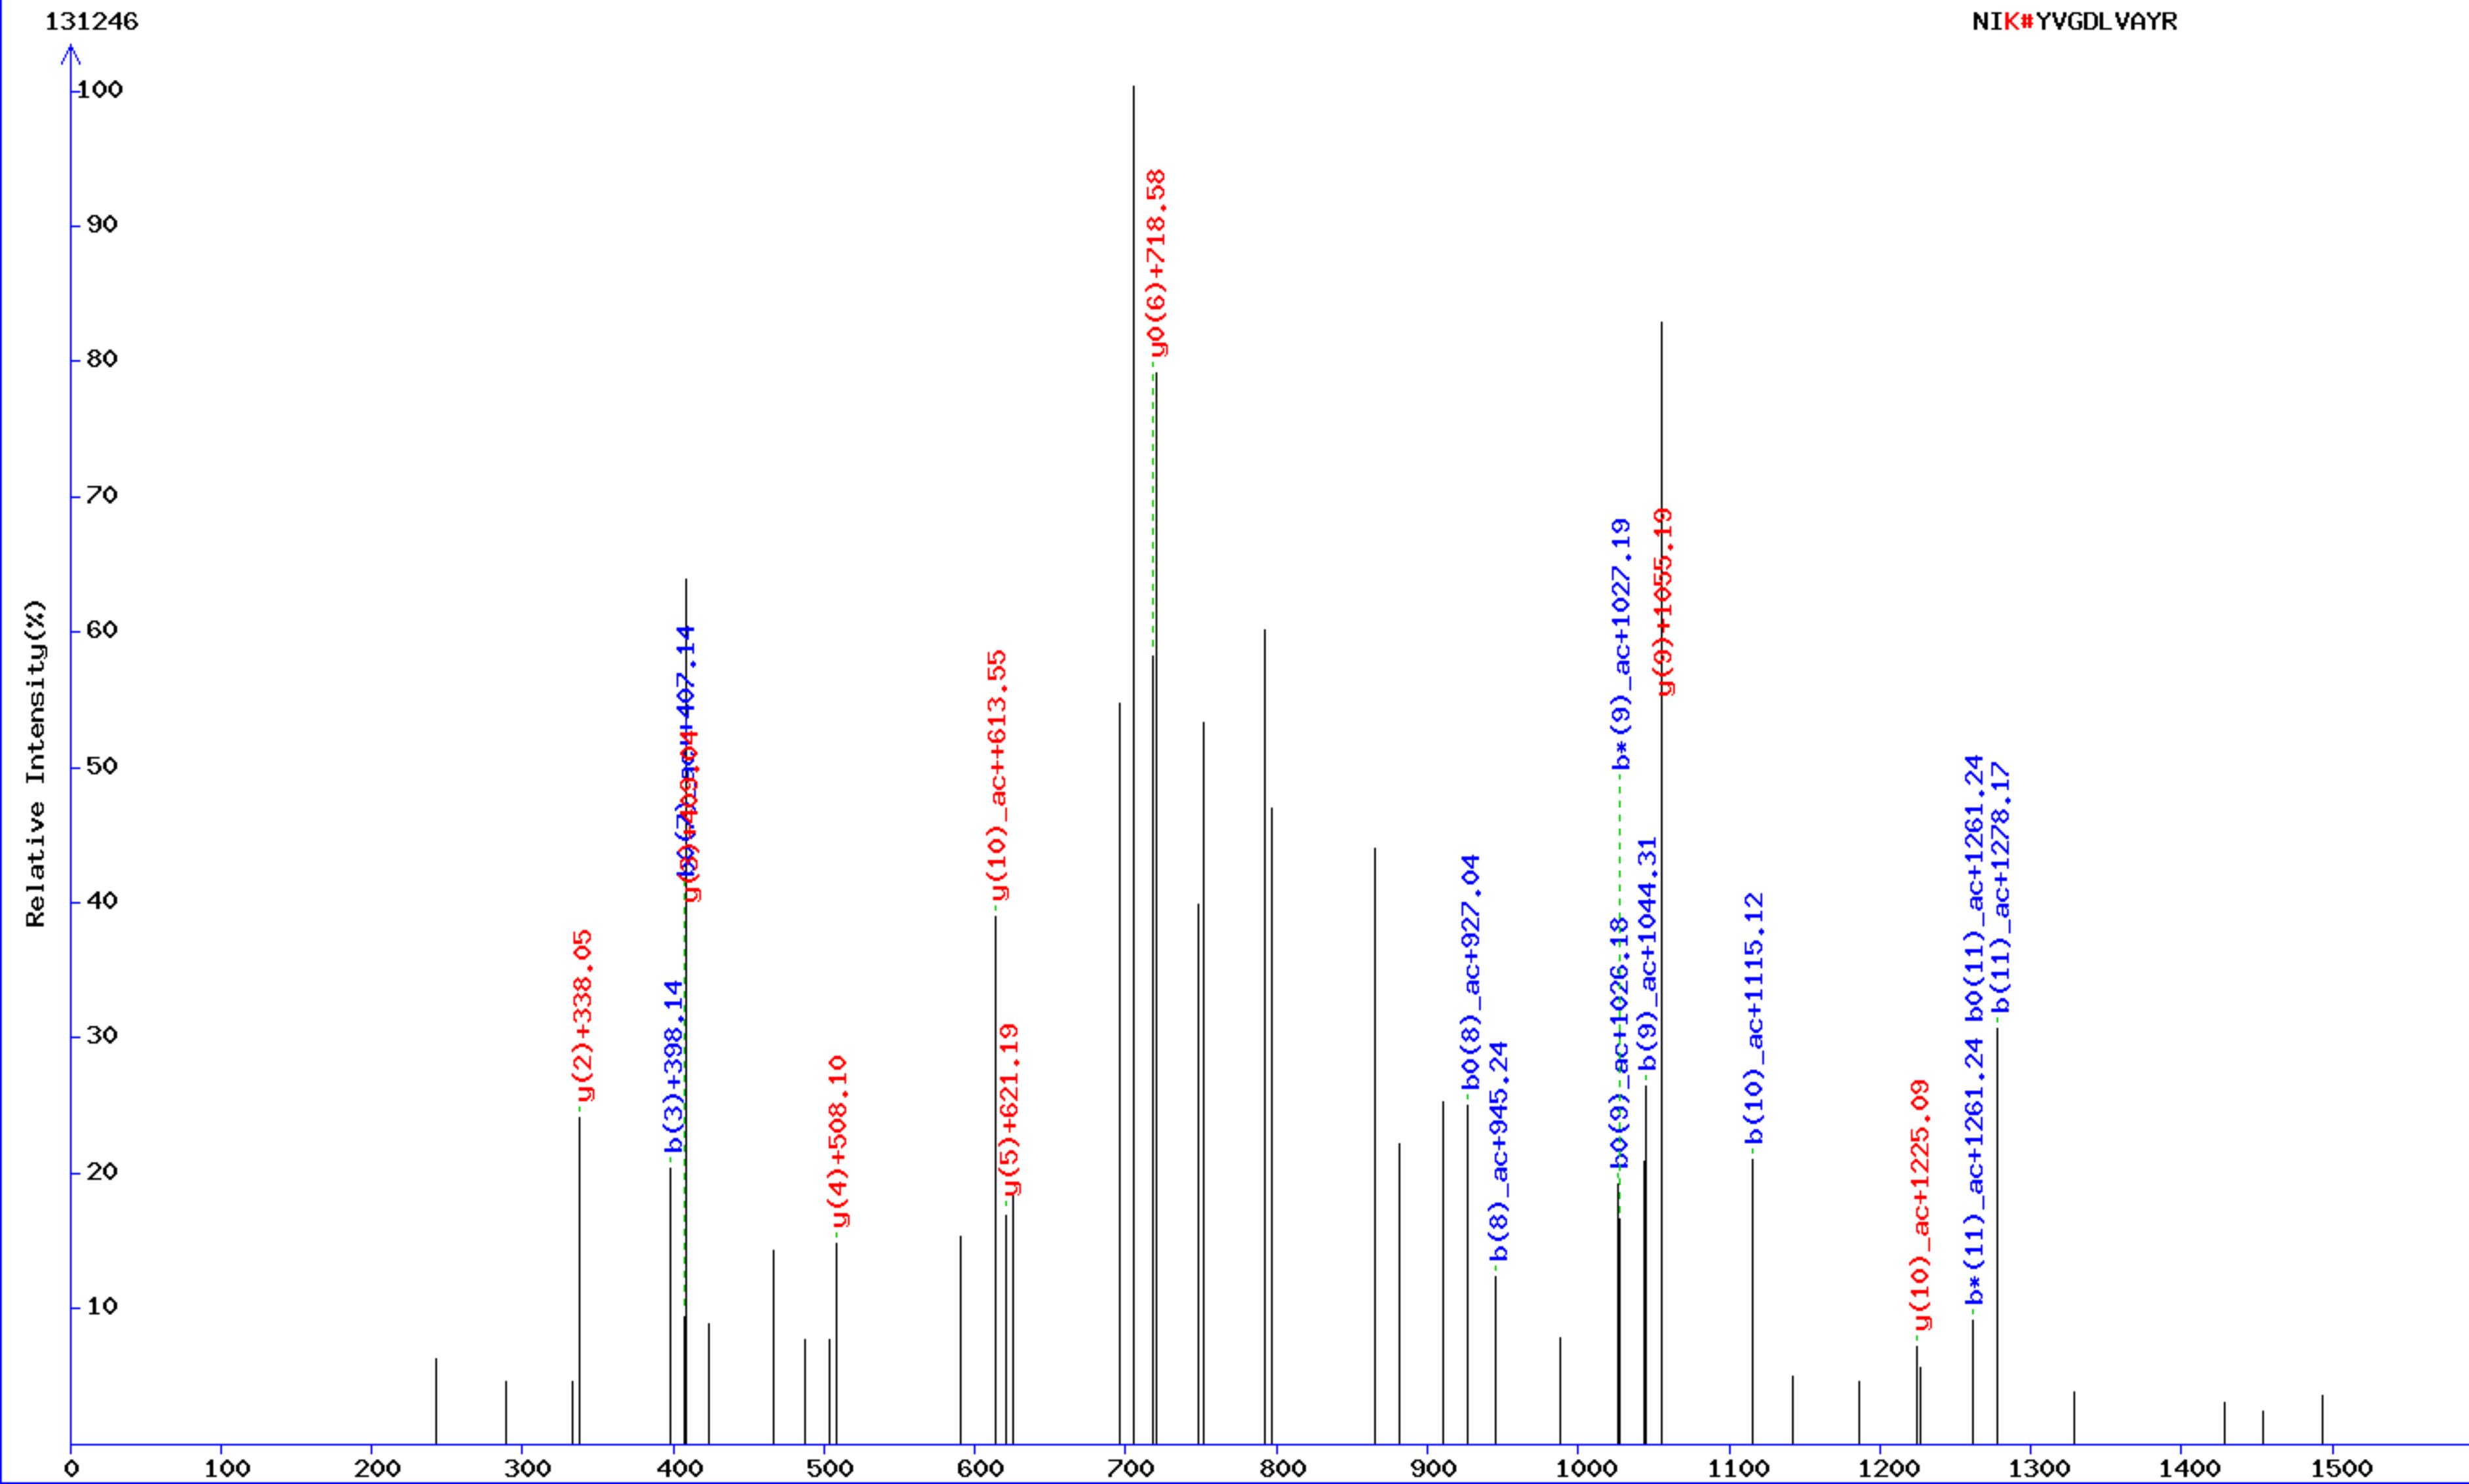

gi|148660205 MRA\_0445 molecular chaperone GroEL

QIAFNSGLEPGVVAEK#VR

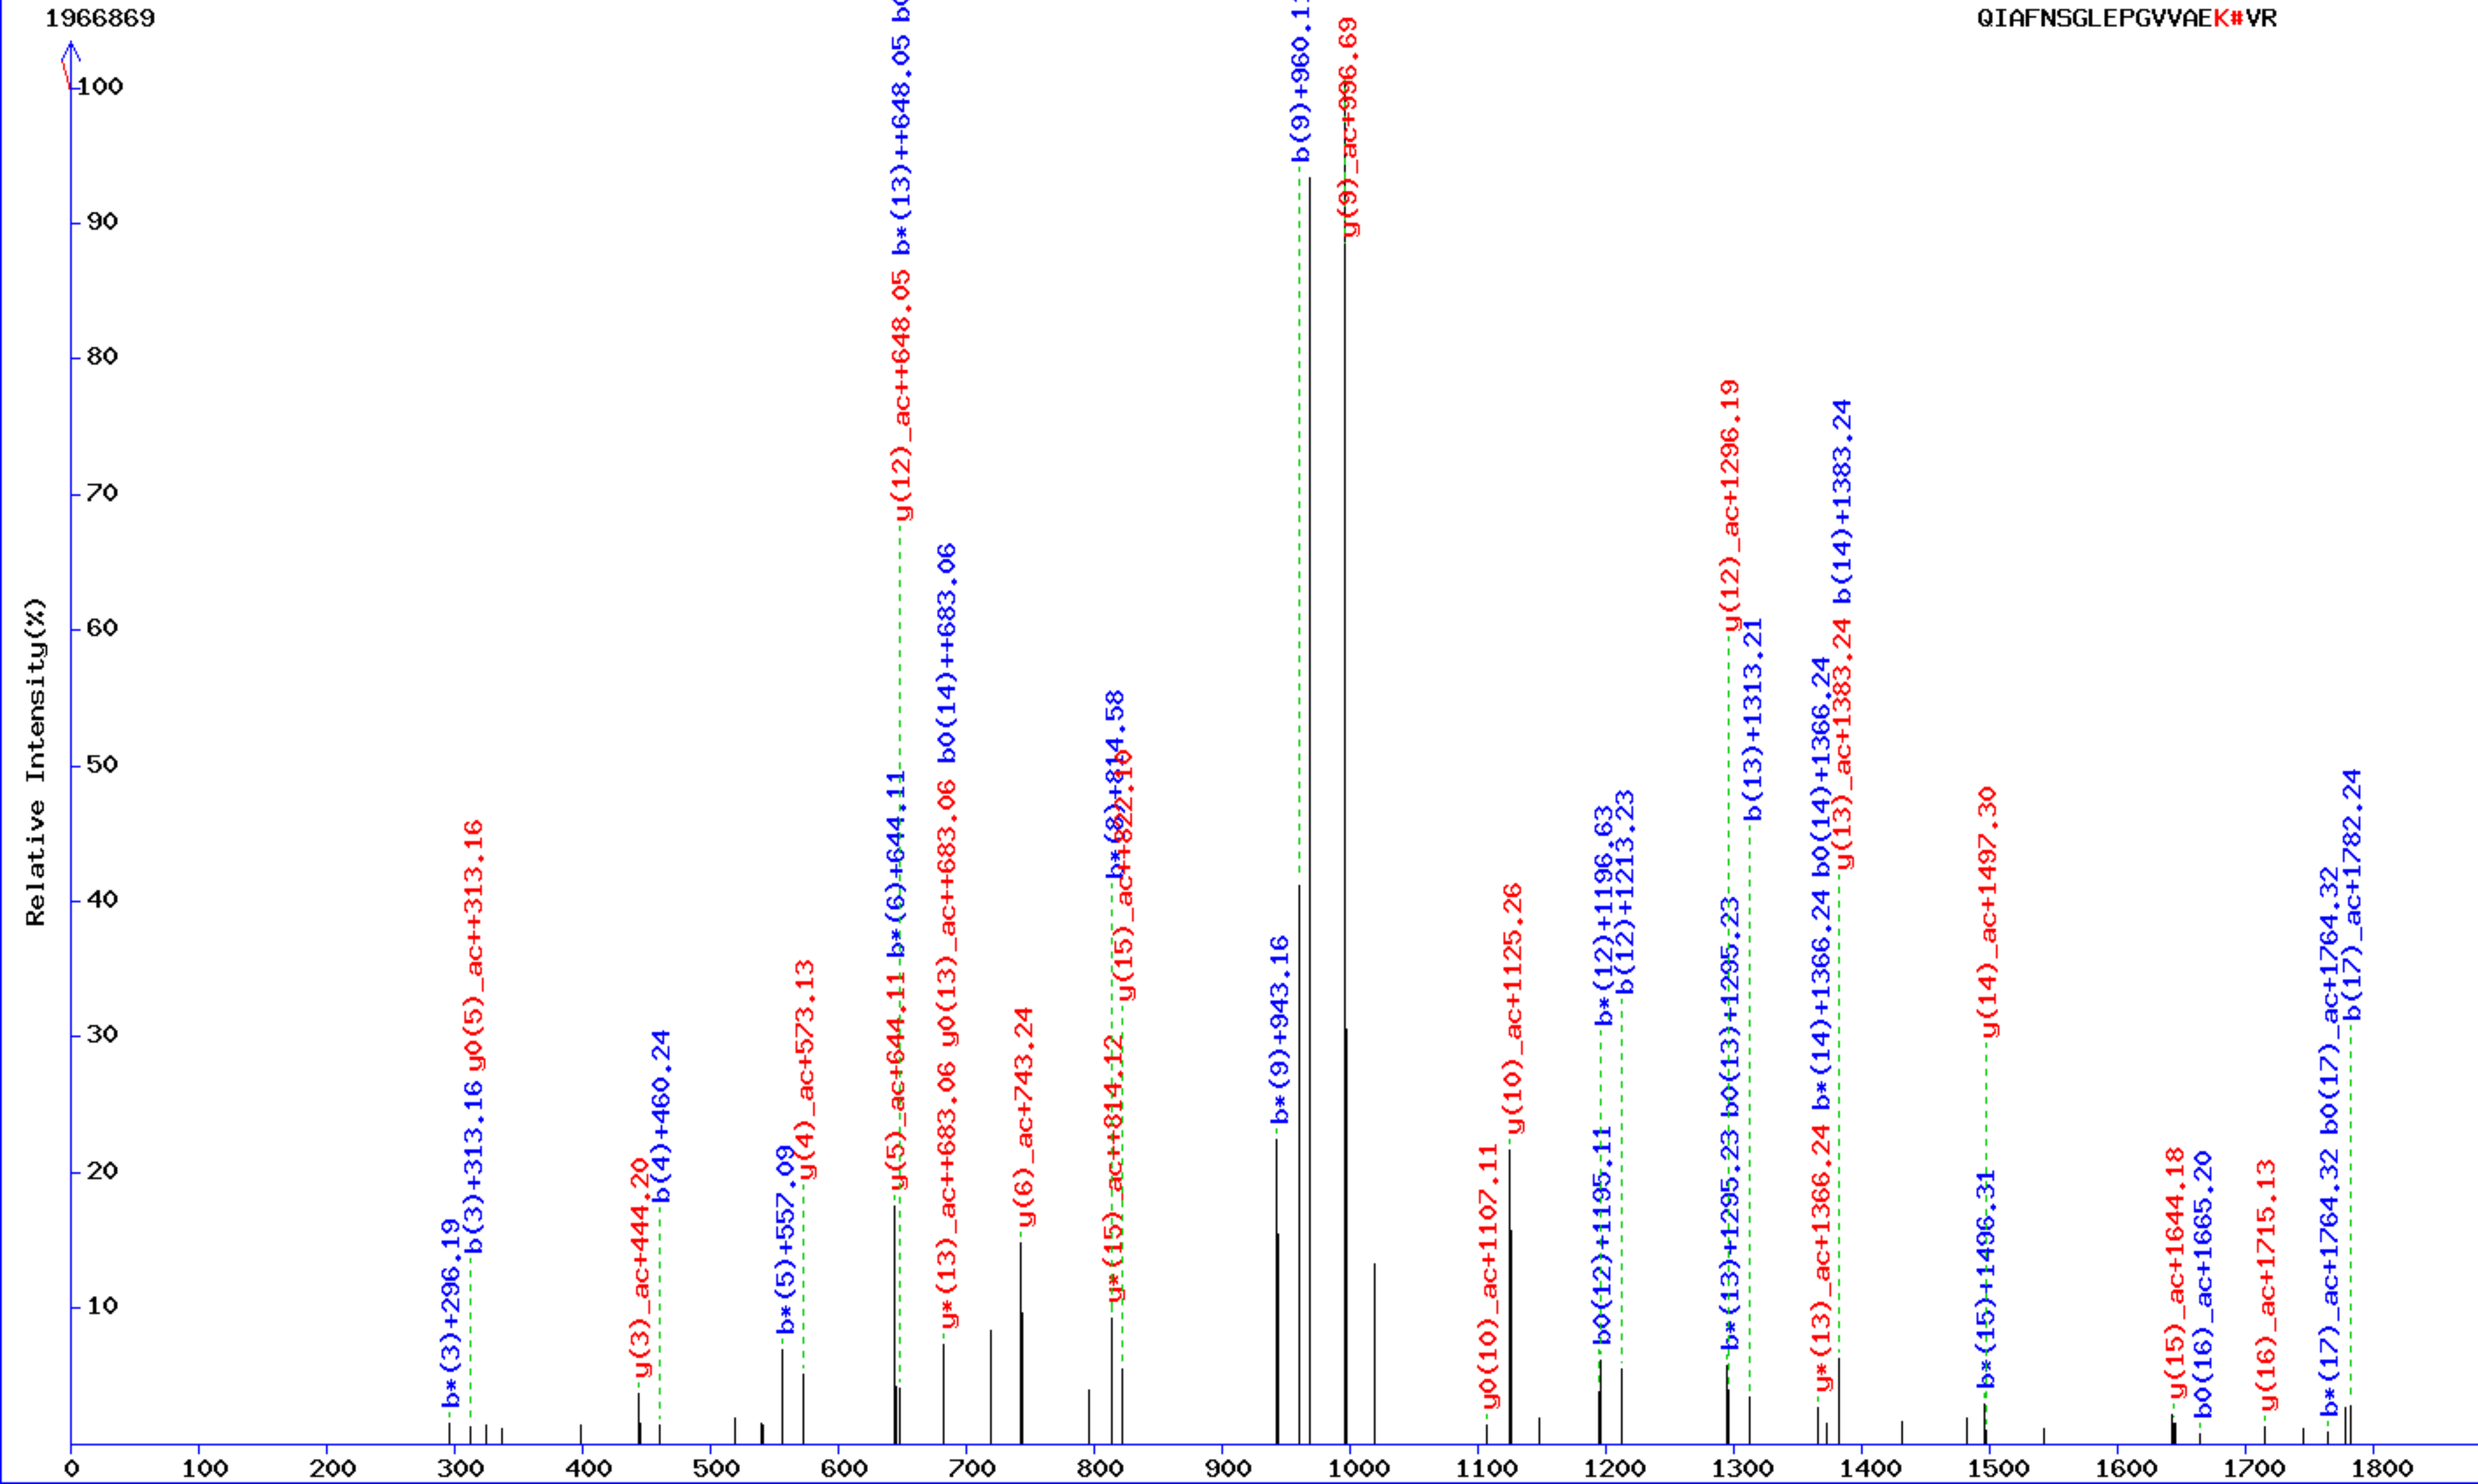

# gi|148660674 MRA\_0904 type II citrate synthase

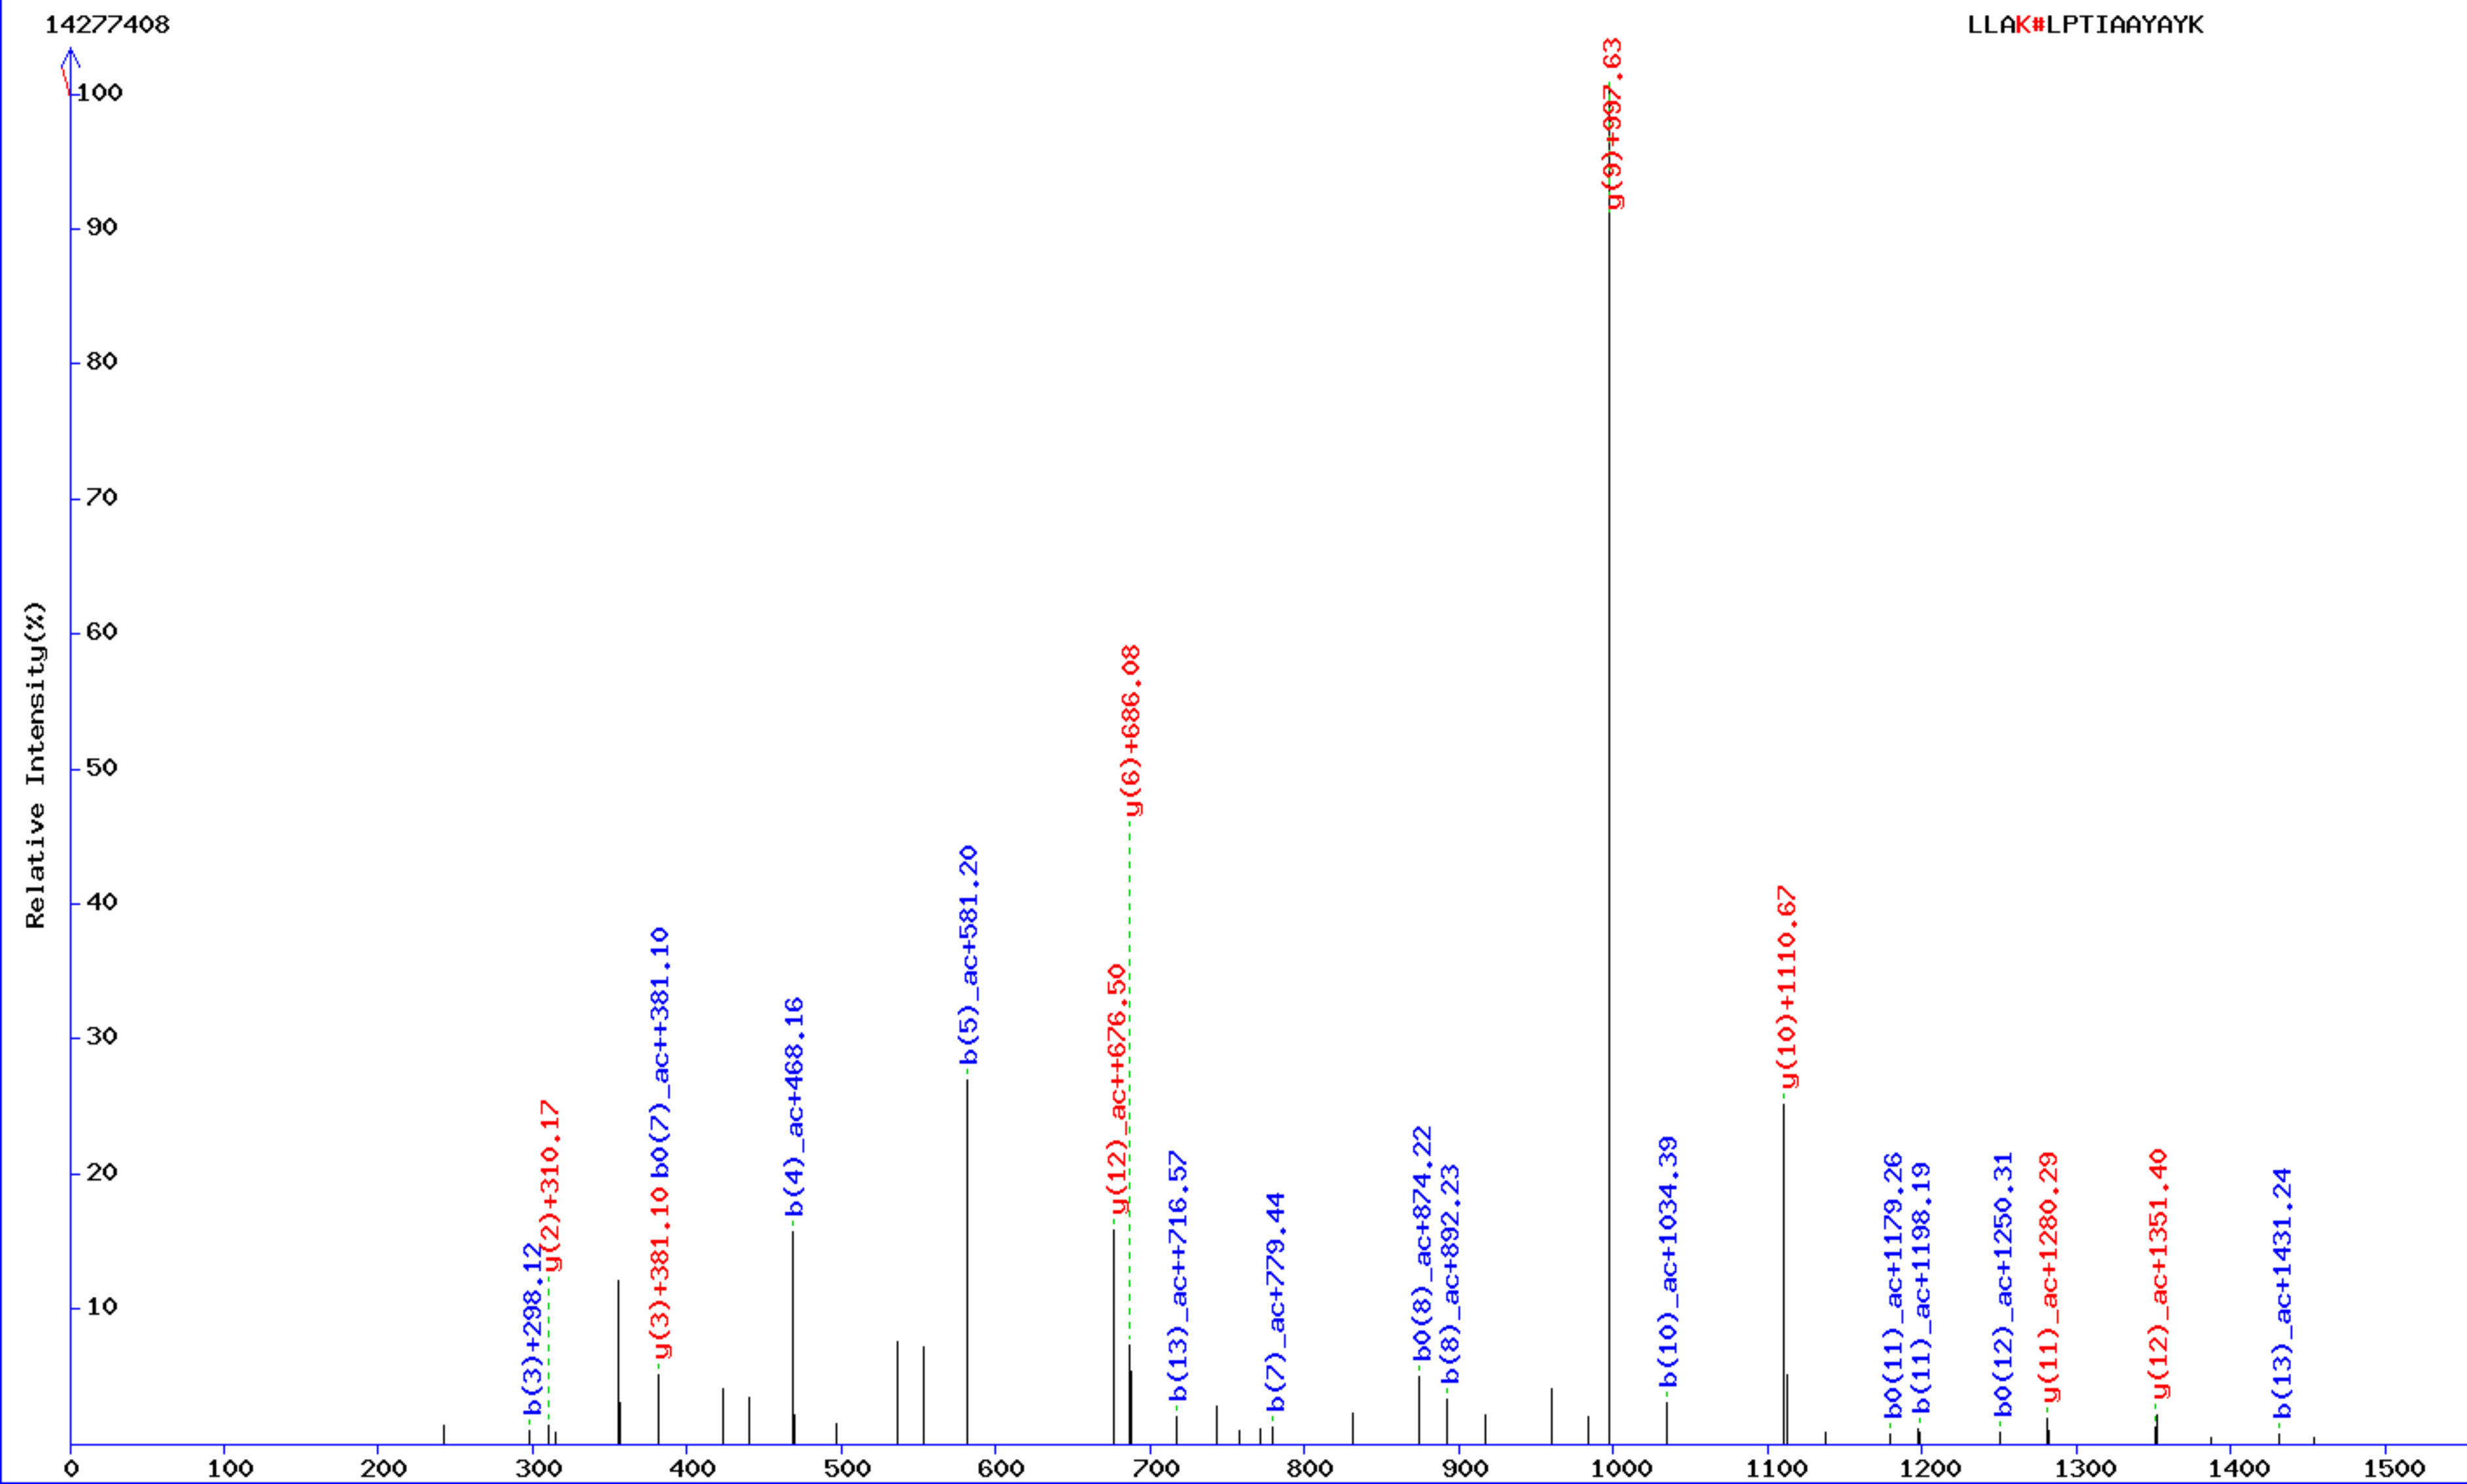

# gi|148661425 MRA\_1640 30S ribosomal protein S1

VTK#LVPFGAFVR

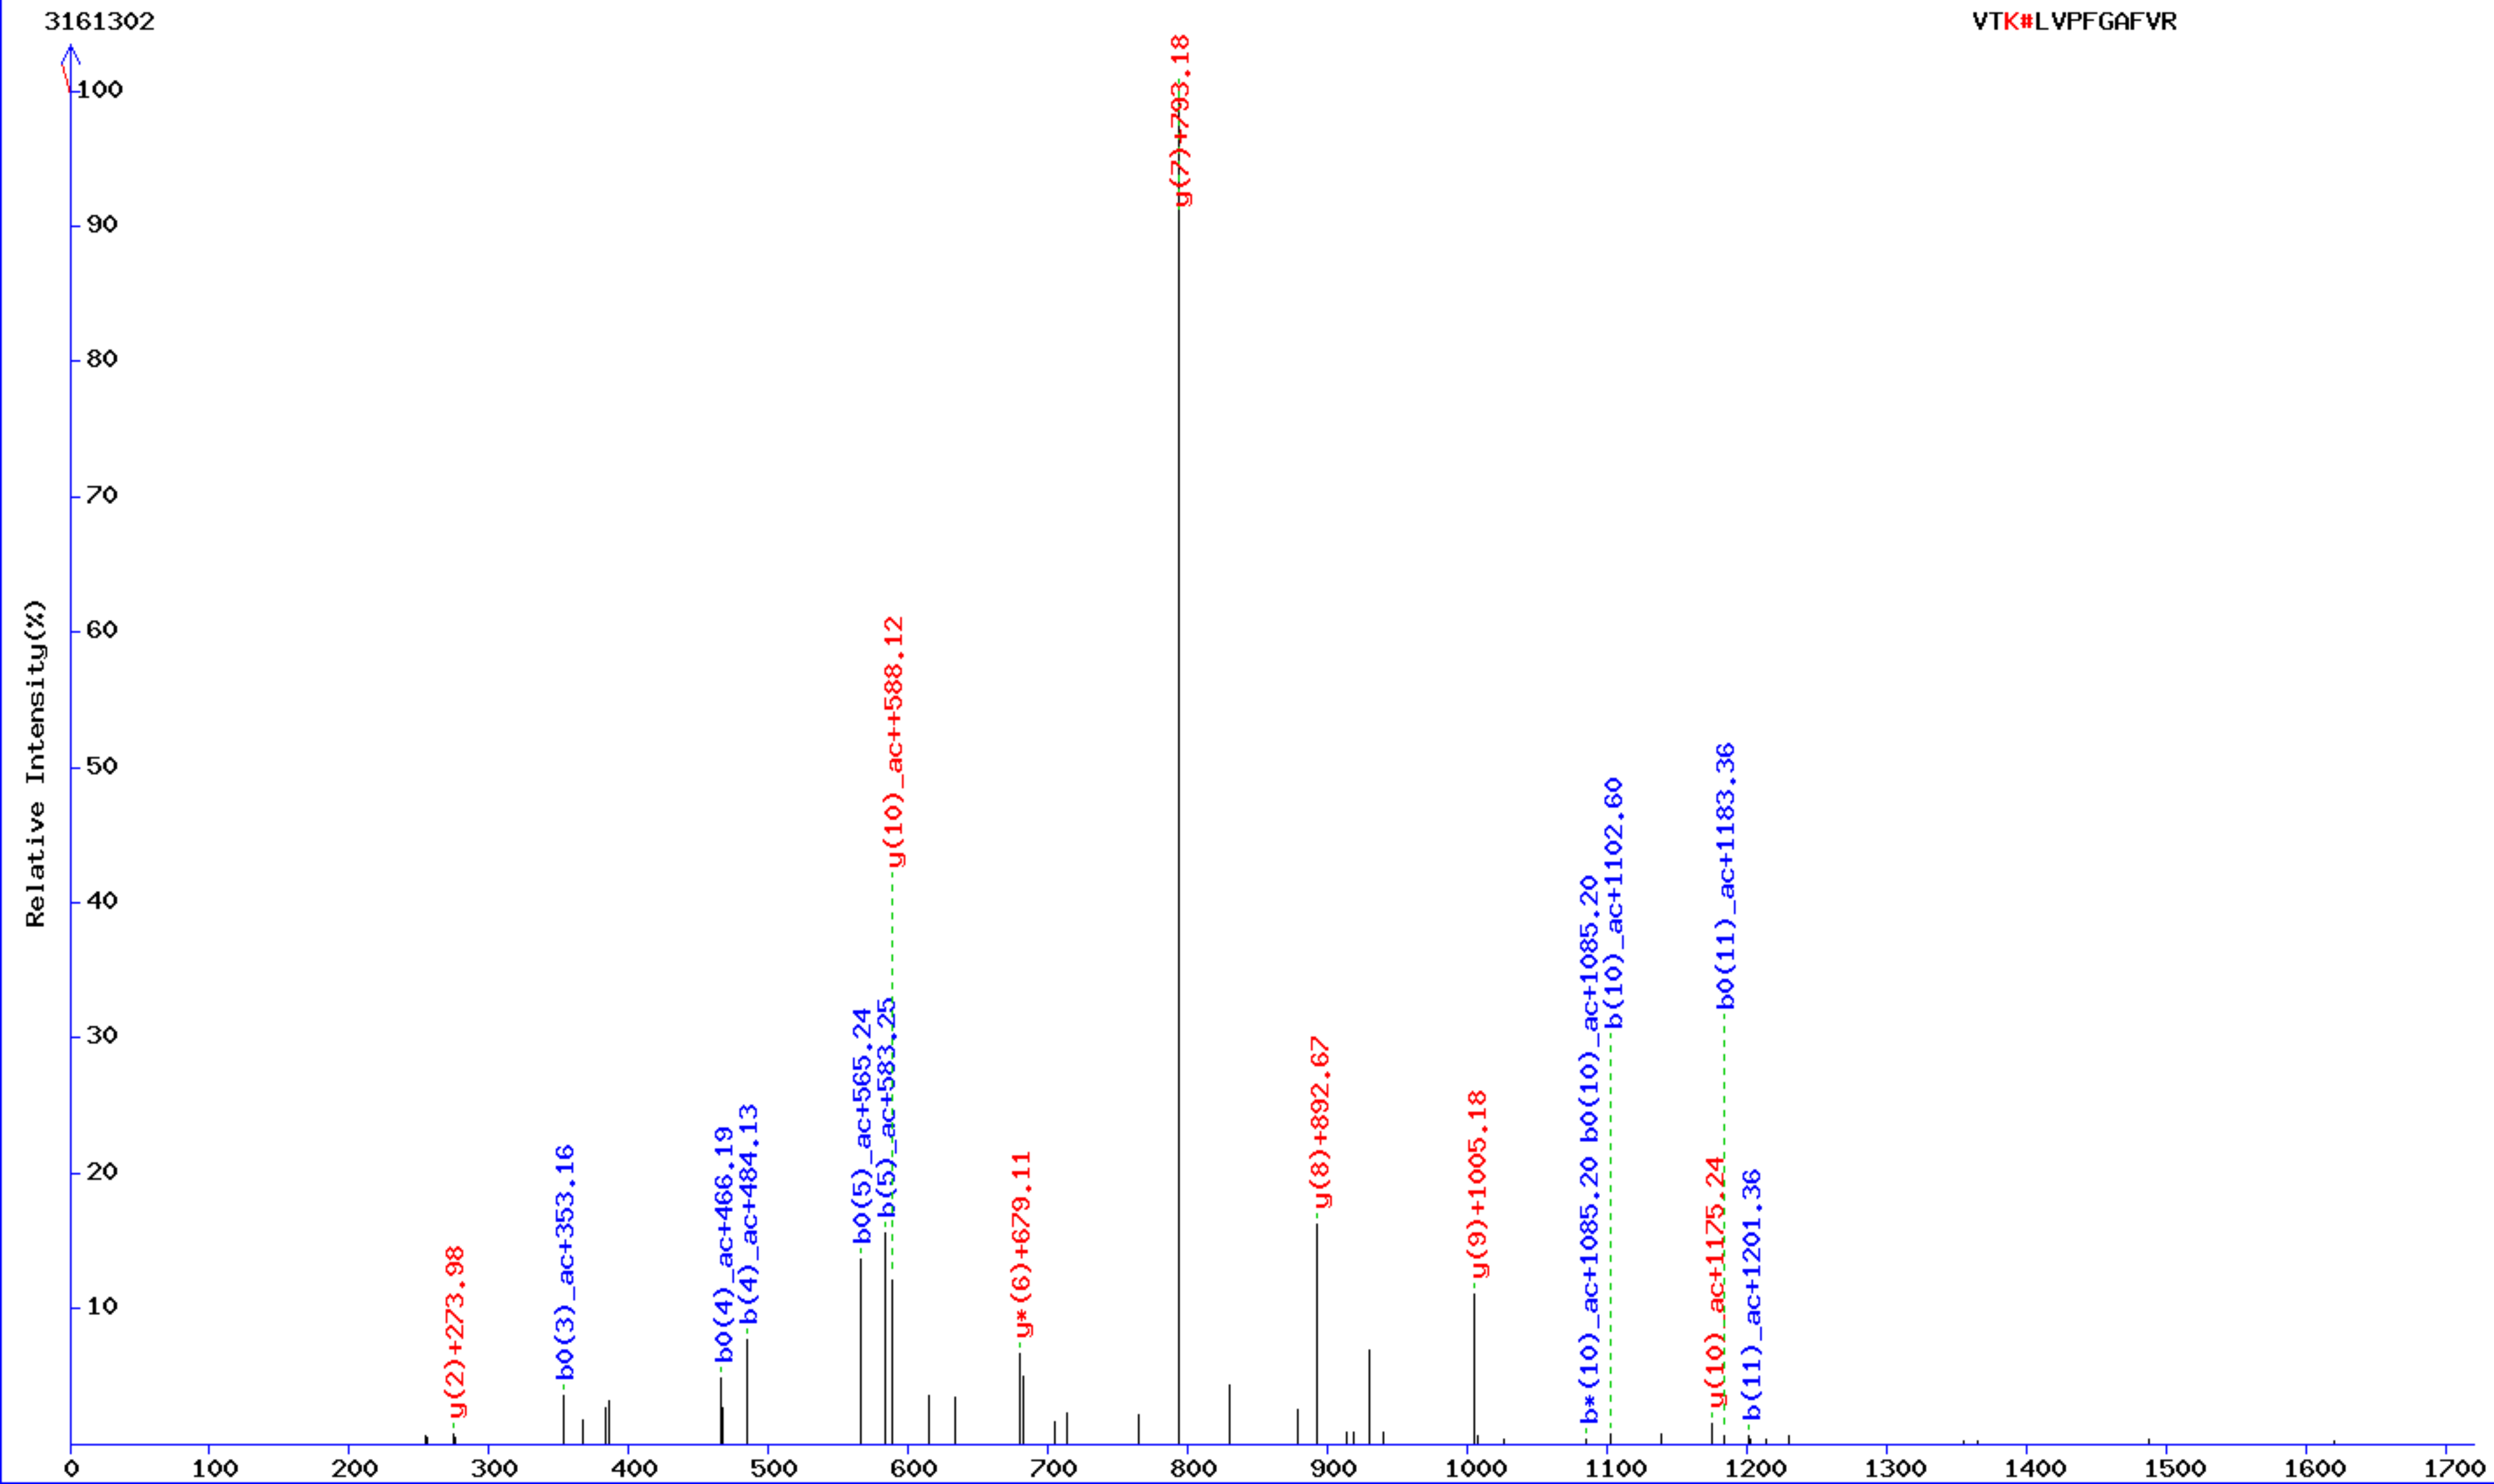



# gi|148660116 MRA\_0359 molecular chaperone DnaK

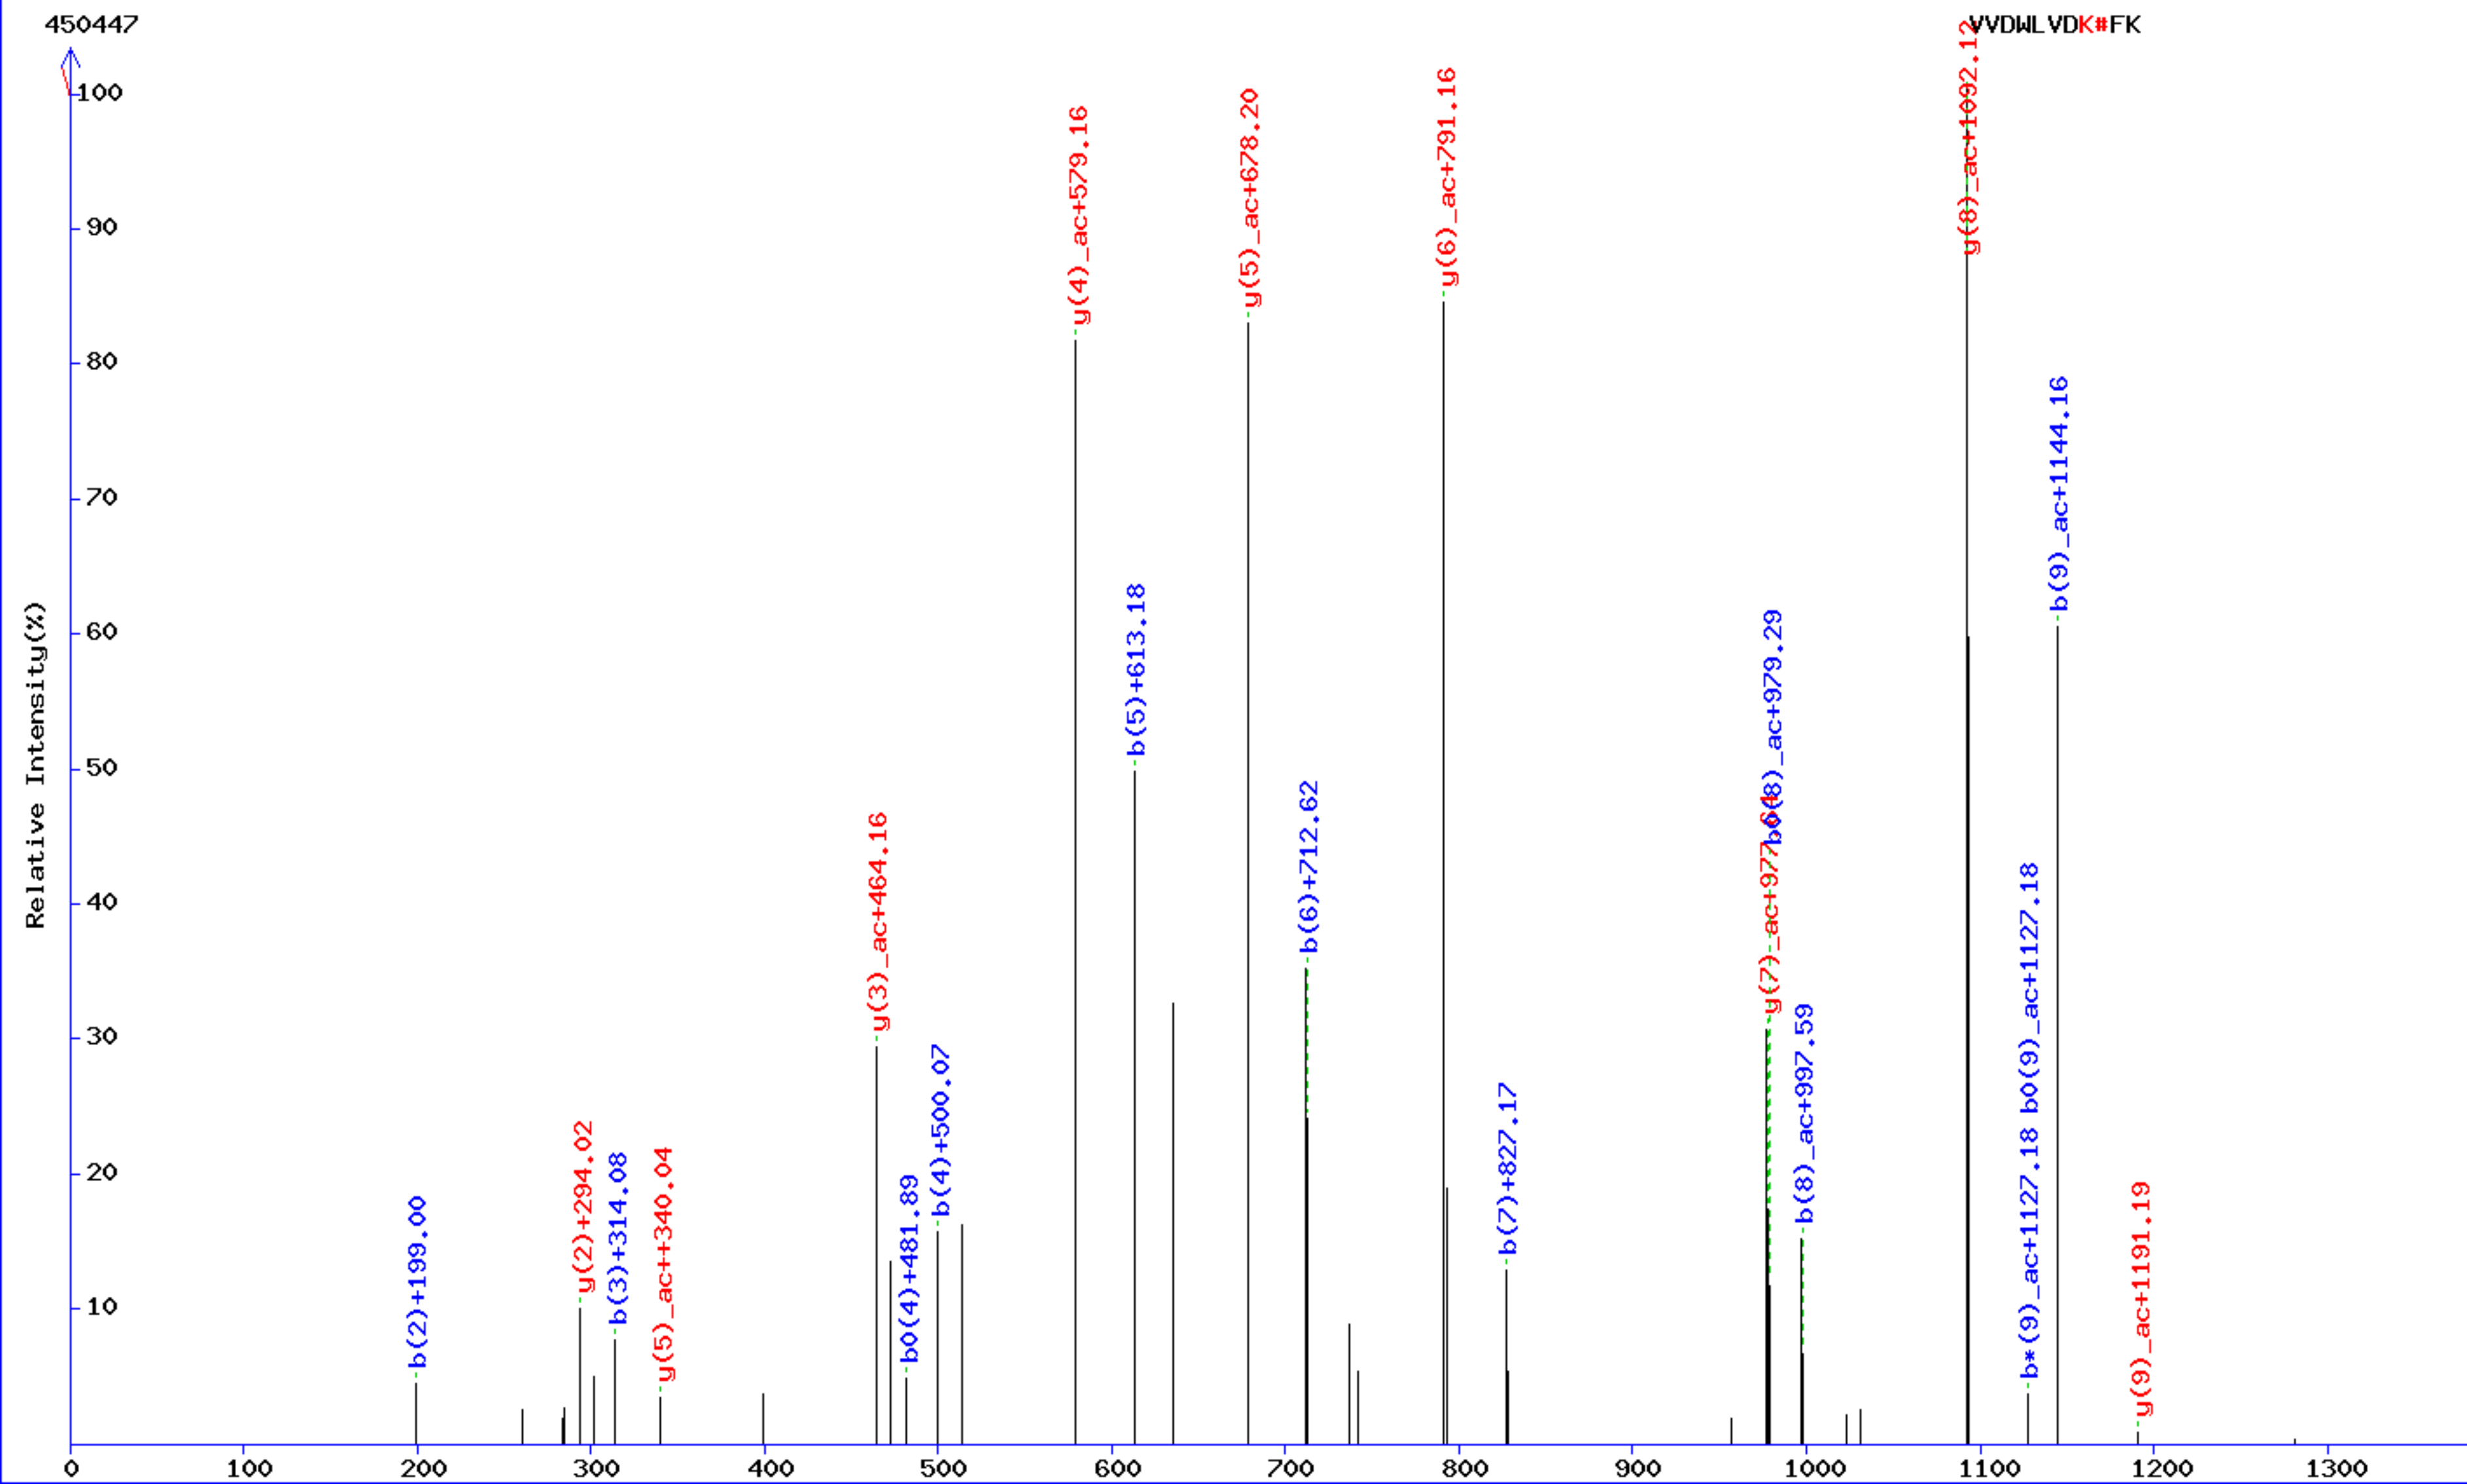

# gi|148660205 MRA\_0445 molecular chaperone GroEL

AGAATEVELK#ER

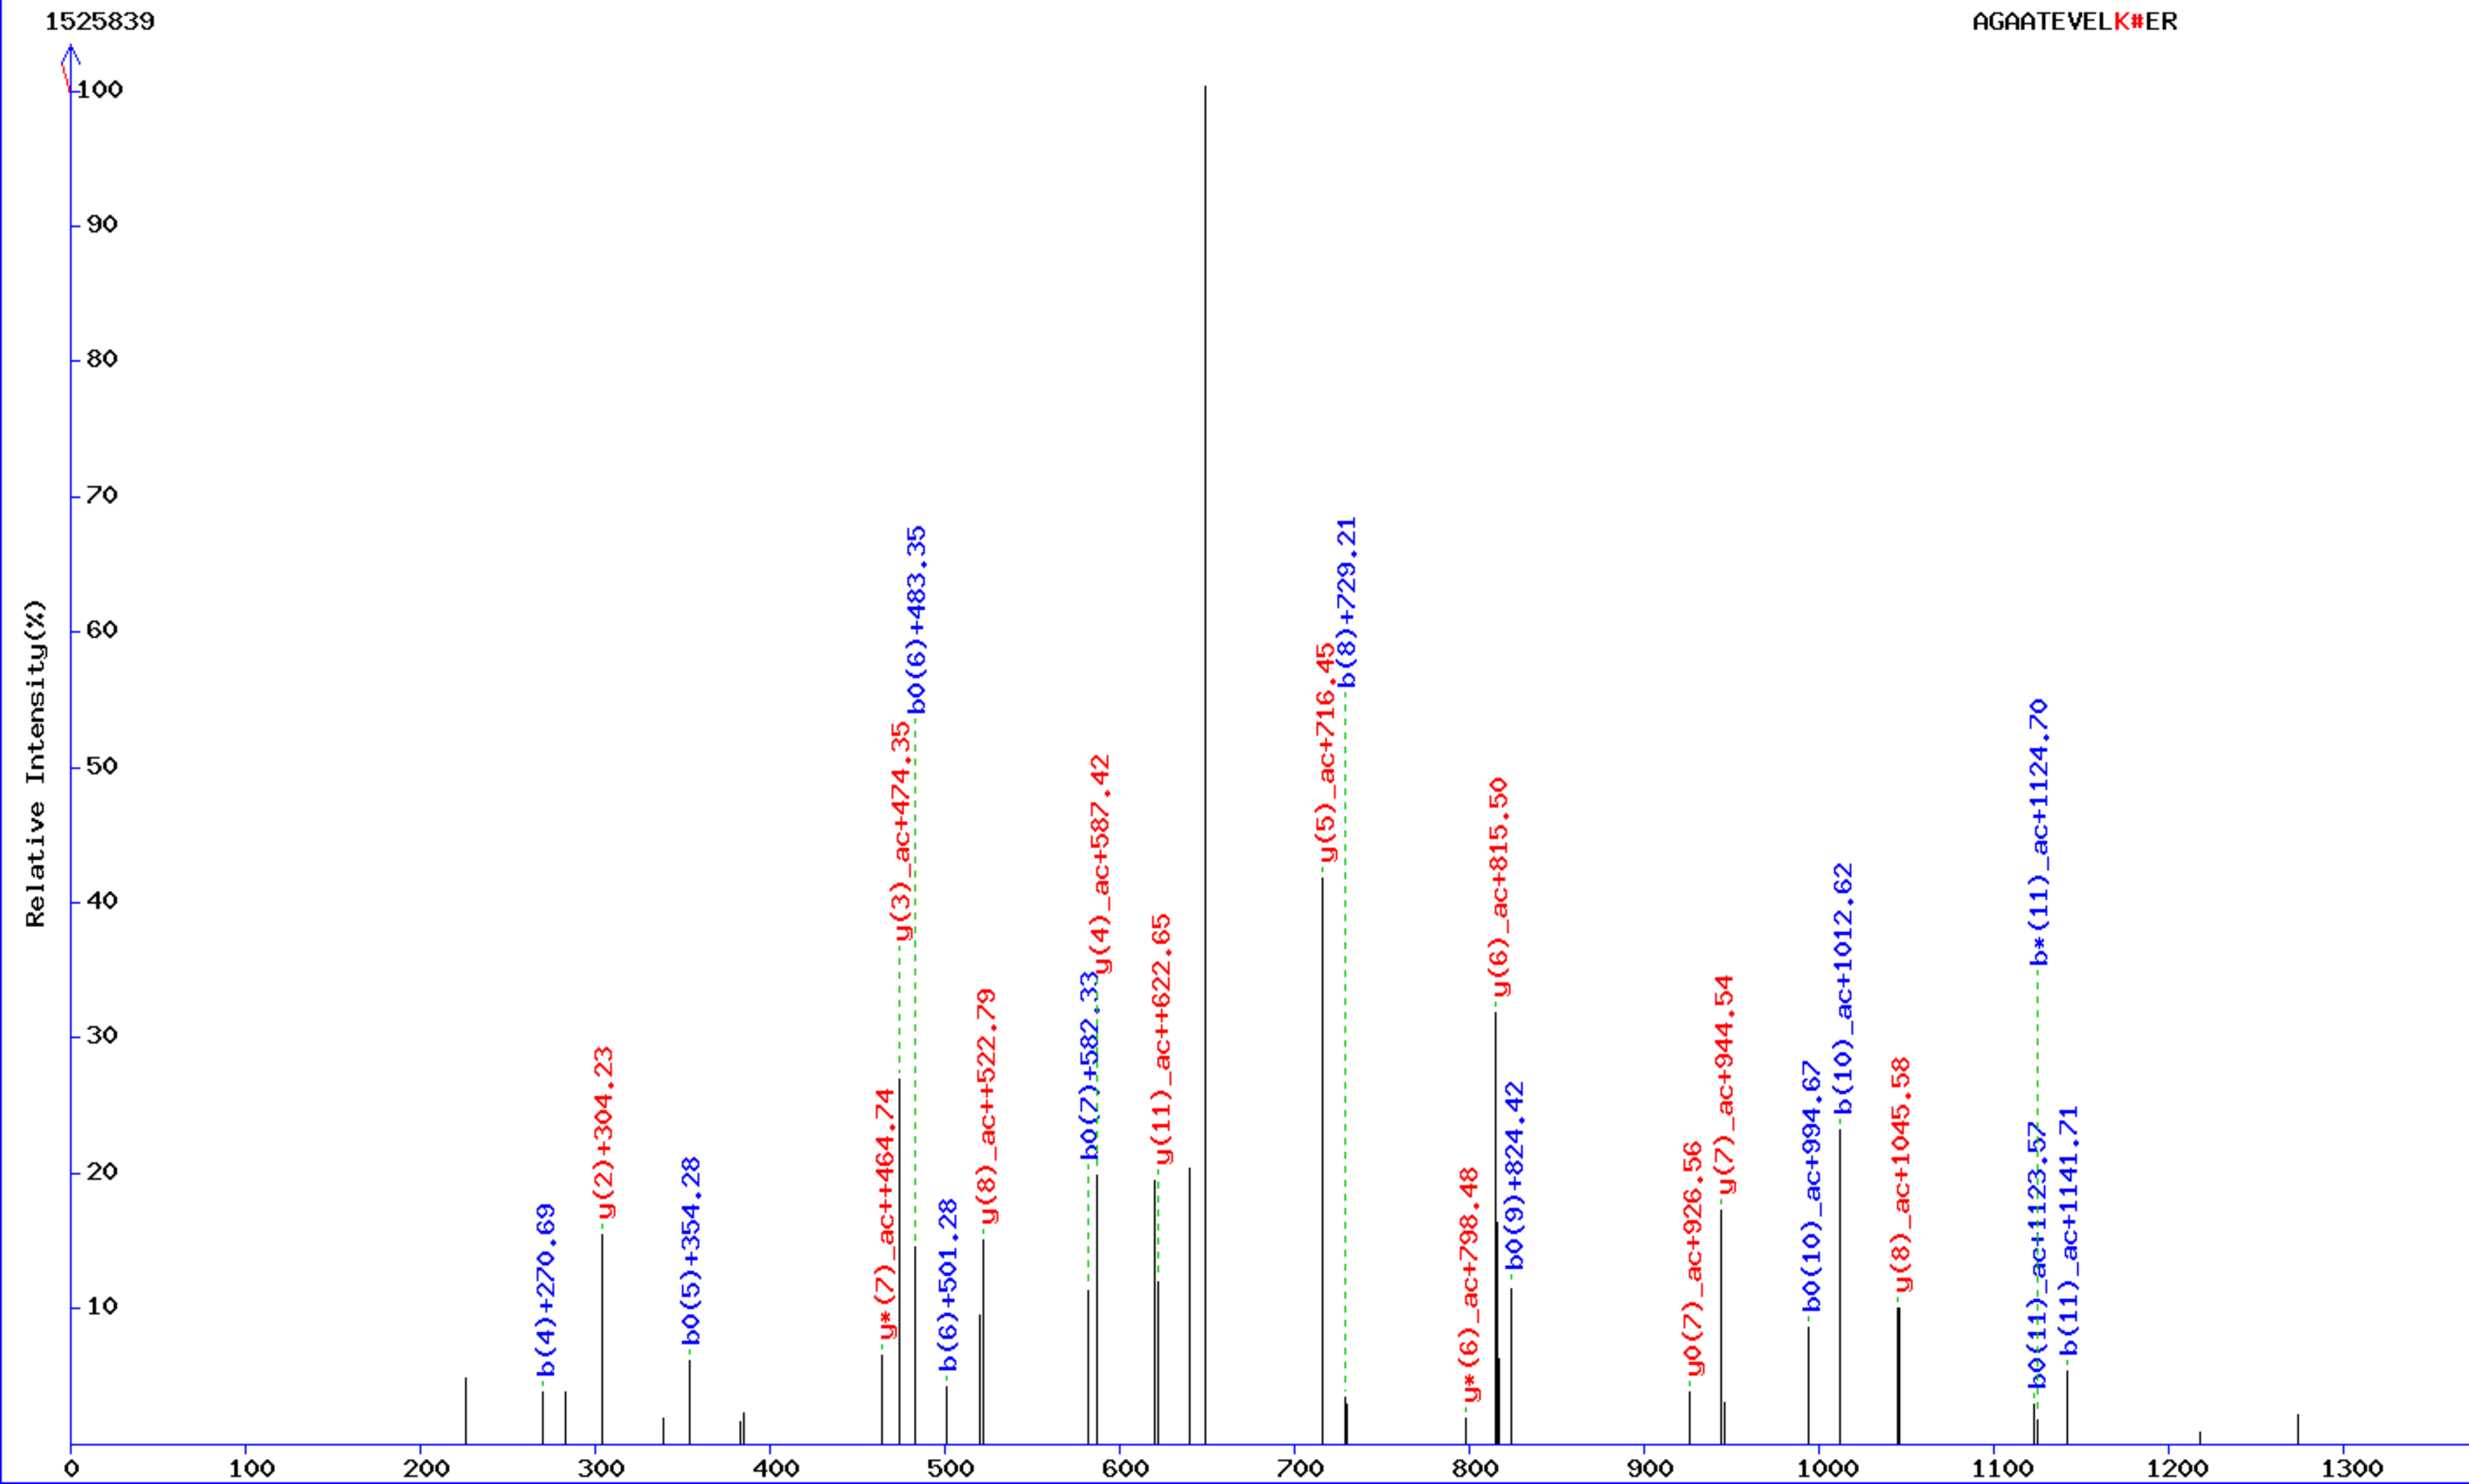

# gi|148660884 MRA\_1109 fumarate hydratase

VPAK#ALWR

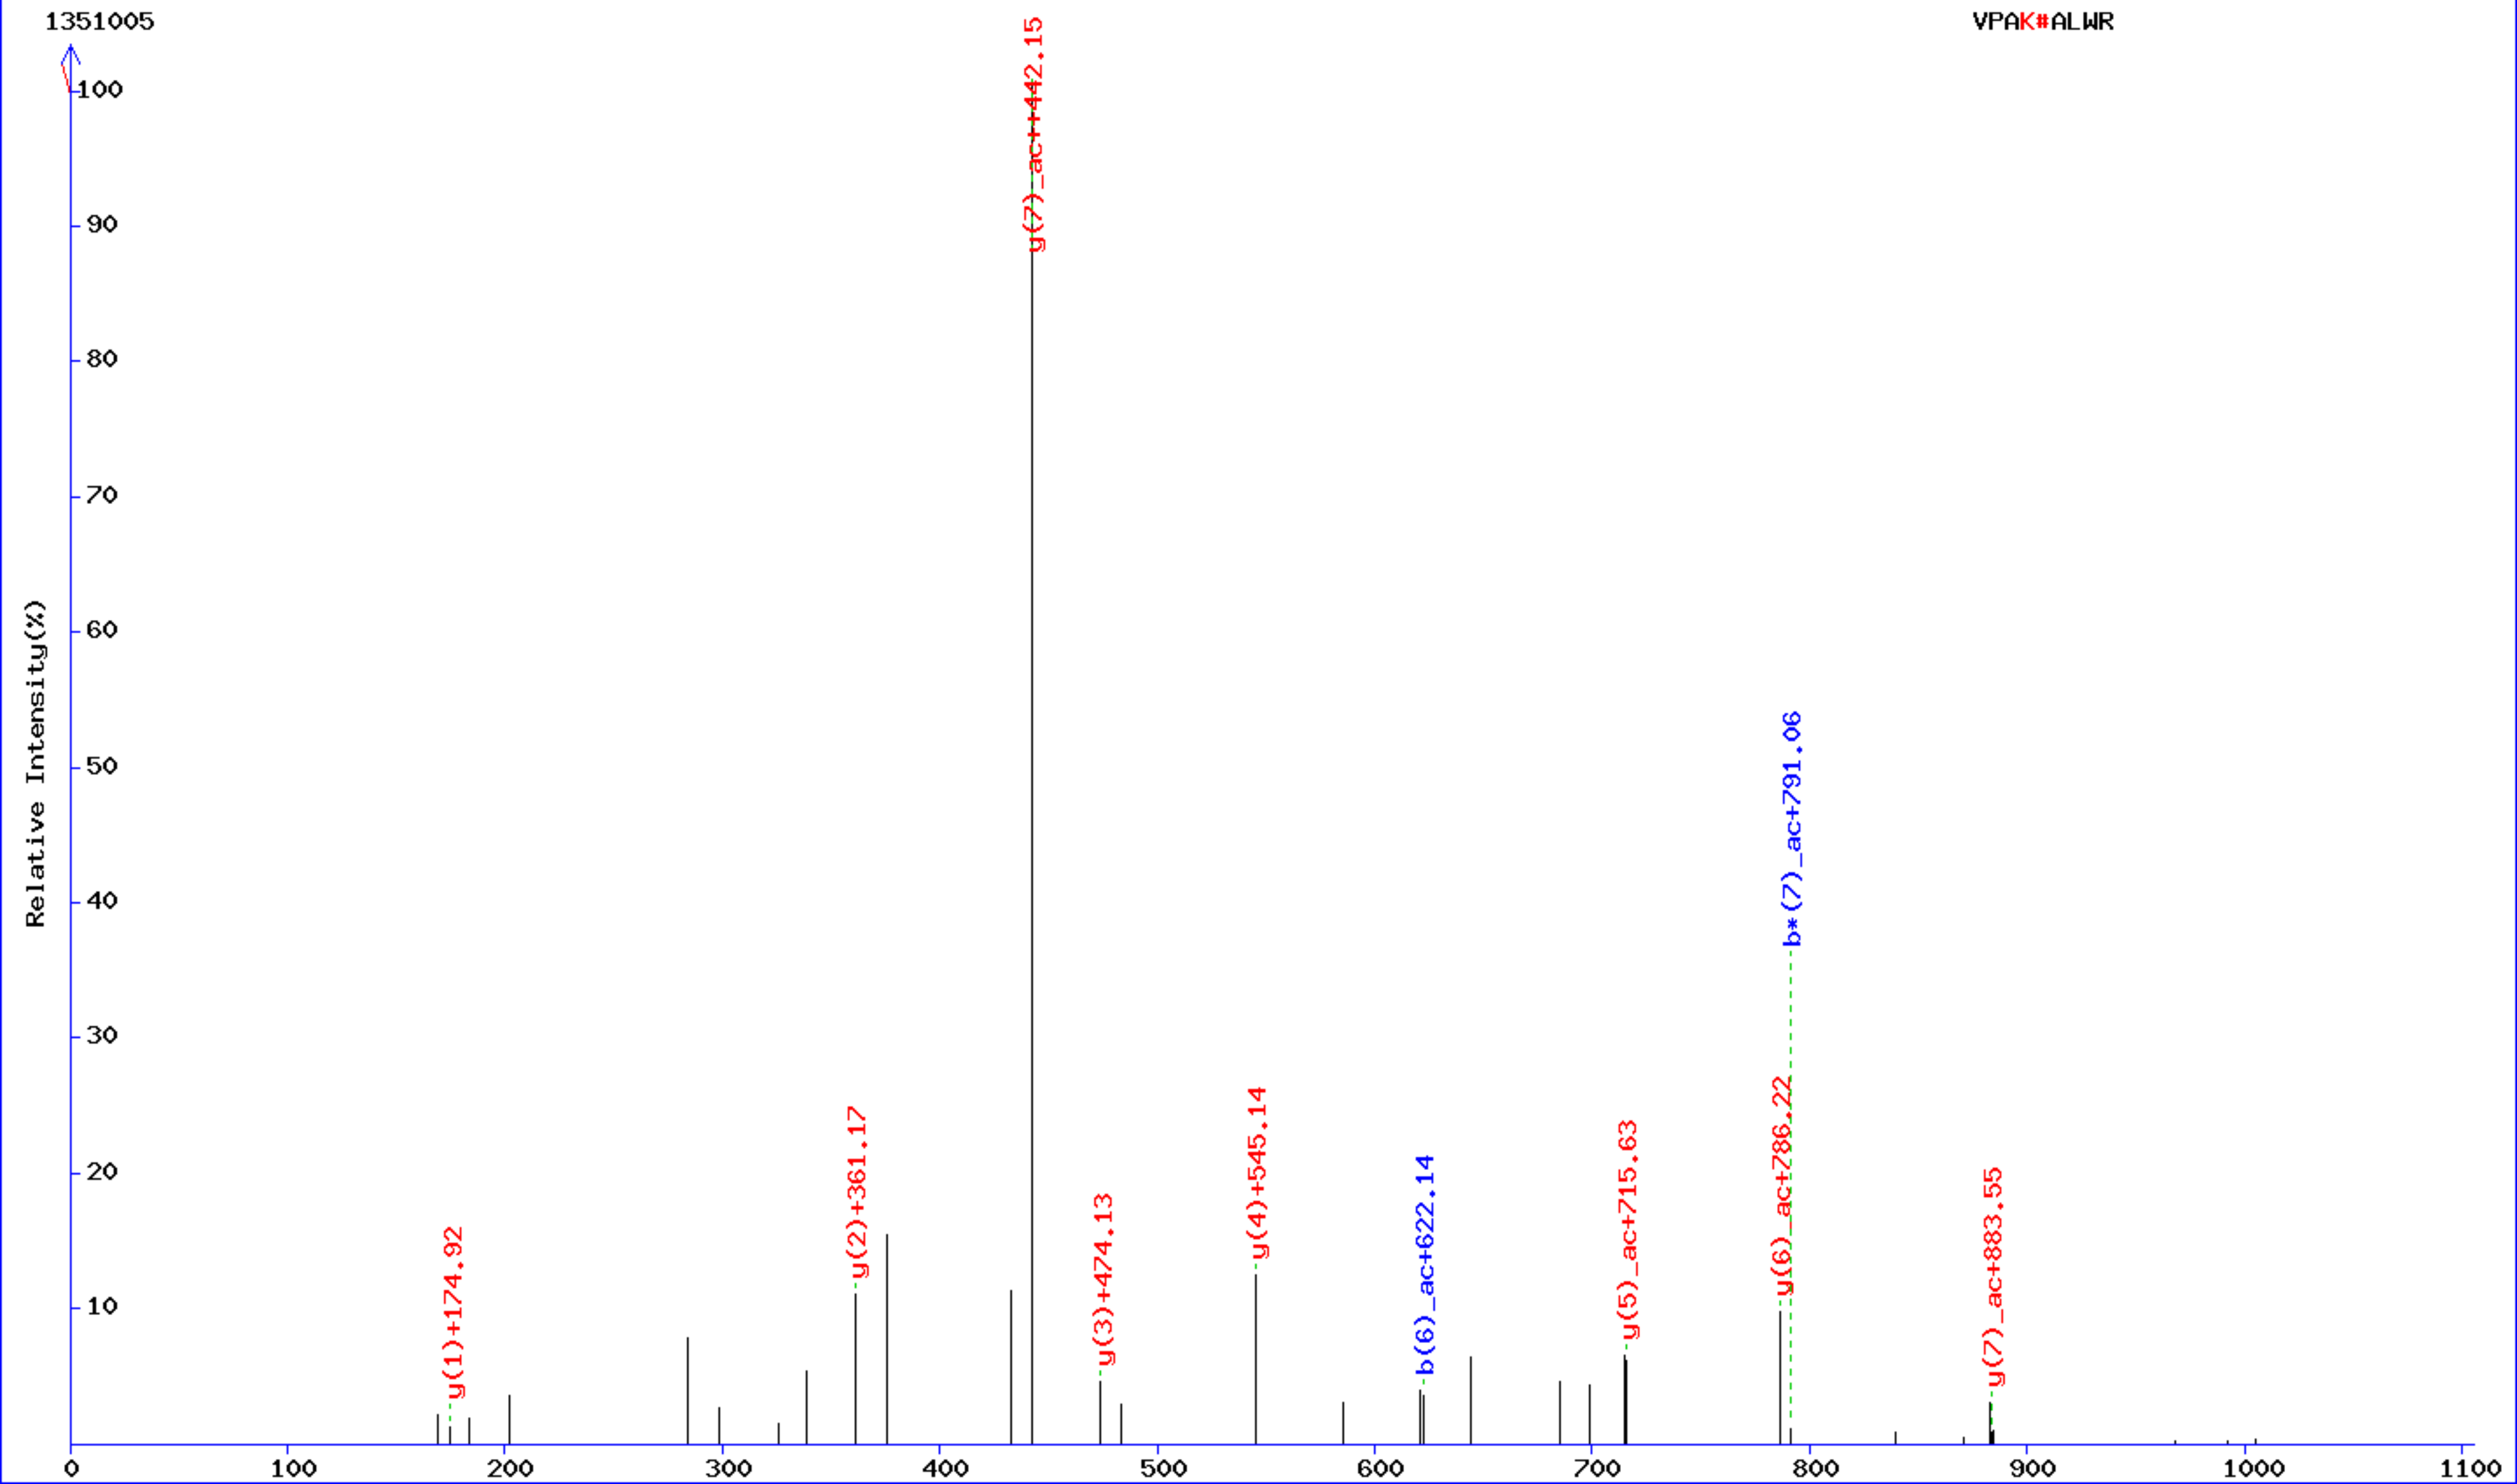

# gi|148661974 MRA\_2173 UDP-N-acetylmuramoylalanyl-D-glutamate--2,6-diaminopimelate ligase

GQGFLALVDYAHK#PEALR

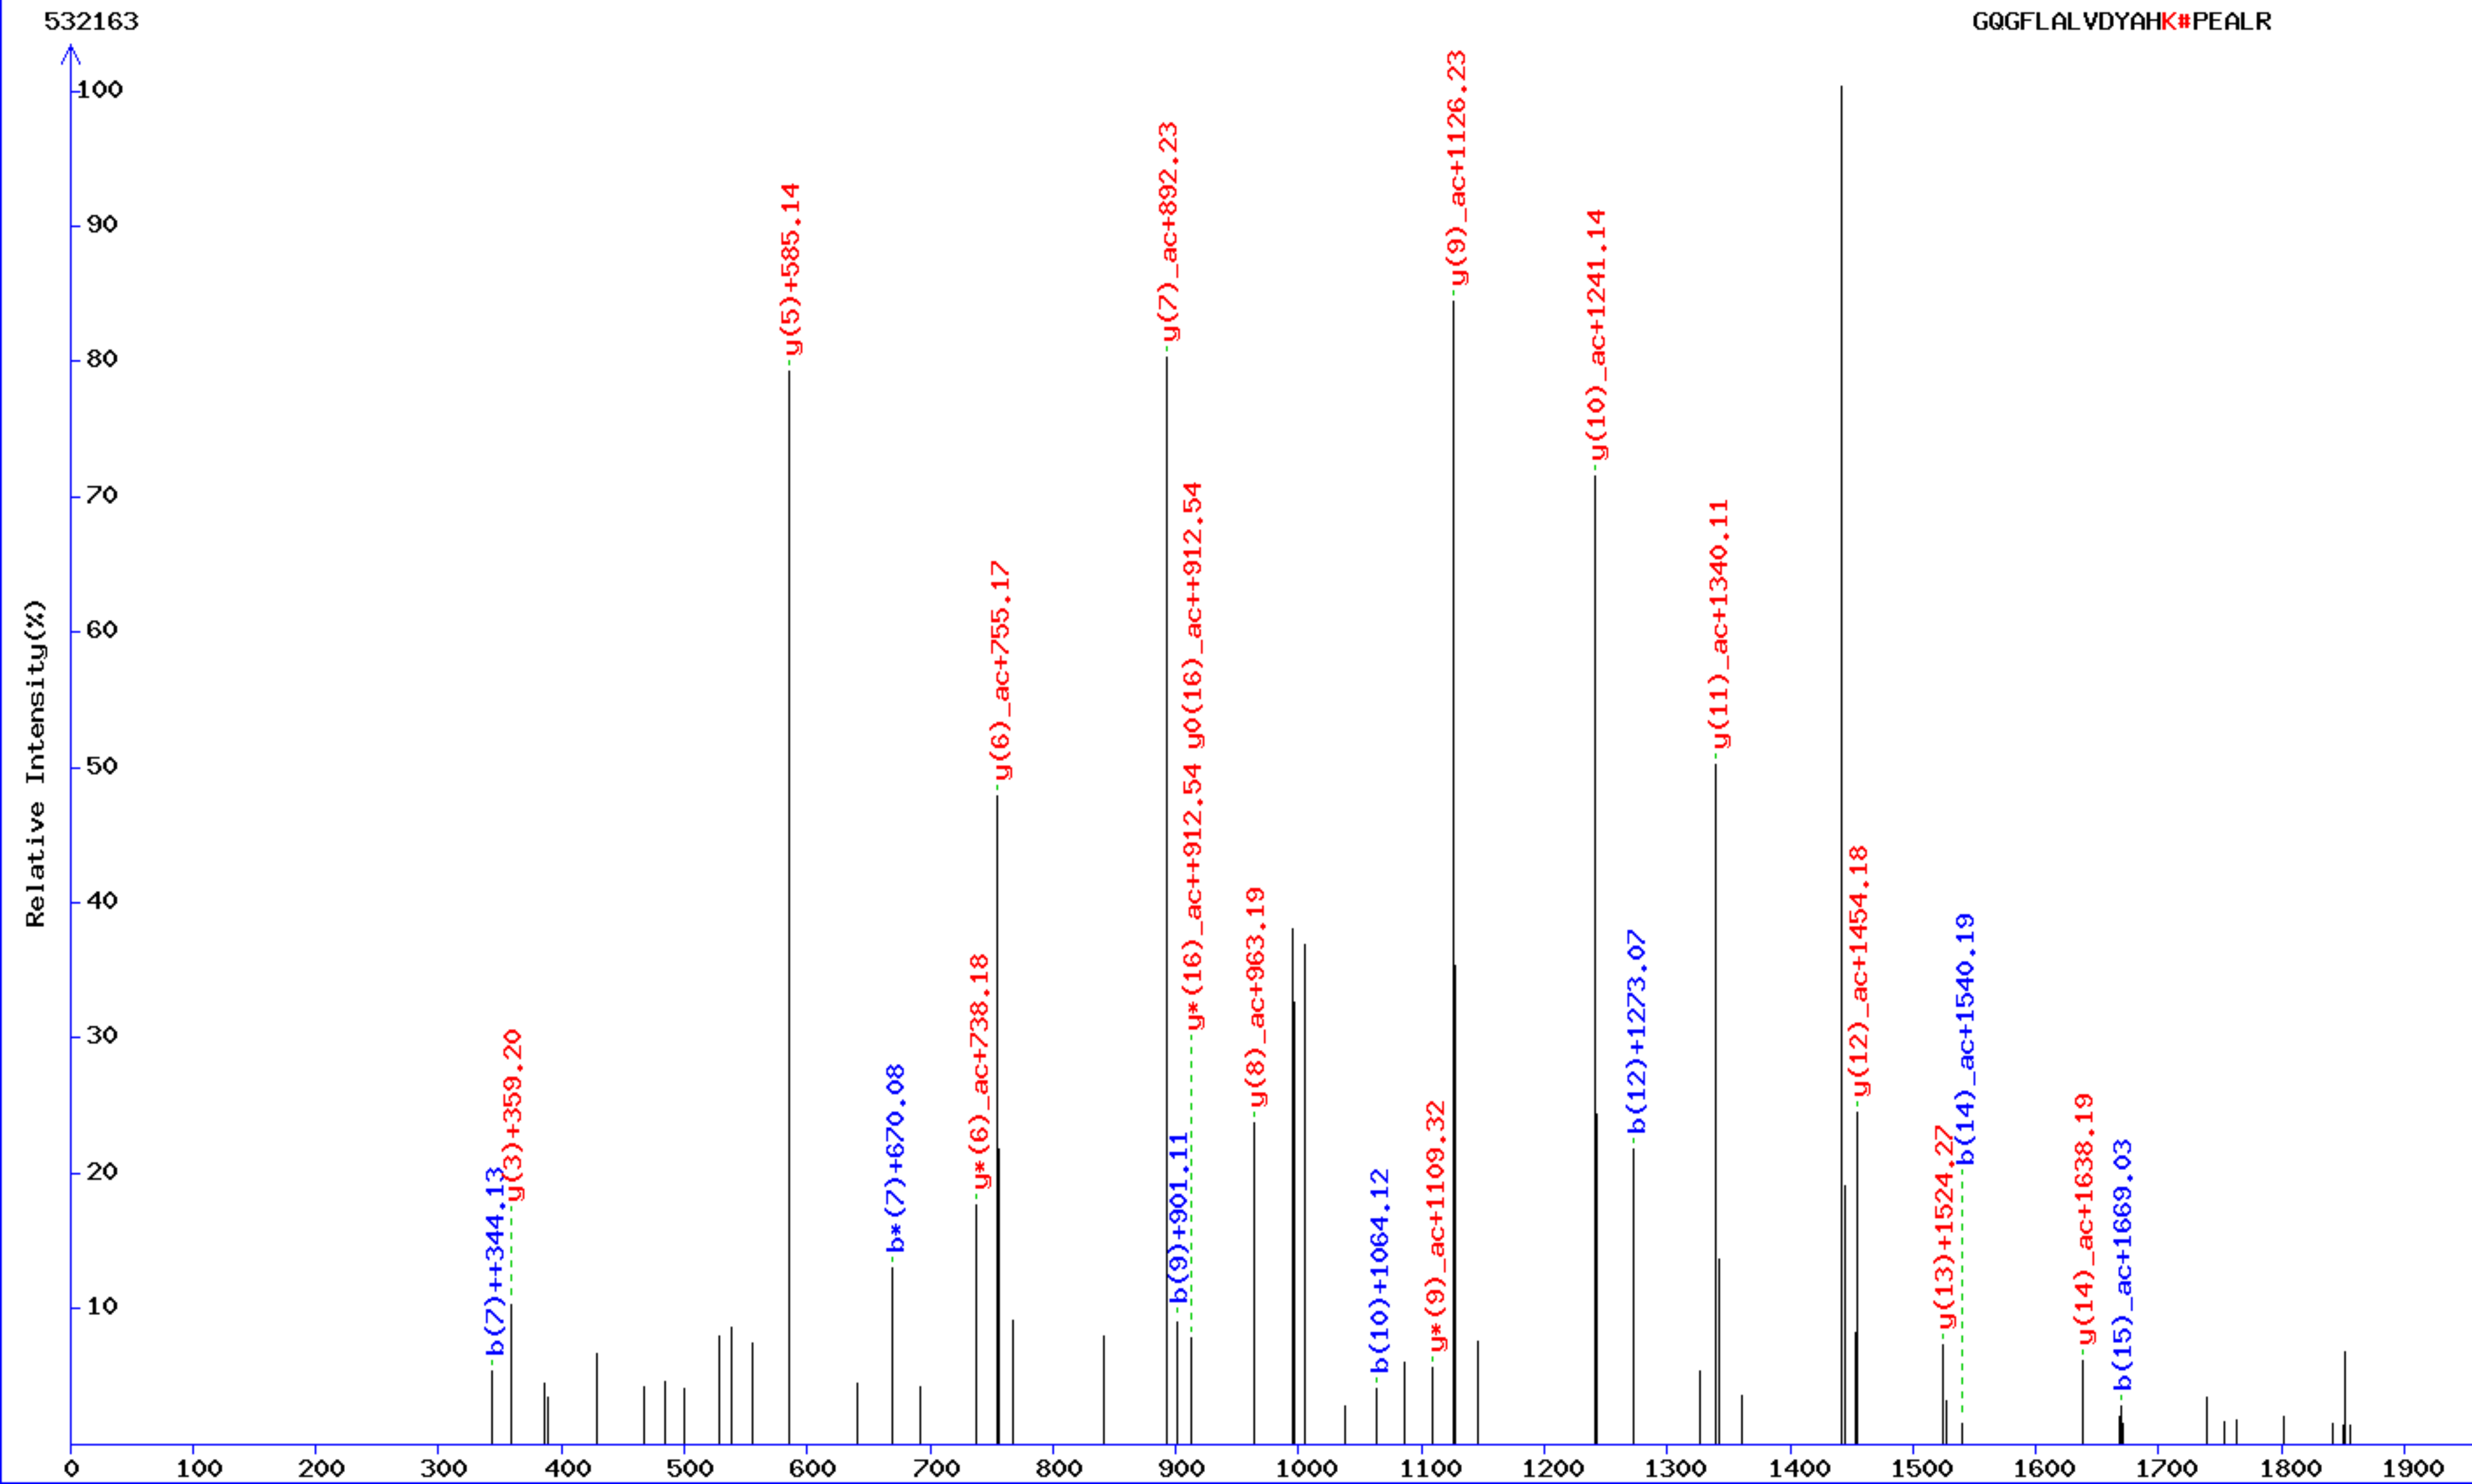

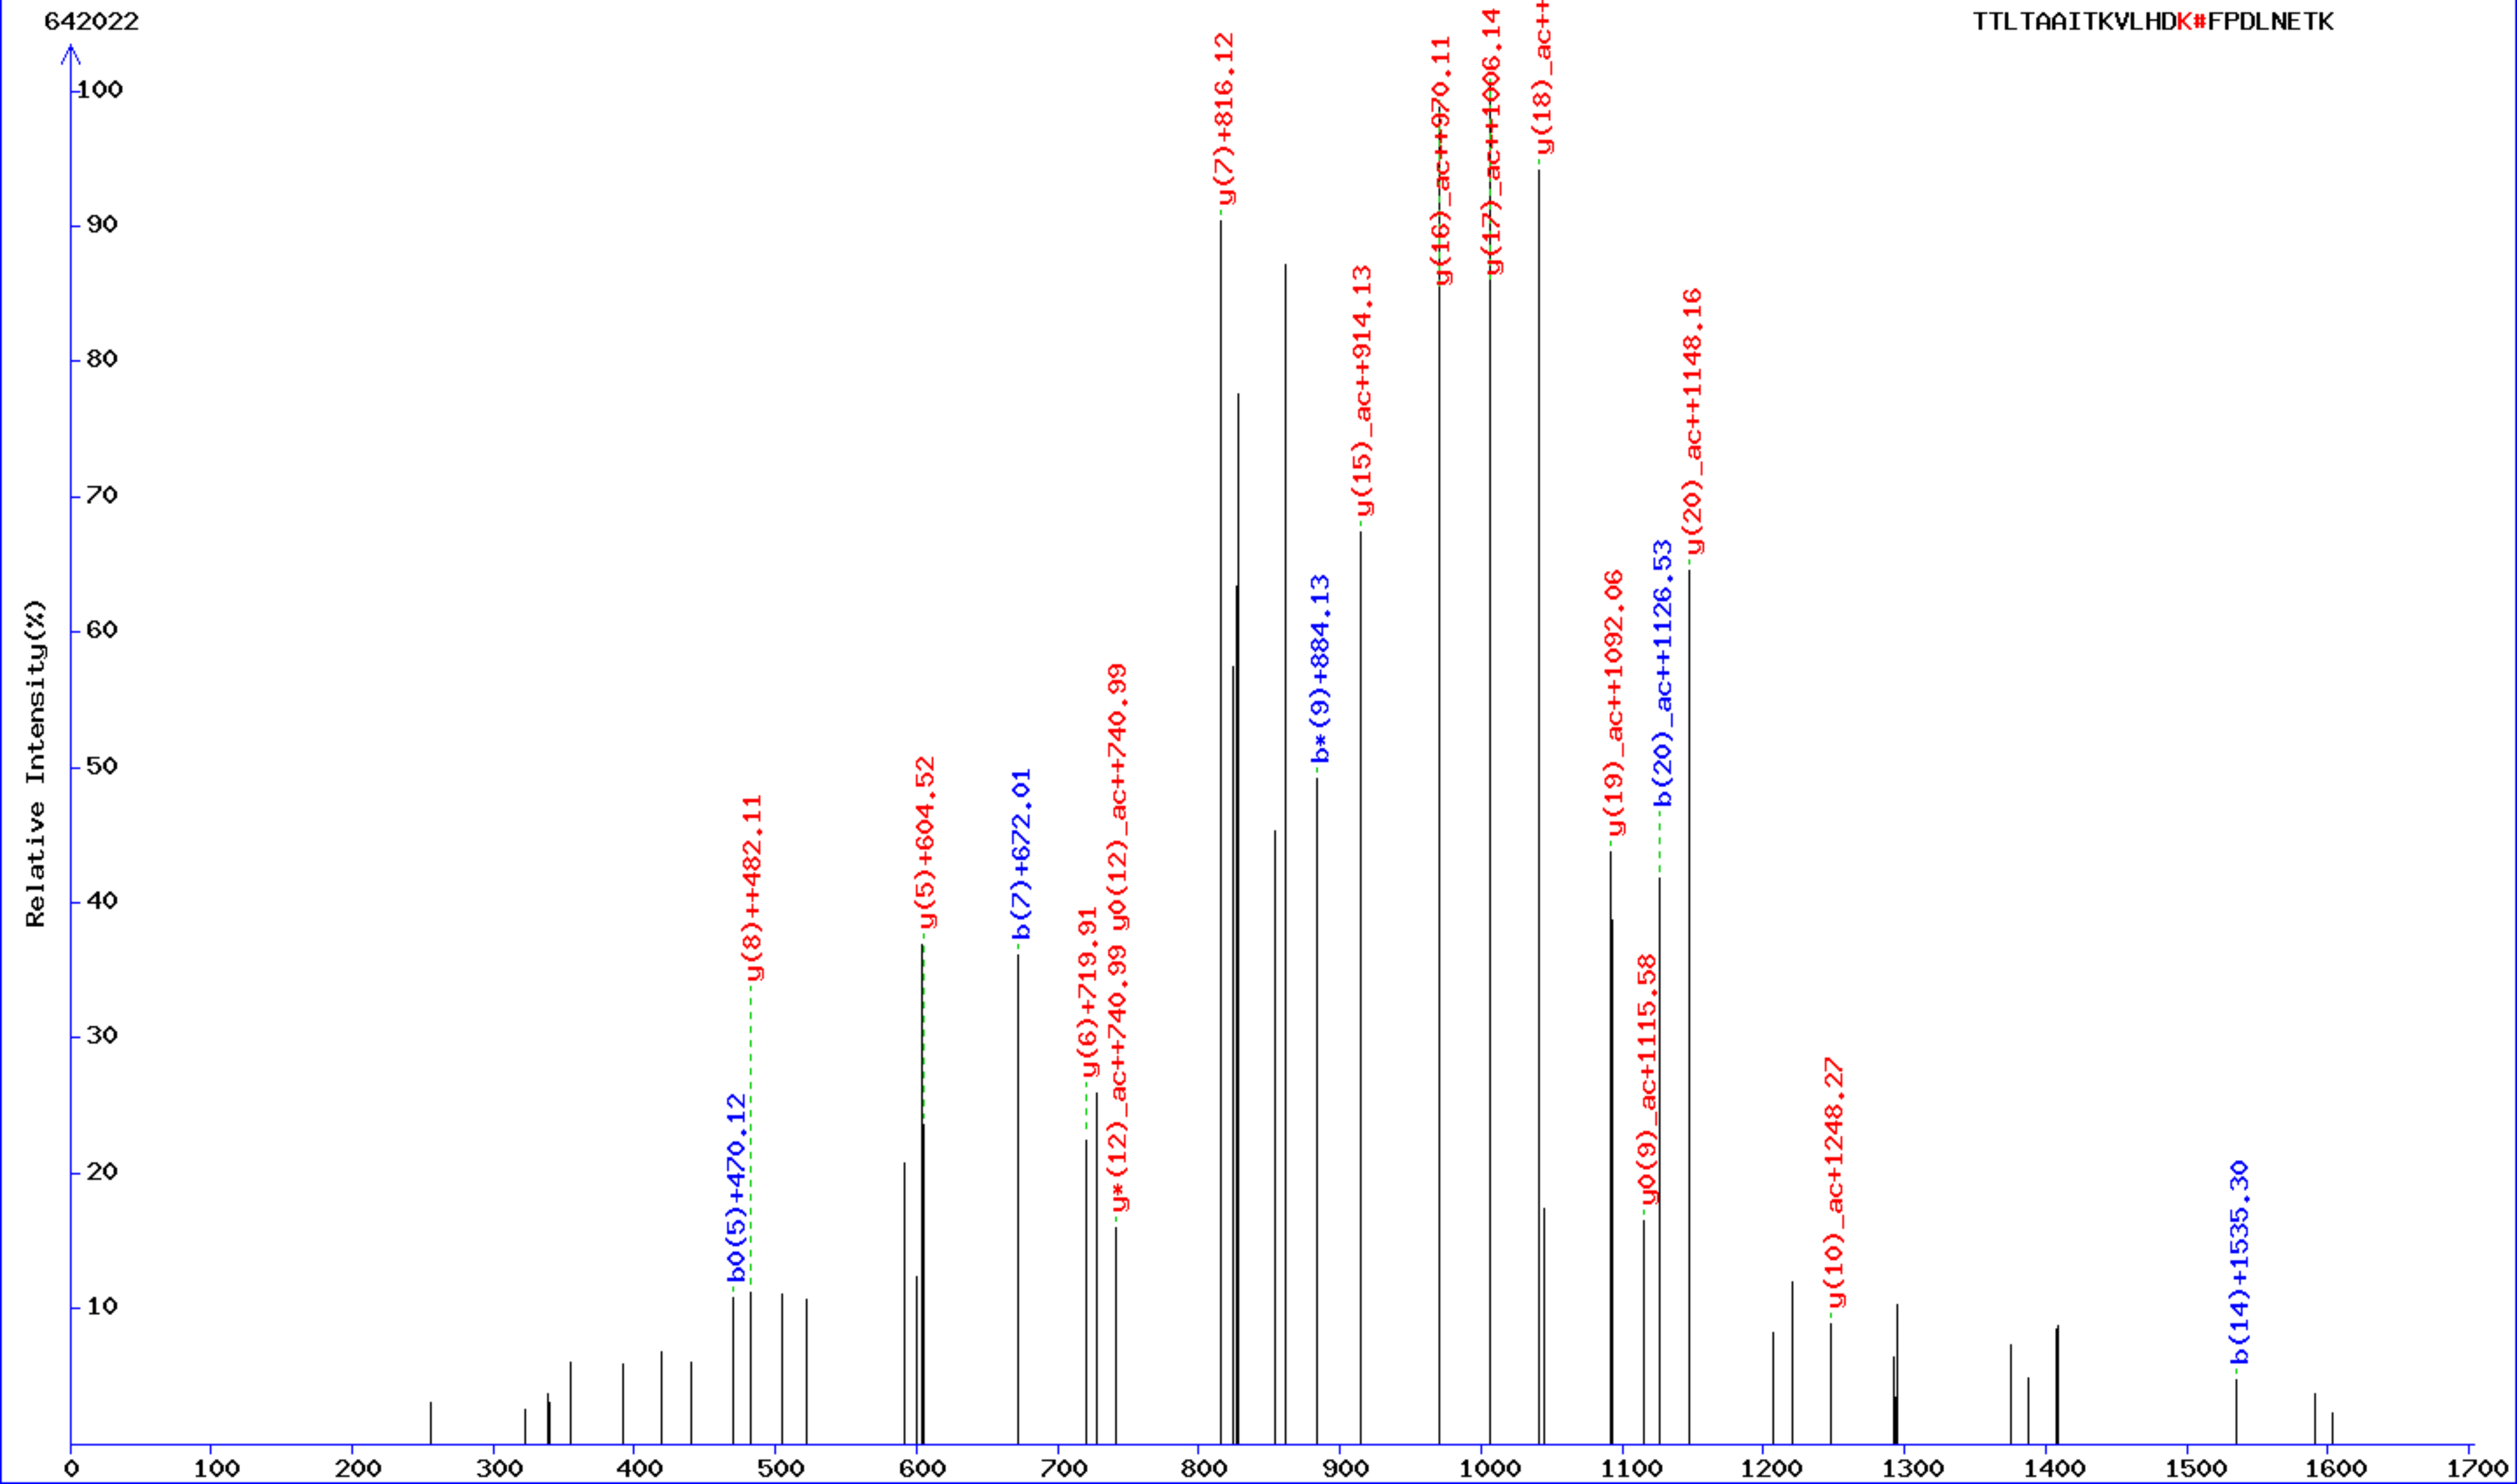

# gi|148660602 MRA\_0834 fatty acid desaturase

KVSAHELHK#TAGK

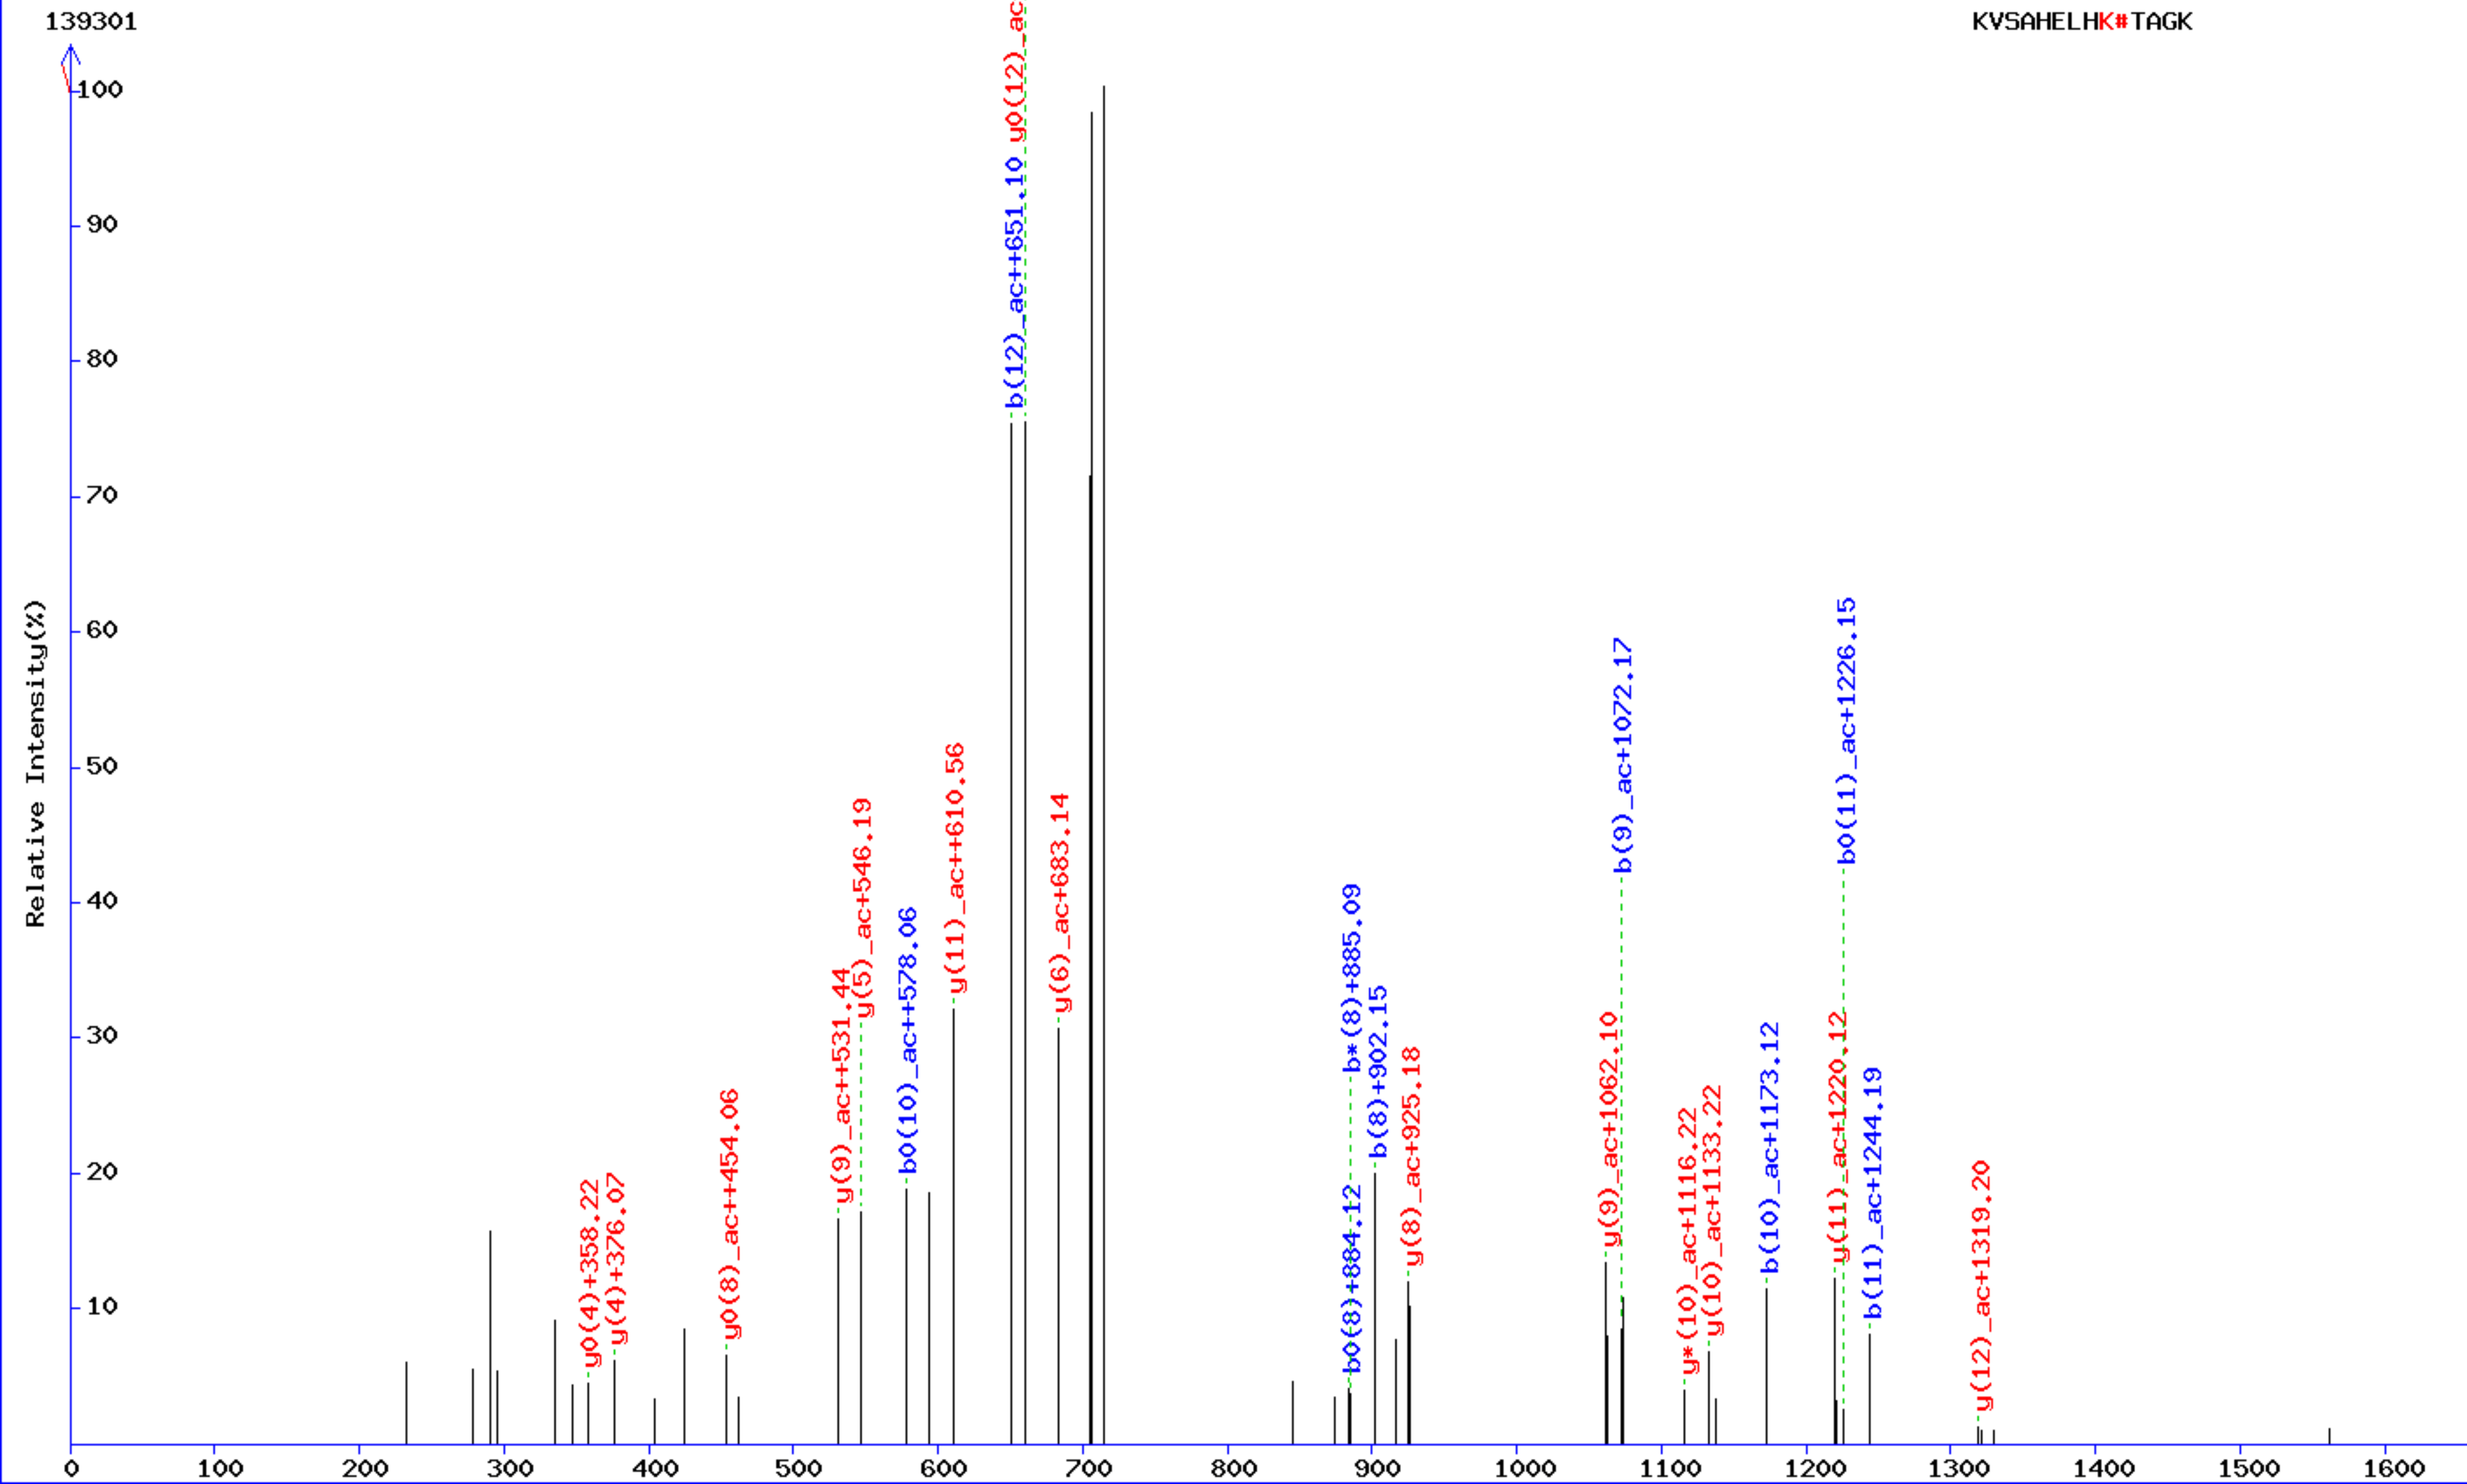

# gi|148660602 MRA\_0834 fatty acid desaturase

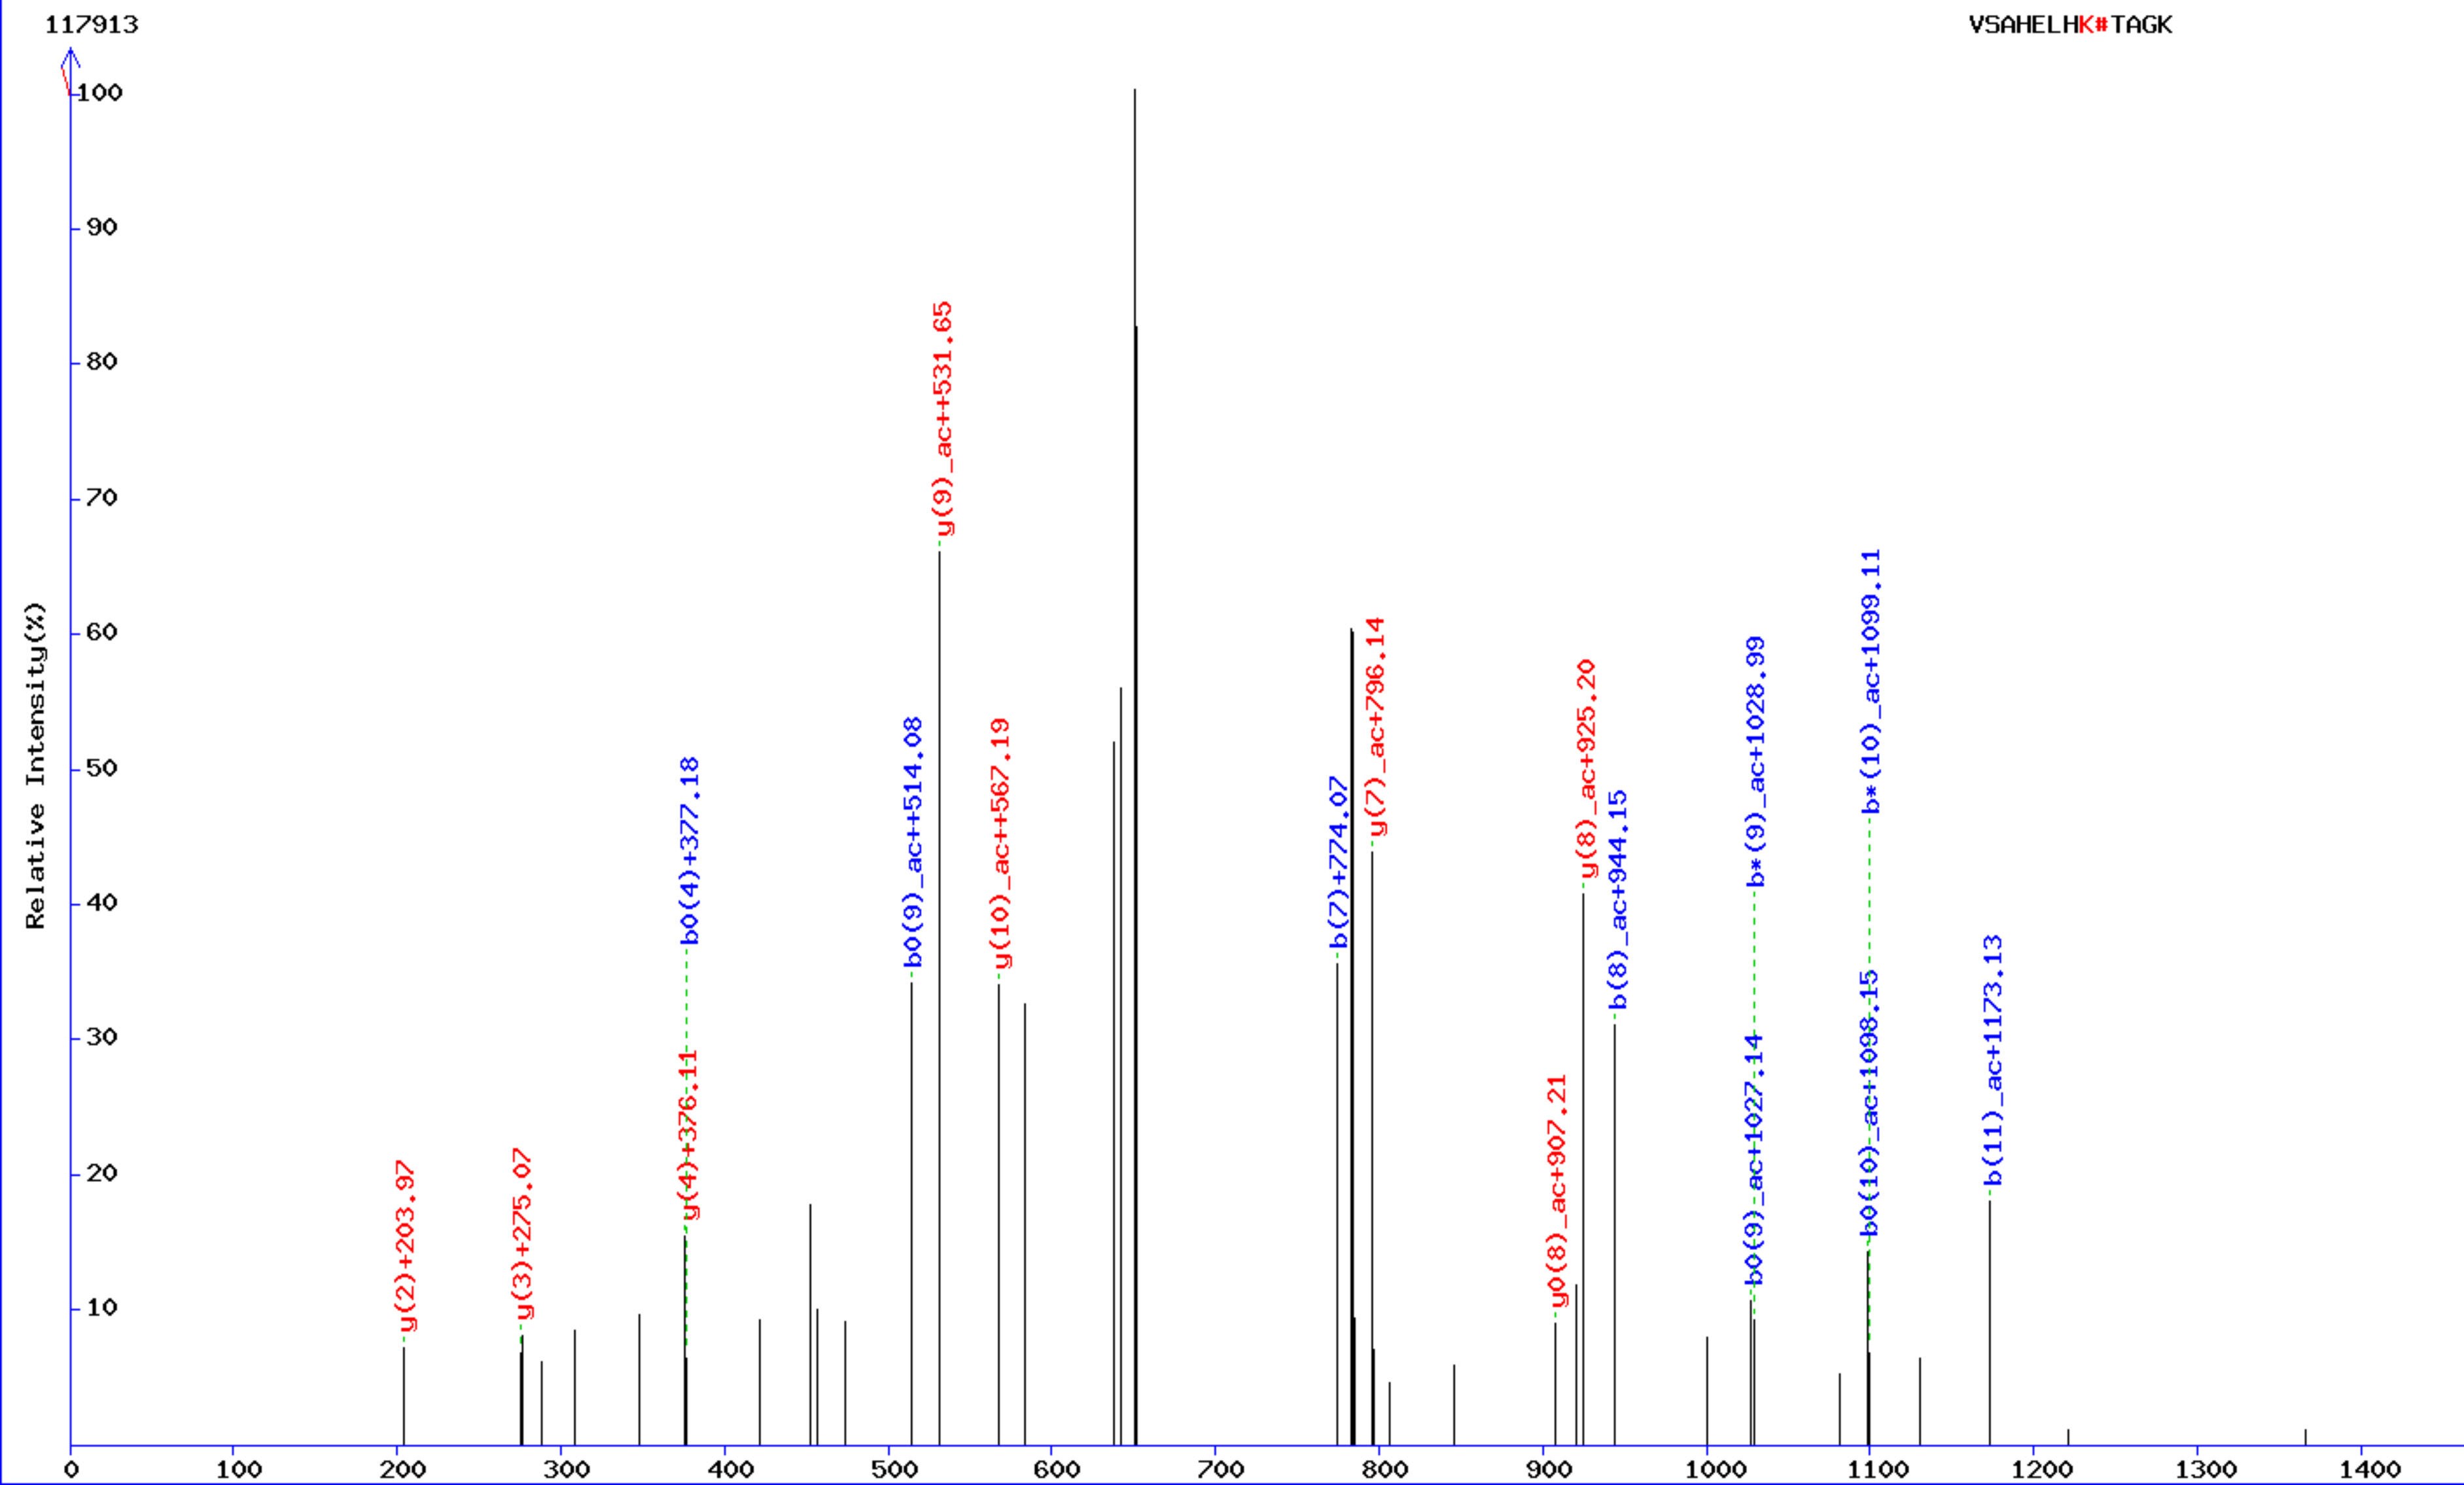

# gi|148663322 MRA\_3498 DNA-directed RNA polymerase subunit alpha

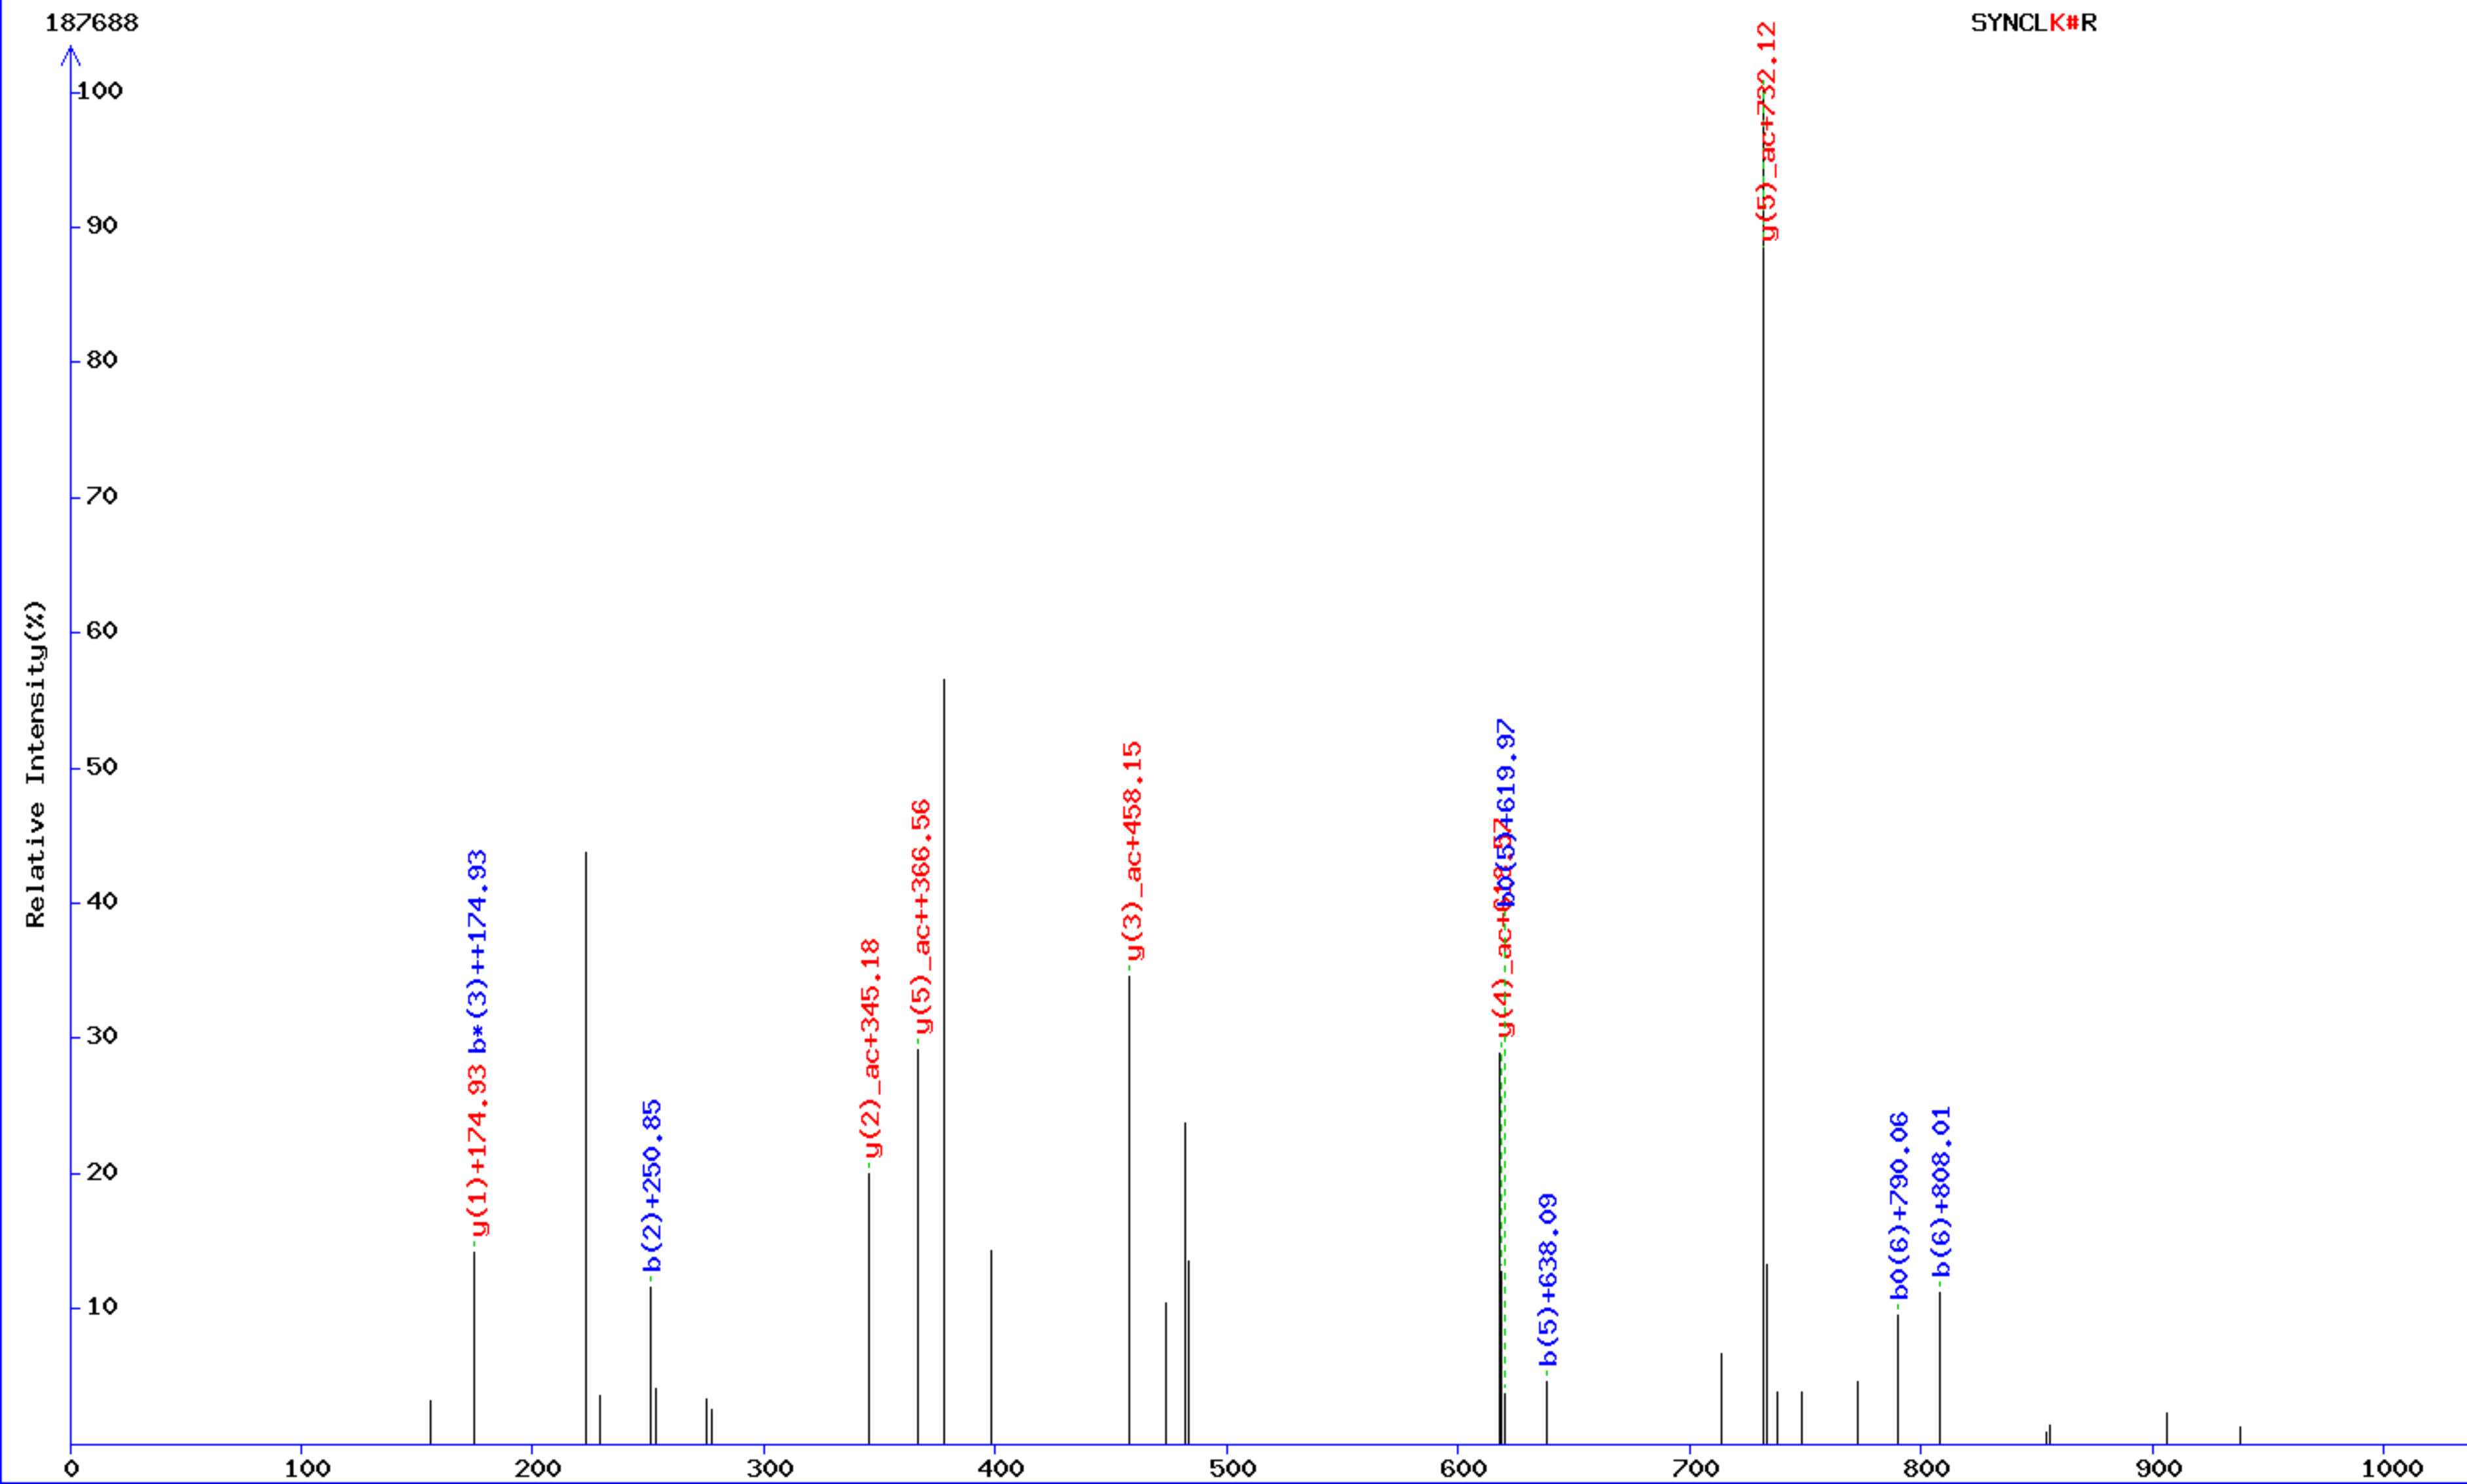



# gi|148663137 MRA\_3315 acyl-CoA dehydrogenase

EIAPHAAEVDEK#AR

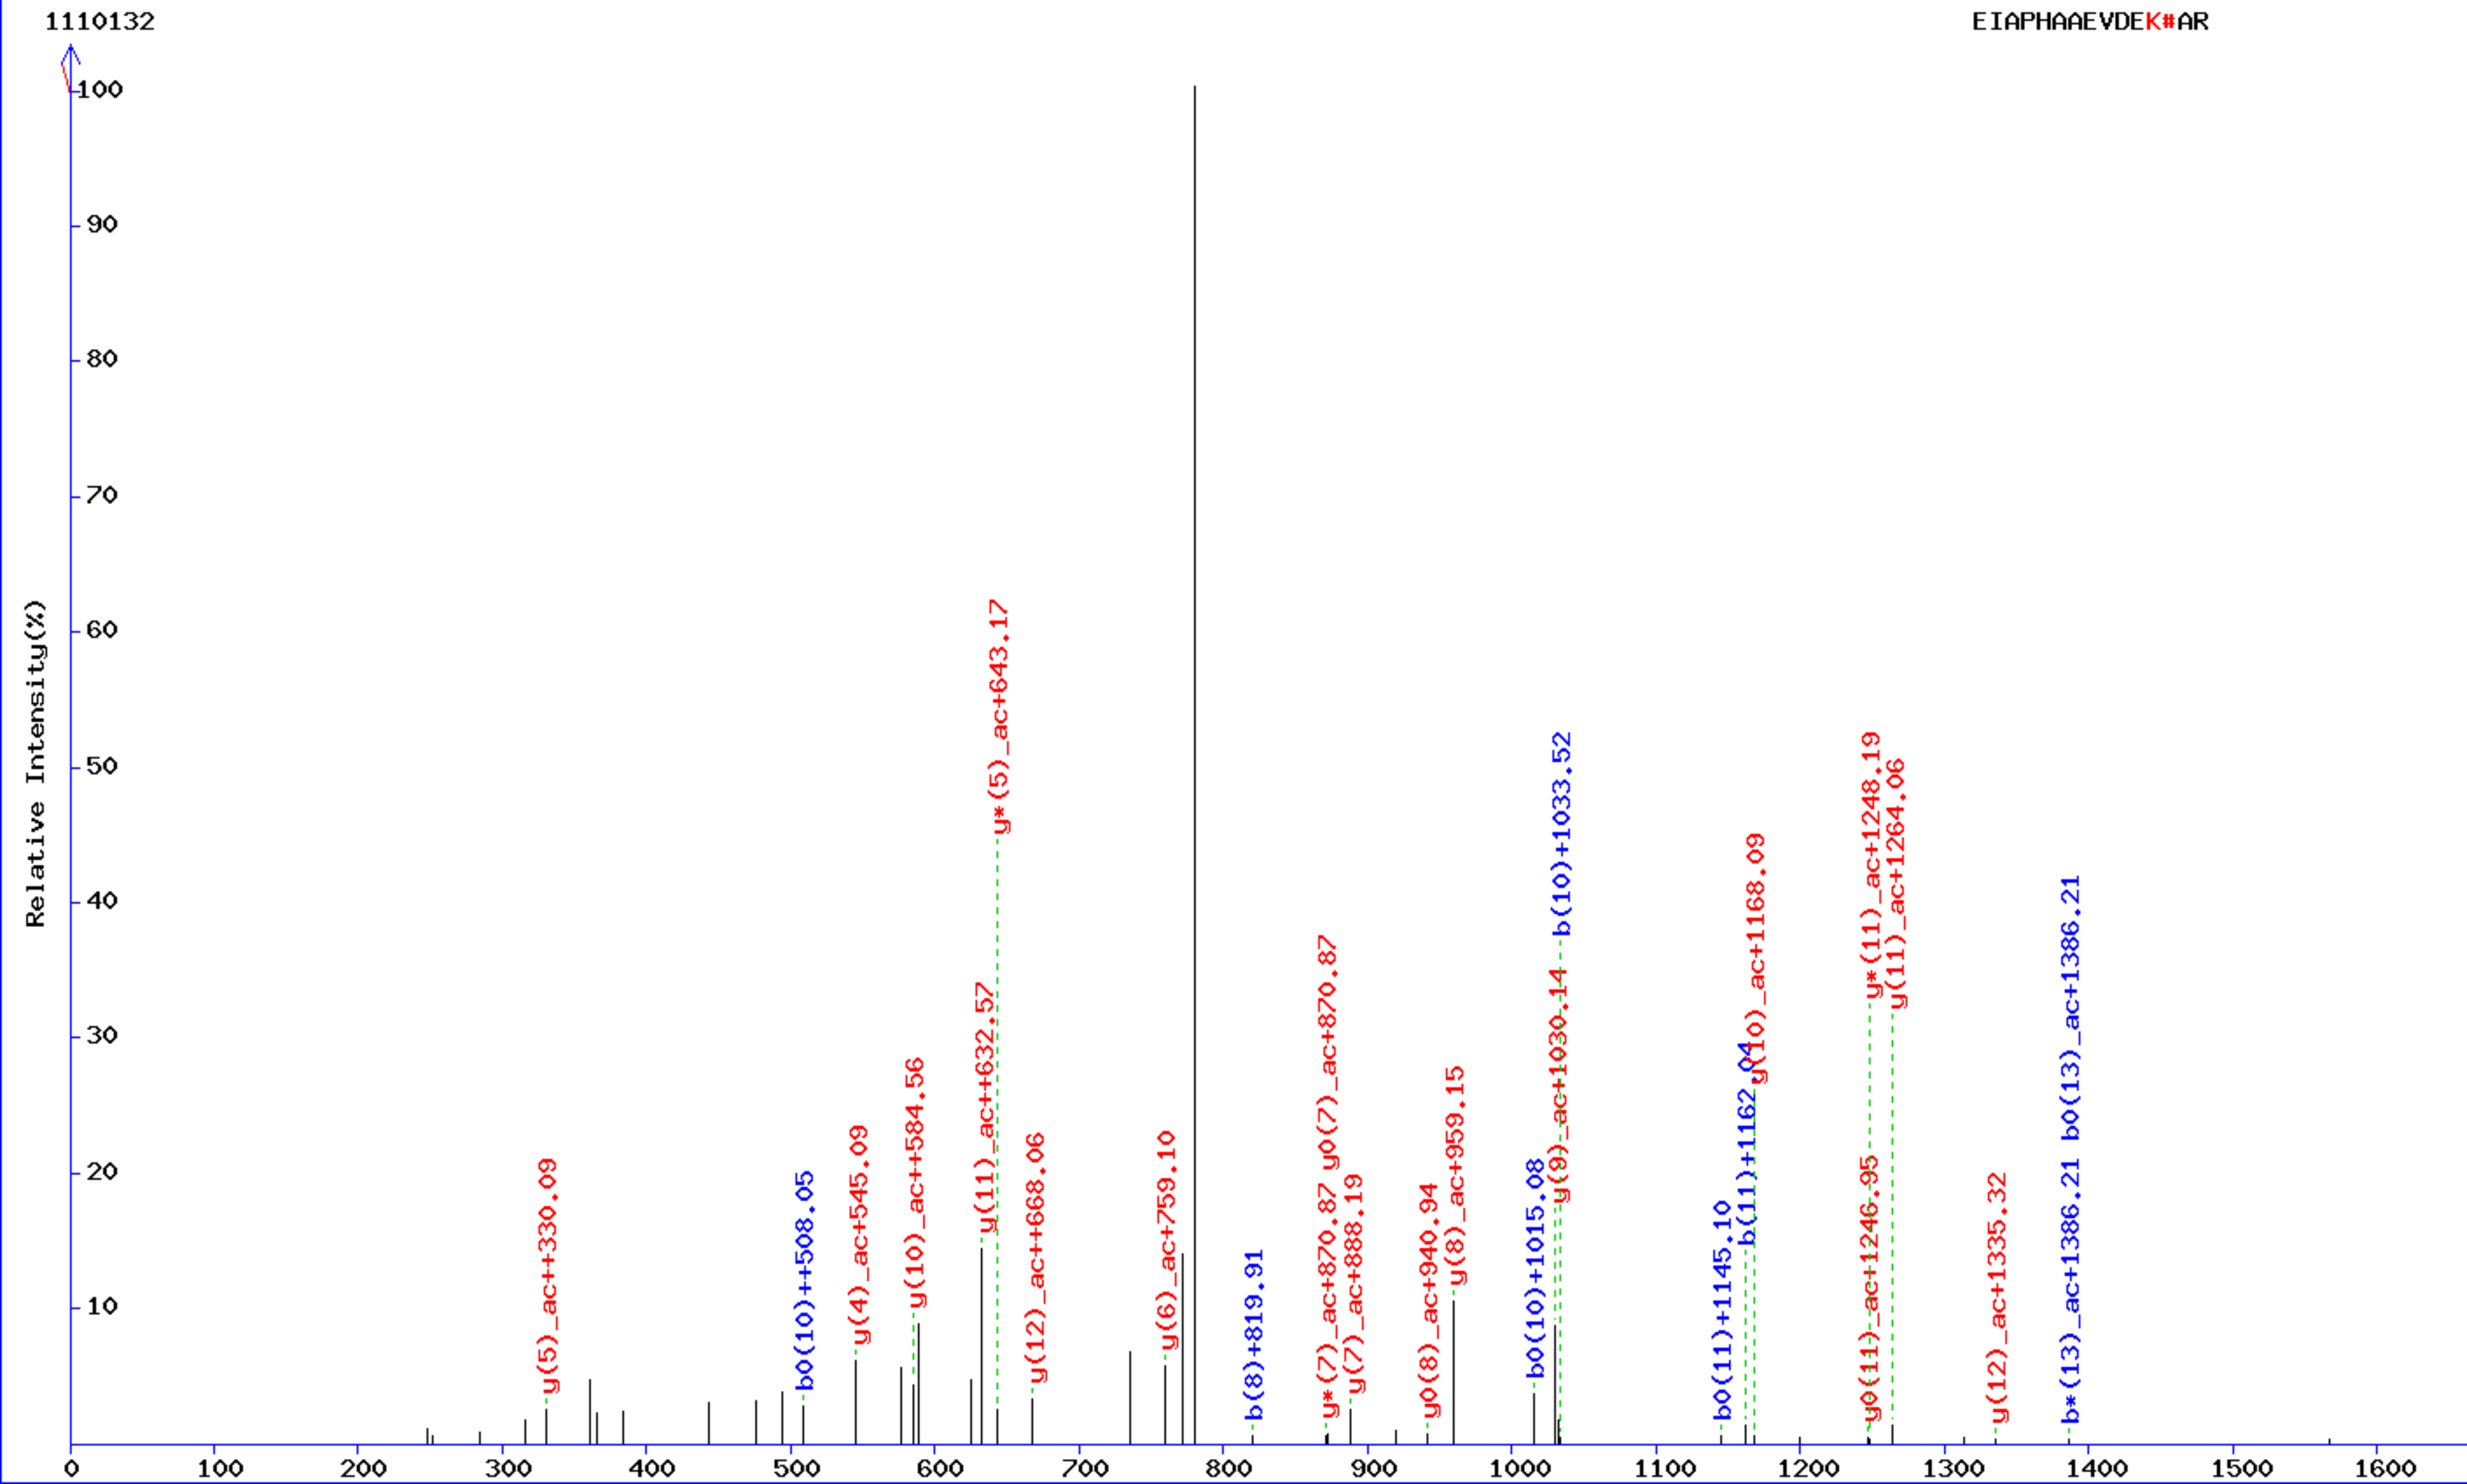

# gi|148660661 MRA\_0891 phosphoserine aminotransferase

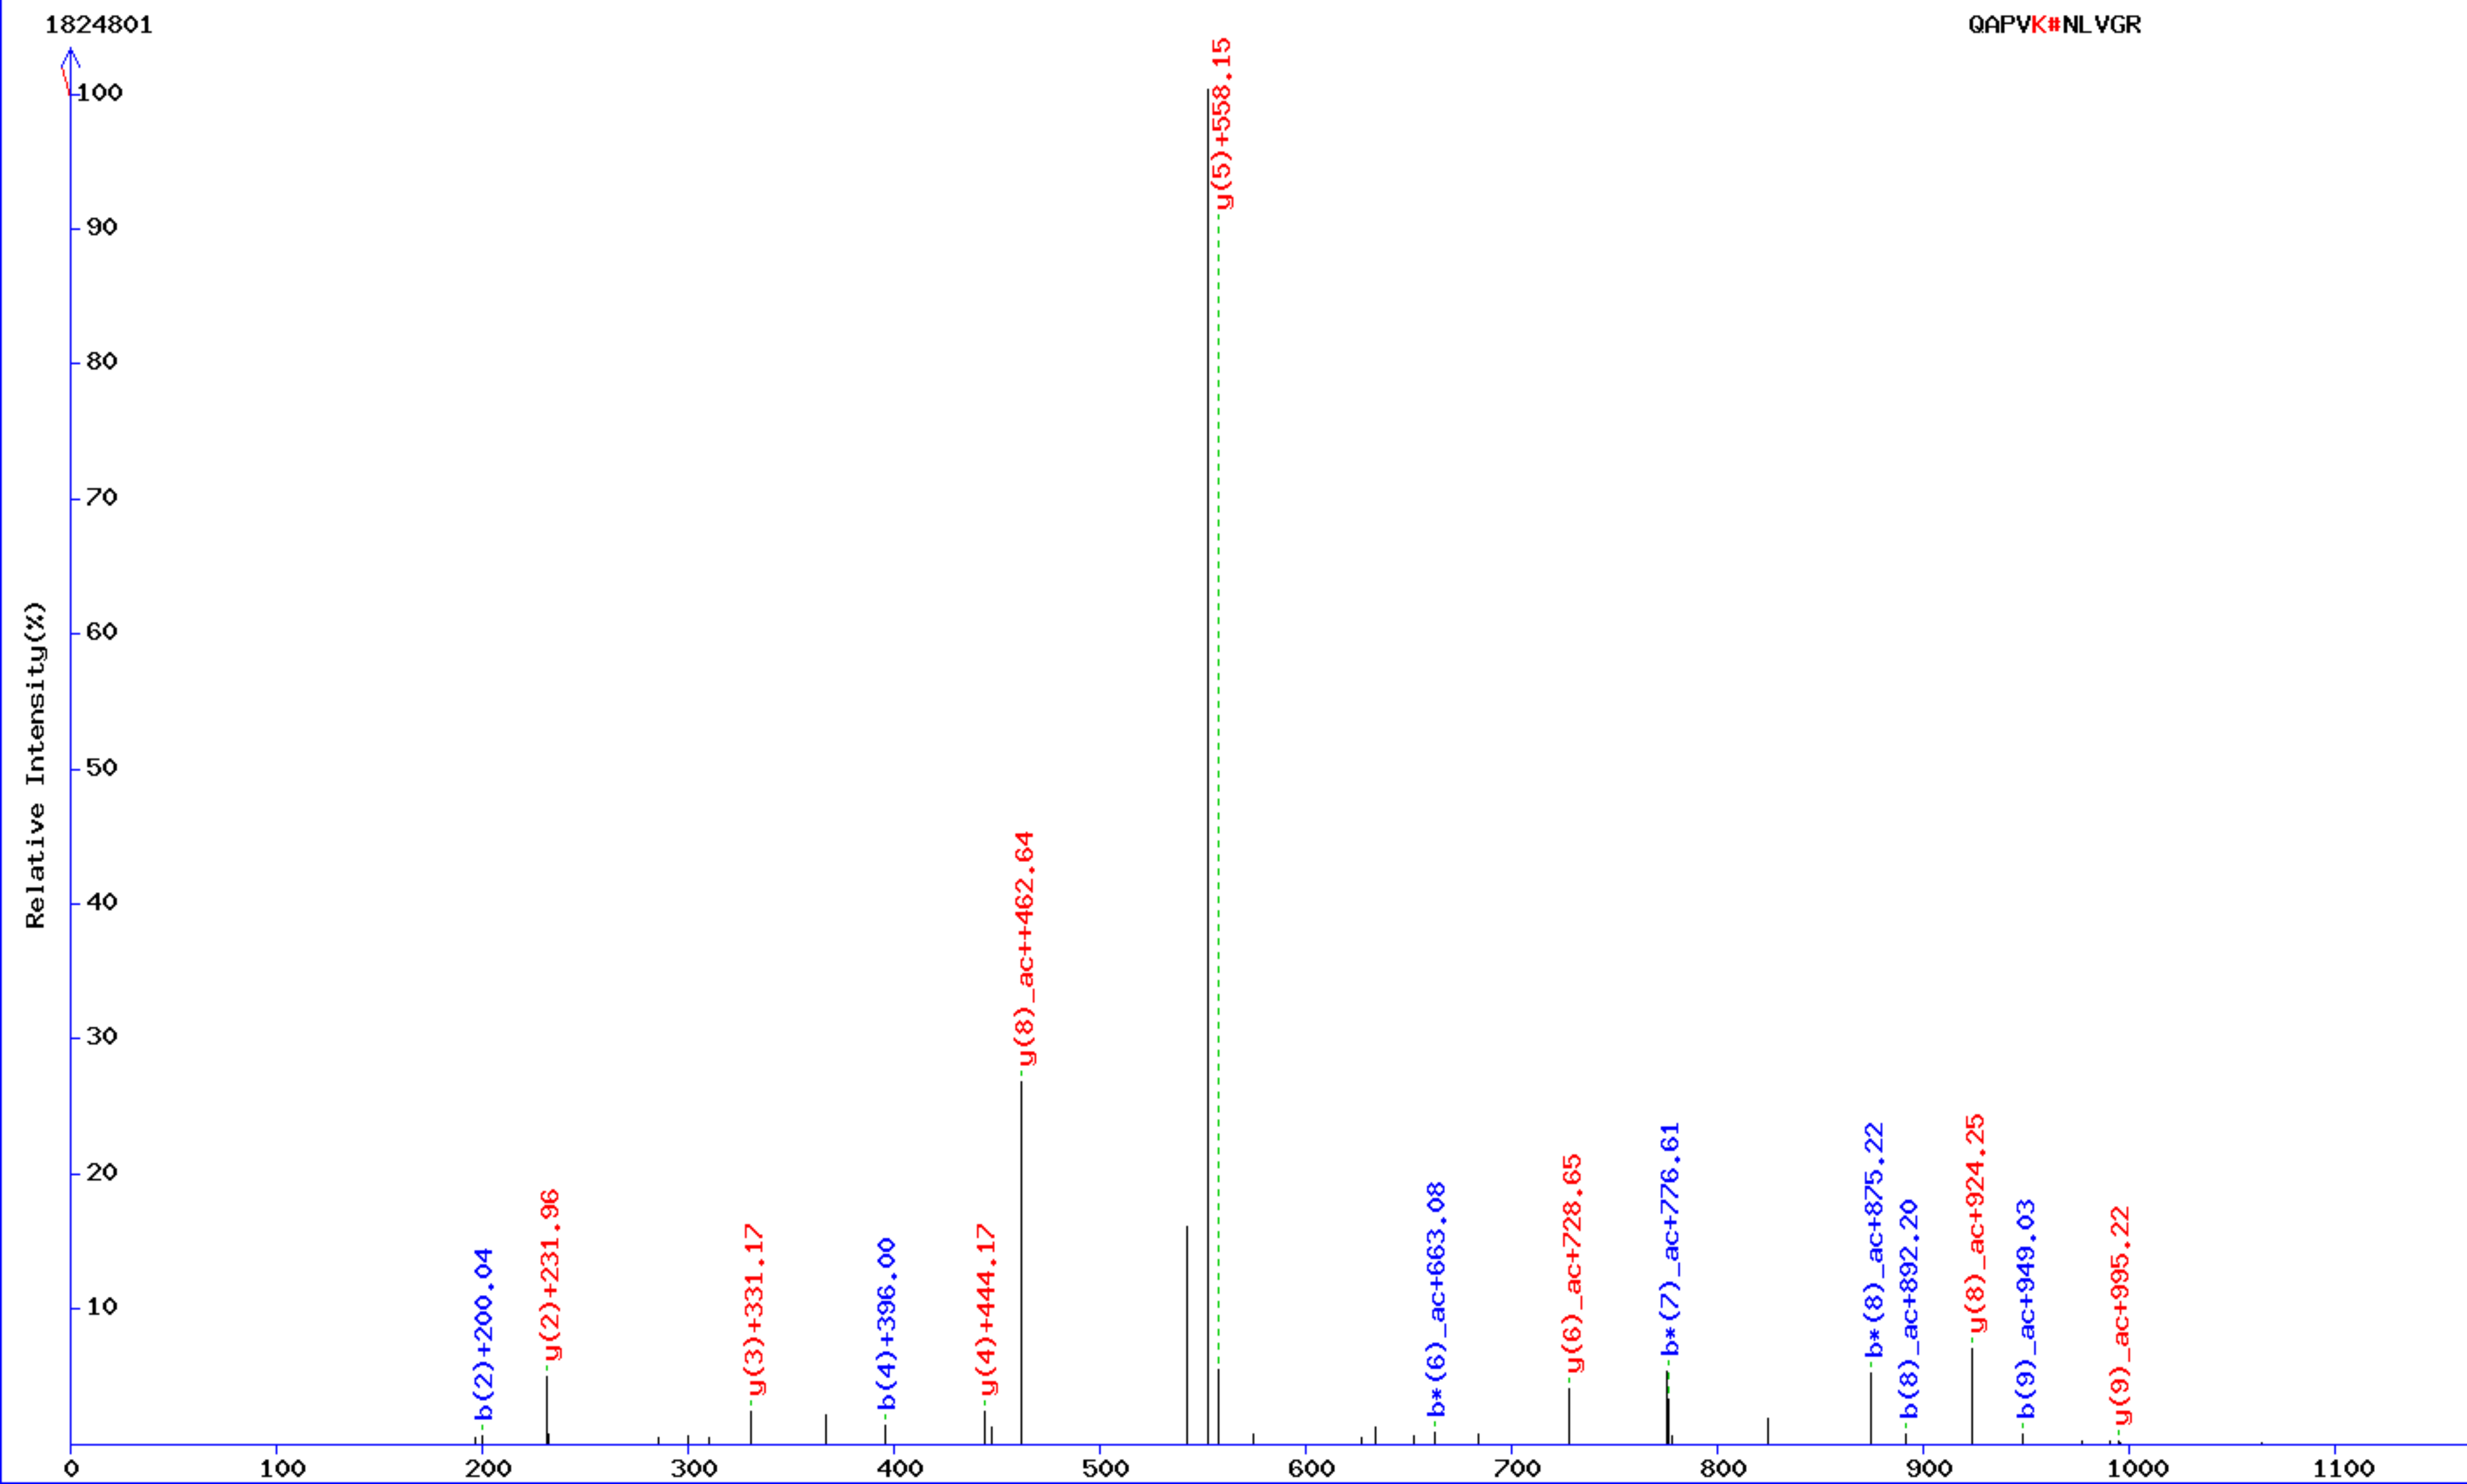

# gi|148660416 MRA\_0653 methoxy mycolic acid synthase 4

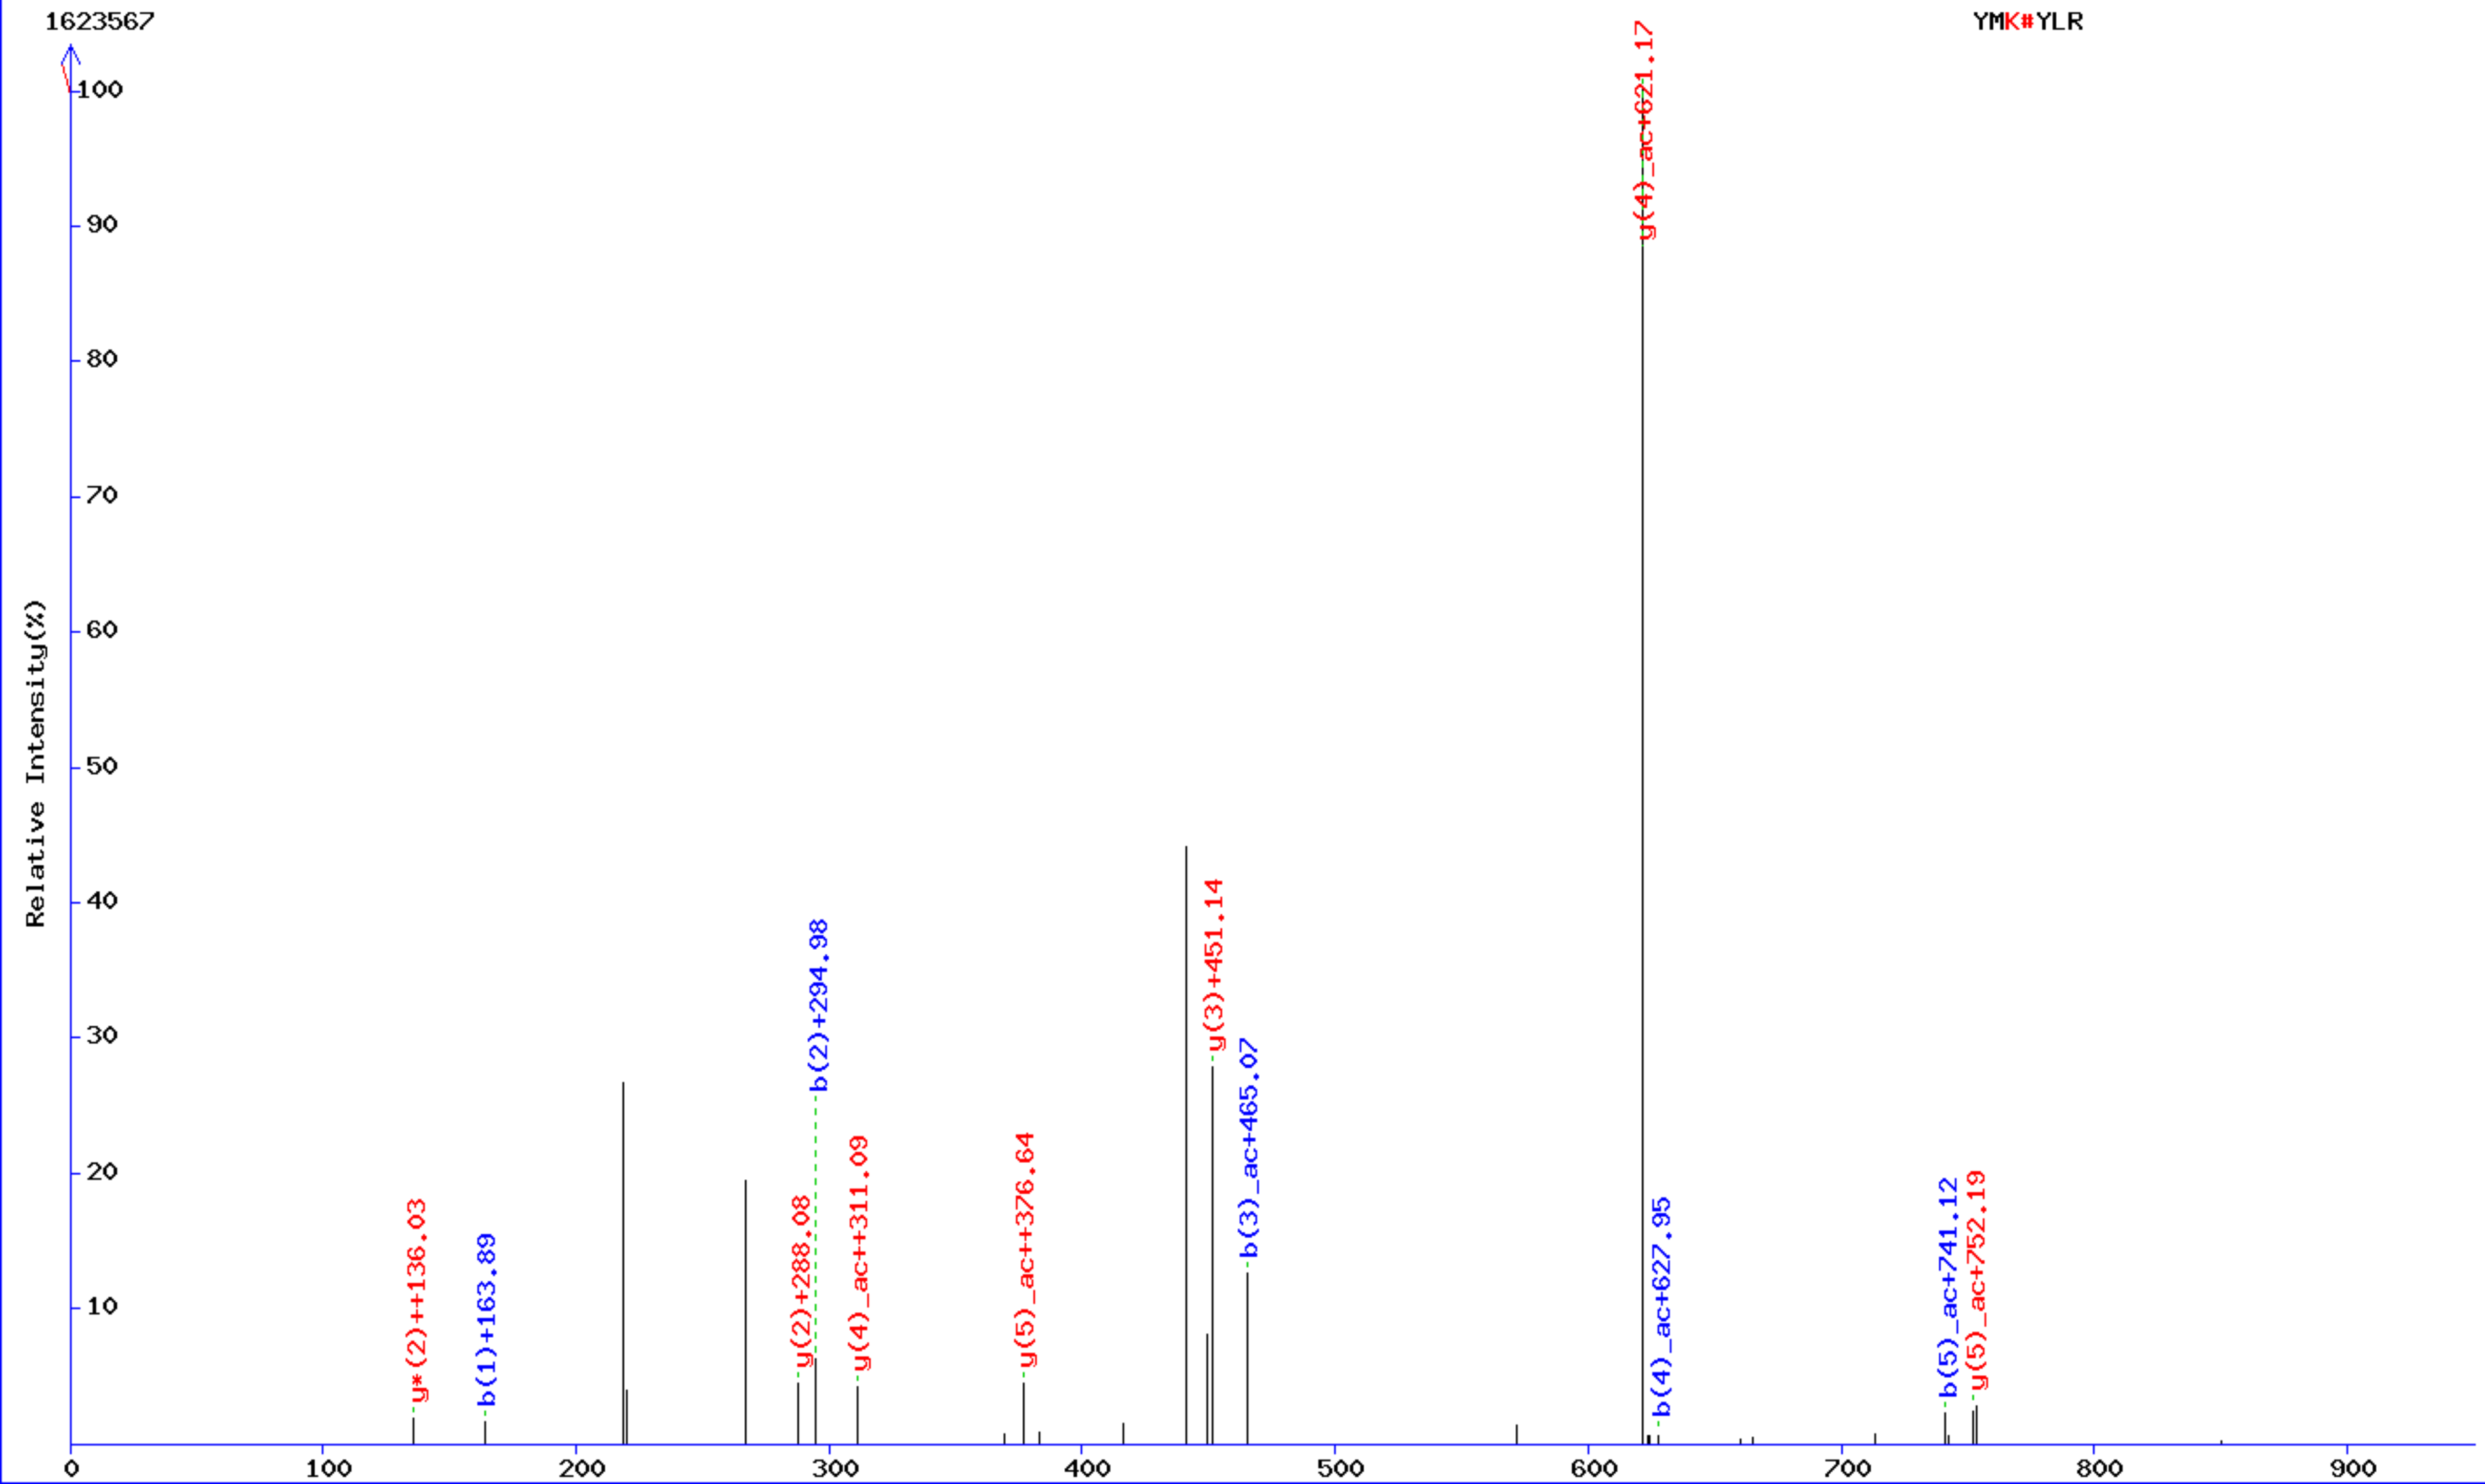

# gi|148660256 MRA\_0496 phosphoglyceromutase

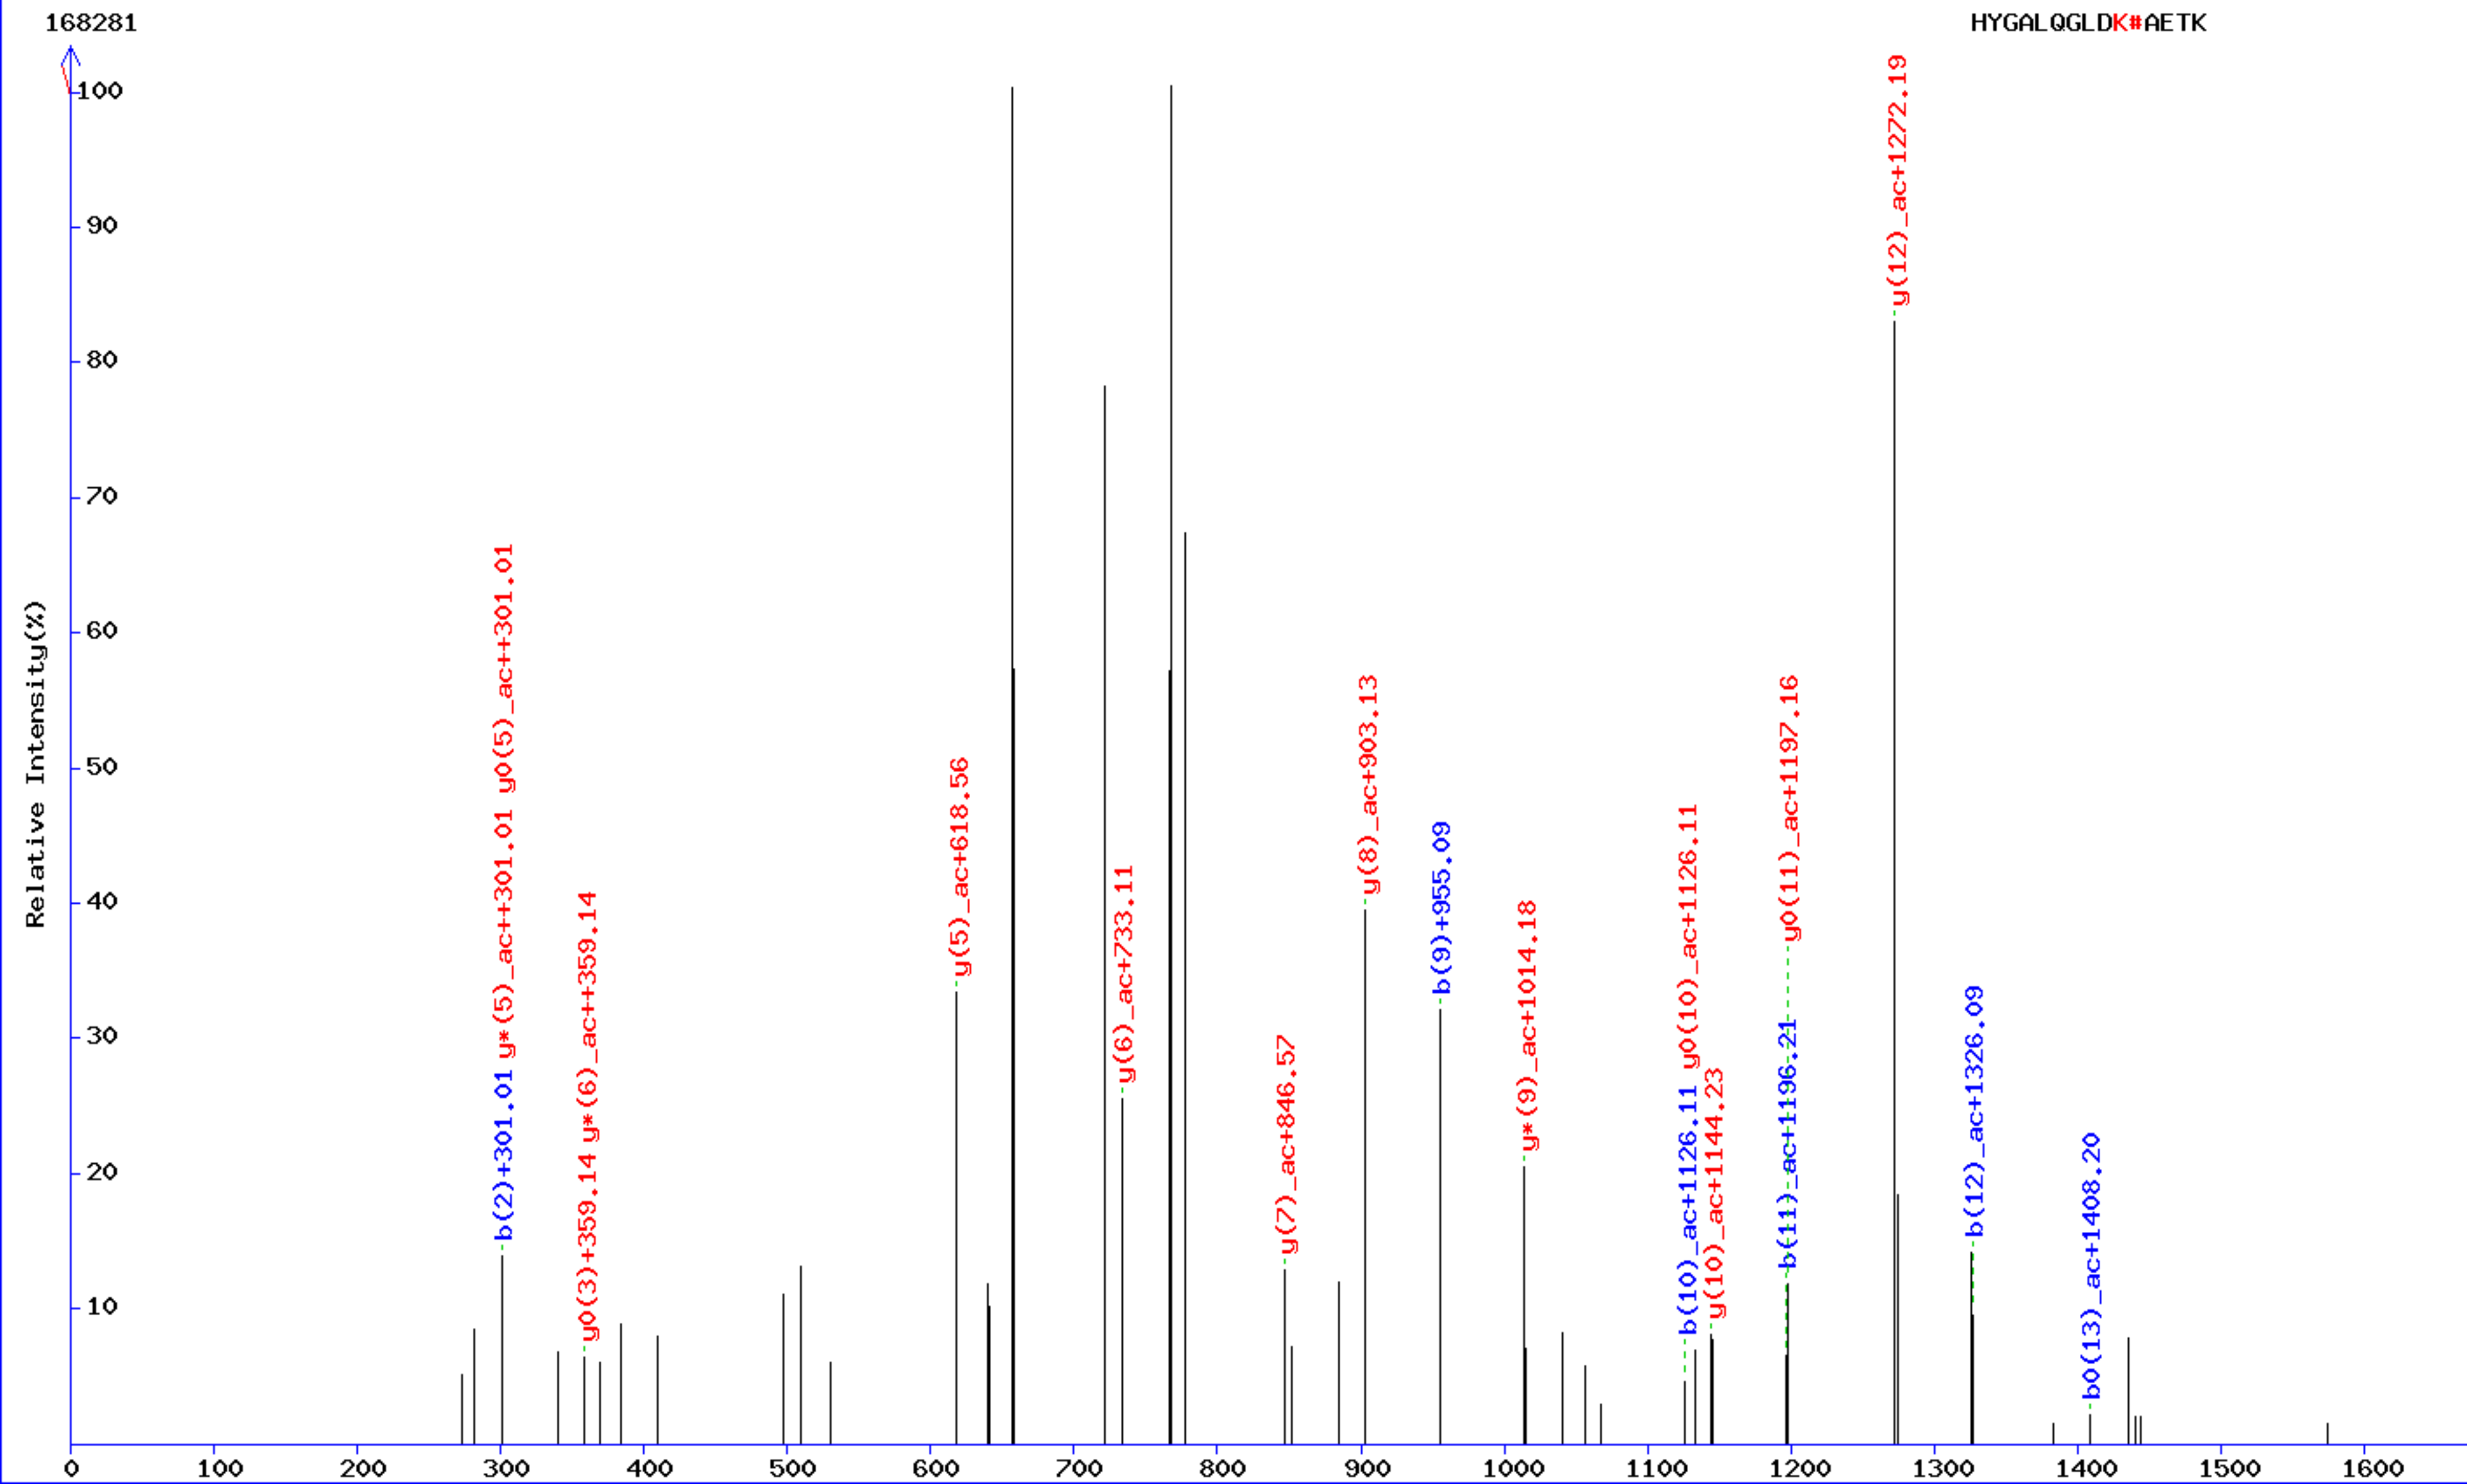

# gi|148660667 MRA\_0897 citrate synthase 2

GEK#LMGFGHR

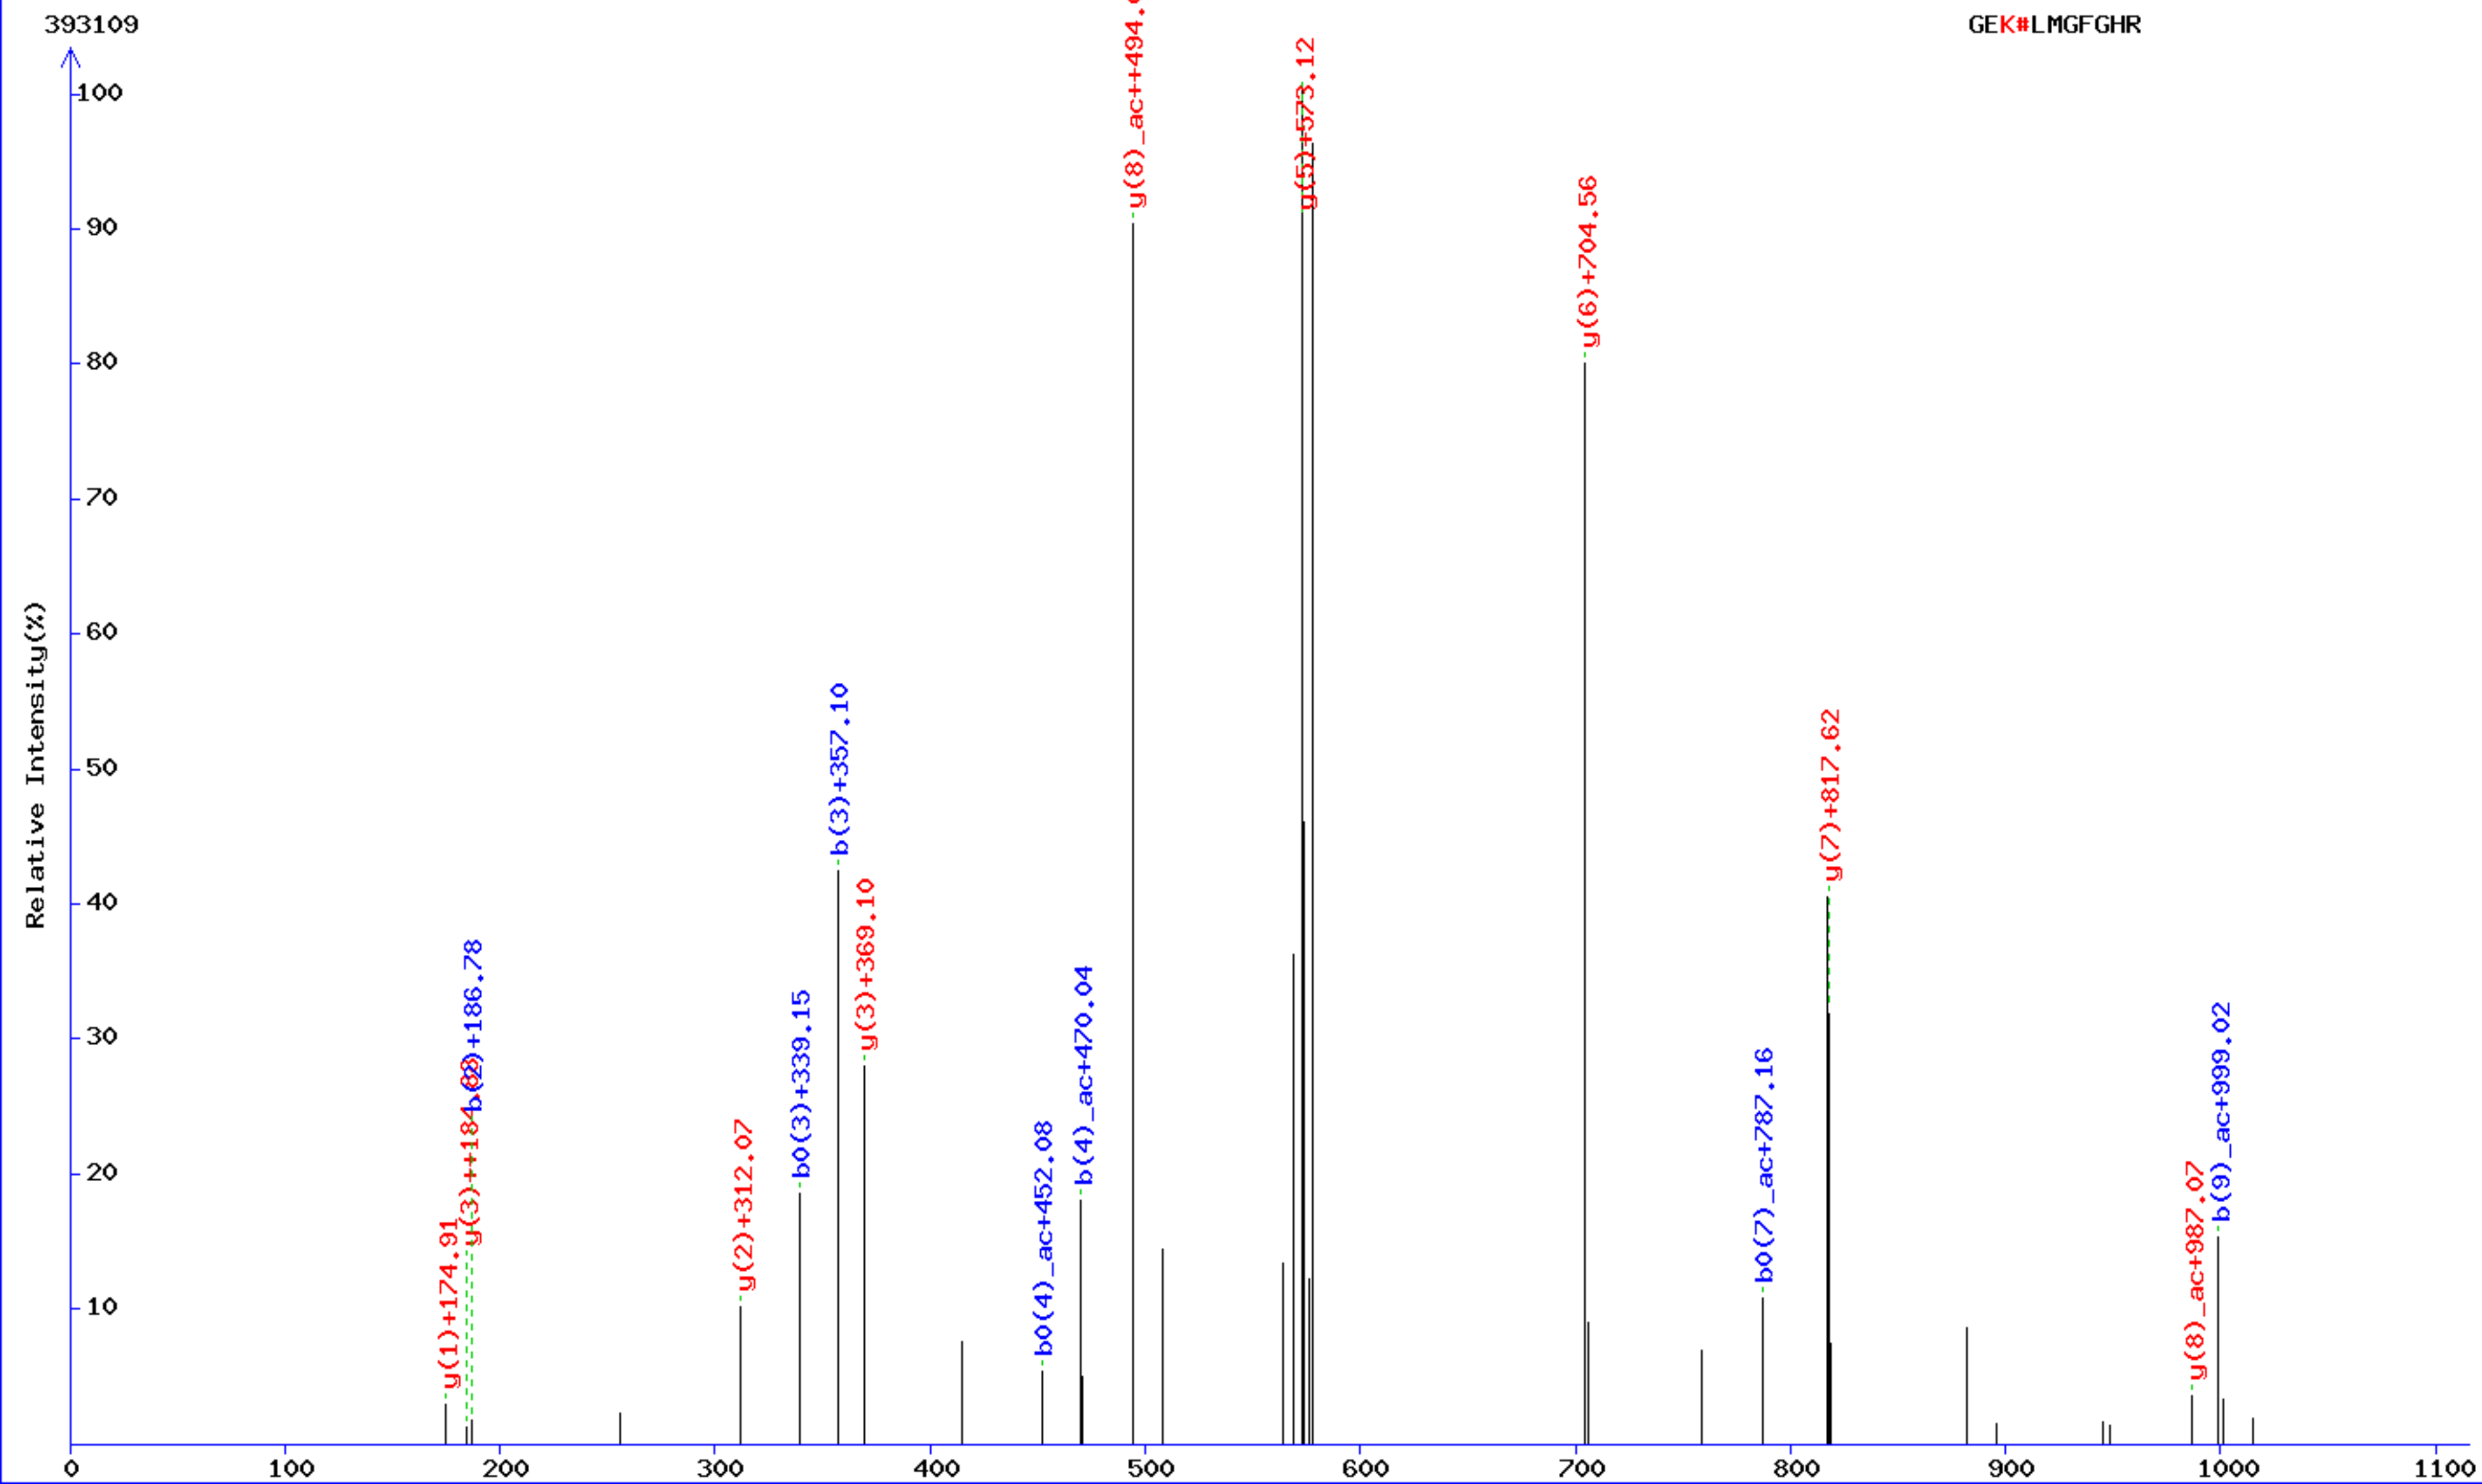

# gi|148662028 MRA\_2227 glycine cleavage system aminomethyltransferase T

AALLAEK#AAGPR

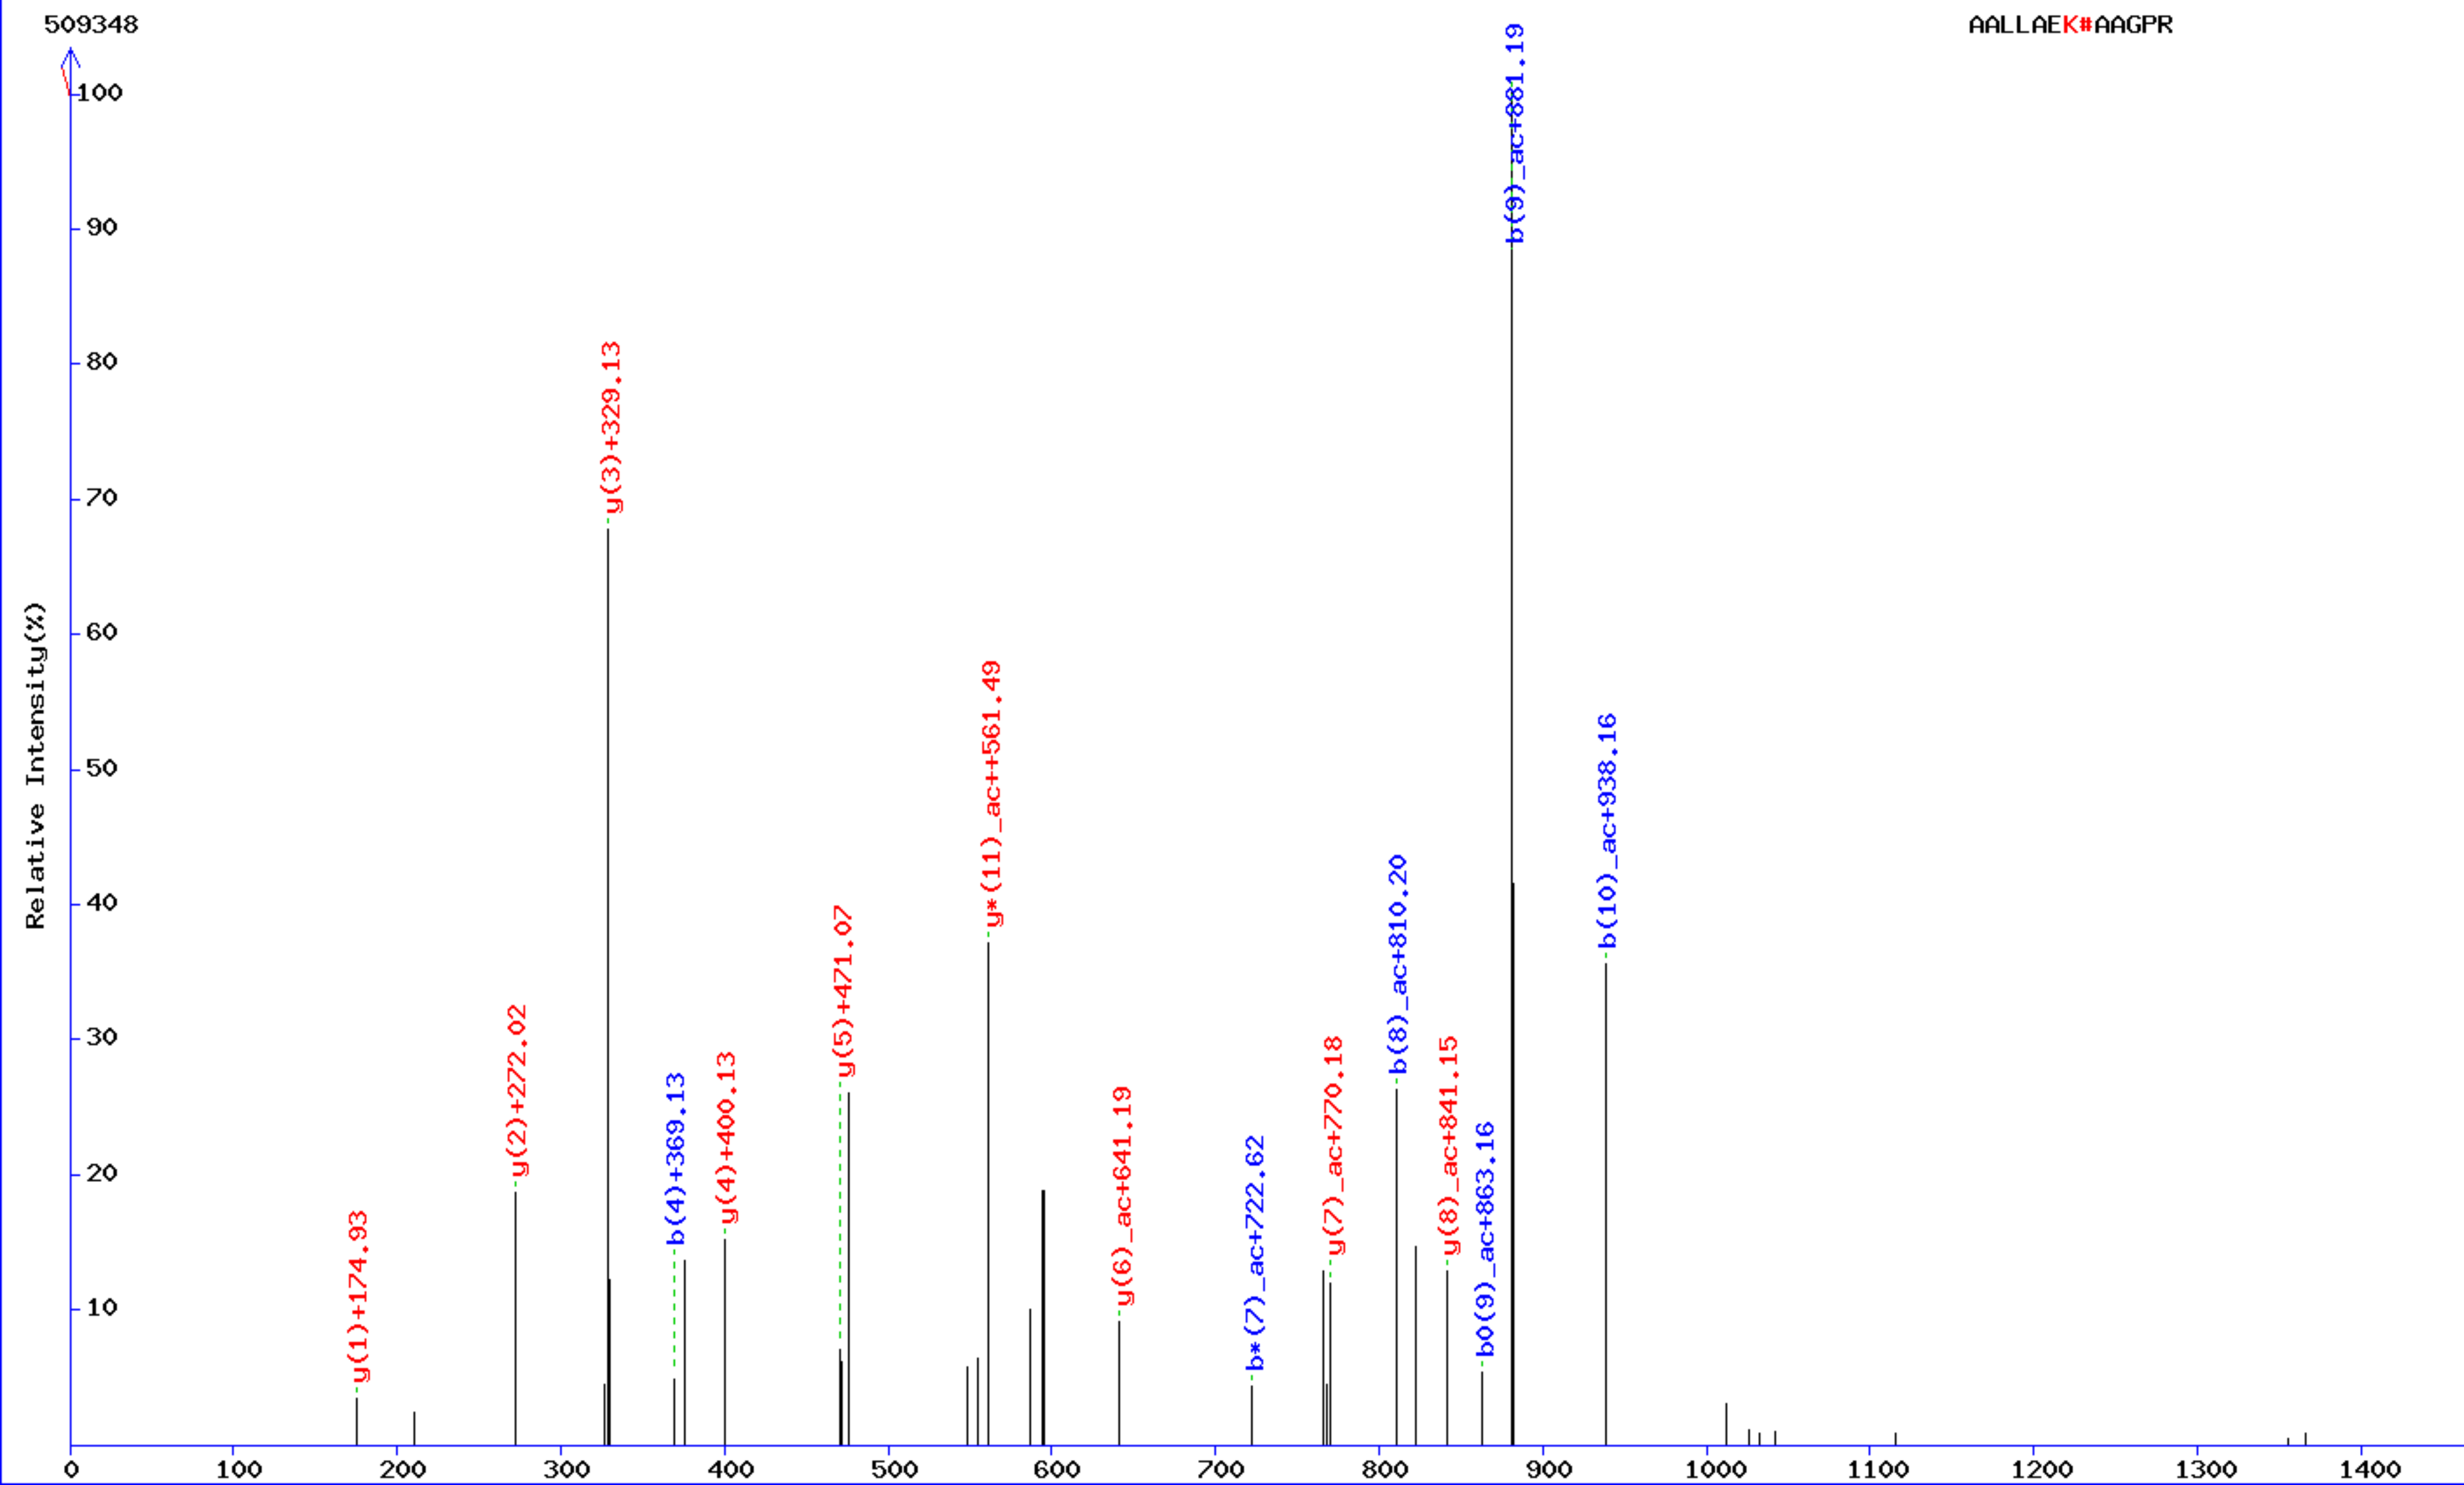

# gi|148660908 MRA\_1131 6-phosphogluconate dehydrogenase

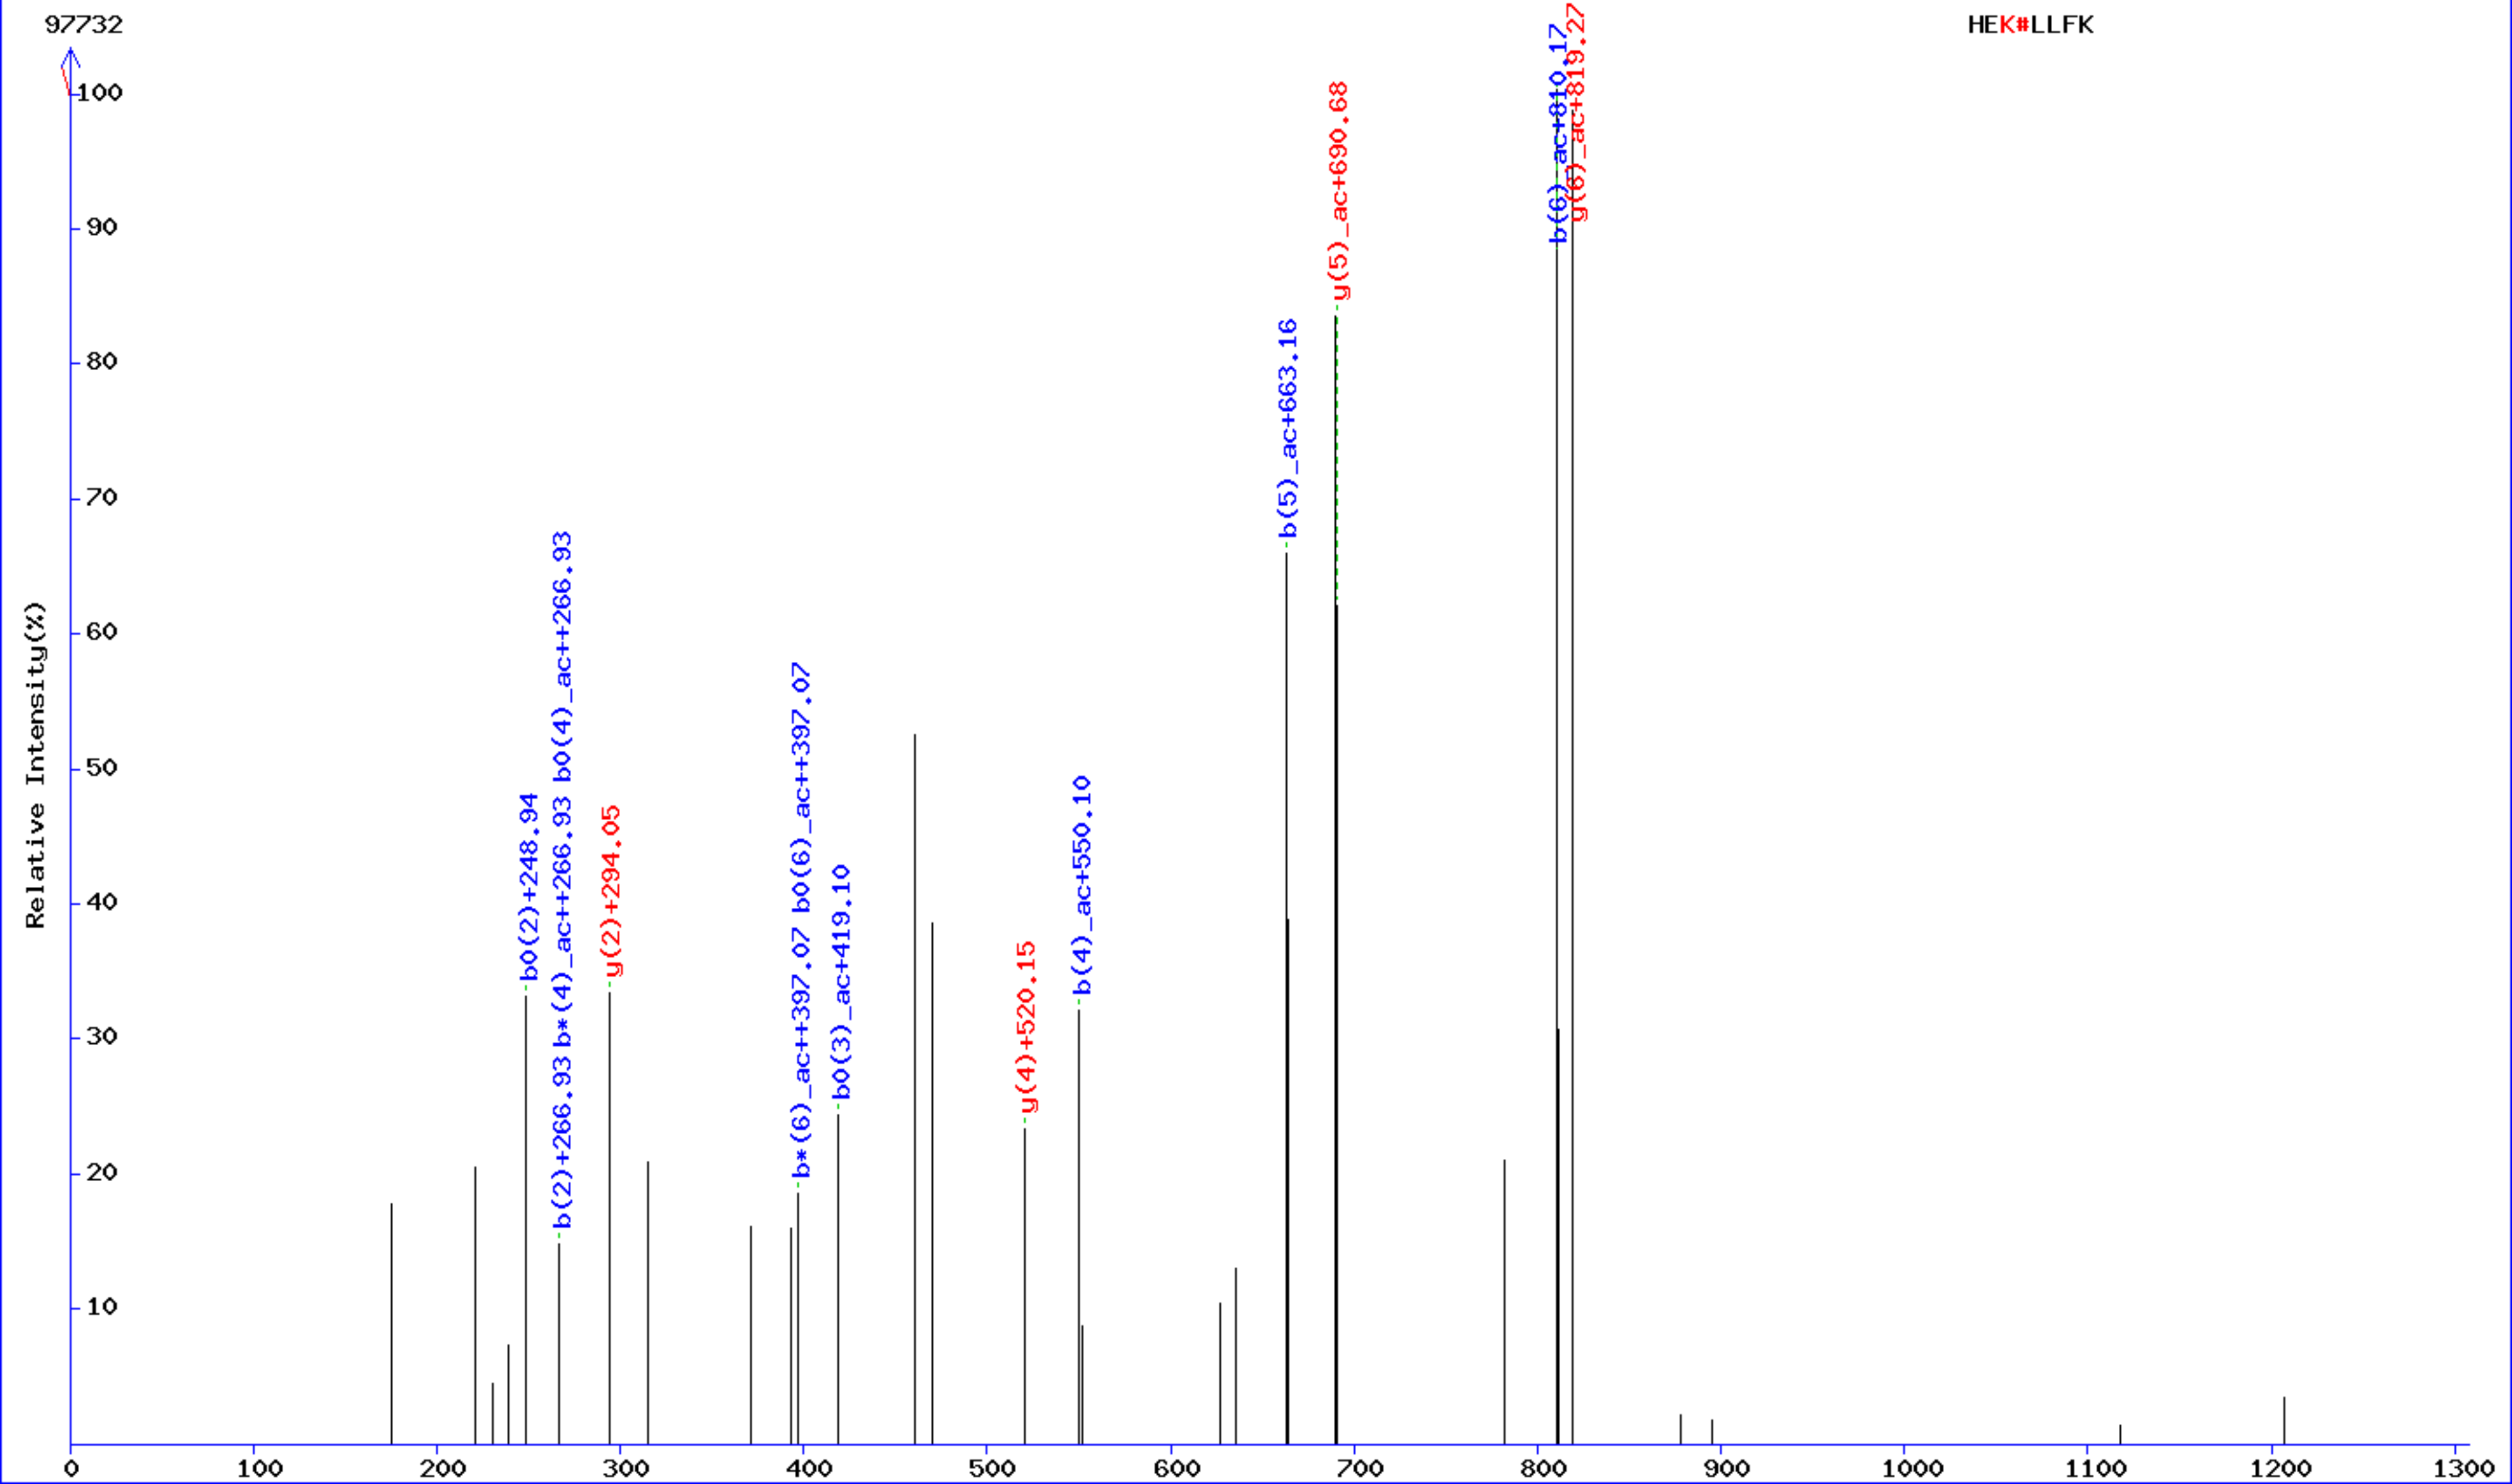

# gi|148663433 MRA\_3608 2-hydroxy-6-phenylhexa-2,4-dienoic acid hydrolase

LSK#FSVAPTR

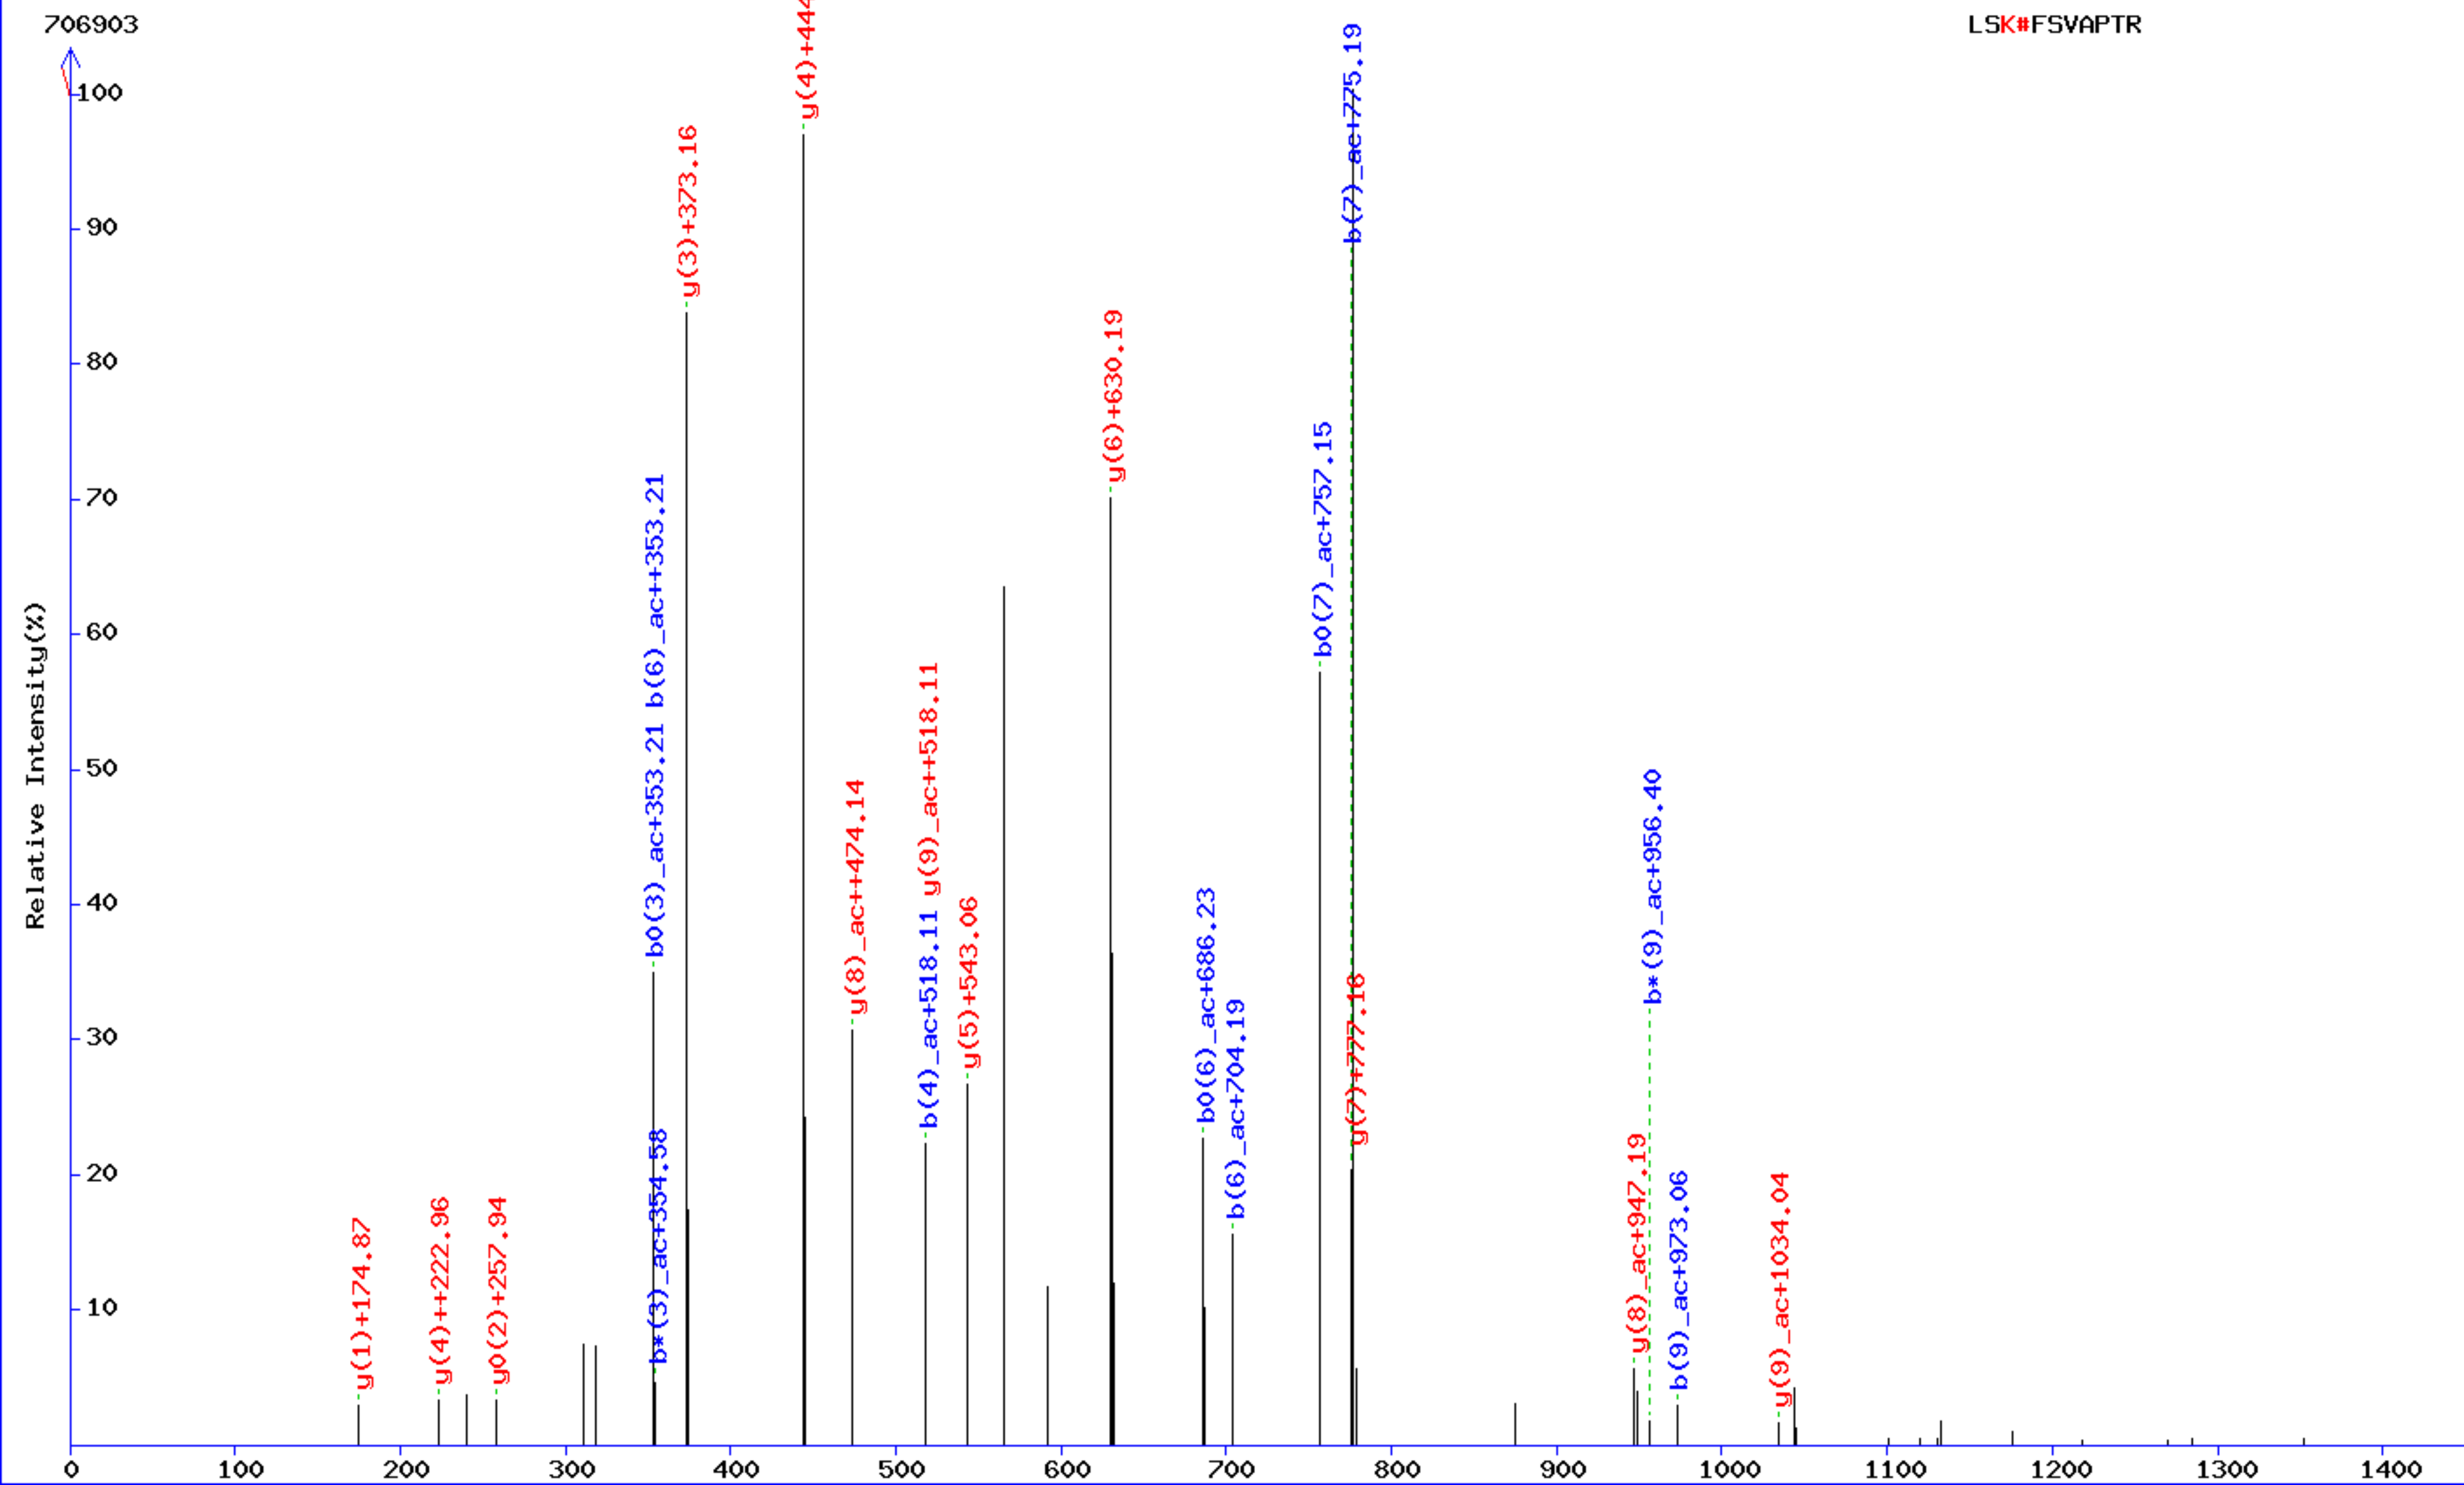



# gi|148661810 MRA\_2012 hypothetical protein

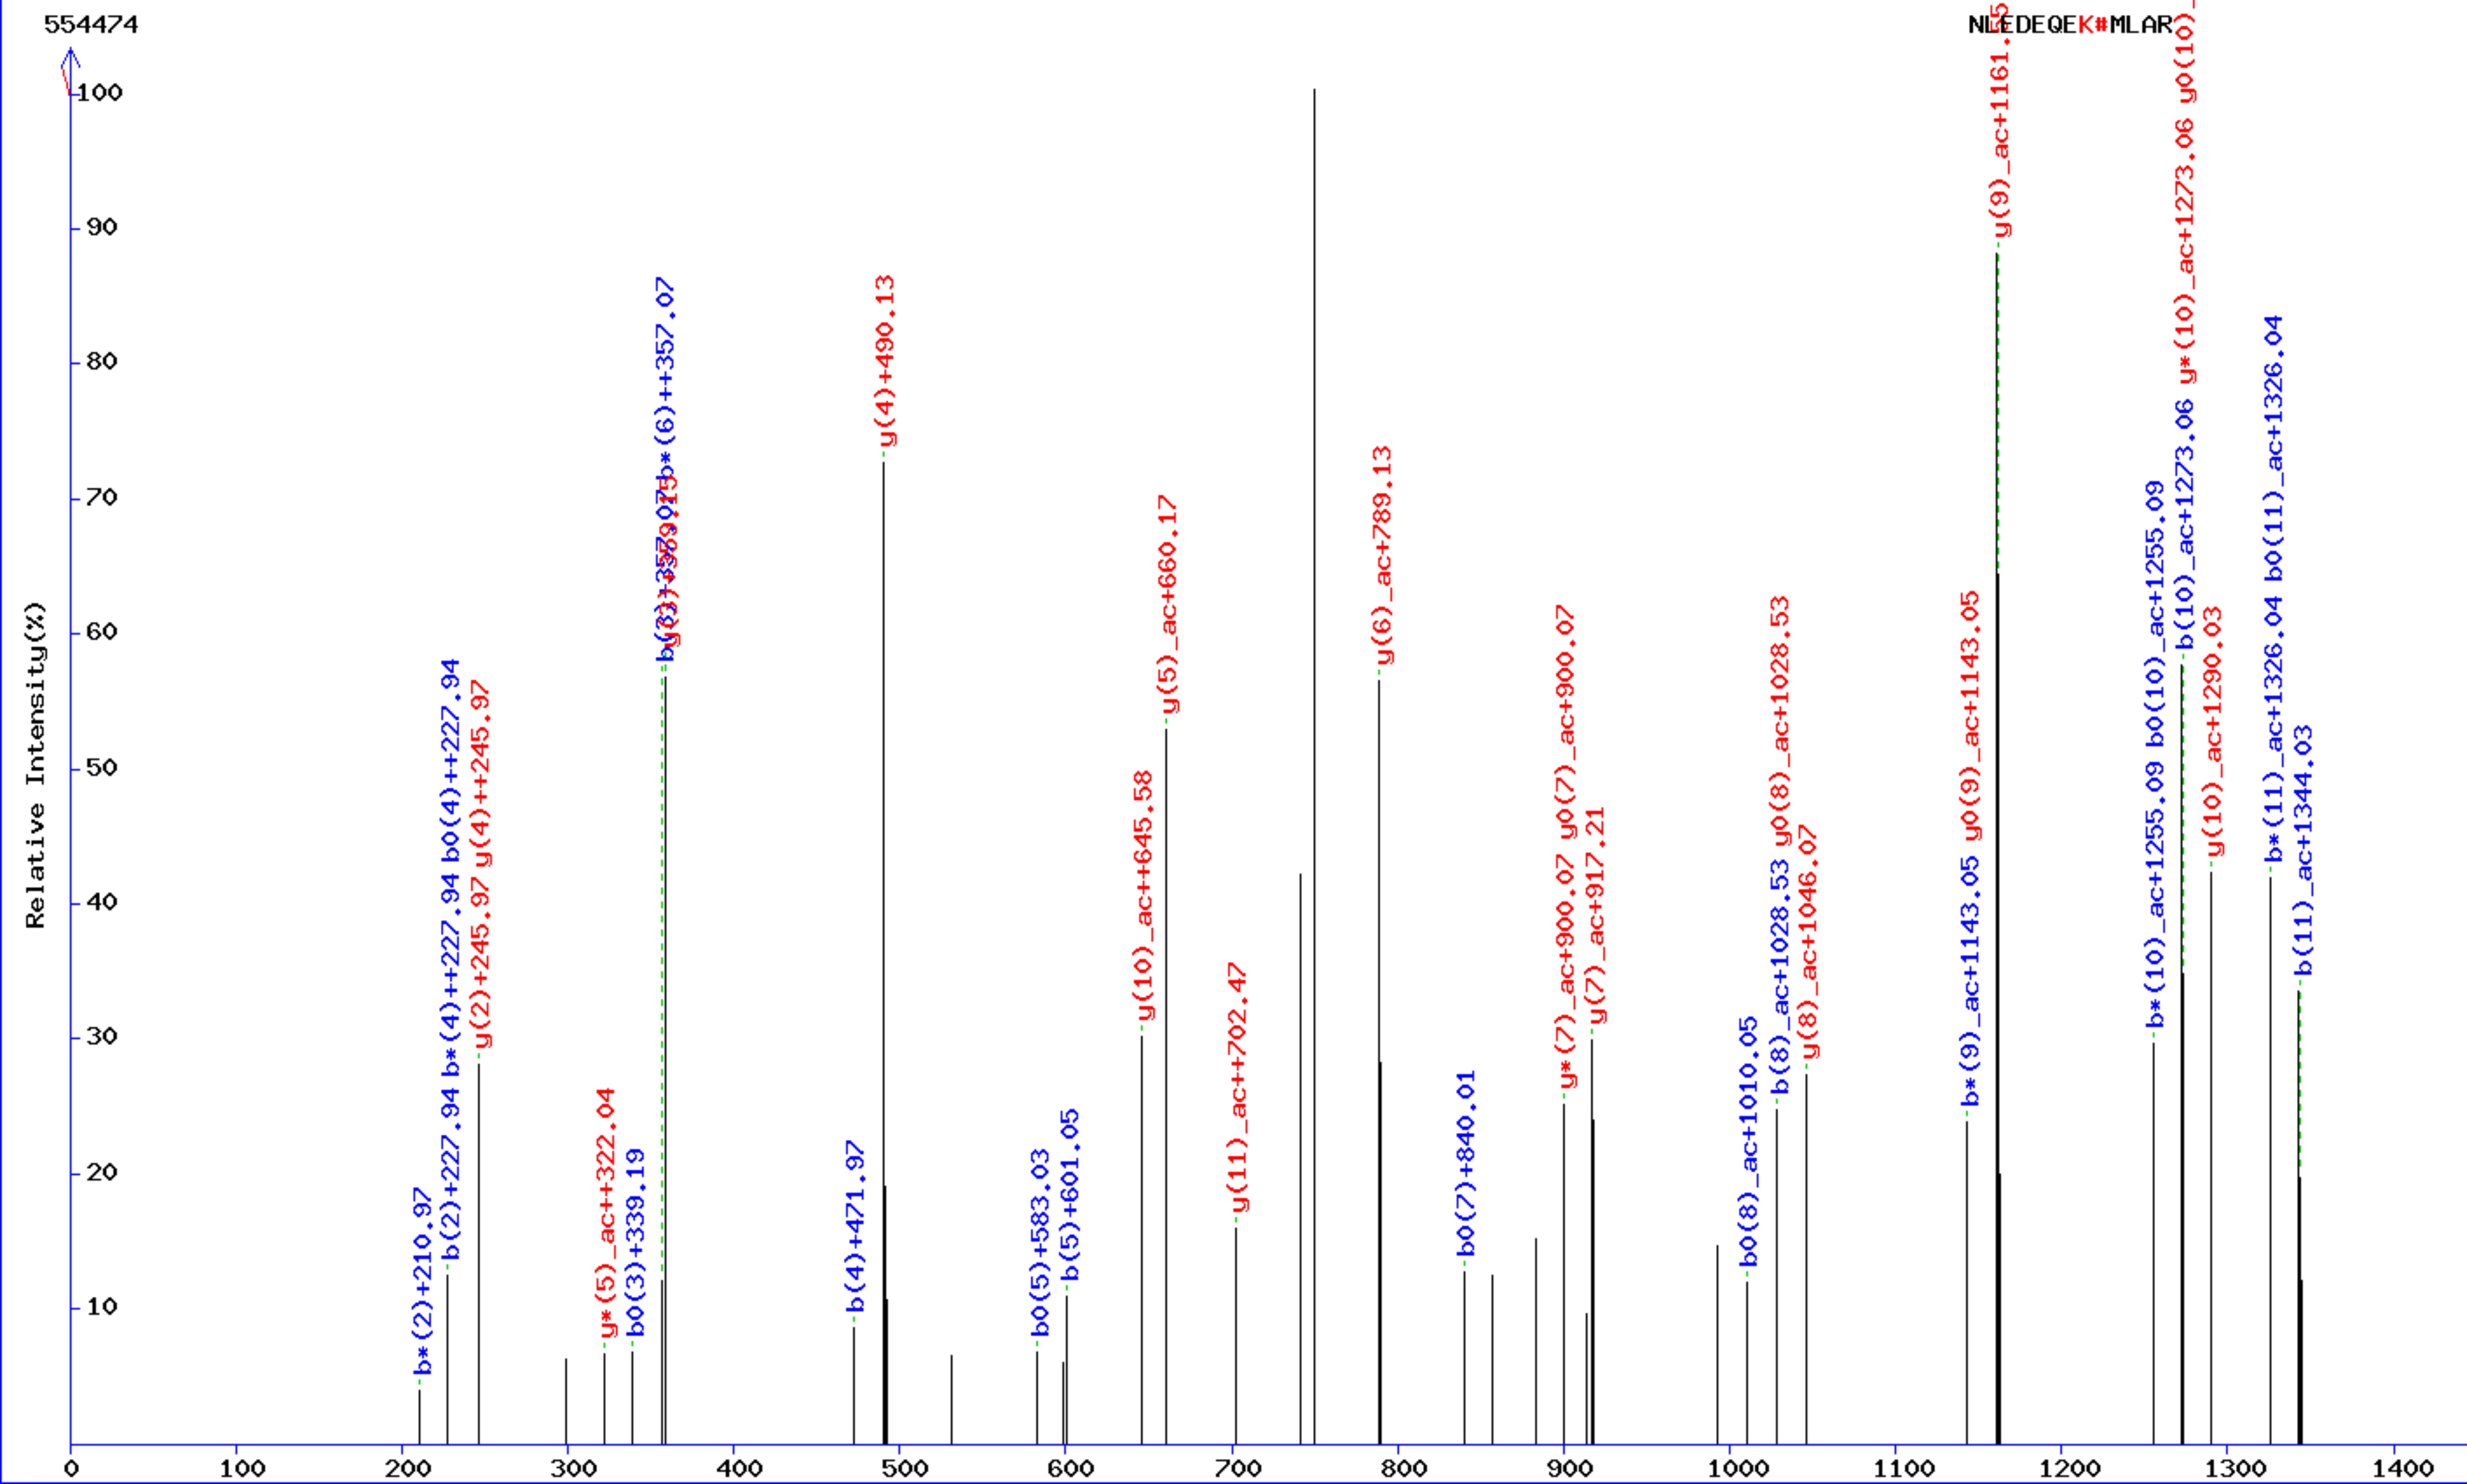

# gi|148662733 MRA\_2914 elongation factor Ts

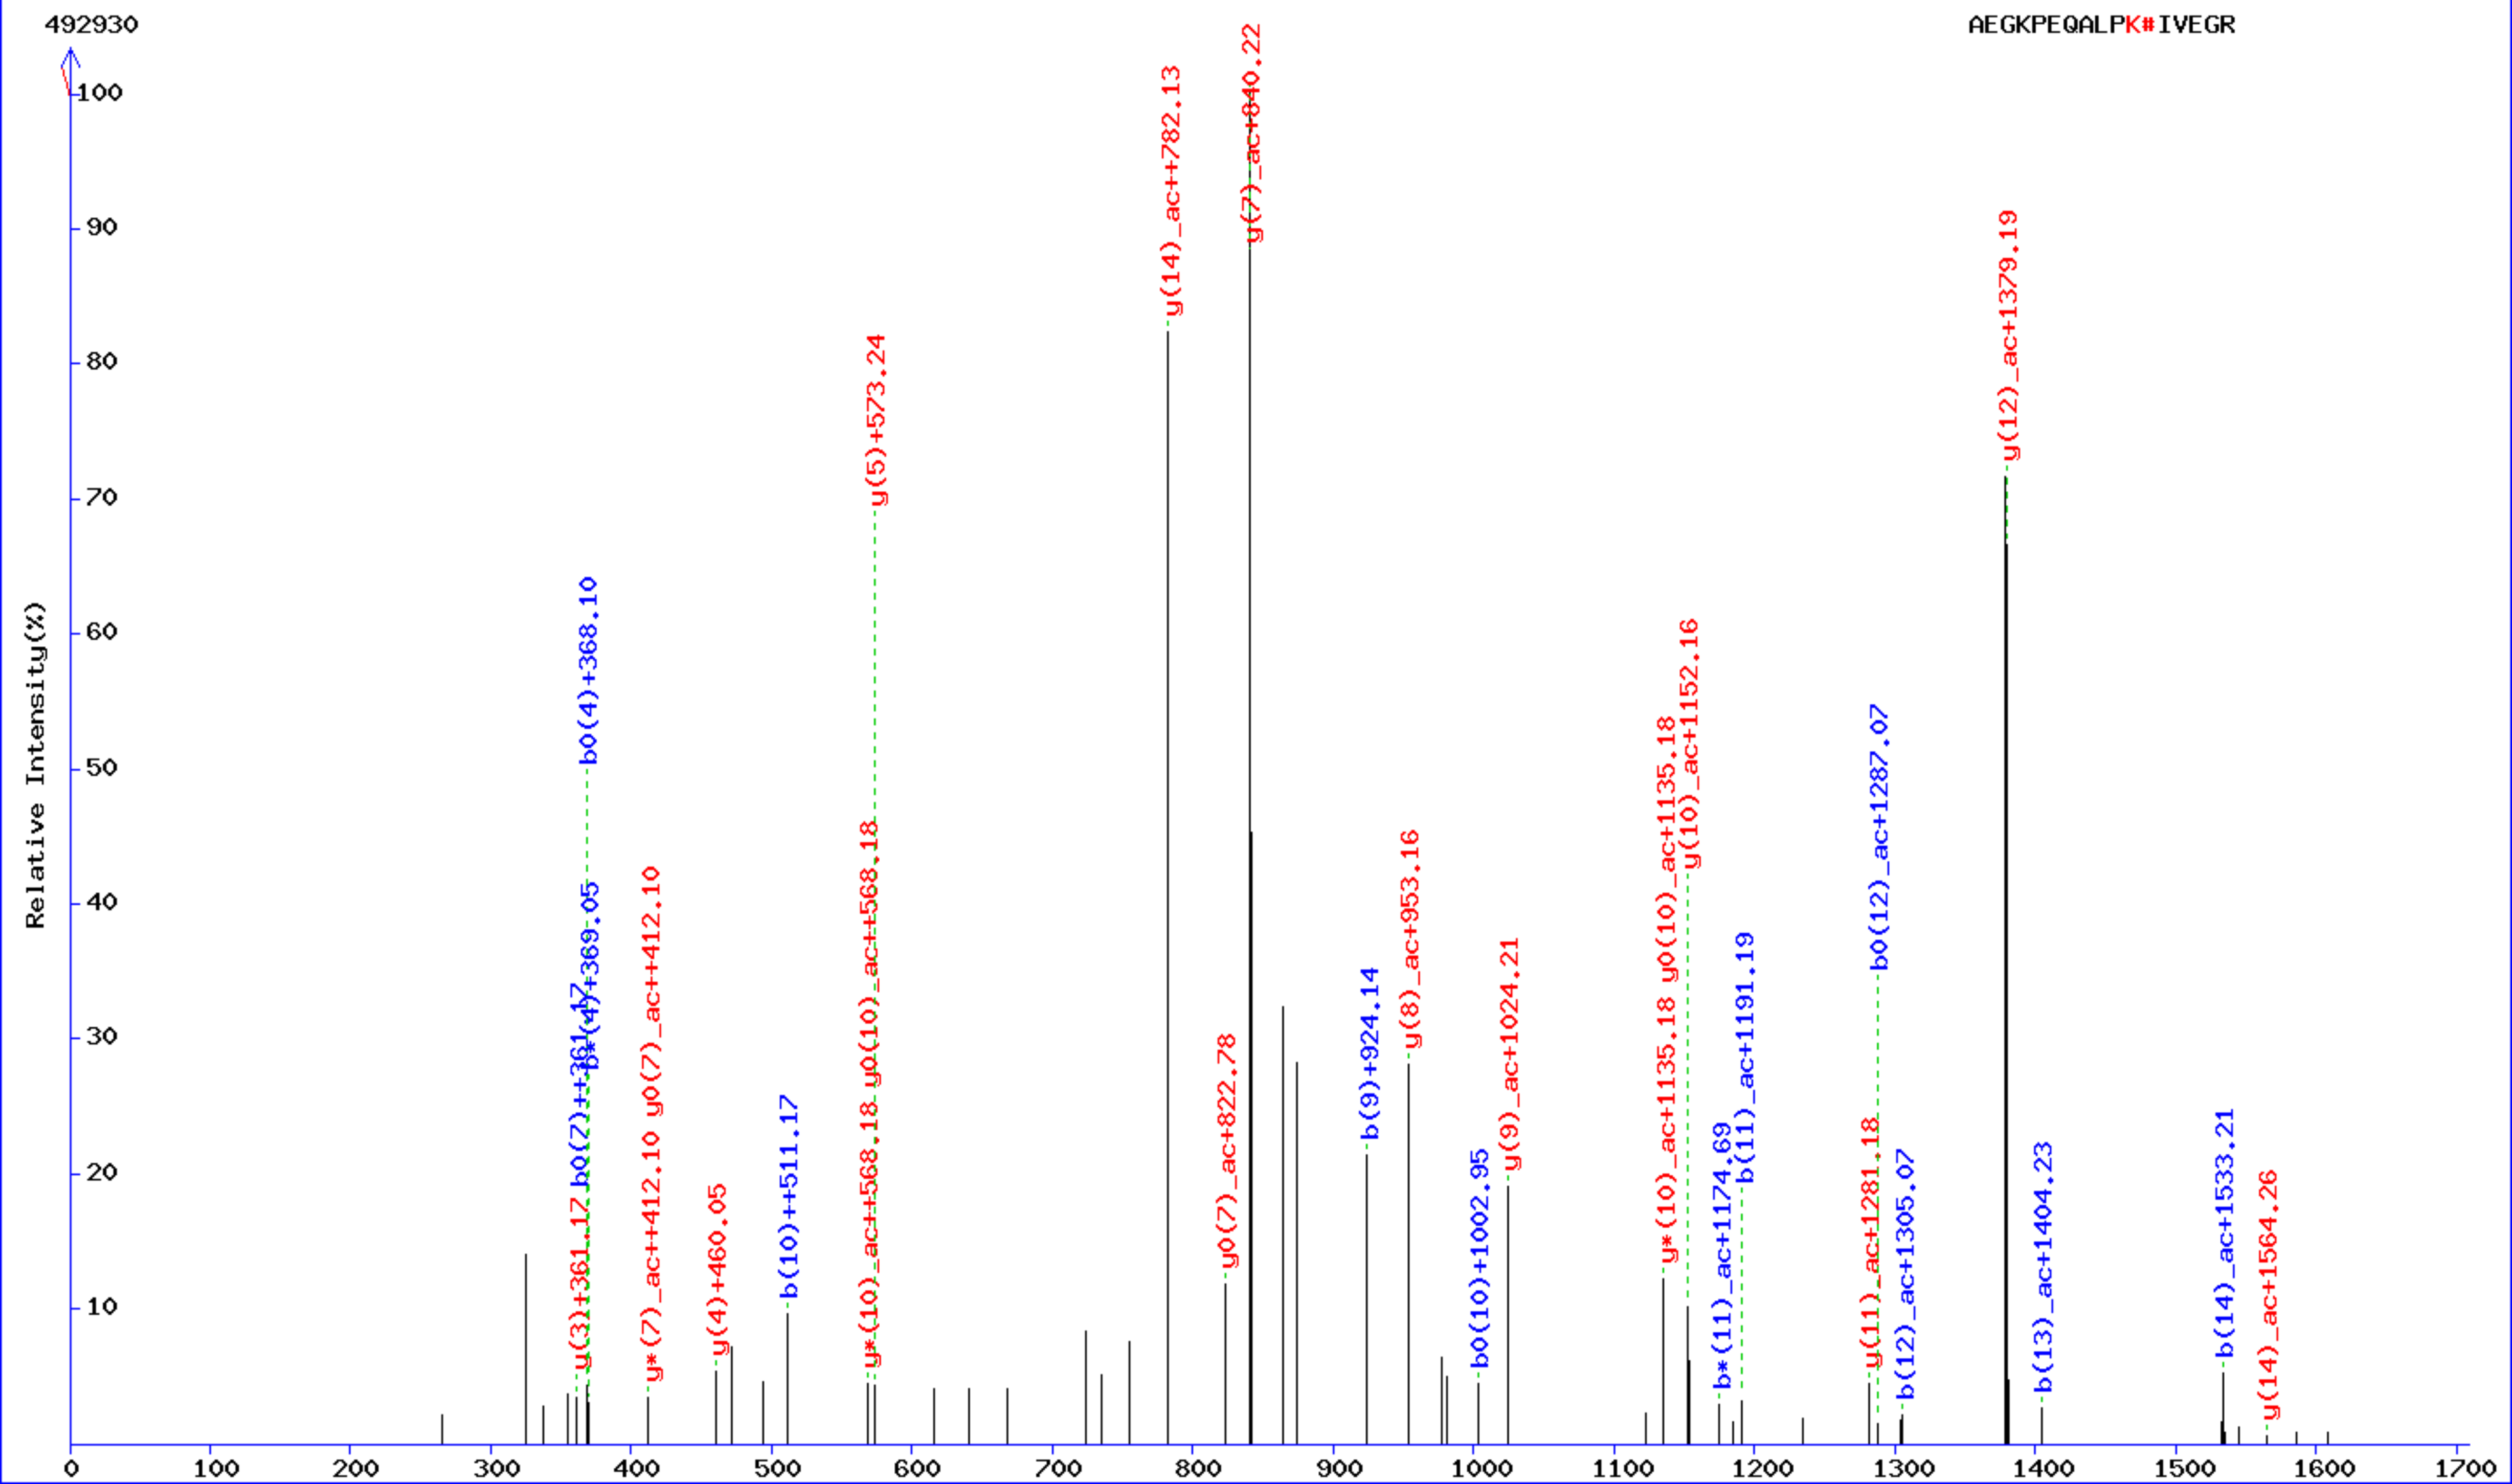

AEGKPEQALPK#IVEGR

# gi|148661281 MRA\_1497 hypothetical protein

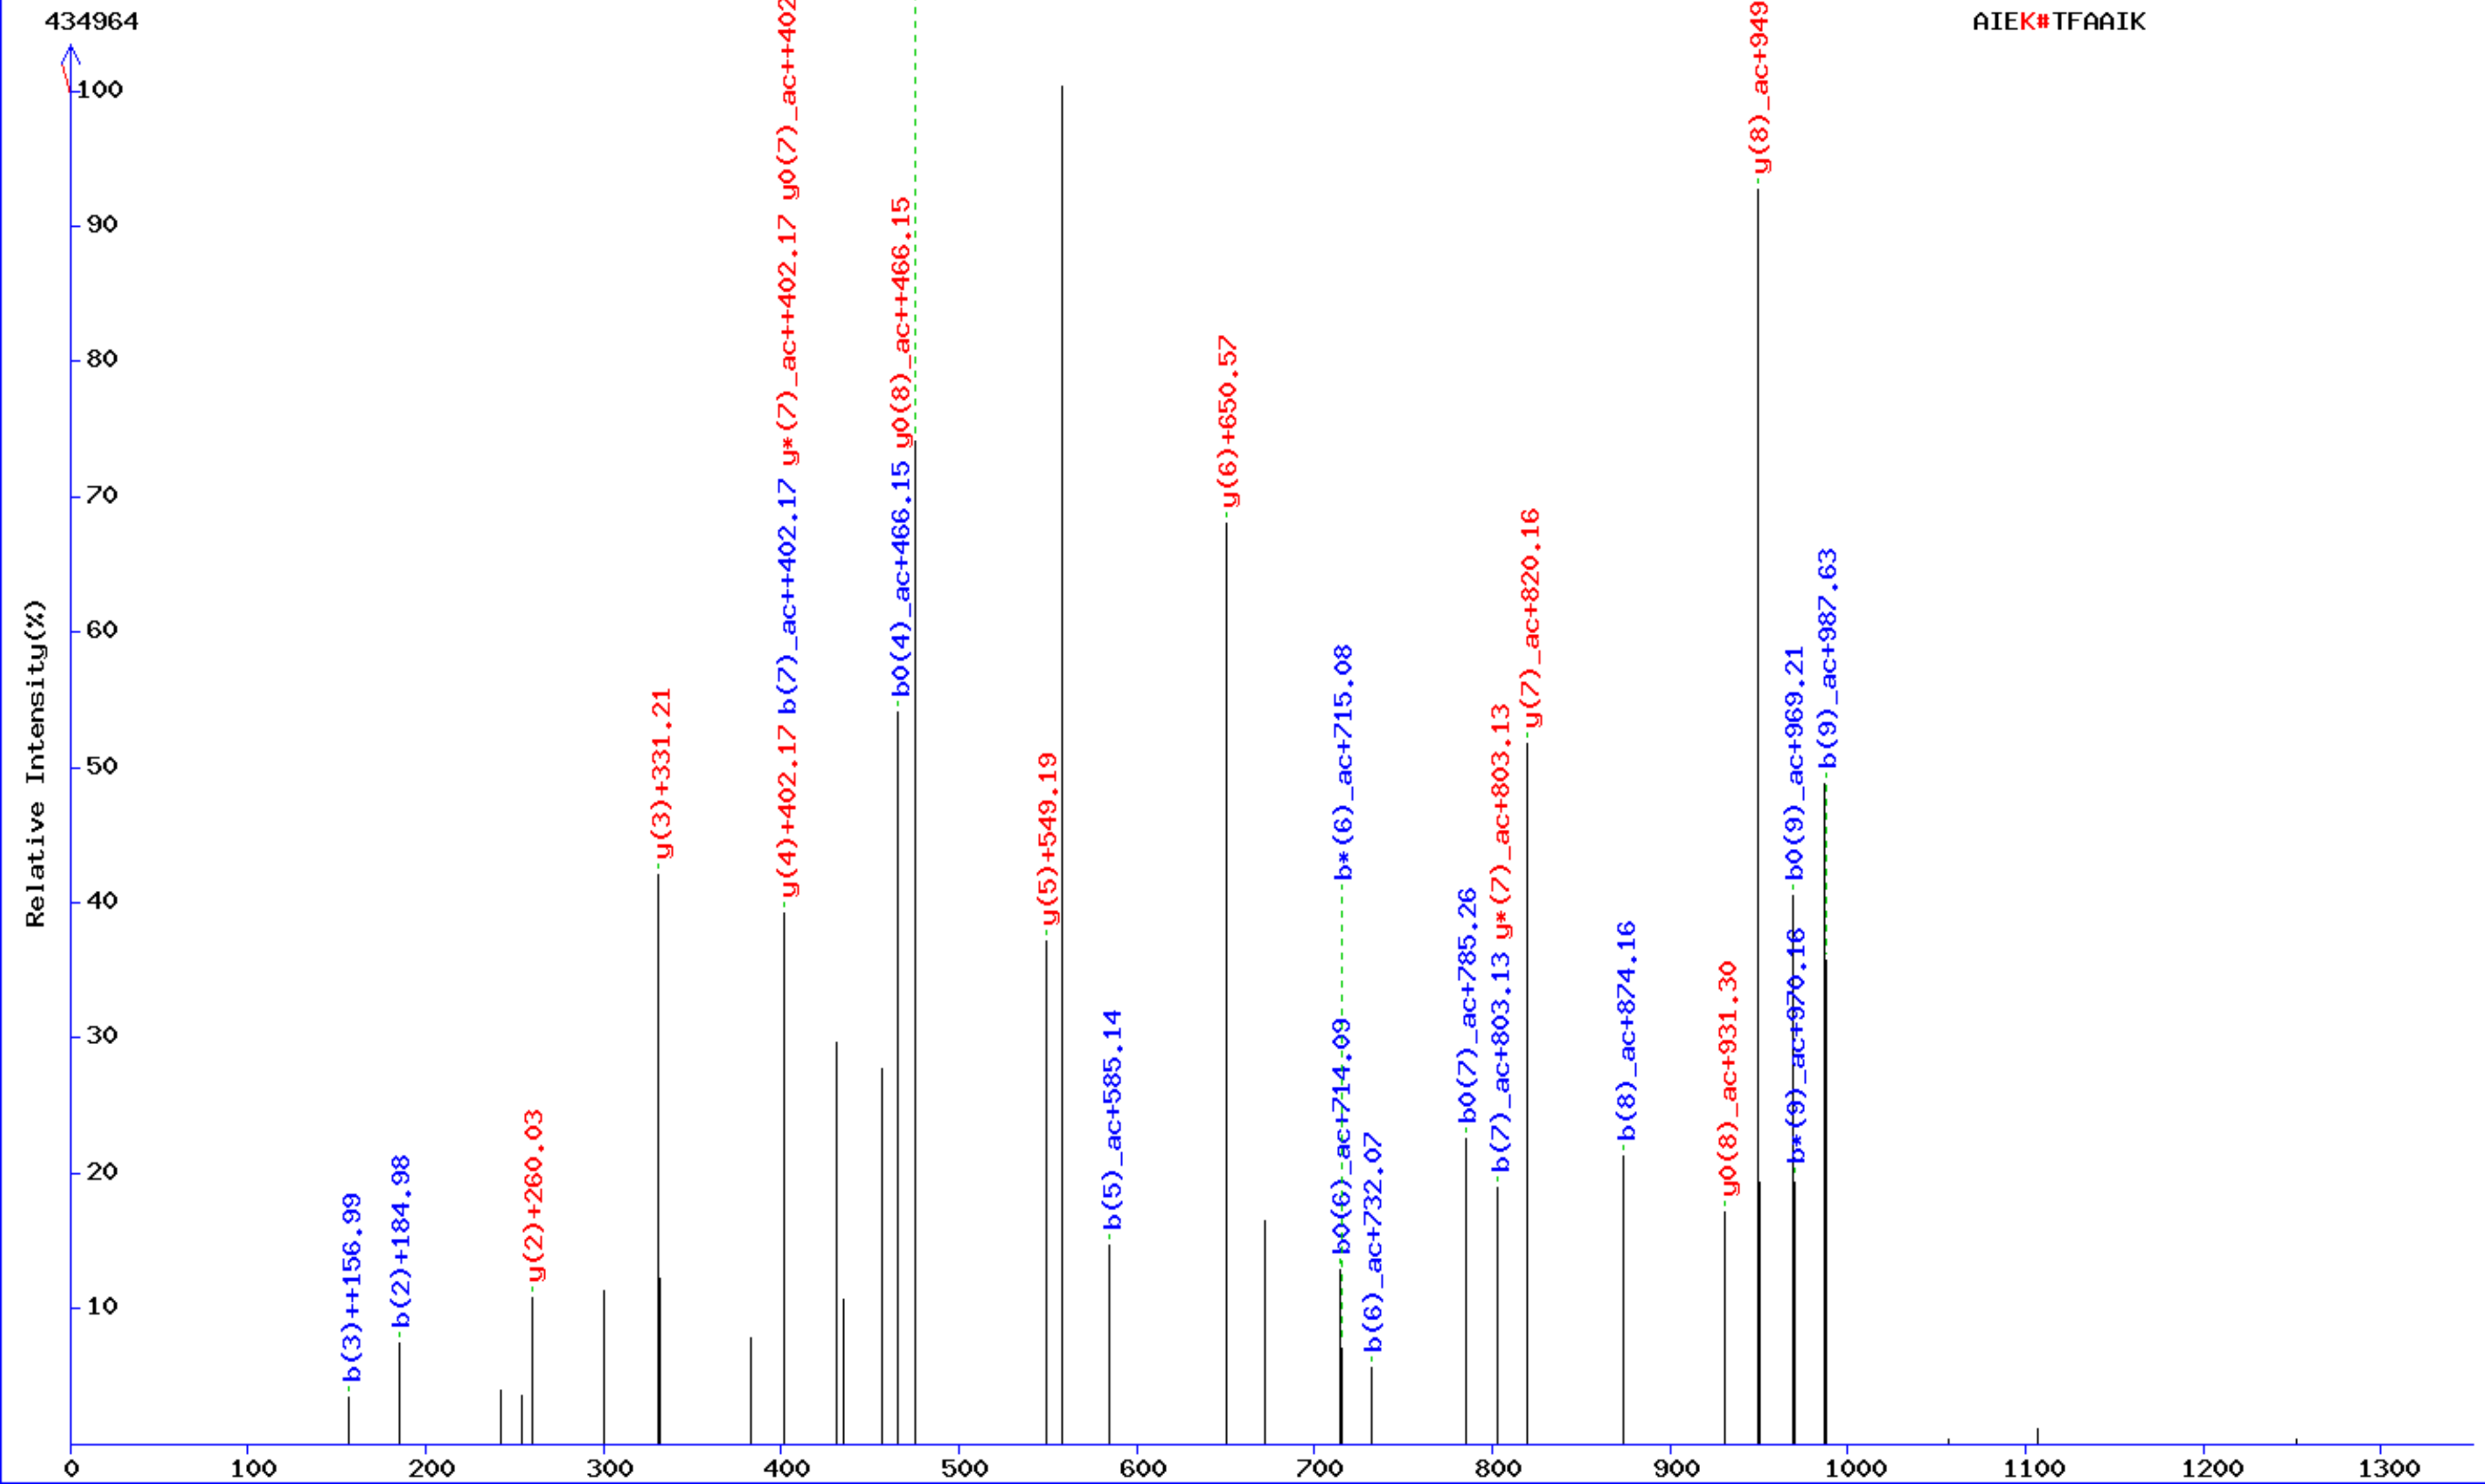

# gi|148663086 MRA\_3264 short chain dehydrogenase

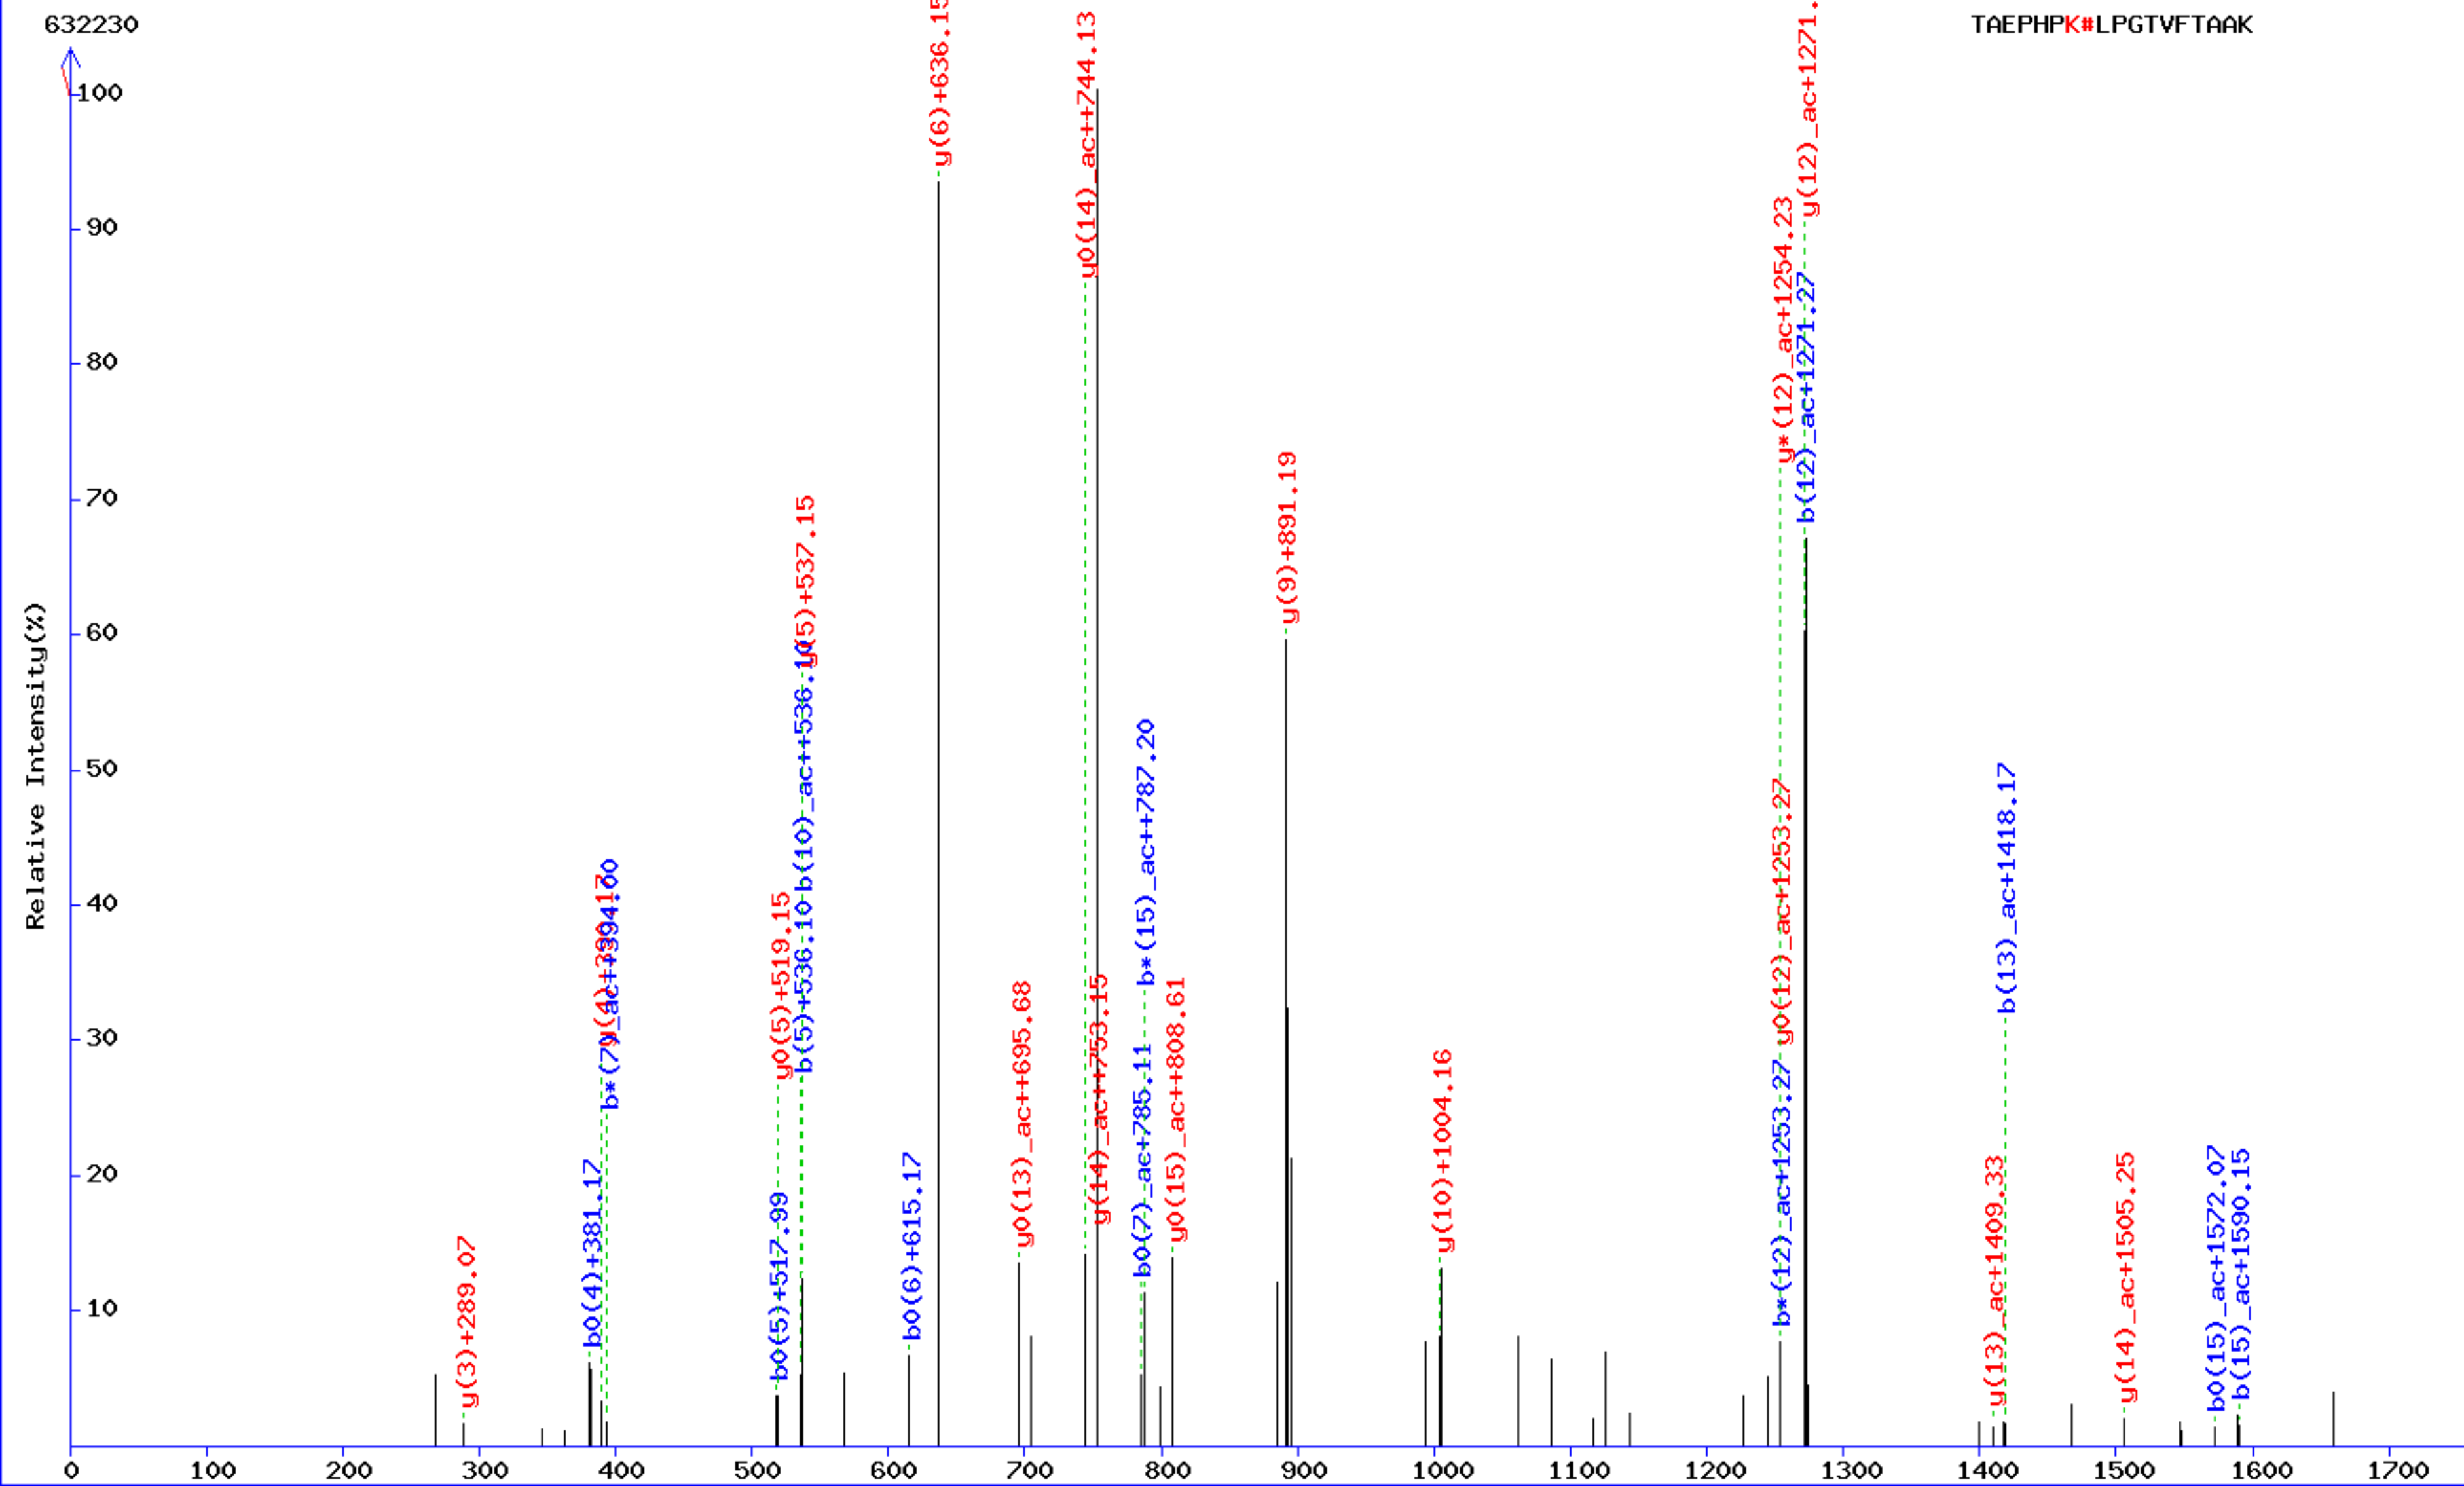

TAEPHPK#LPGTVFTAAK

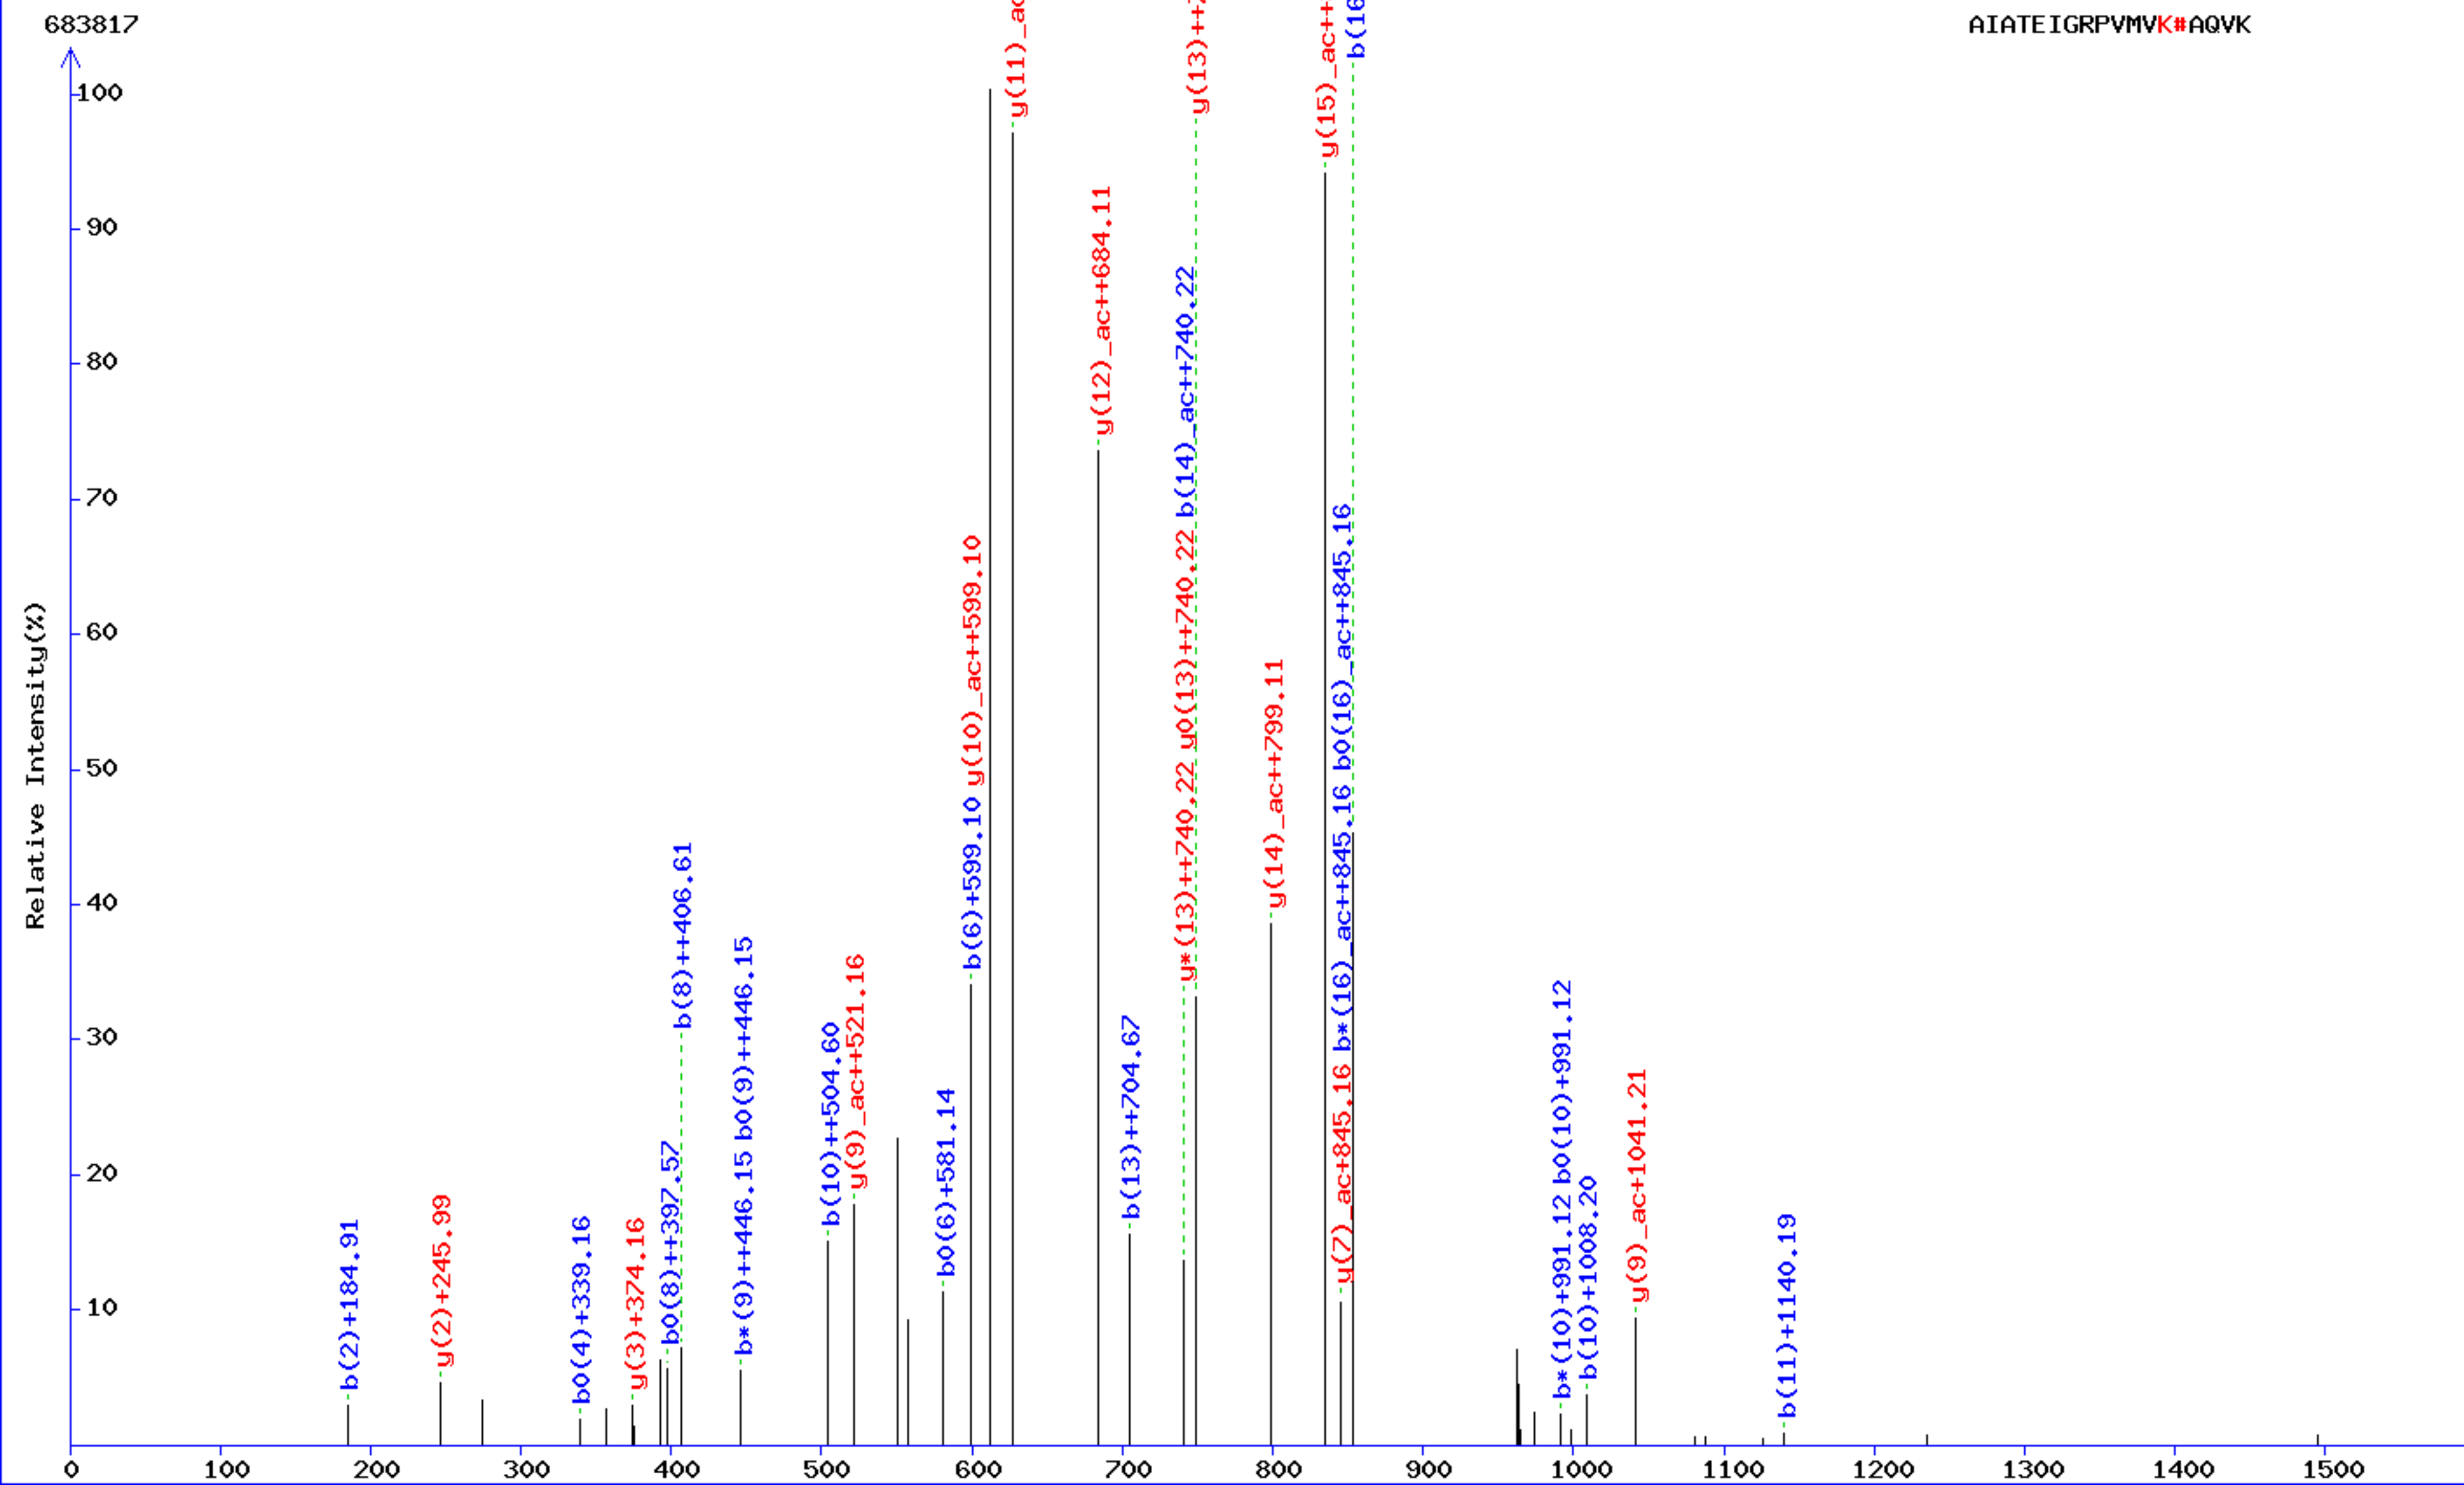

# gi|148660988 MRA\_1210 tetrahydrodipicolinate N-succinyltransferase

RGPVTVYGVDK#FPR

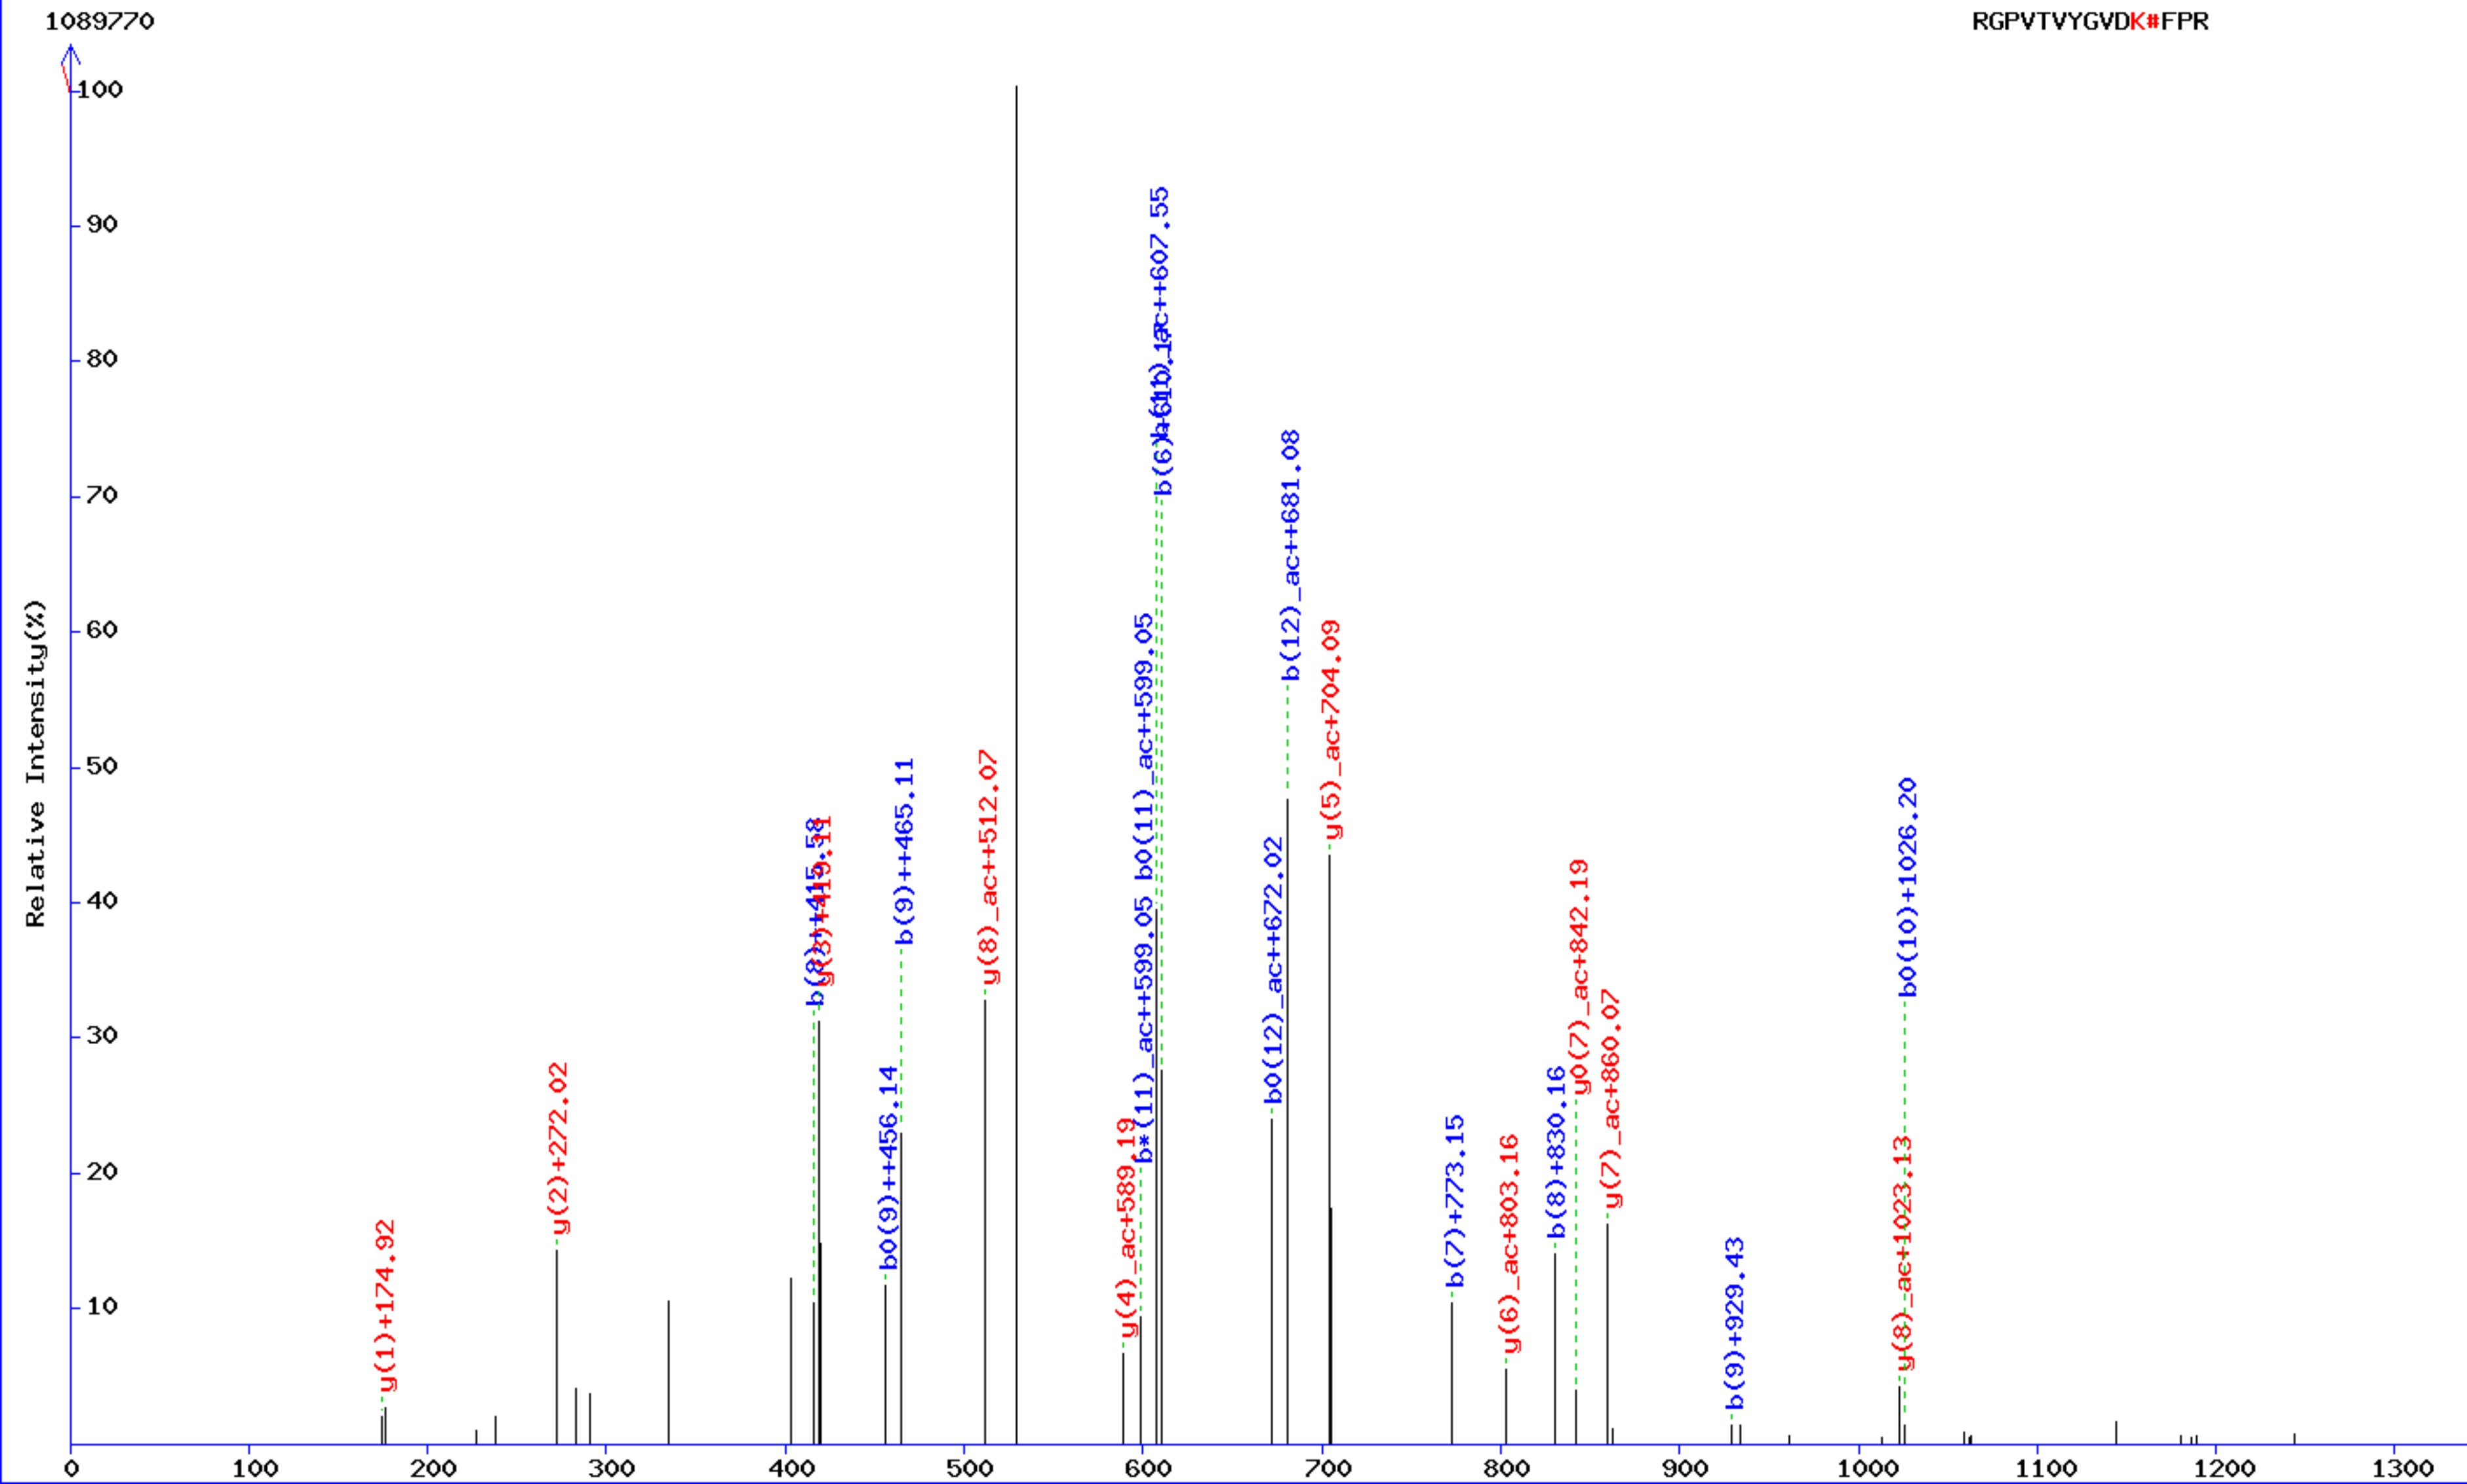

# gi|148660460 MRA\_0694 elongation factor Tu

VSALK#ALEGDAK

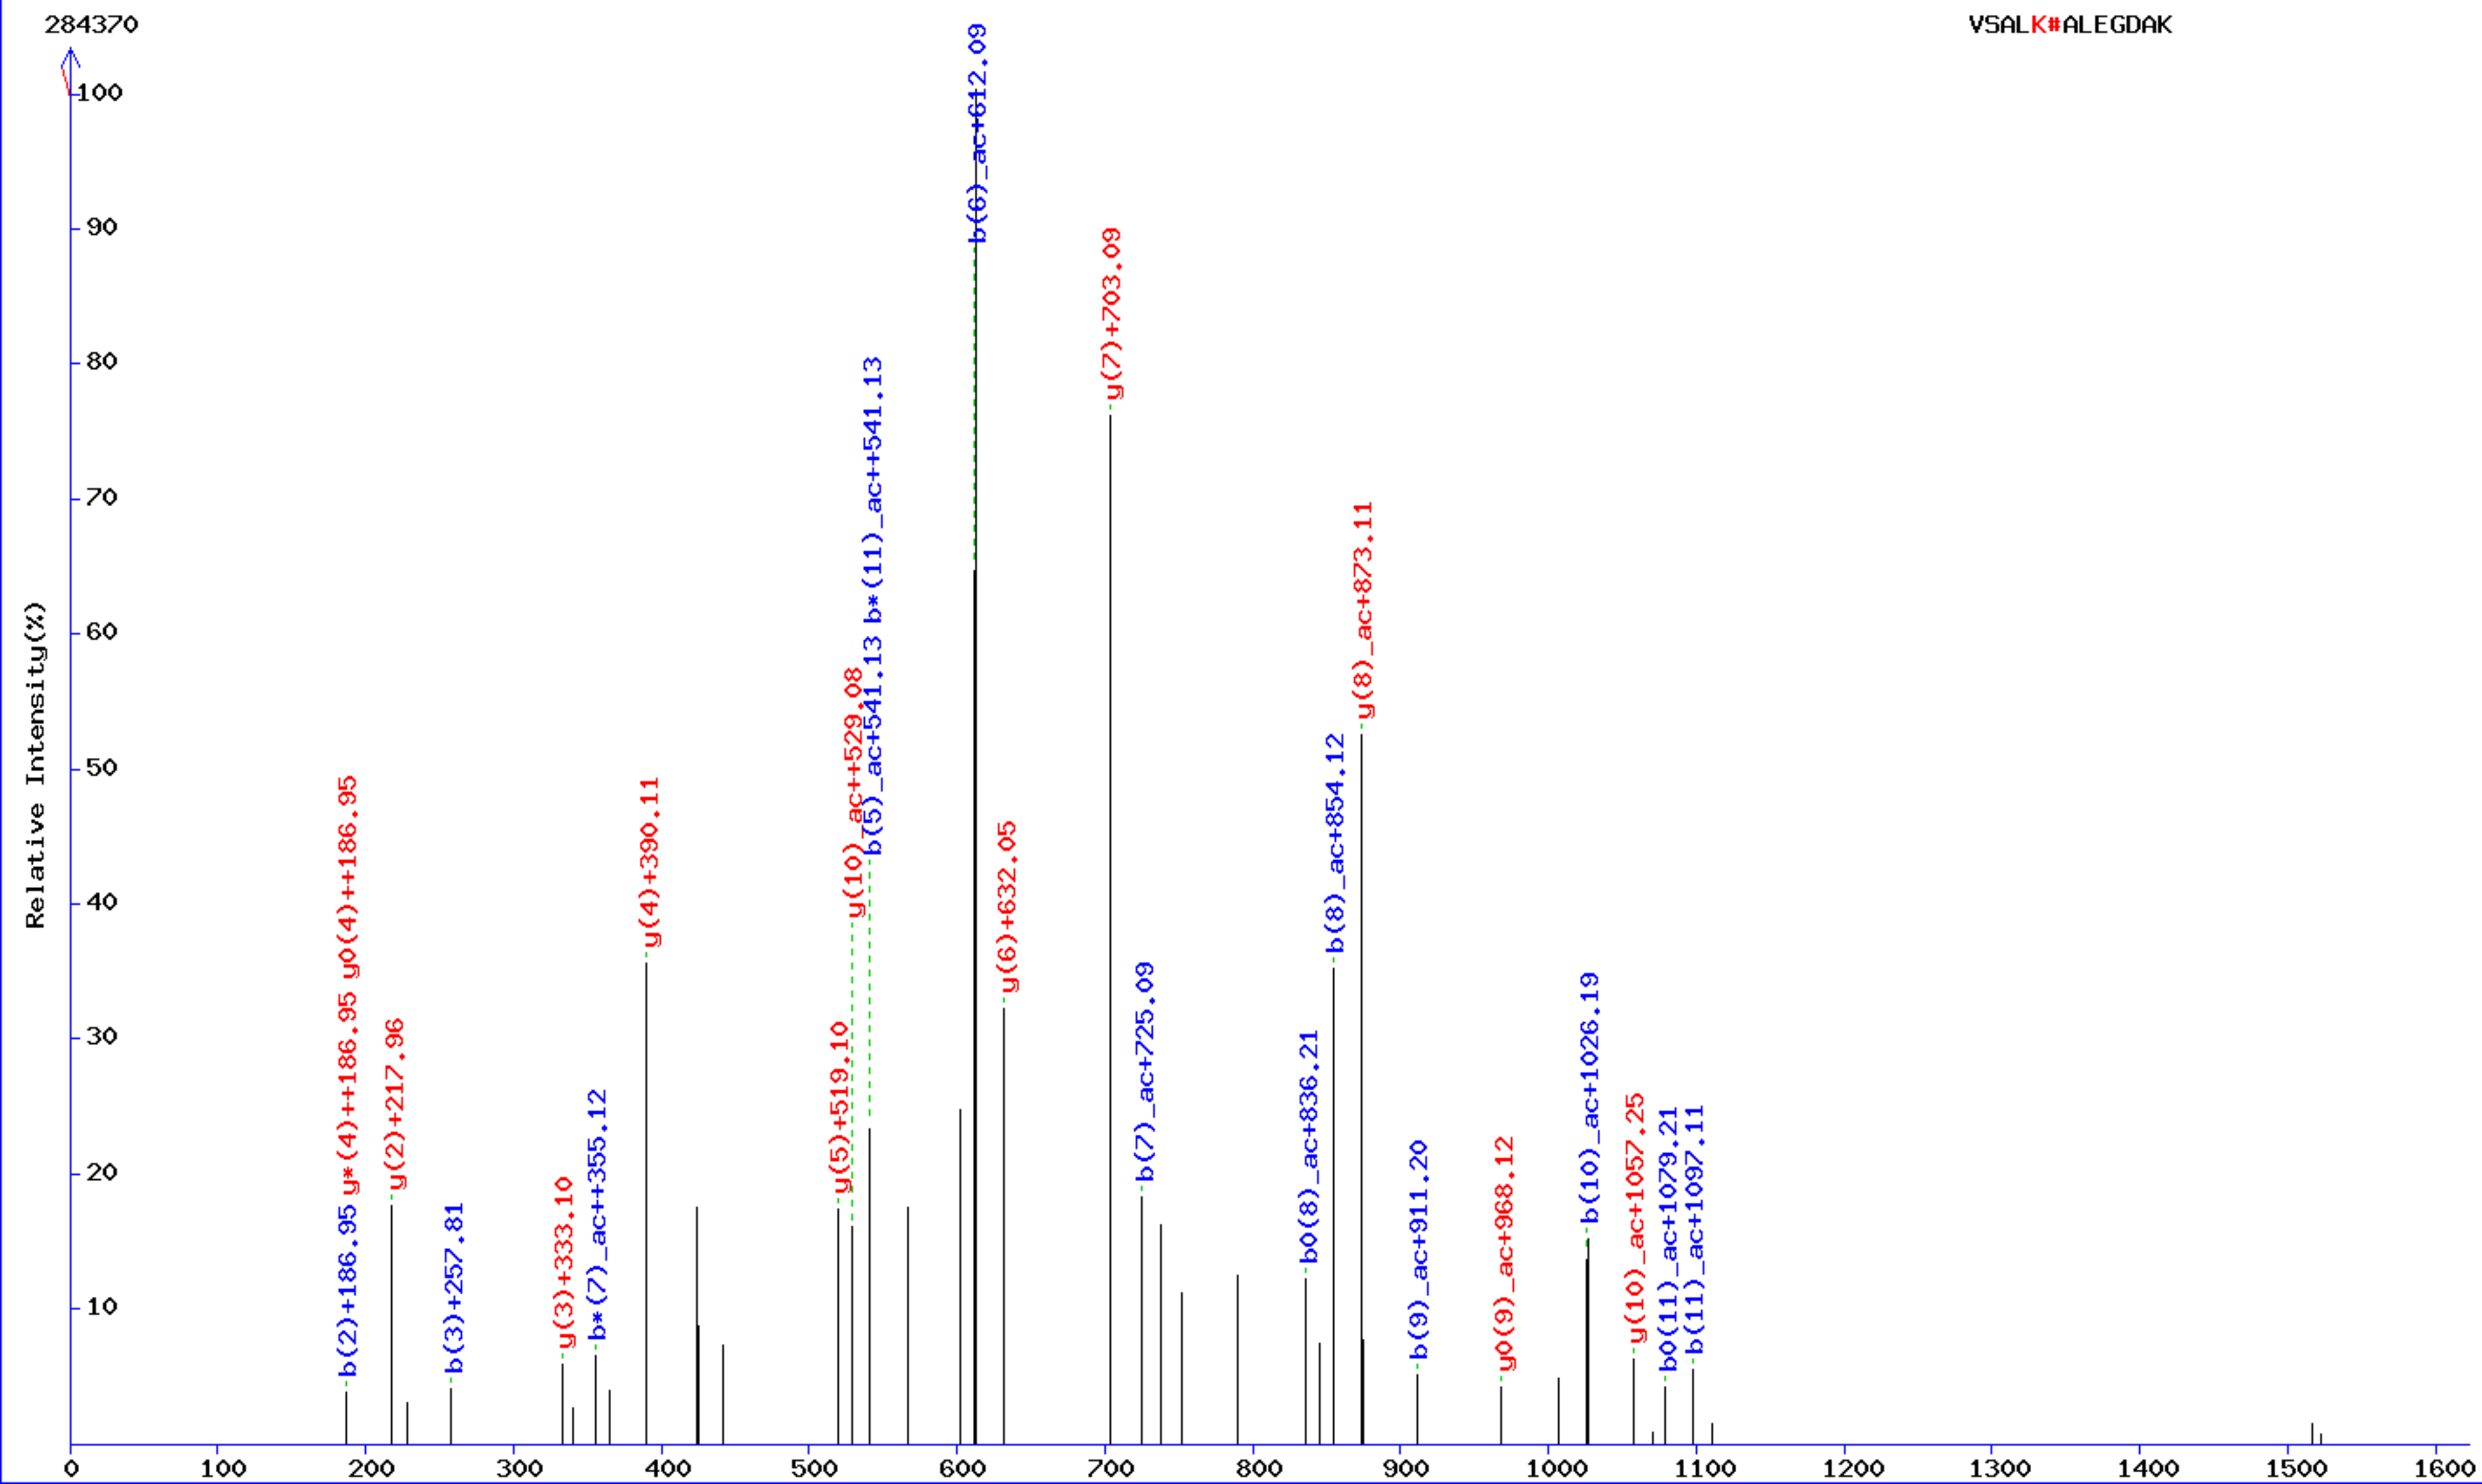

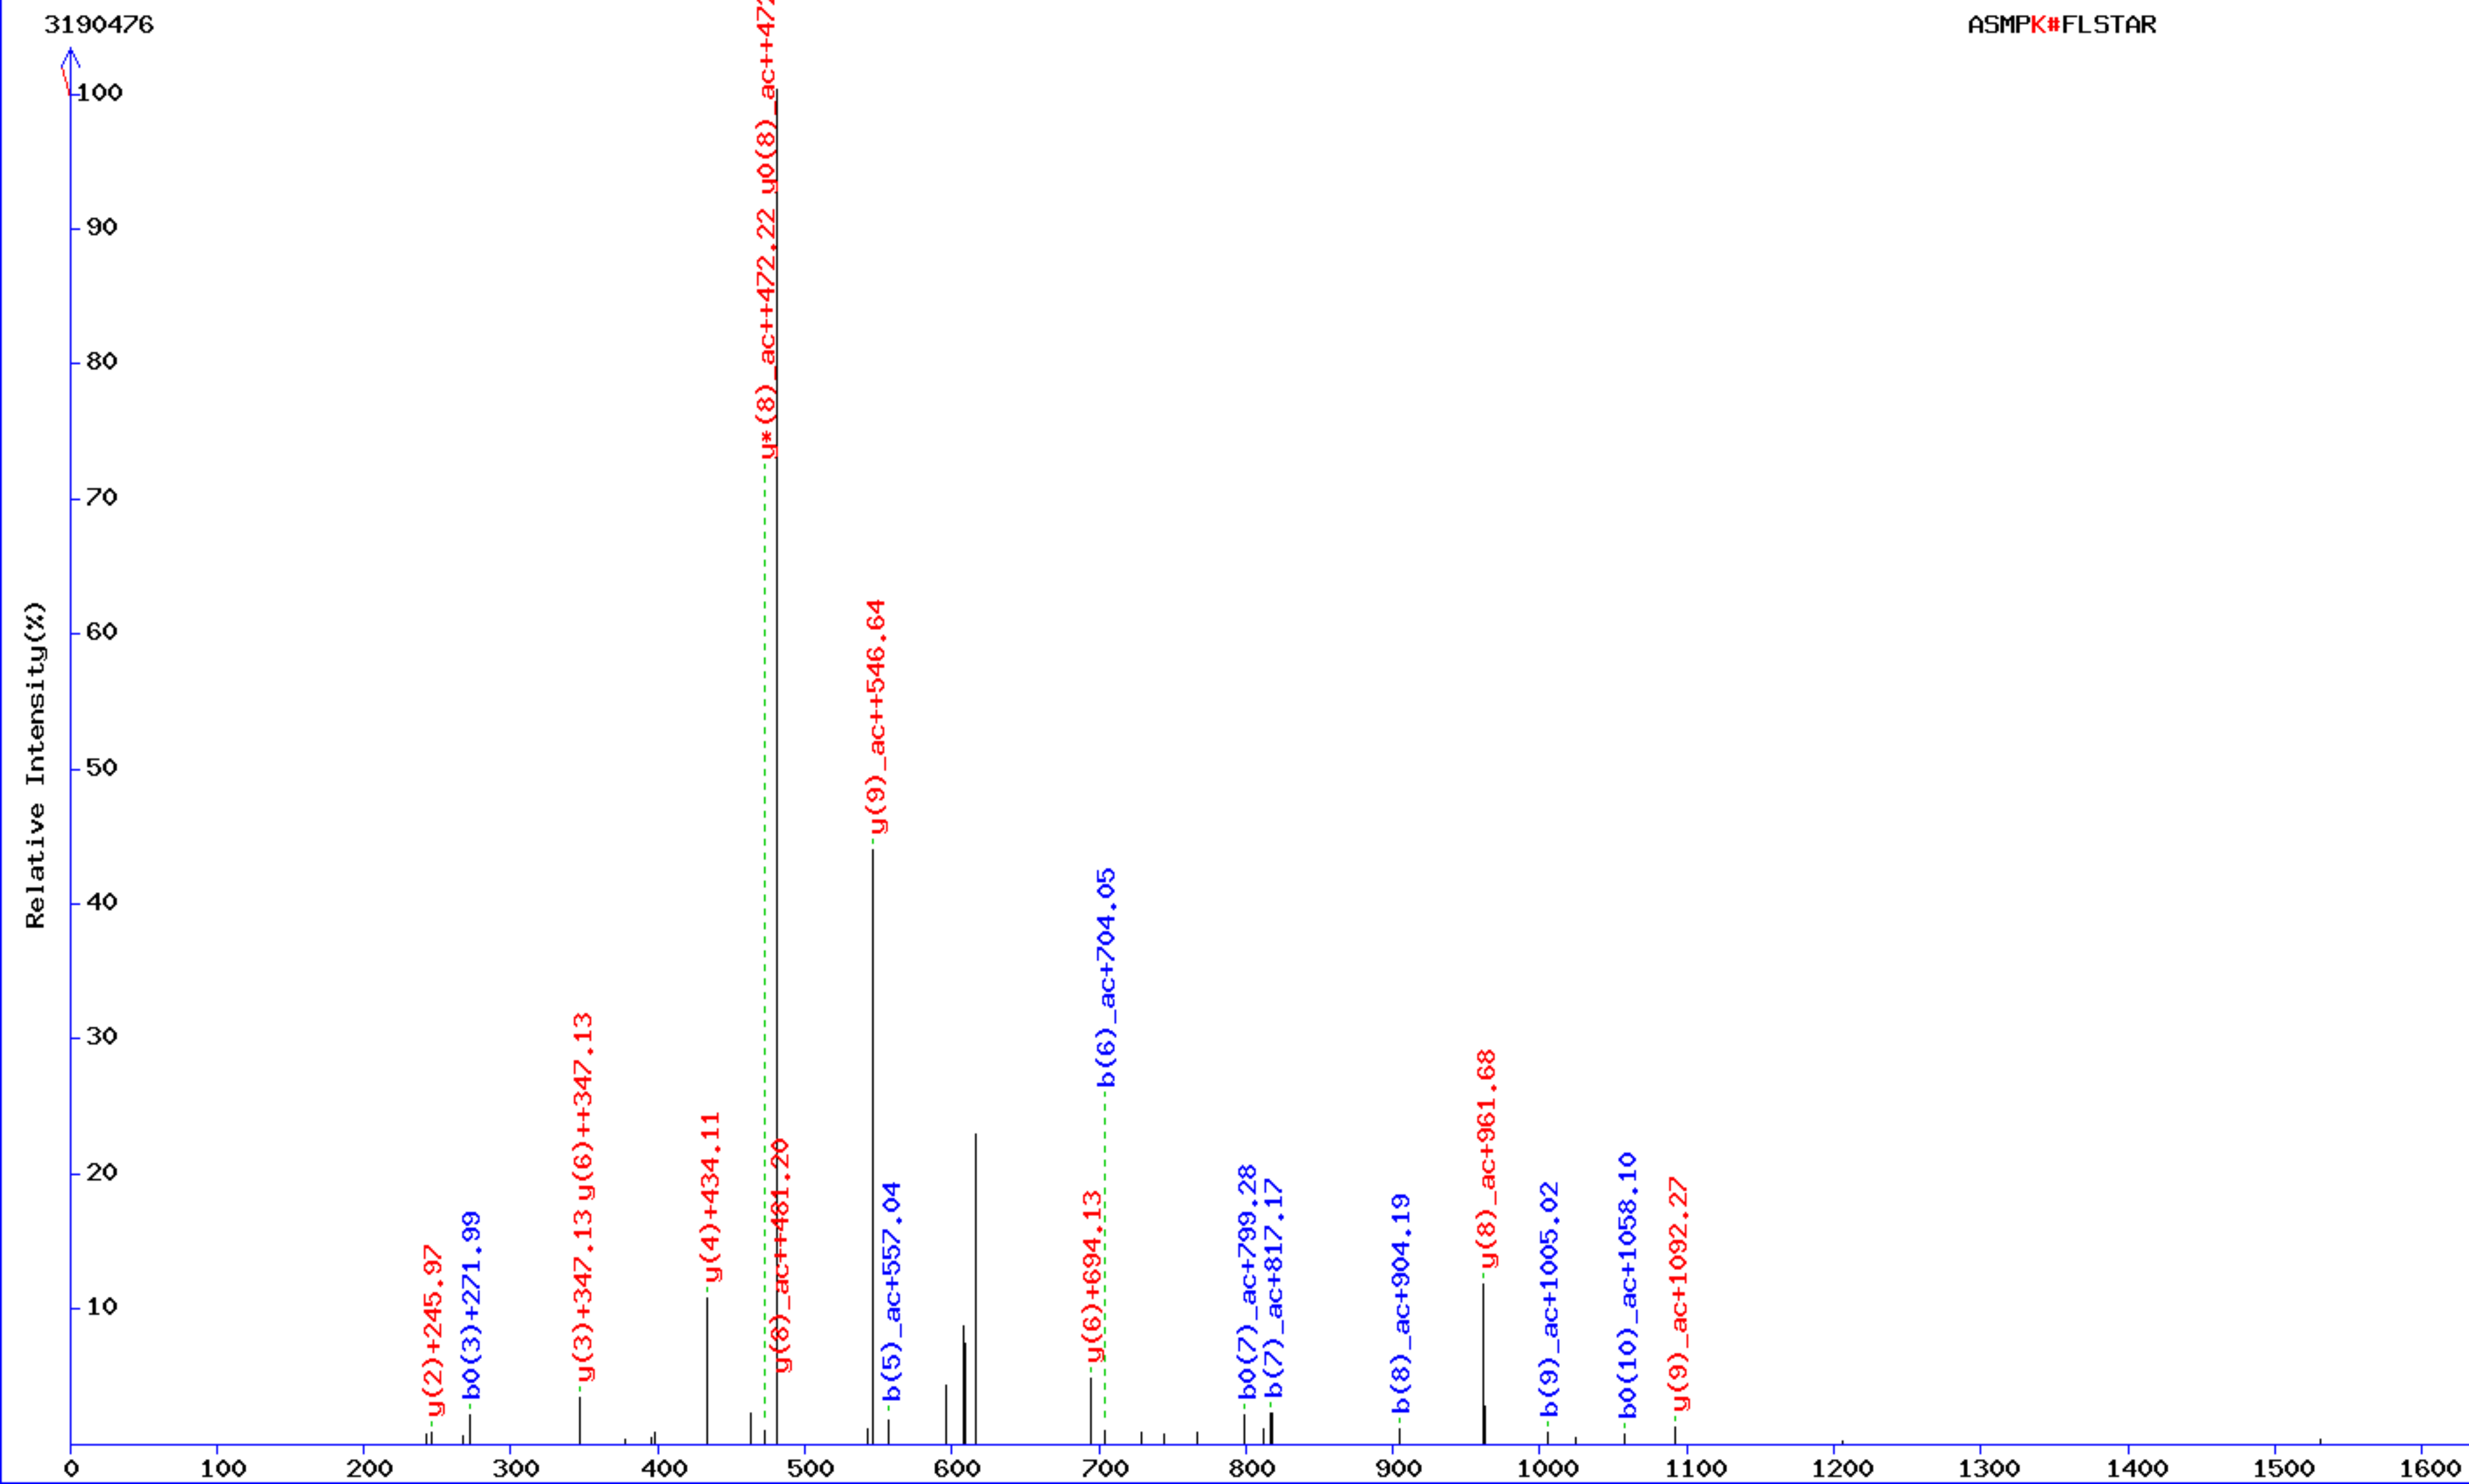



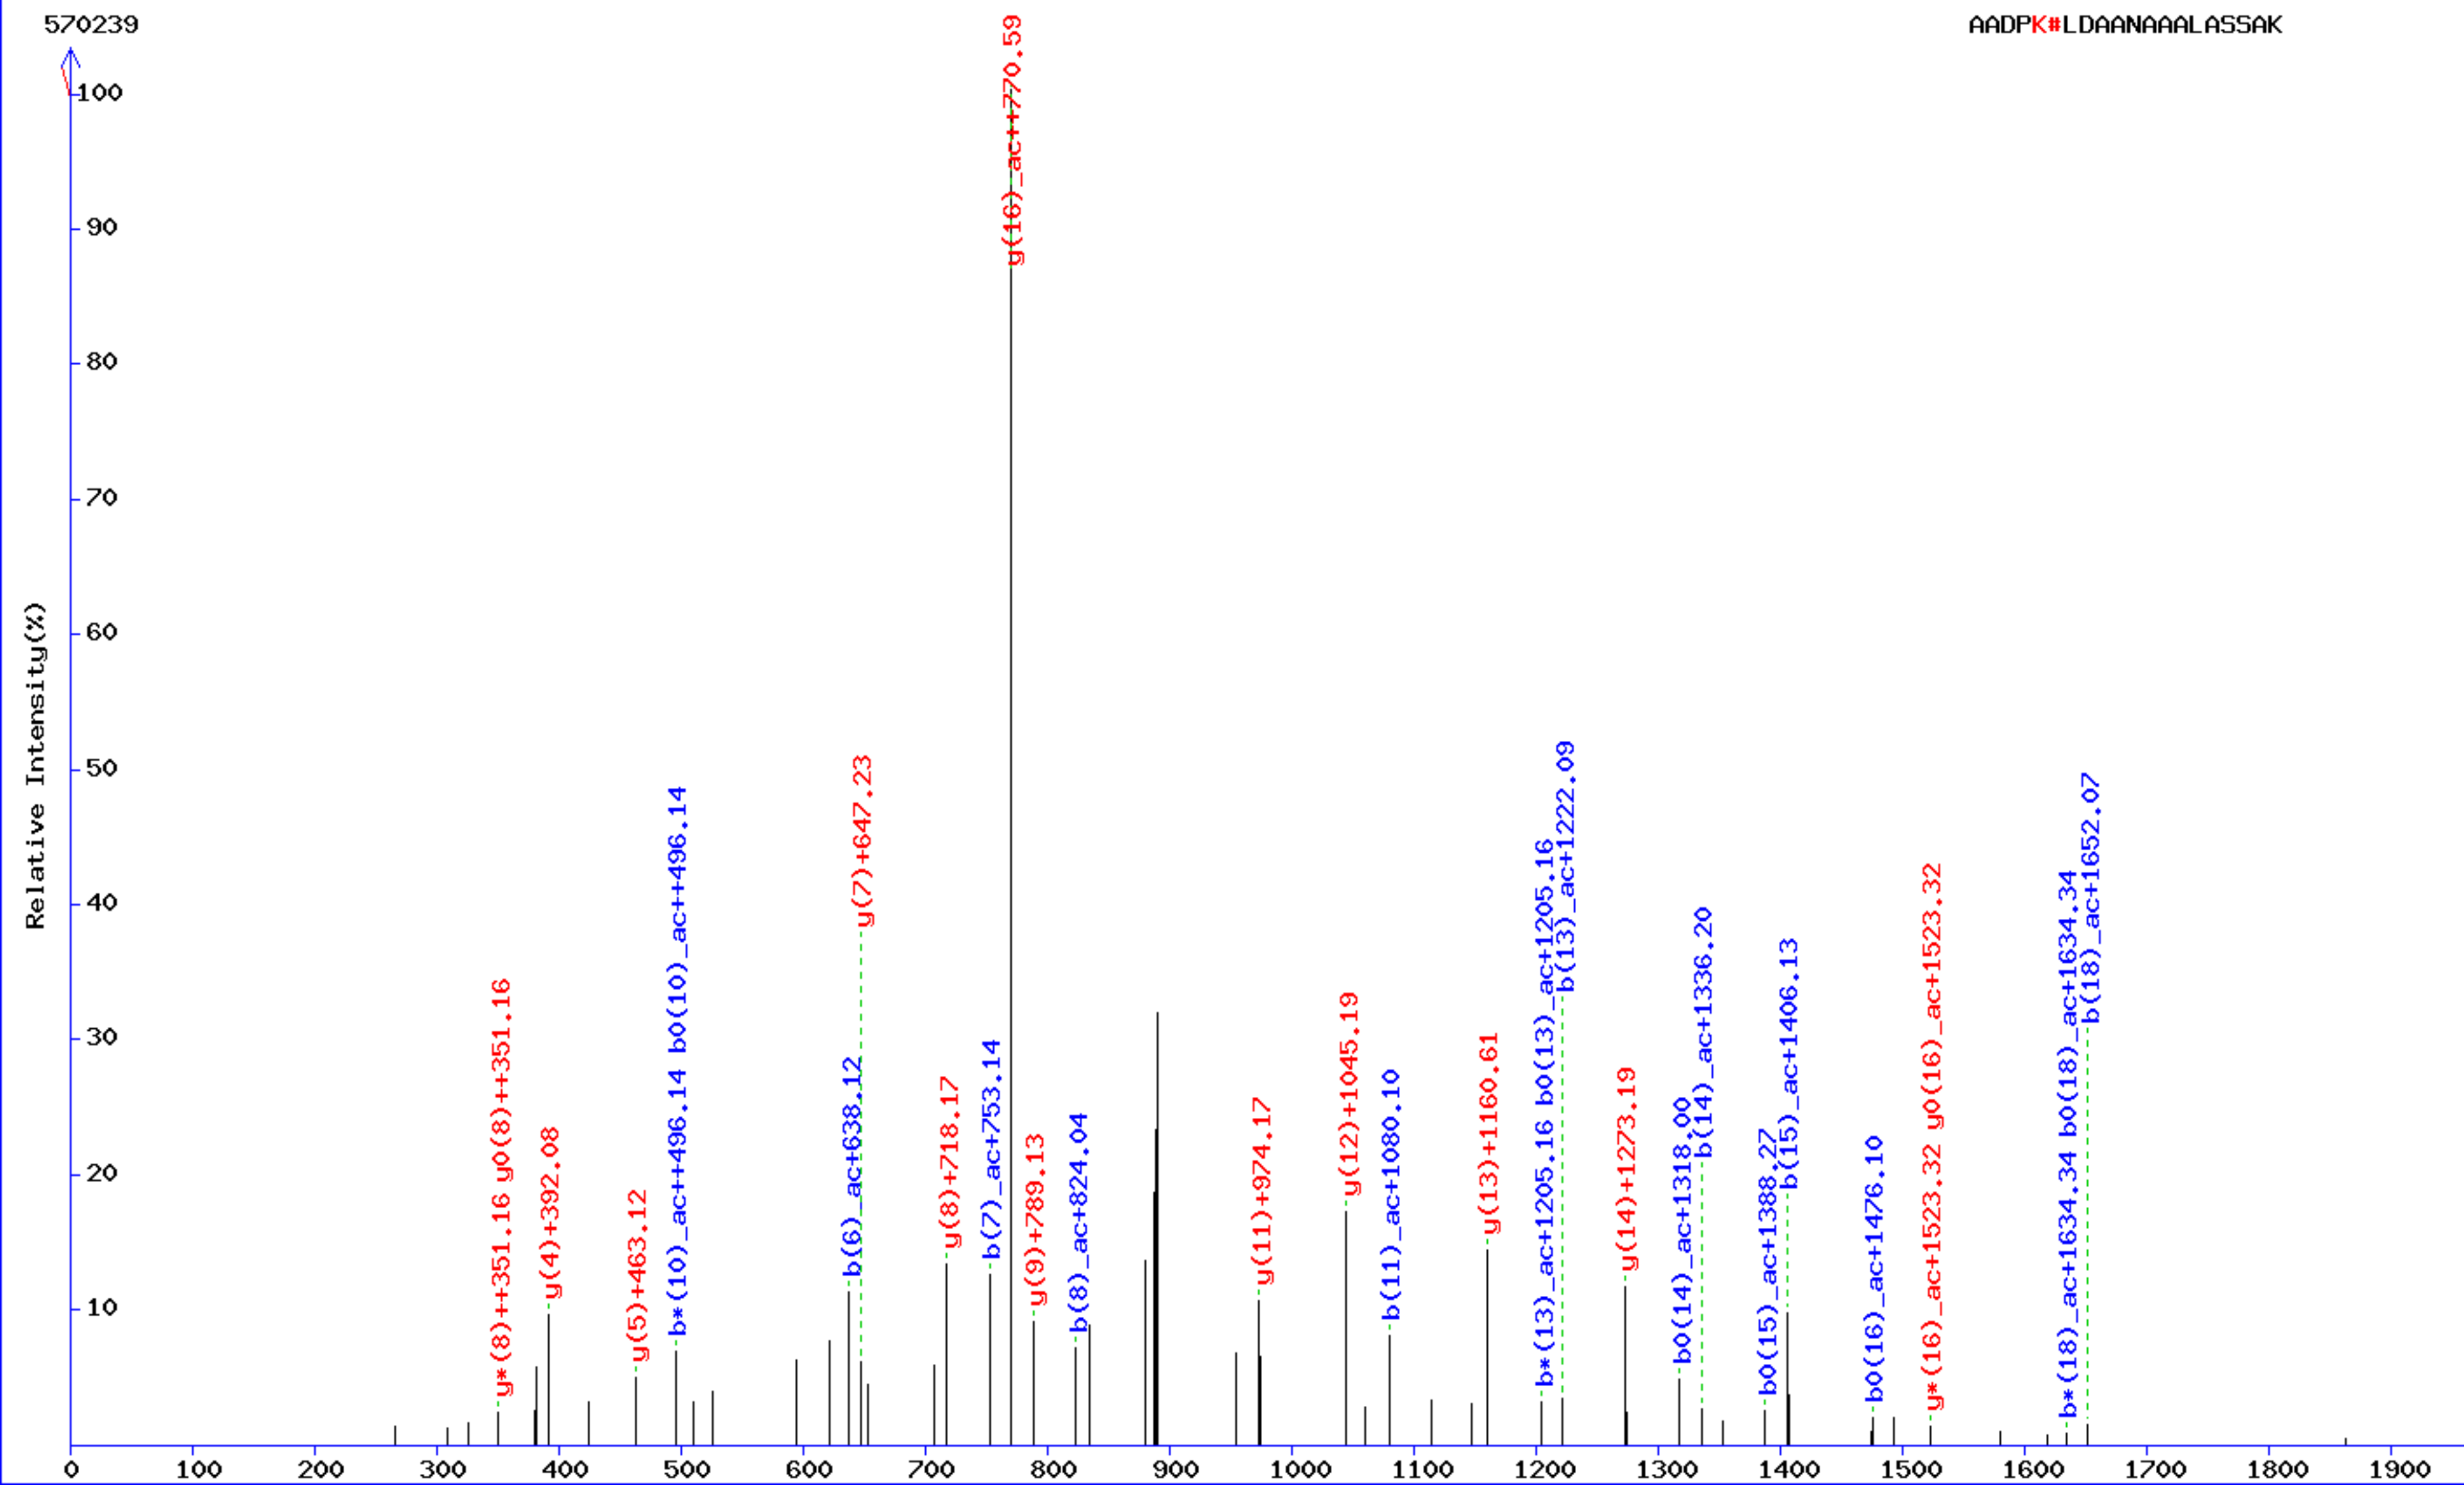

# gi|148660228 MRA\_0468 dihydrolipoamide dehydrogenase

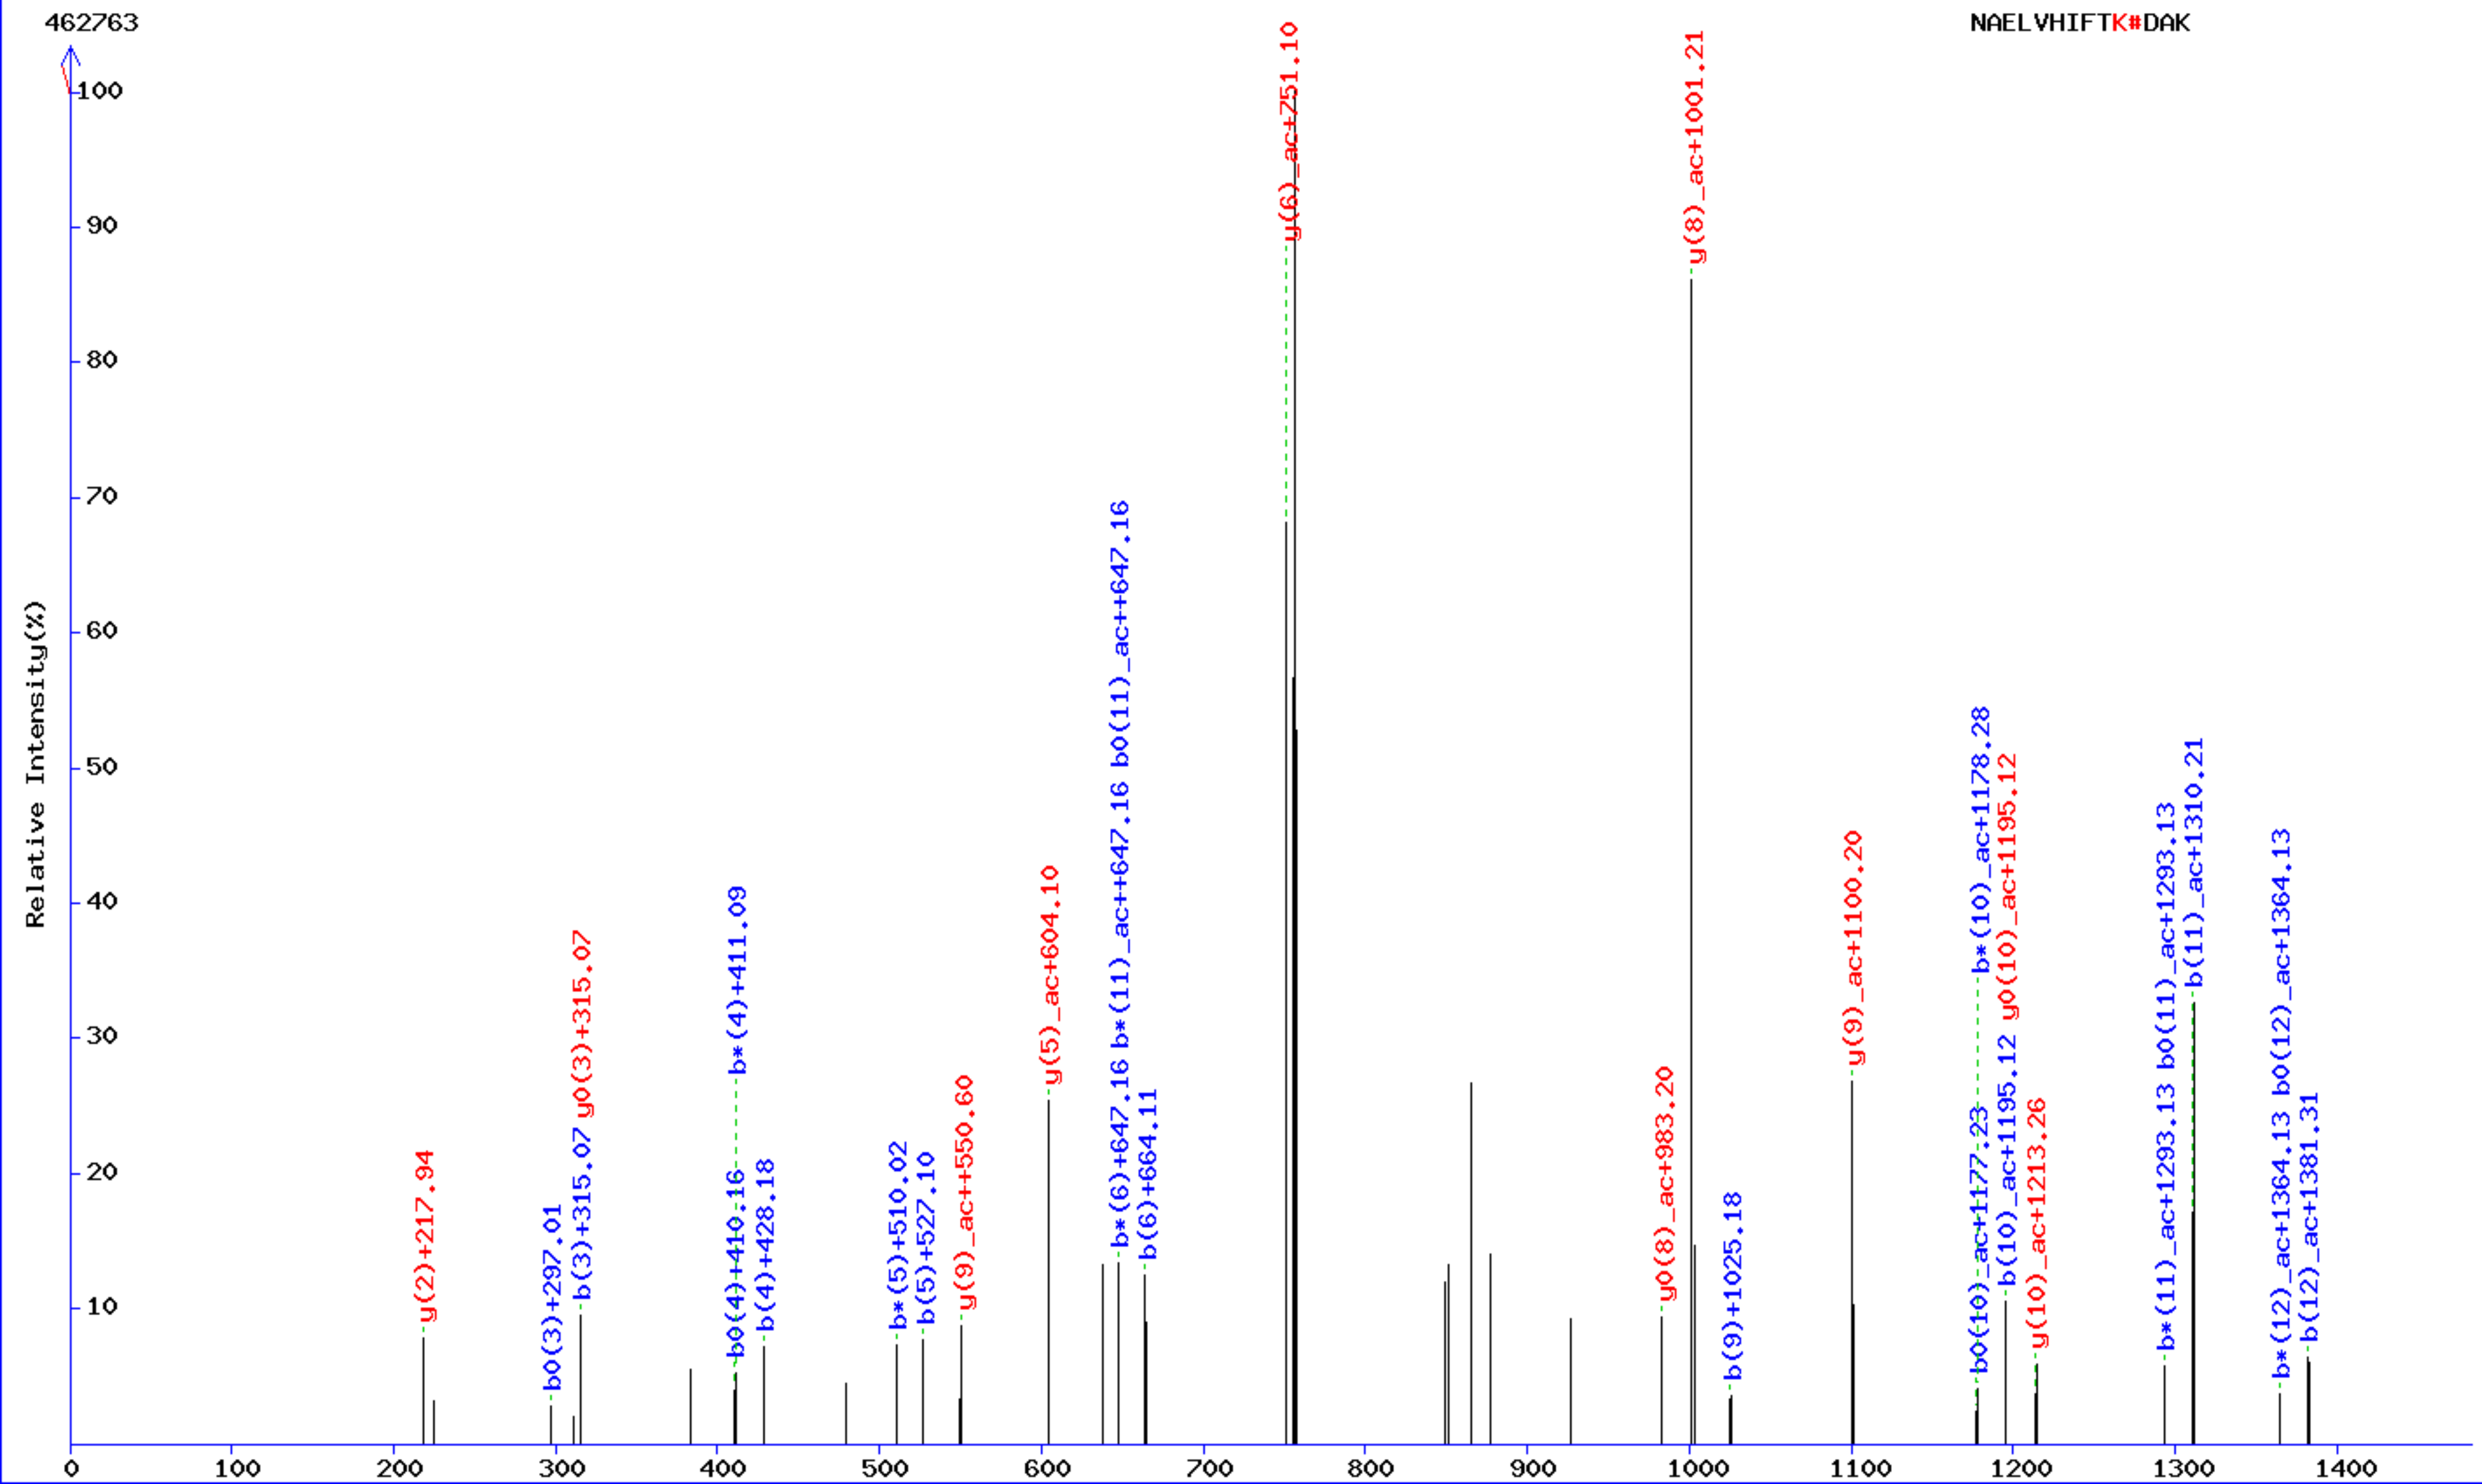

# gi|148662881 MRA\_3060 electron transfer flavoprotein subunit beta

FPSFK#GIM#AAK

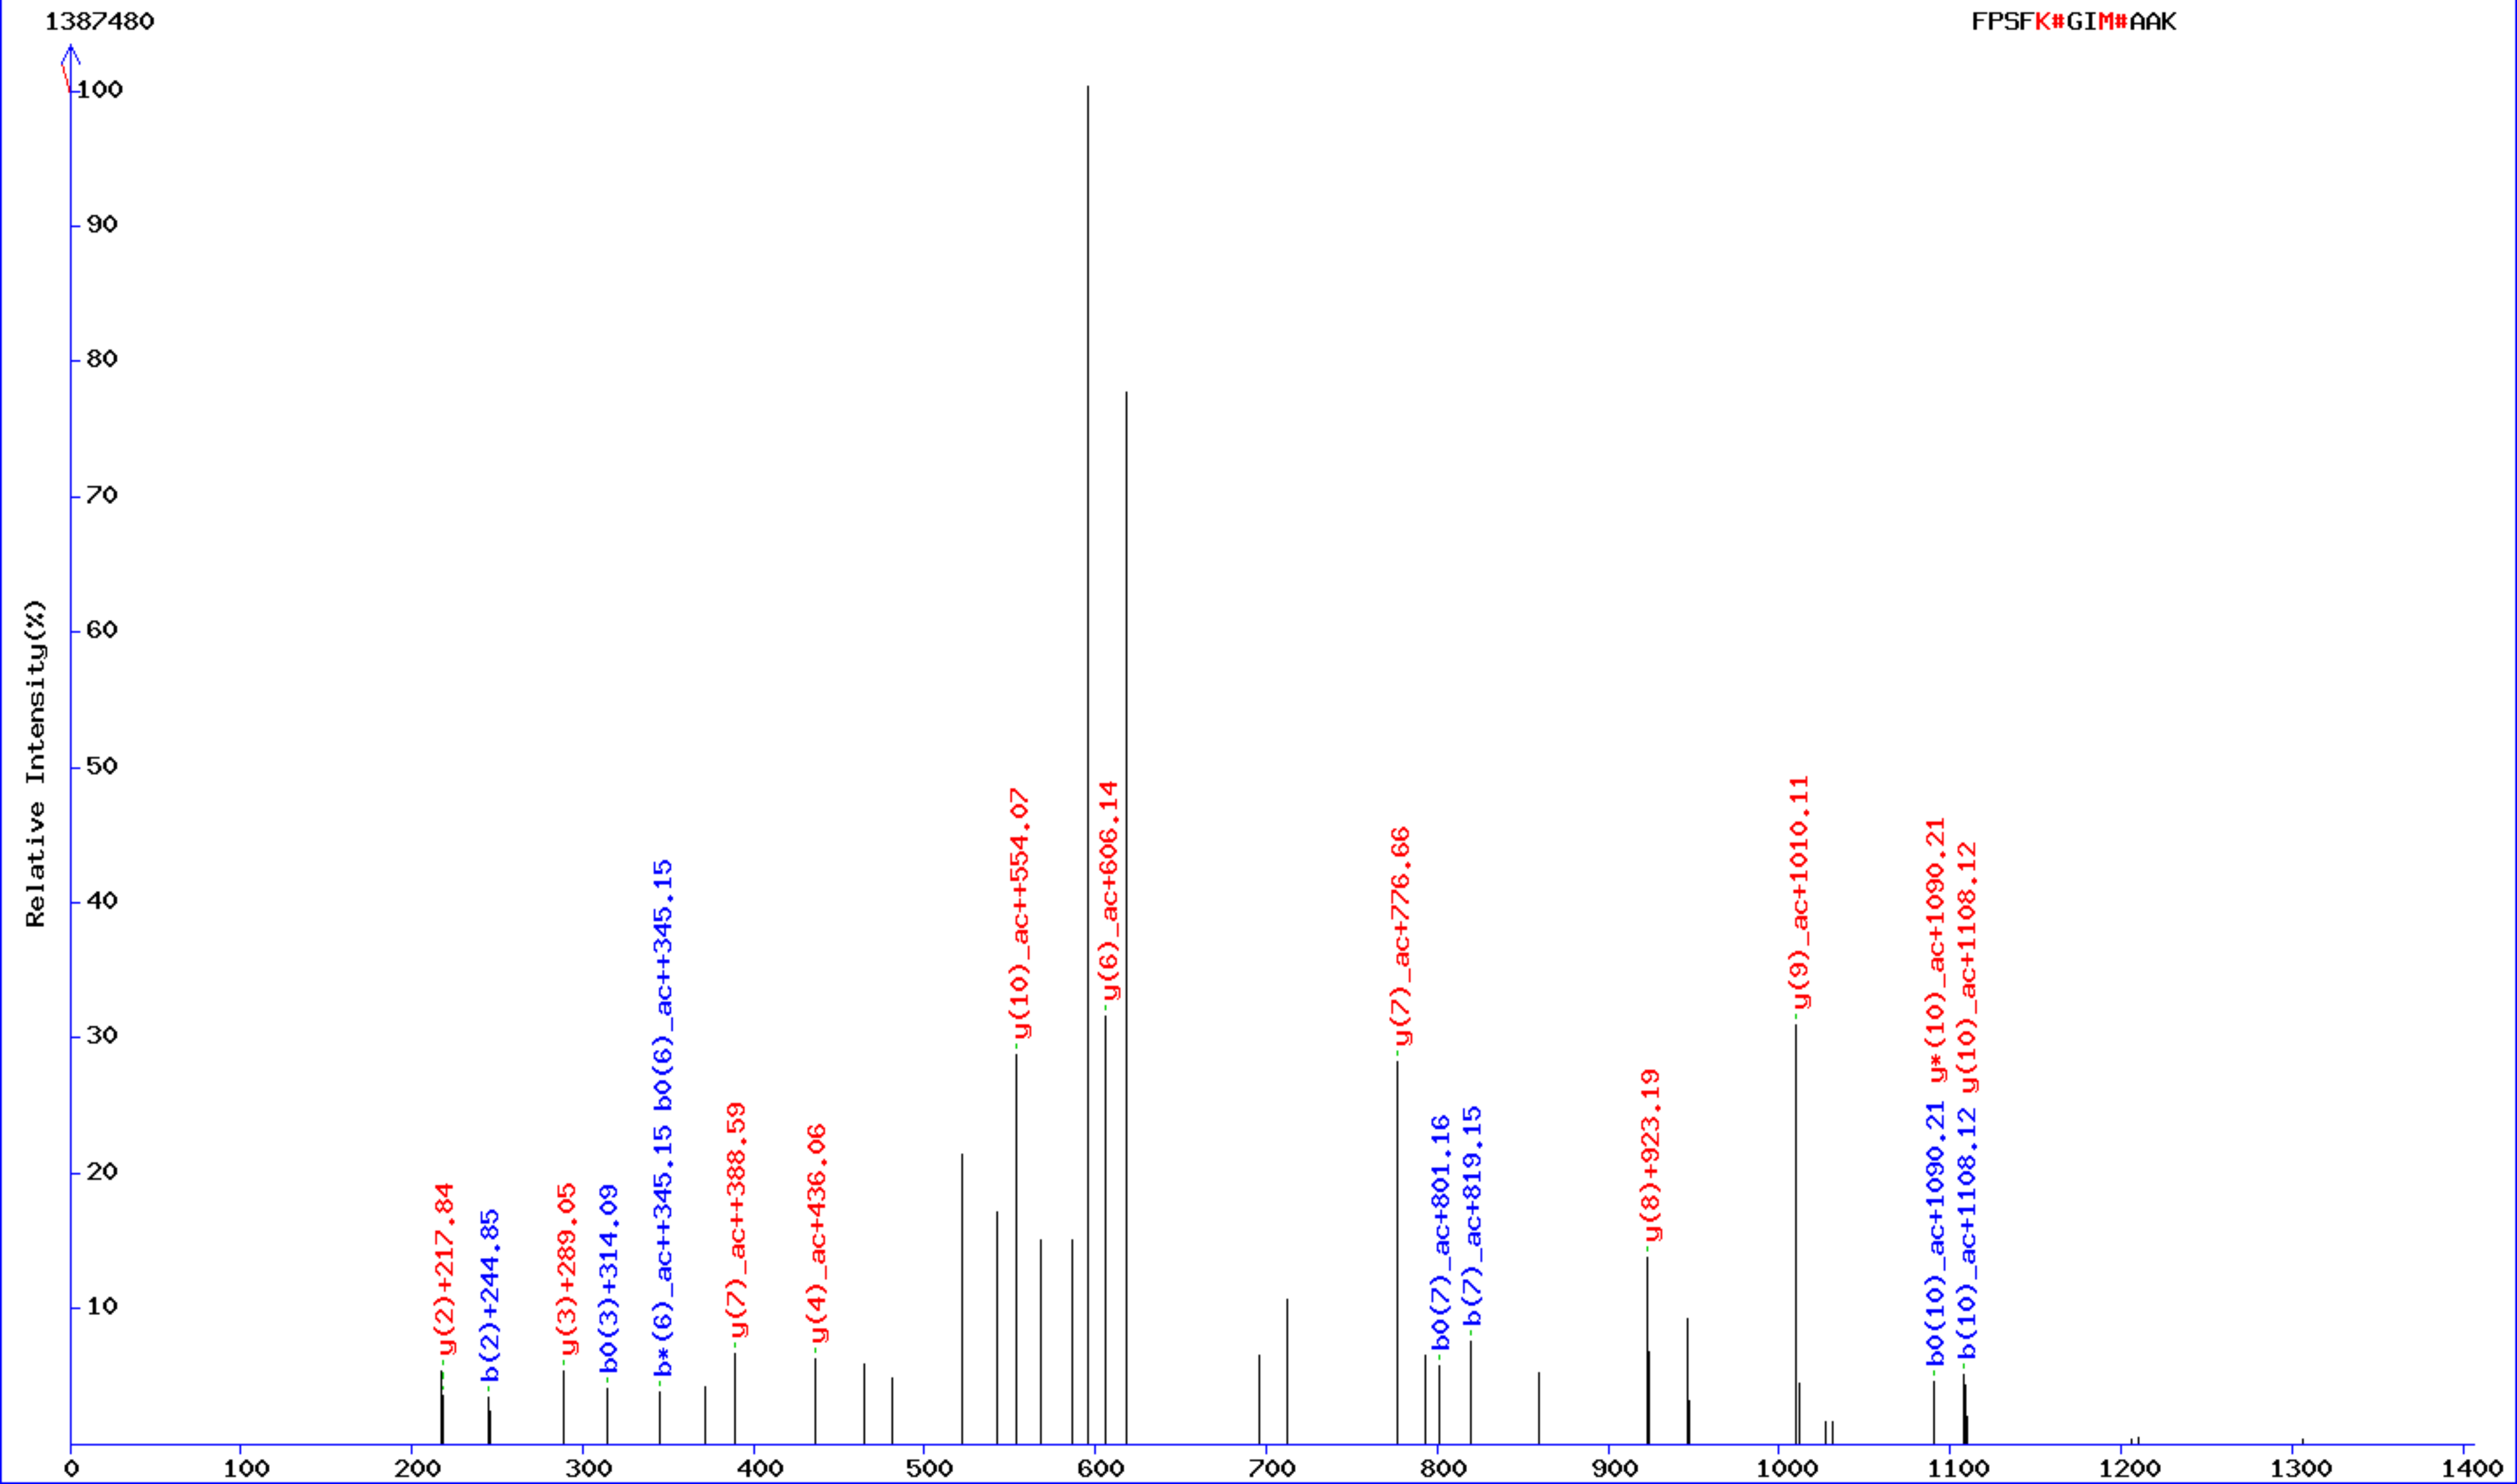

gi|148661956 MRA\_2155 hypothetical protein

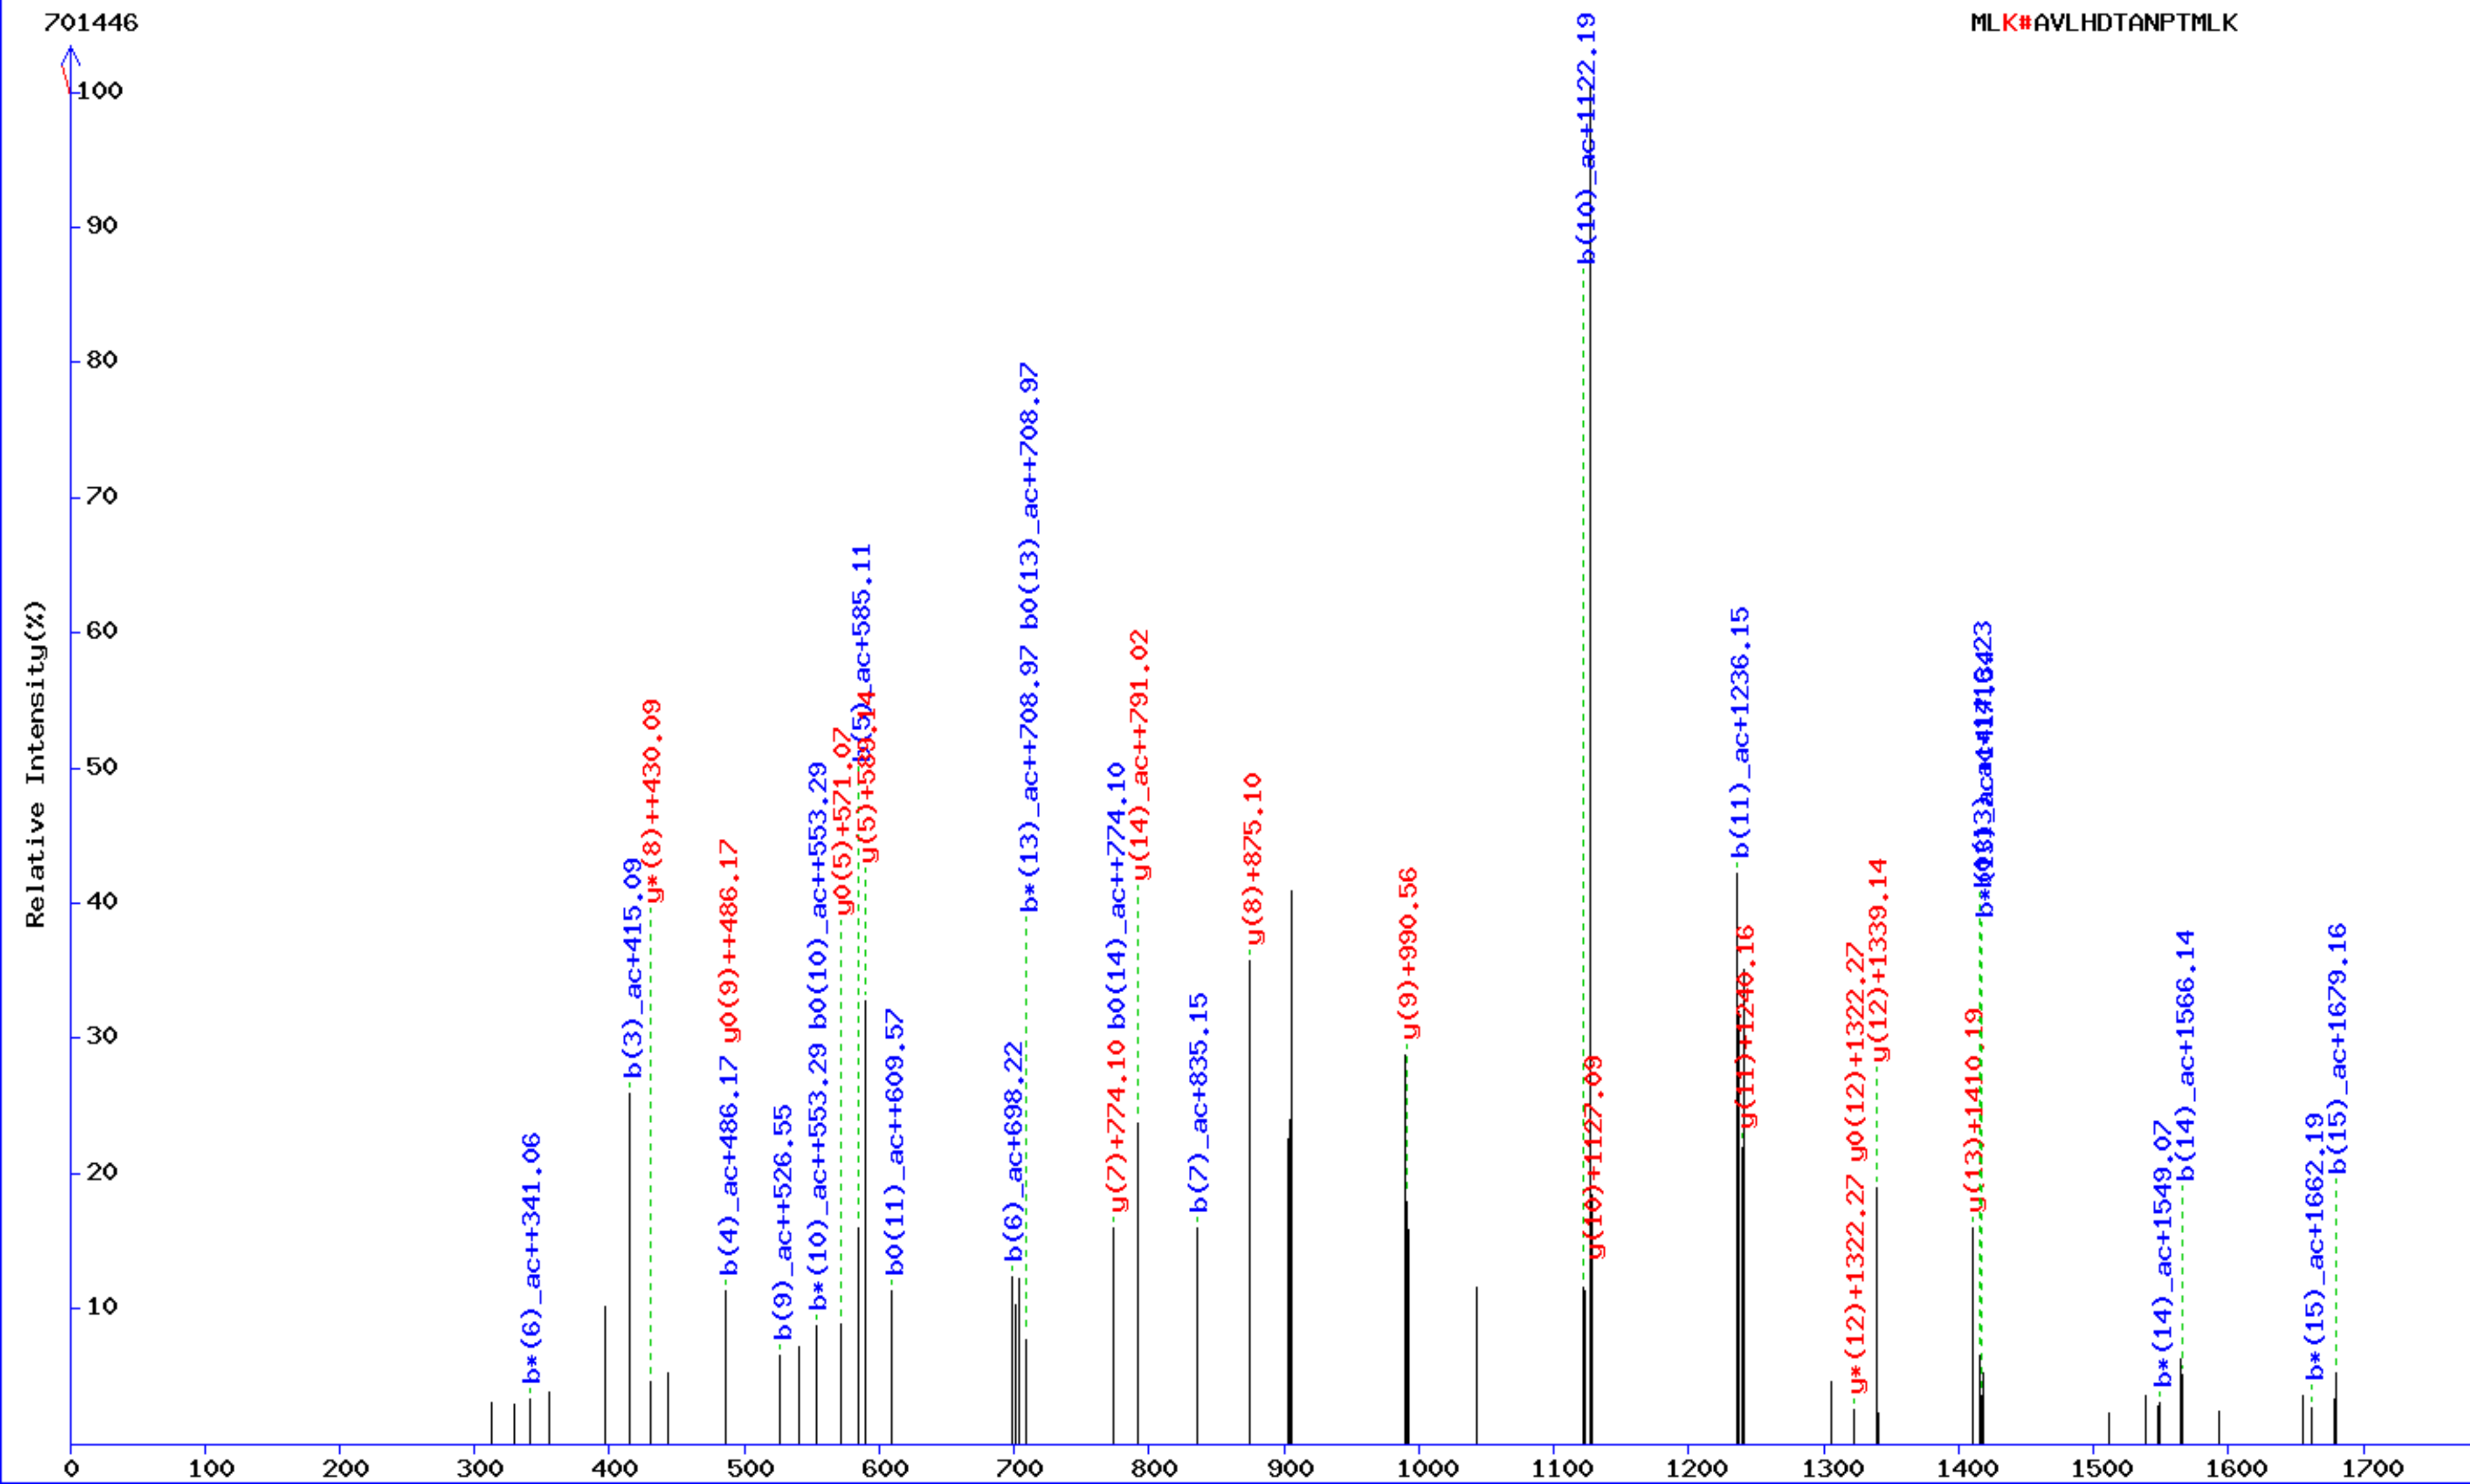

# gi|148662080 MRA\_2279 transcriptional regulatory protein

AVK#LMAQAFGASR

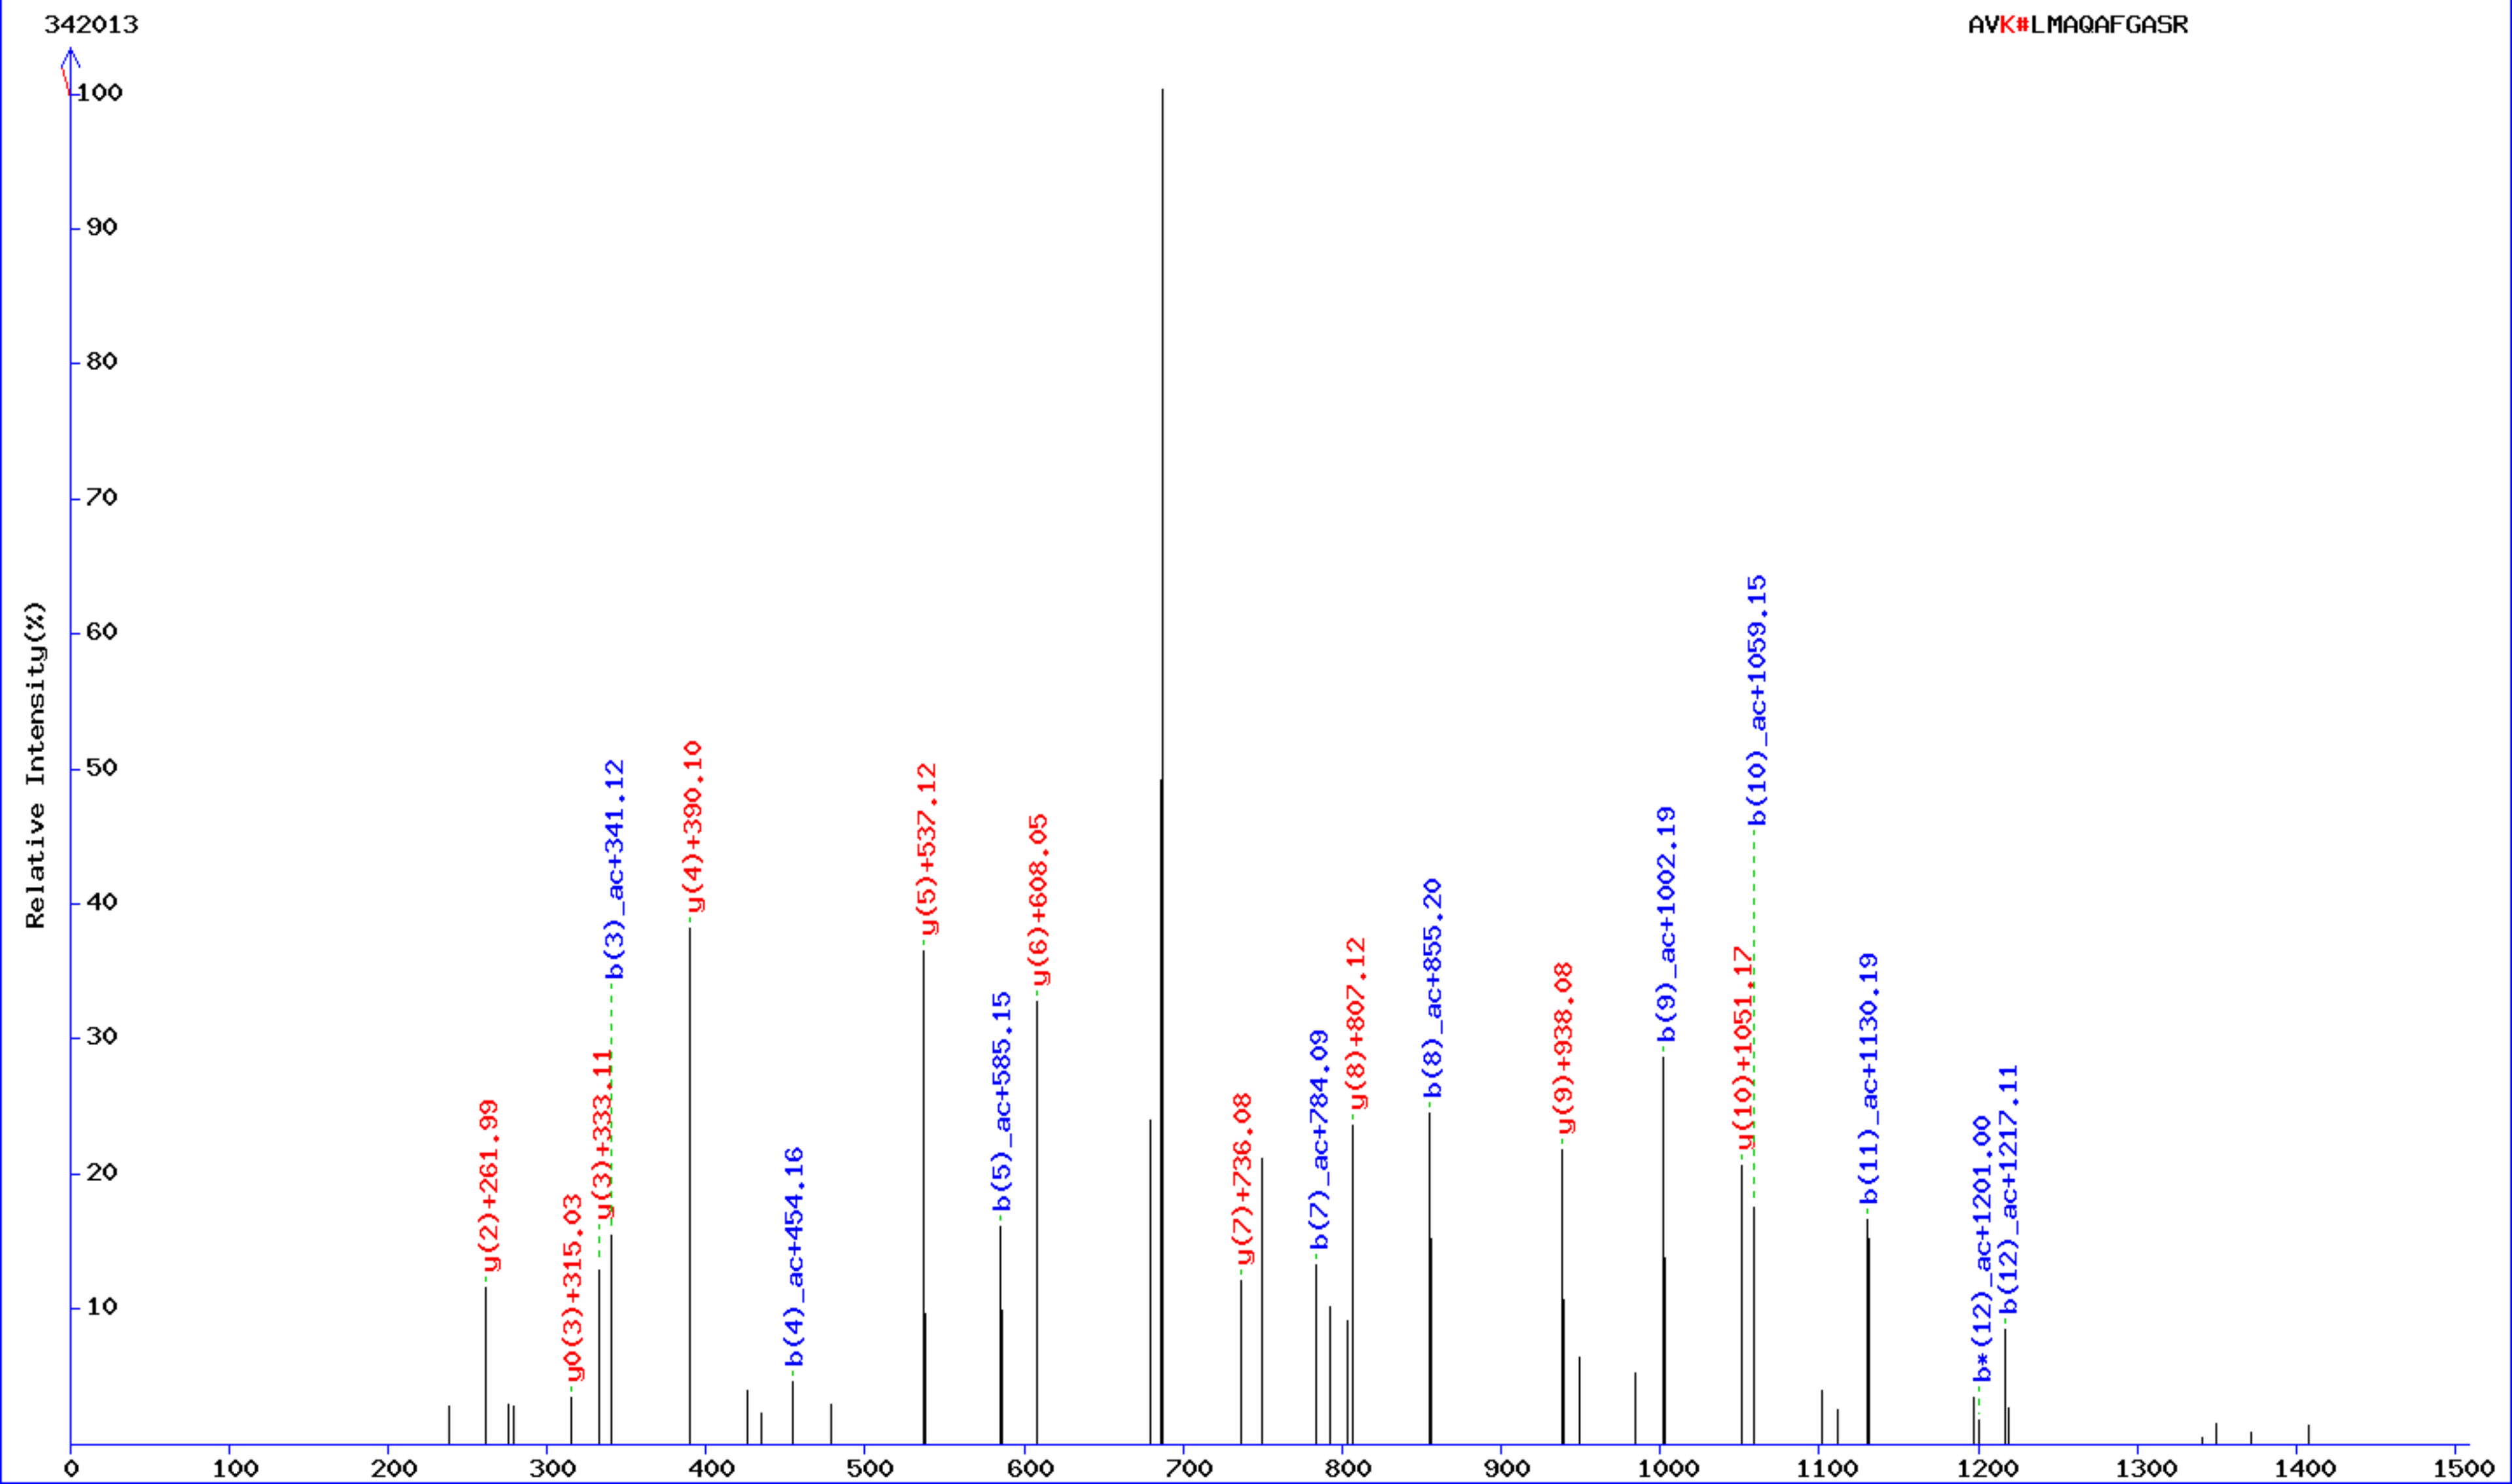

gi|148660007 MRA\_0251 3-ketoacyl-ACP reductase

AALEK#DYDLVGNLGR

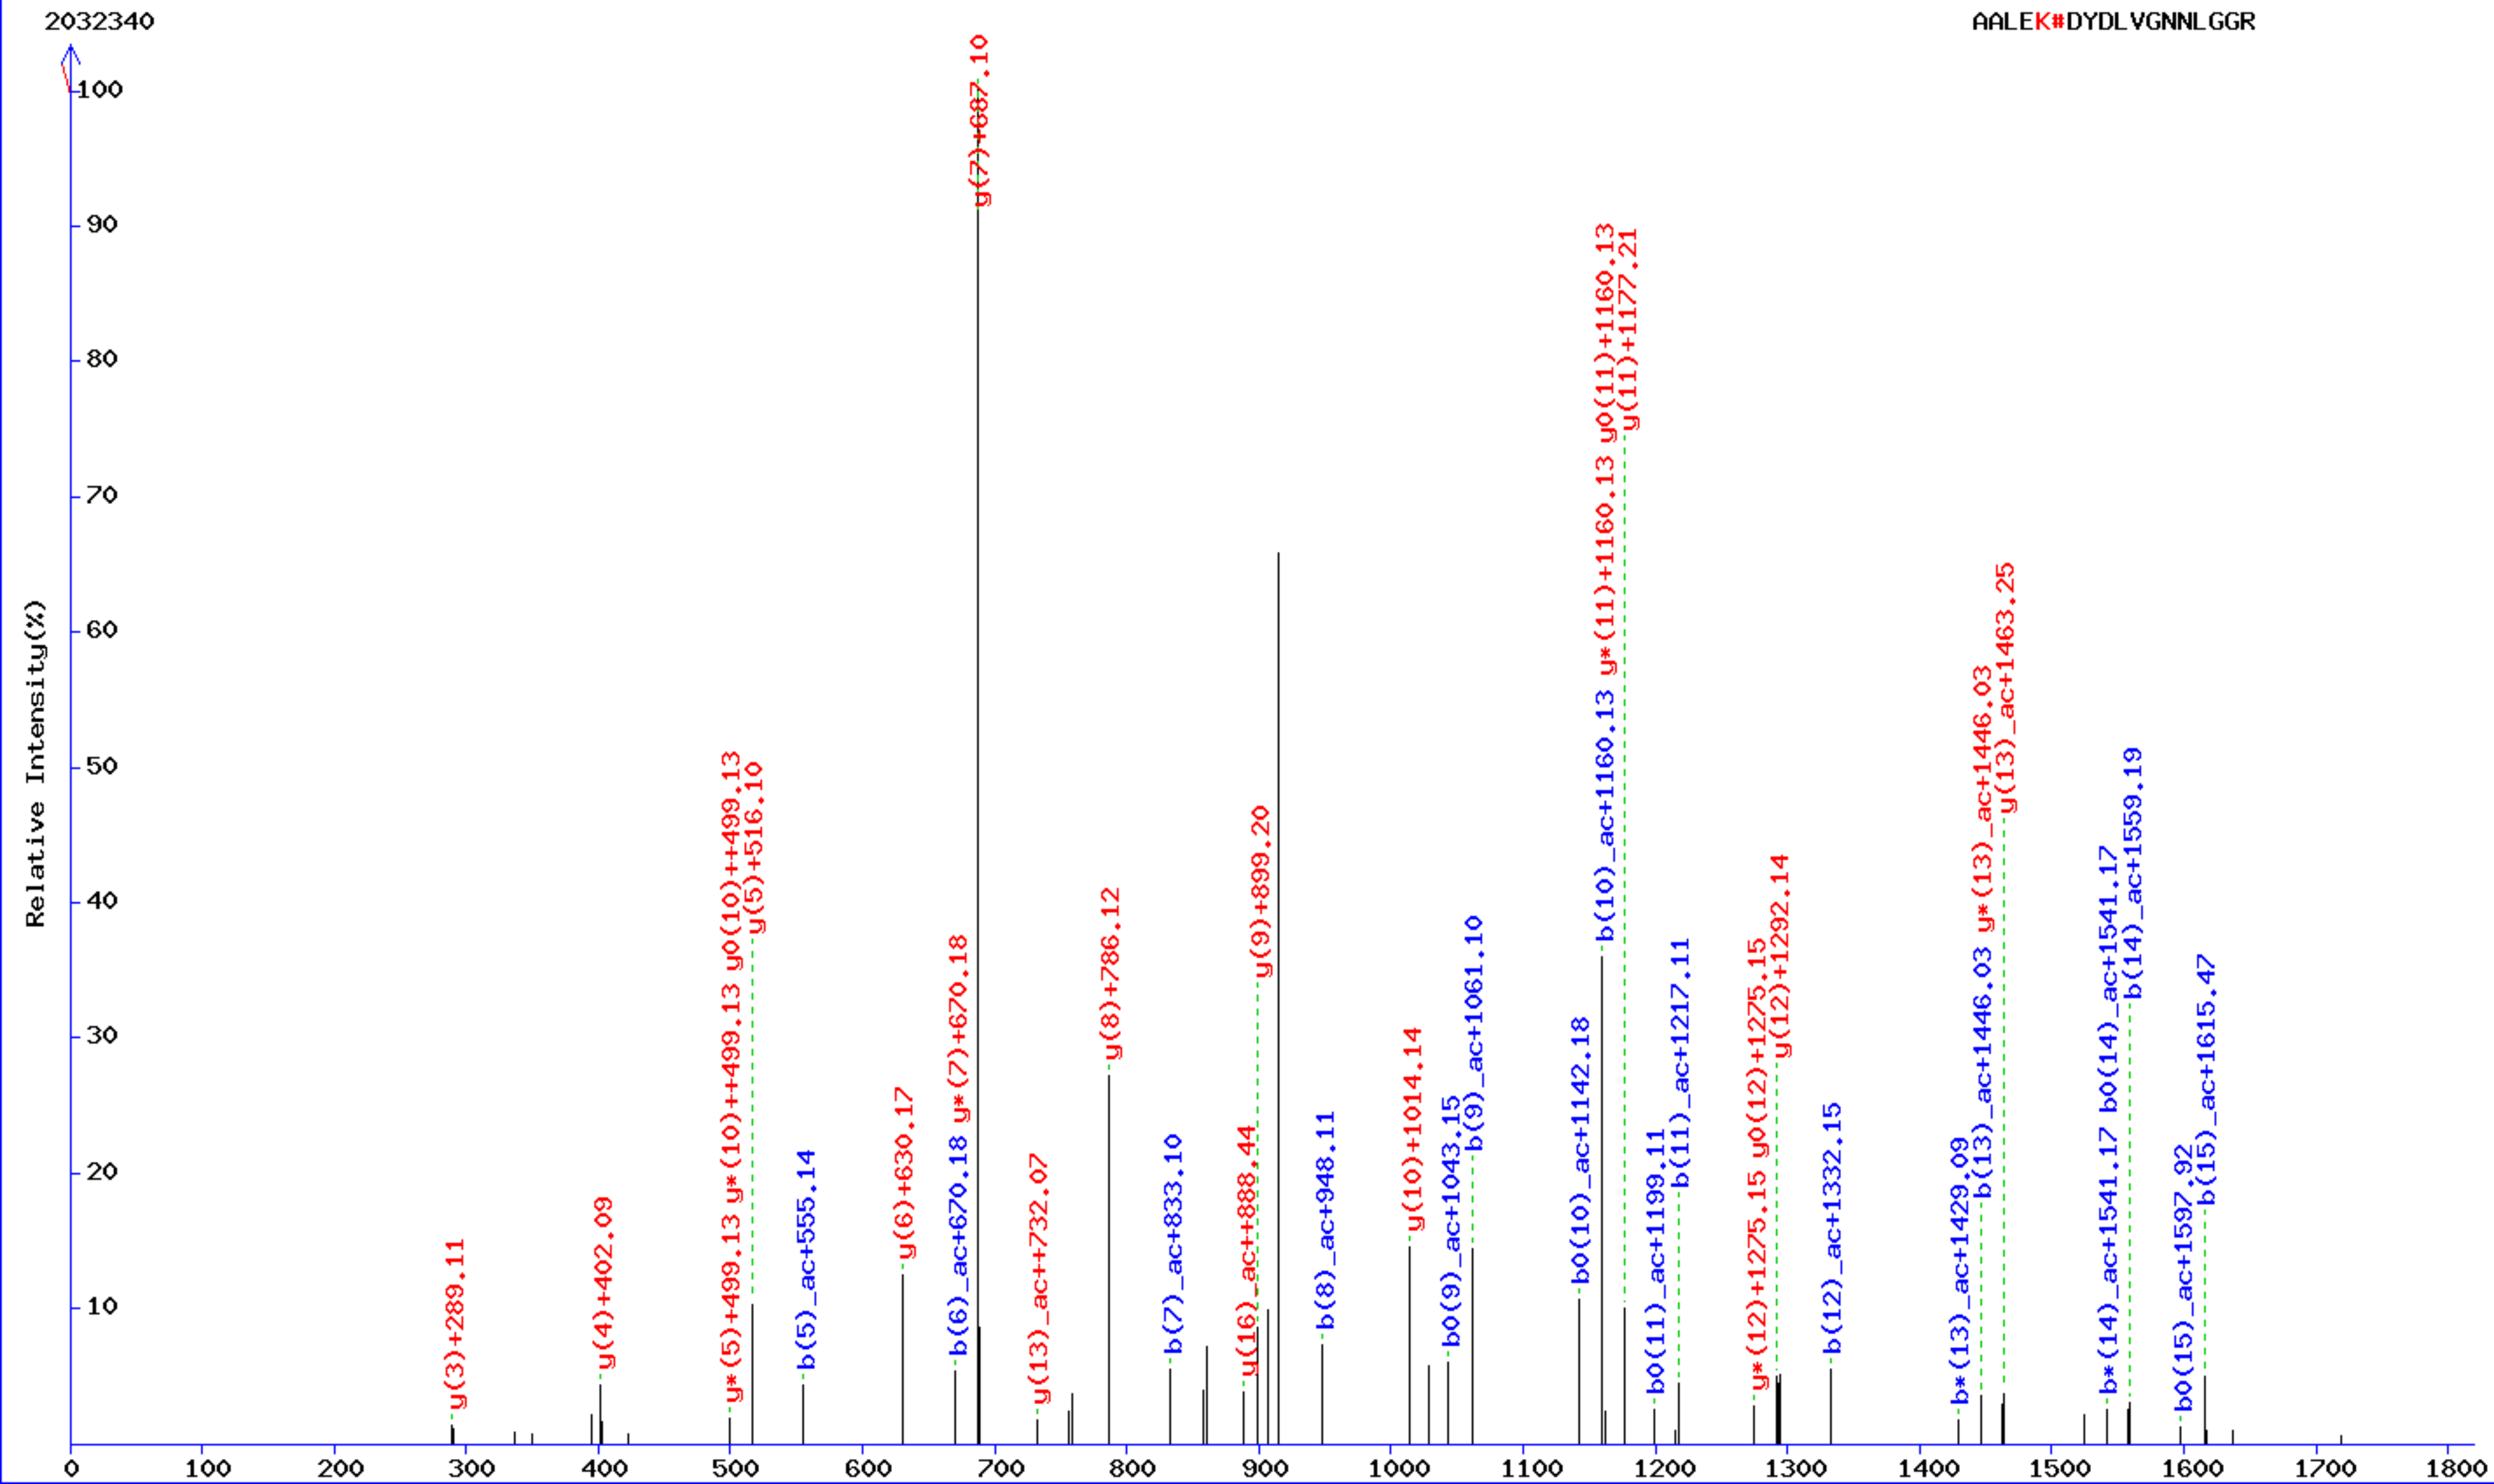

# gi|148661454 MRA\_1669 argininosuccinate synthase

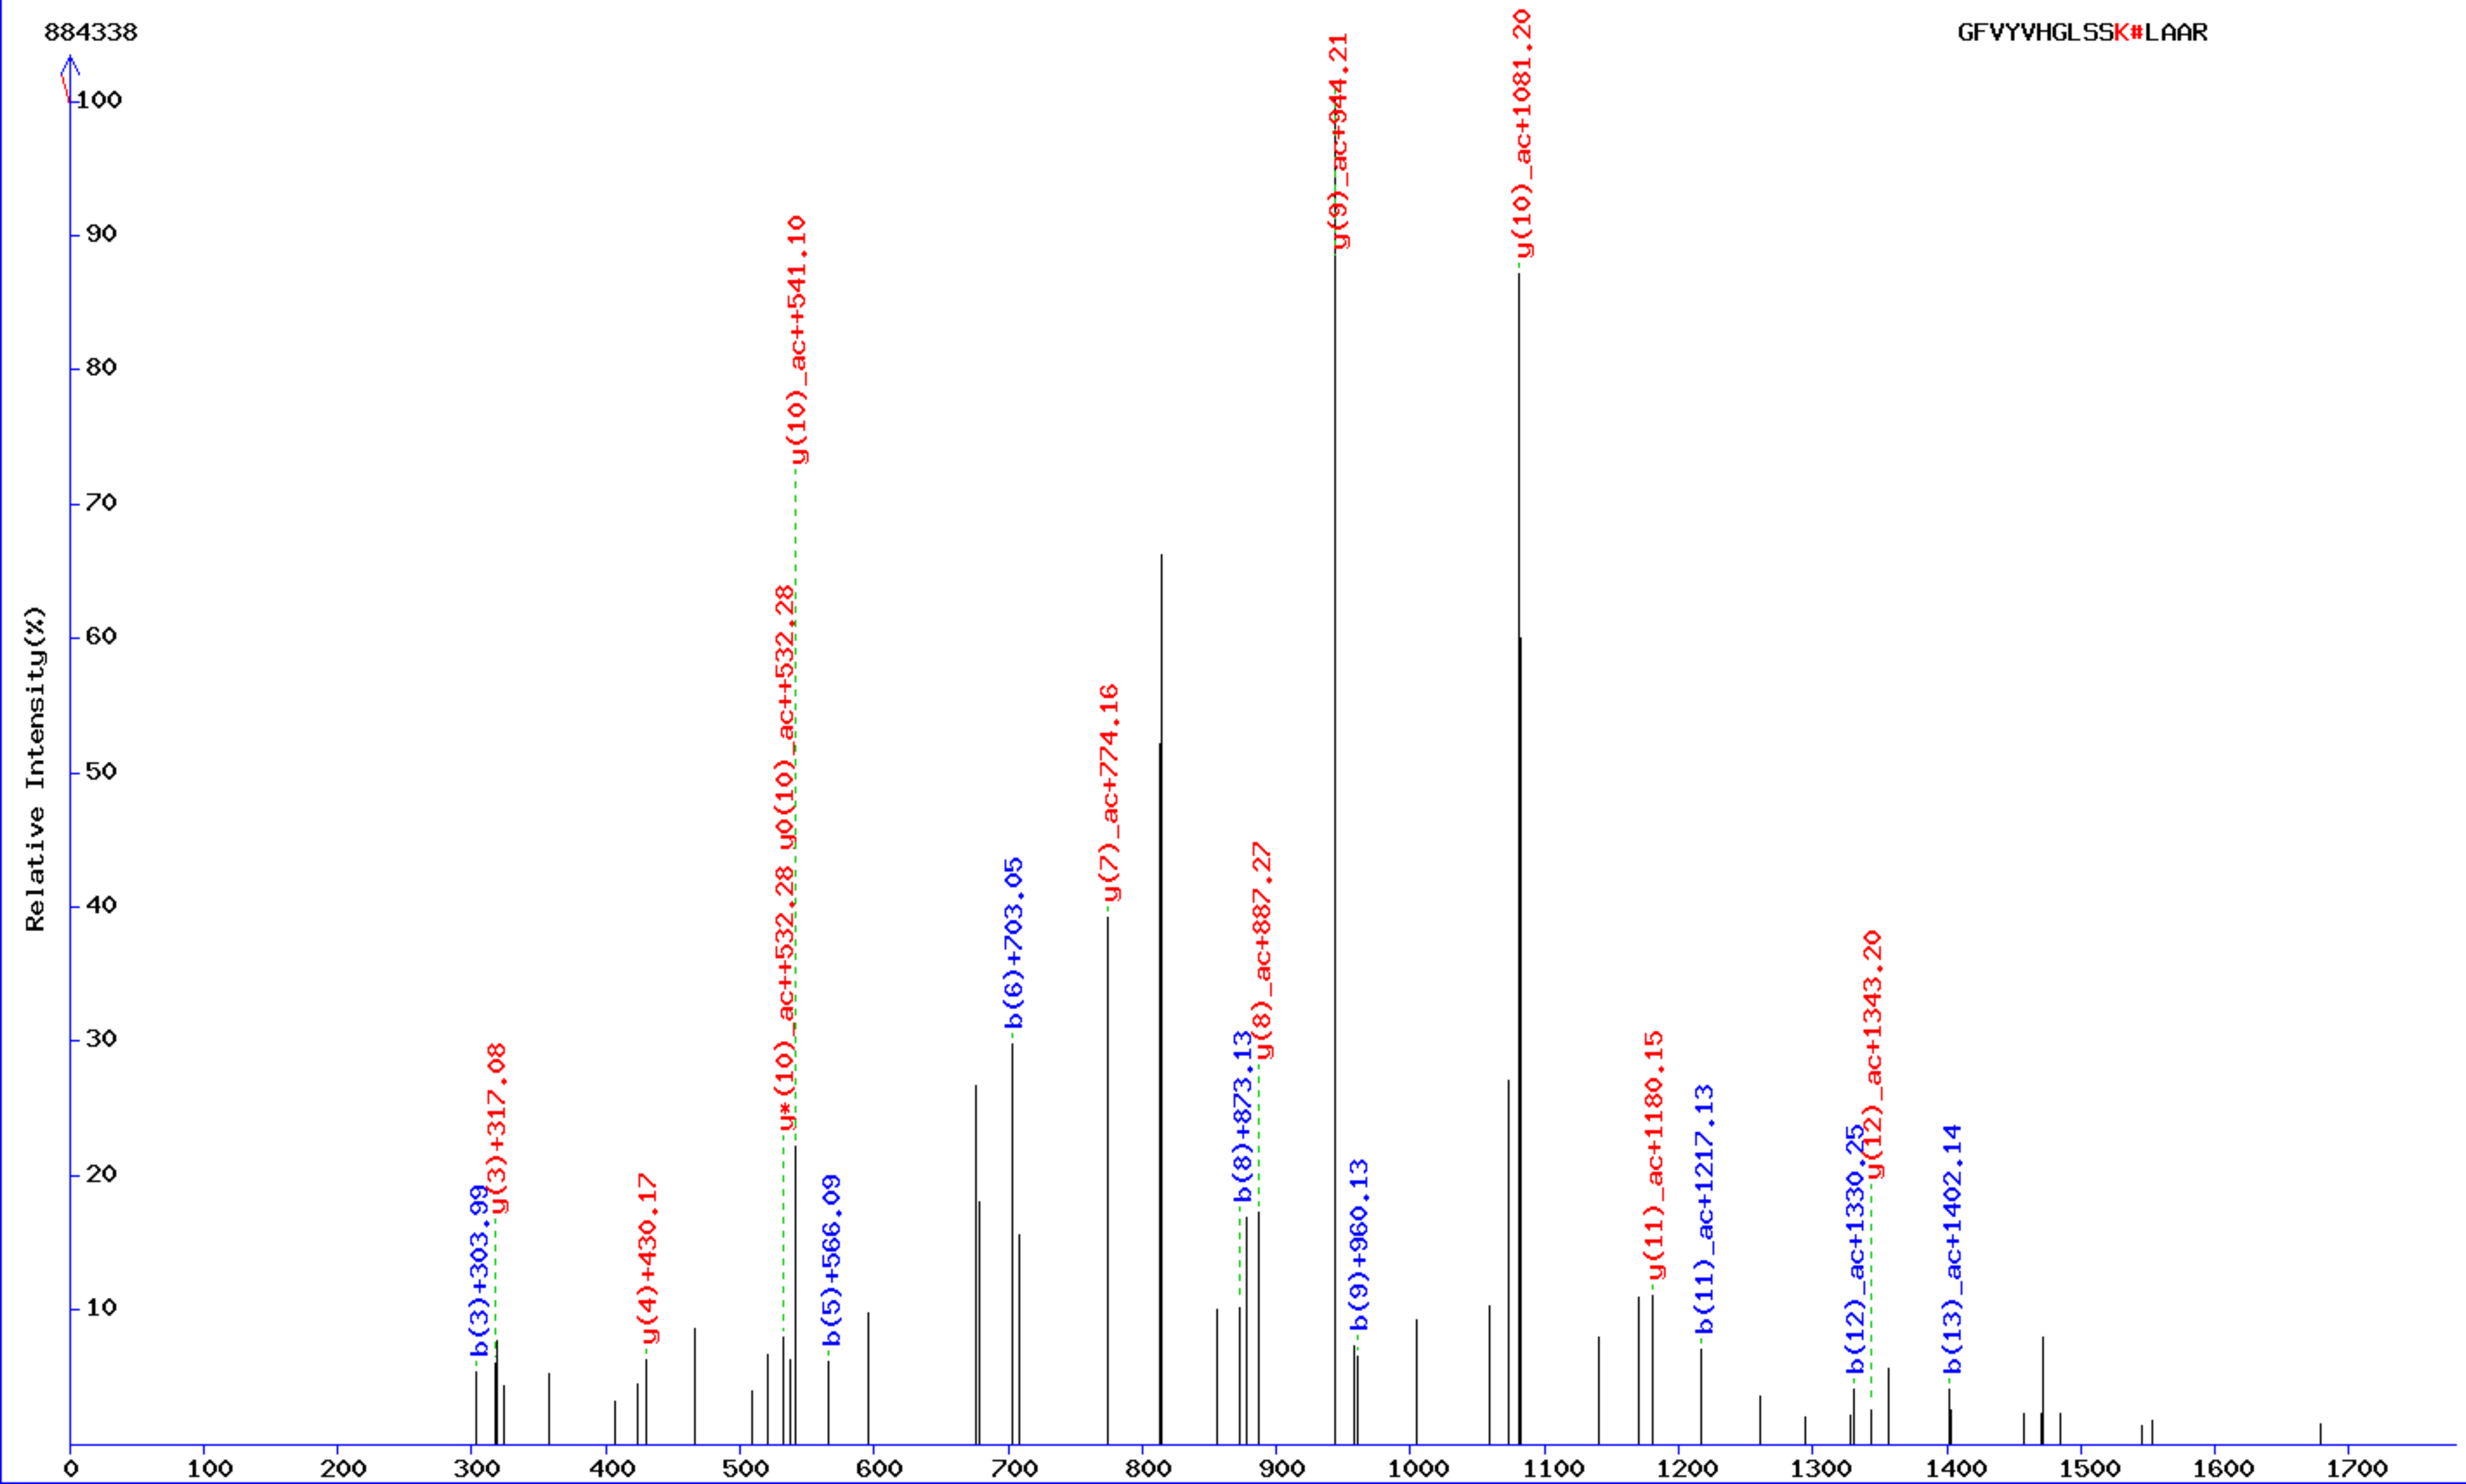

# gi|148662726 MRA\_2907 ribosome recycling factor

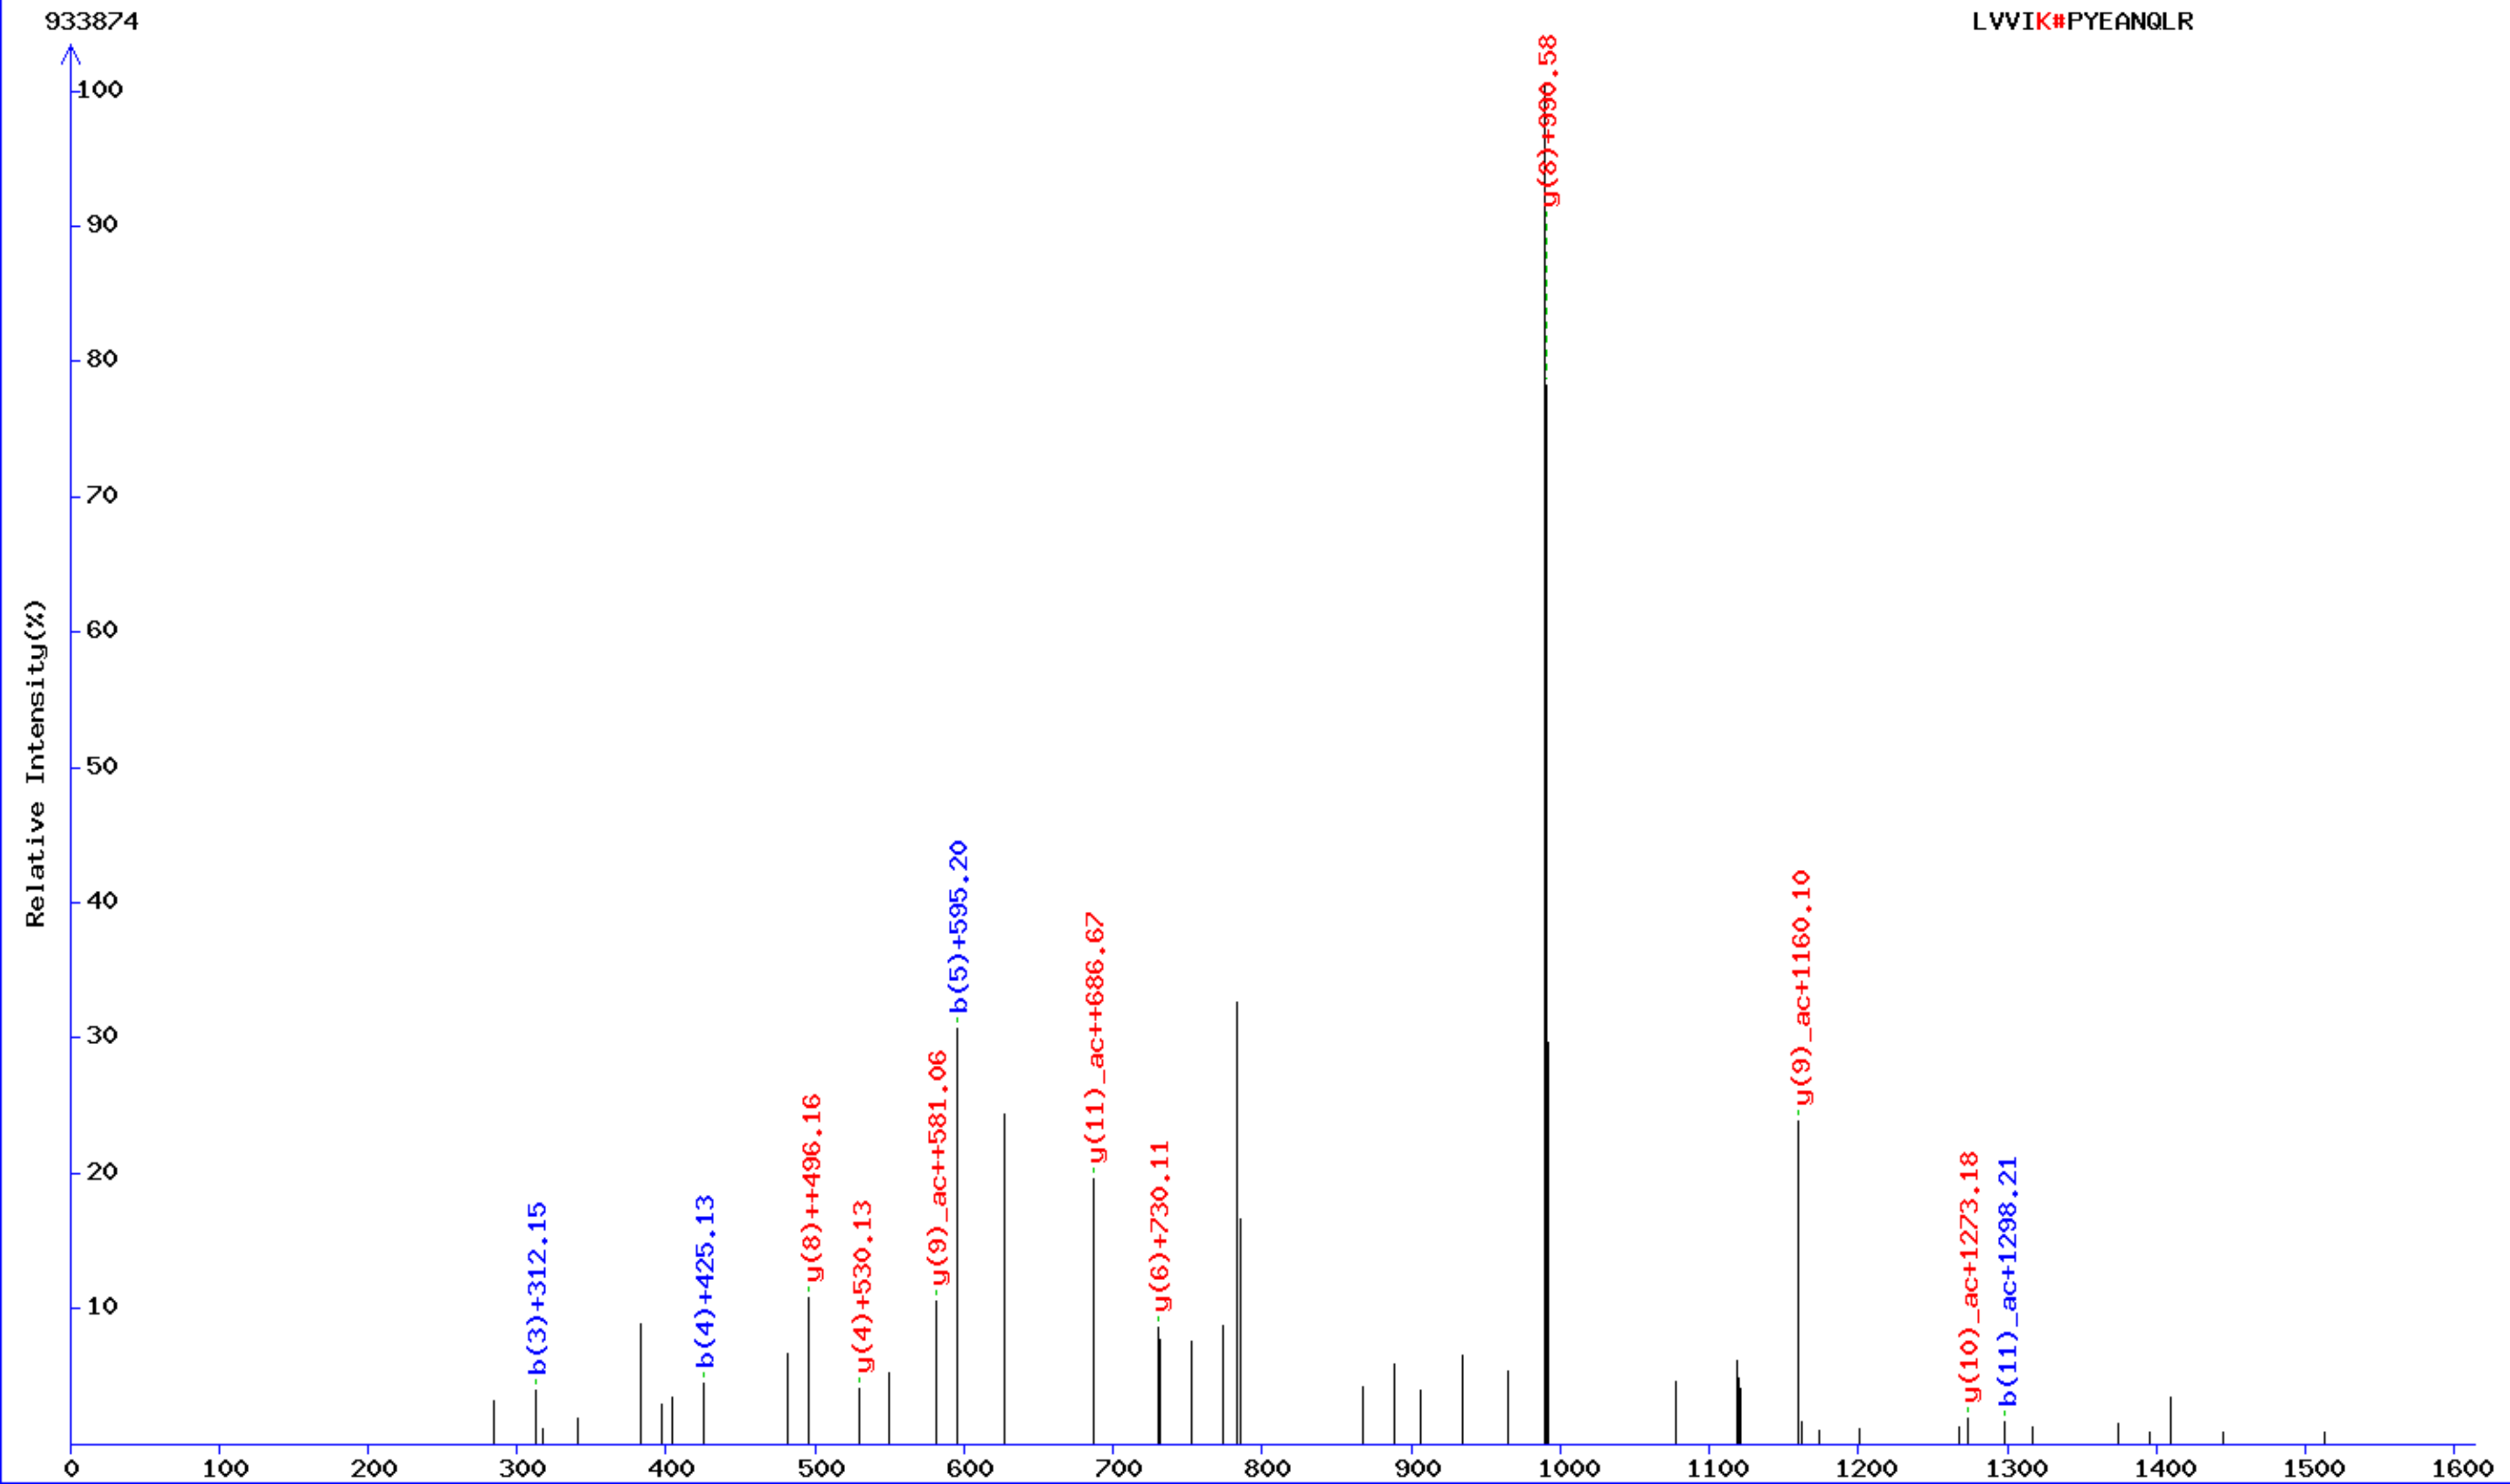



# gi|148660118 MRA\_0361 molecular chaperone DnaJ

GAPSGDL YVTVHVRPDK#IFGR

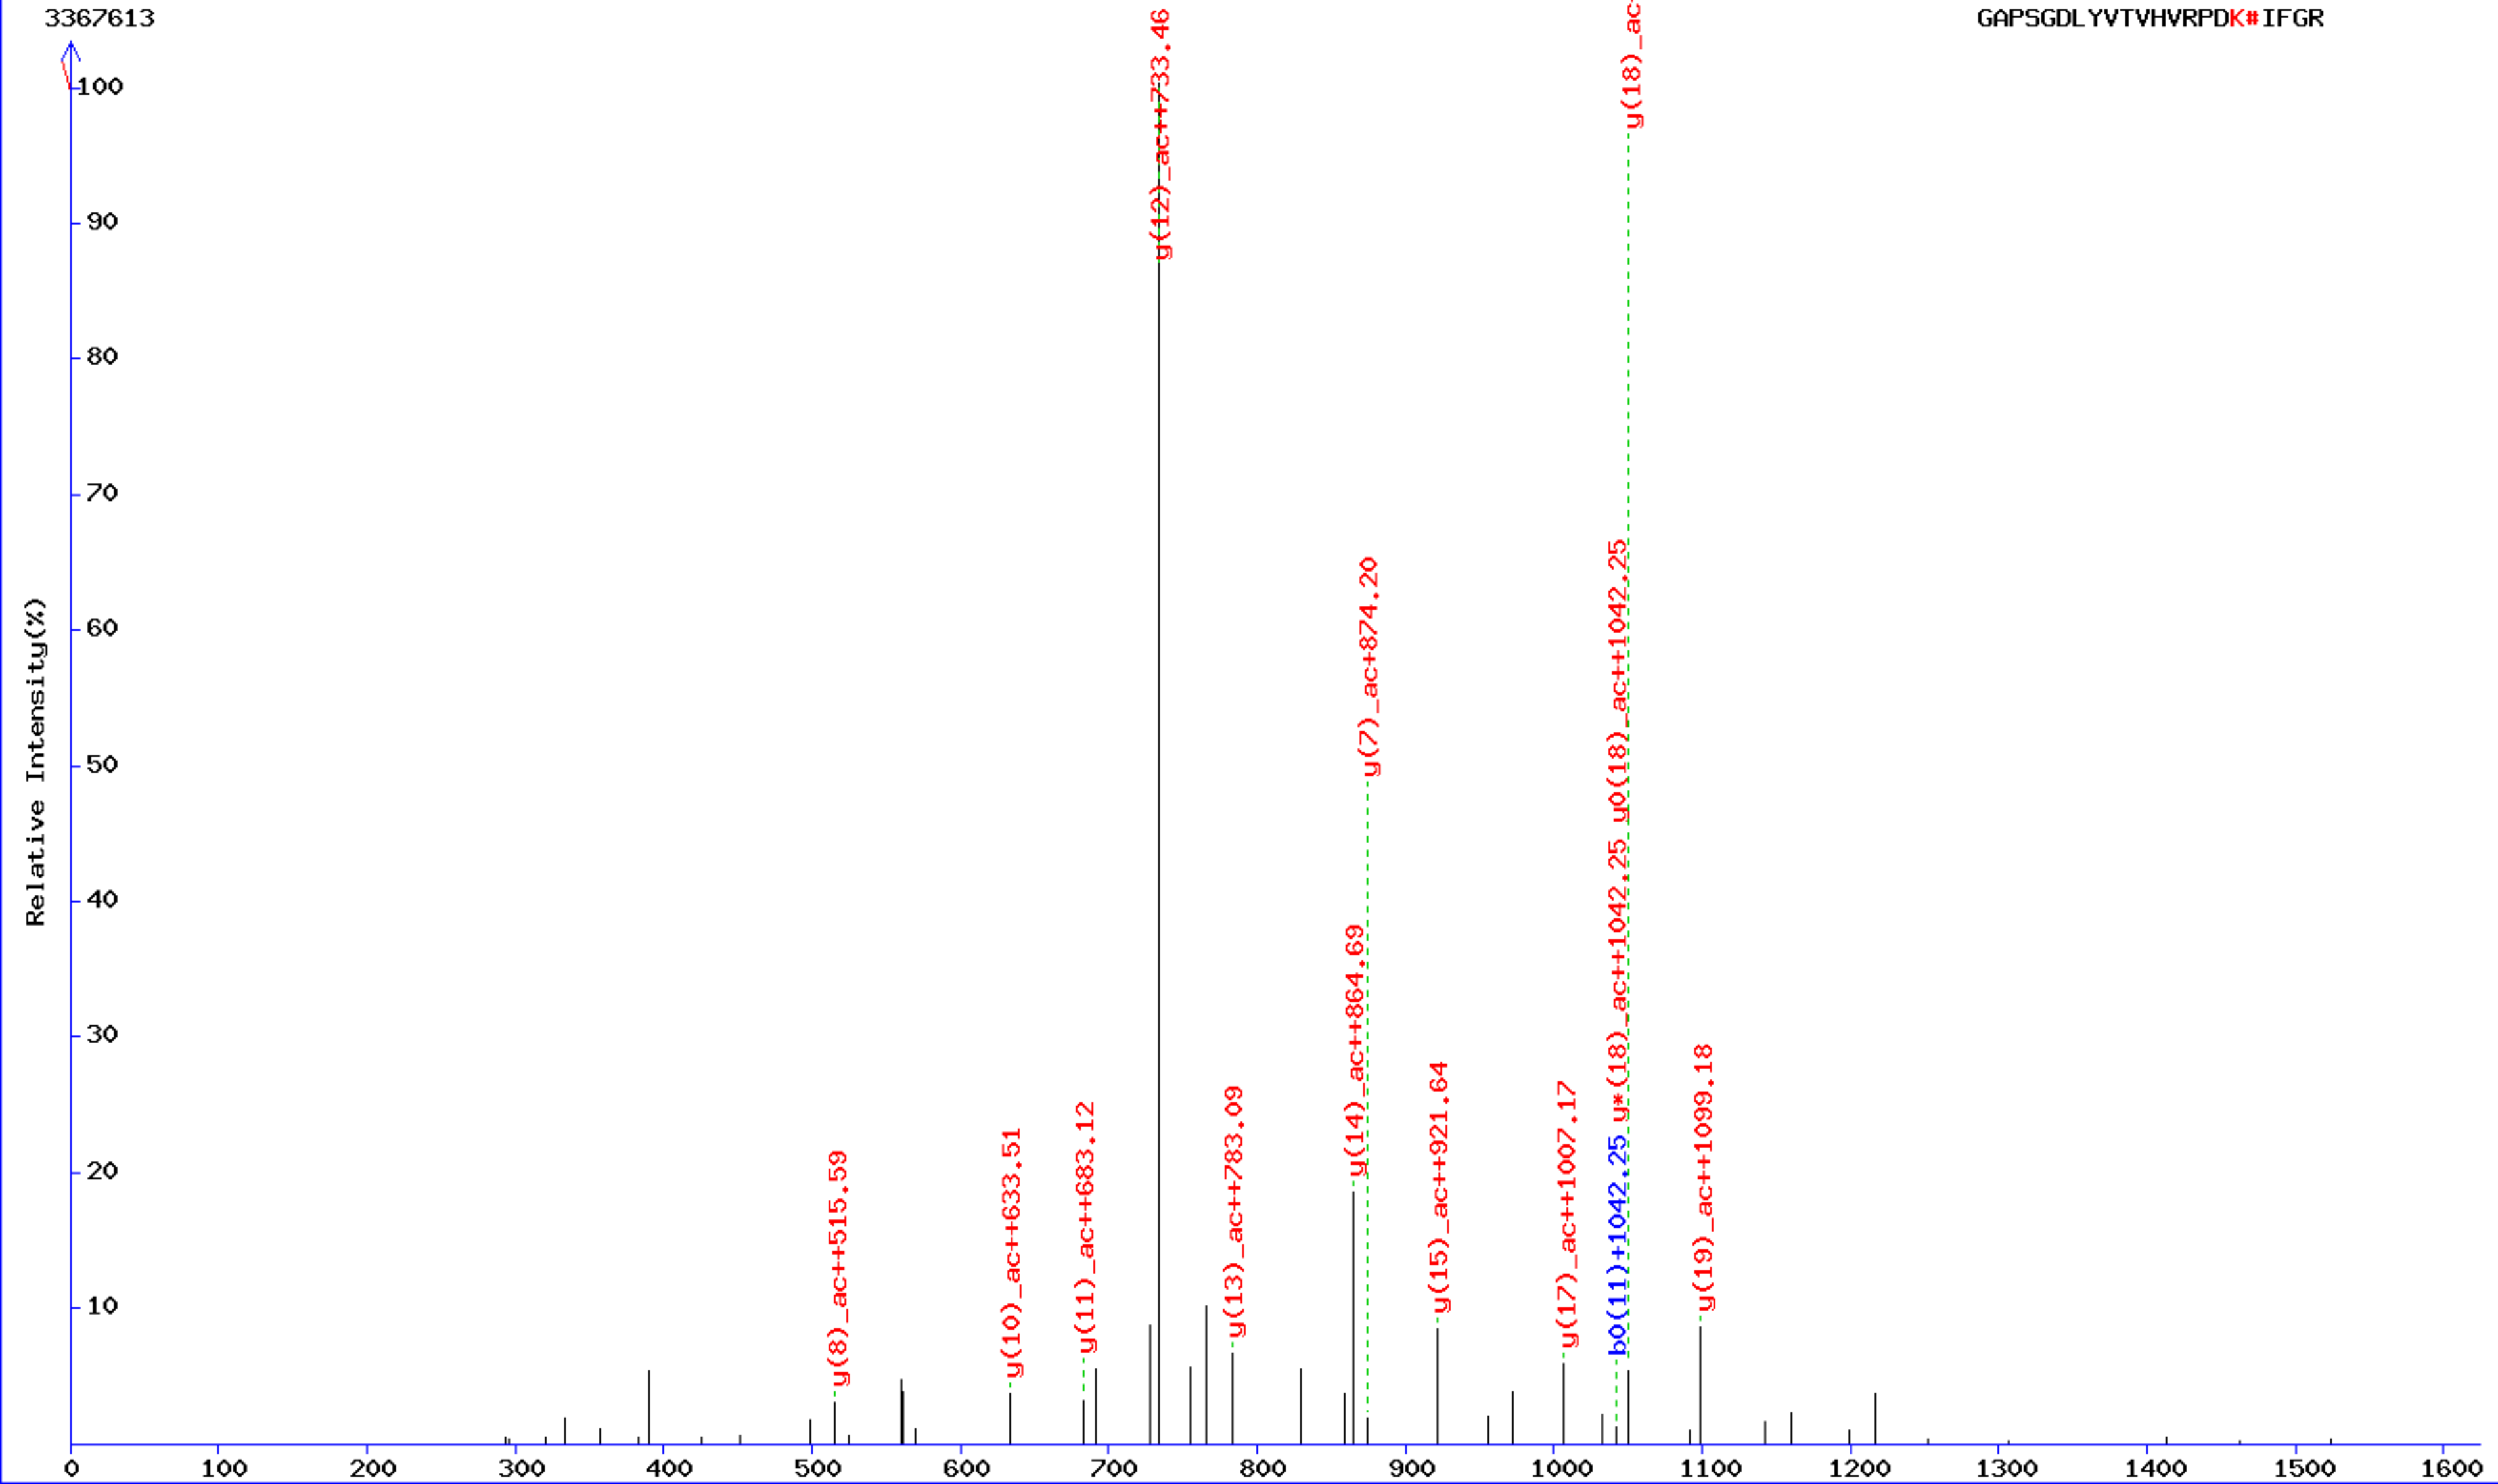

# gi|148663419 MRA\_3595 acetyl-CoA acetyltransferase

GSELI A EK#WNL SR

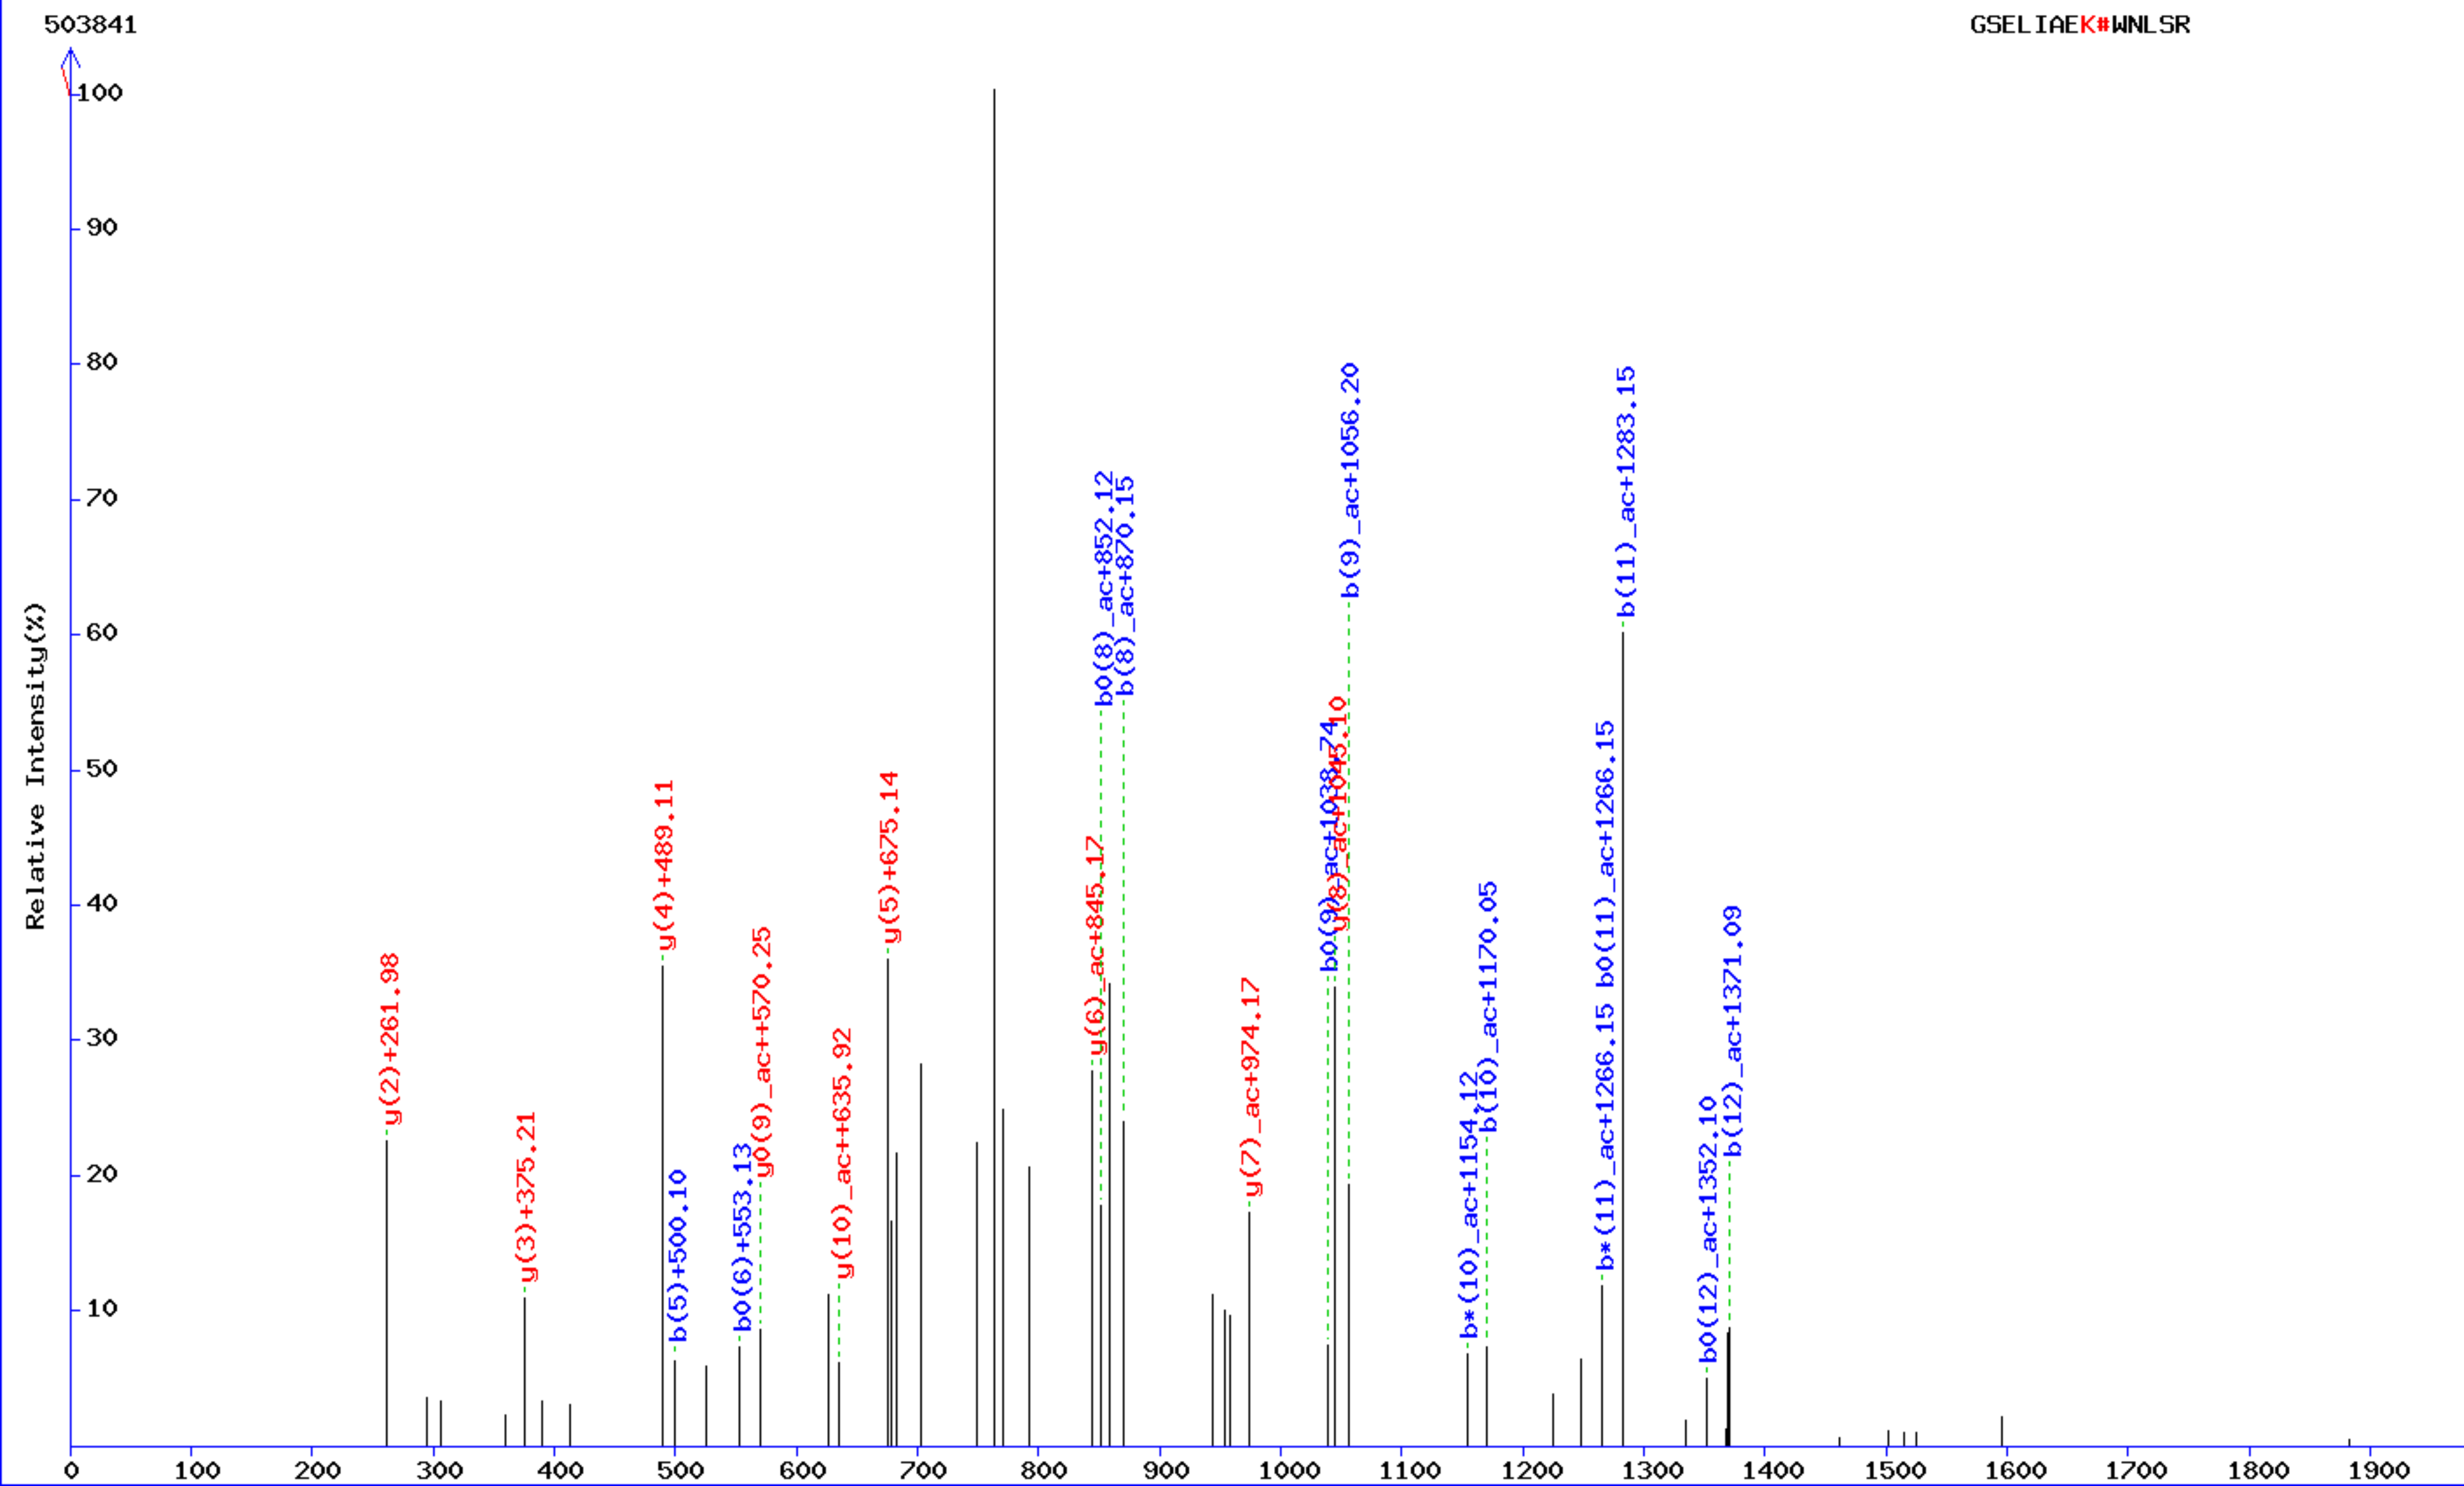

gi|148660602 MRA\_0834 fatty acid desaturase

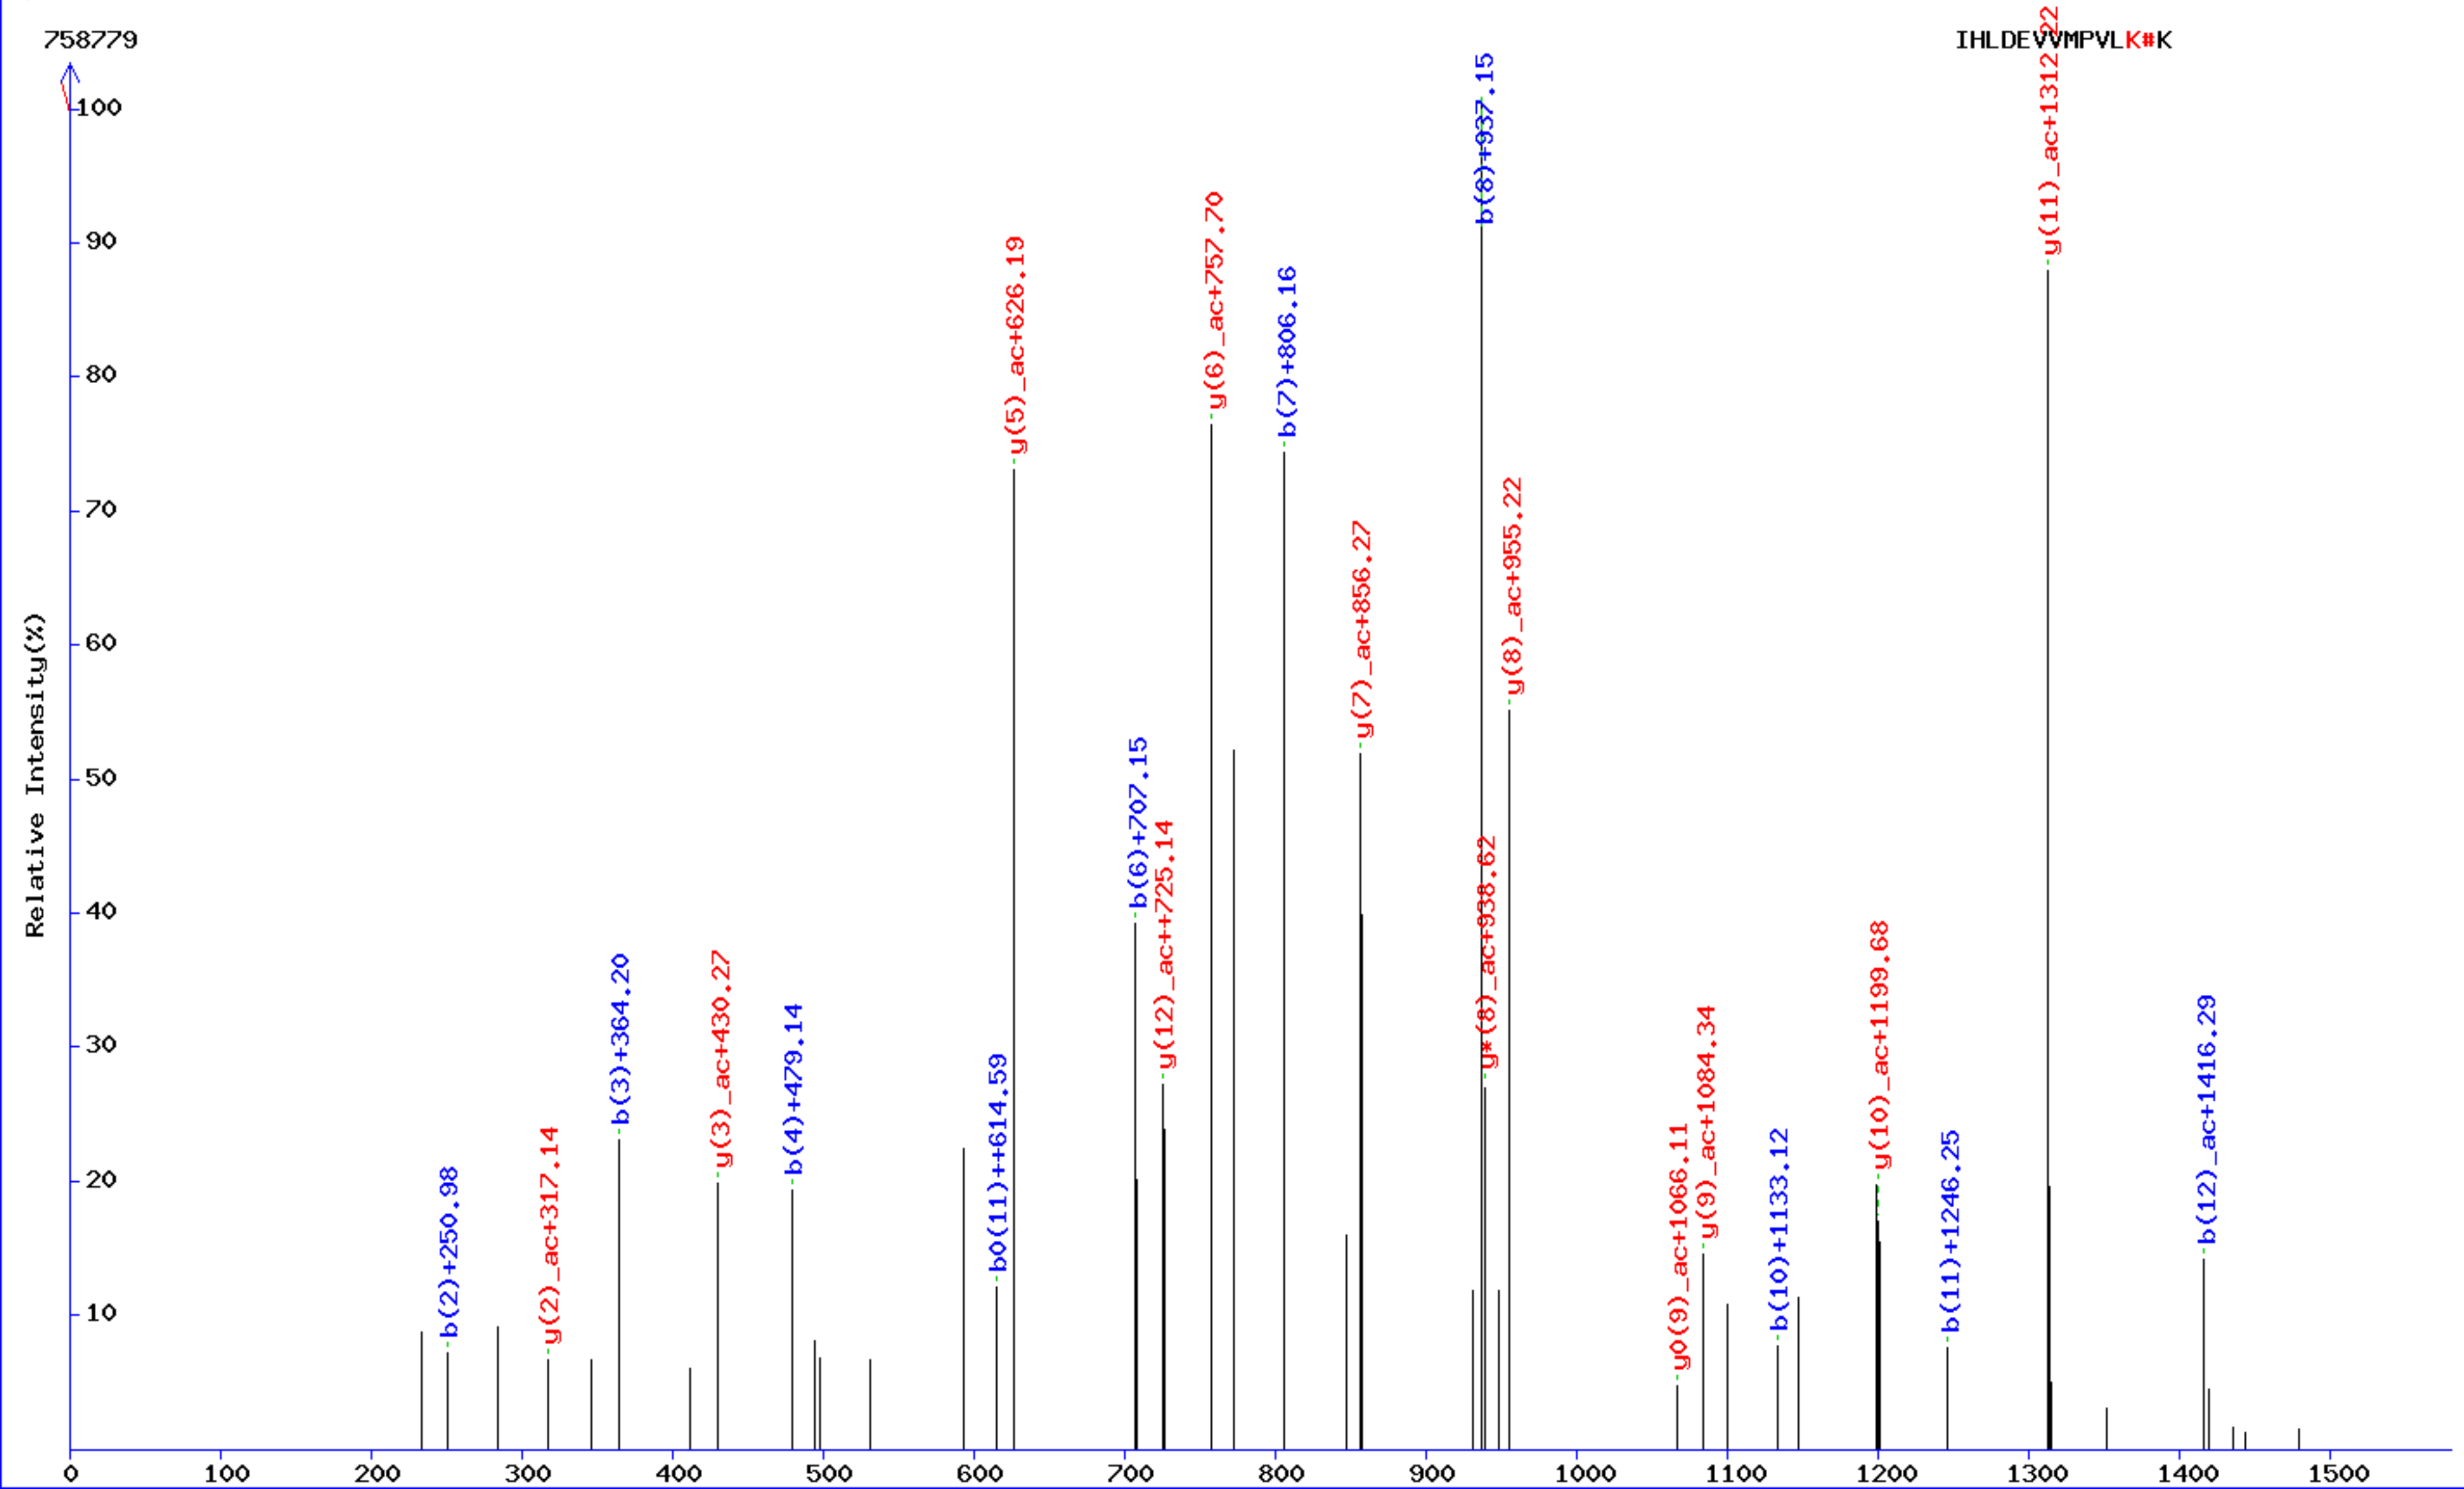

# gi|148660129 MRA\_0372 fructose-bisphosphate aldolase

YLLAATFGNVHGVYKPGNVK#

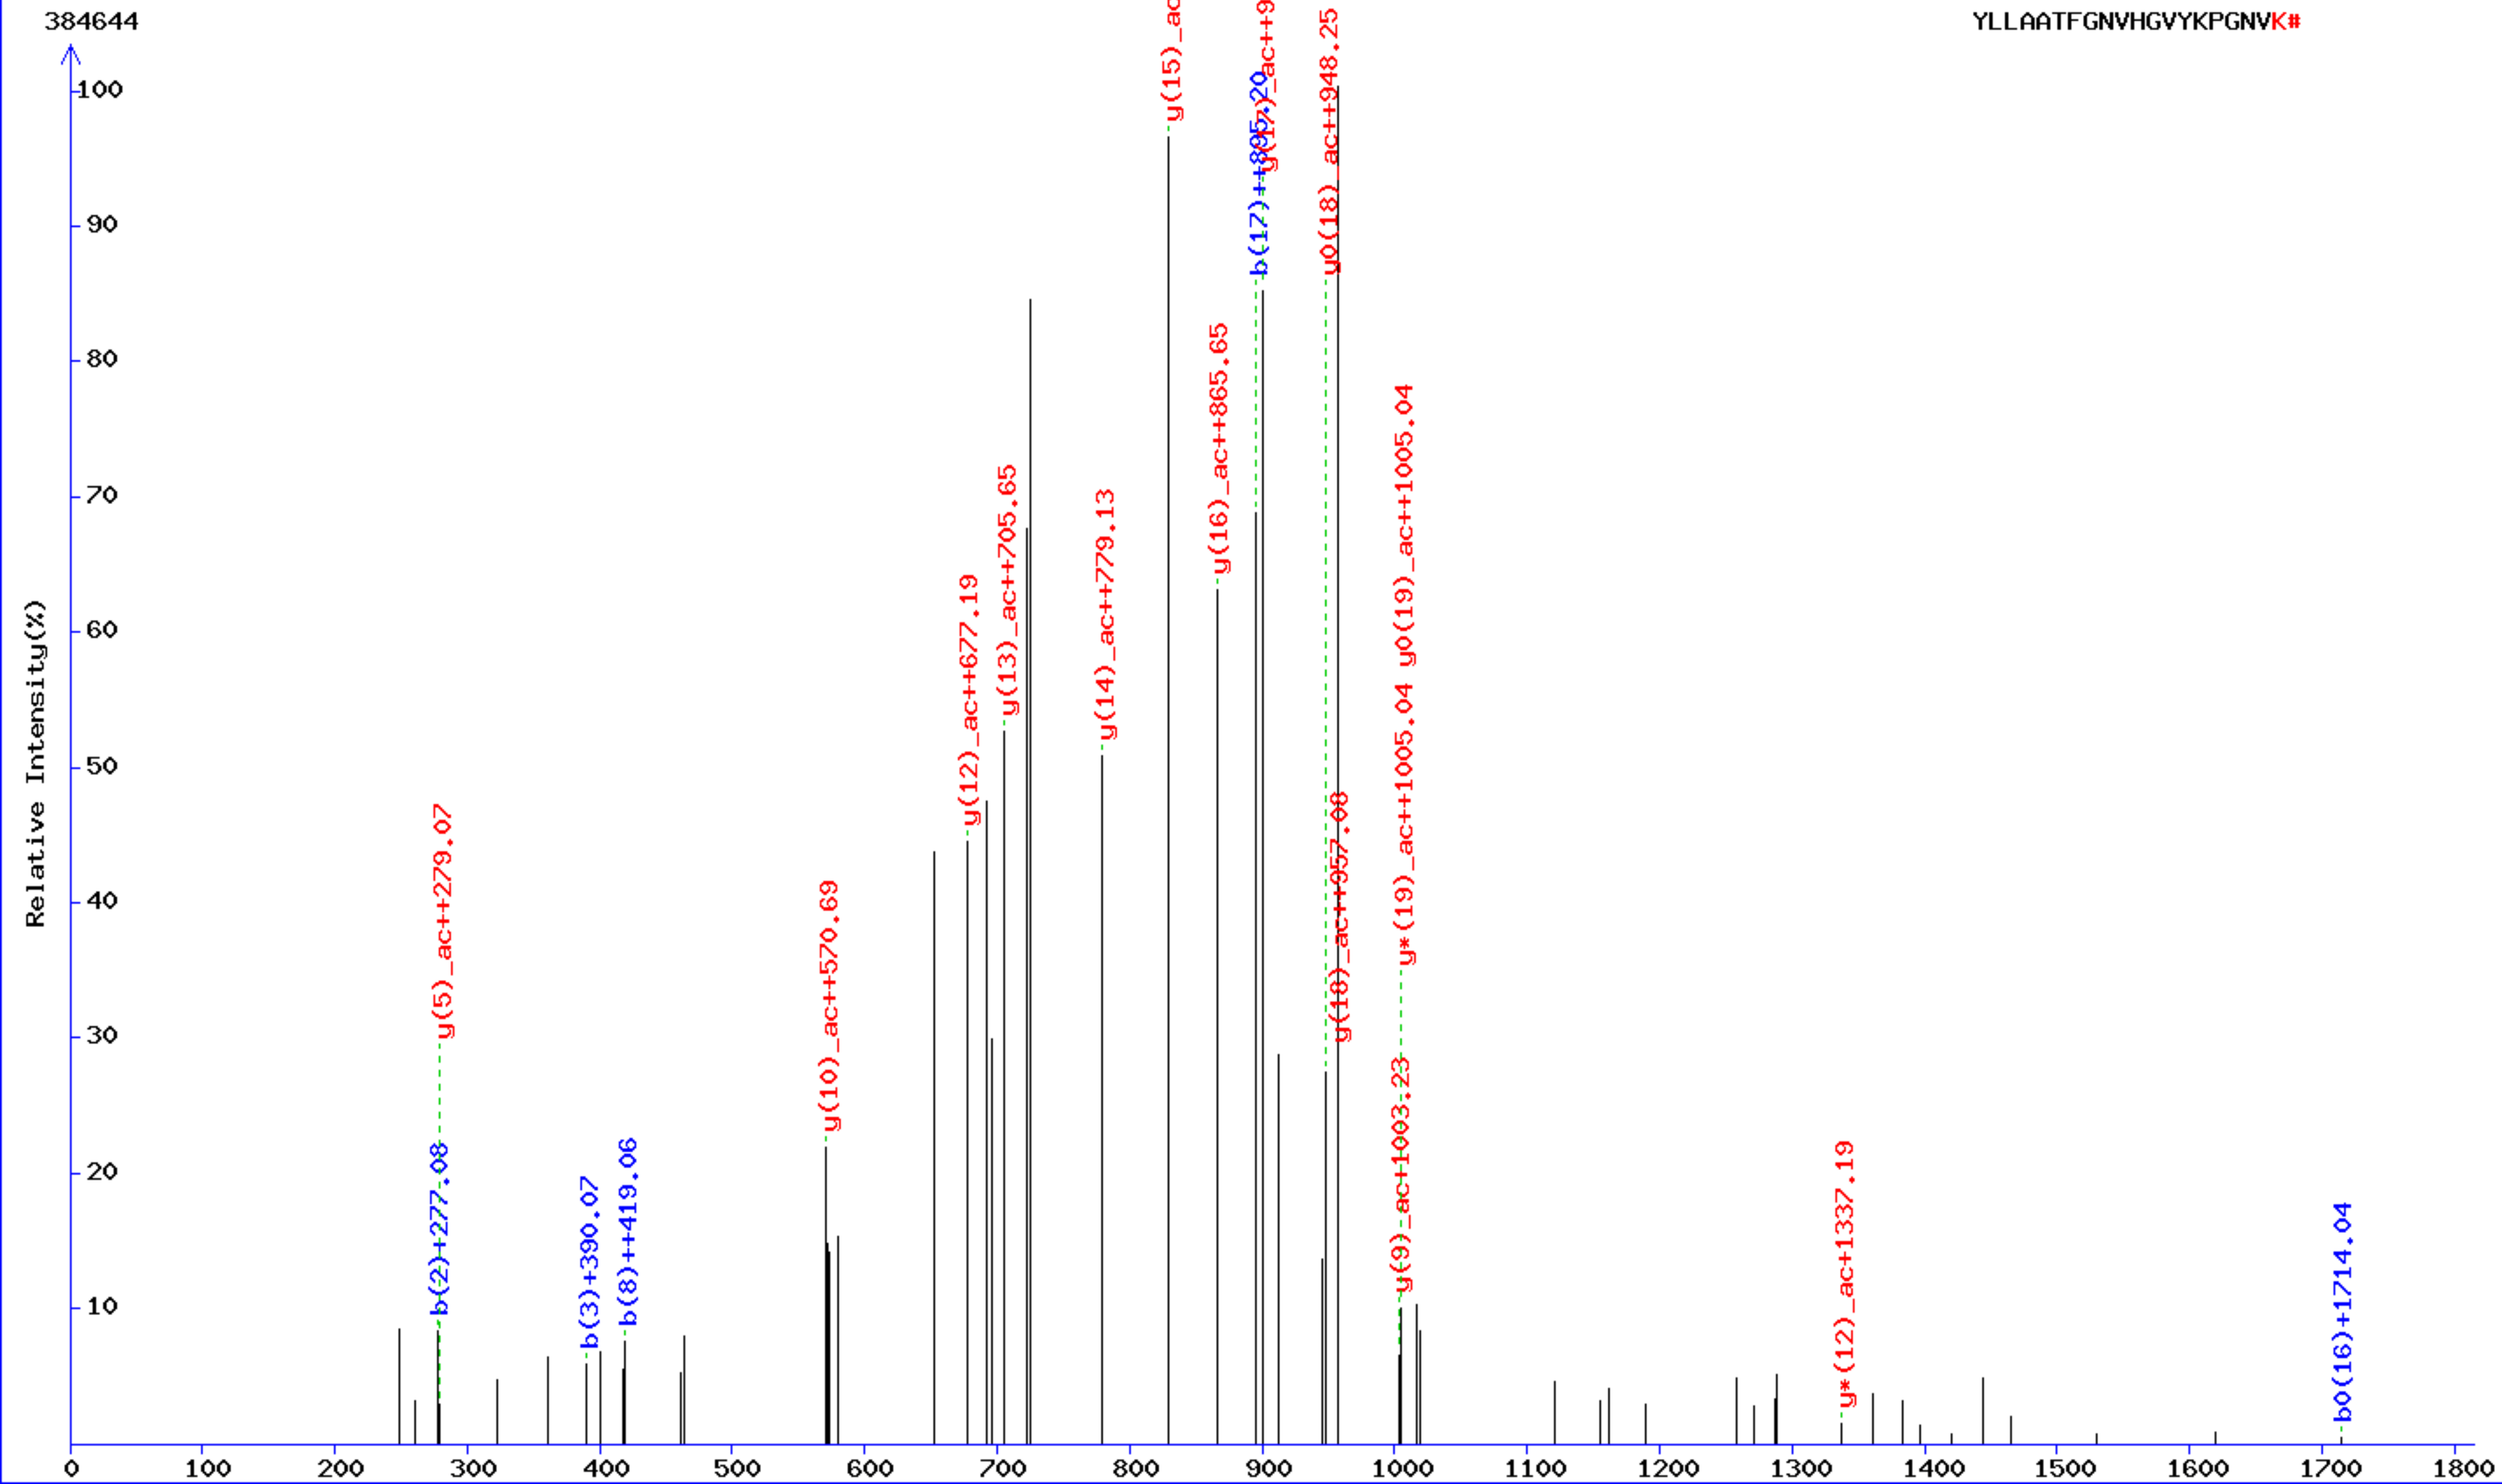

gi|148662734 MRA\_2915 30S ribosomal protein S2

AVVTMK#QLLDSGTHFGHQTR

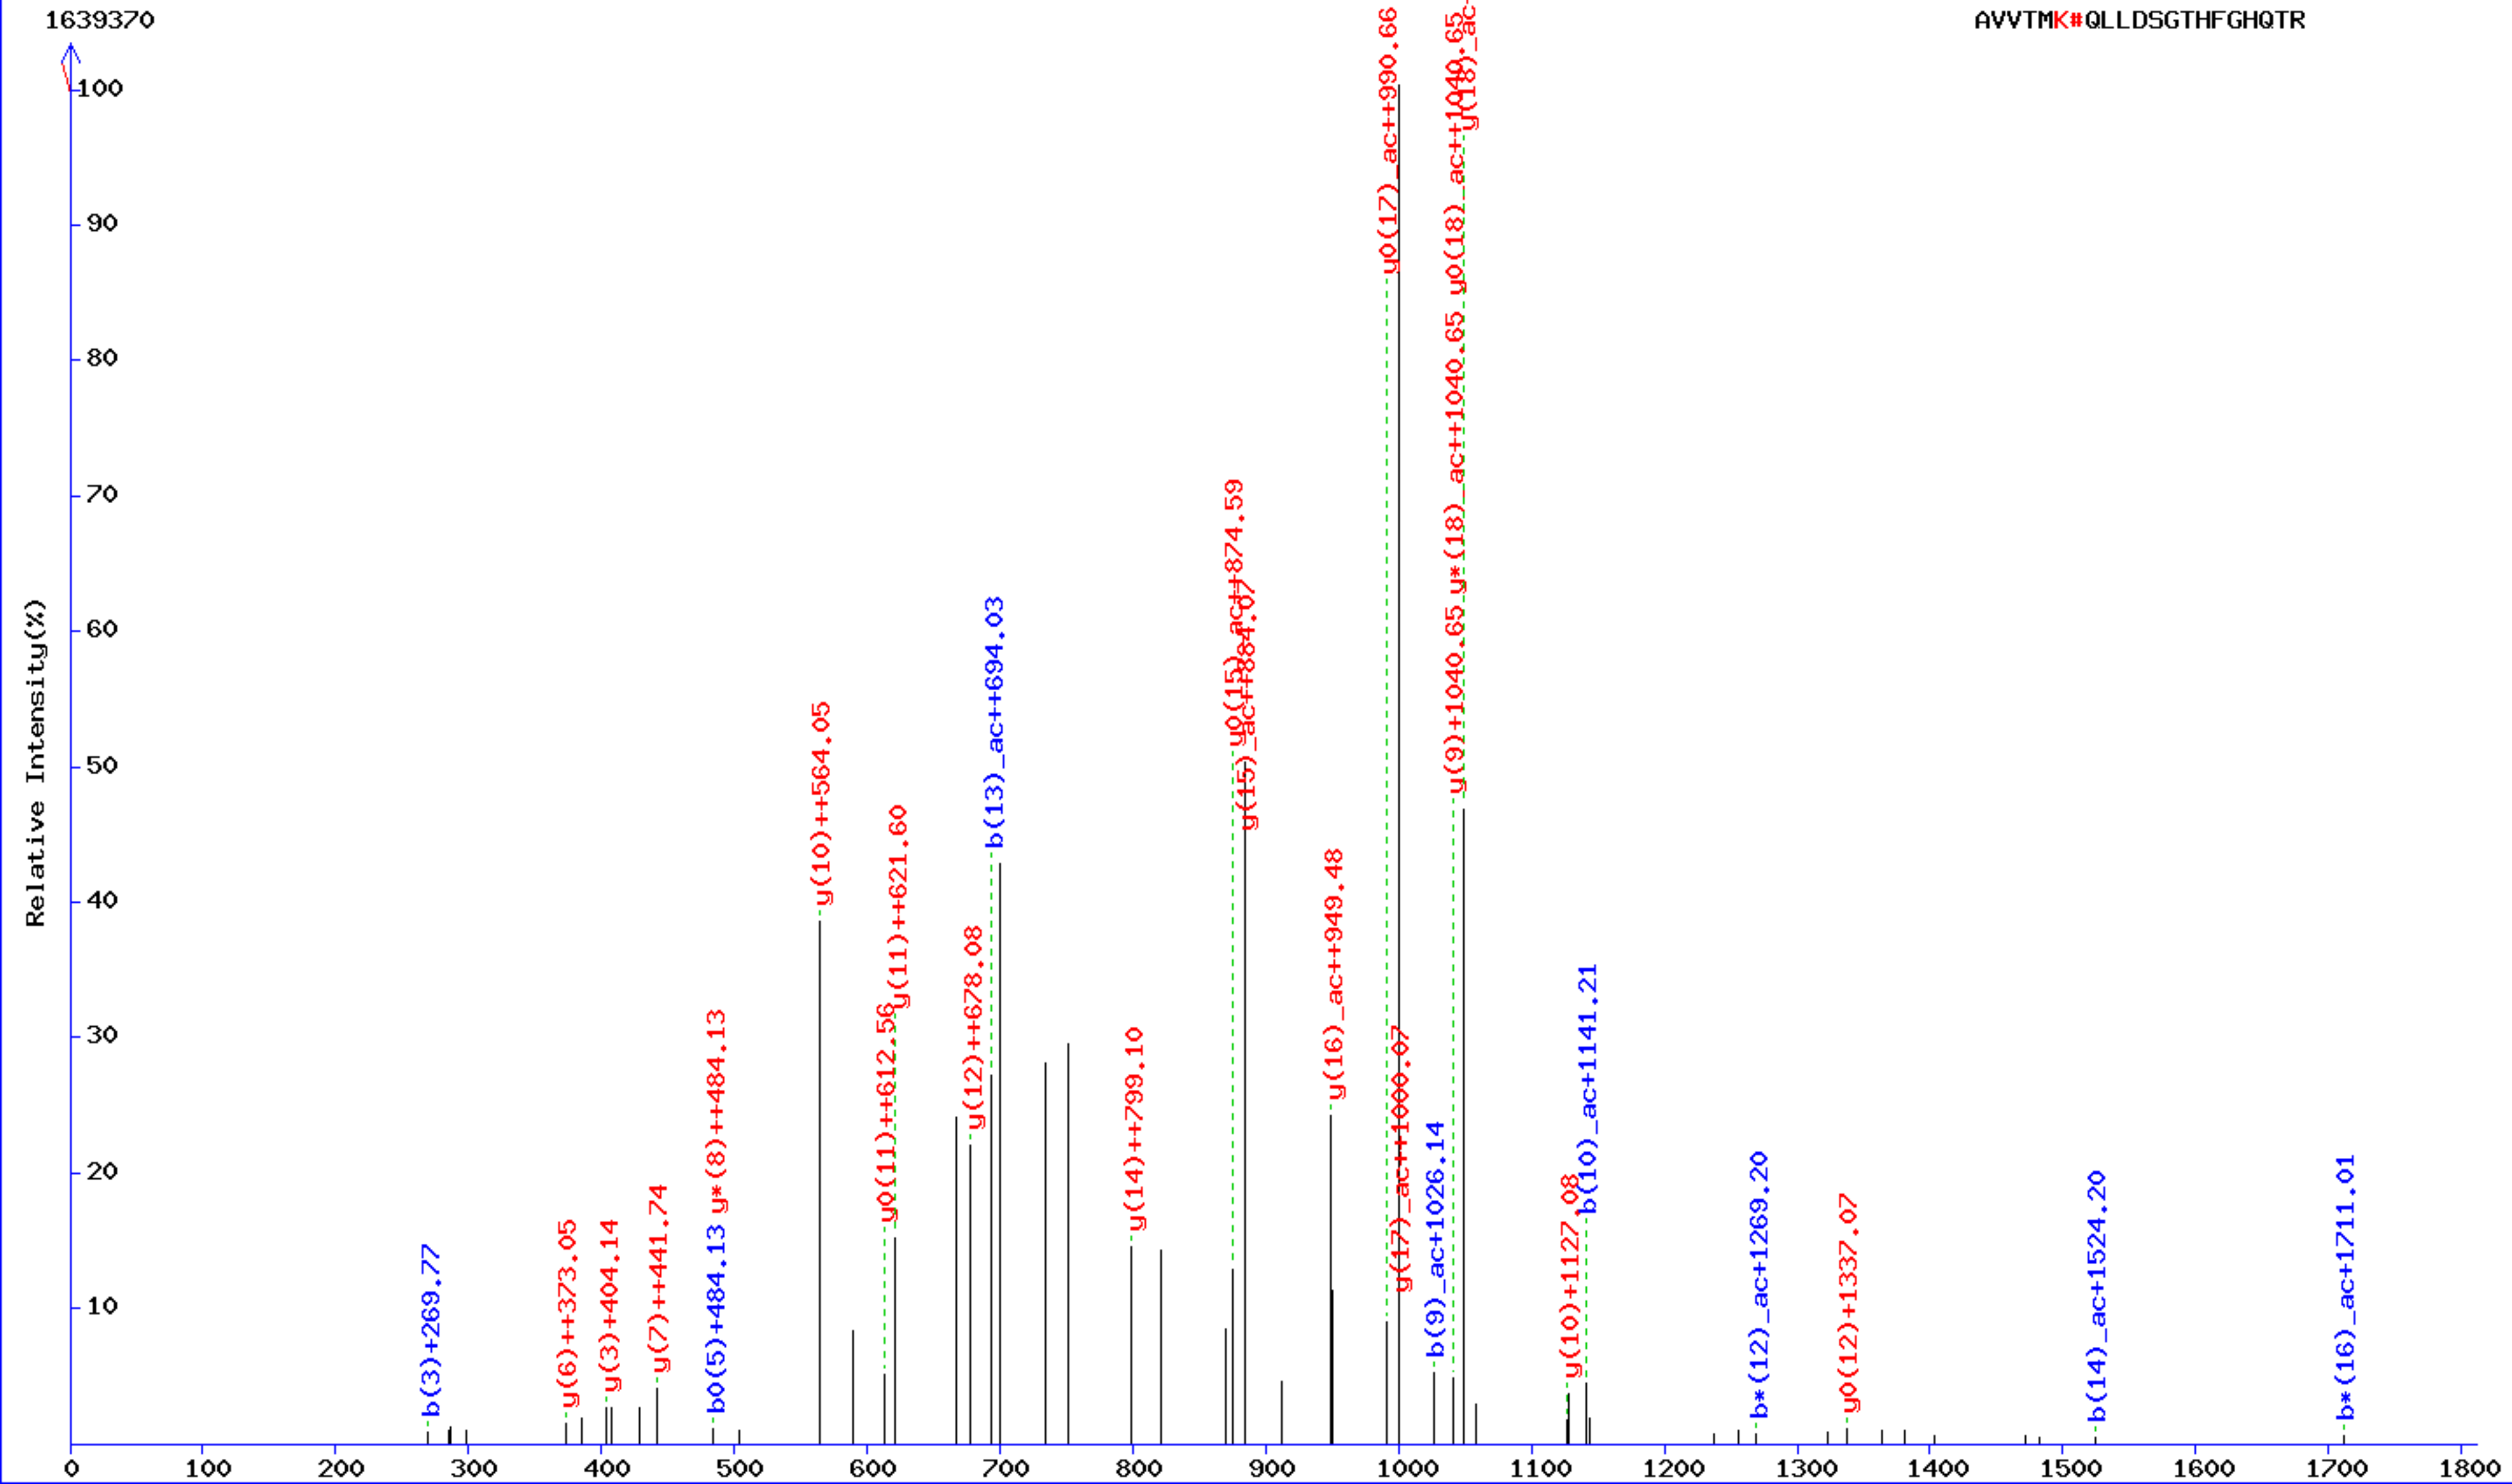

# gi|148661112 MRA\_1331 acetyl-CoA acetyltransferase

ANTTAAALAGLK#PAFR

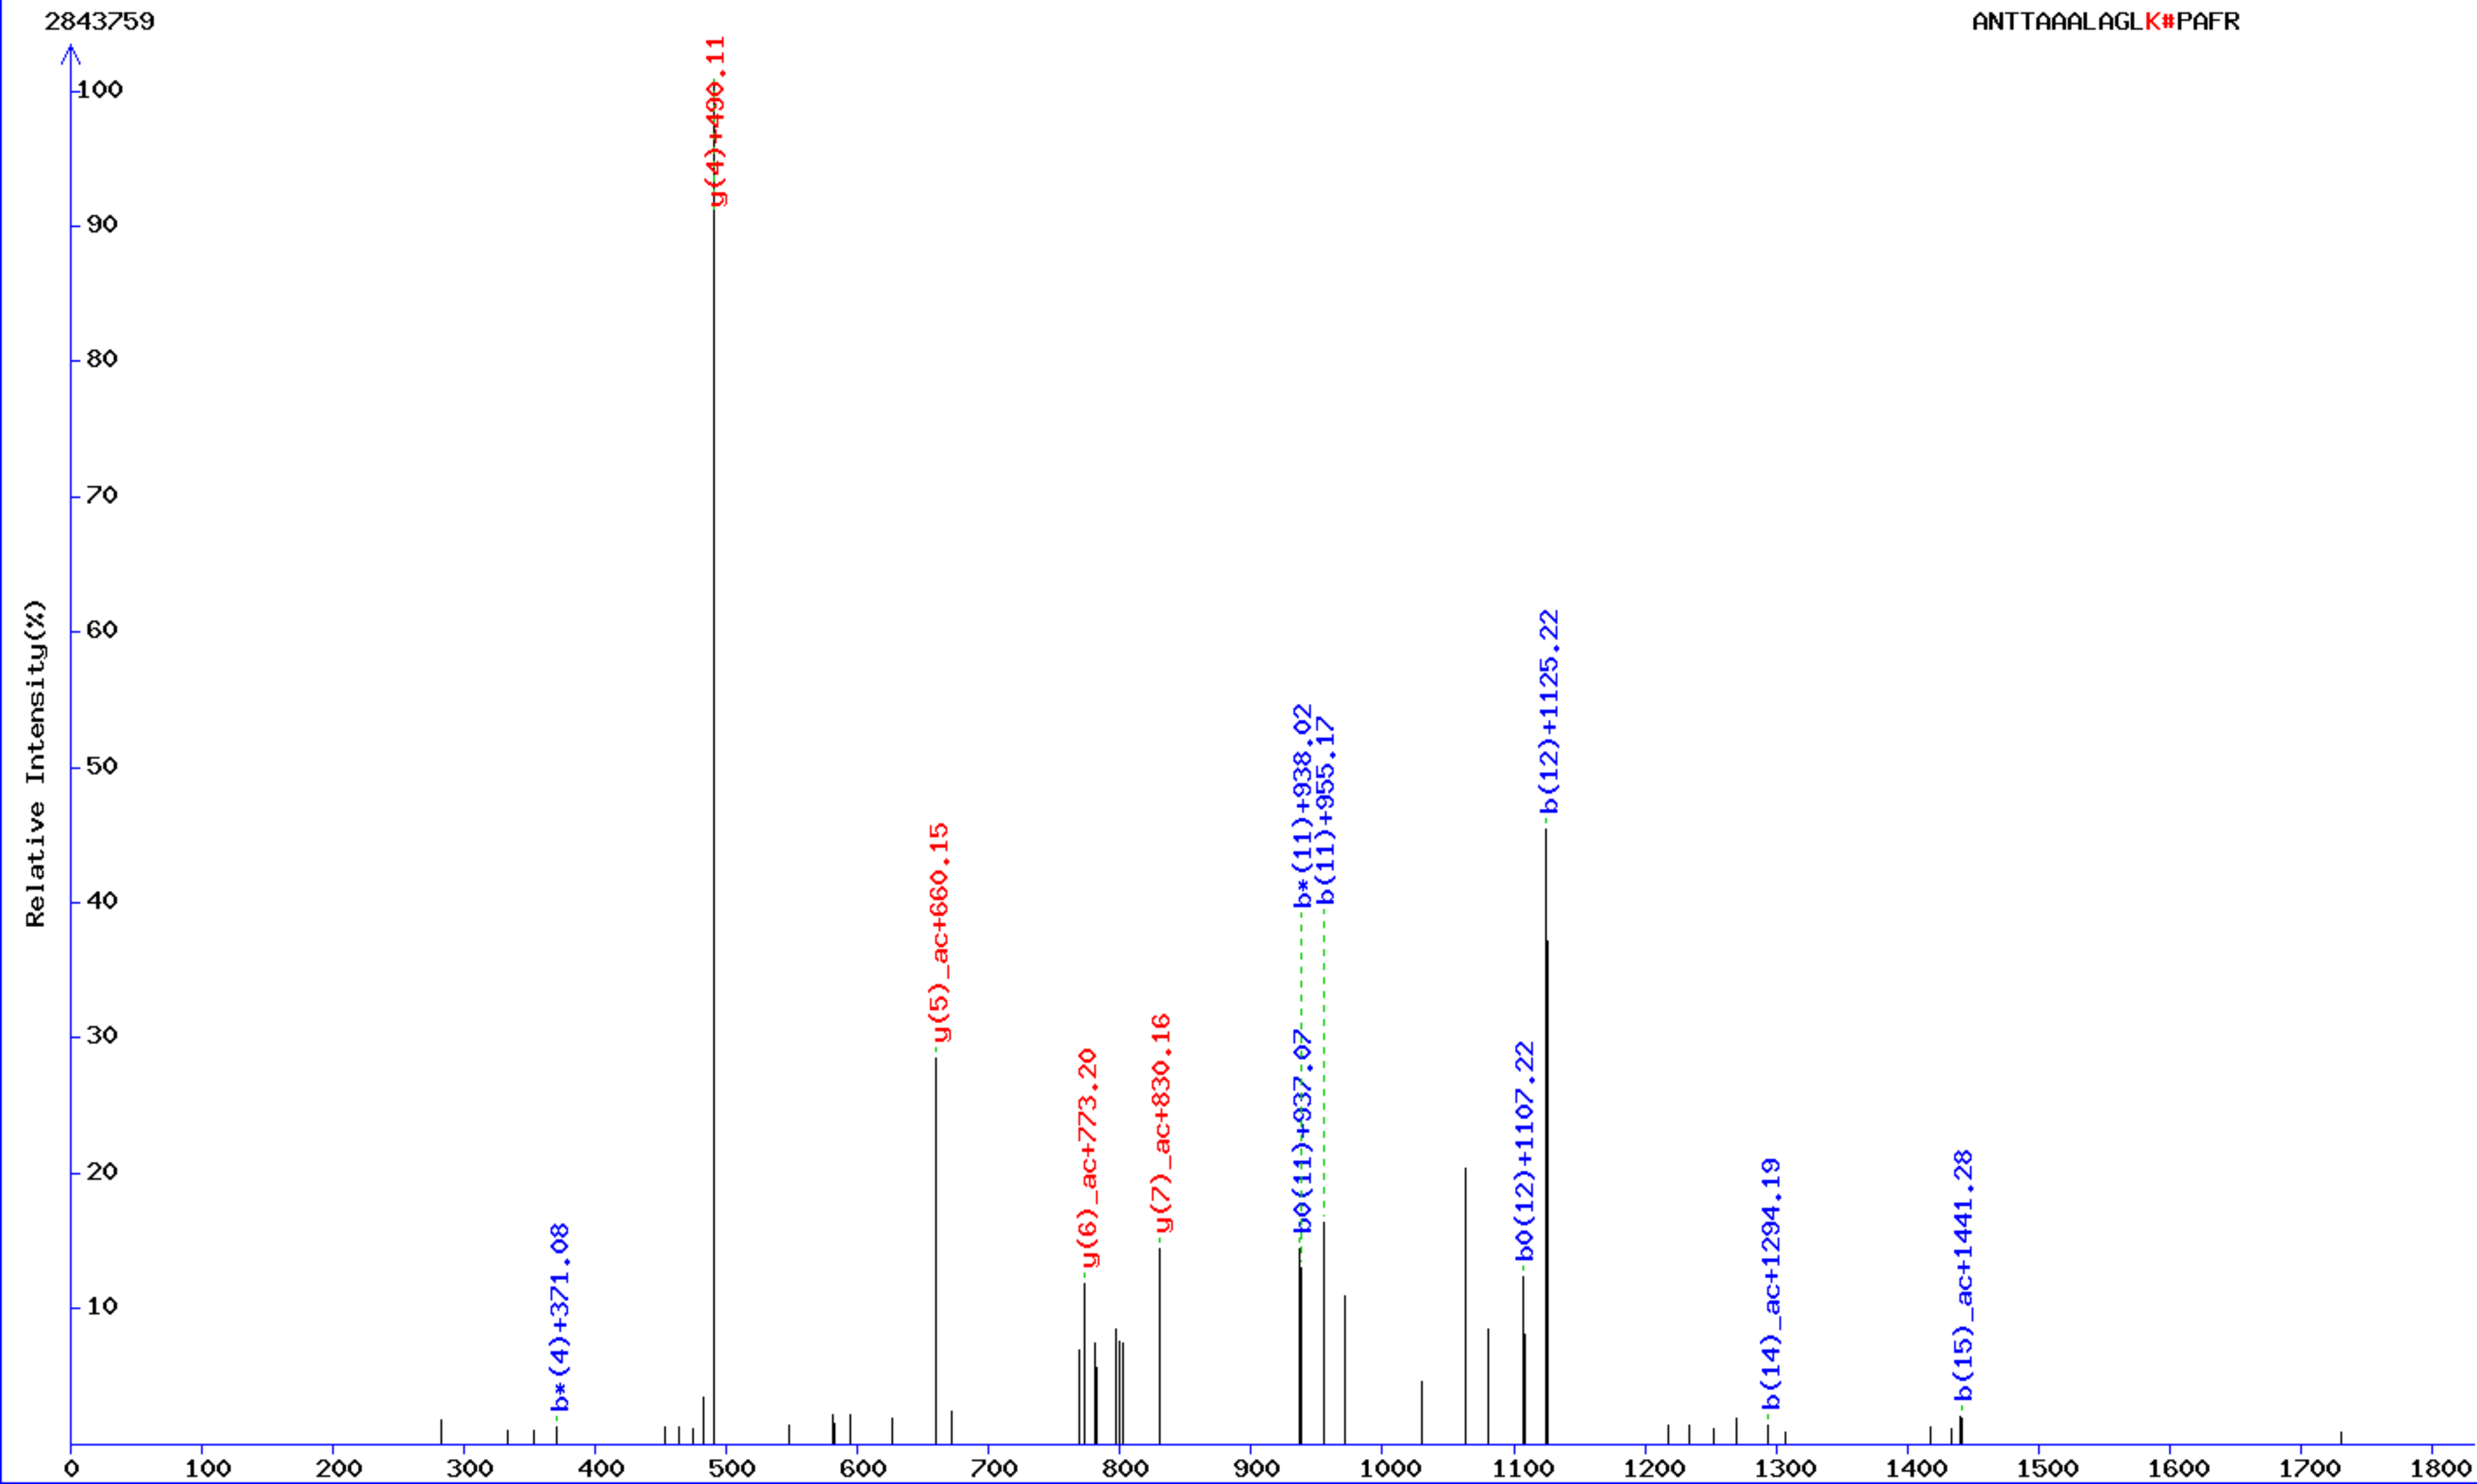

# gi|148661113 MRA\_1332 thioredoxin-related protein

GK#WSLASVNVDPVAPR

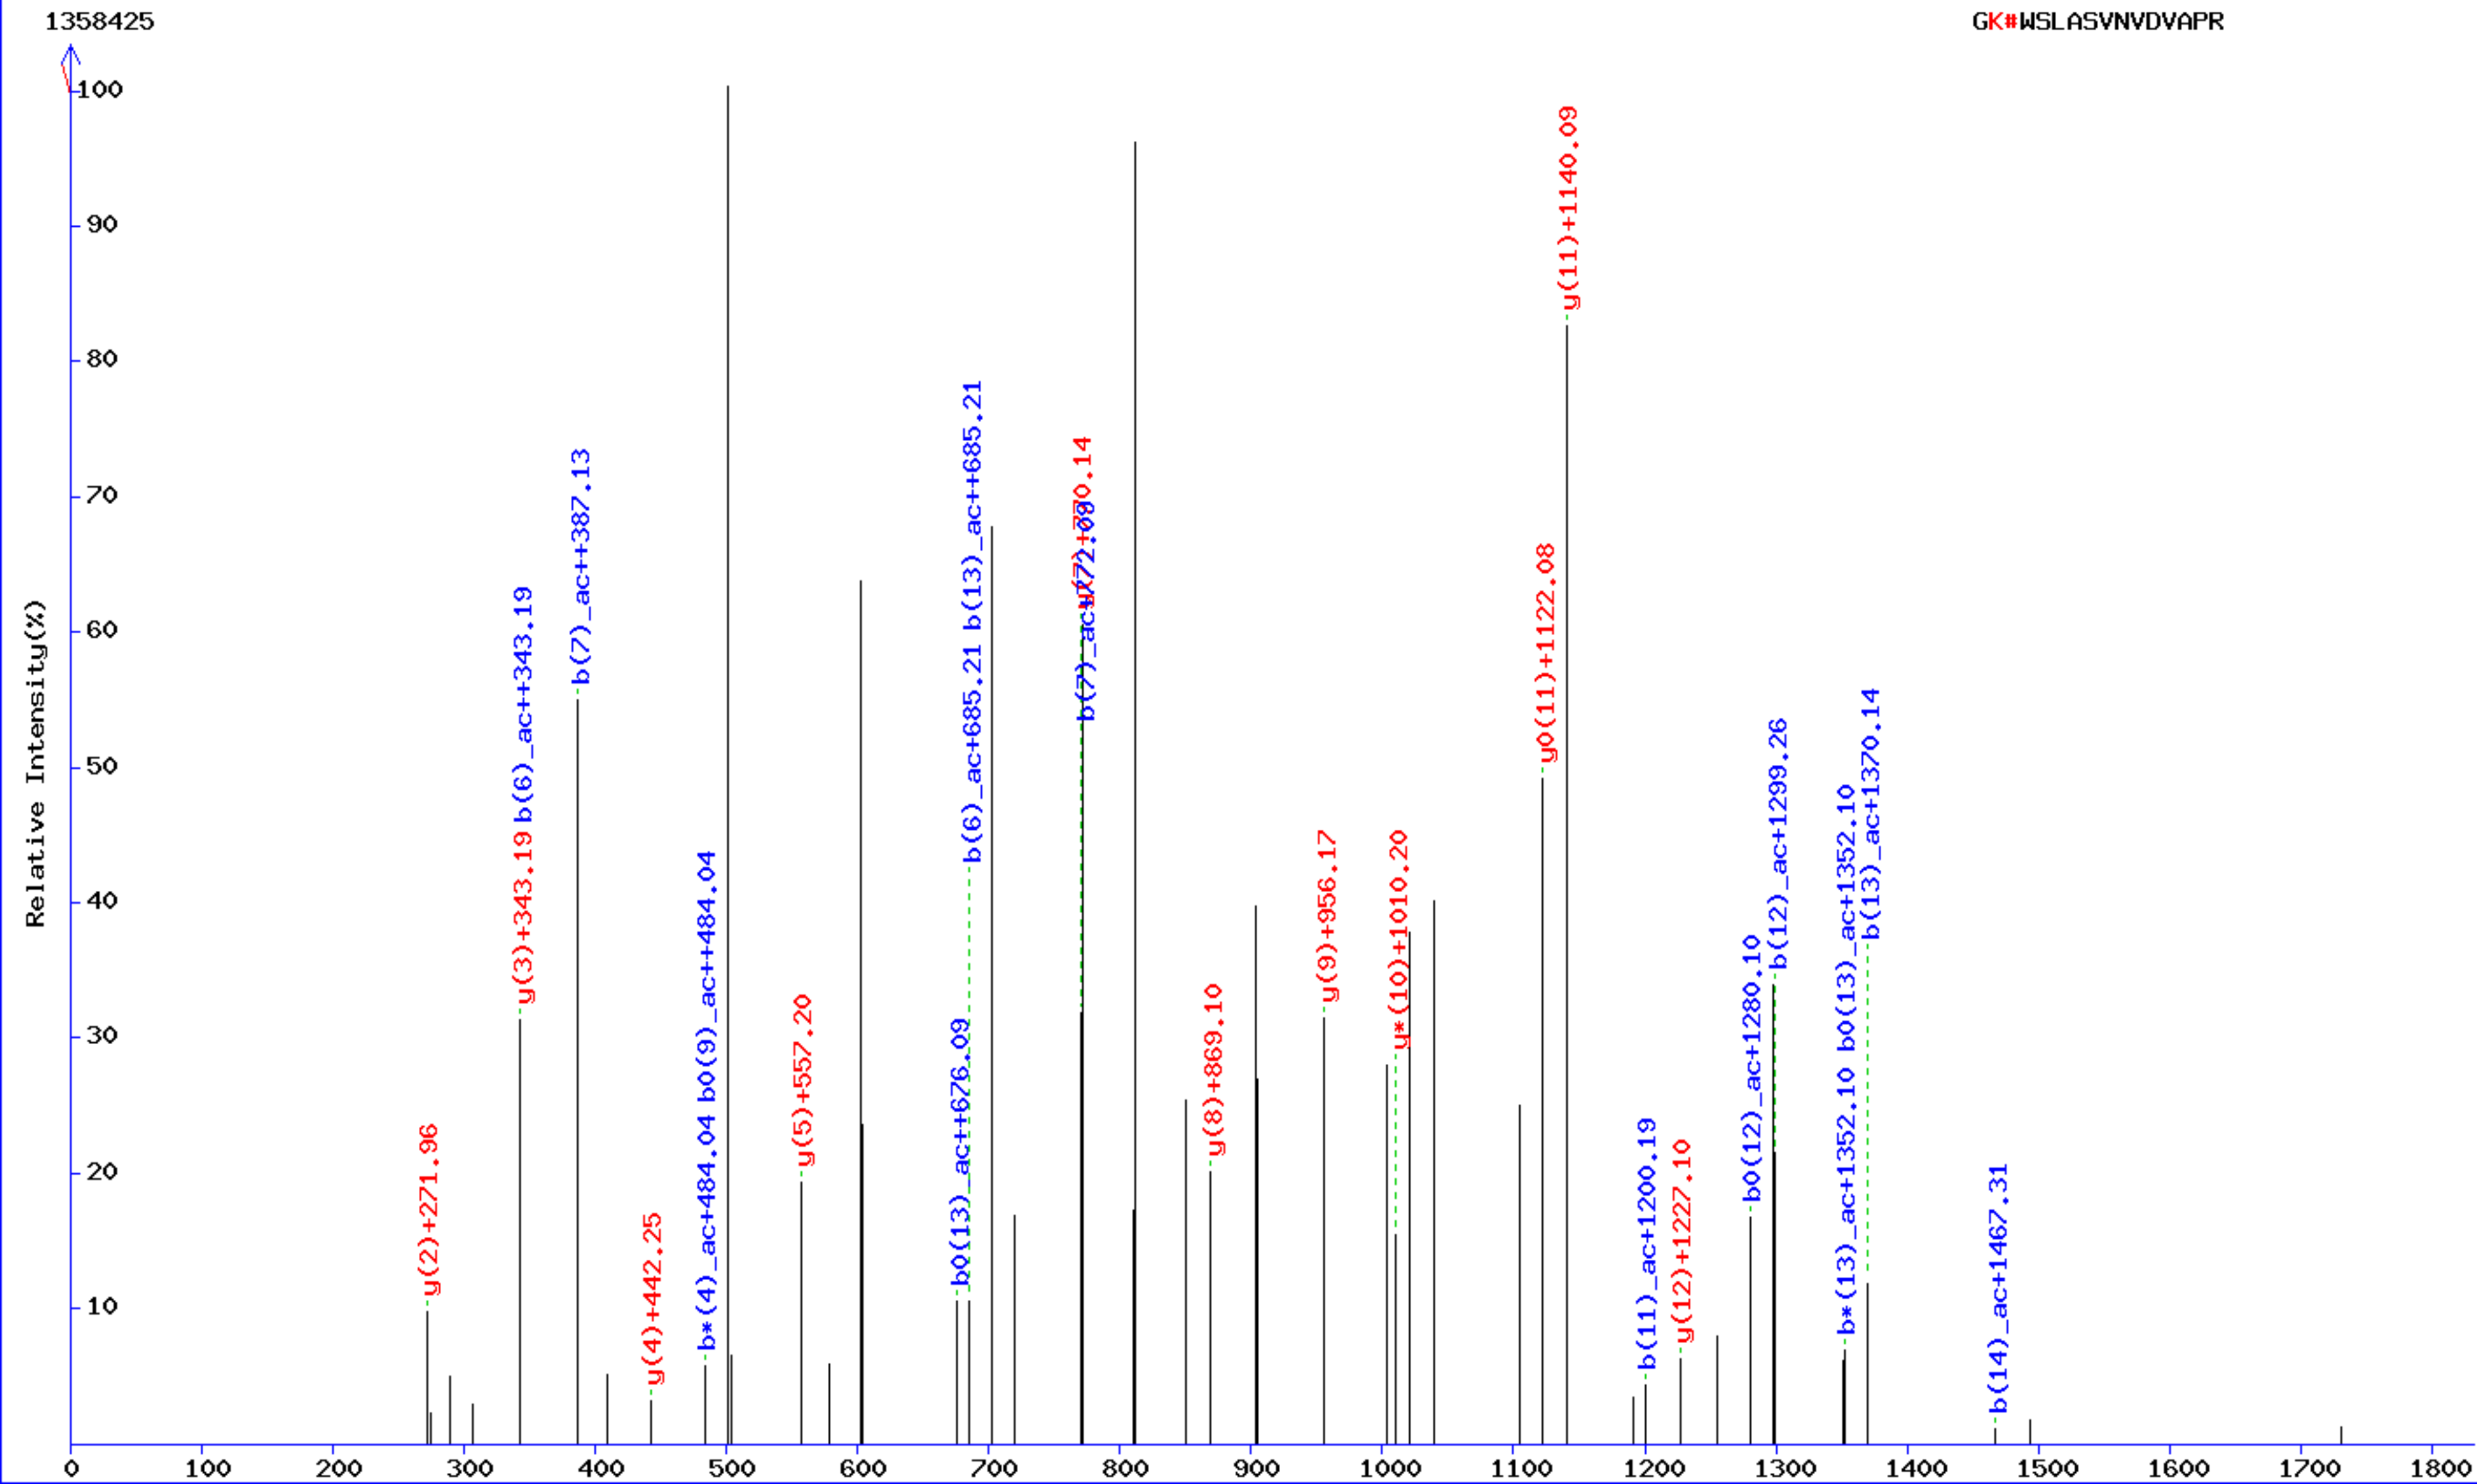

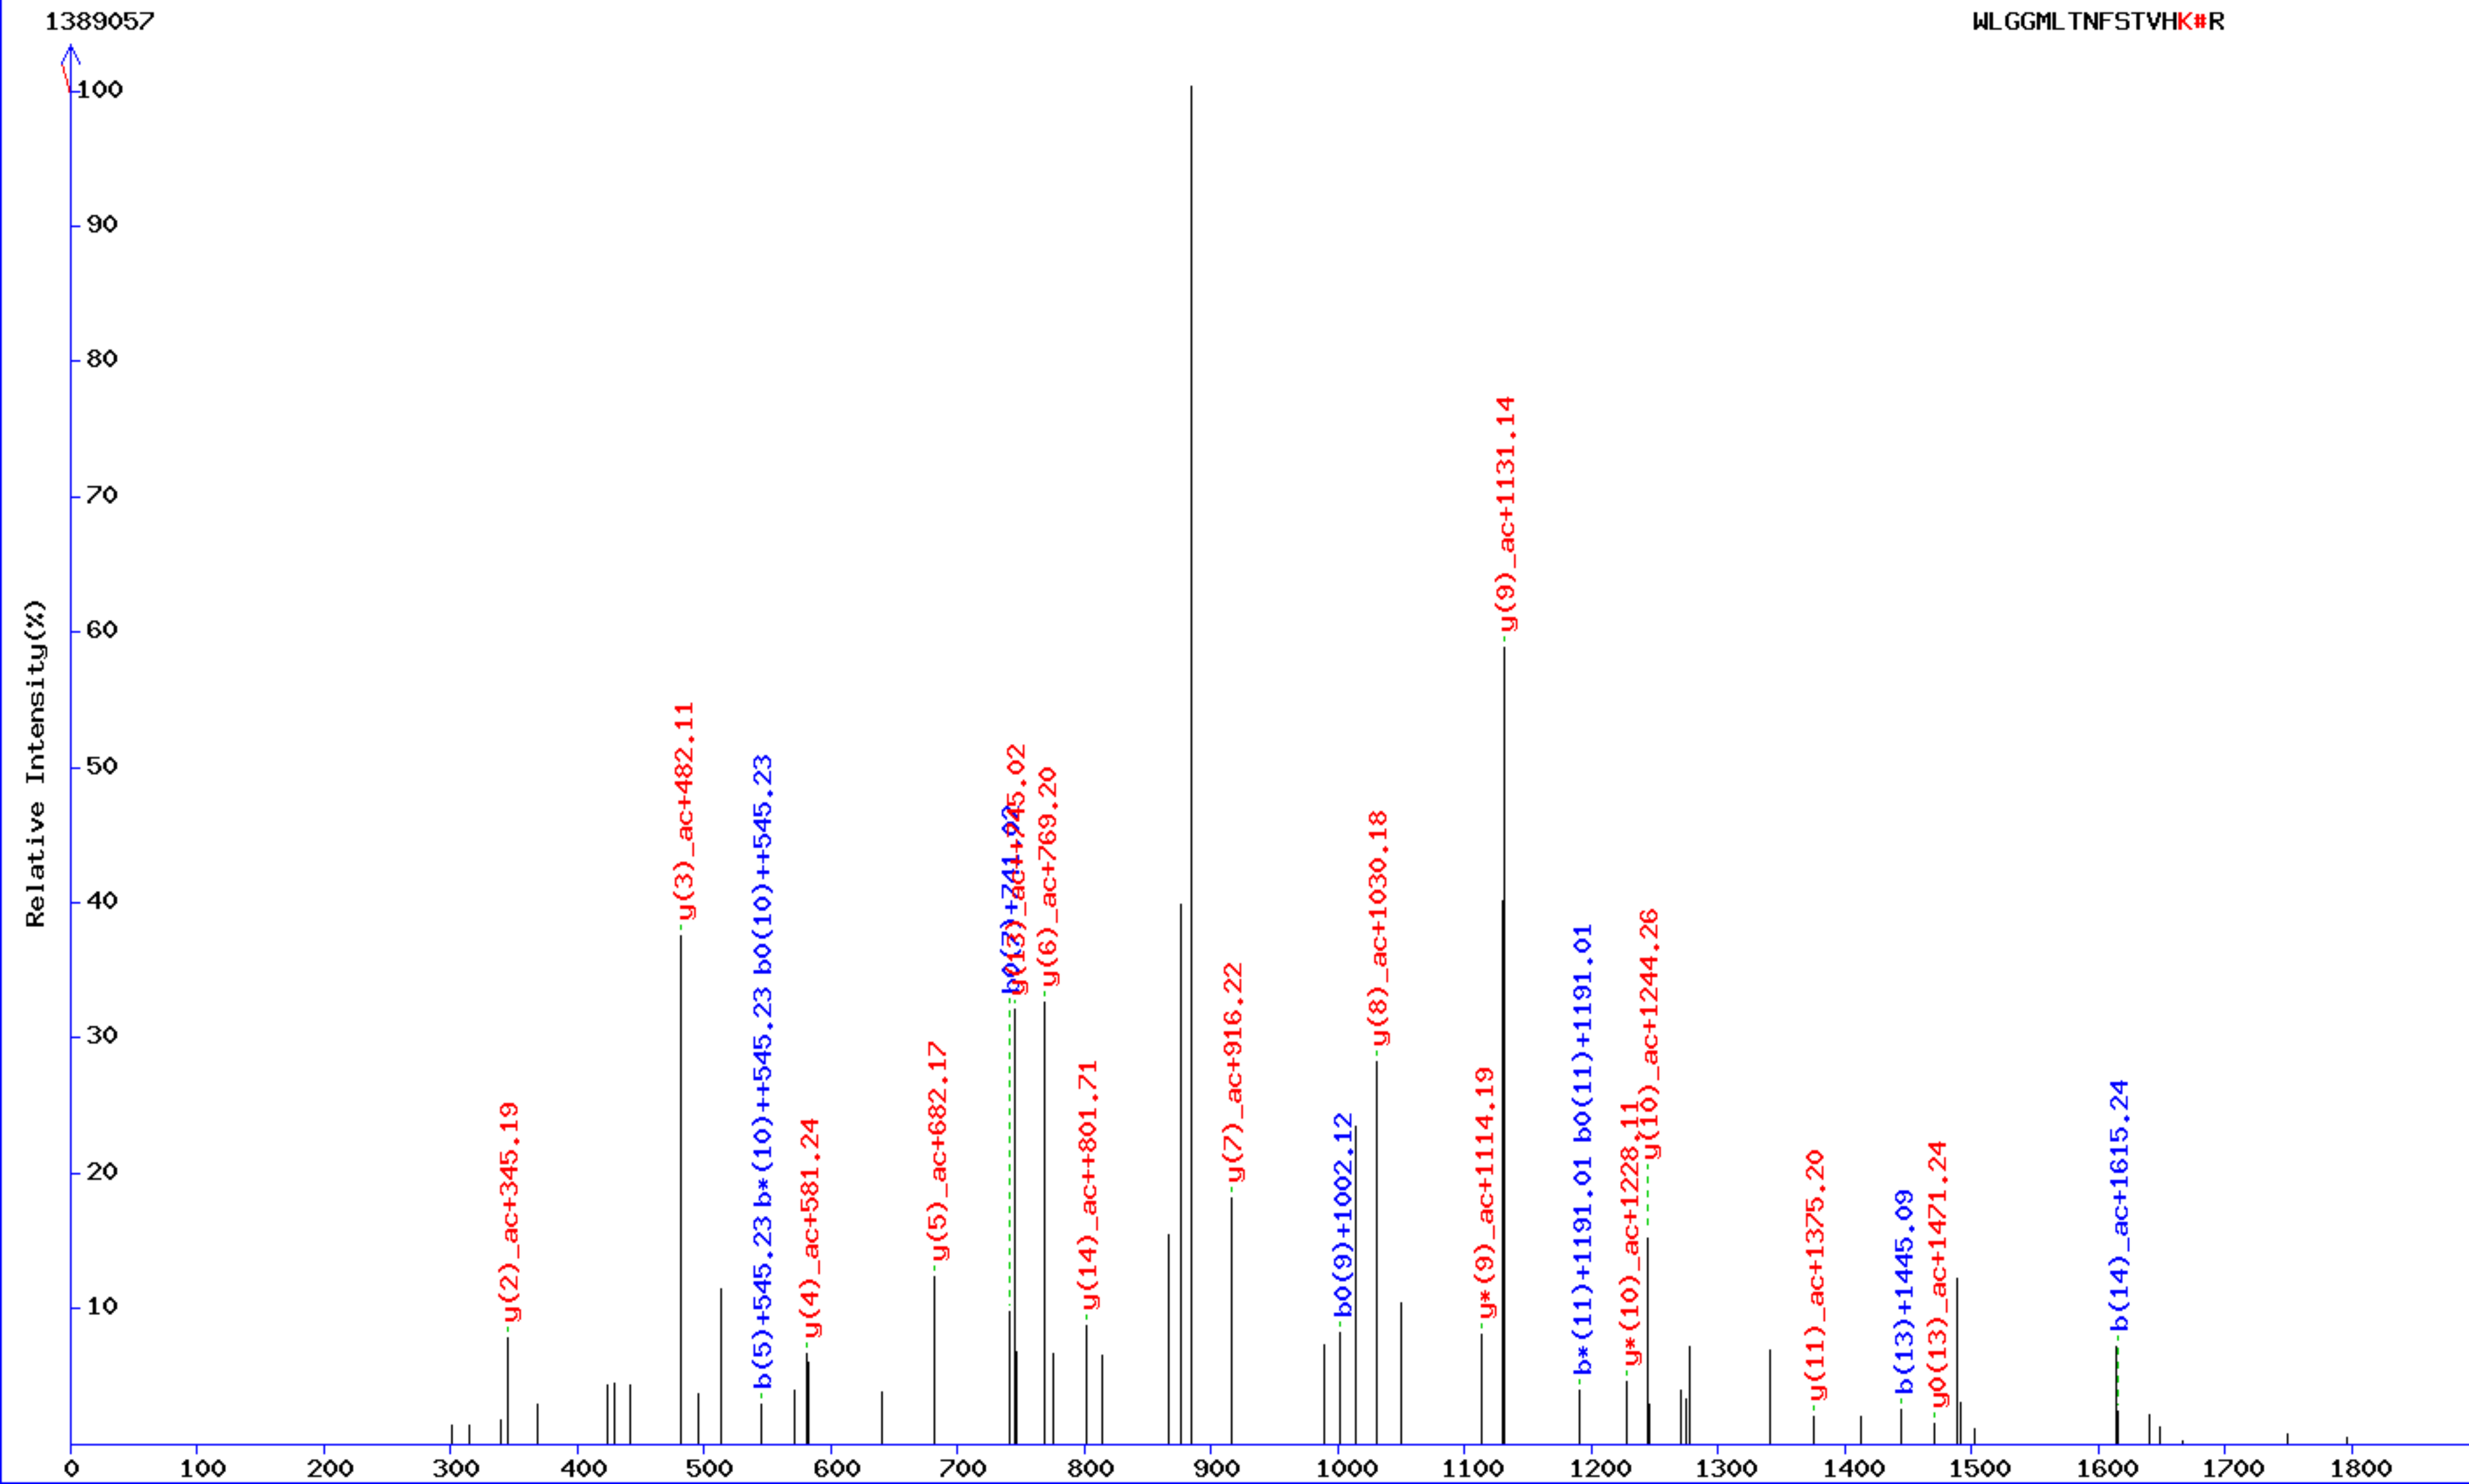



# gi|148660608 MRA\_0840 hypothetical protein

ELK#HLLINDLPIER

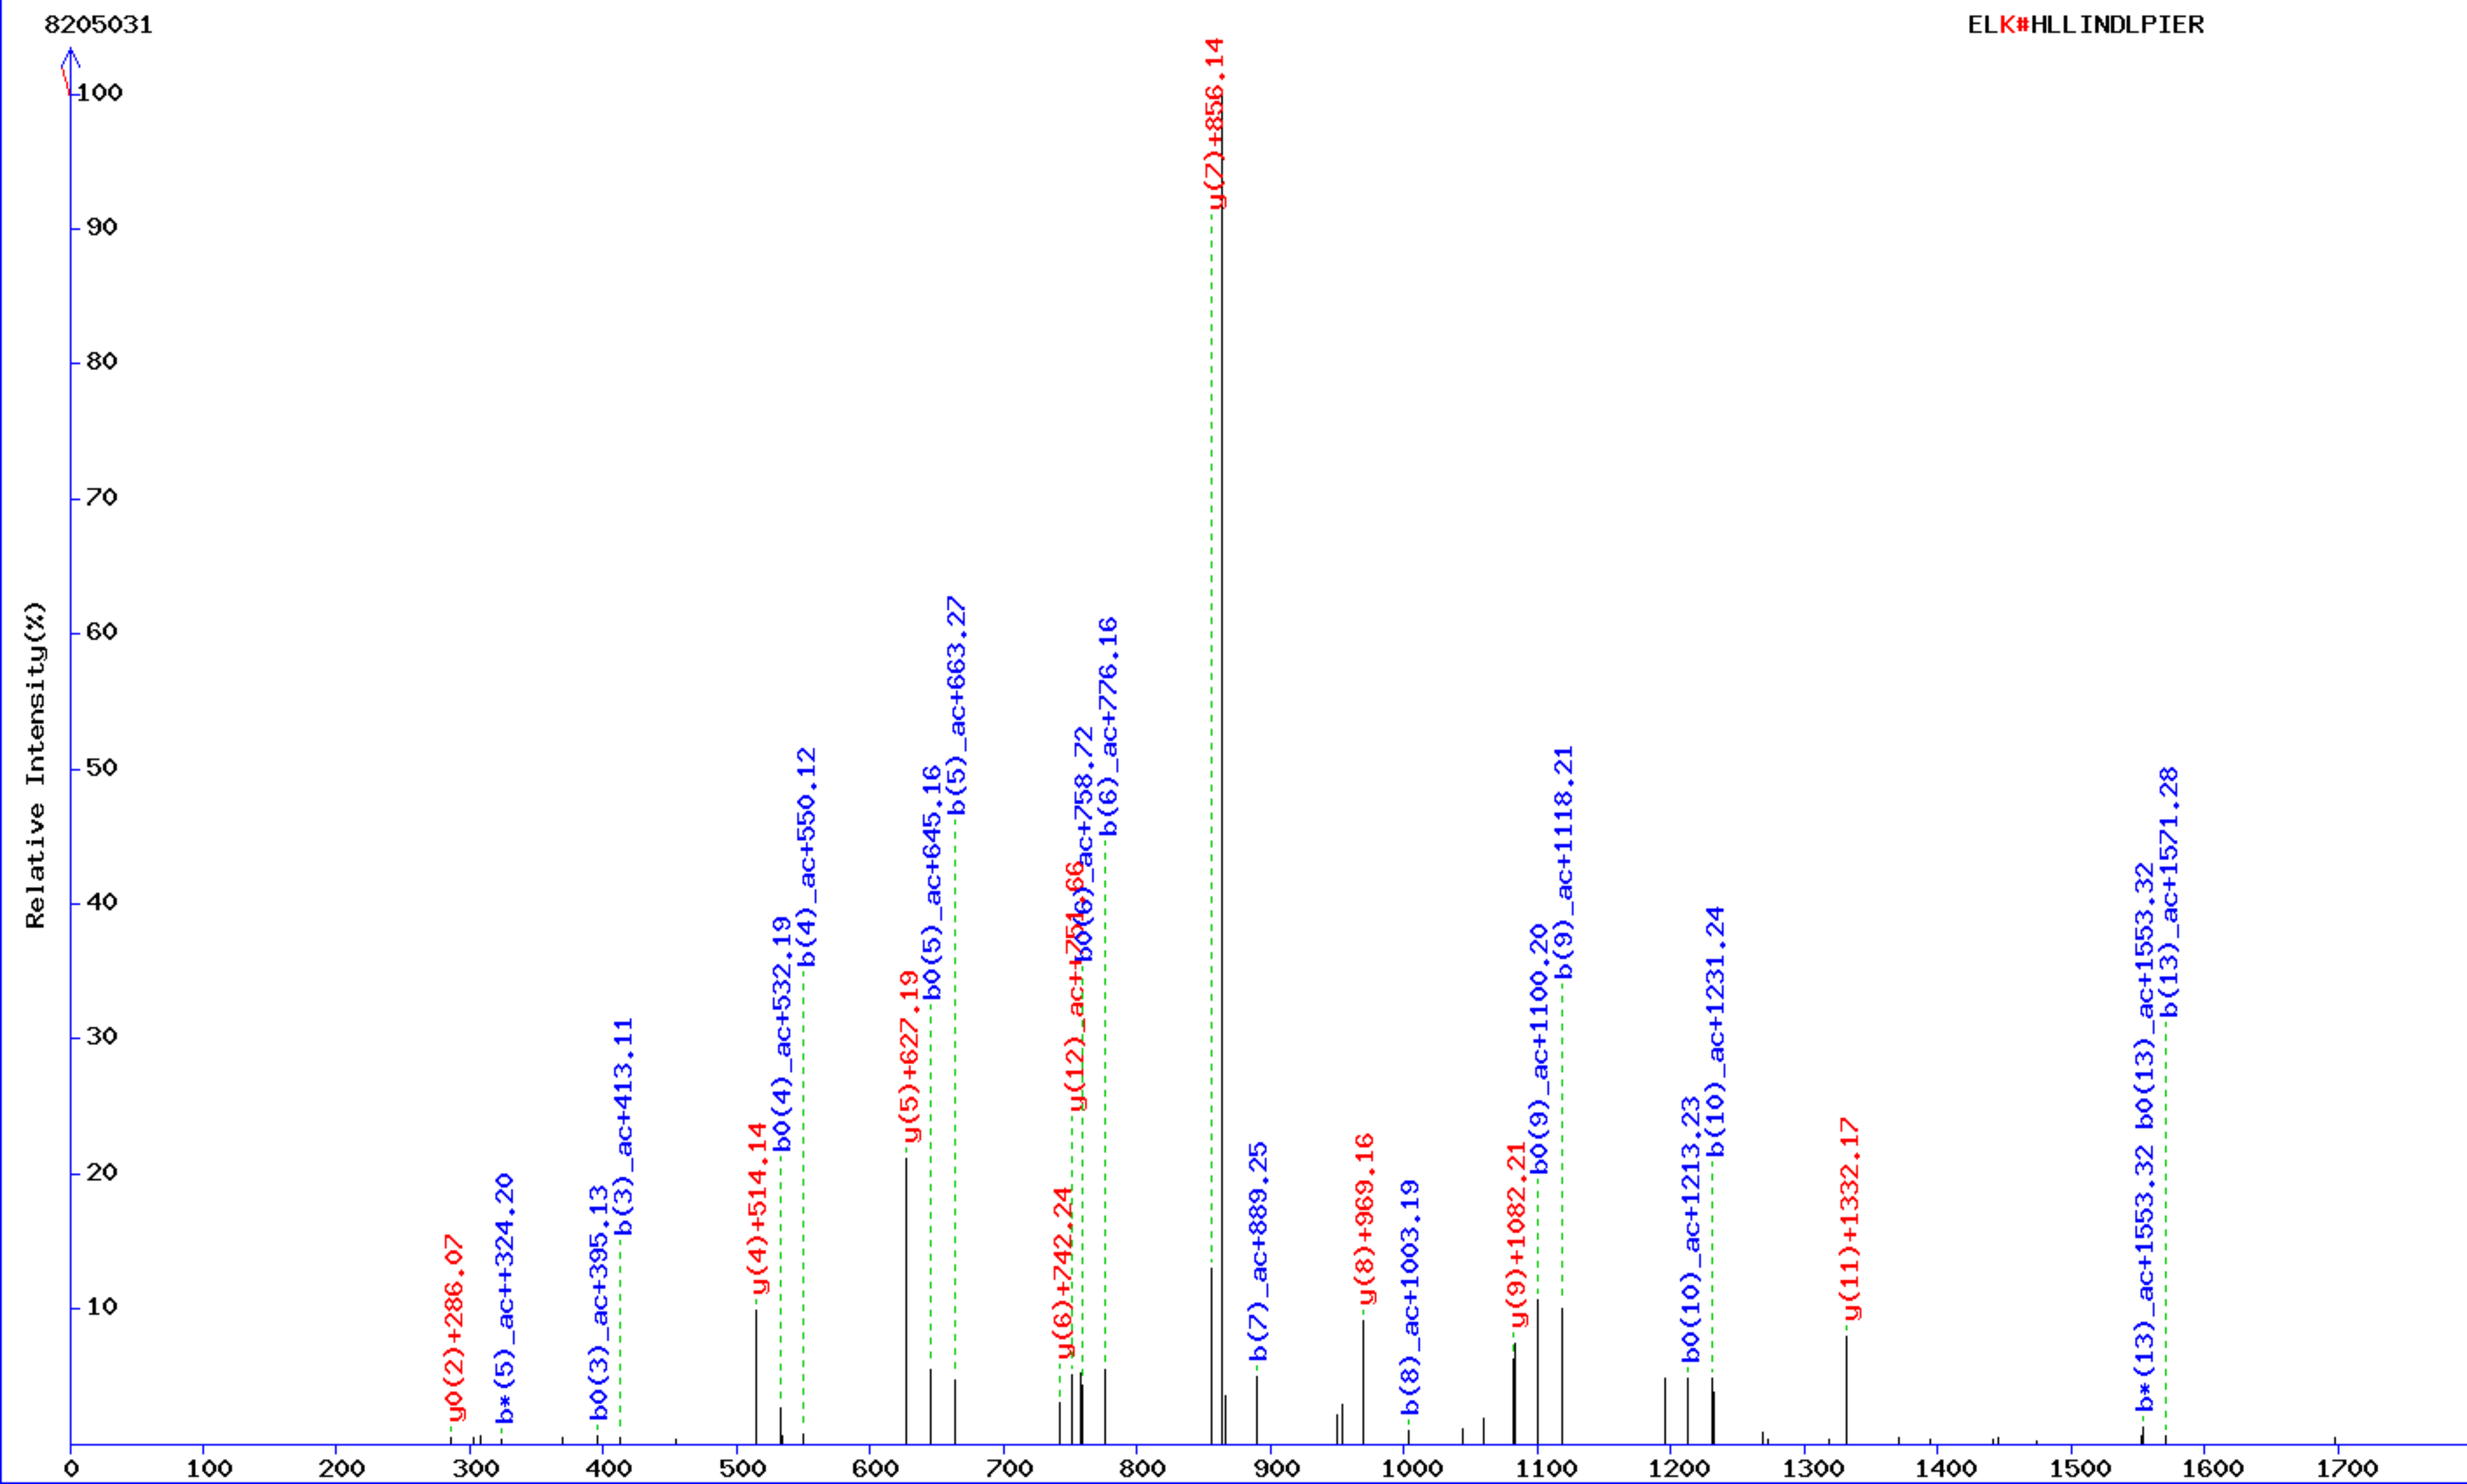

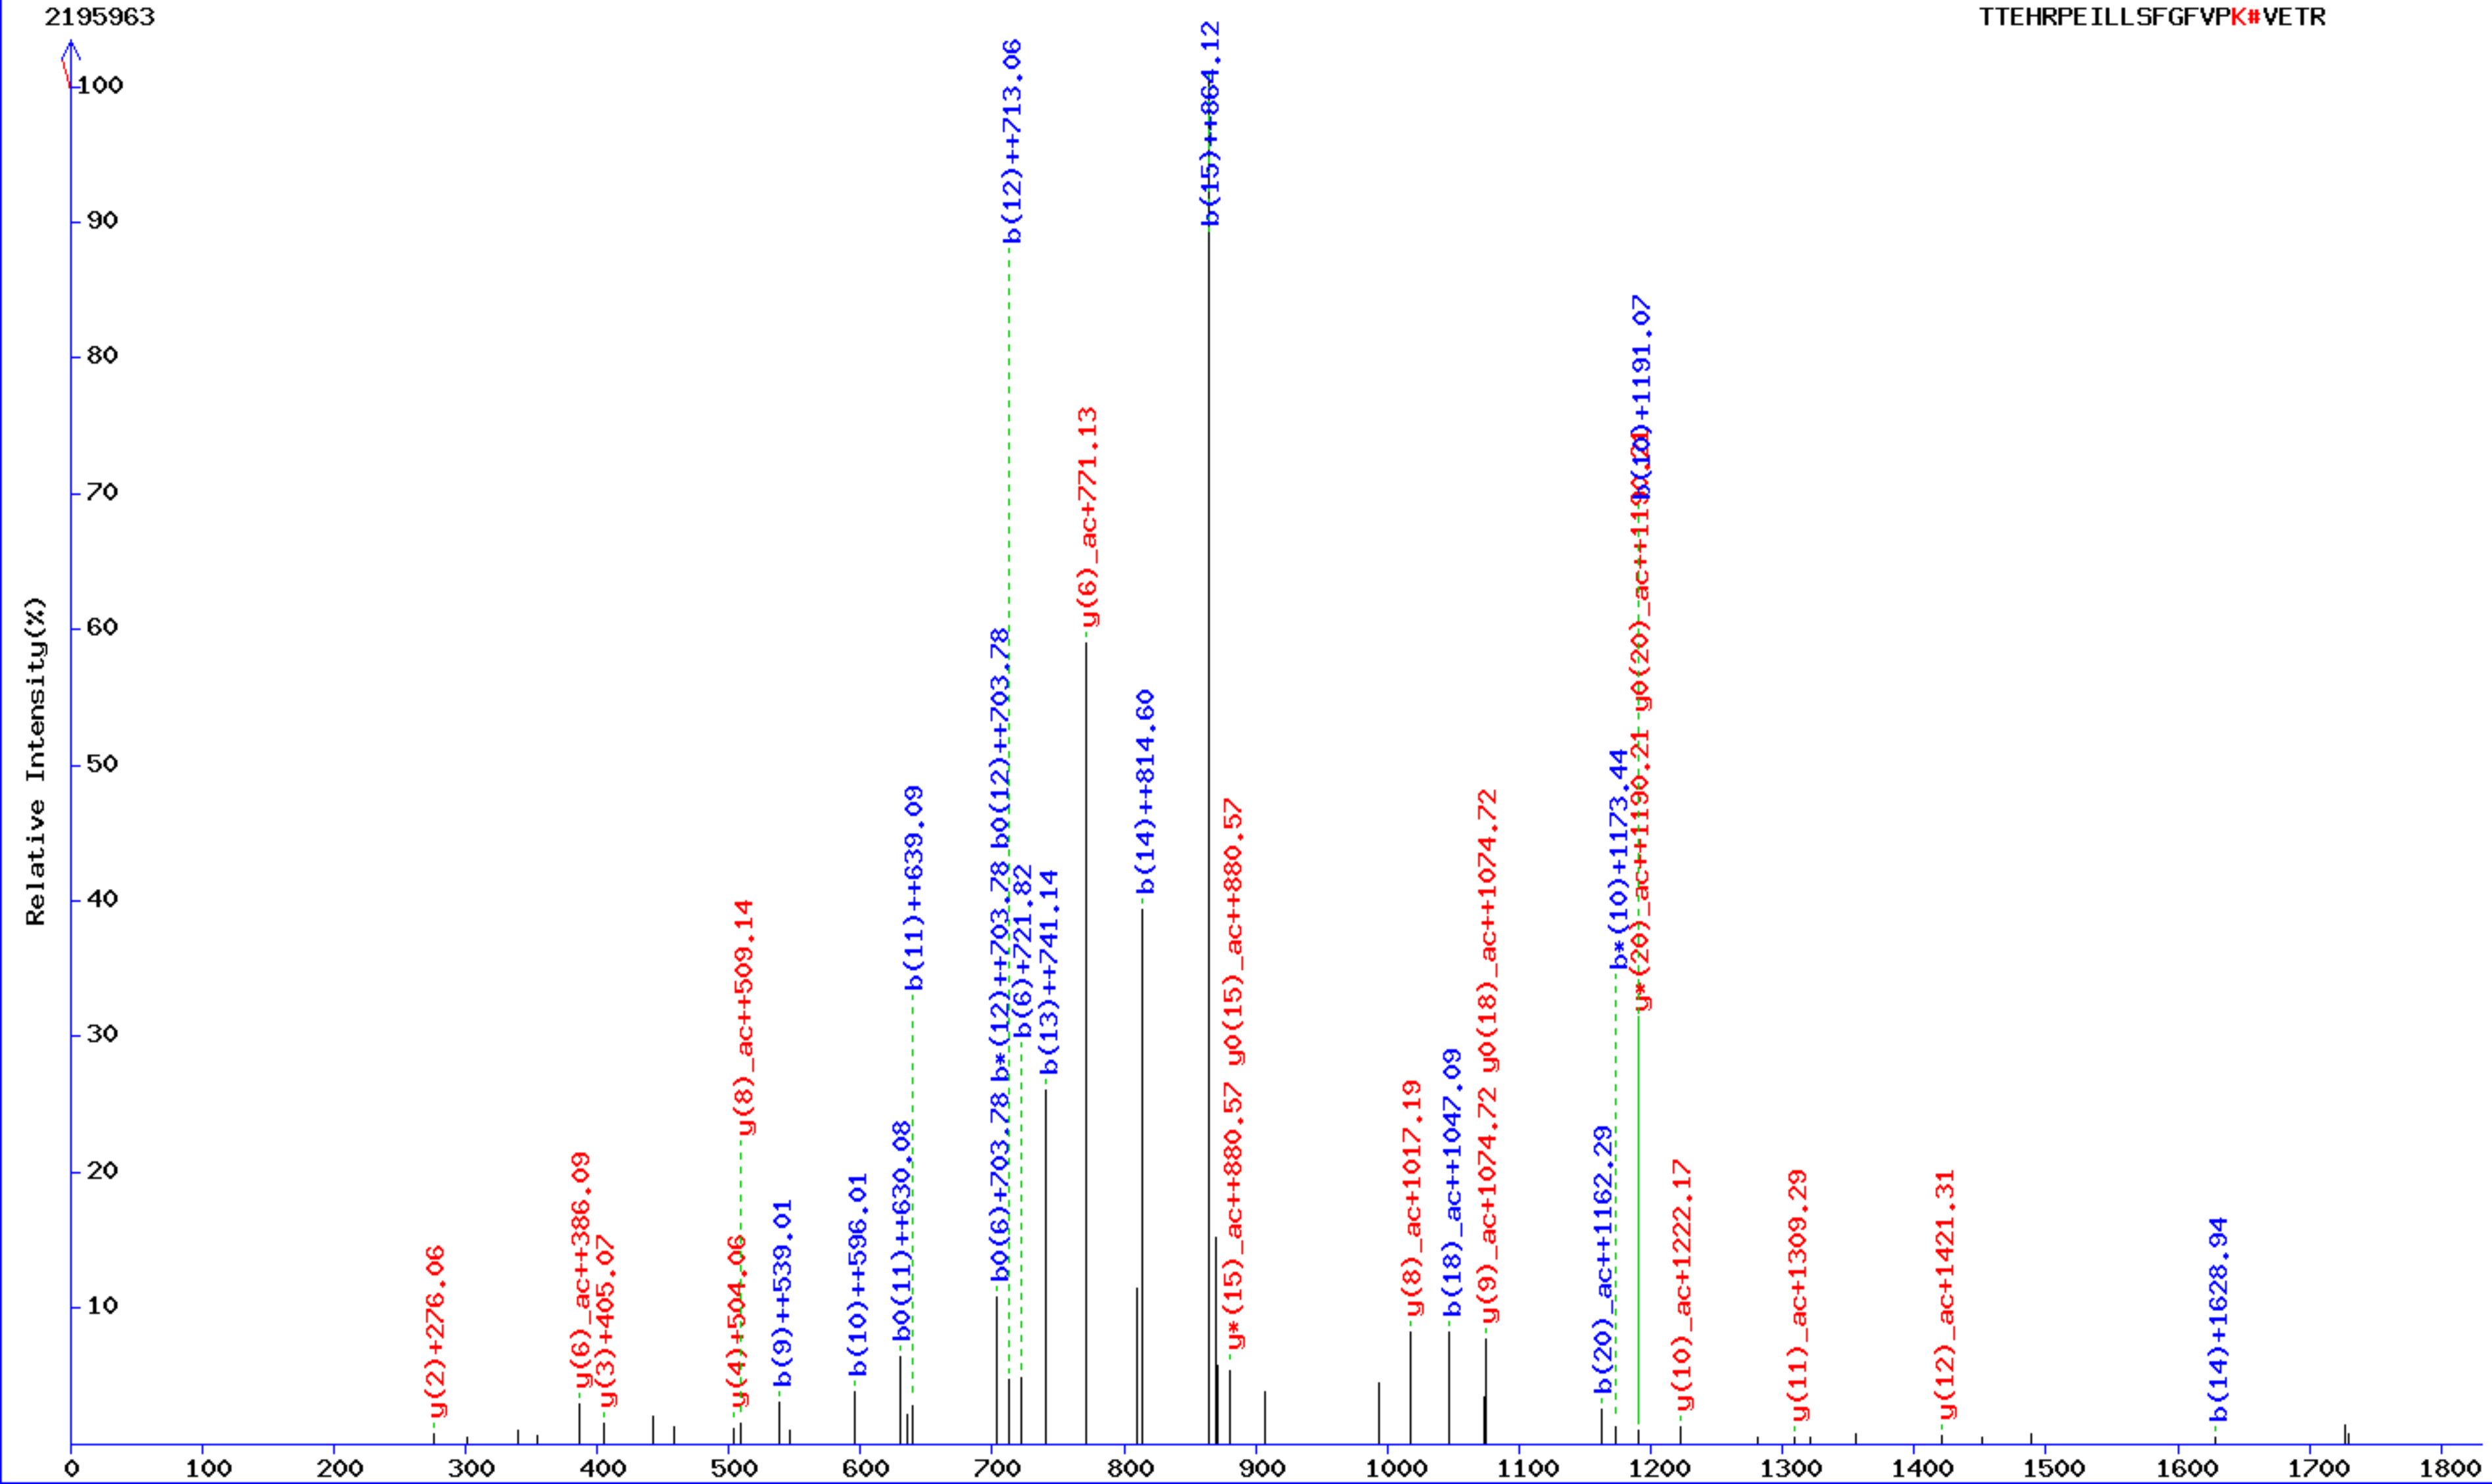

# gi|148660460 MRA\_0694 elongation factor Tu

TTLTAAITK#VLHDK

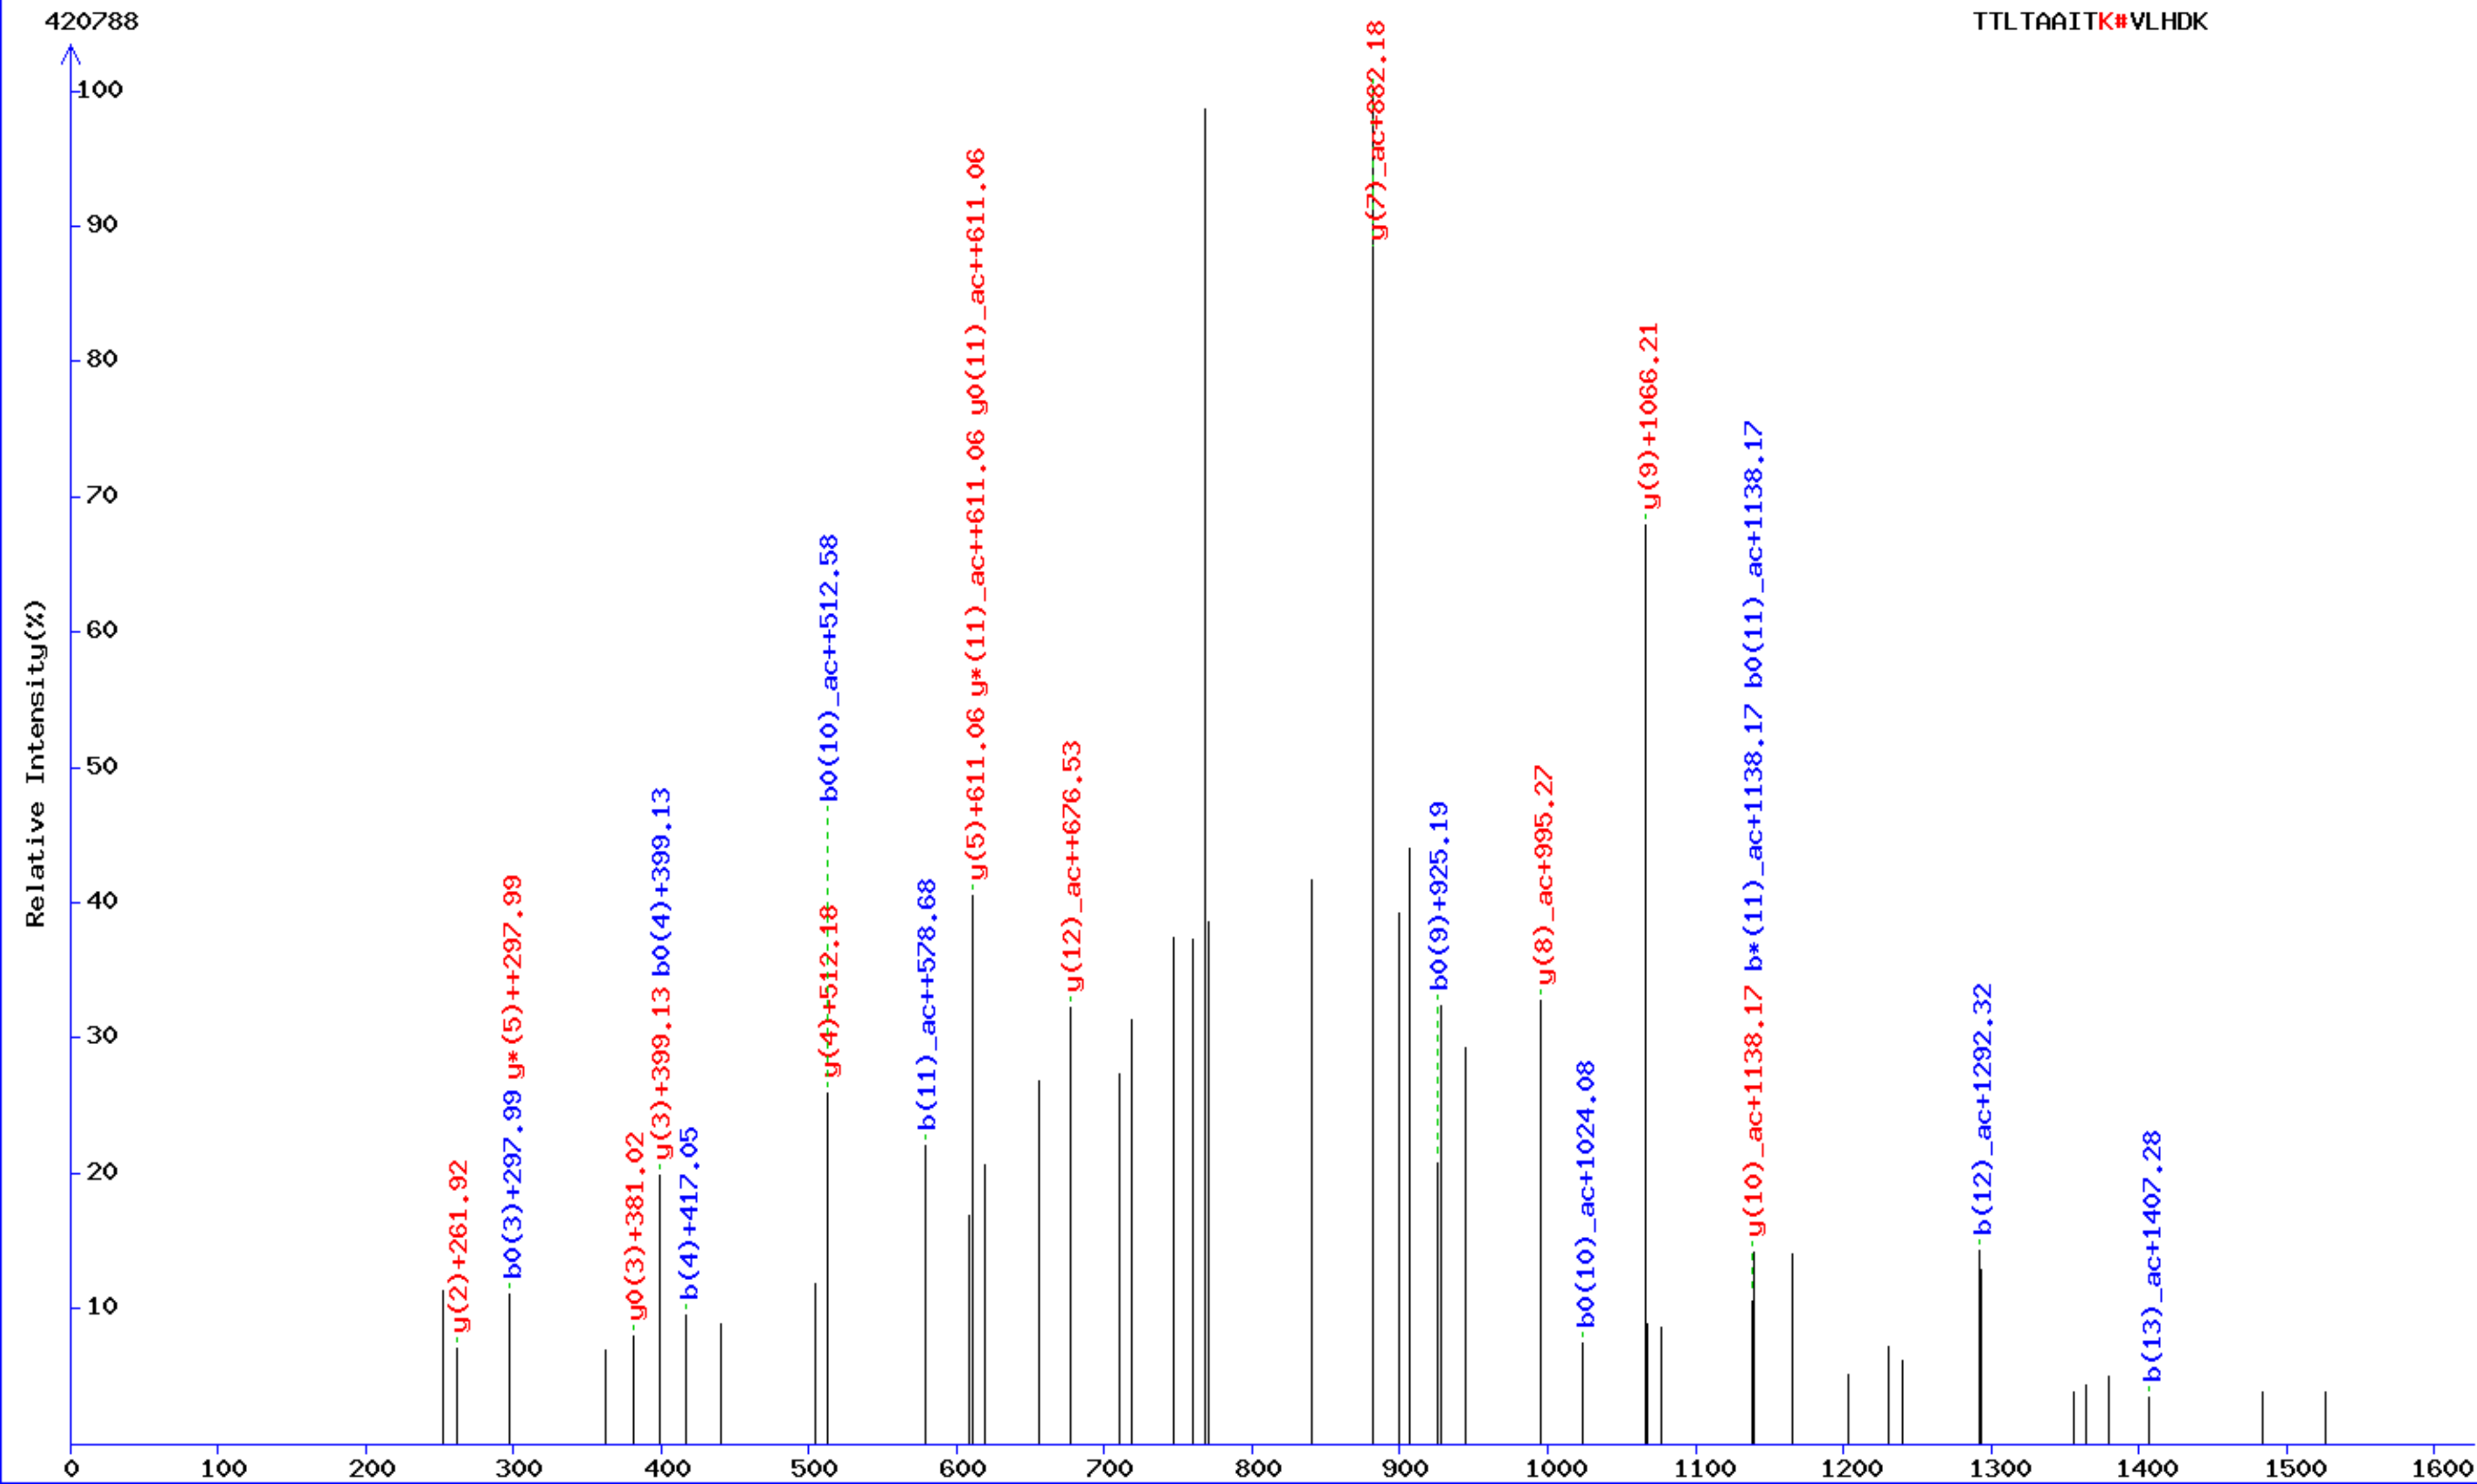

# gi|148661974 MRA\_2173 UDP-N-acetylmuramoylalanyl-D-glutamate--2,6-diaminopimelate ligase

GQGFLALVDYAHK#PEALR

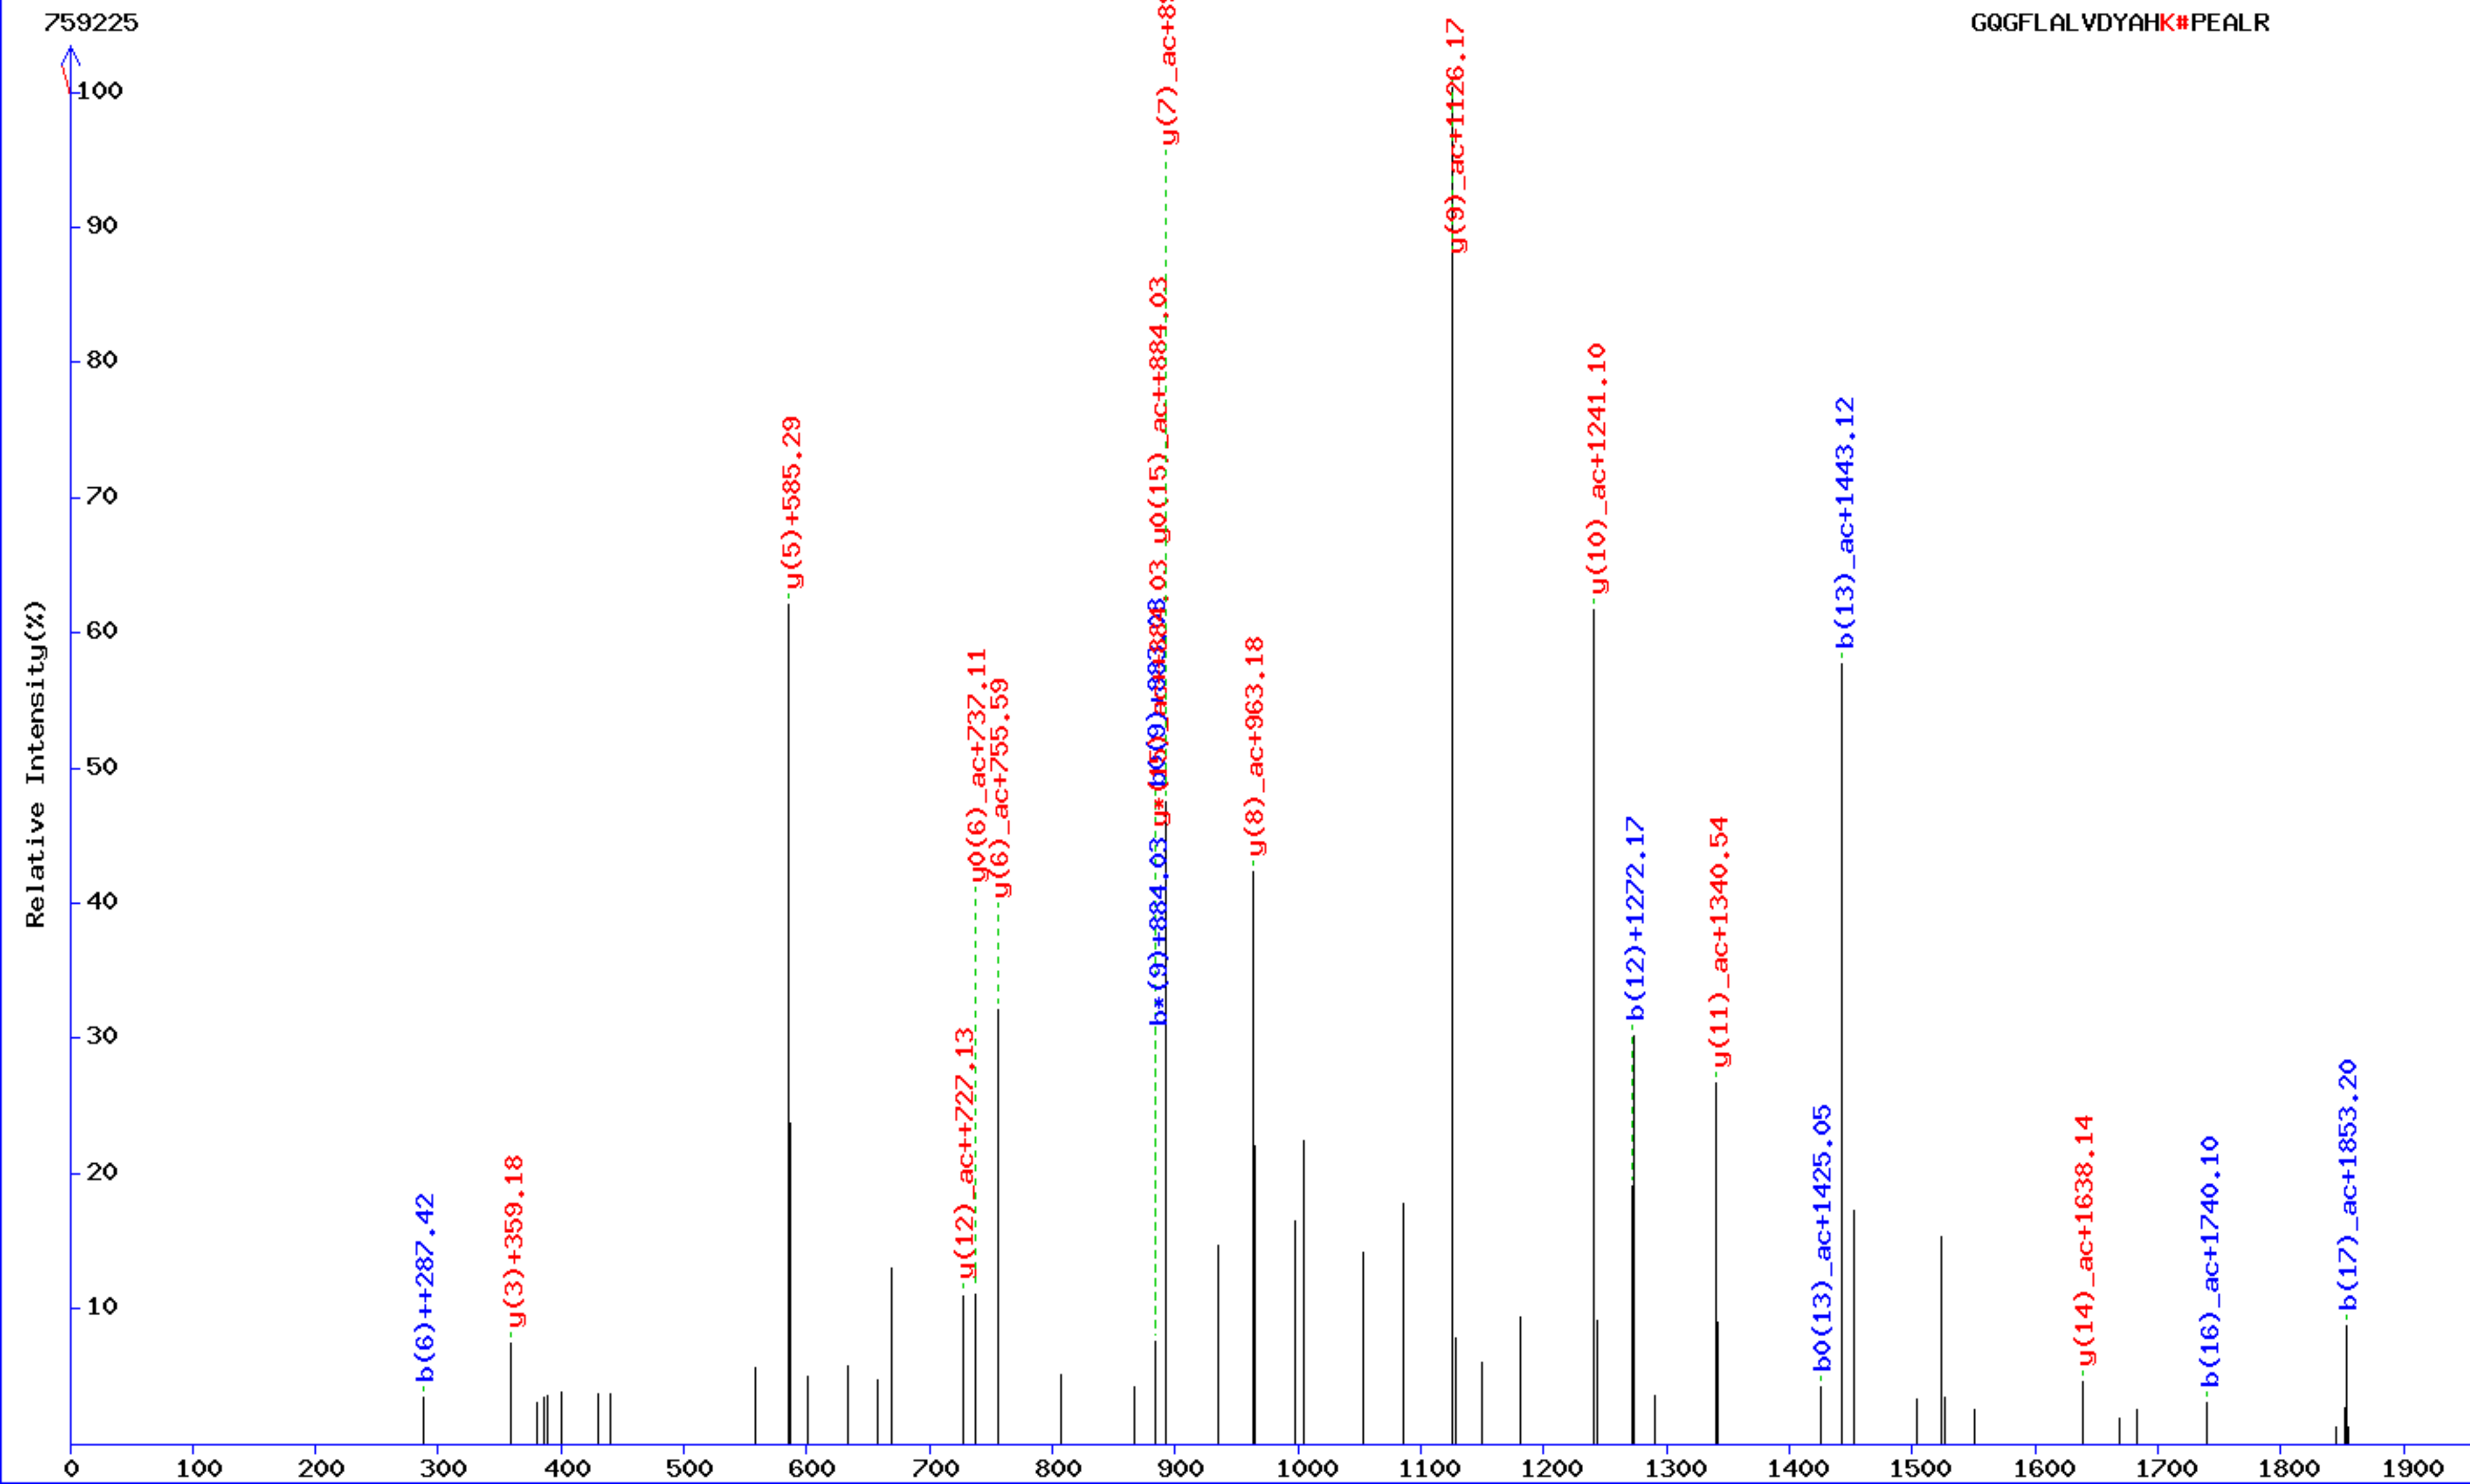

# gi|148662446 MRA\_2634 pyridoxal biosynthesis lyase PdxS

ATTFDDPDVLA#VSR

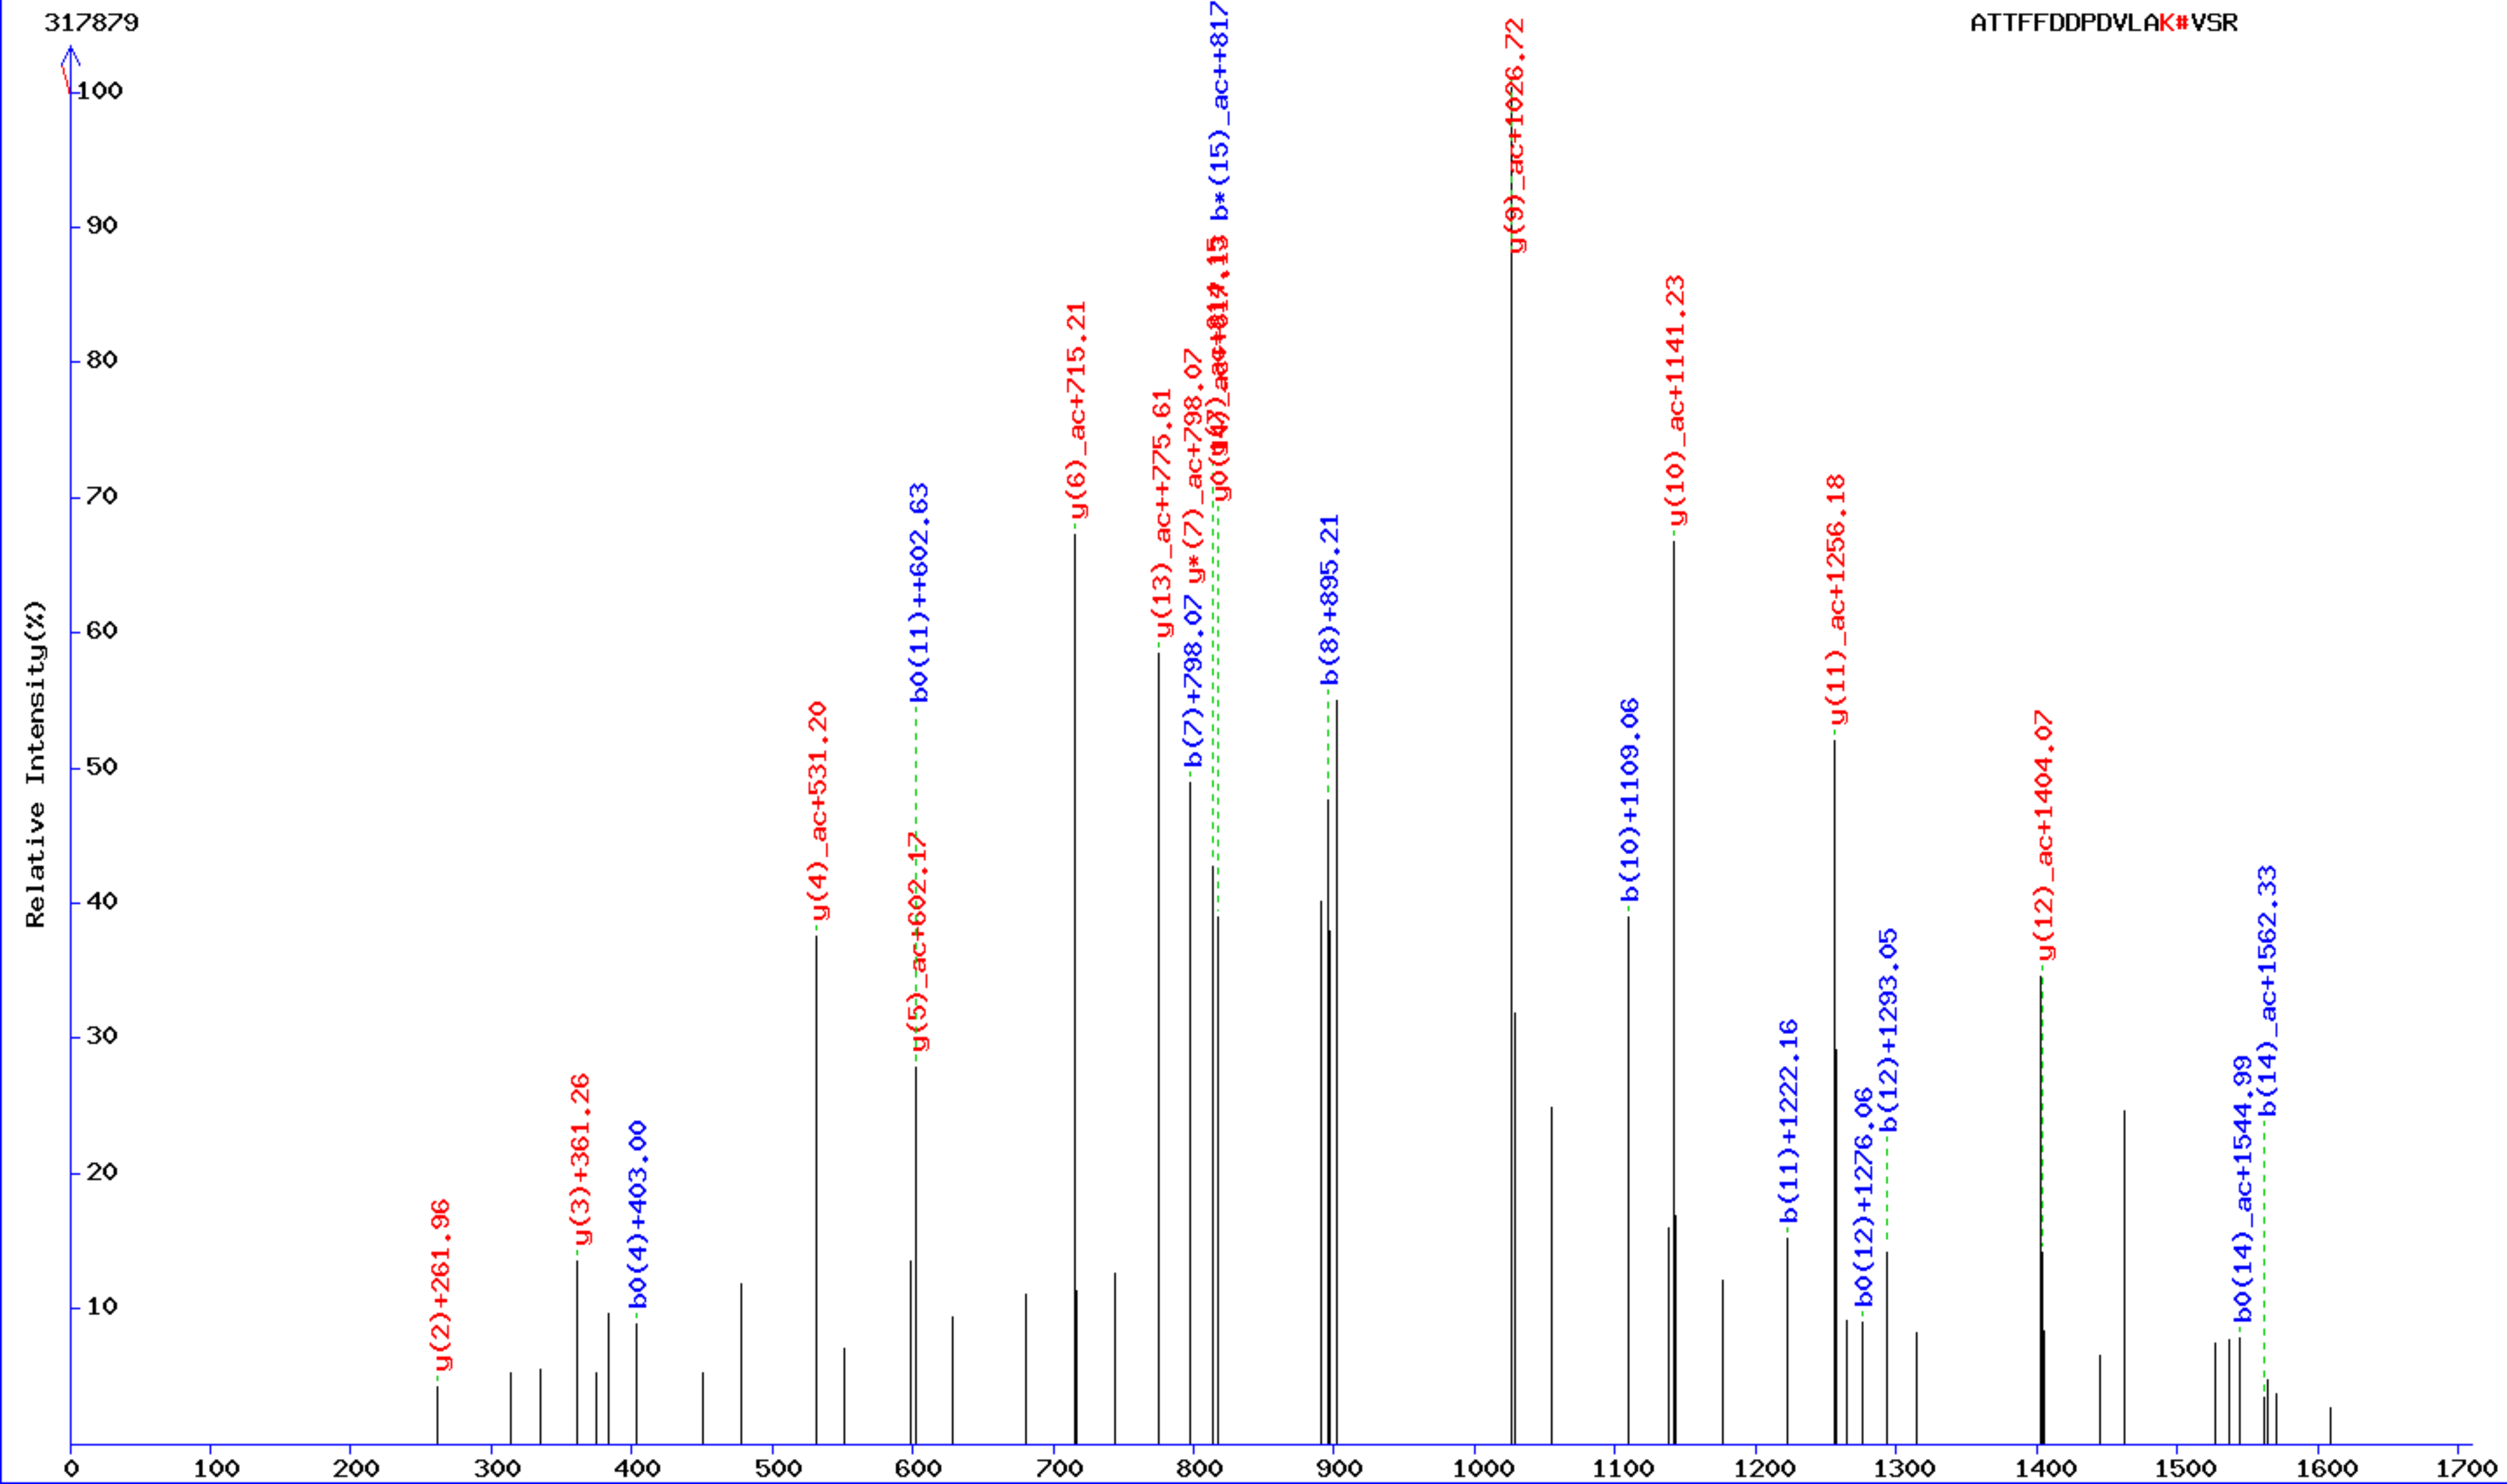

gi|148661183 MRA\_1401 S-adenosylmethionine synthetase

VLVNPTGK#FVLGGPMGDAGLTGR

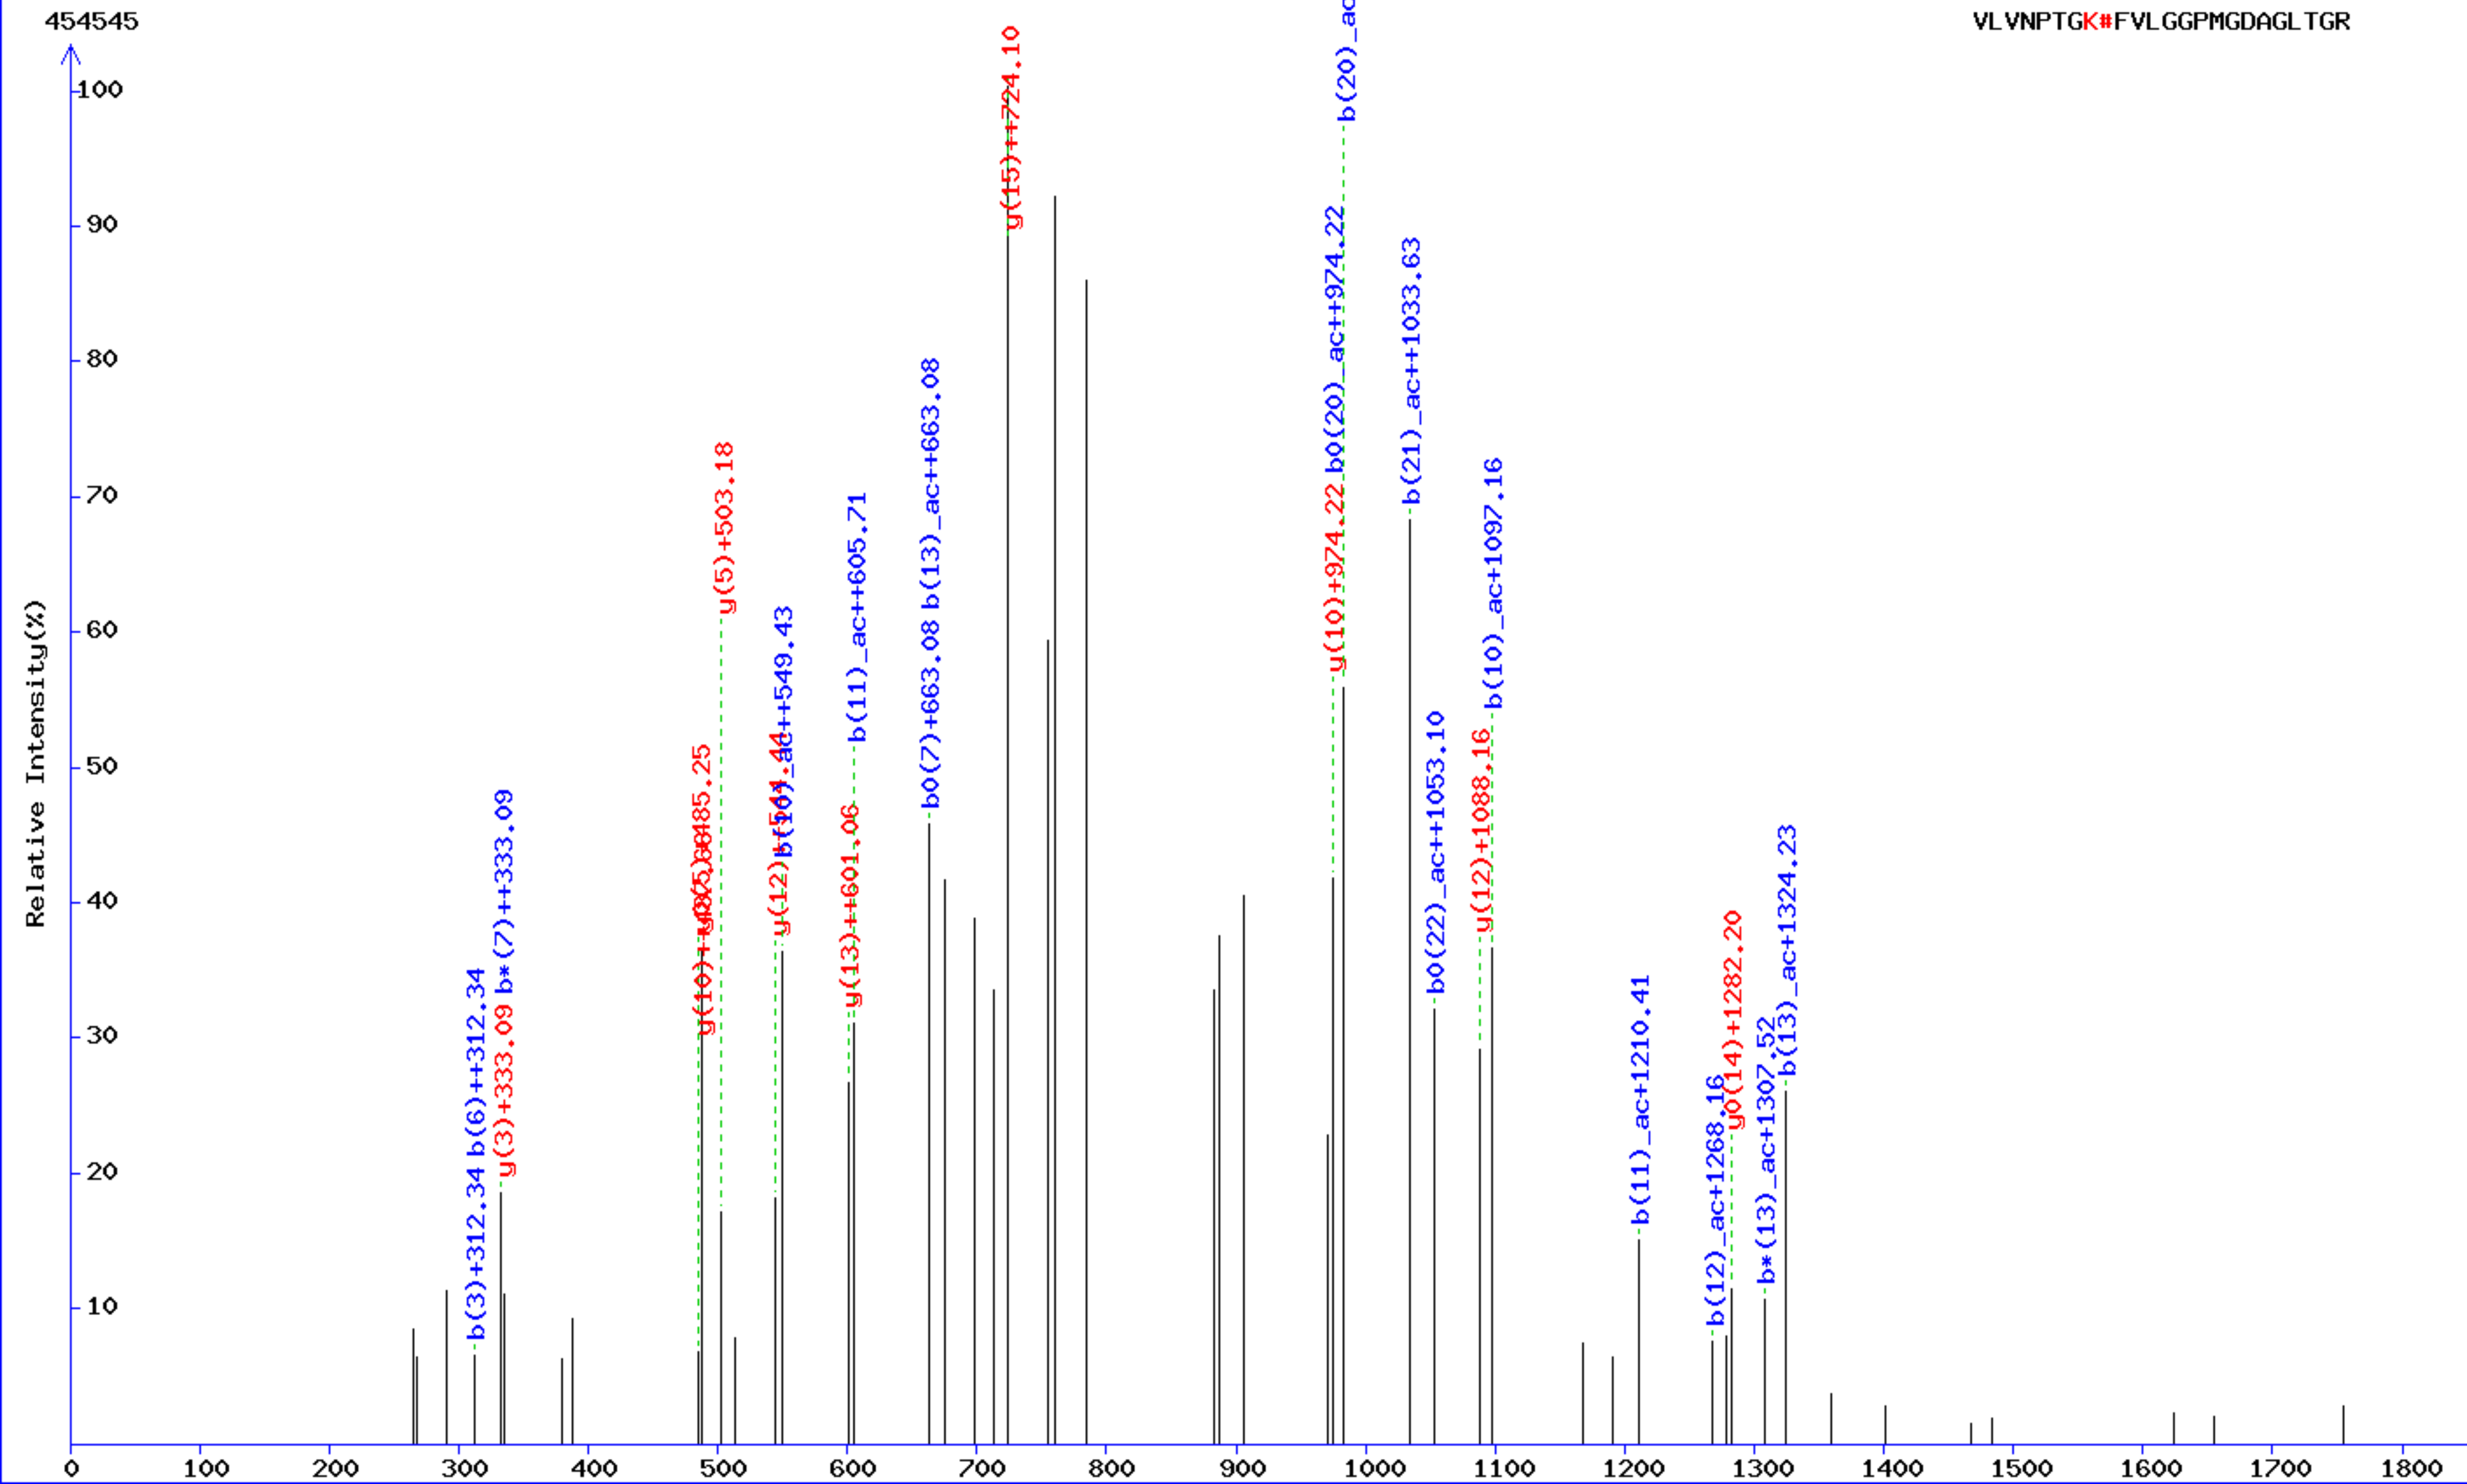

## gi|148660129 MRA\_0372 fructose-bisphosphate aldolase

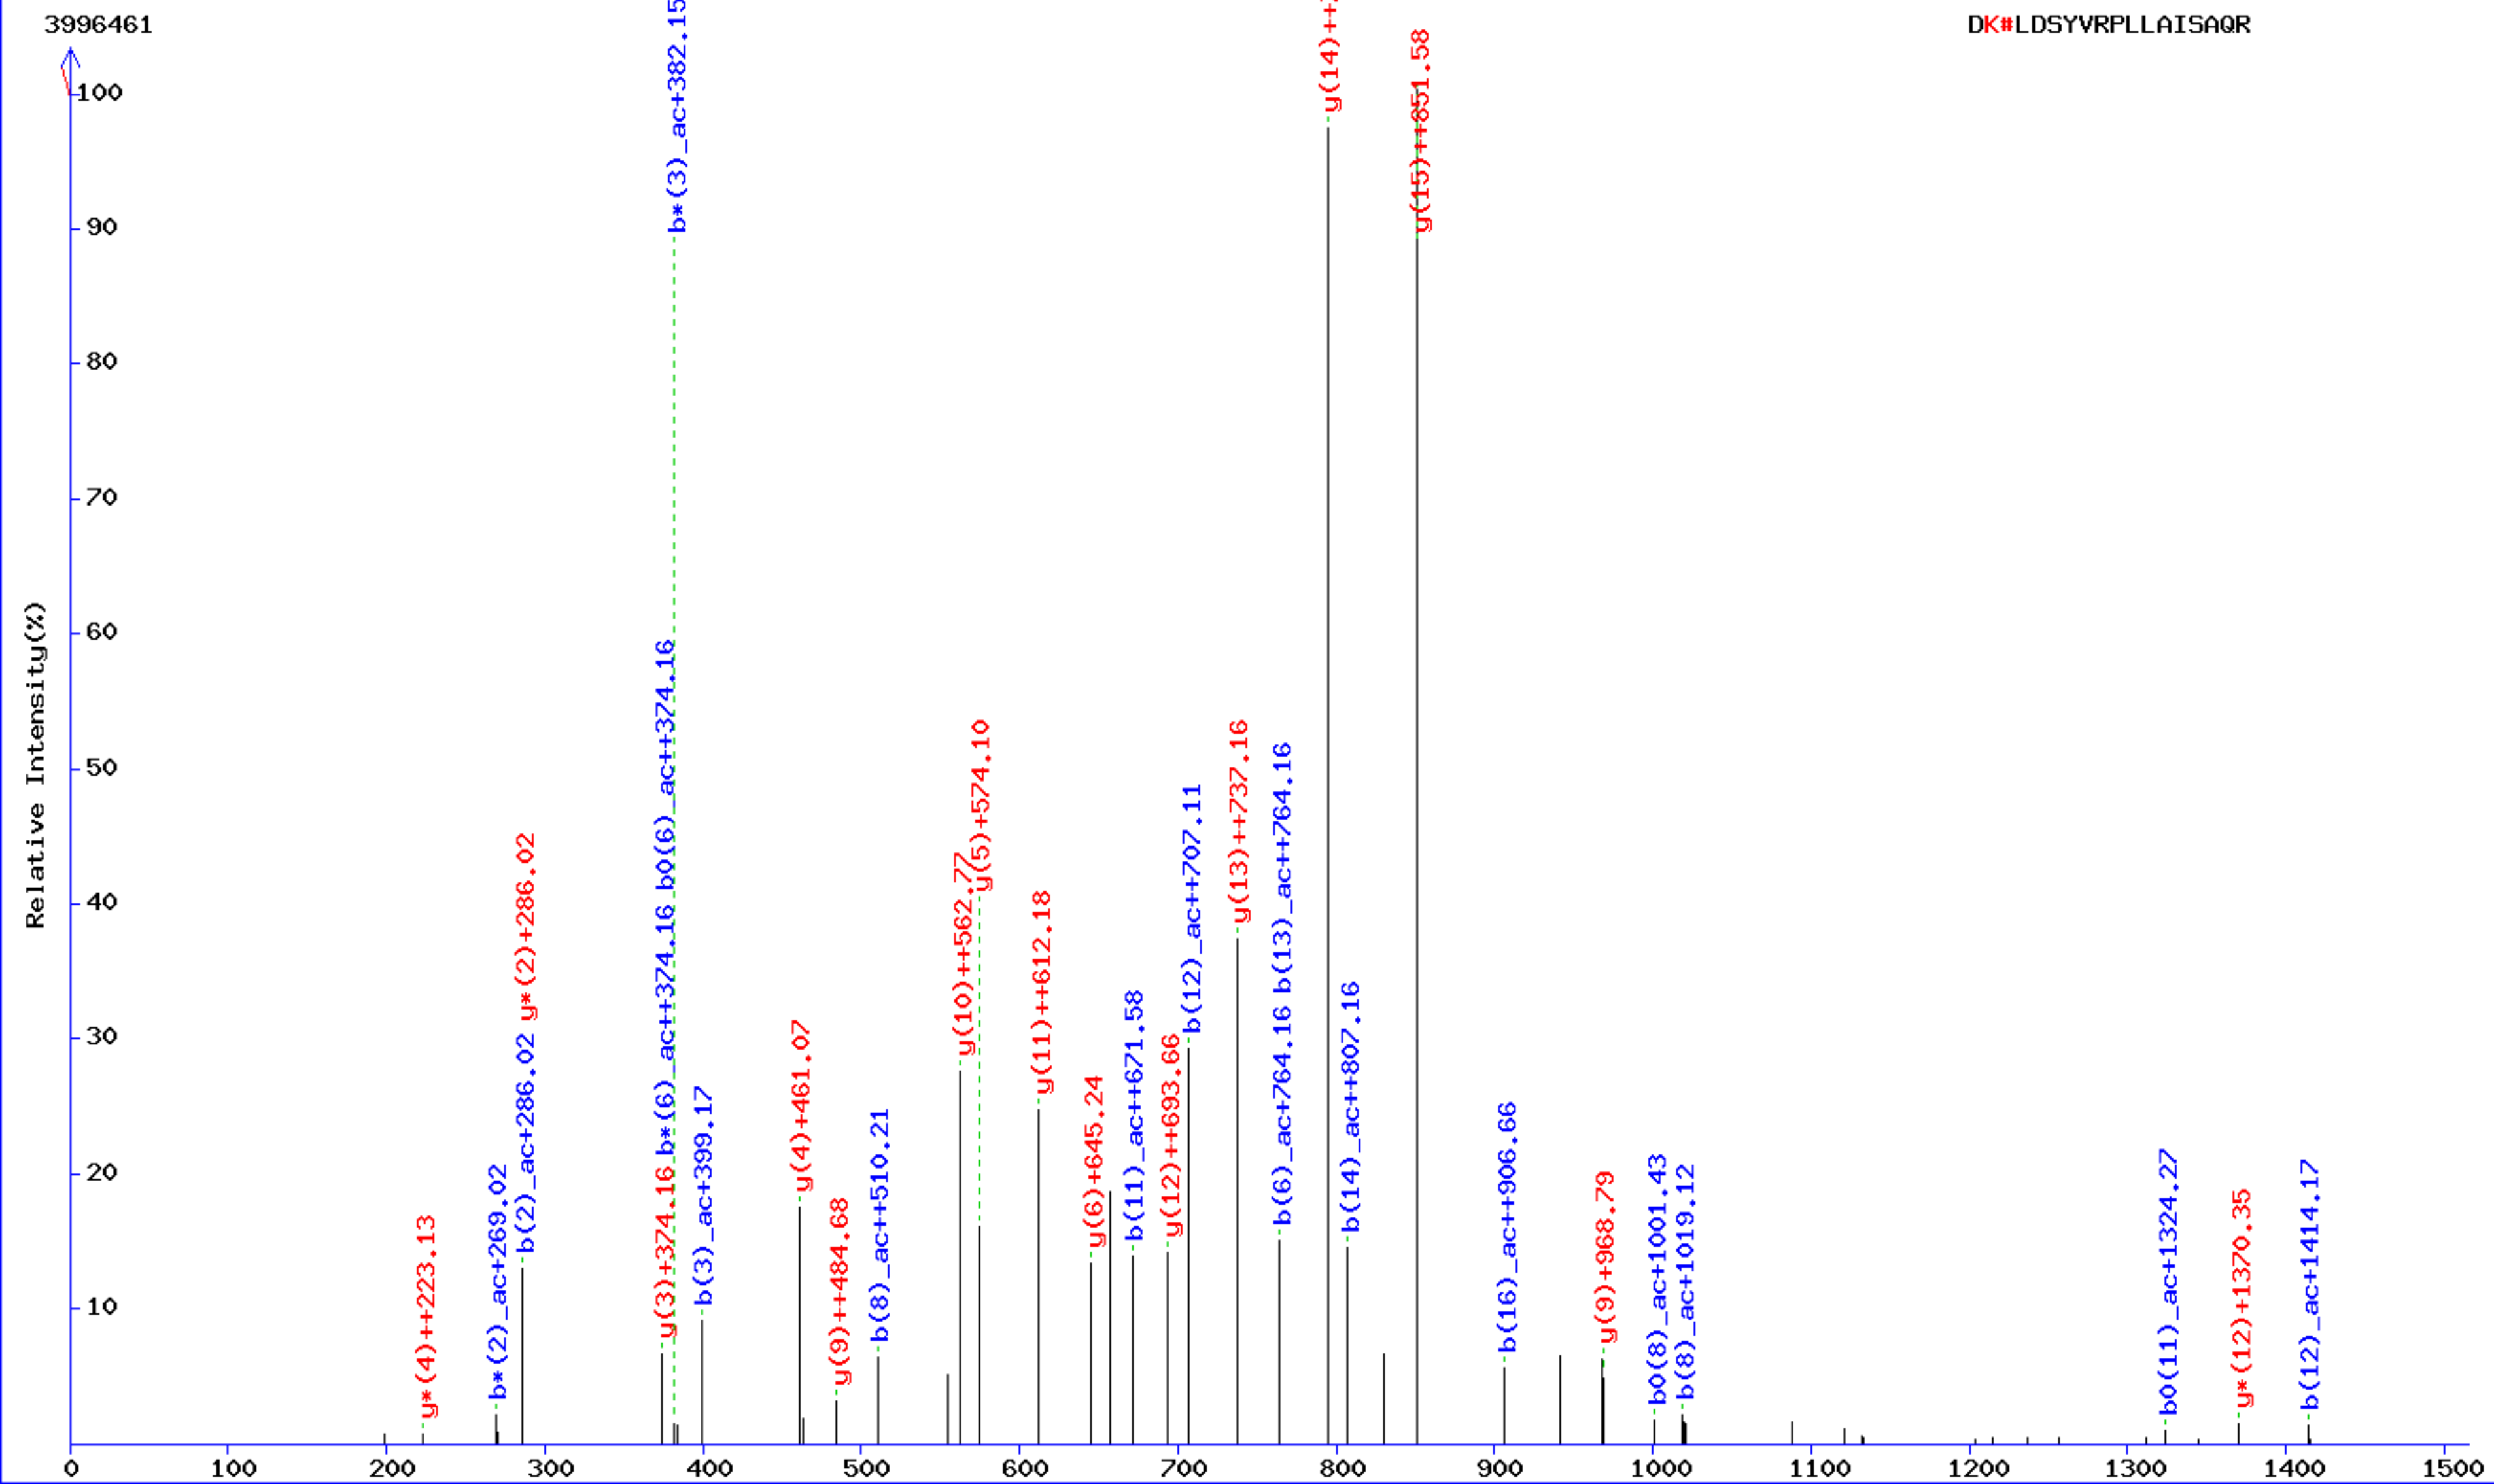

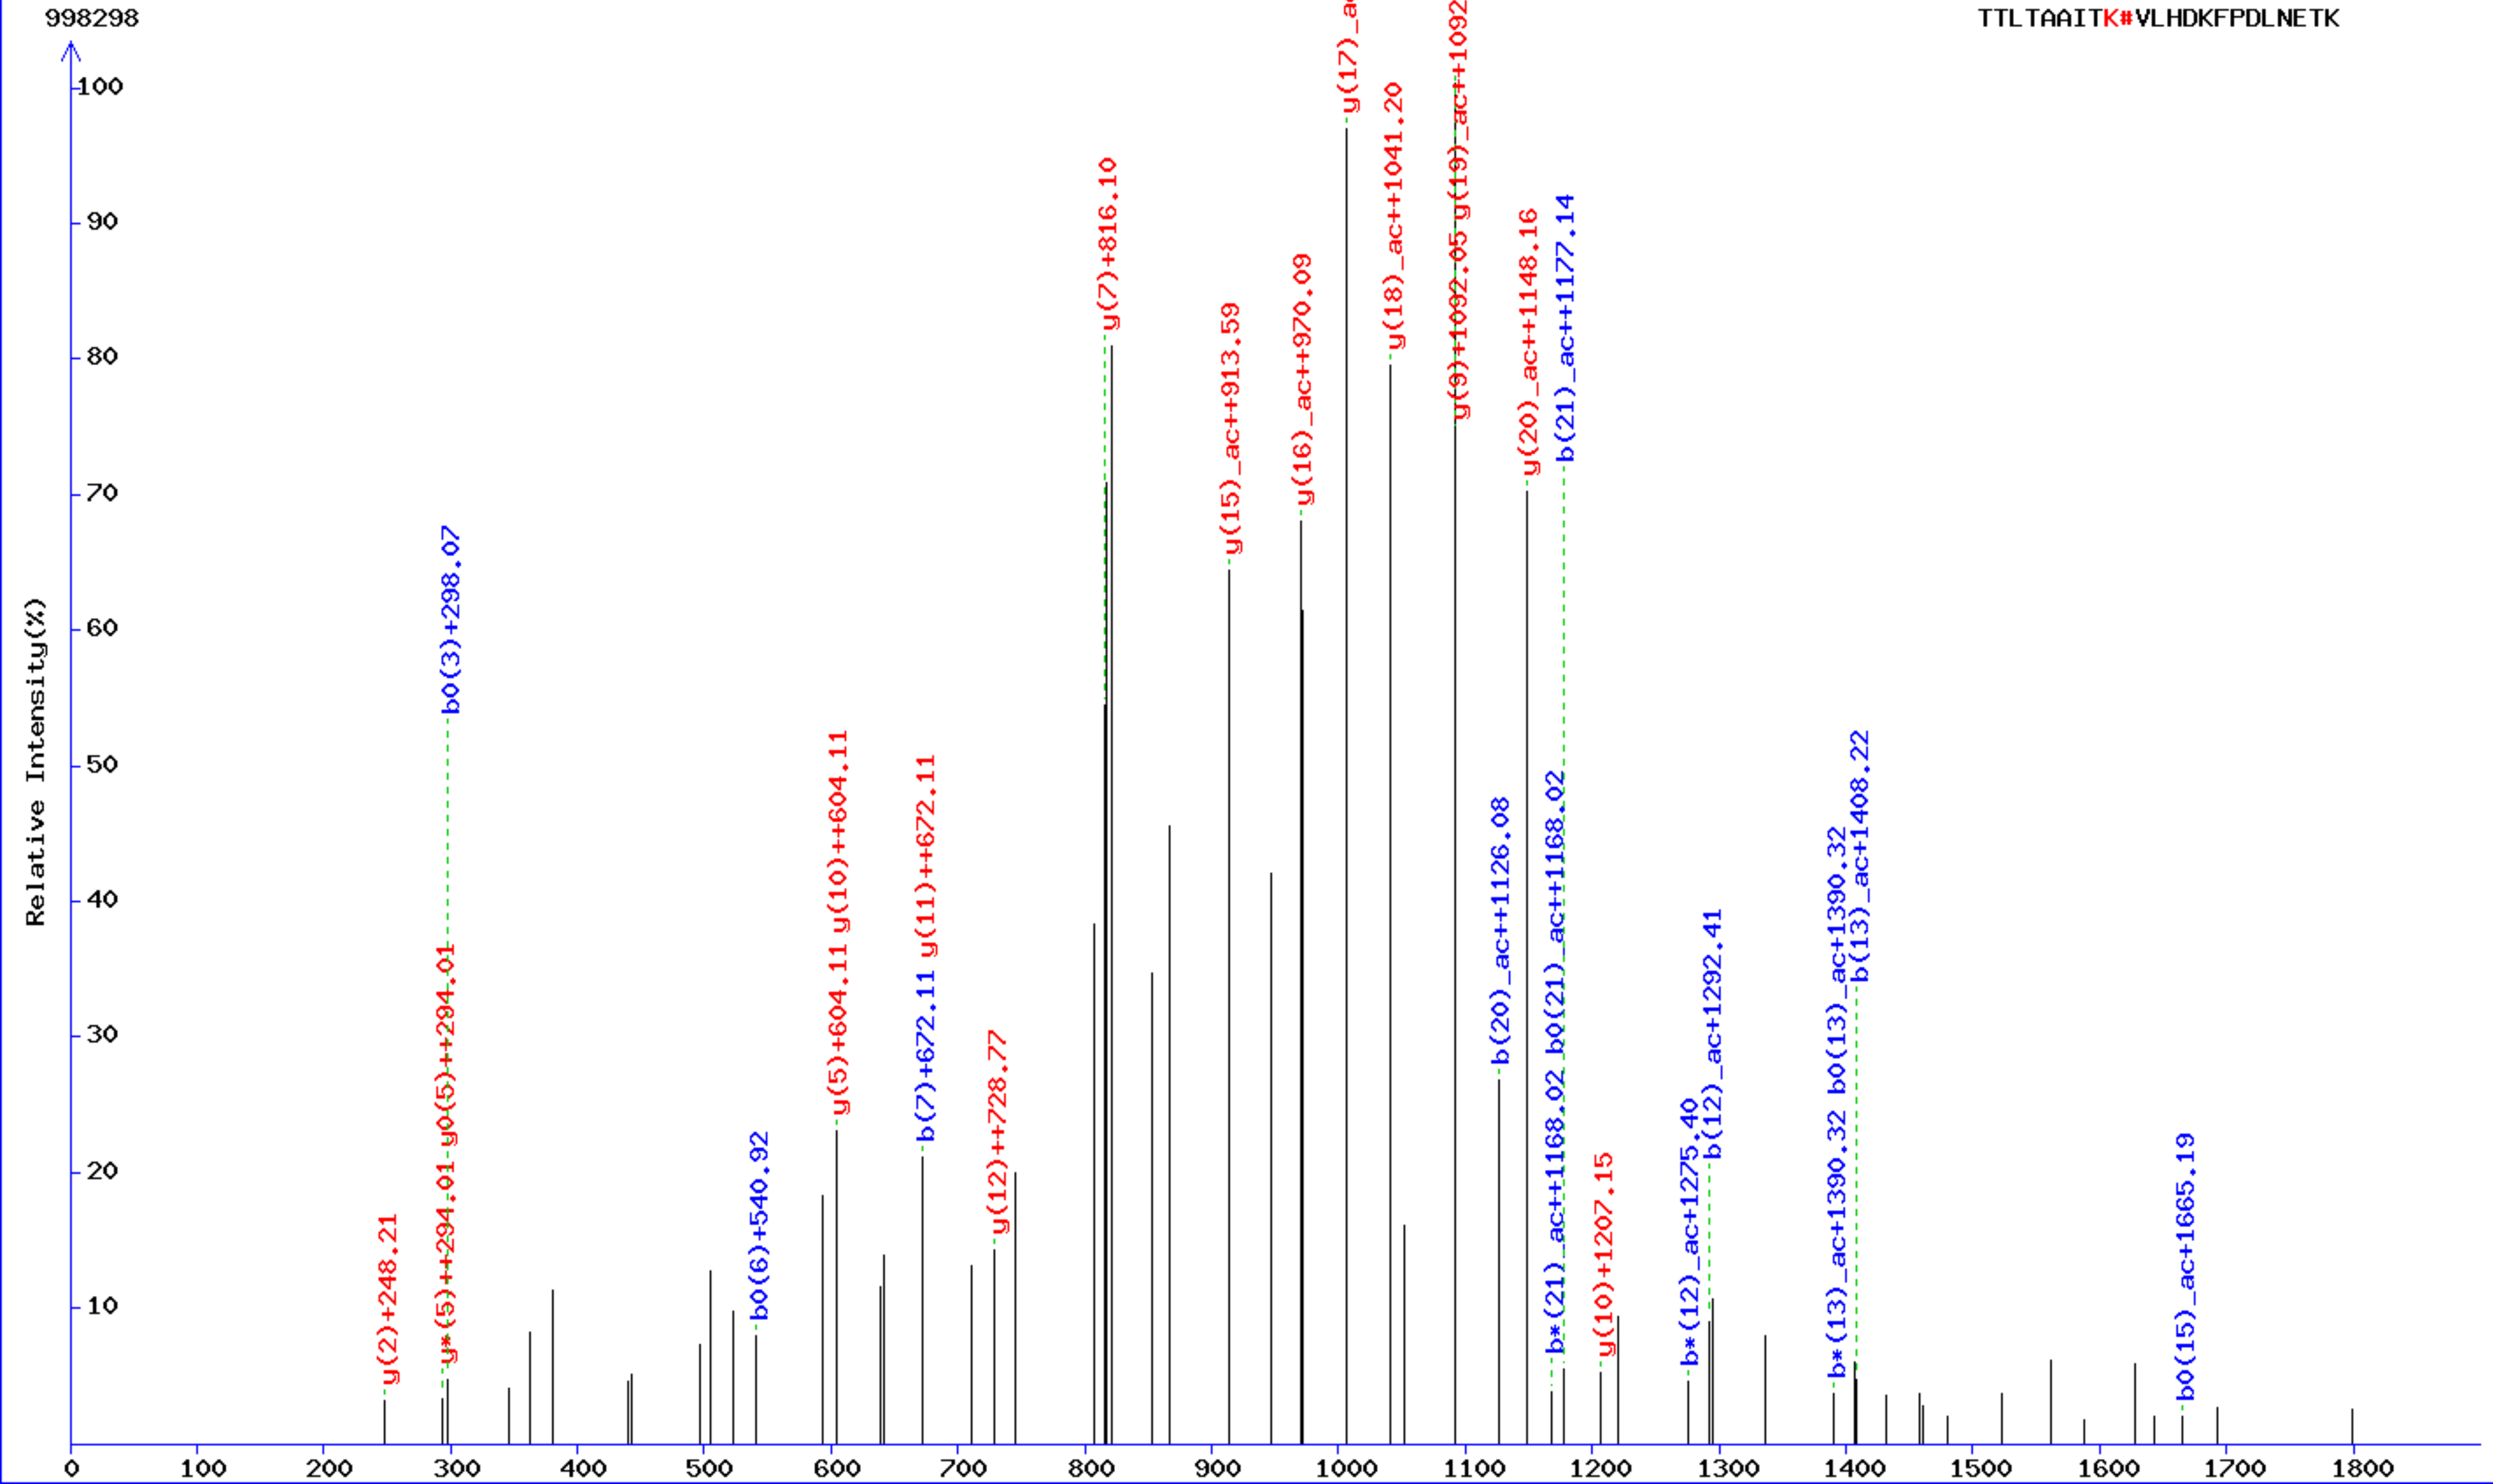



# gi|148663251 MRA\_3428A hypothetical protein

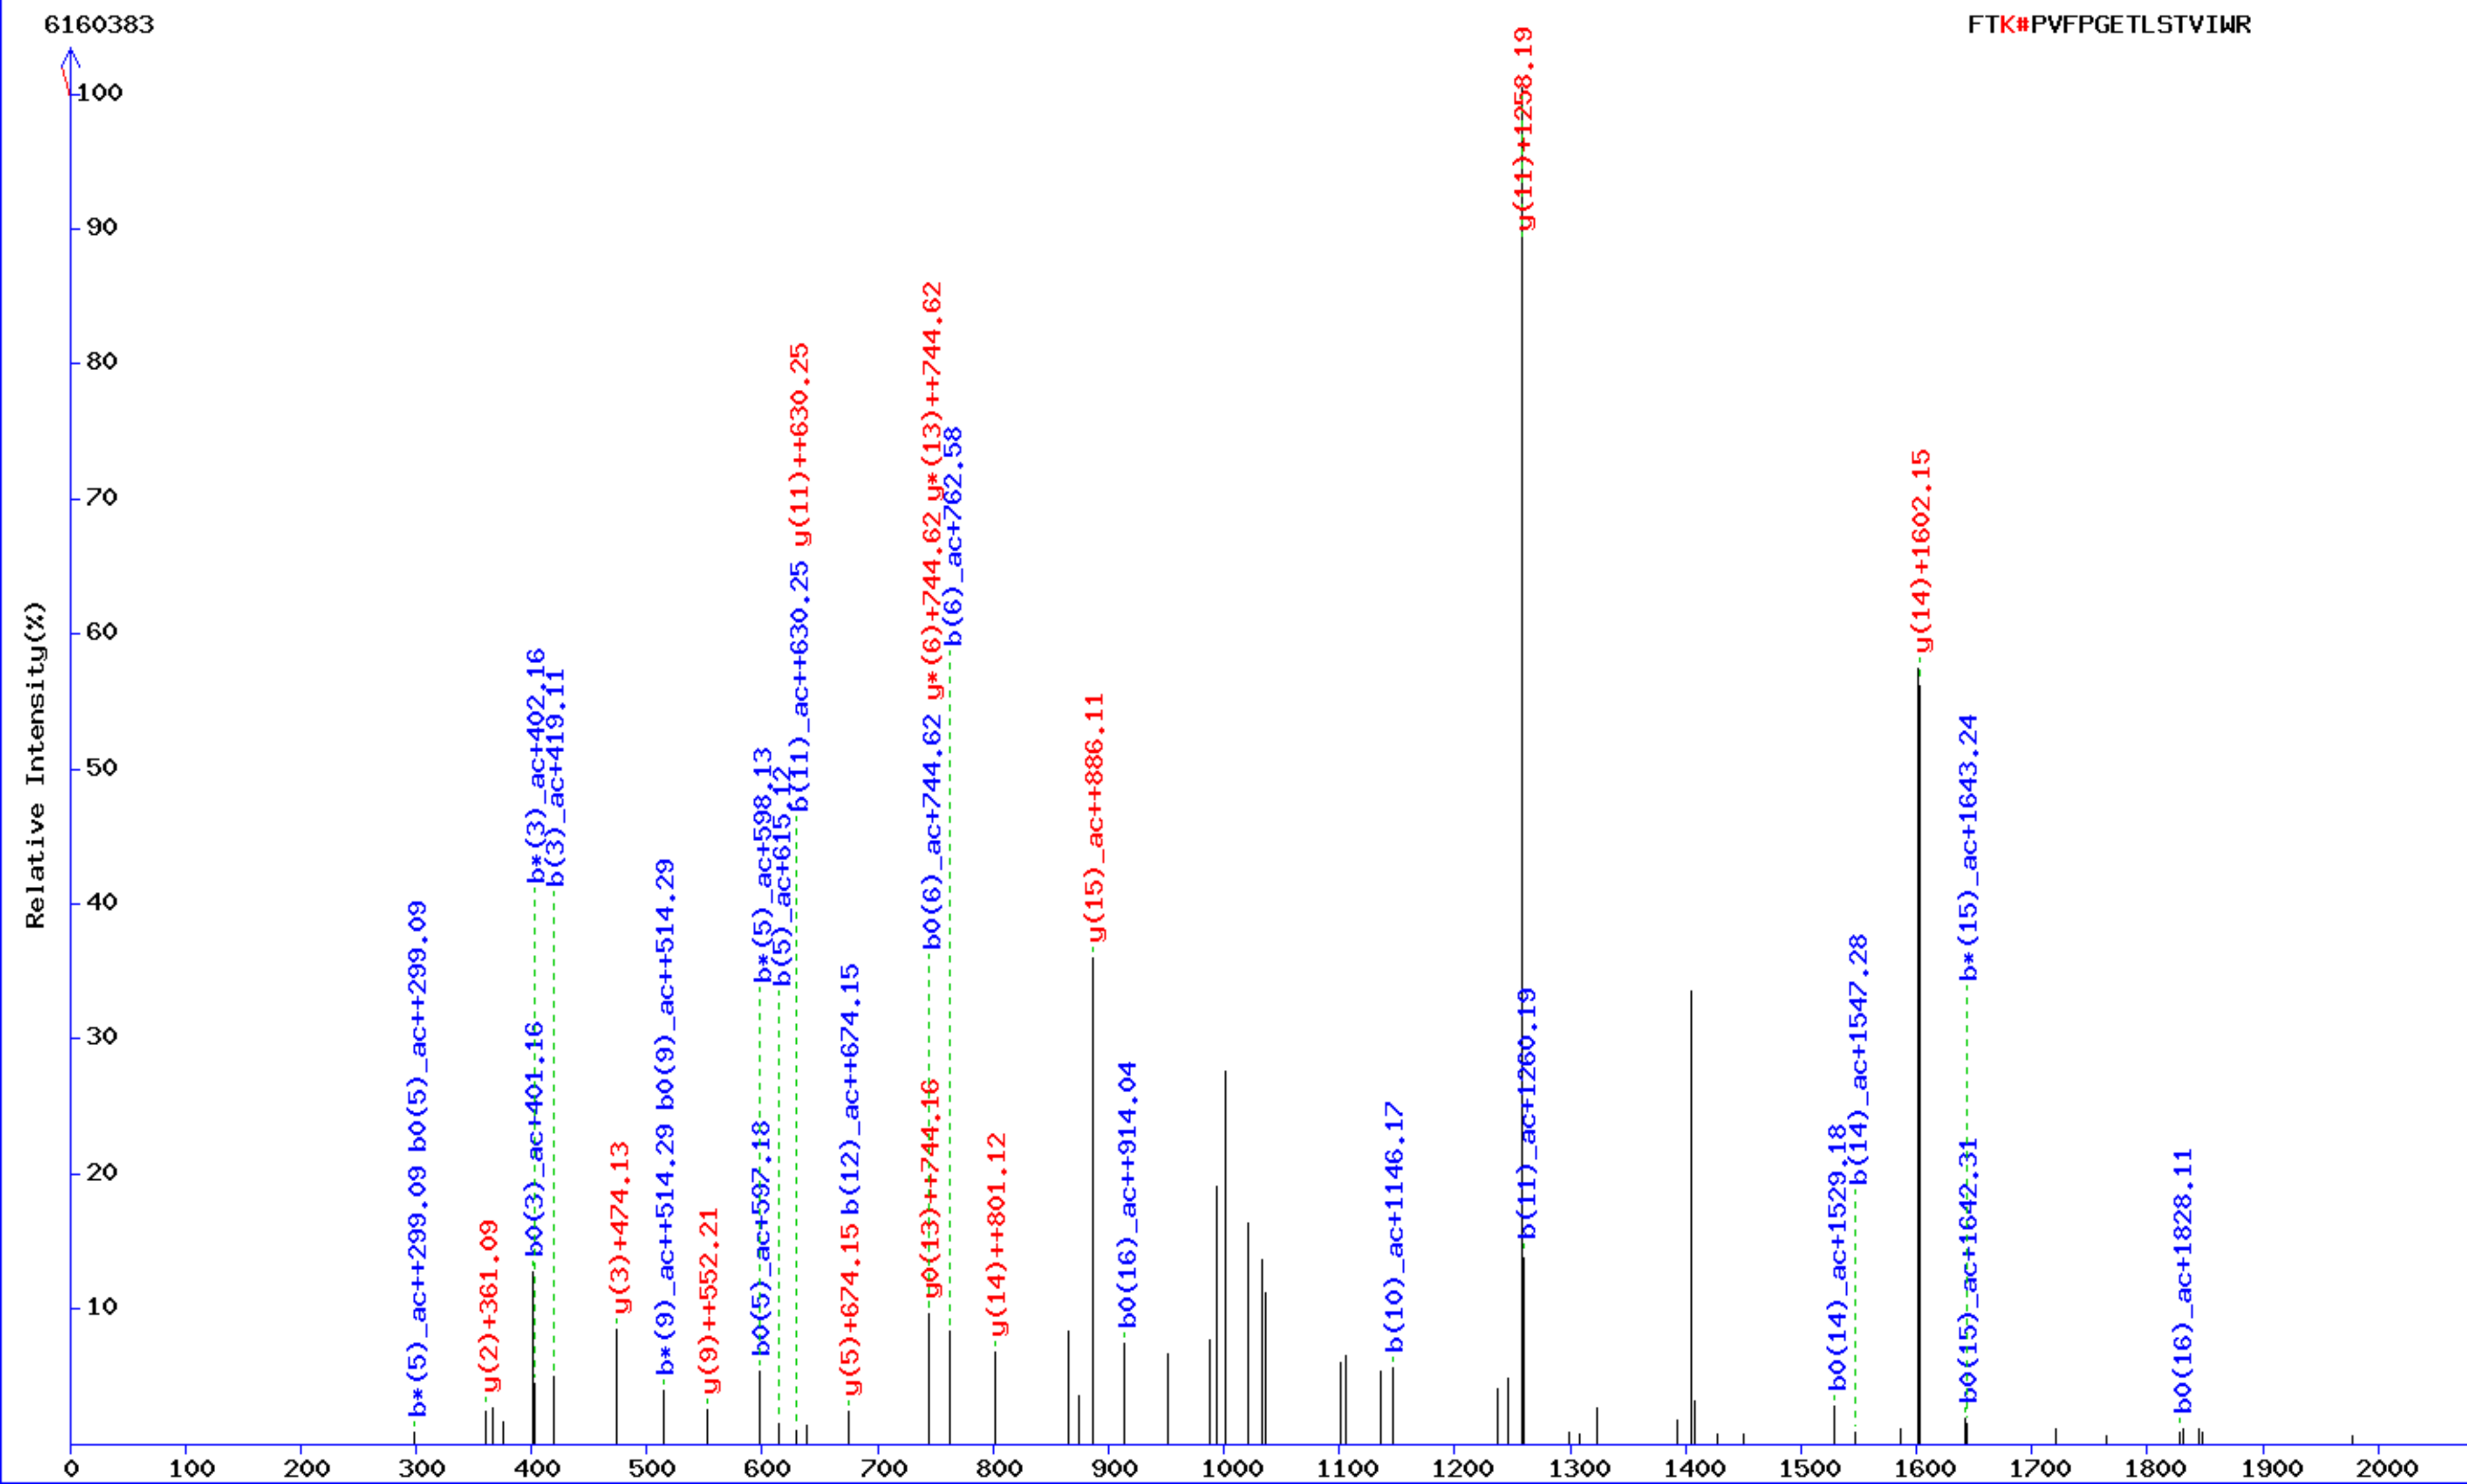

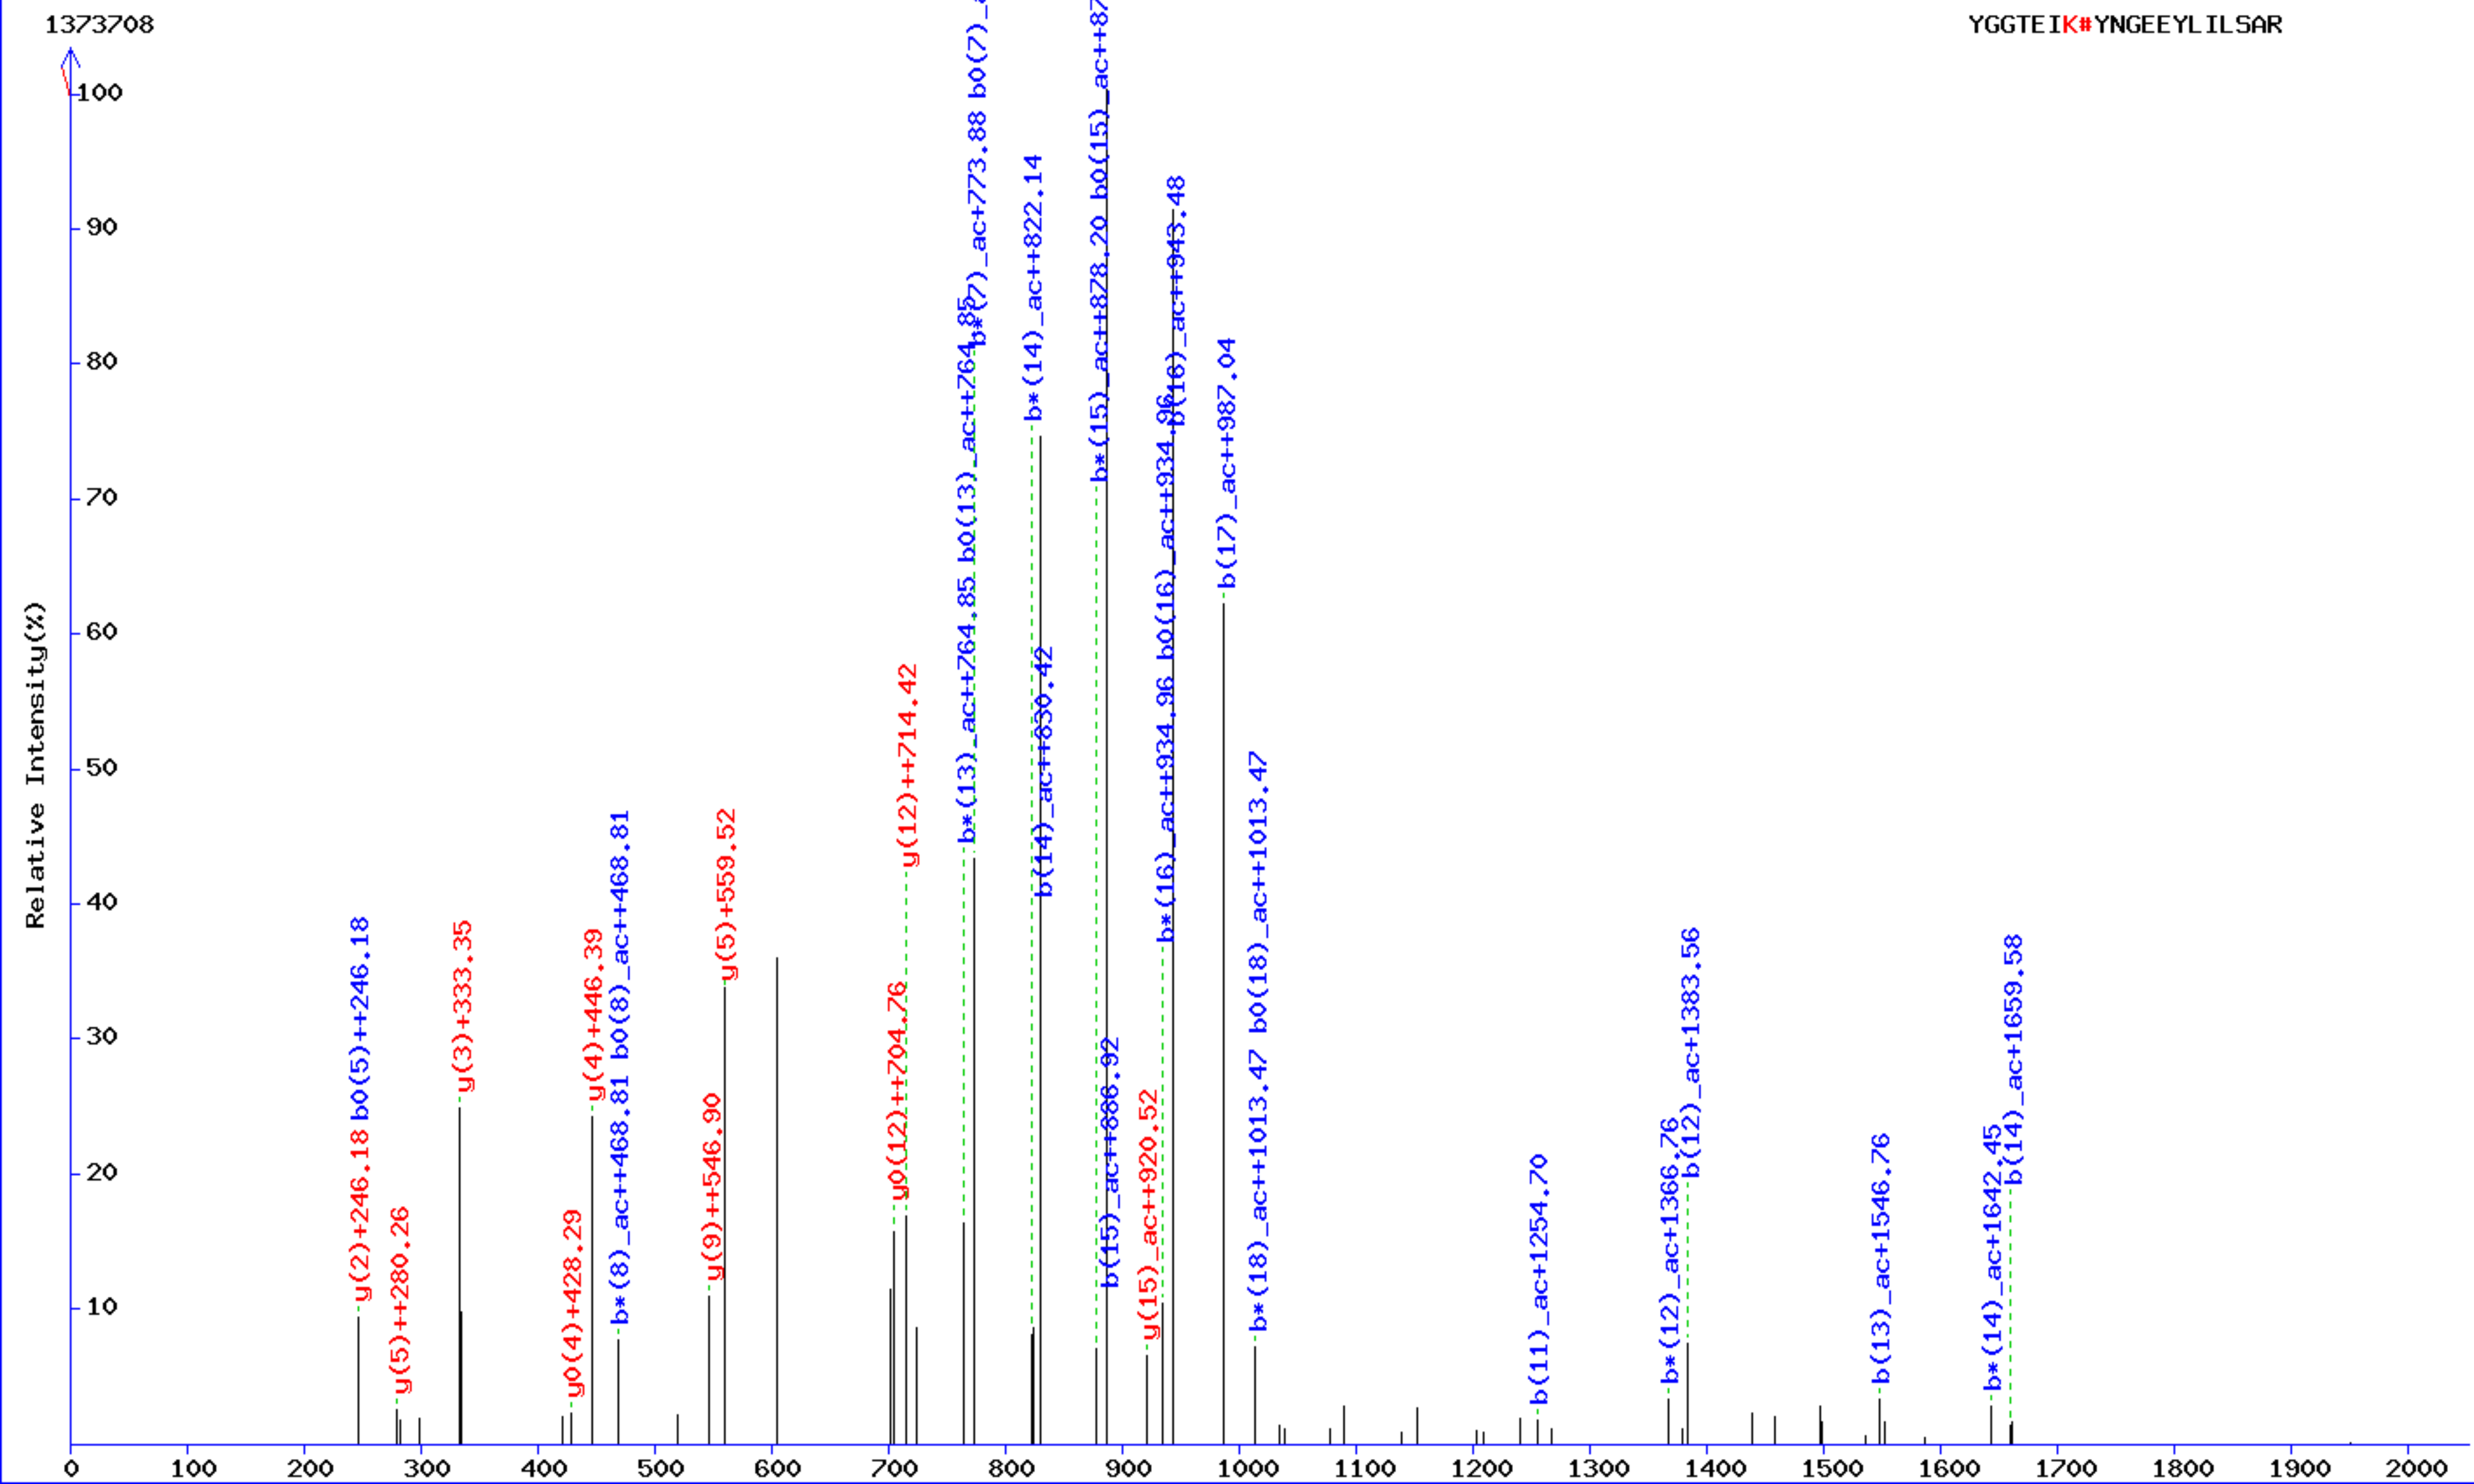

# gi|148661496 MRA\_1708 CTP synthetase

IALVGK#YVELSDAYLSVAEALR

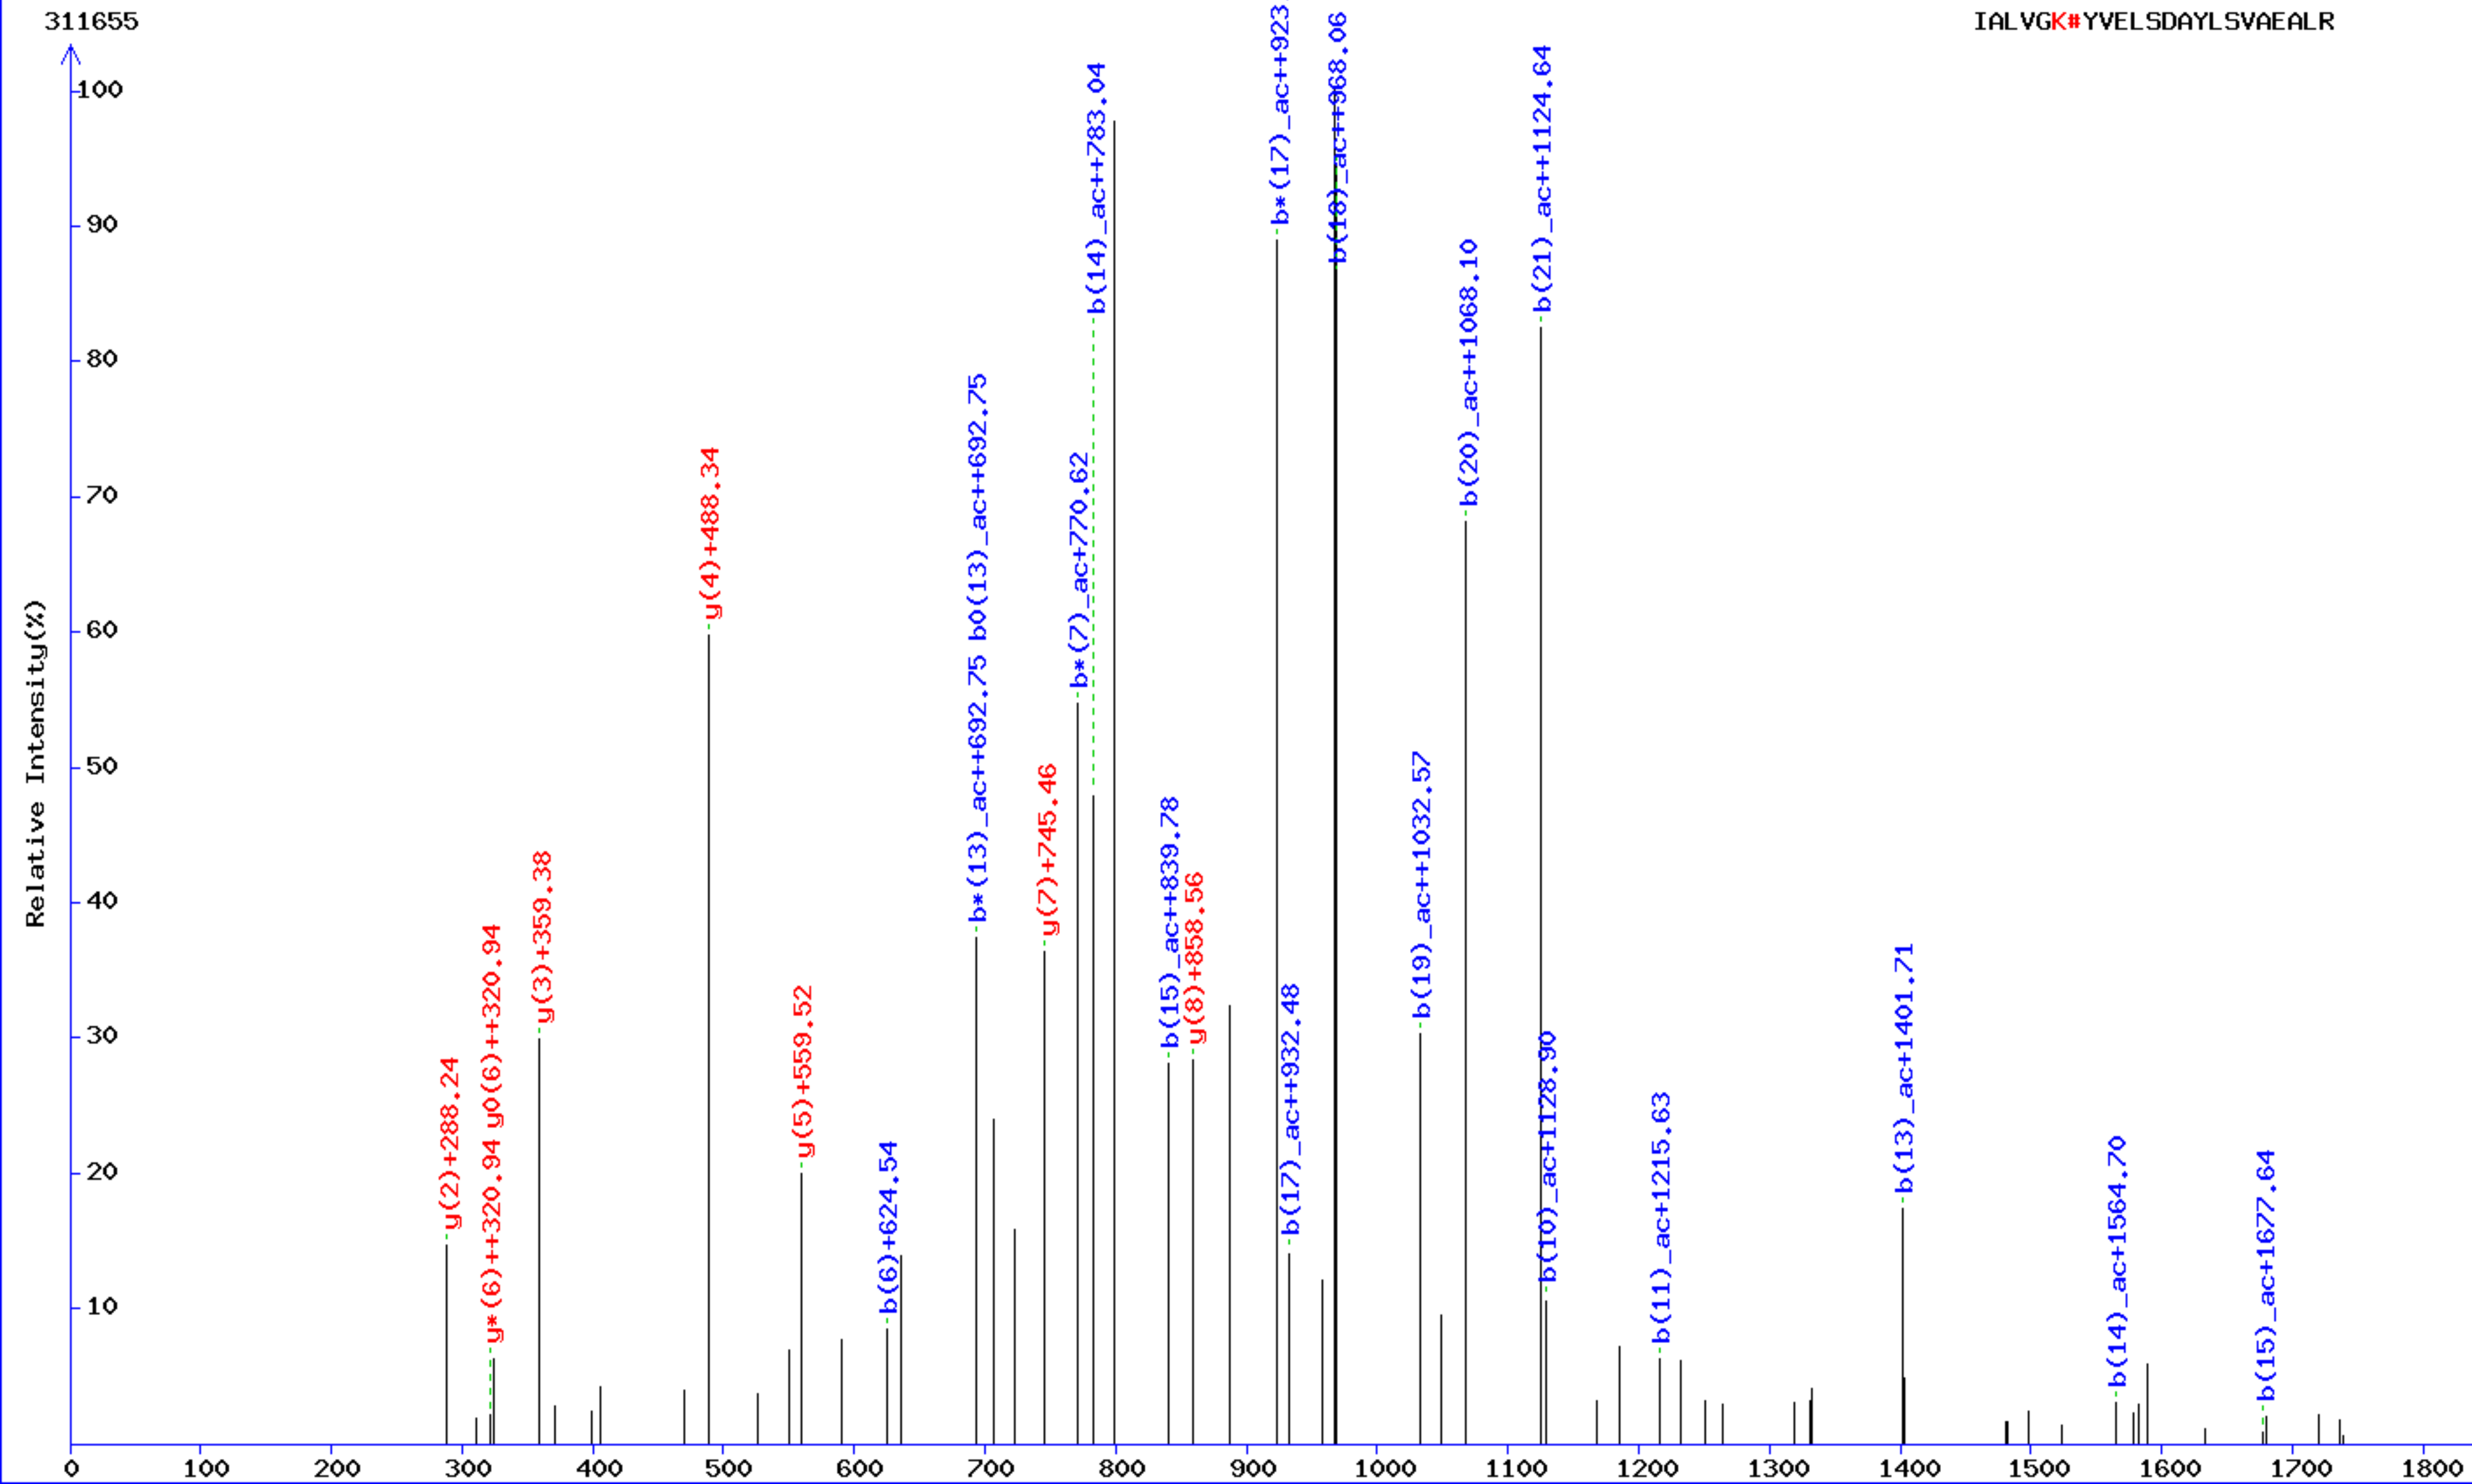

# gi|148660205 MRA\_0445 molecular chaperone GroEL

SALQNAASIAGLFLTTEAVVAD(K#)PE(K#)E(K#)

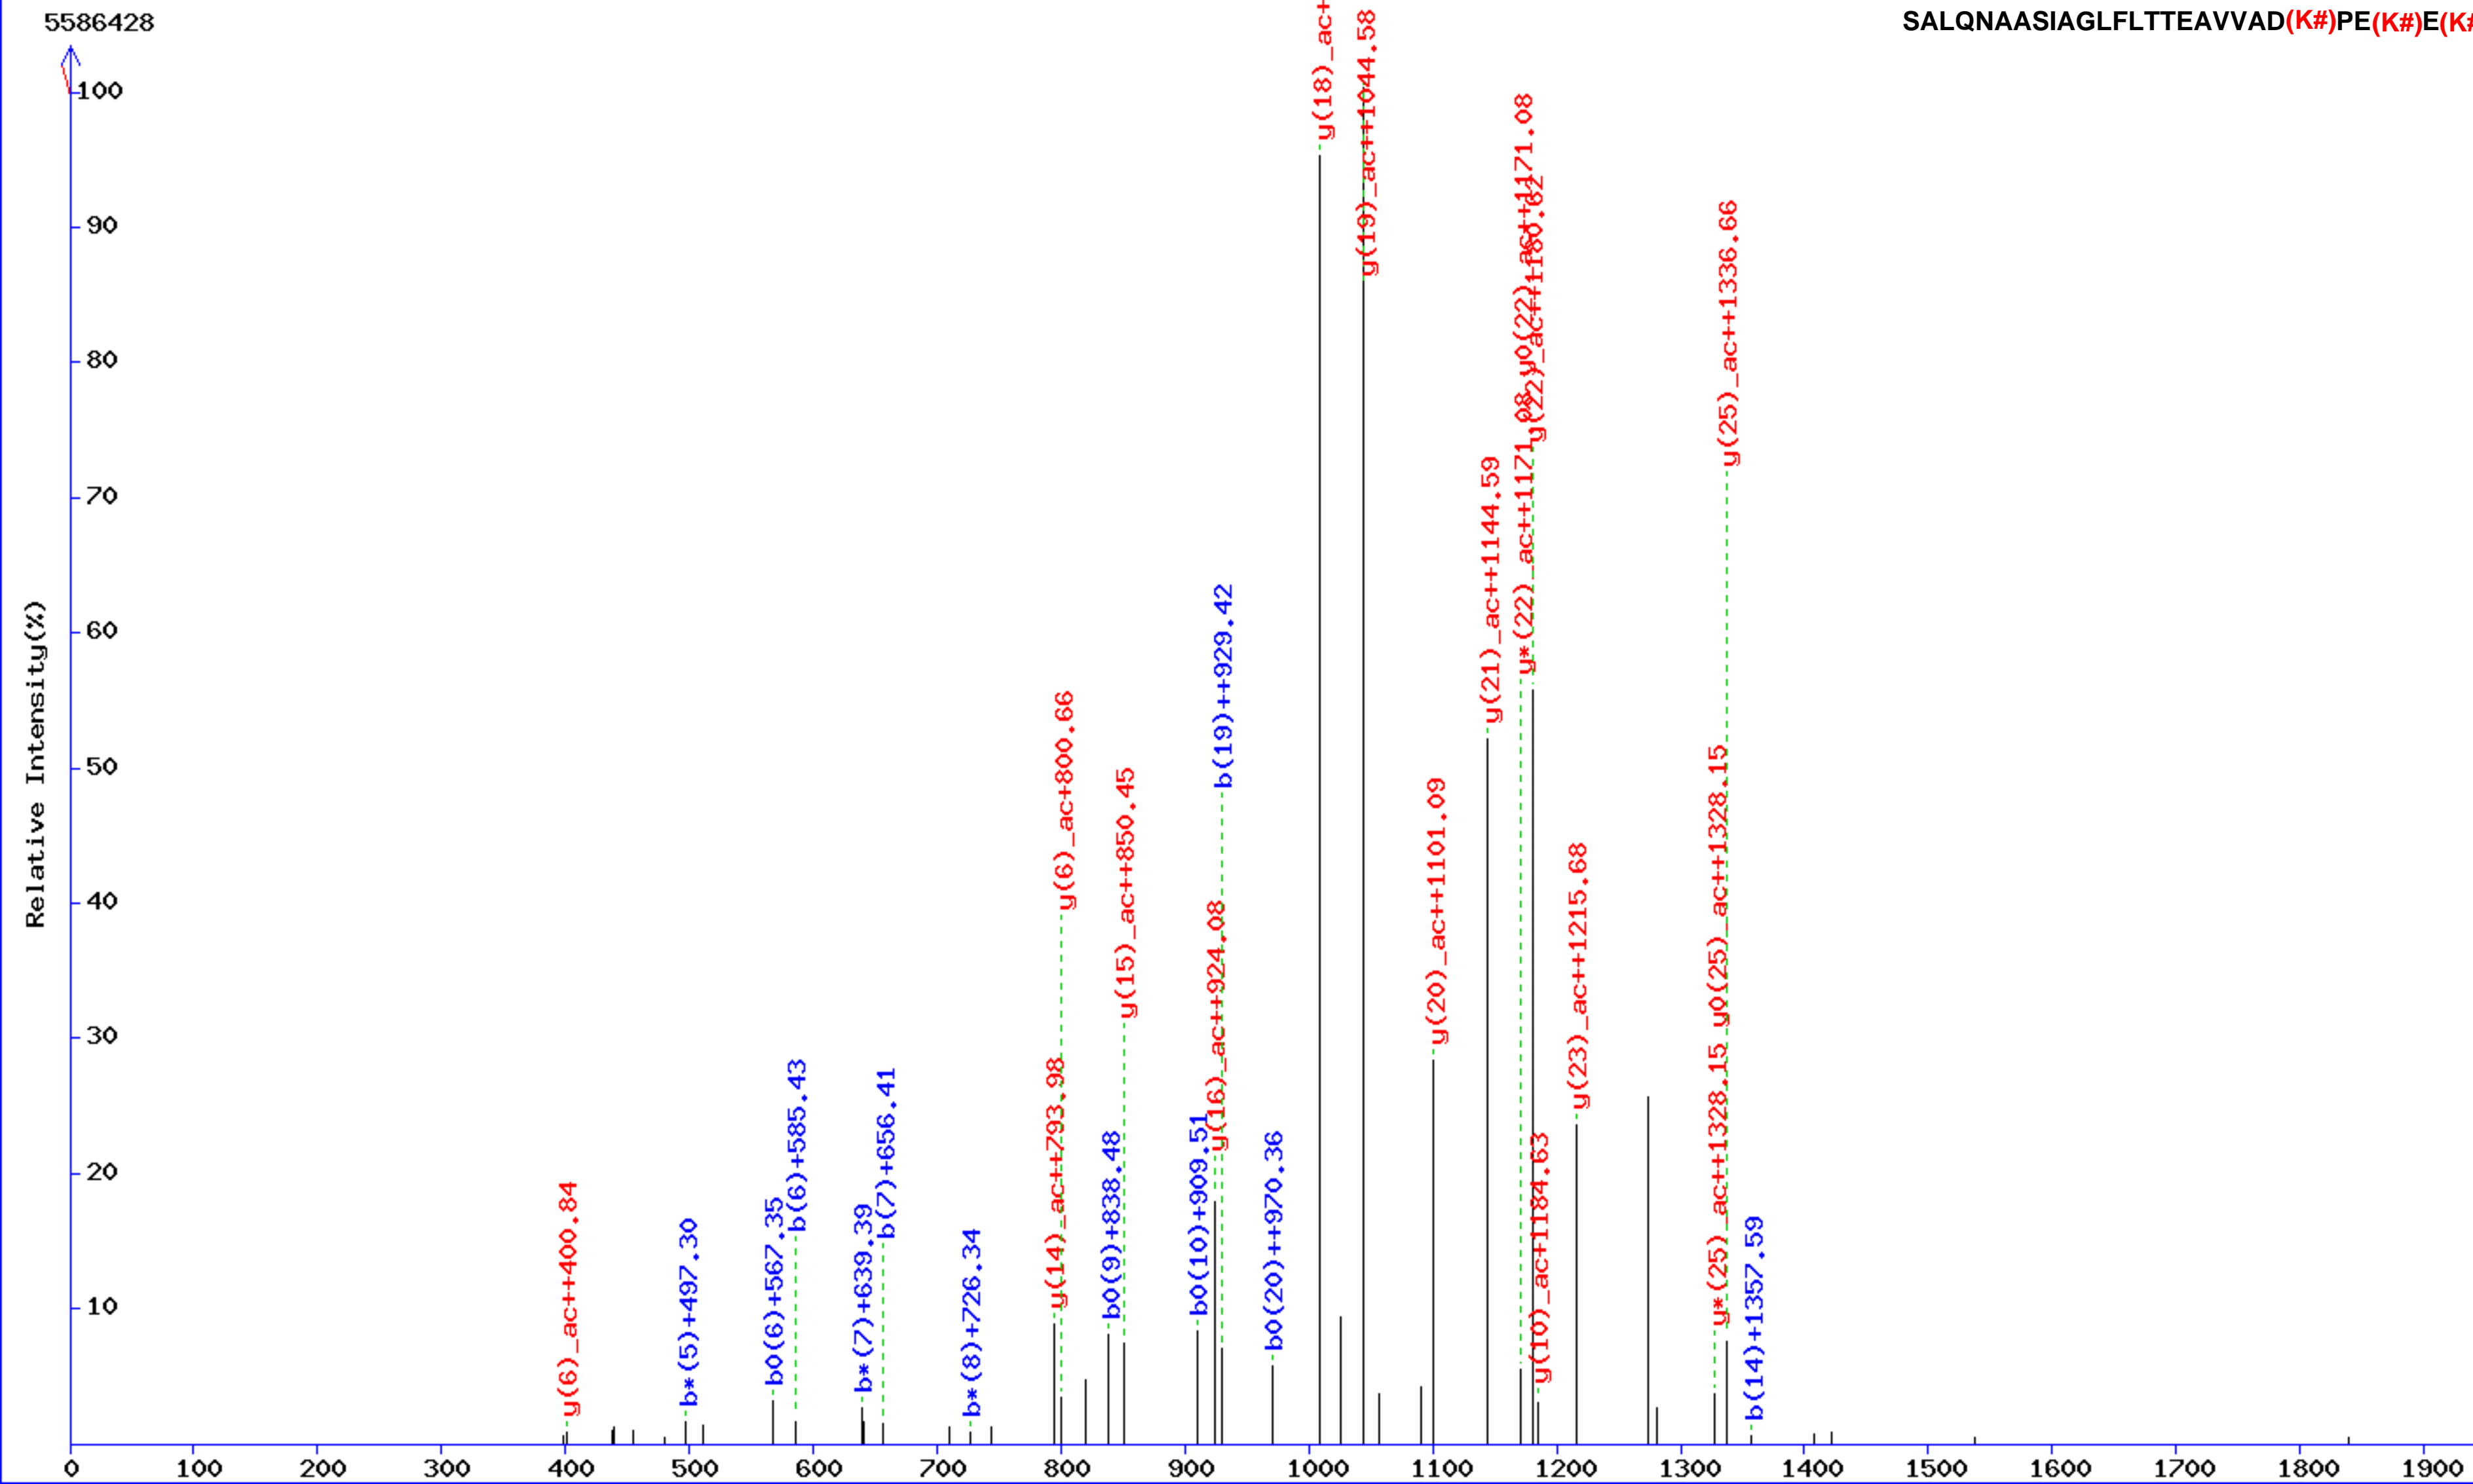

# gi|148660205 MRA\_0445 molecular chaperone GroEL

SALQNAASIAGLFLTTEAVVADKPE(K#)E(K#)

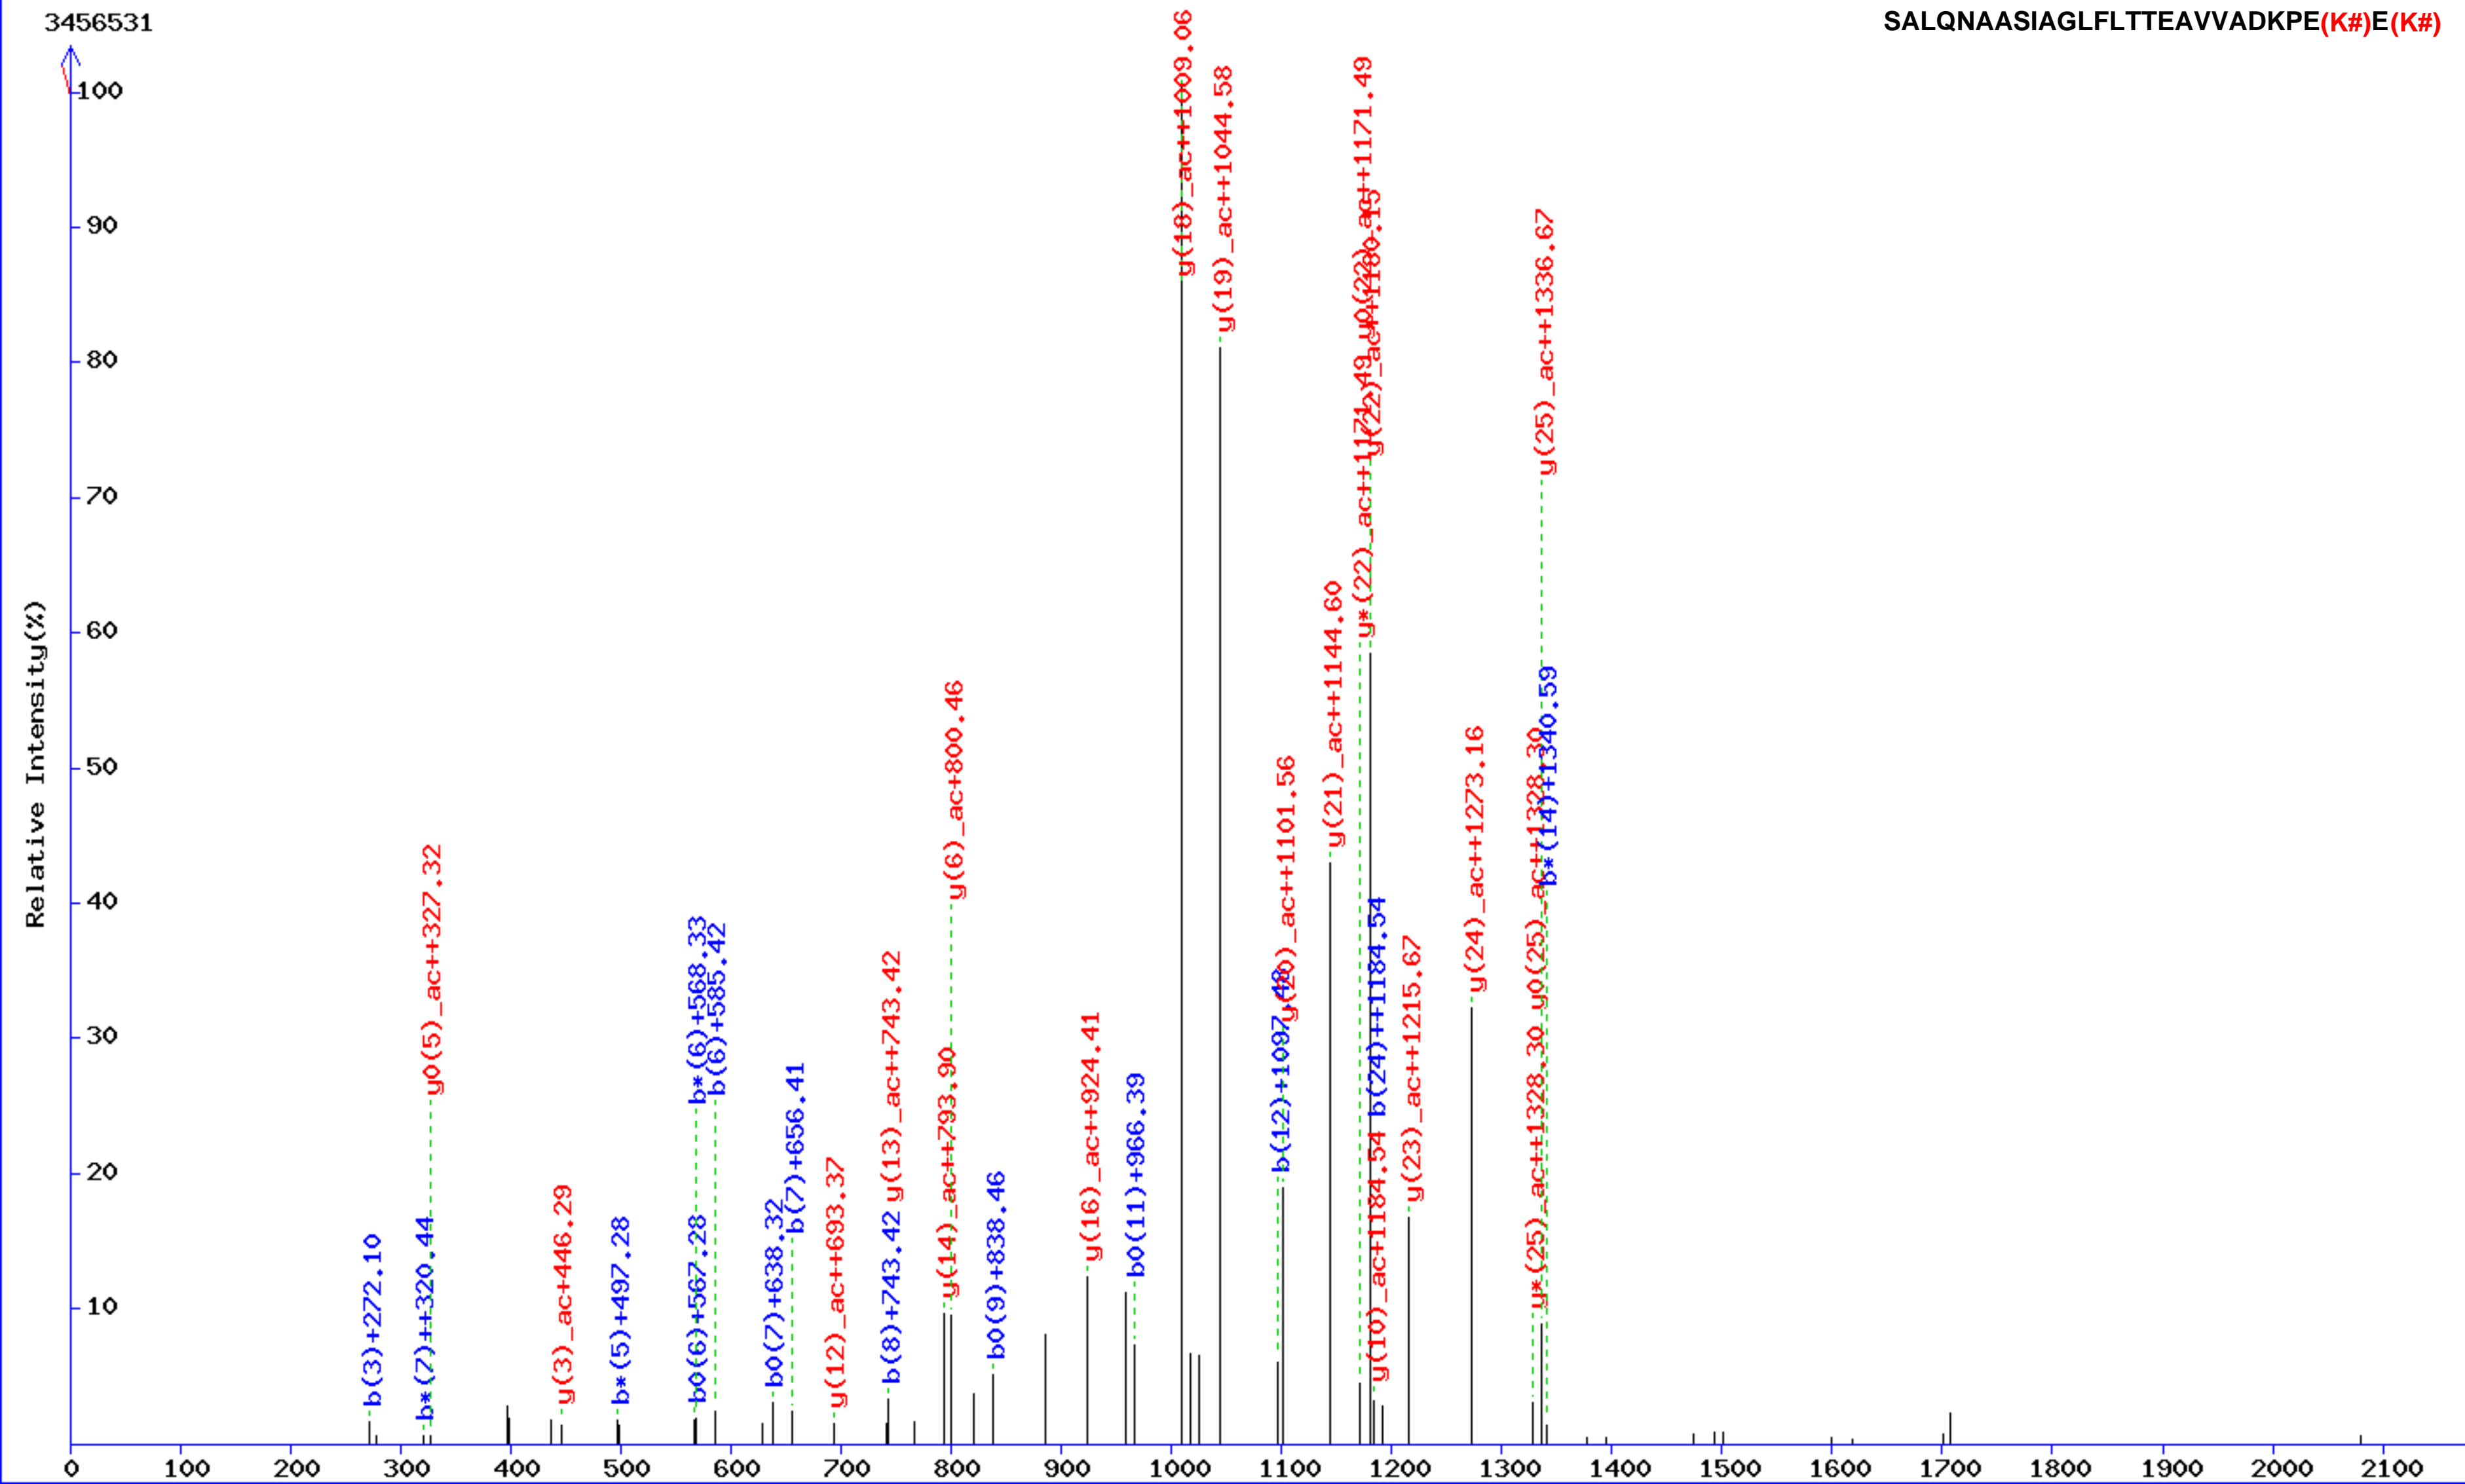

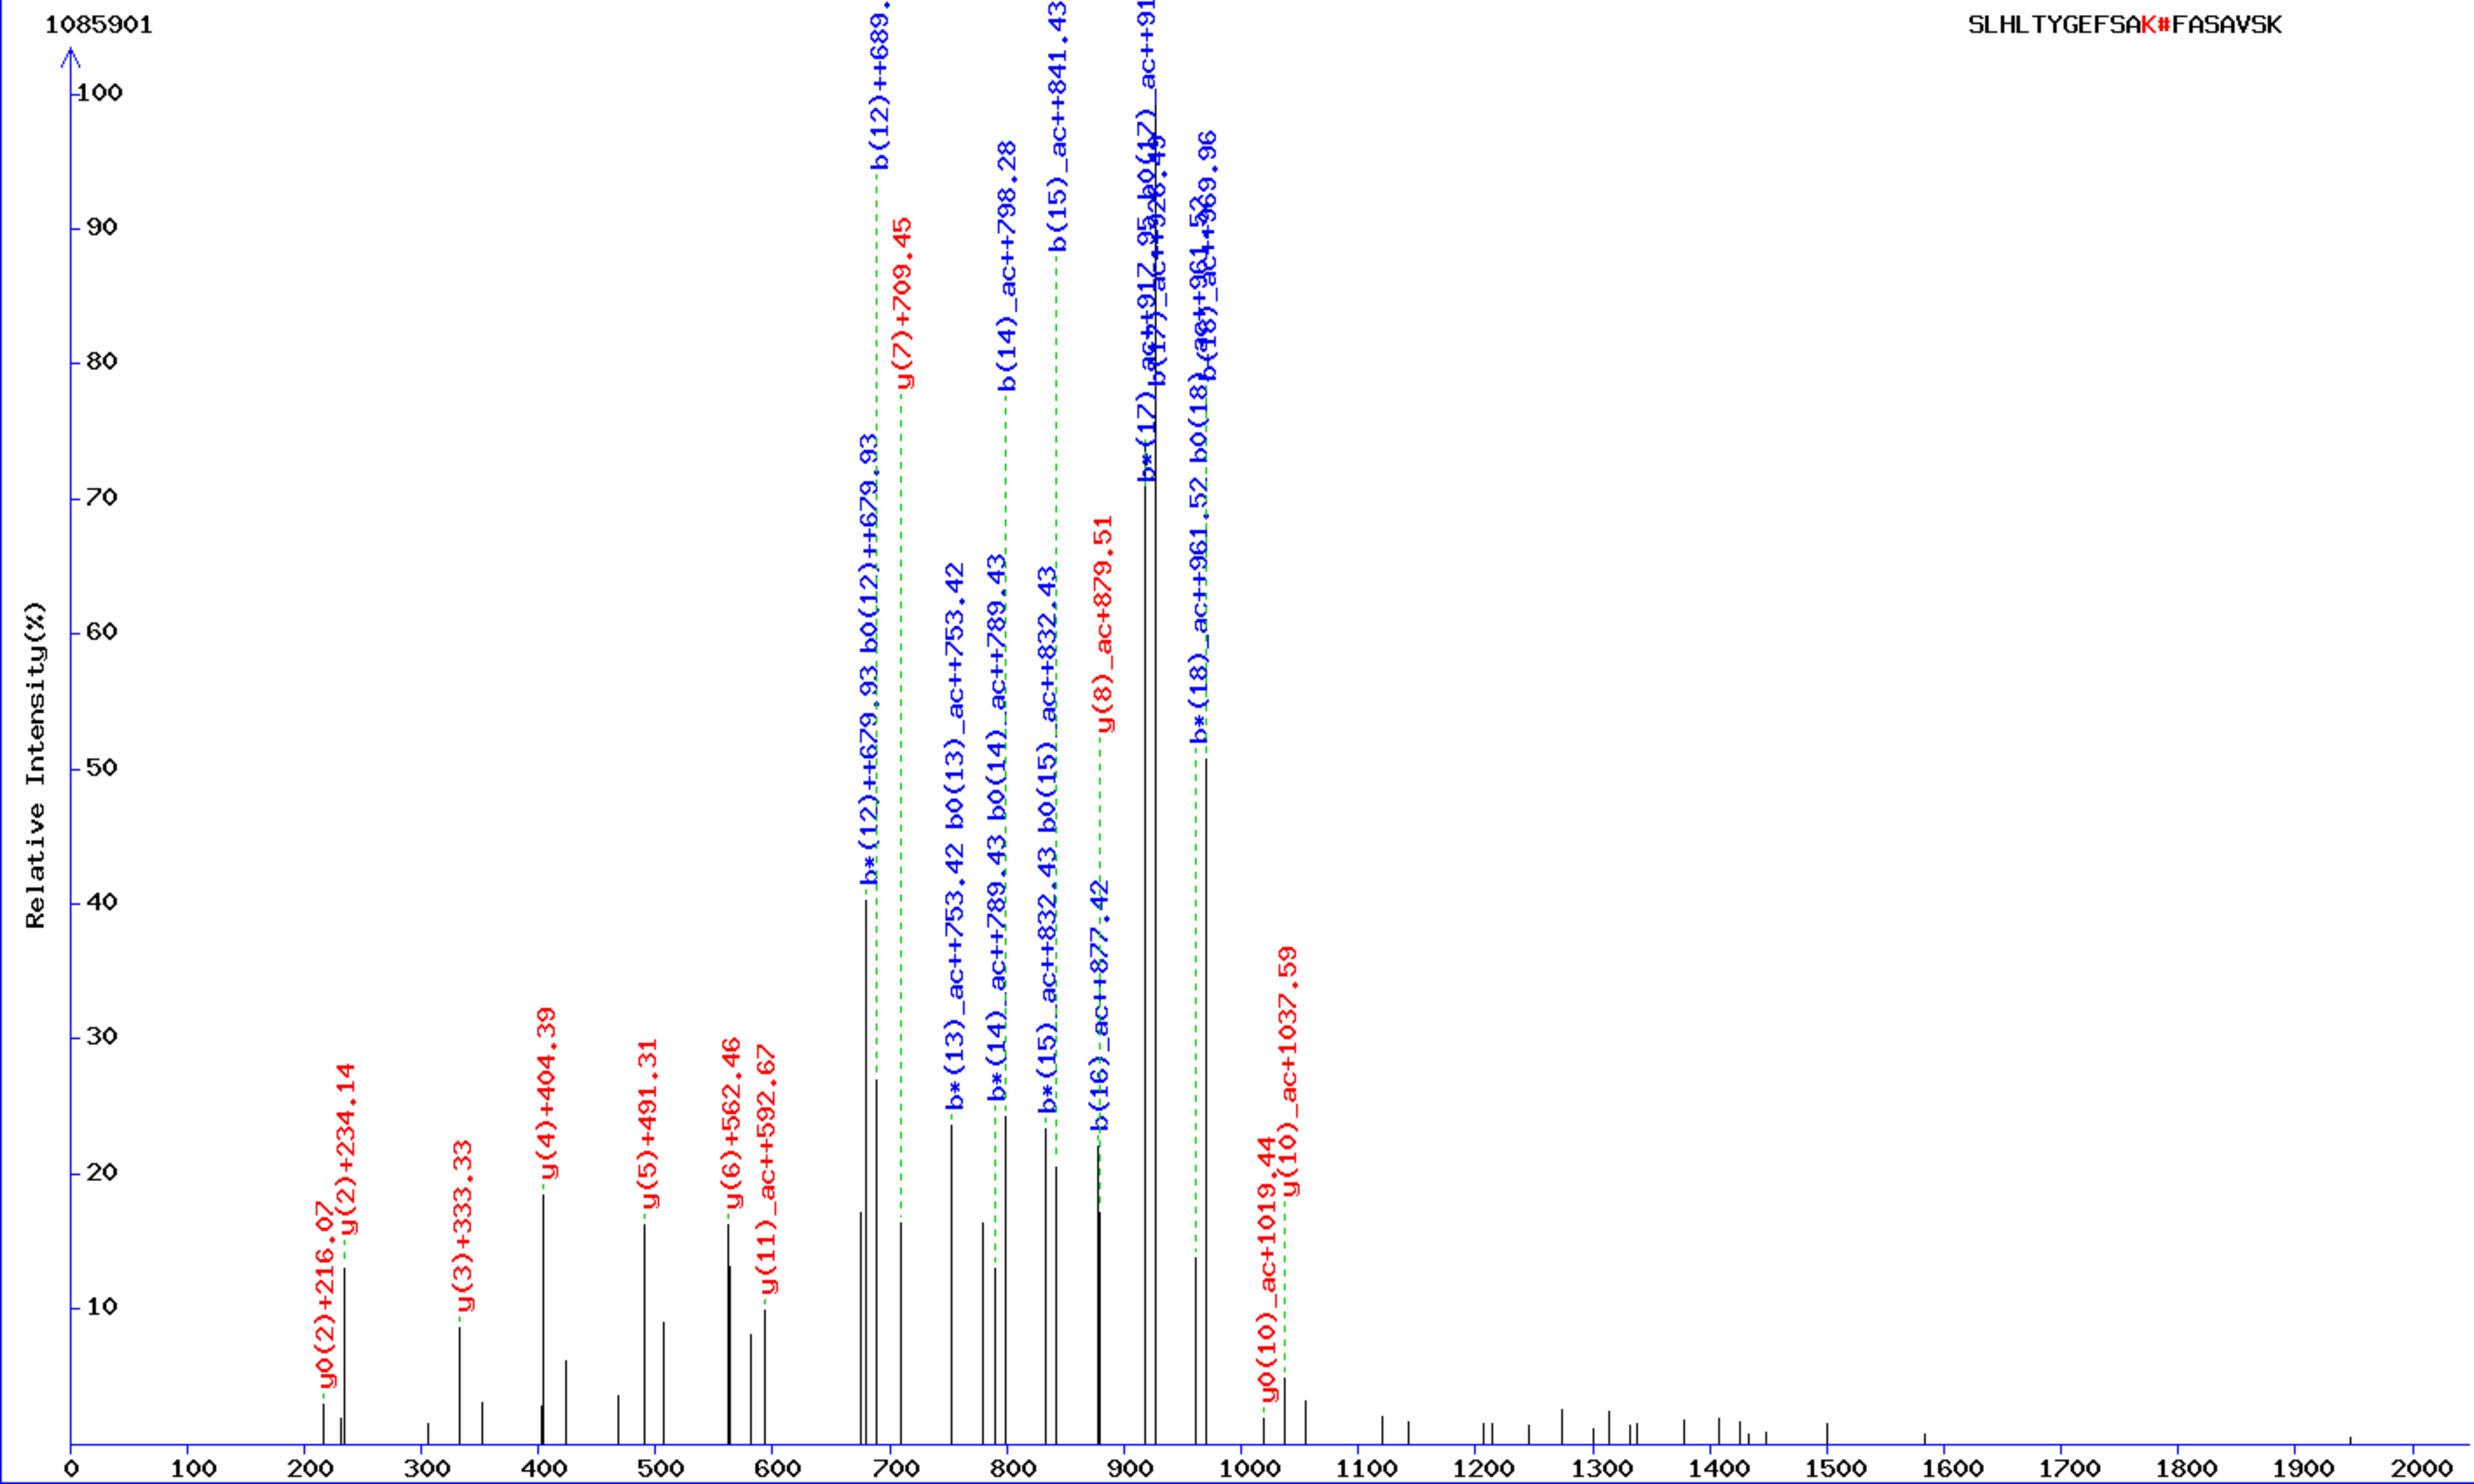

# gi|148660205 MRA\_0445 molecular chaperone GroEL

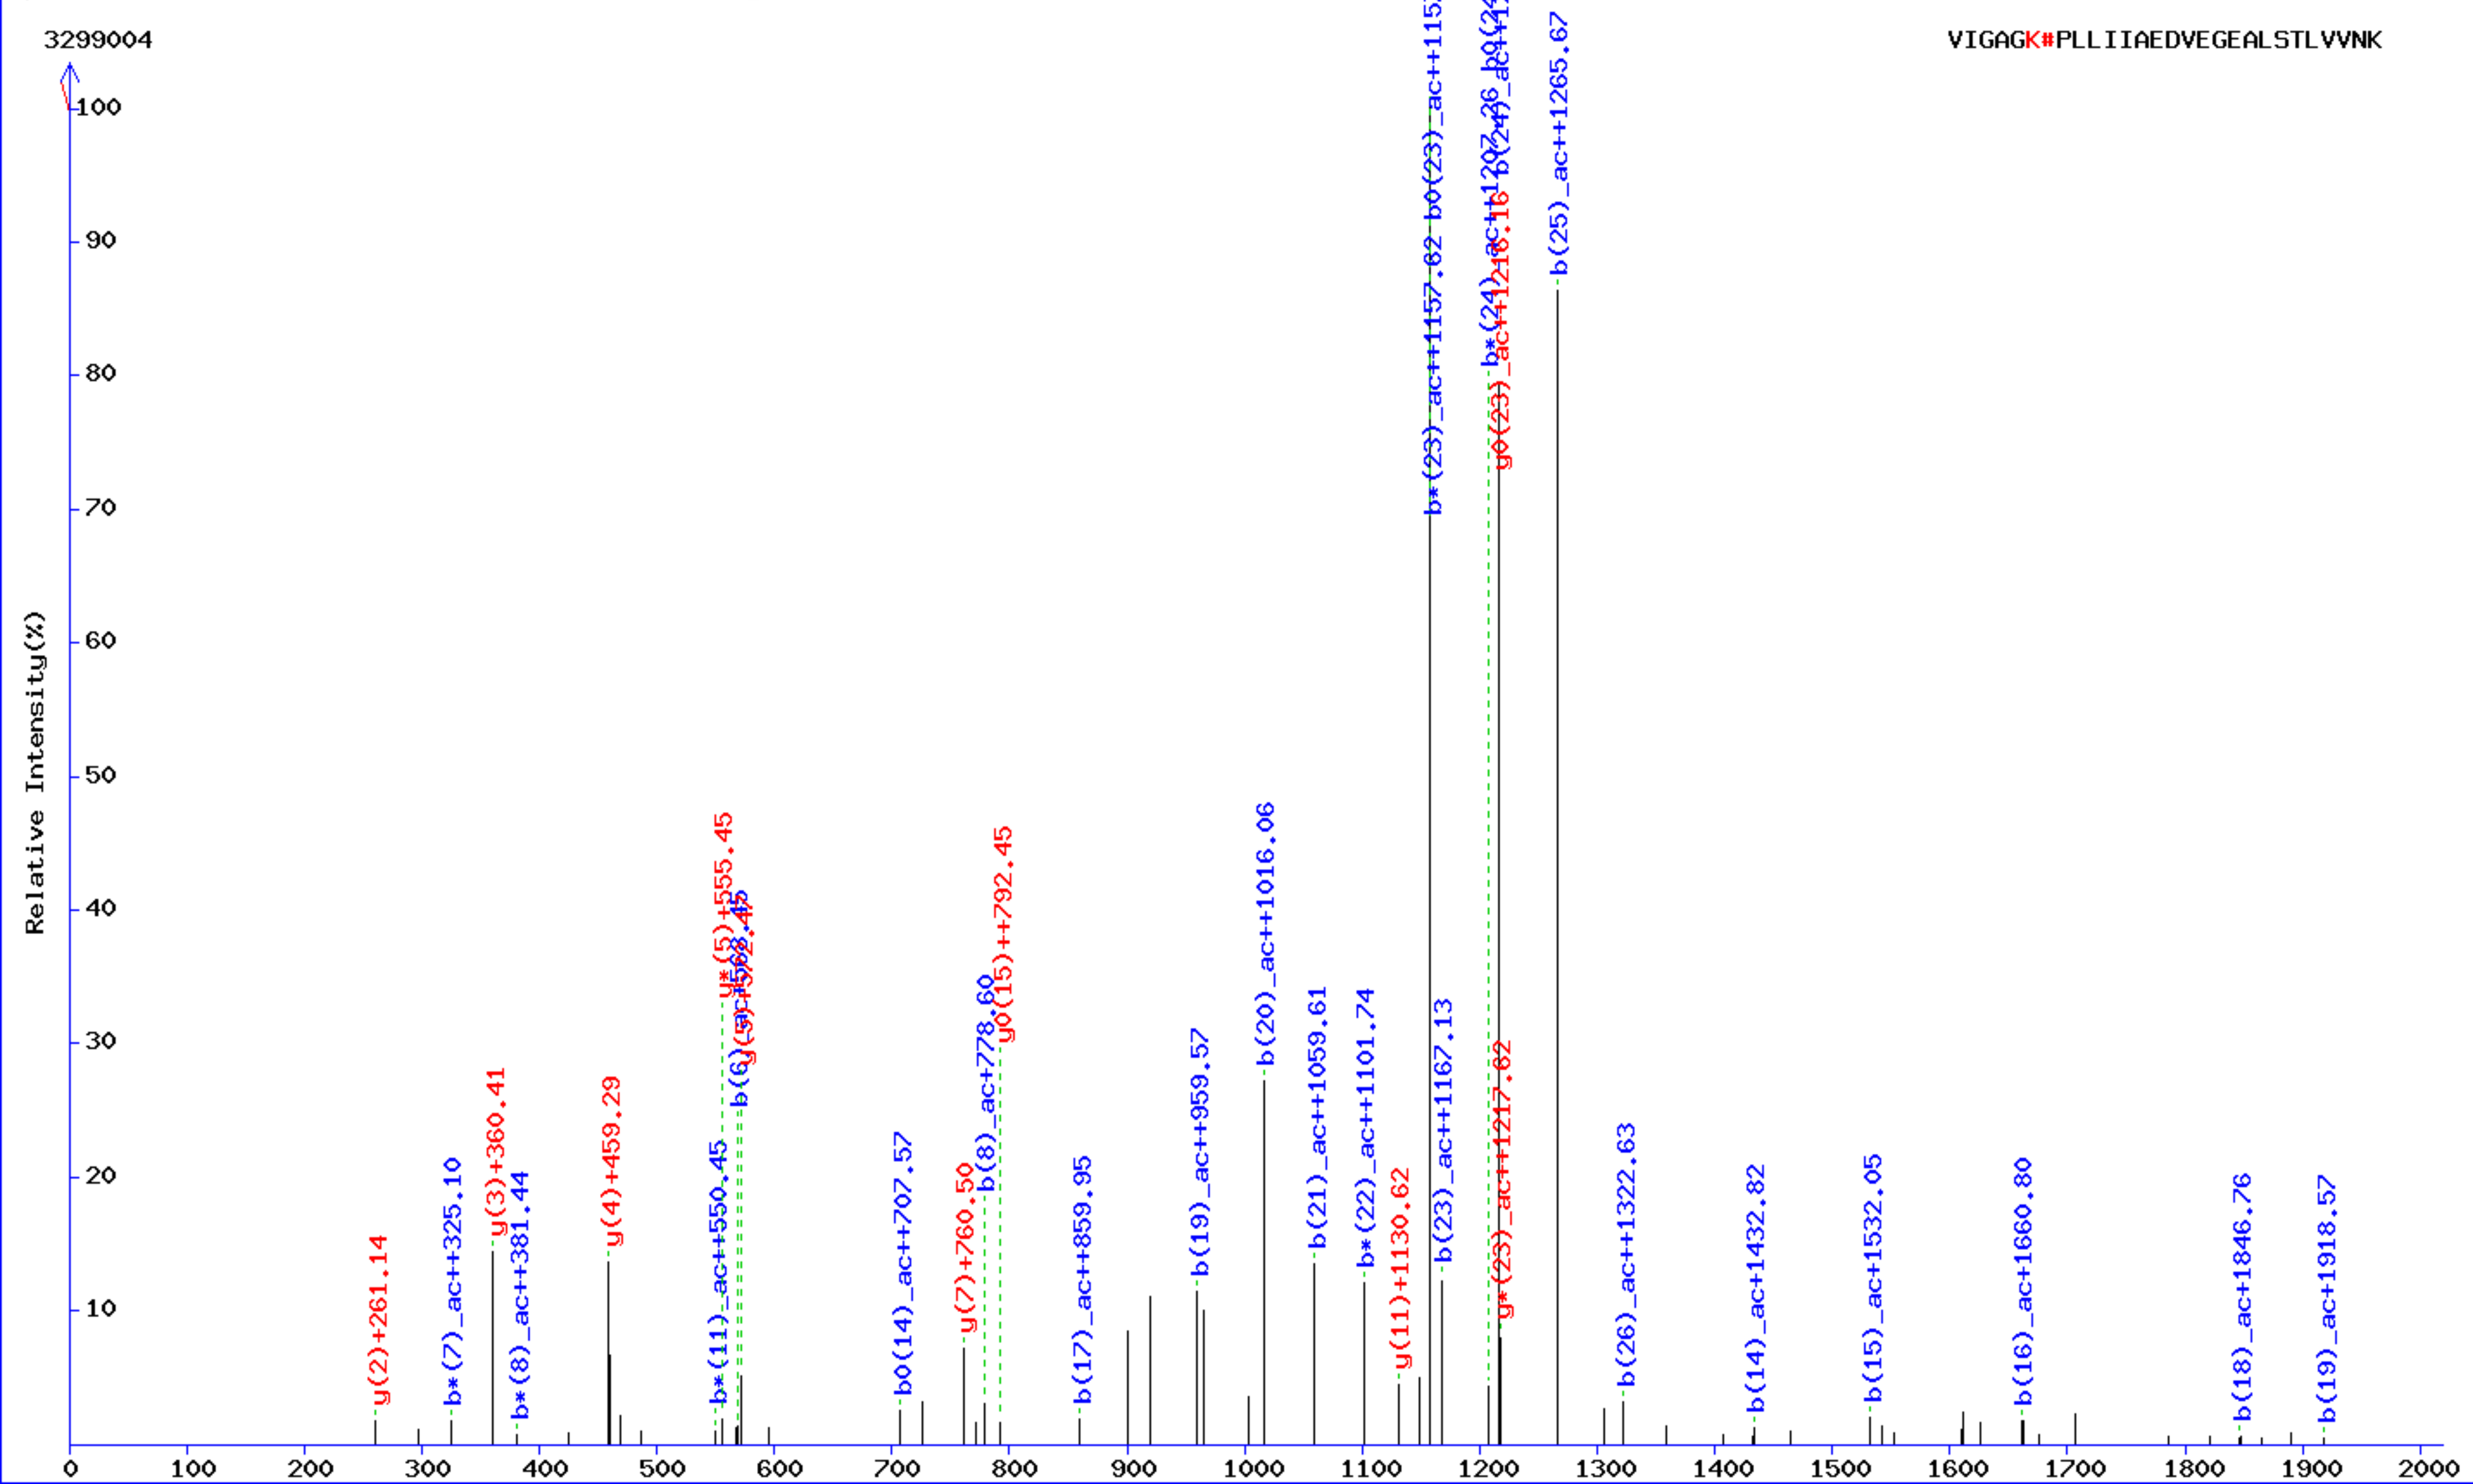

# gi|148660205 MRA\_0445 molecular chaperone GroEL

SALQNAASIAGLFLTTEAVVAD(K#)PE(K#)EK

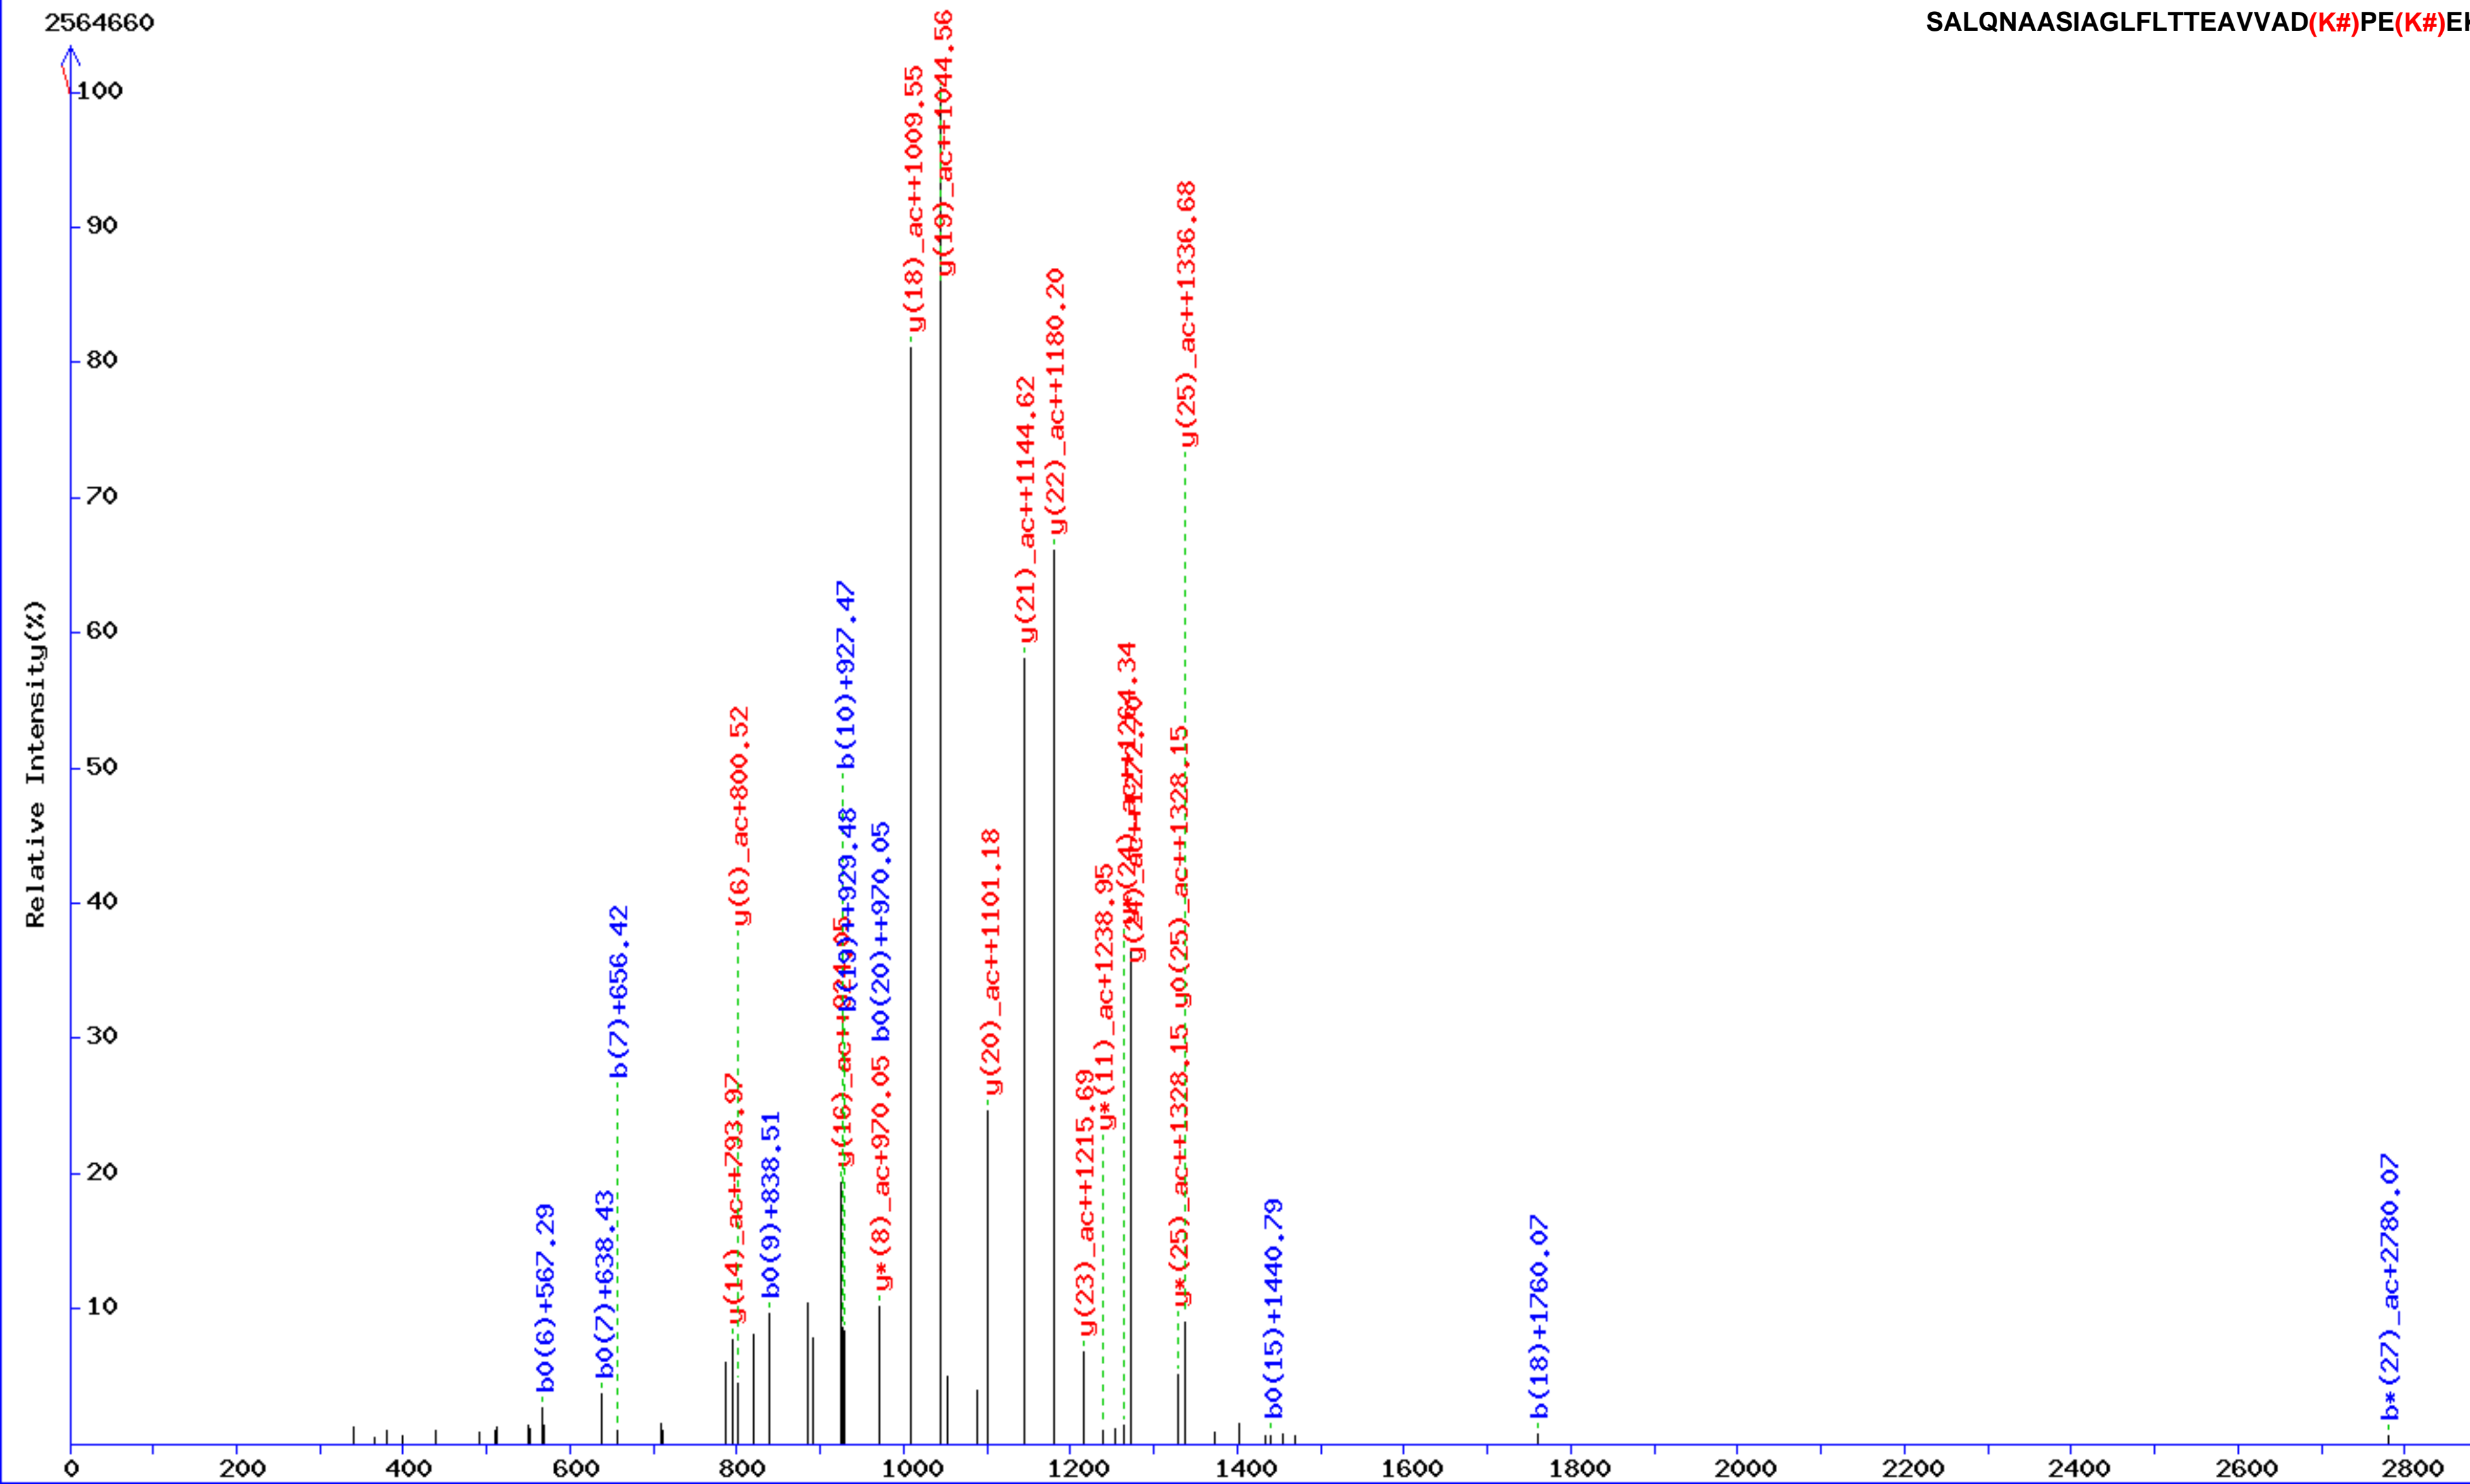



gi|148660205 MRA\_0445 molecular chaperone GroEL

QEAVLEDPYILLVSSK#VSTVK

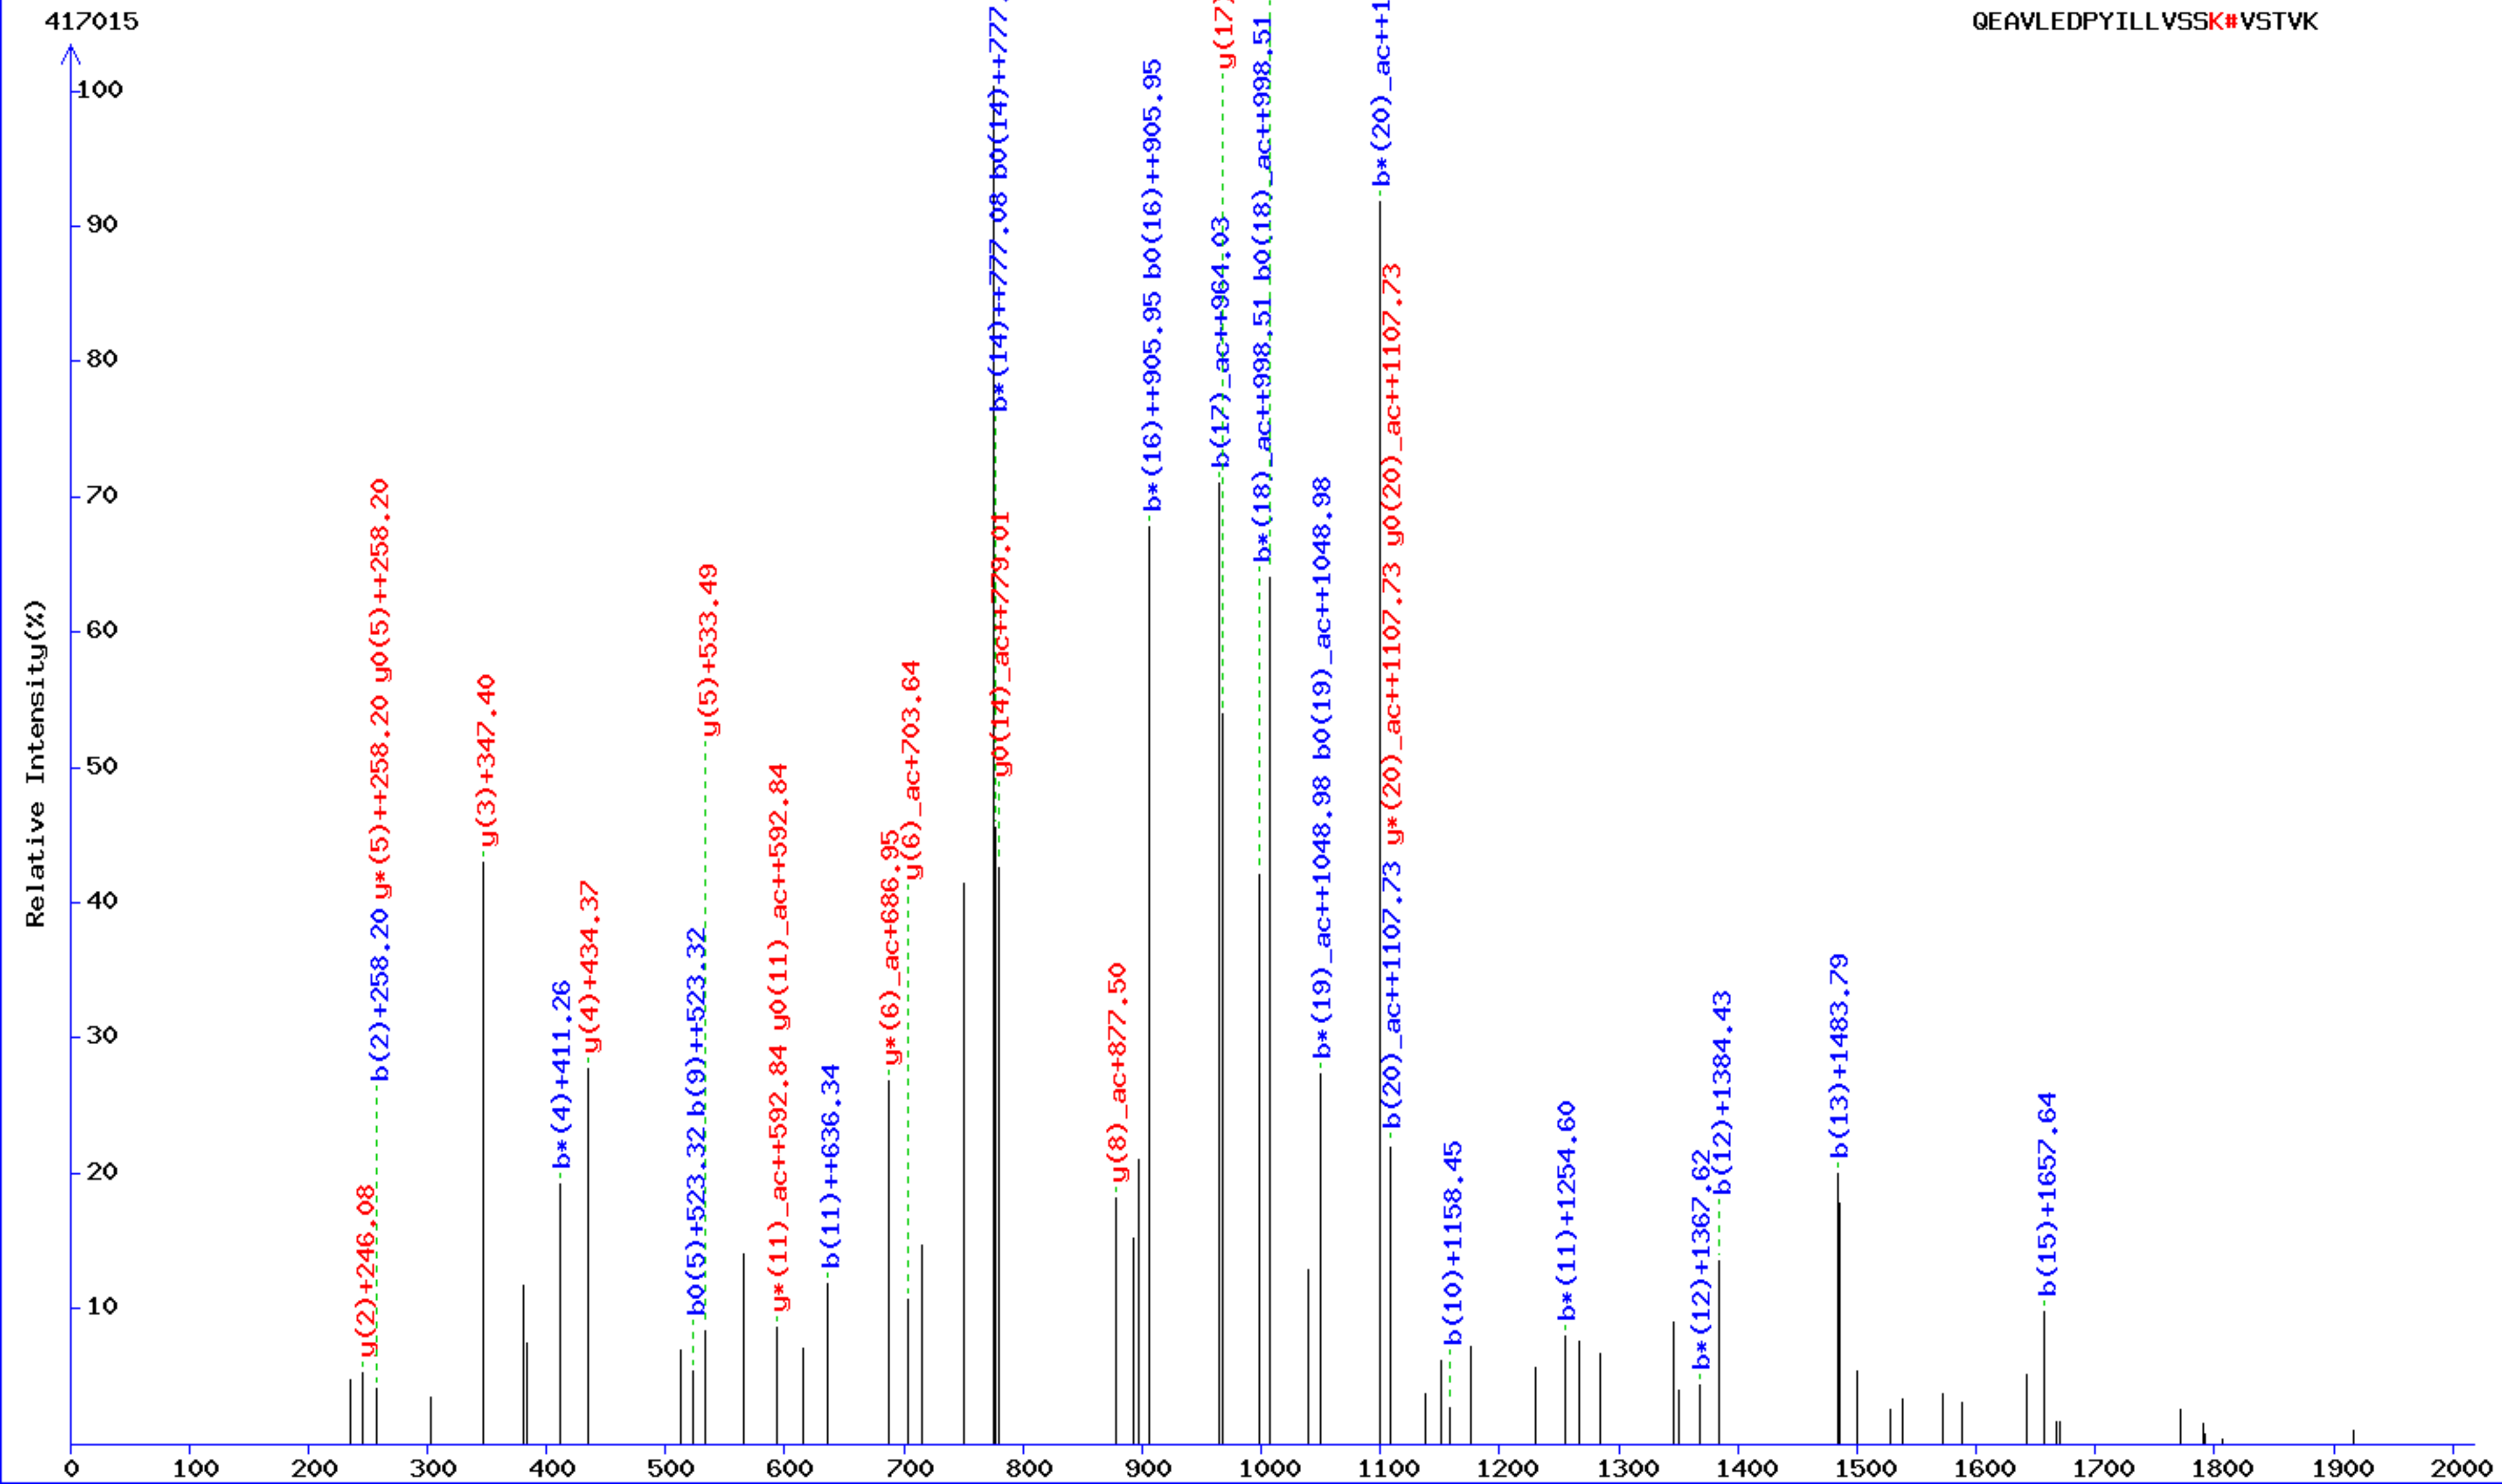

gi|148660661 MRA\_0891 phosphoserine aminotransferase

SQVVGTIDFVDDVDAGTVAK#ILR

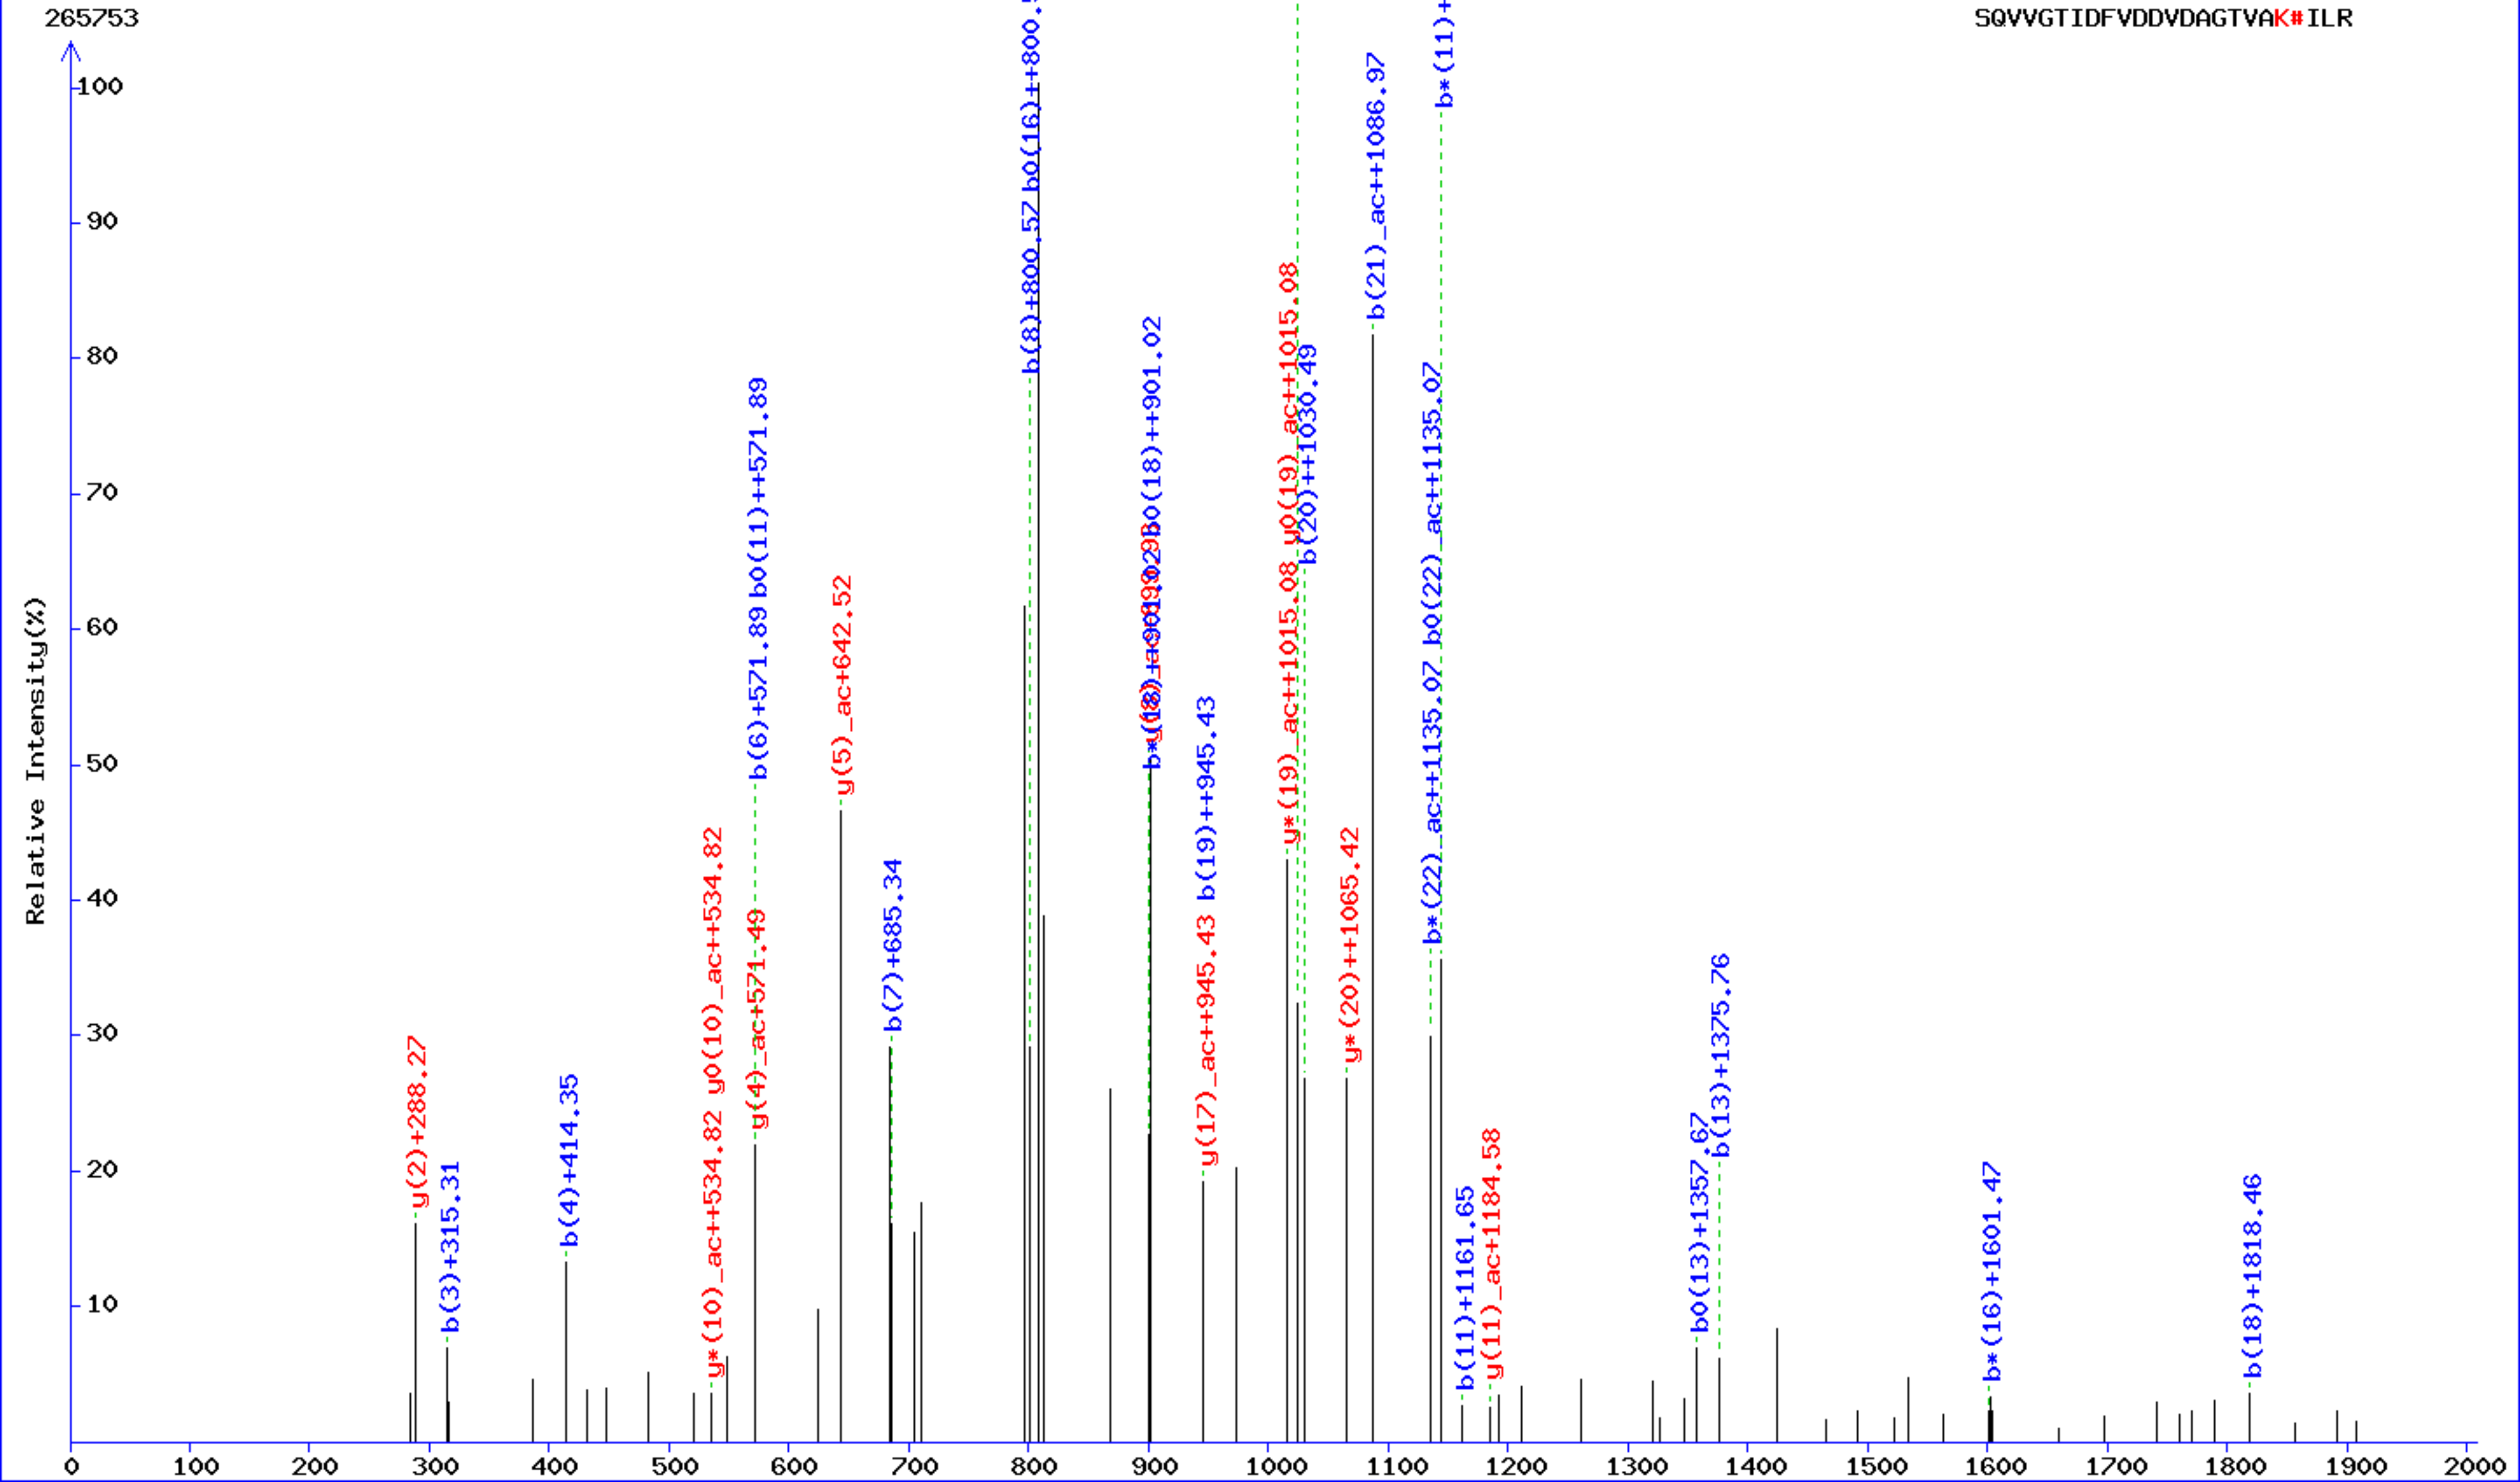

# gi|148663558 MRA\_3730 hypothetical protein

SVGK#IVM#GLRVVSDDGPER

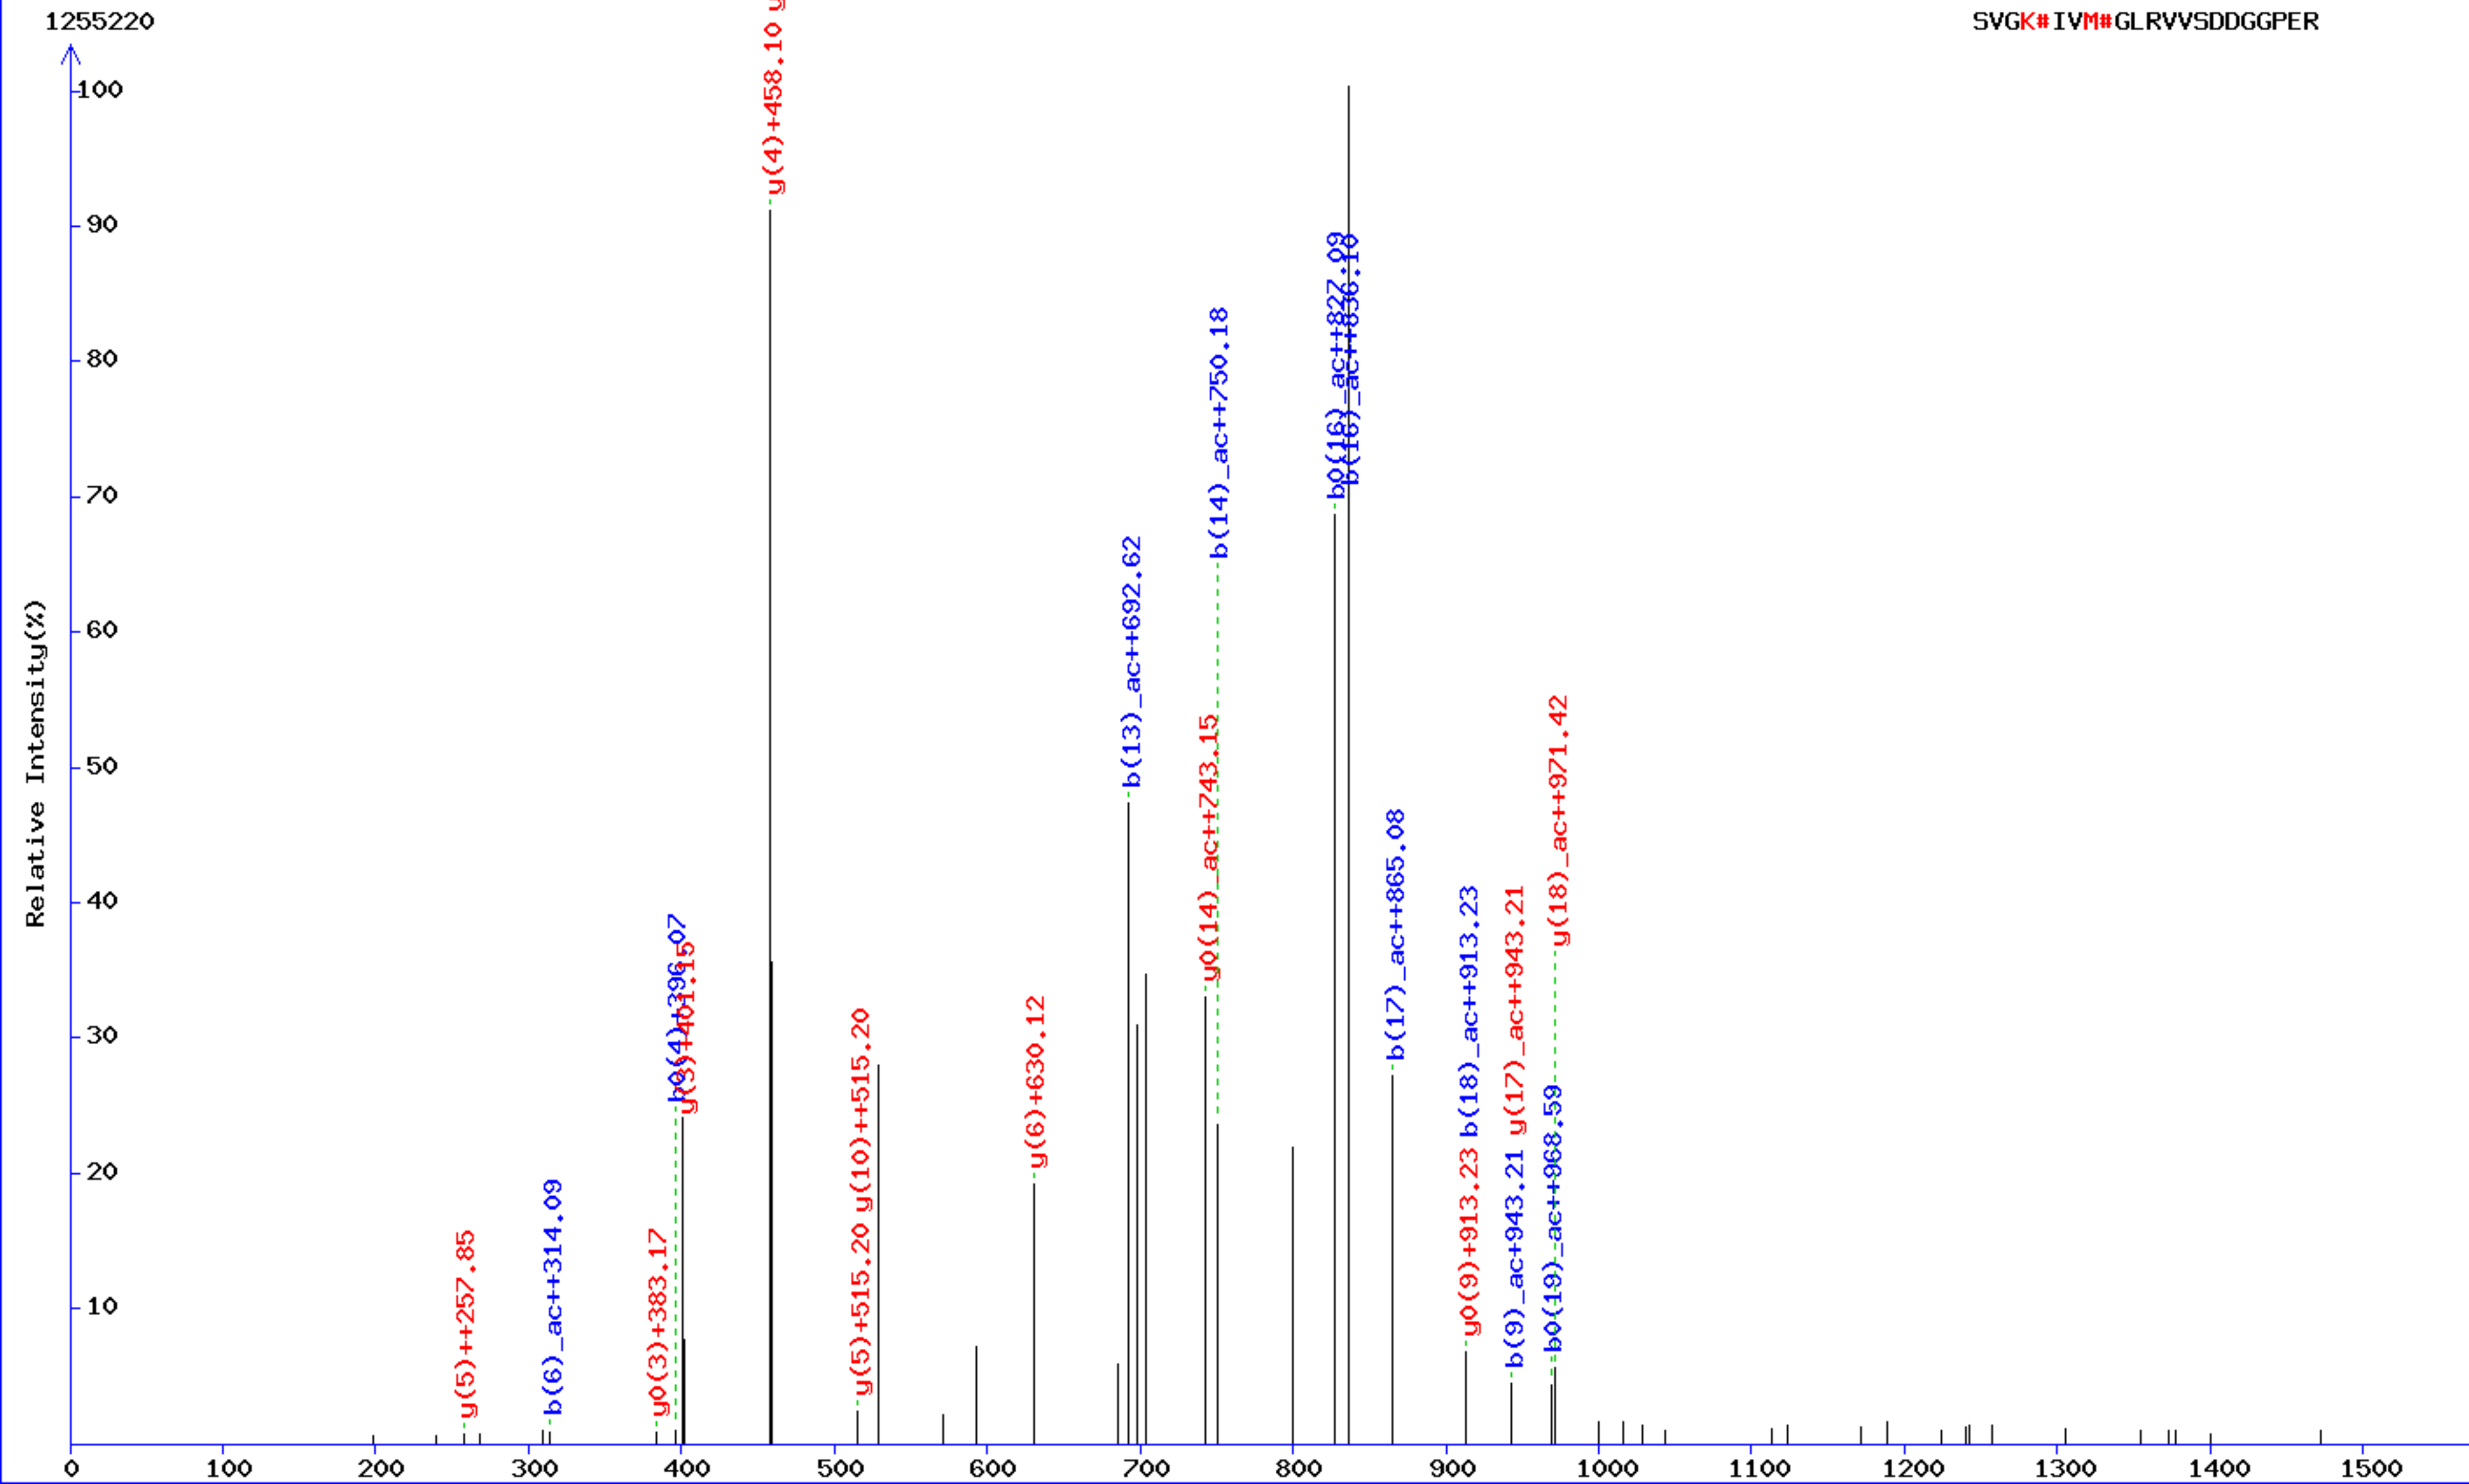

# gi|148661422 MRA\_1637 lipid-transfer protein

M#DLYGATVEDFAQVK#VK#

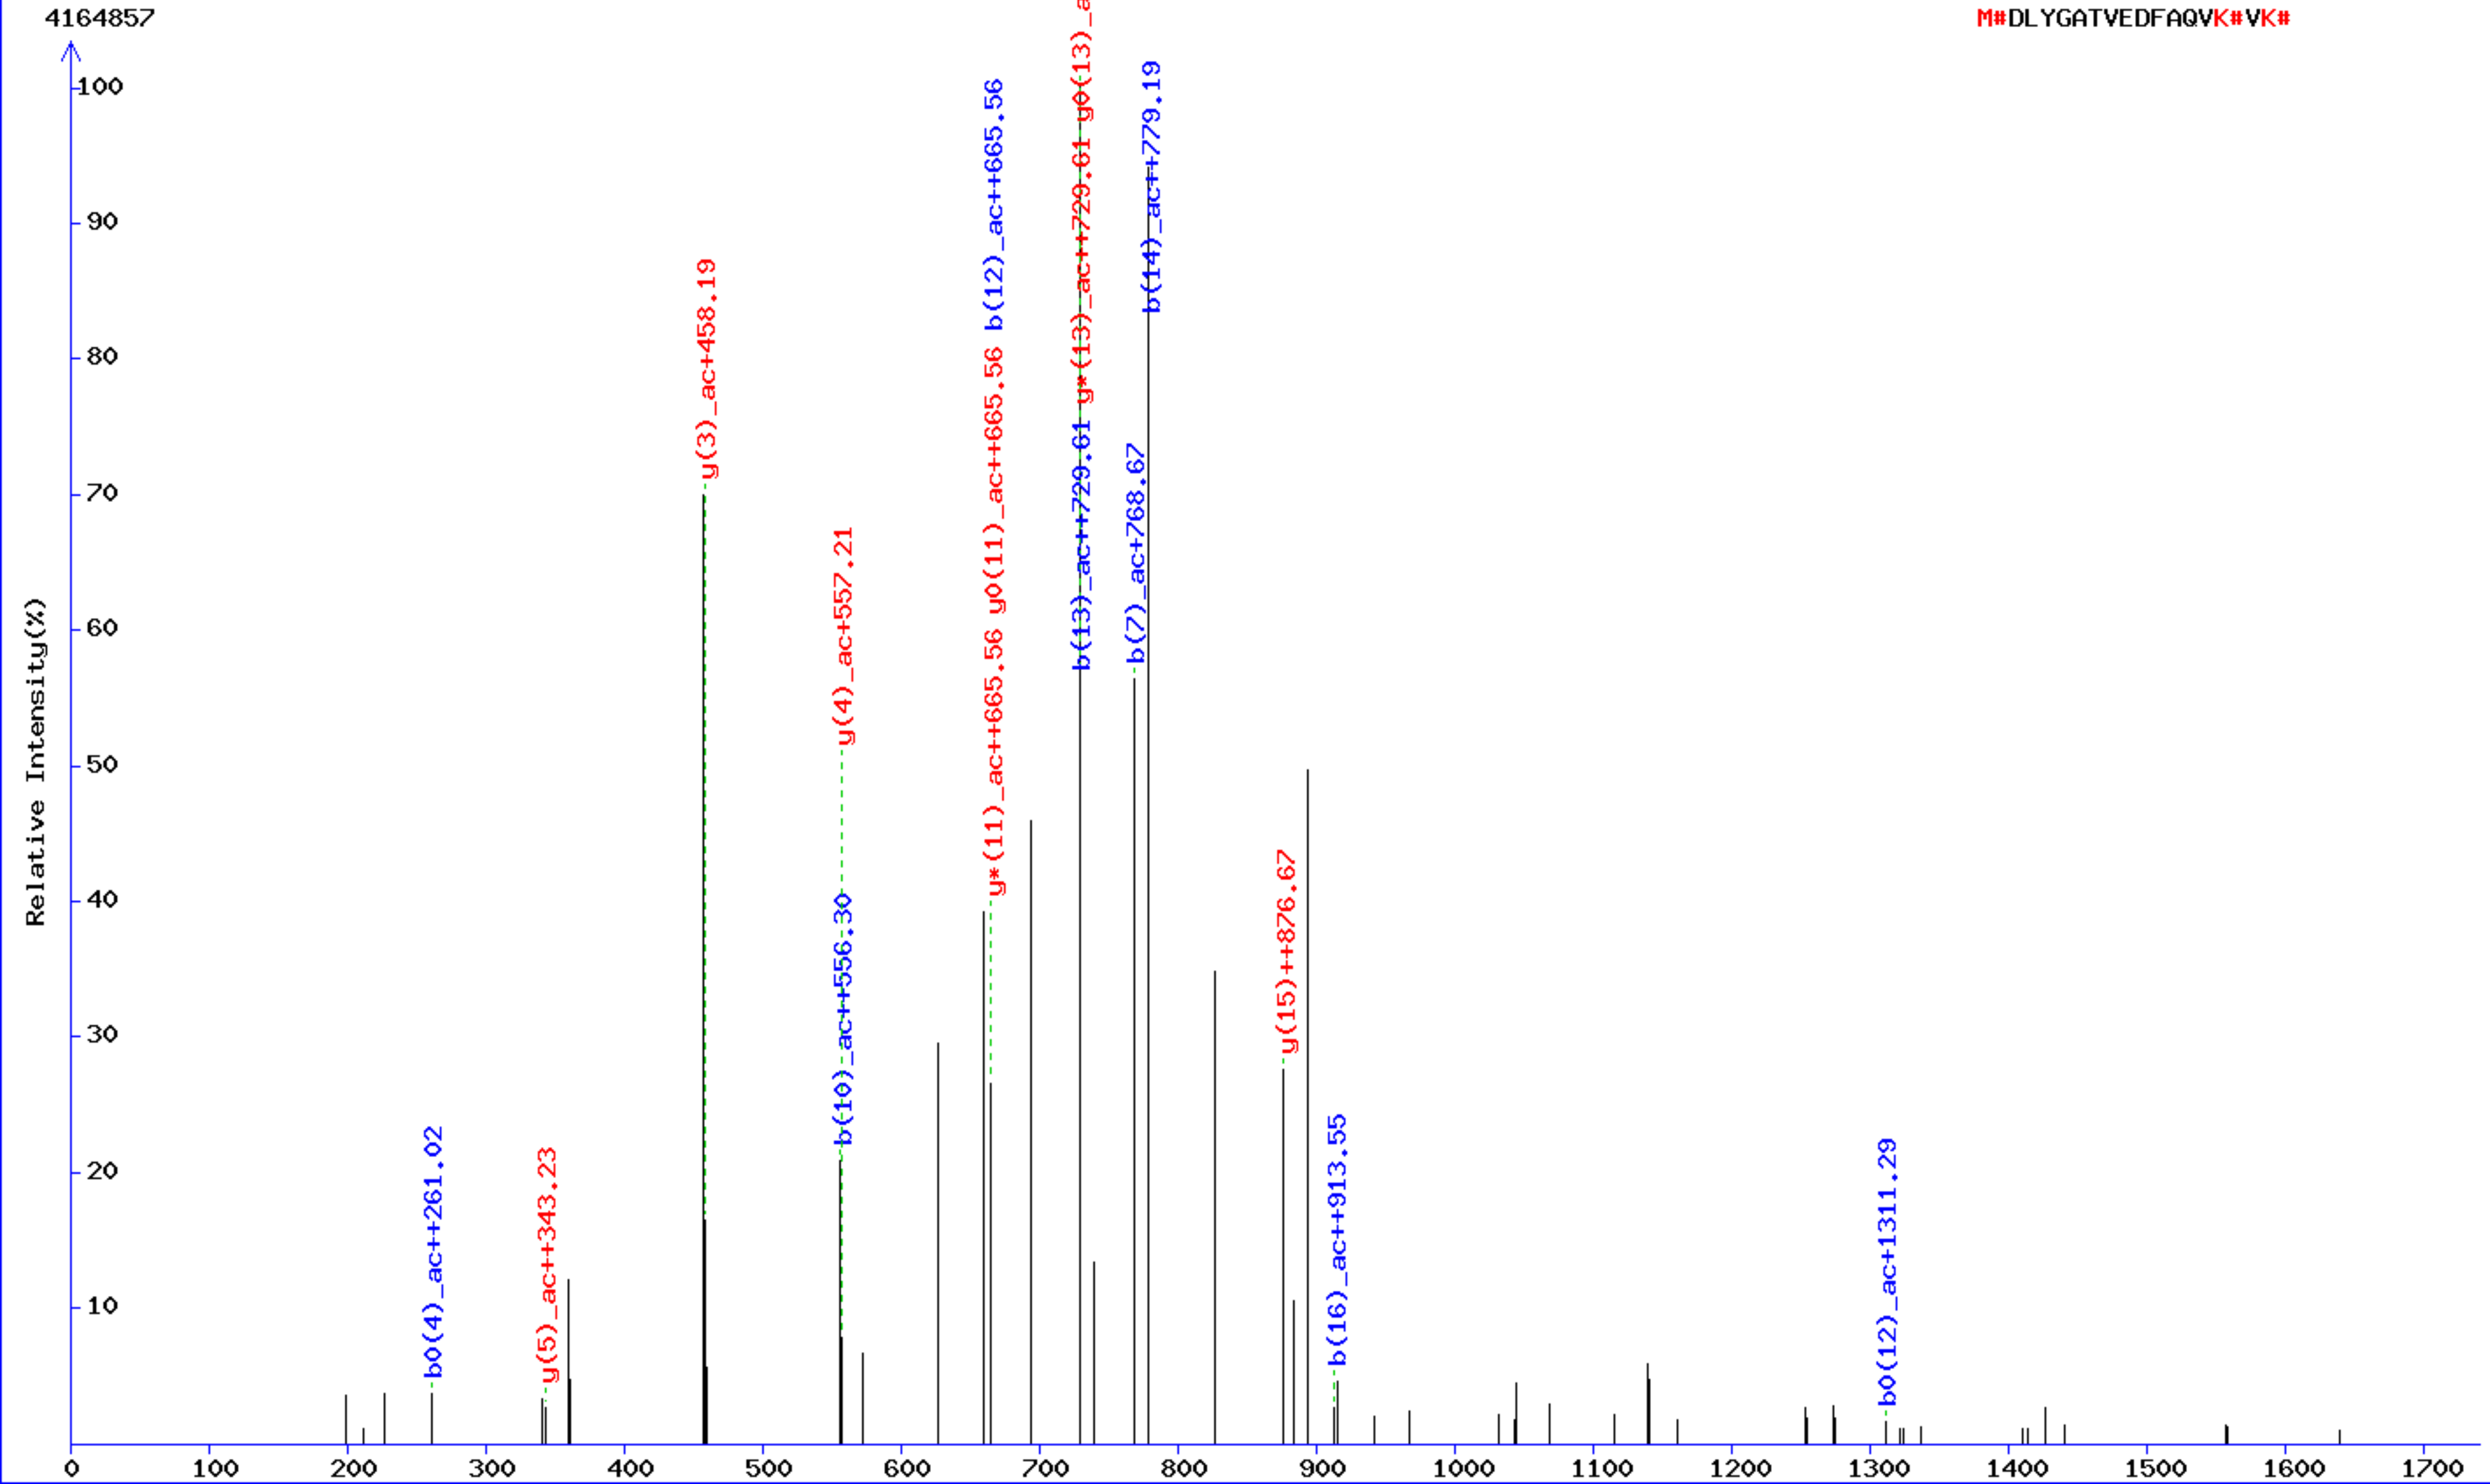

# gi|148660205 MRA\_0445 molecular chaperone GroEL

NVAAGANPLGLK#R

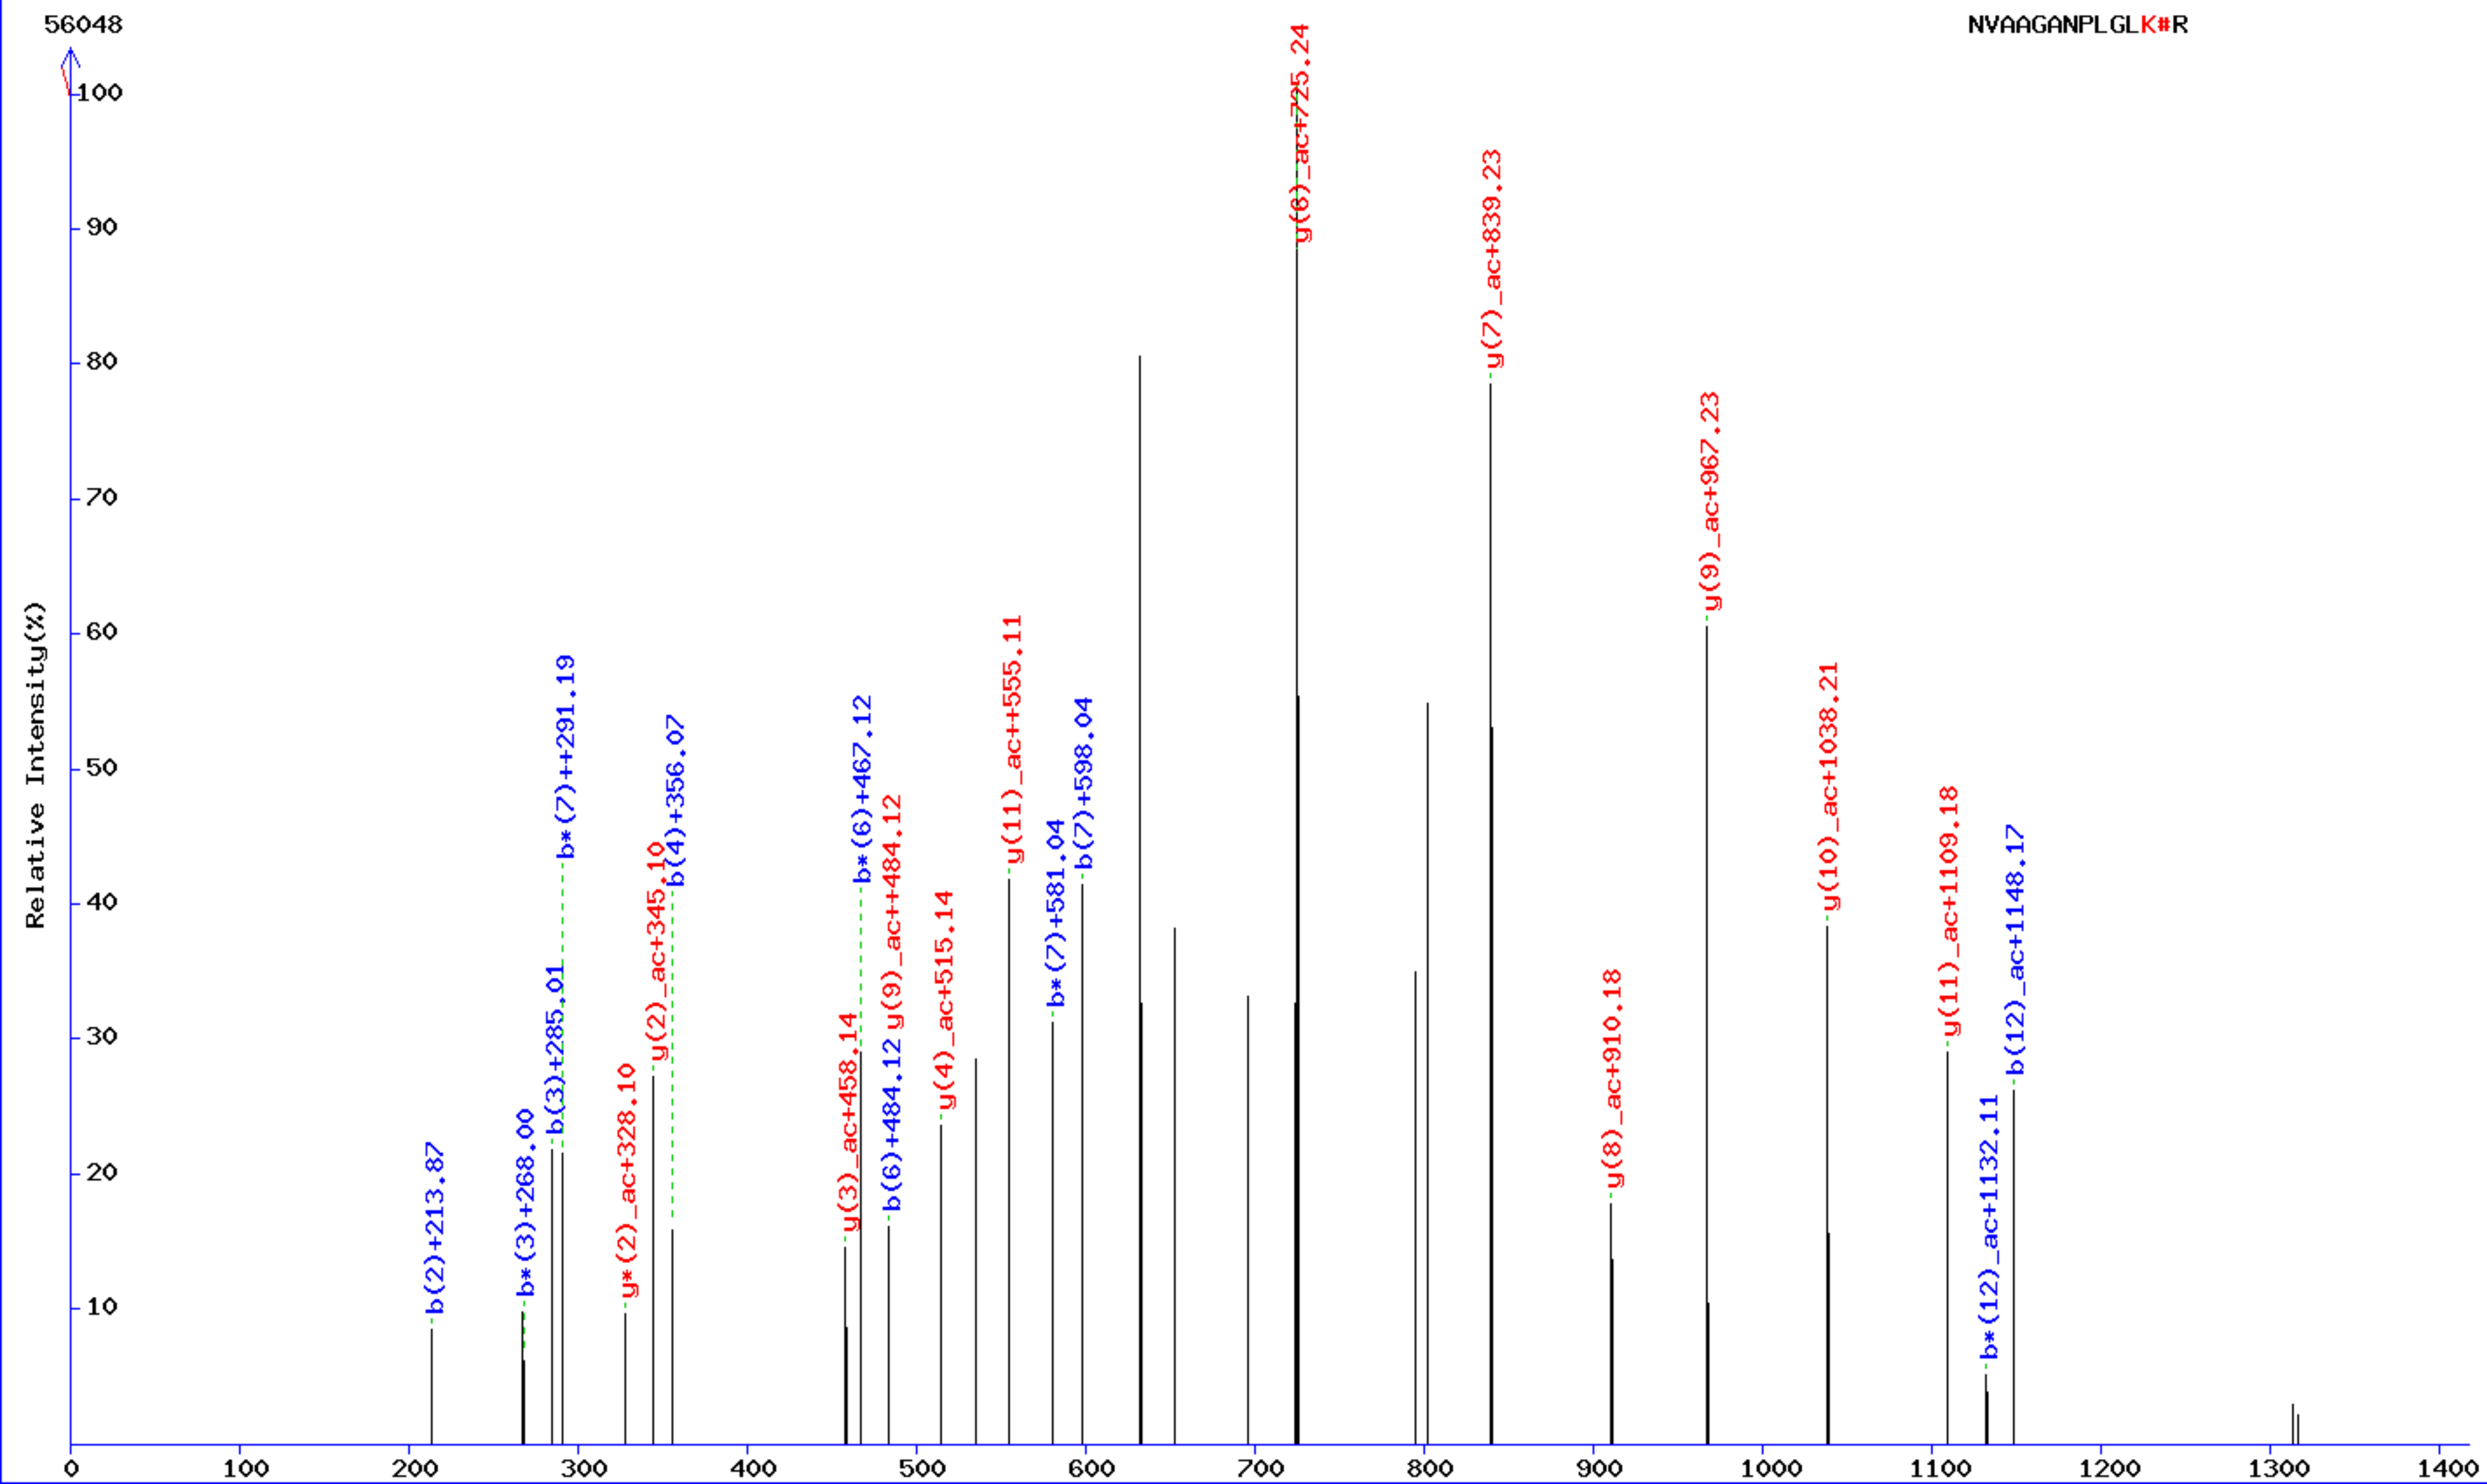

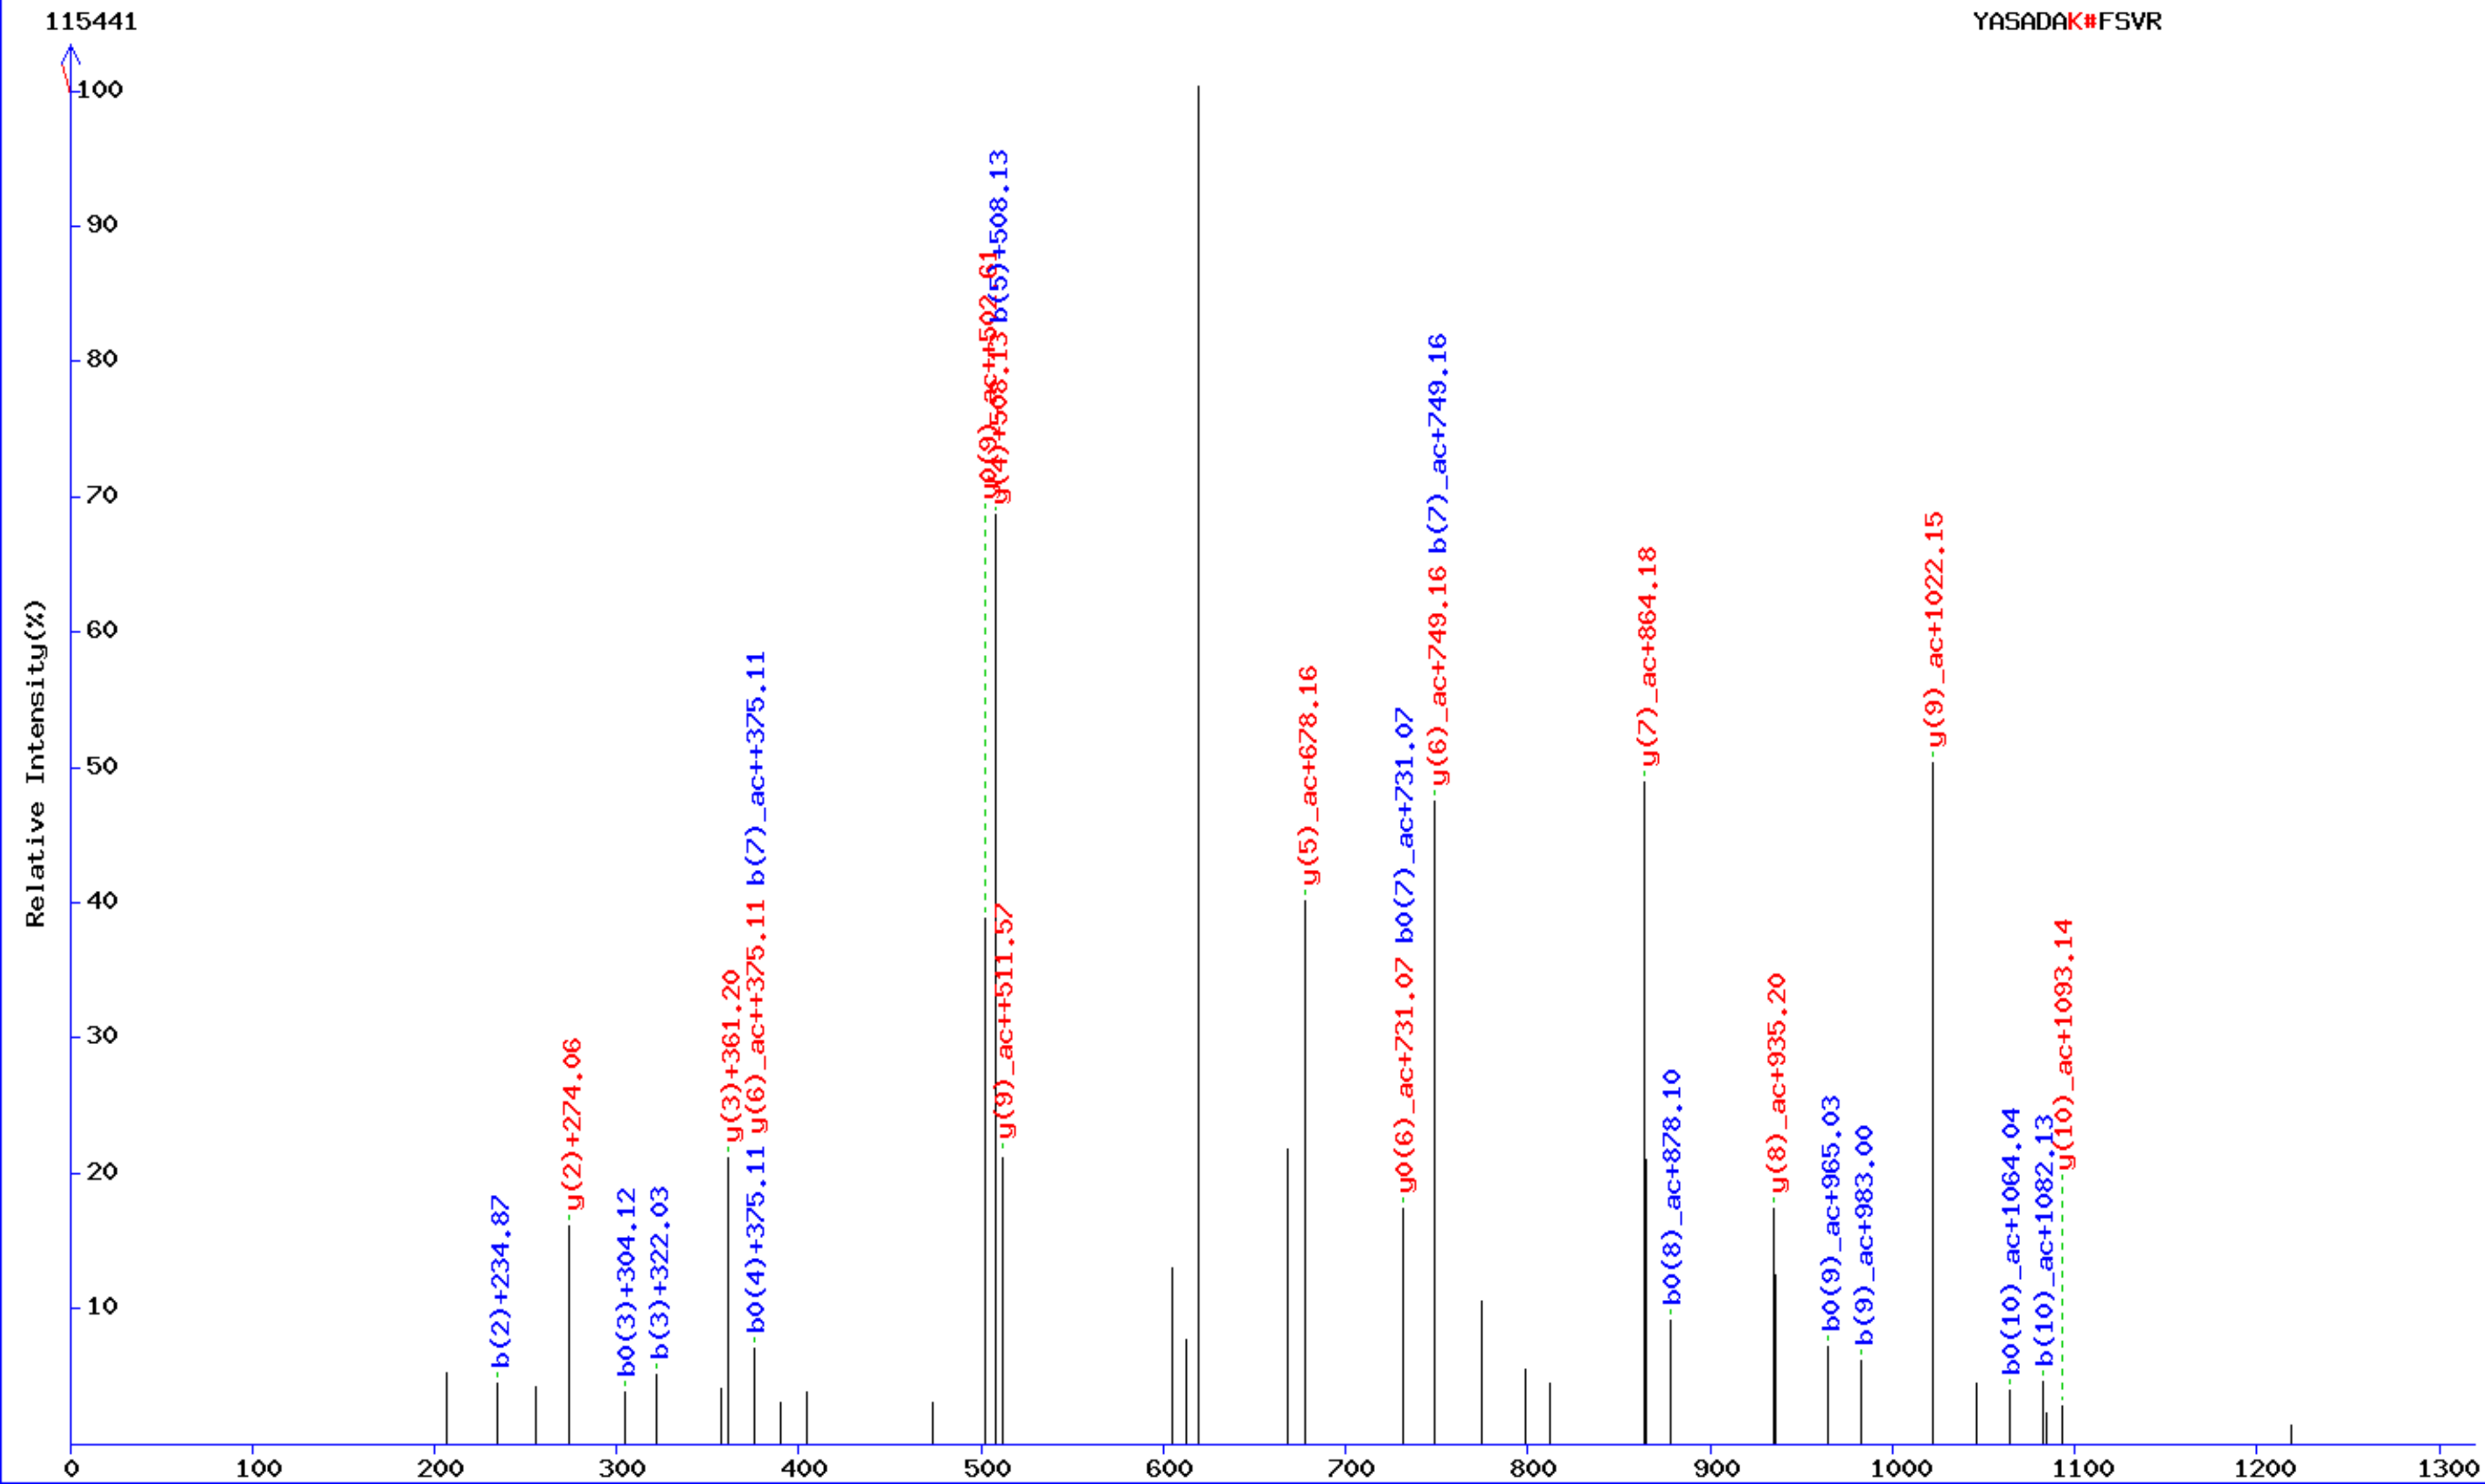

# gi|148660674 MRA\_0904 type II citrate synthase

EAGVK#LMGFGHR

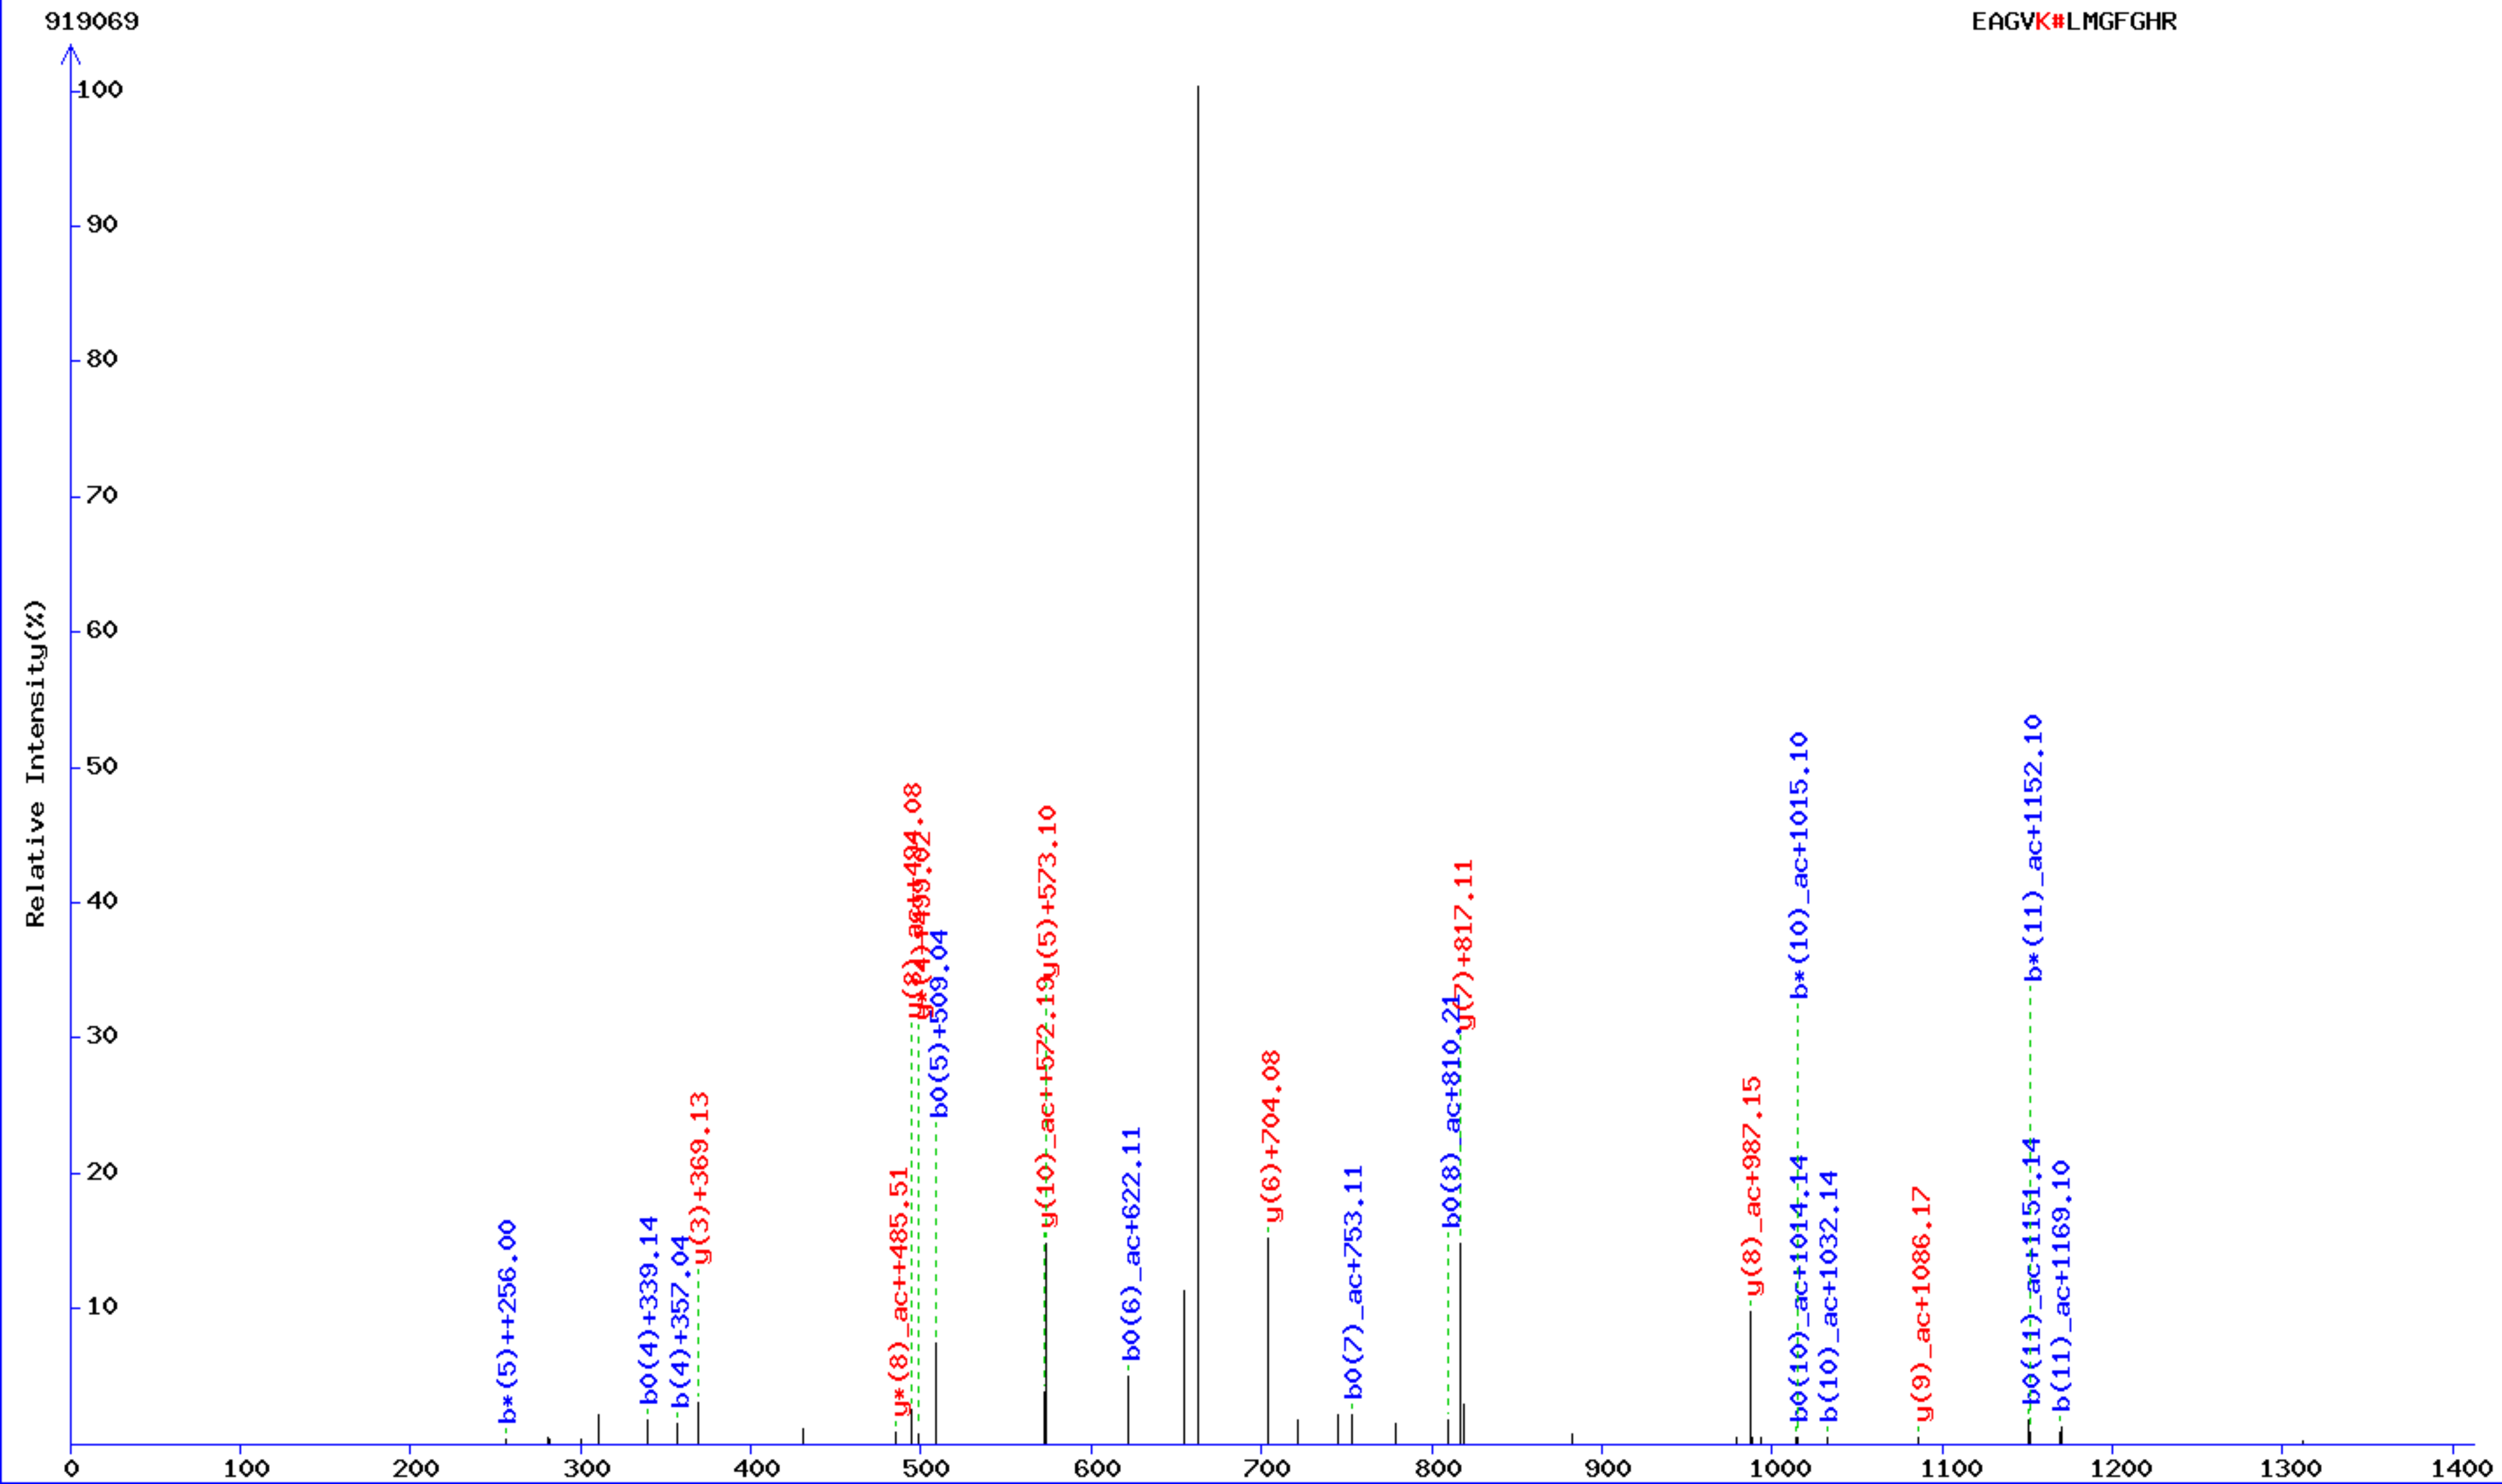

# gi|148660460 MRA\_0694 elongation factor Tu

GQVVTKPGTTTPHTEFEGQVYILSK#DEGGR

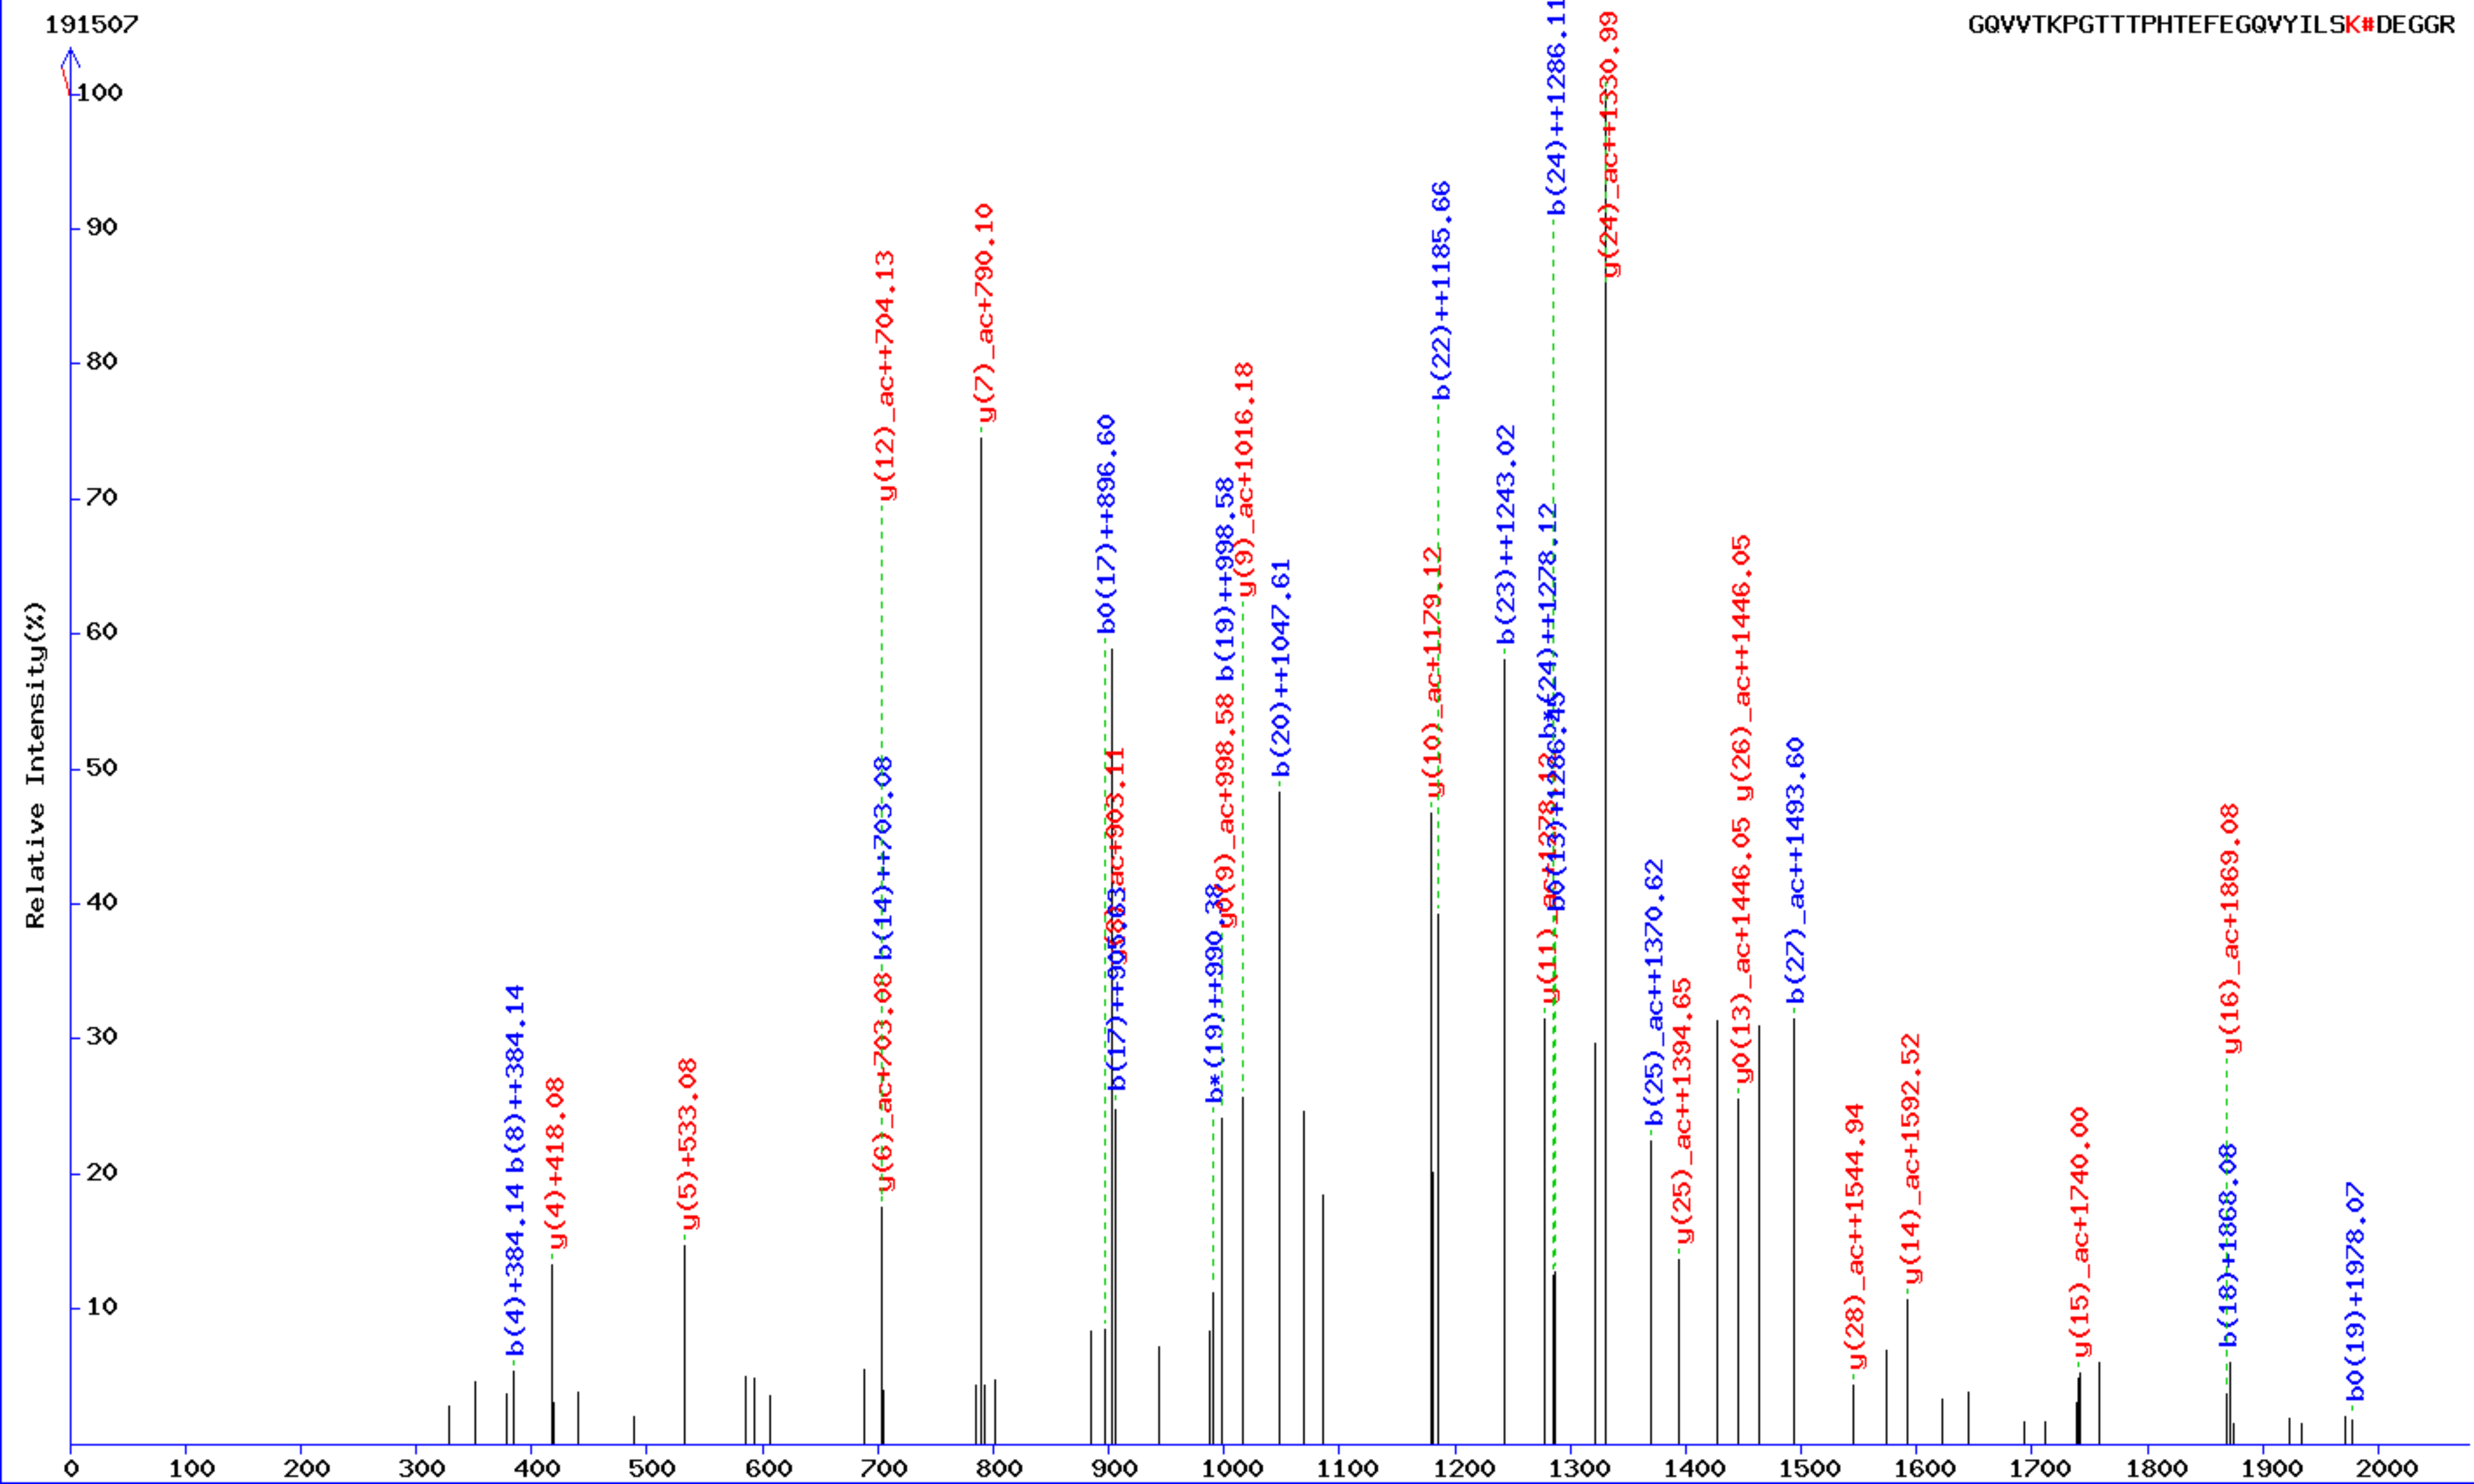



# gi|148662881 MRA\_3060 electron transfer flavoprotein subunit beta

FPSFK#GIMAAK

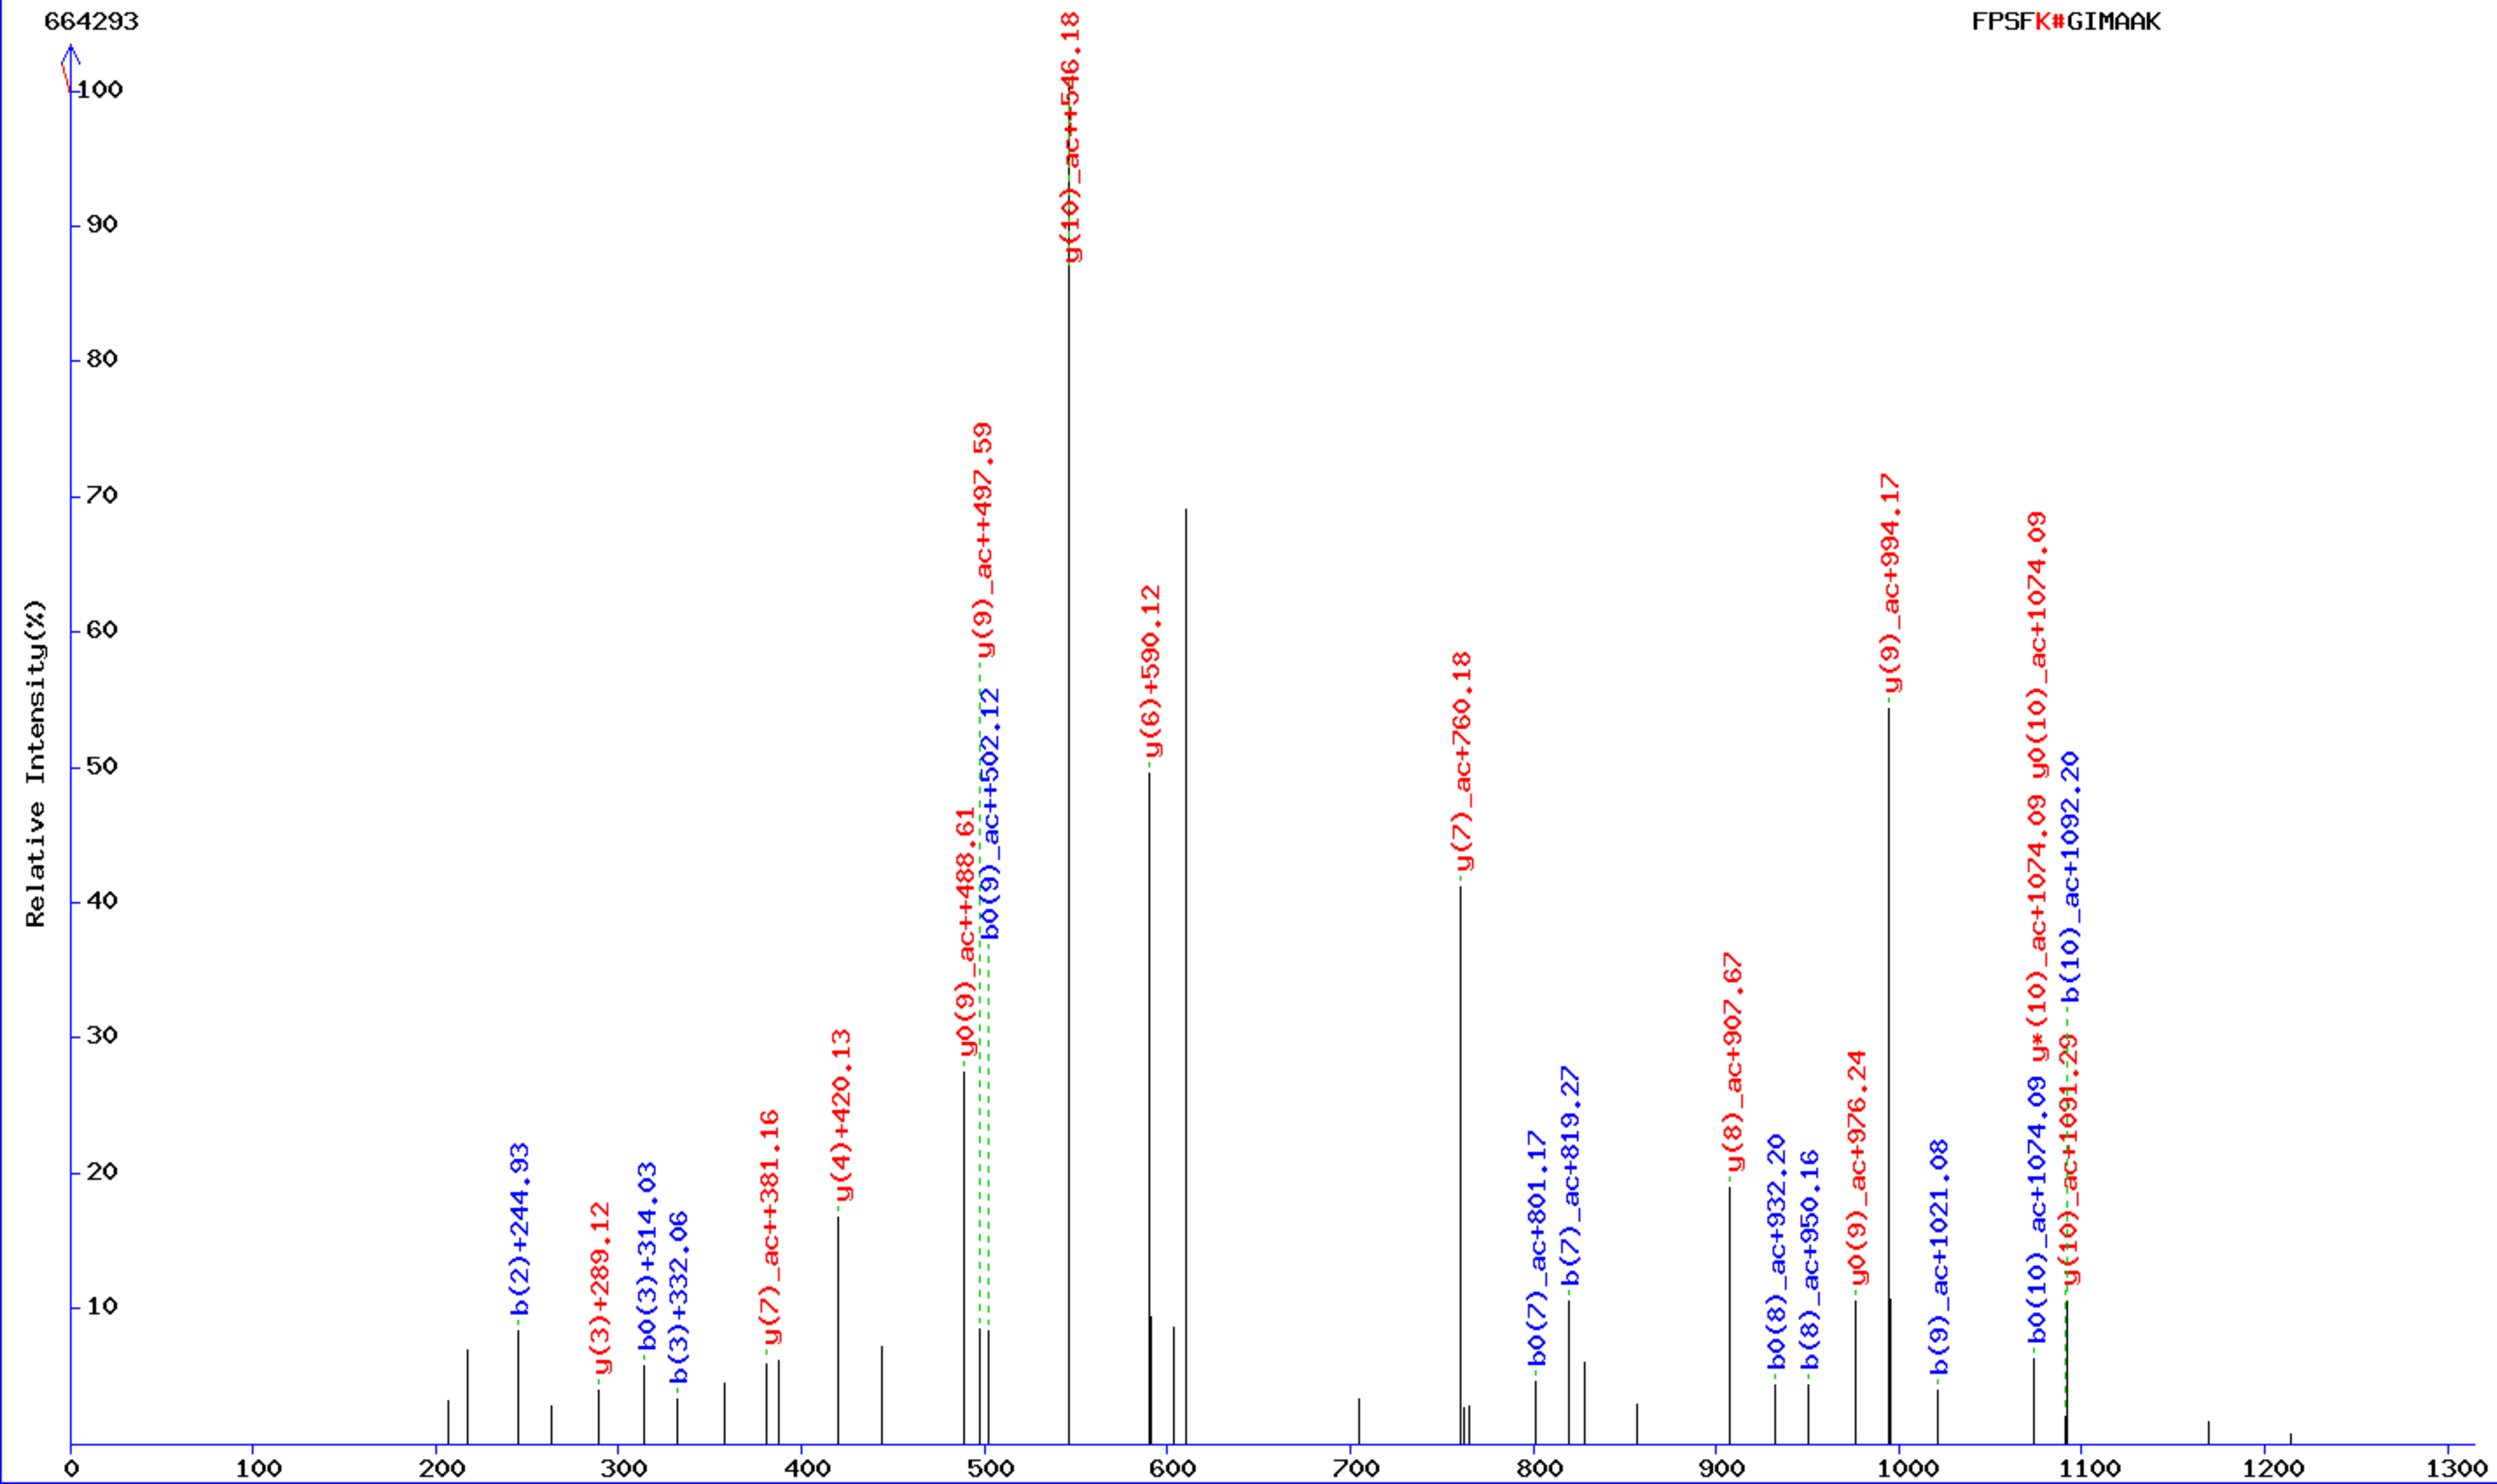

# gi|148662586 MRA\_2770 hypothetical protein

LLSQLEQAK#MQEQVSASLR

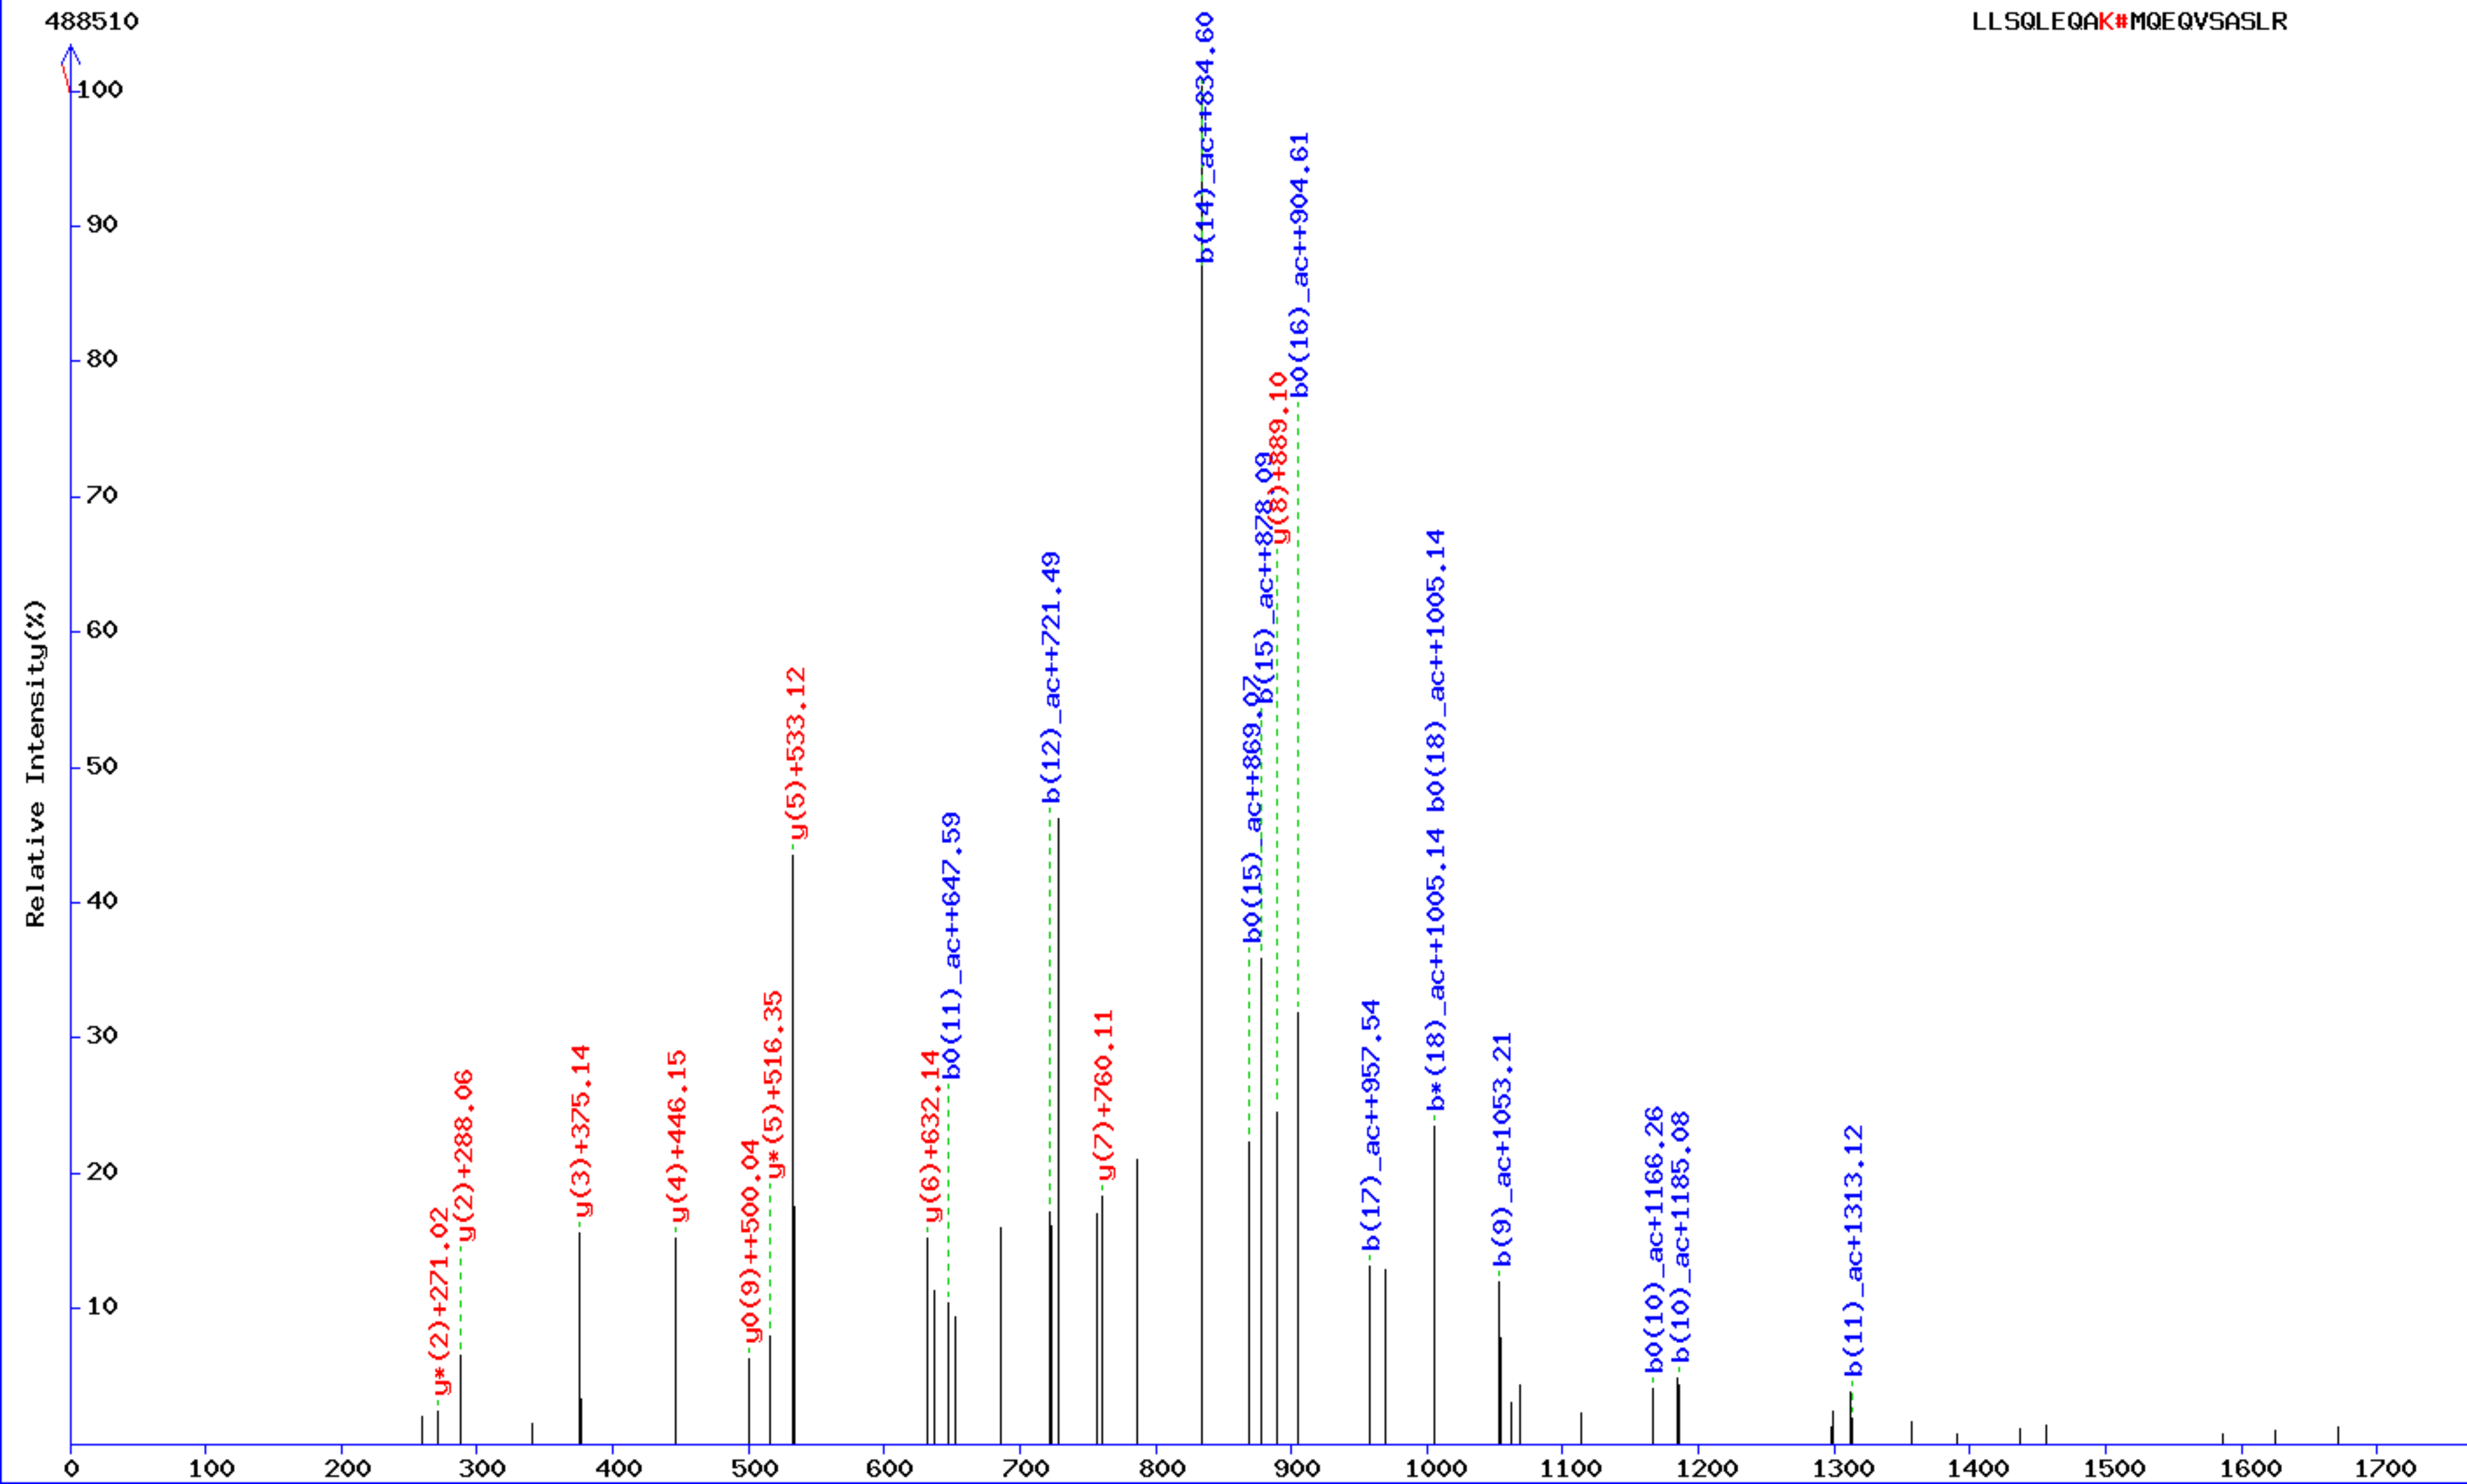

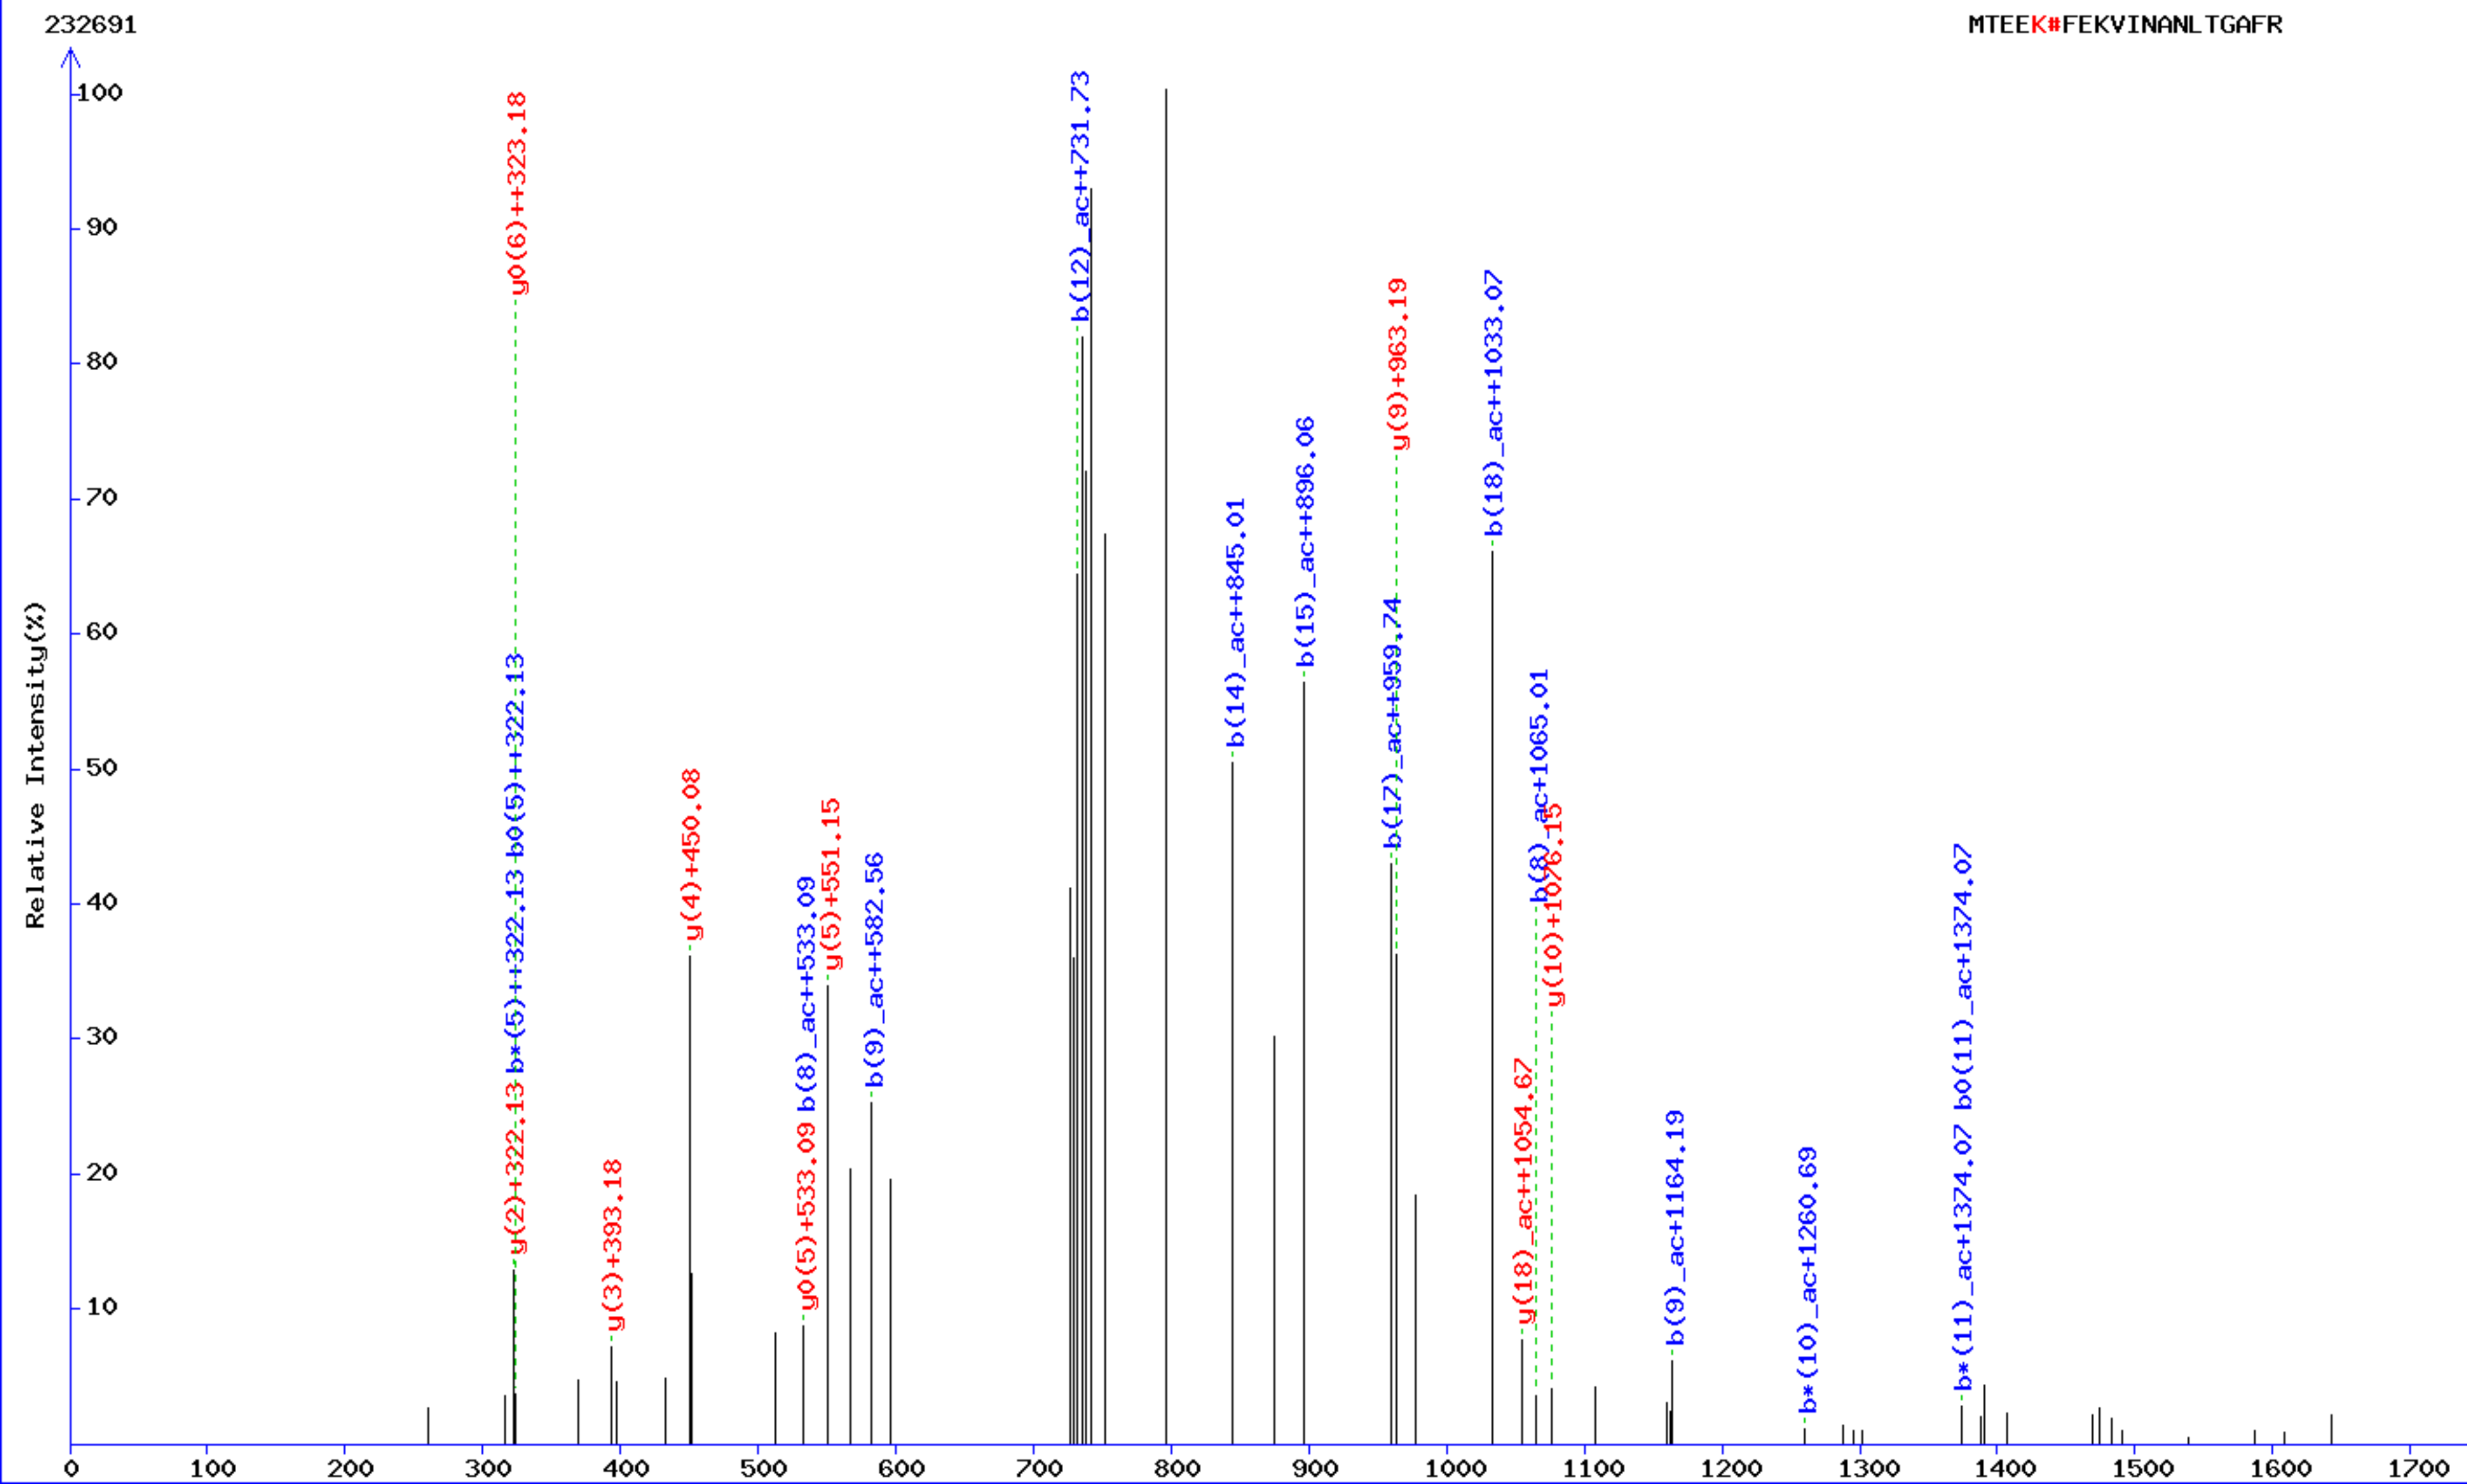

# gi|148660460 MRA\_0694 elongation factor Tu

TTLTAAITK#VLHDKFPDLNETK

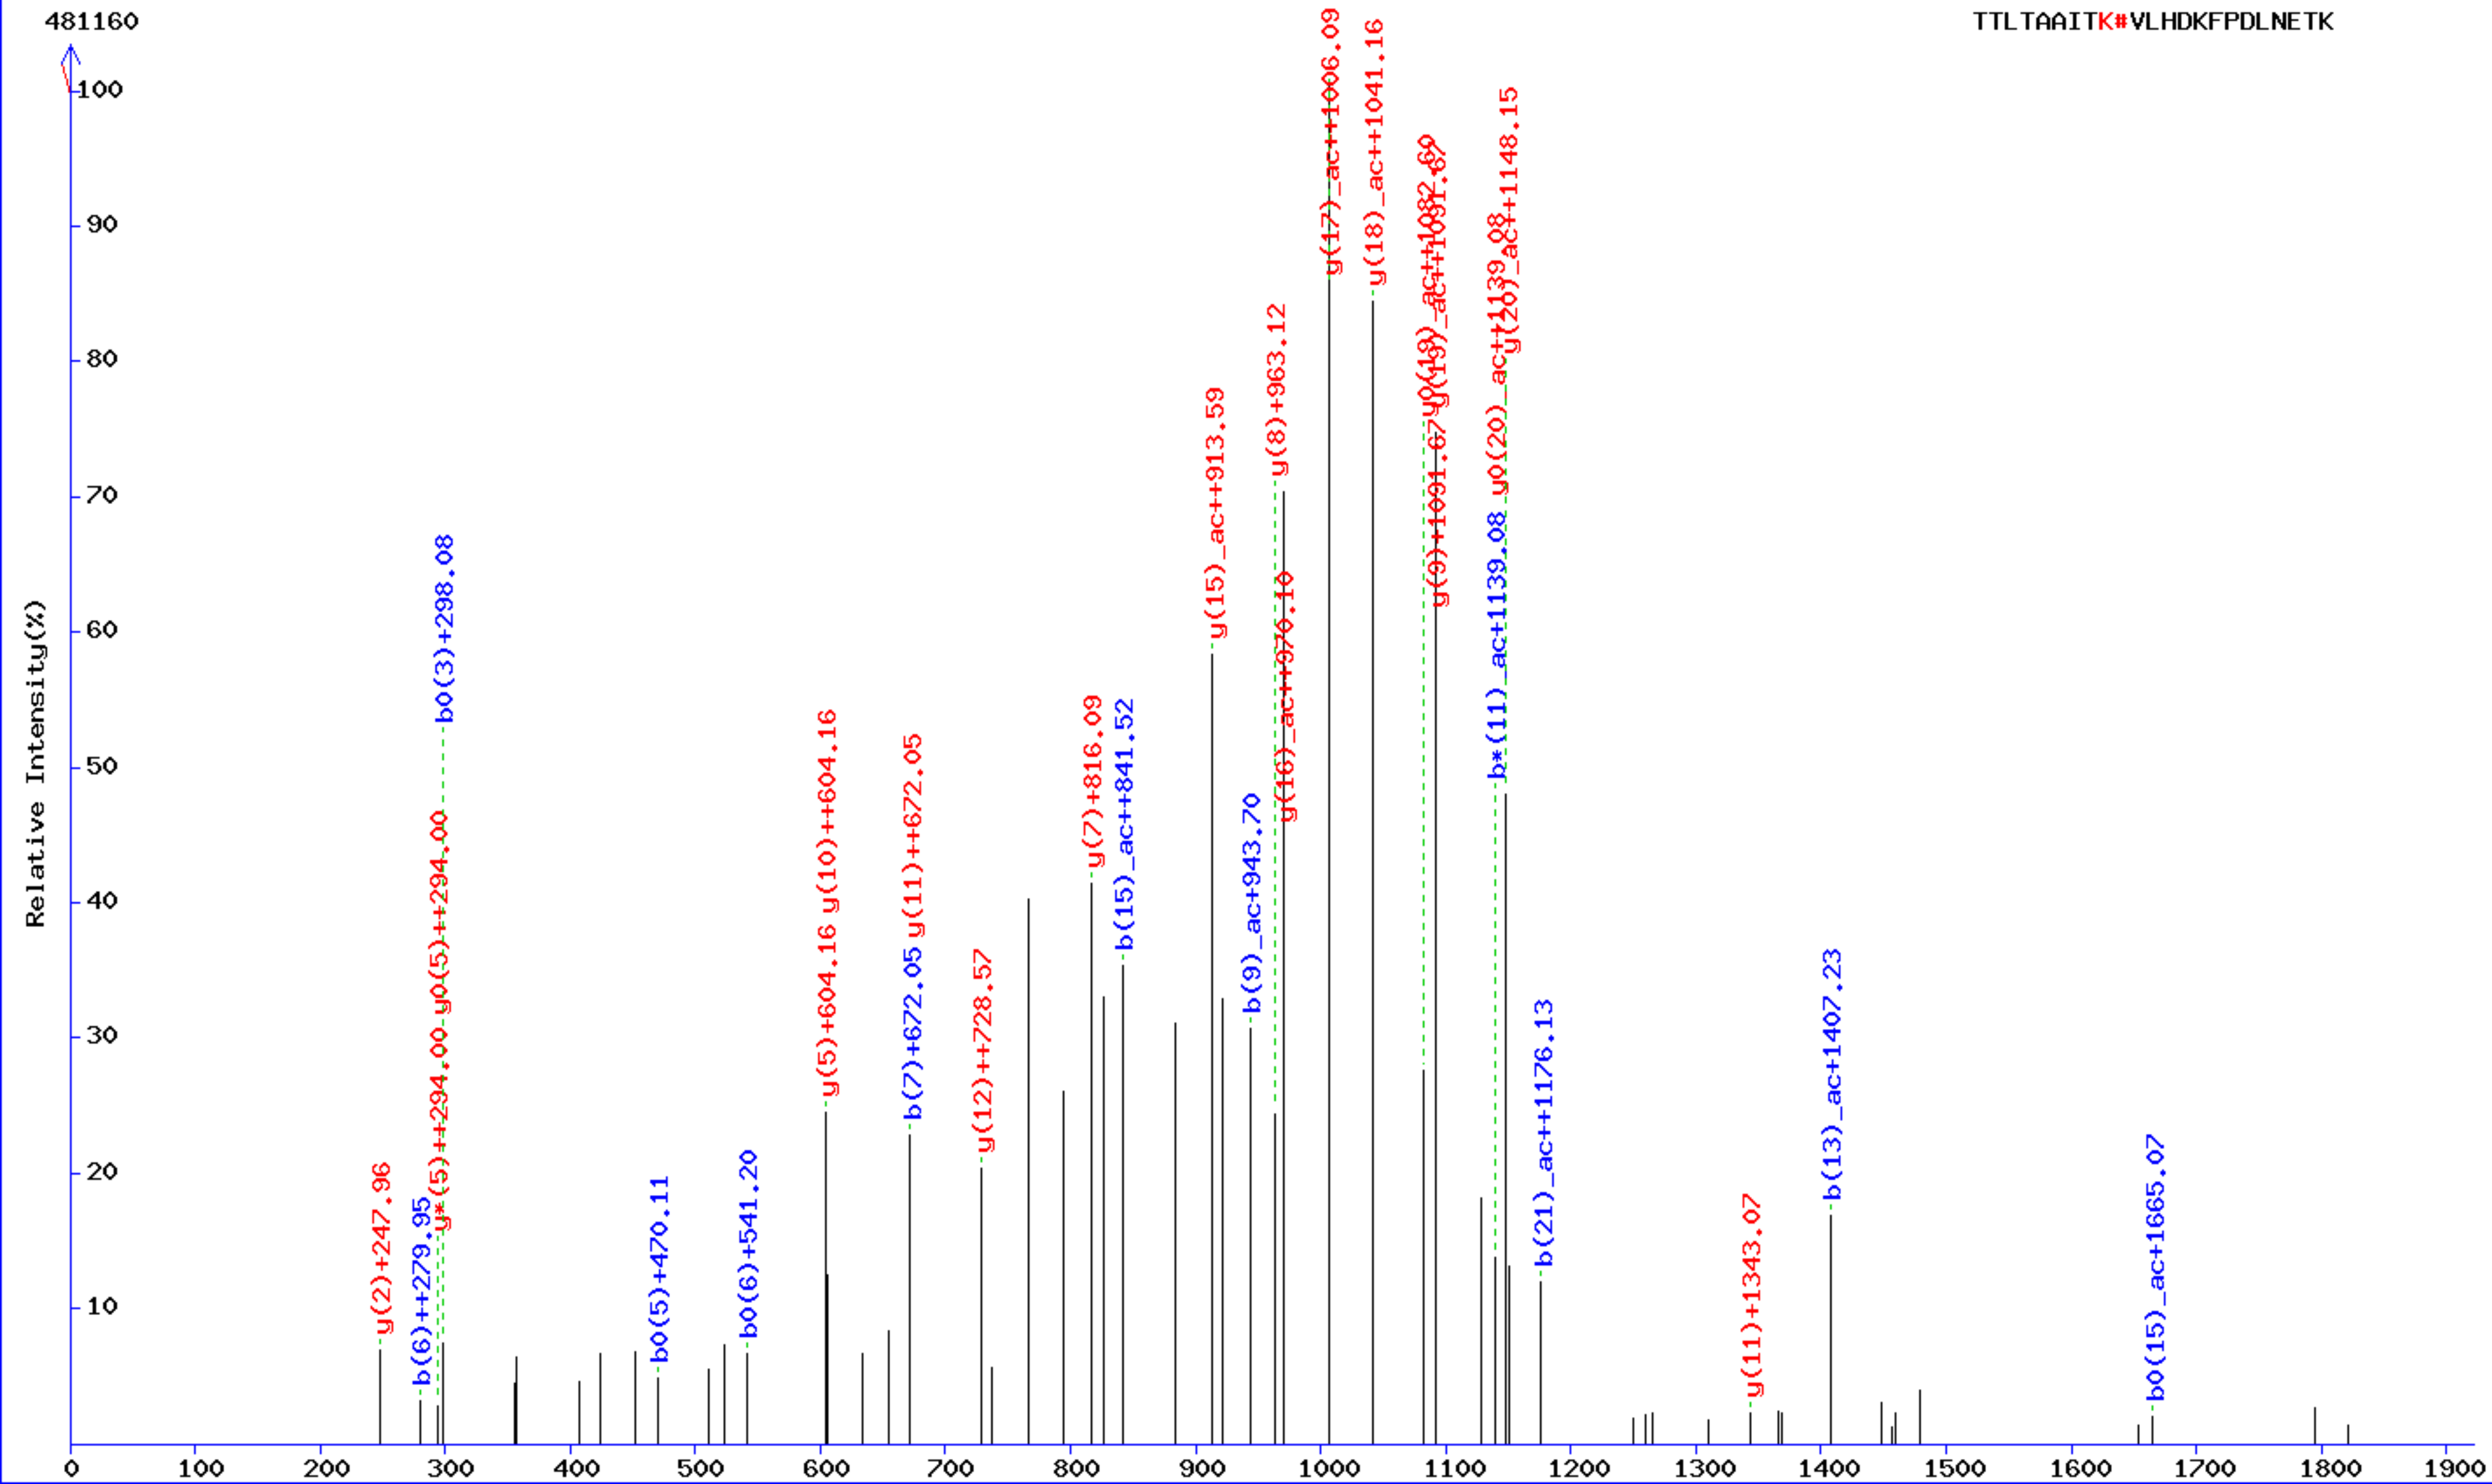

# gi|148663491 MRA\_3664 inorganic pyrophosphatase

NK#YEVDHETGR

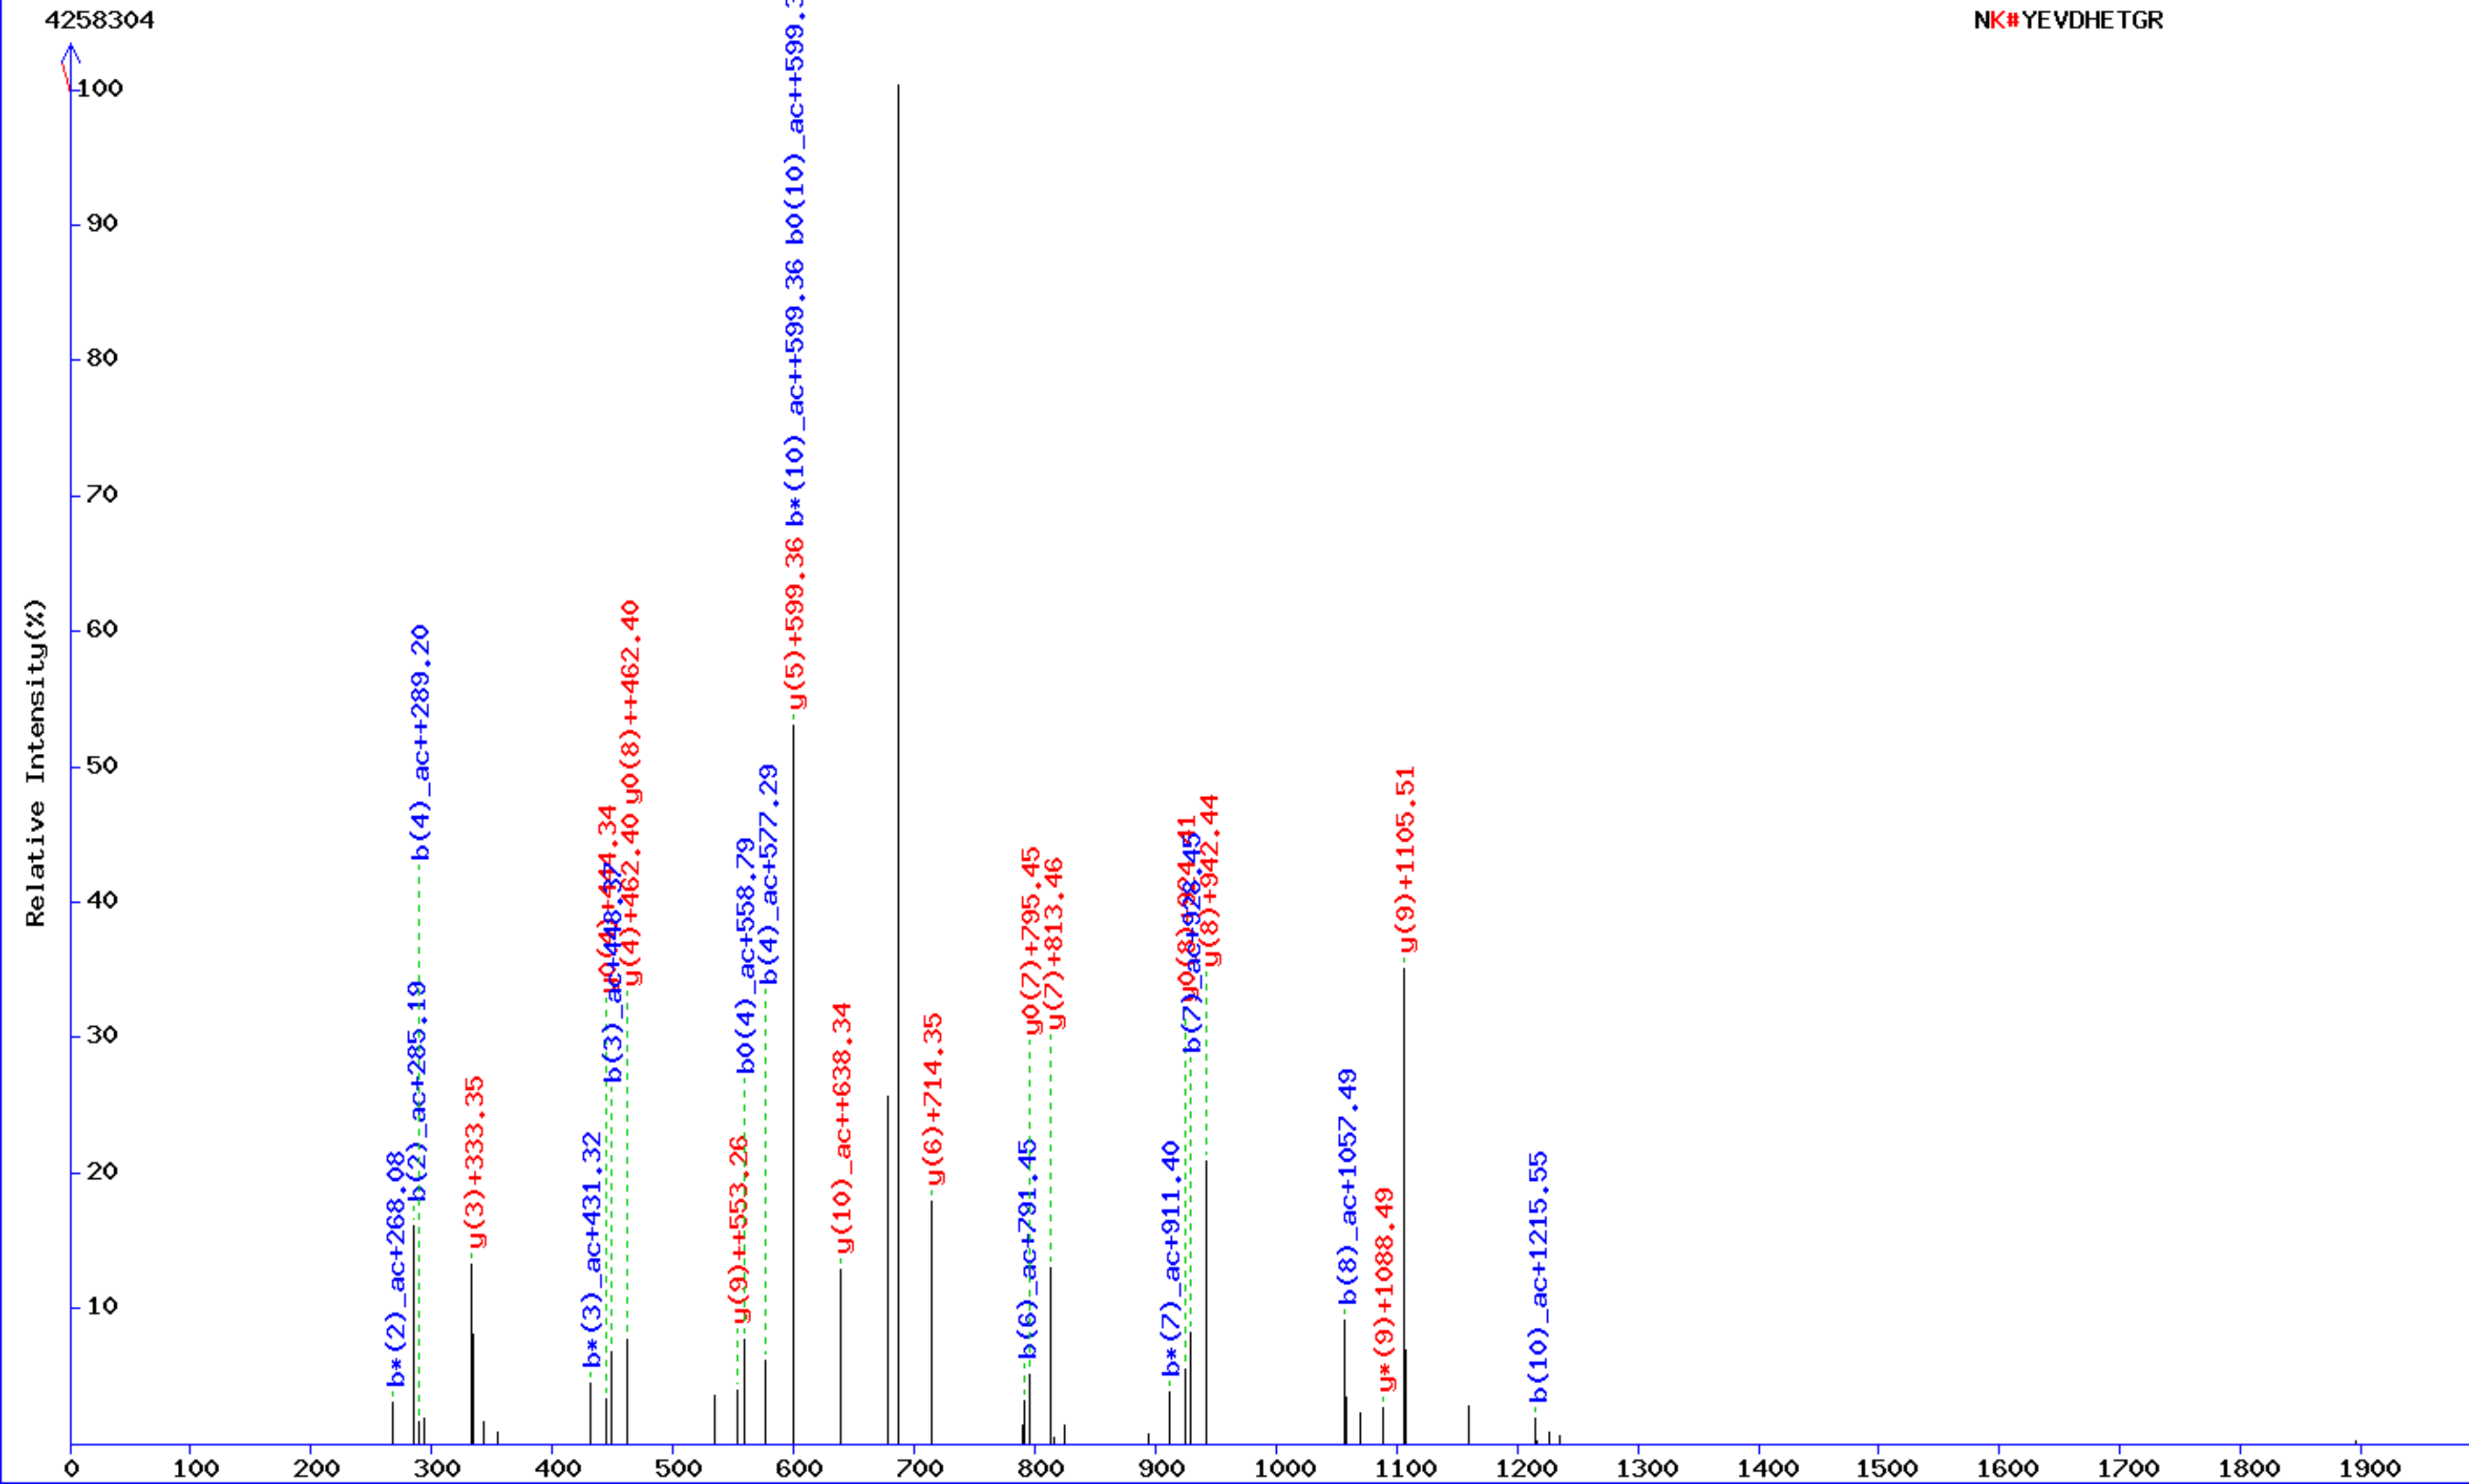

# gi|148660205 MRA\_0445 molecular chaperone GroEL

QE IENSDSDYDREK#LQER

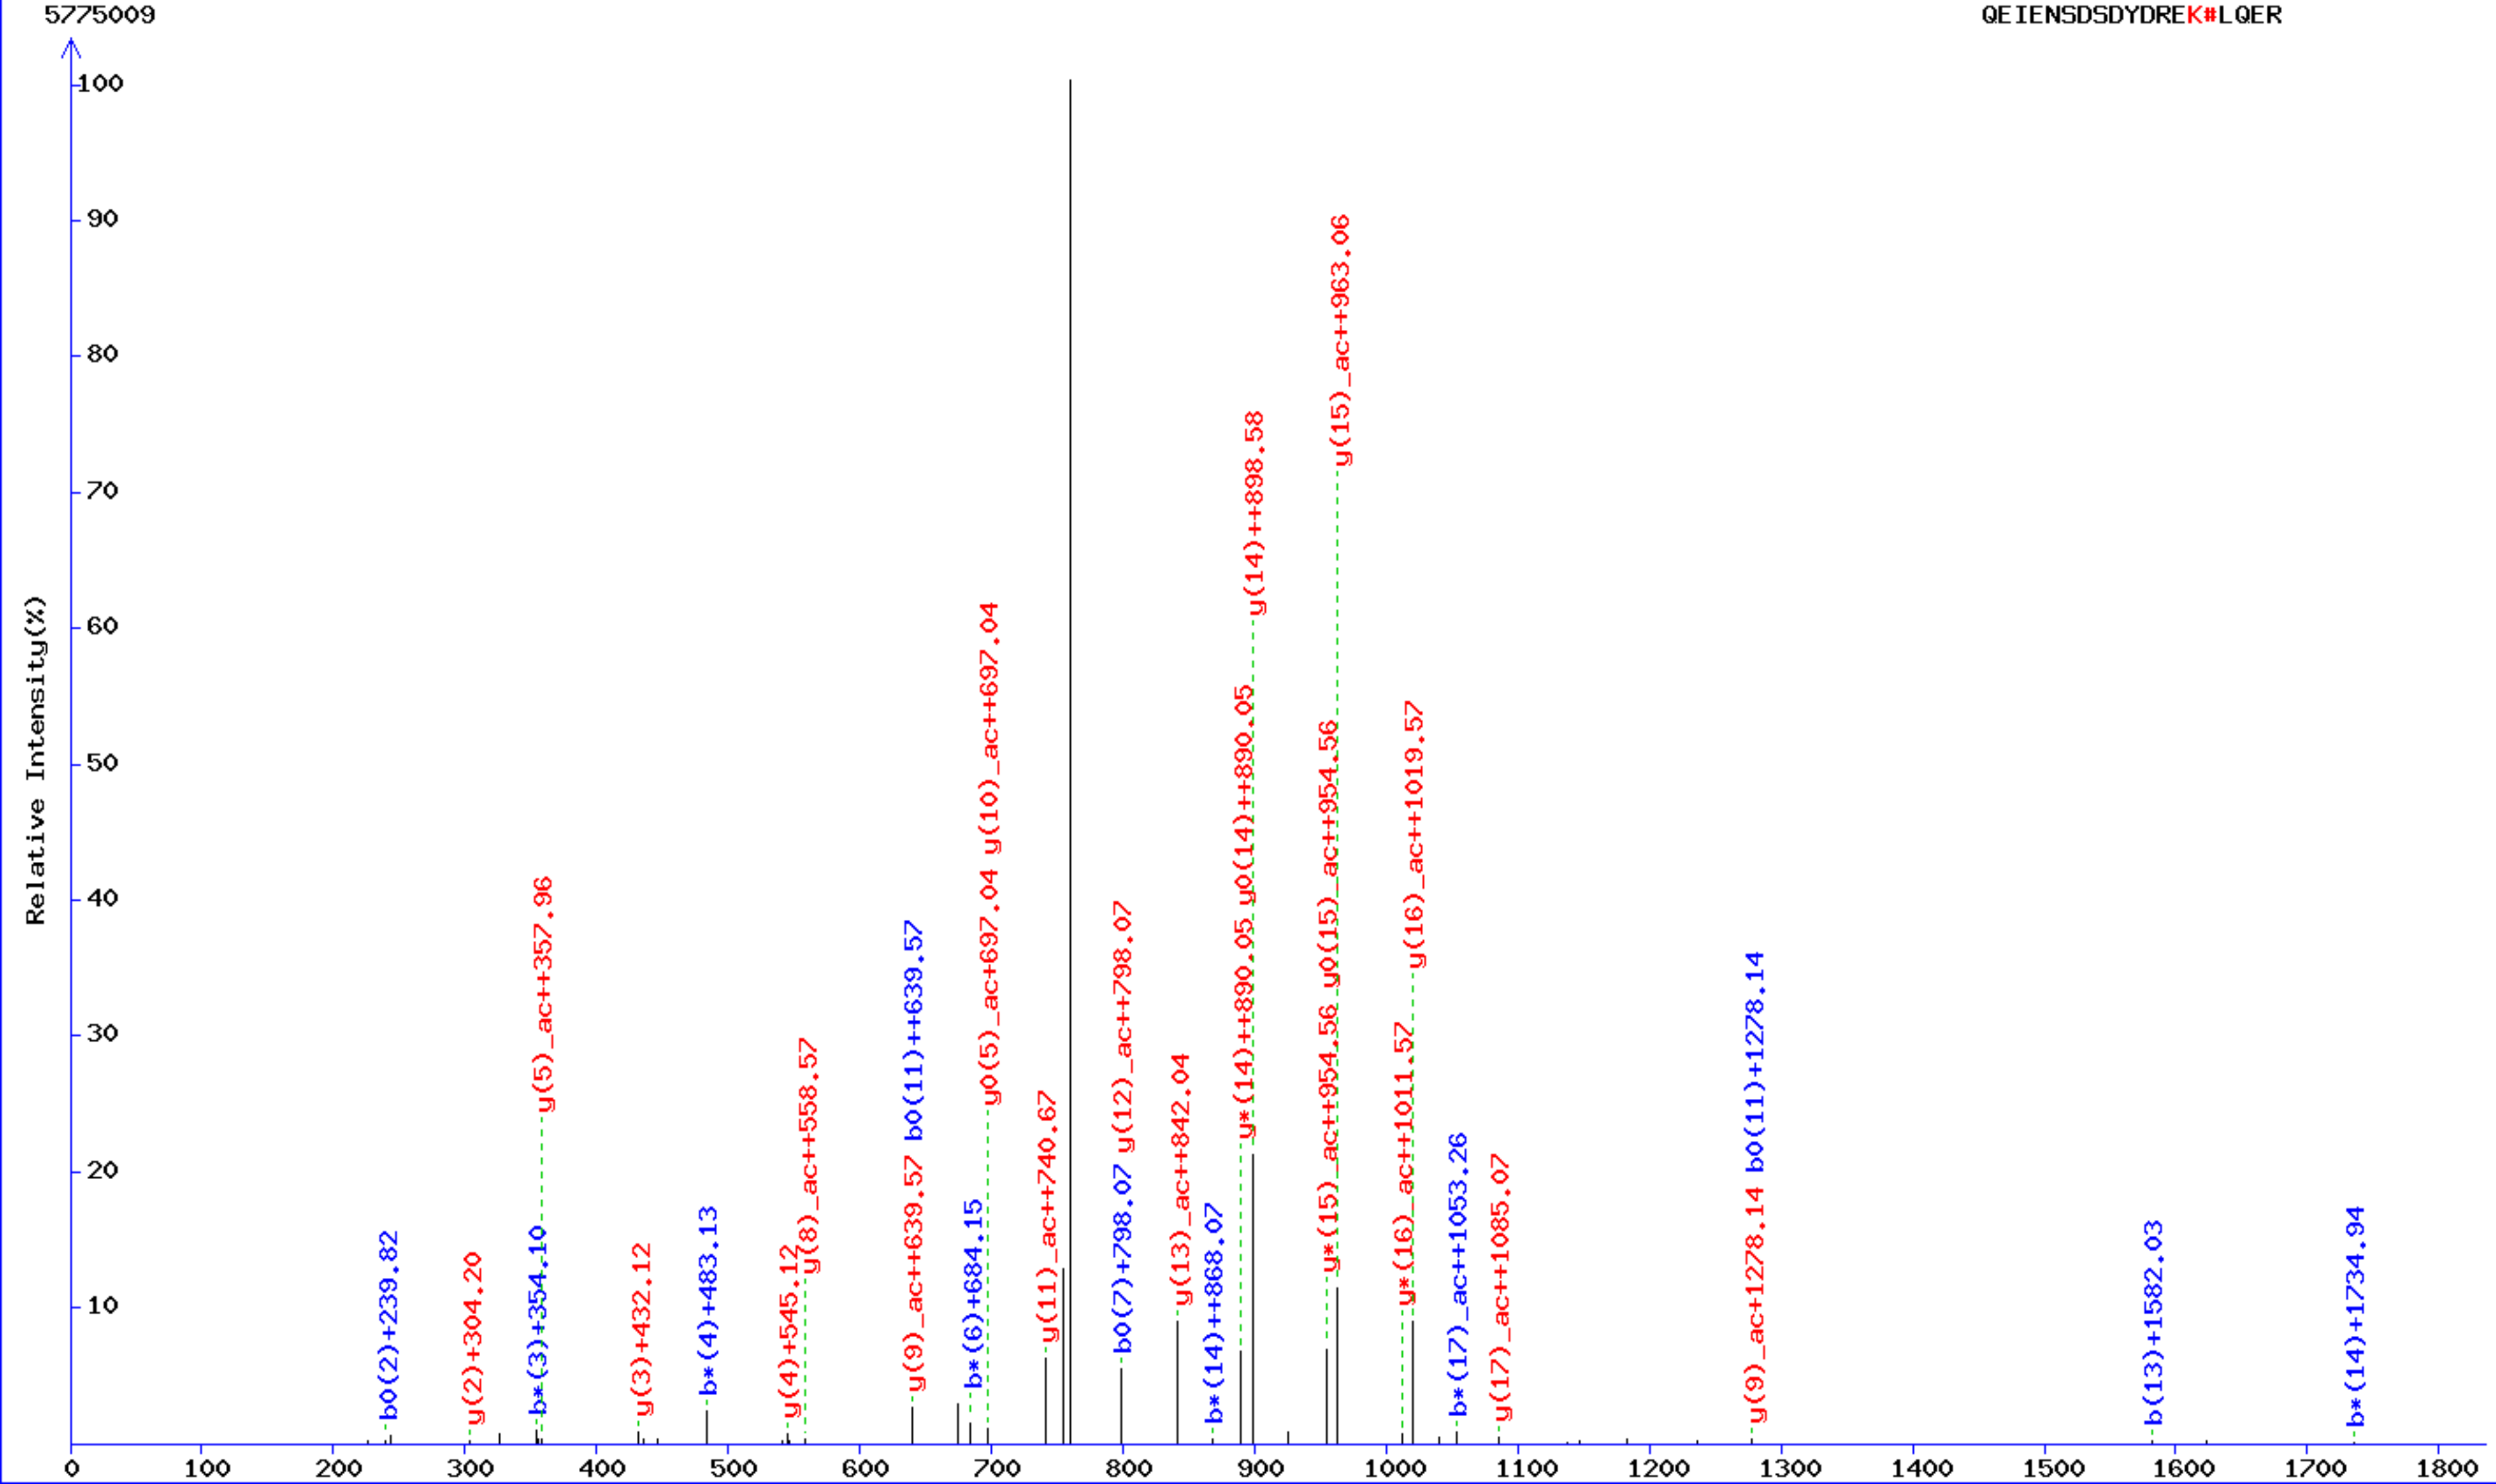

gi|148659975 MRA\_0219 phosphoenolpyruvate carboxykinase

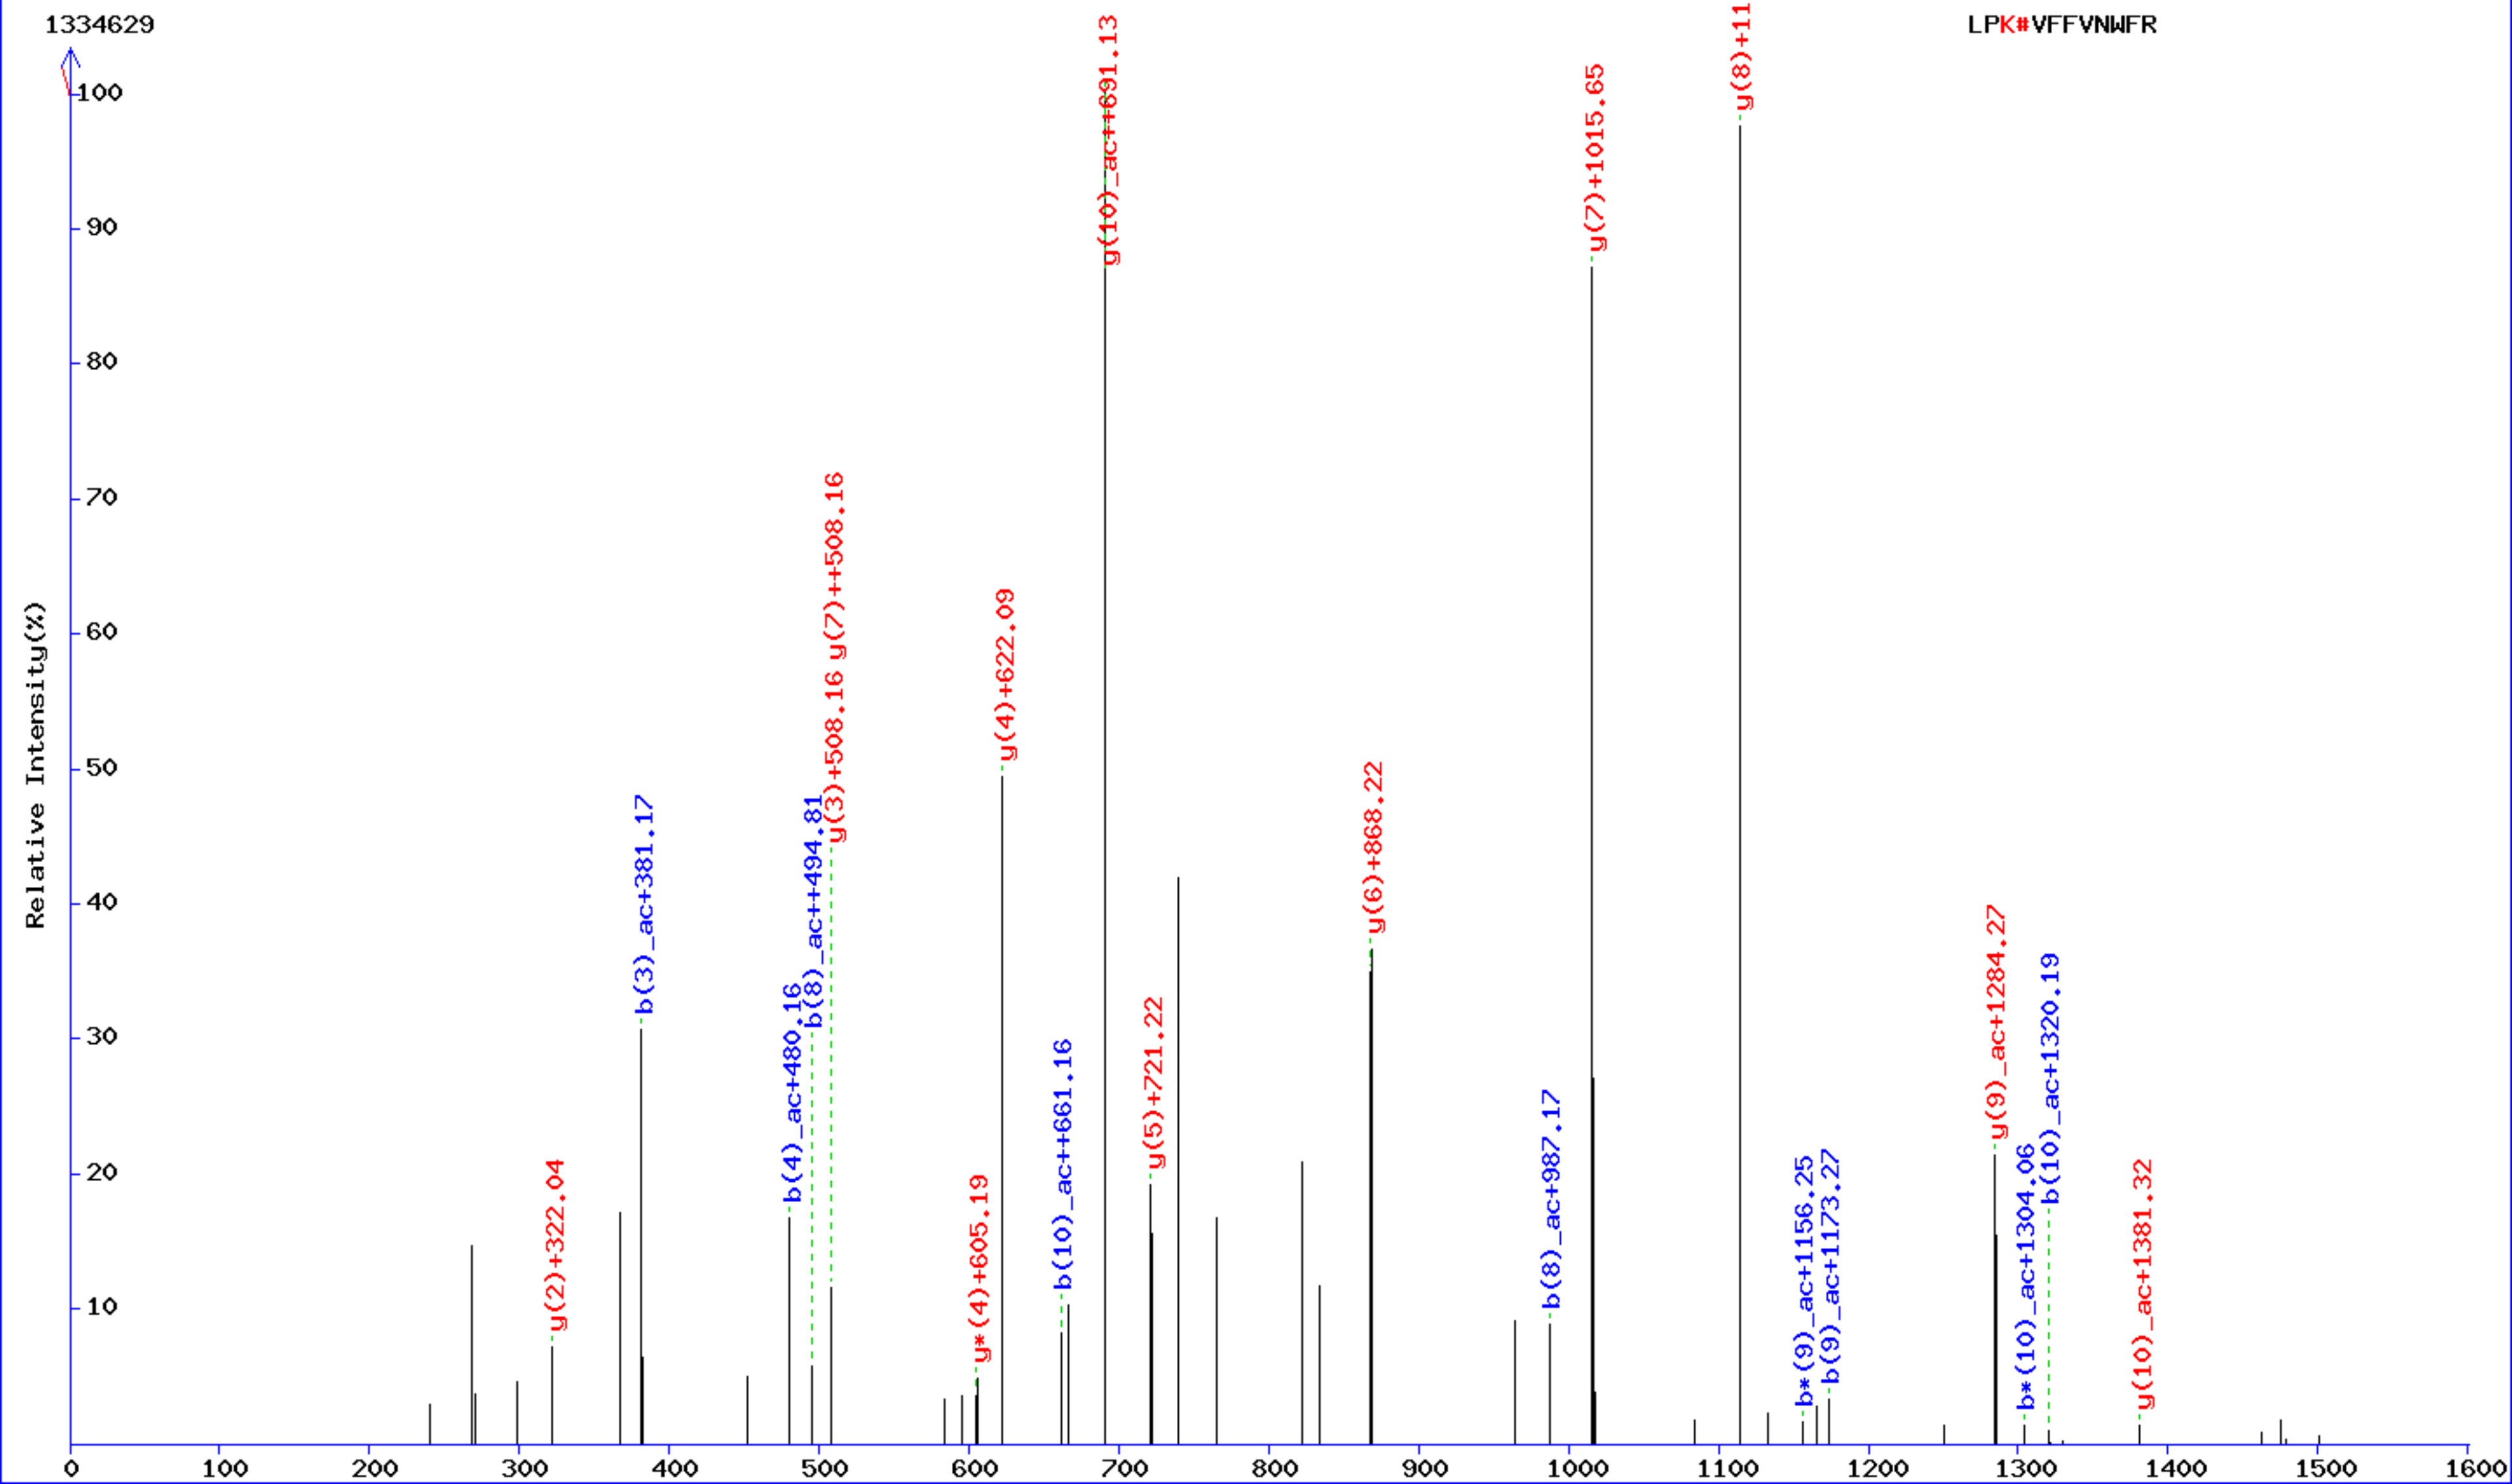

# gi|148659995 MRA\_0239 acyl-CoA dehydrogenase

GVEK#DTFFETVAR

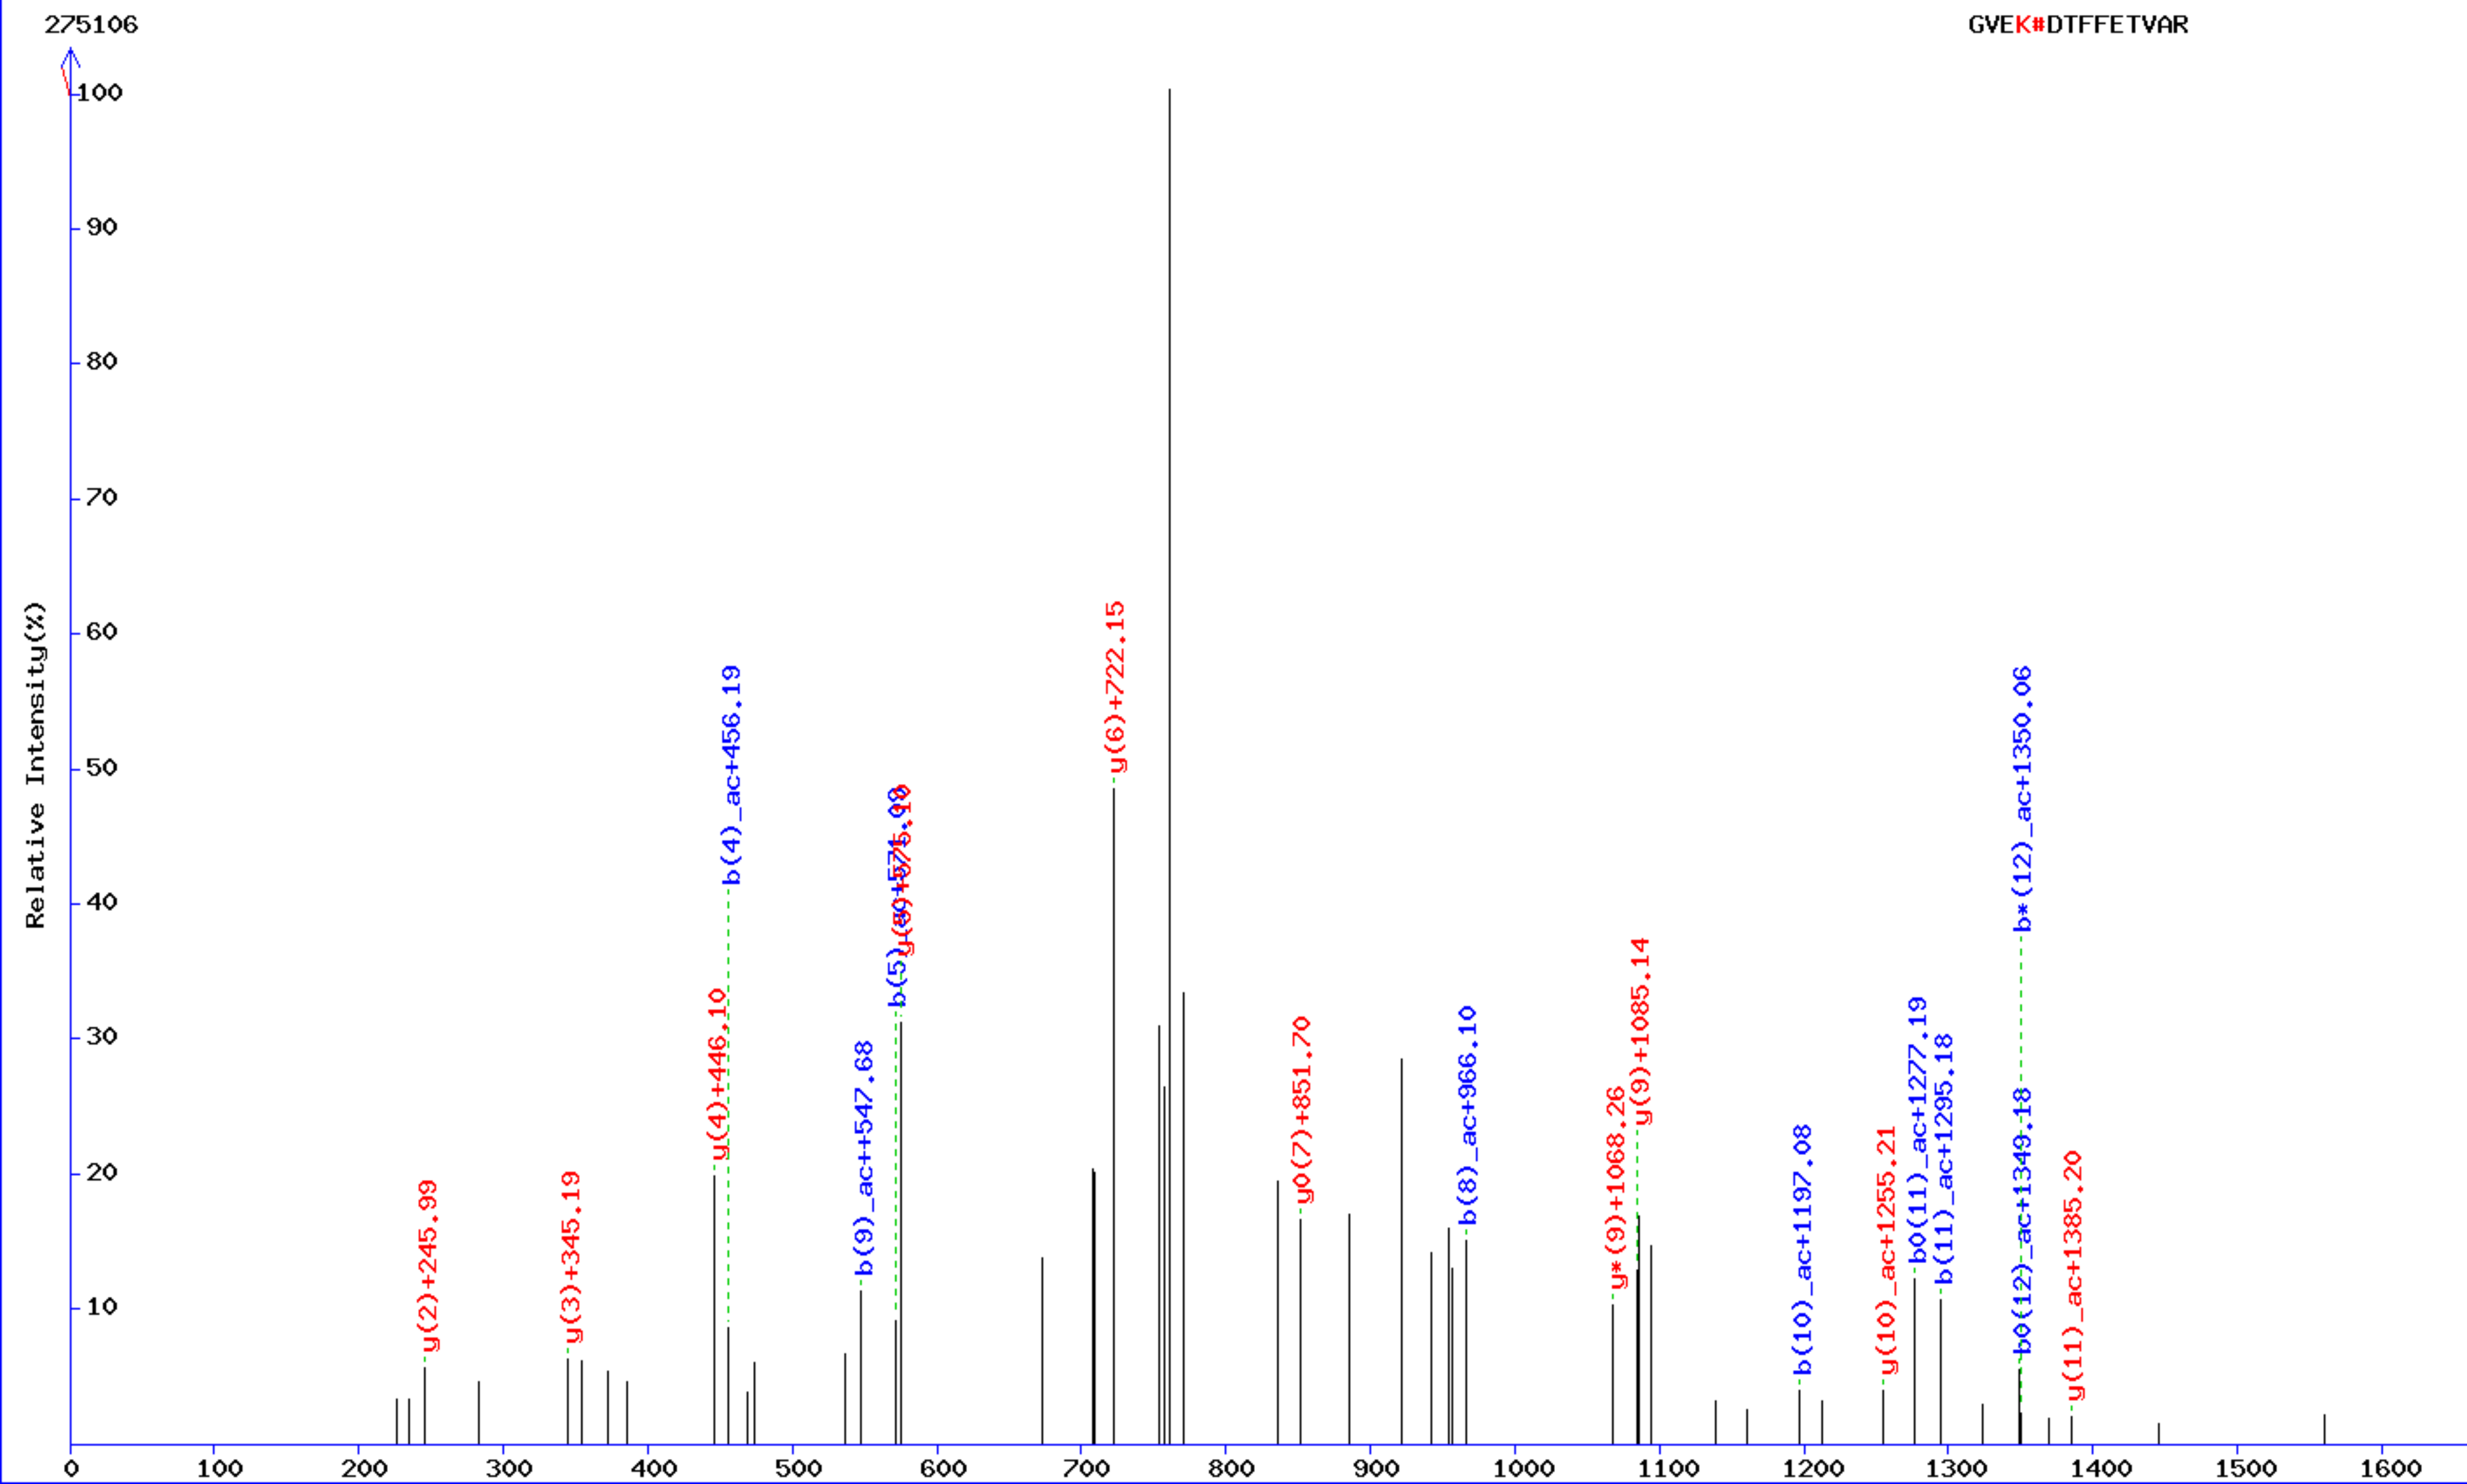



# gi|148660228 MRA\_0468 dihydrolipoamide dehydrogenase

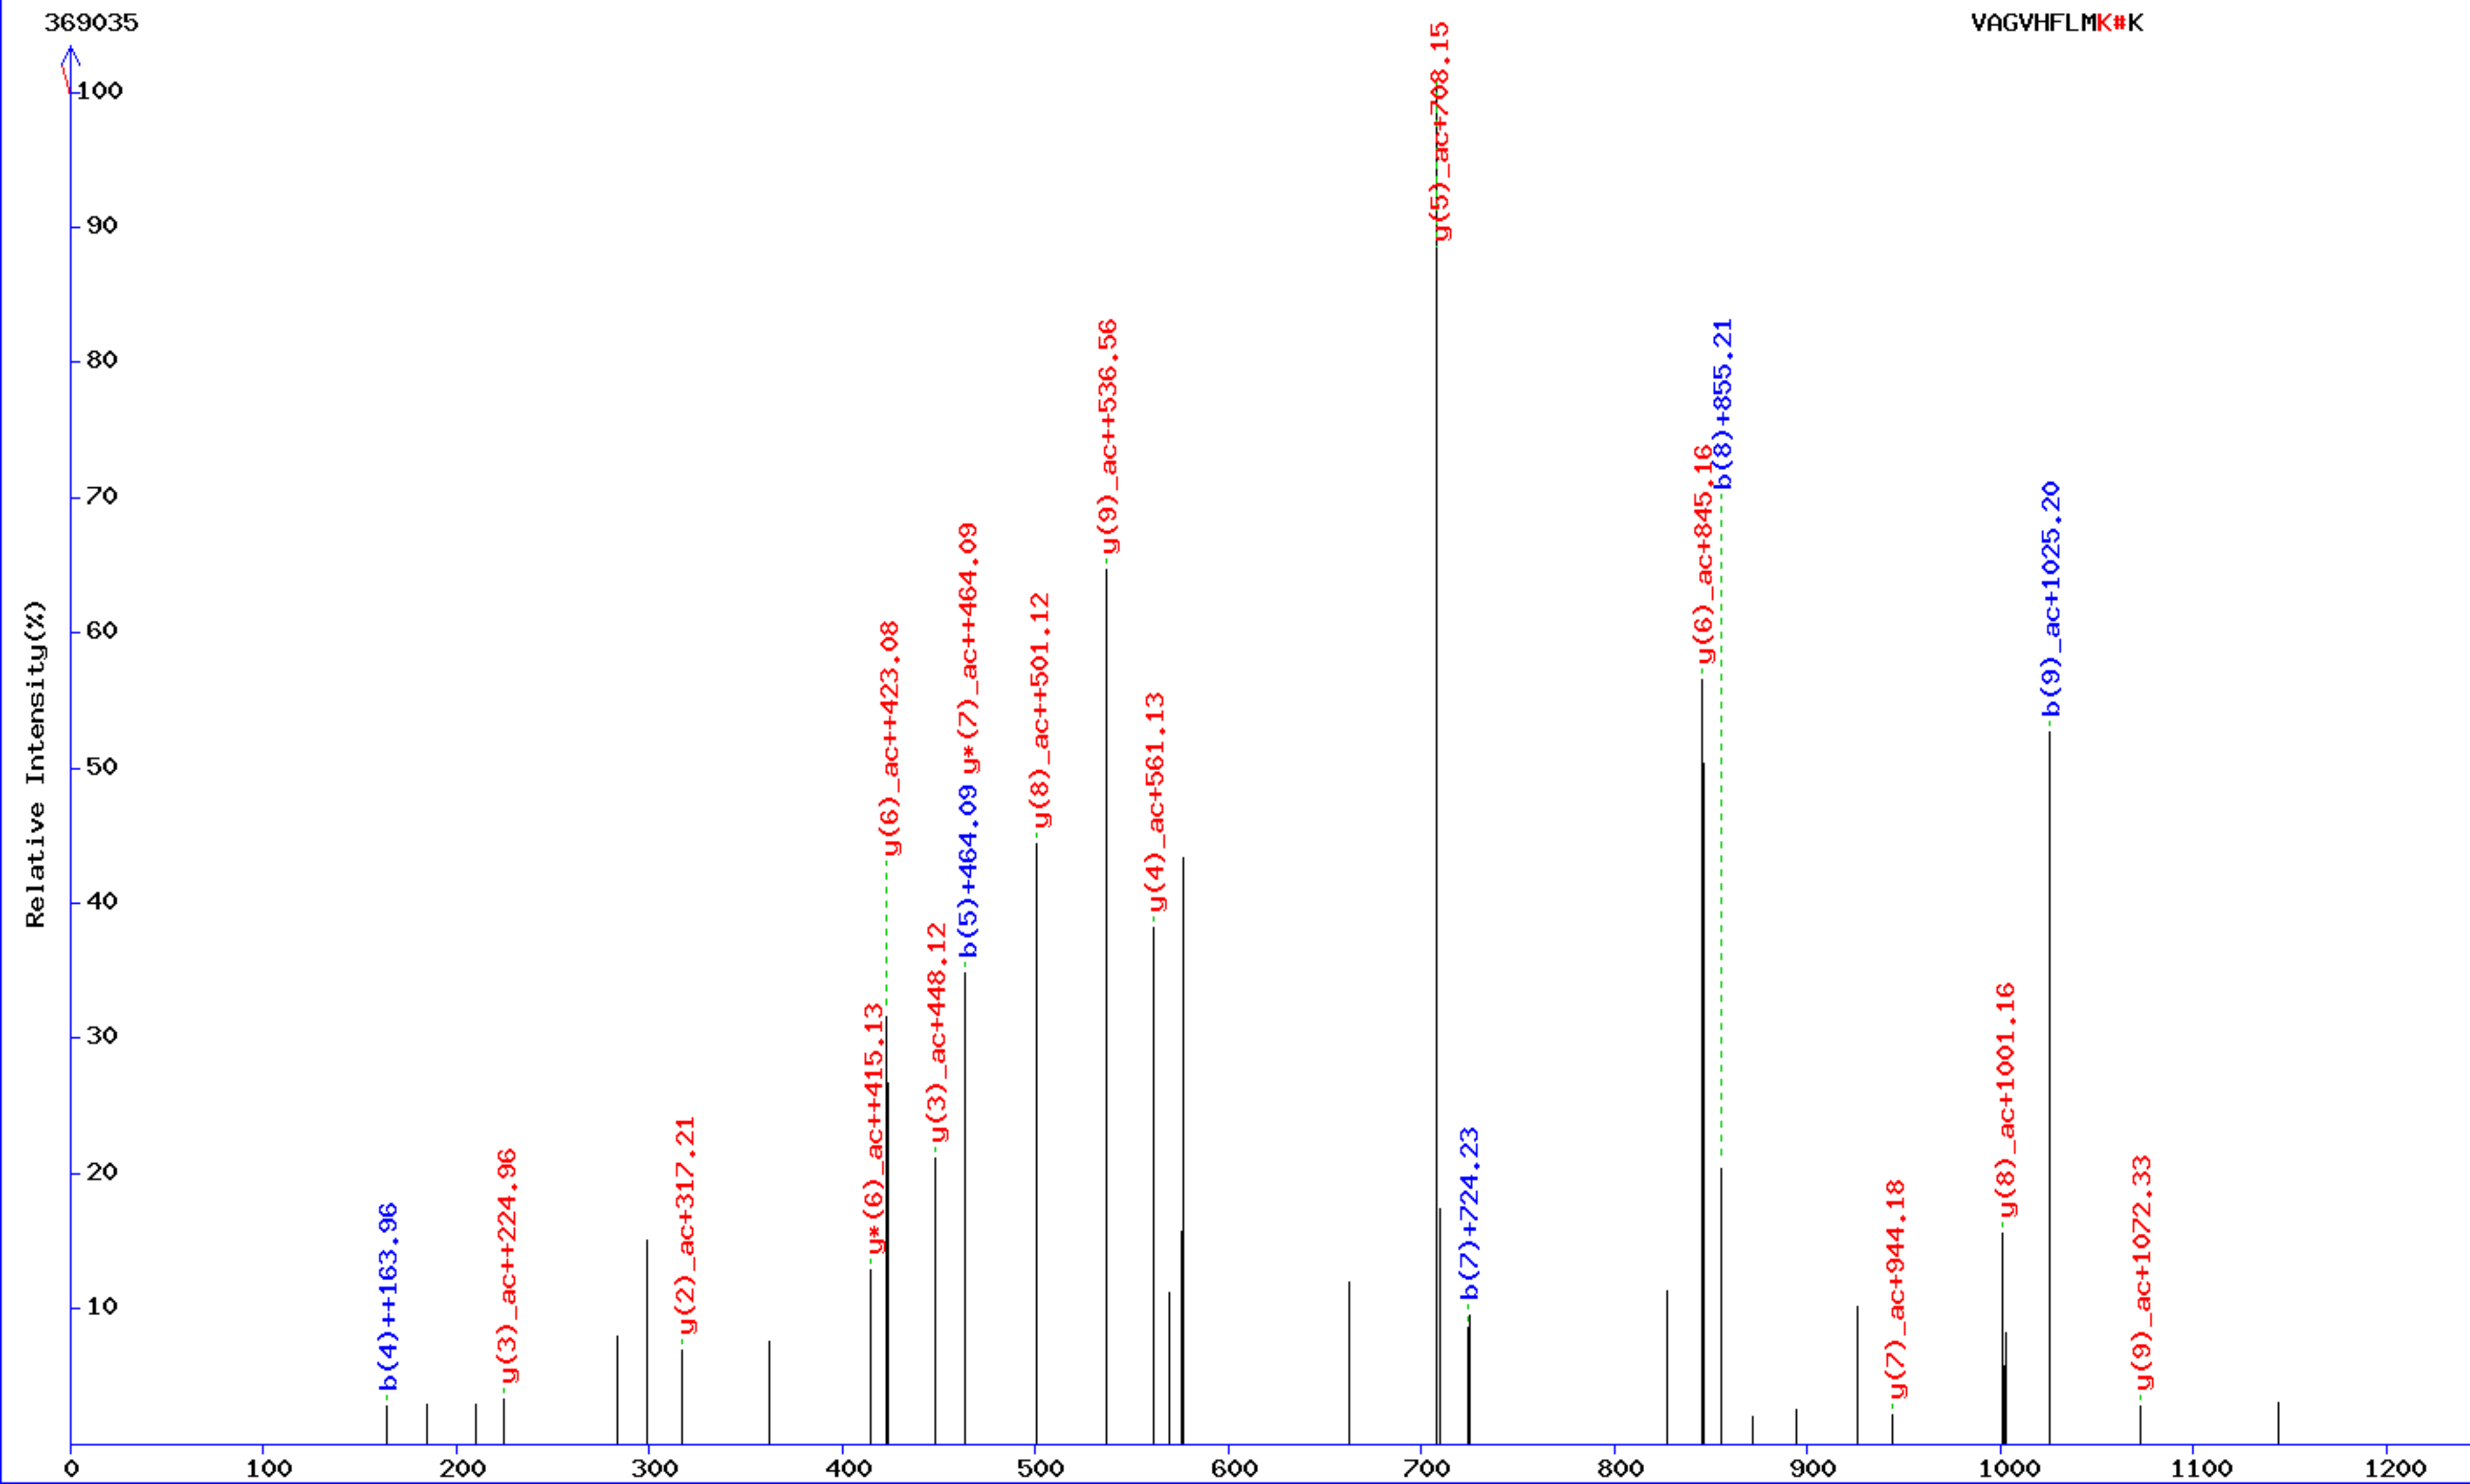

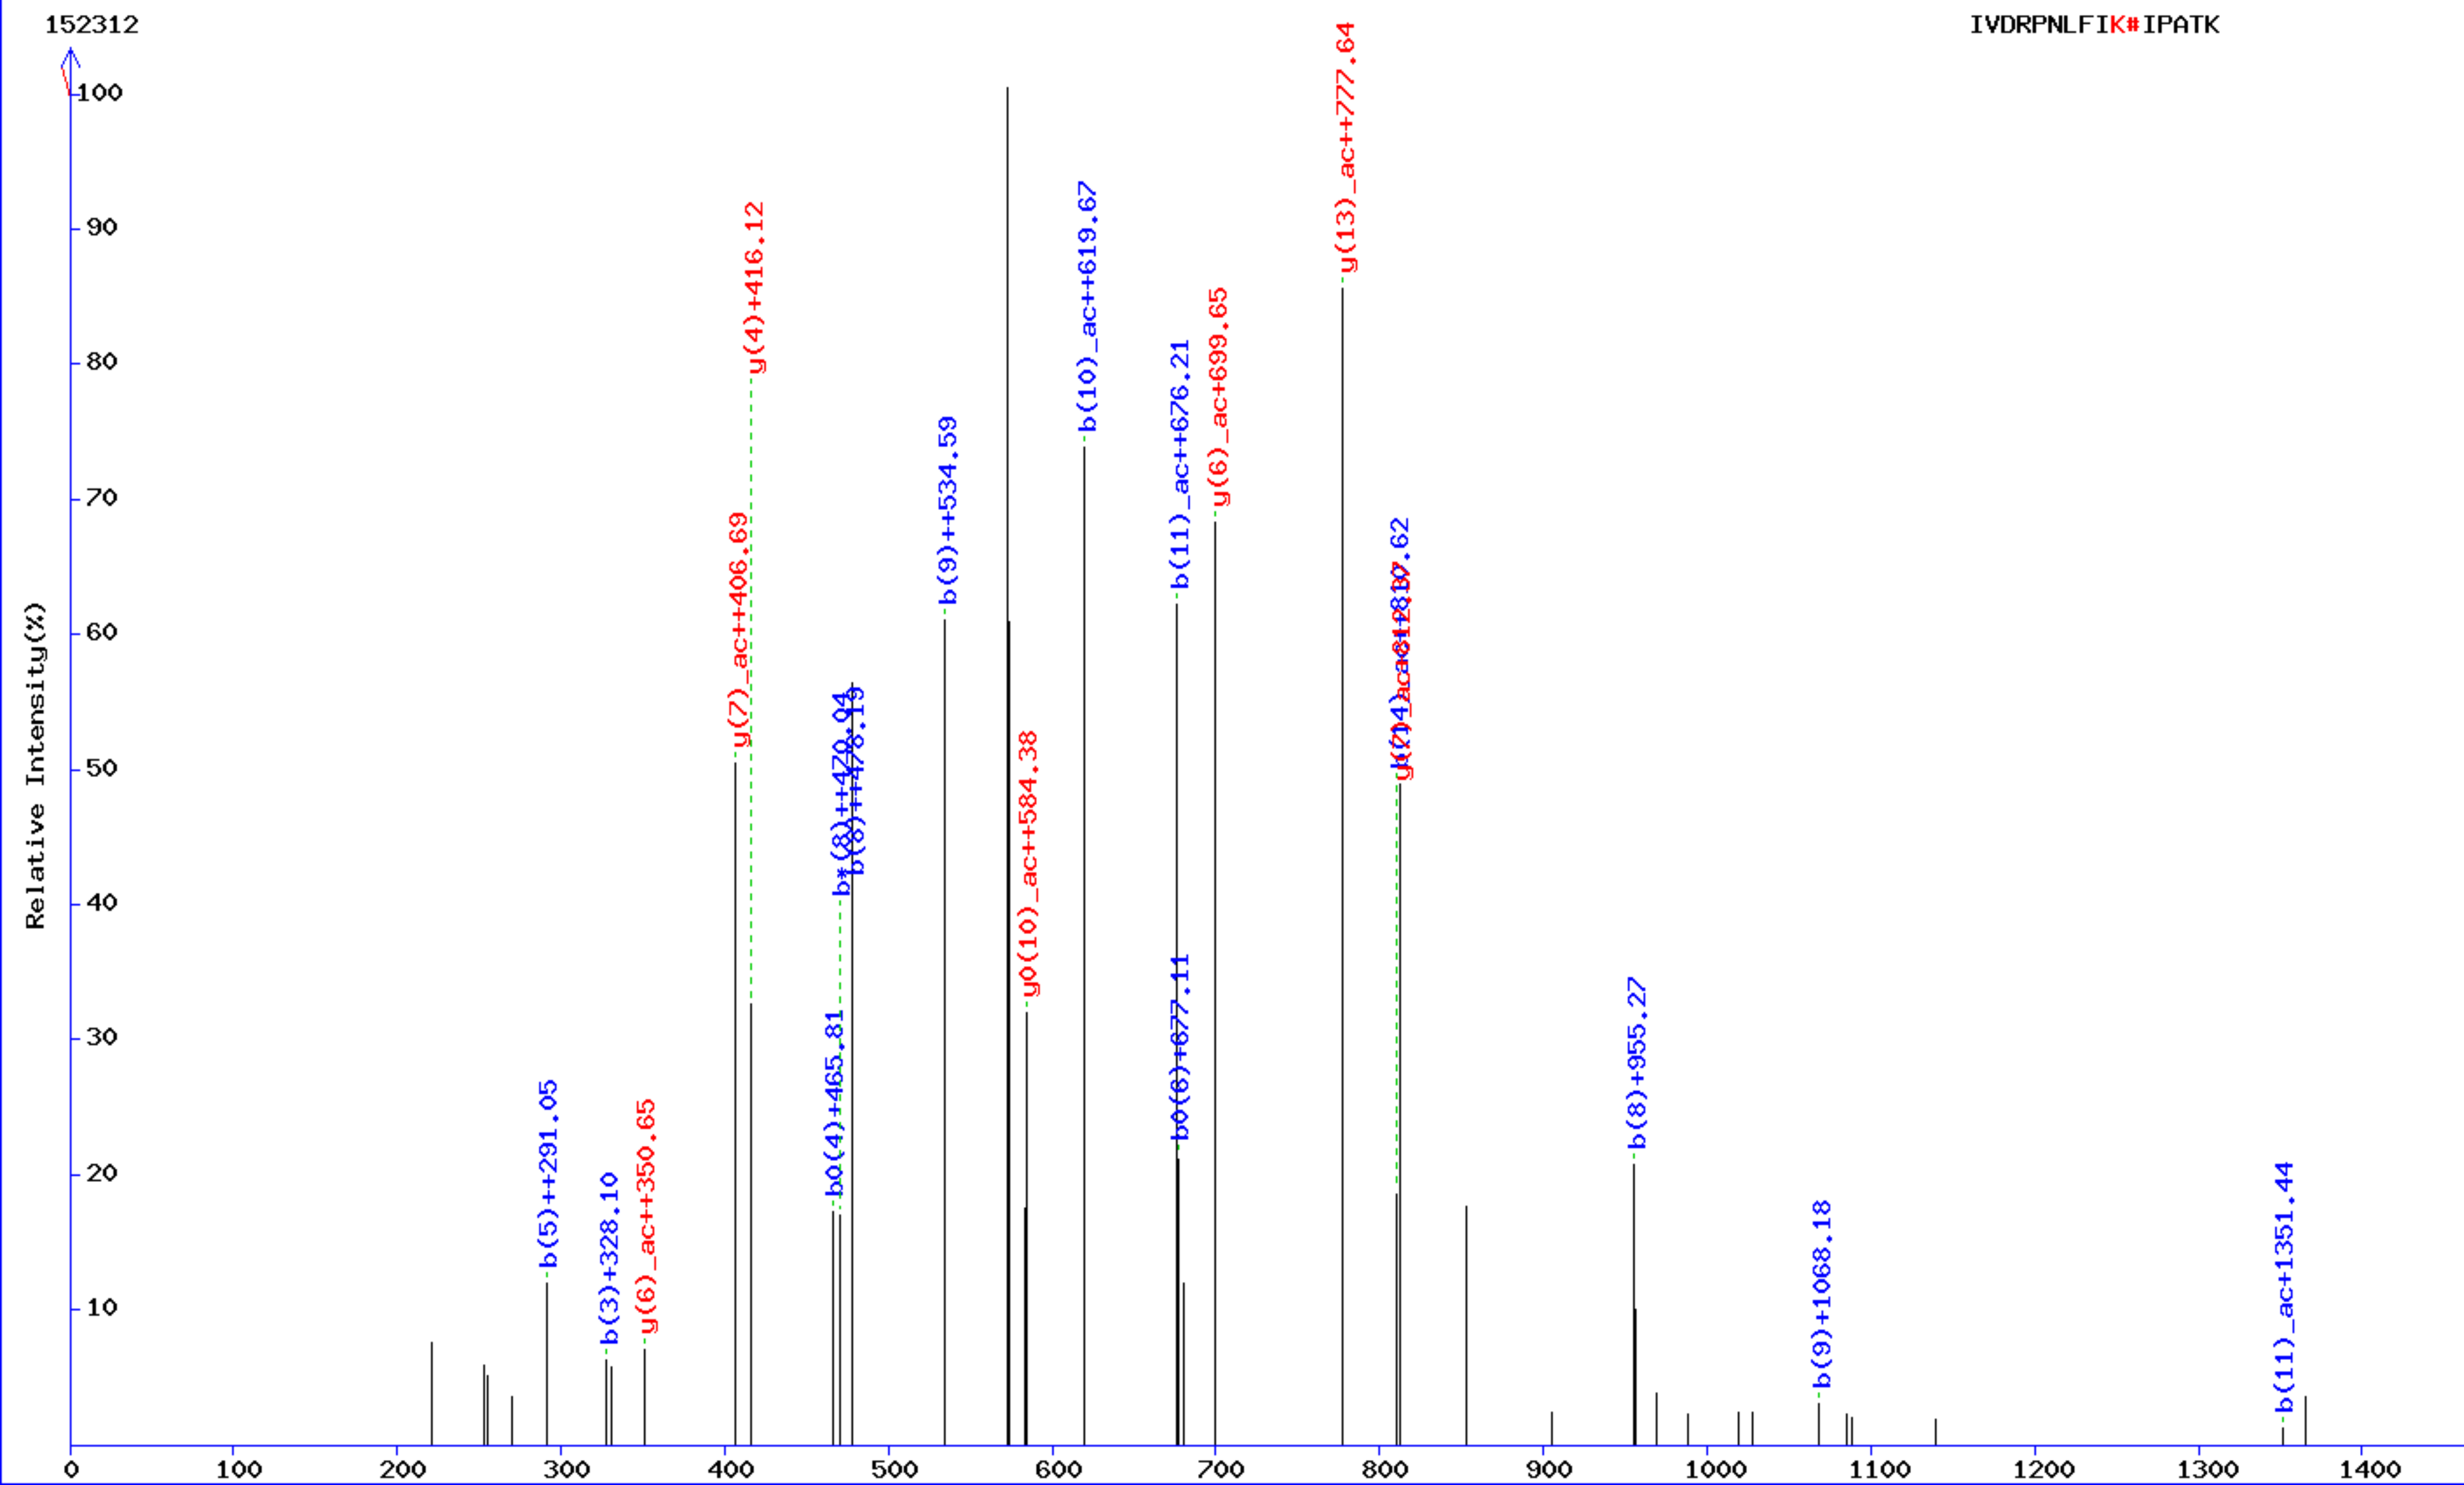

# gi|148661431 MRA\_1646 hypothetical protein

AADILK#DESYK

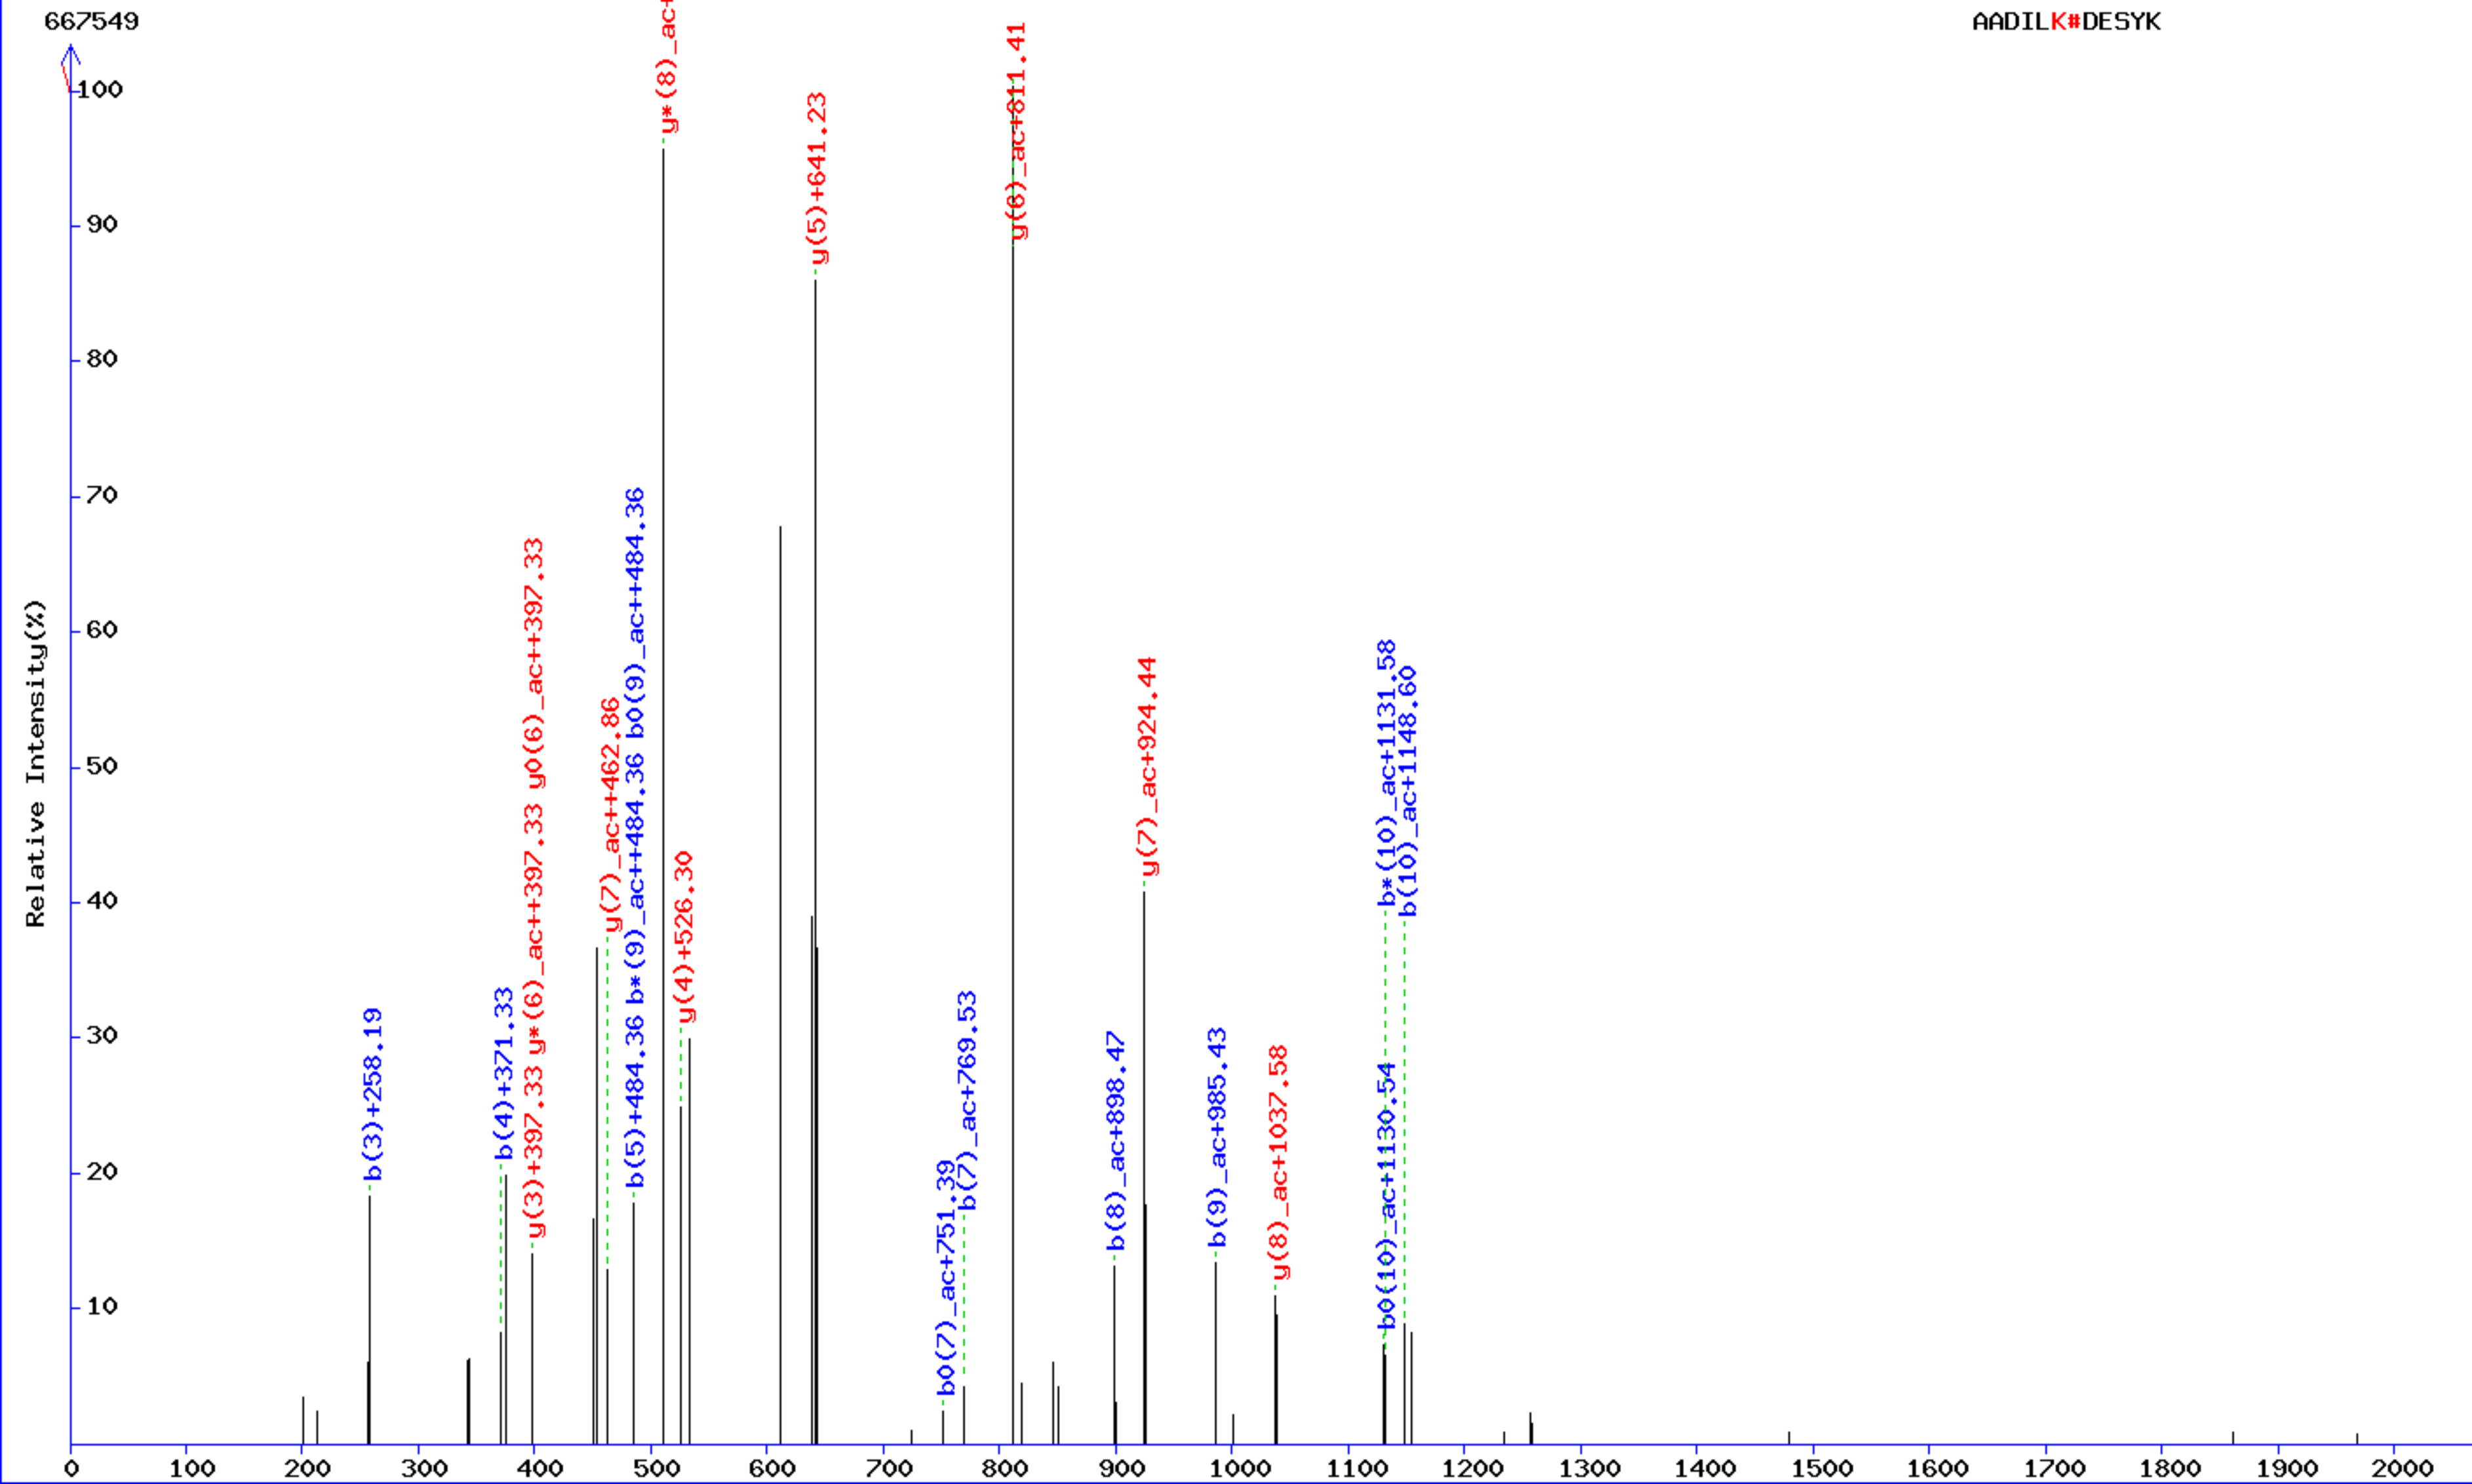

# gi|148663491 MRA\_3664 inorganic pyrophosphatase

DLEPGK#FVK

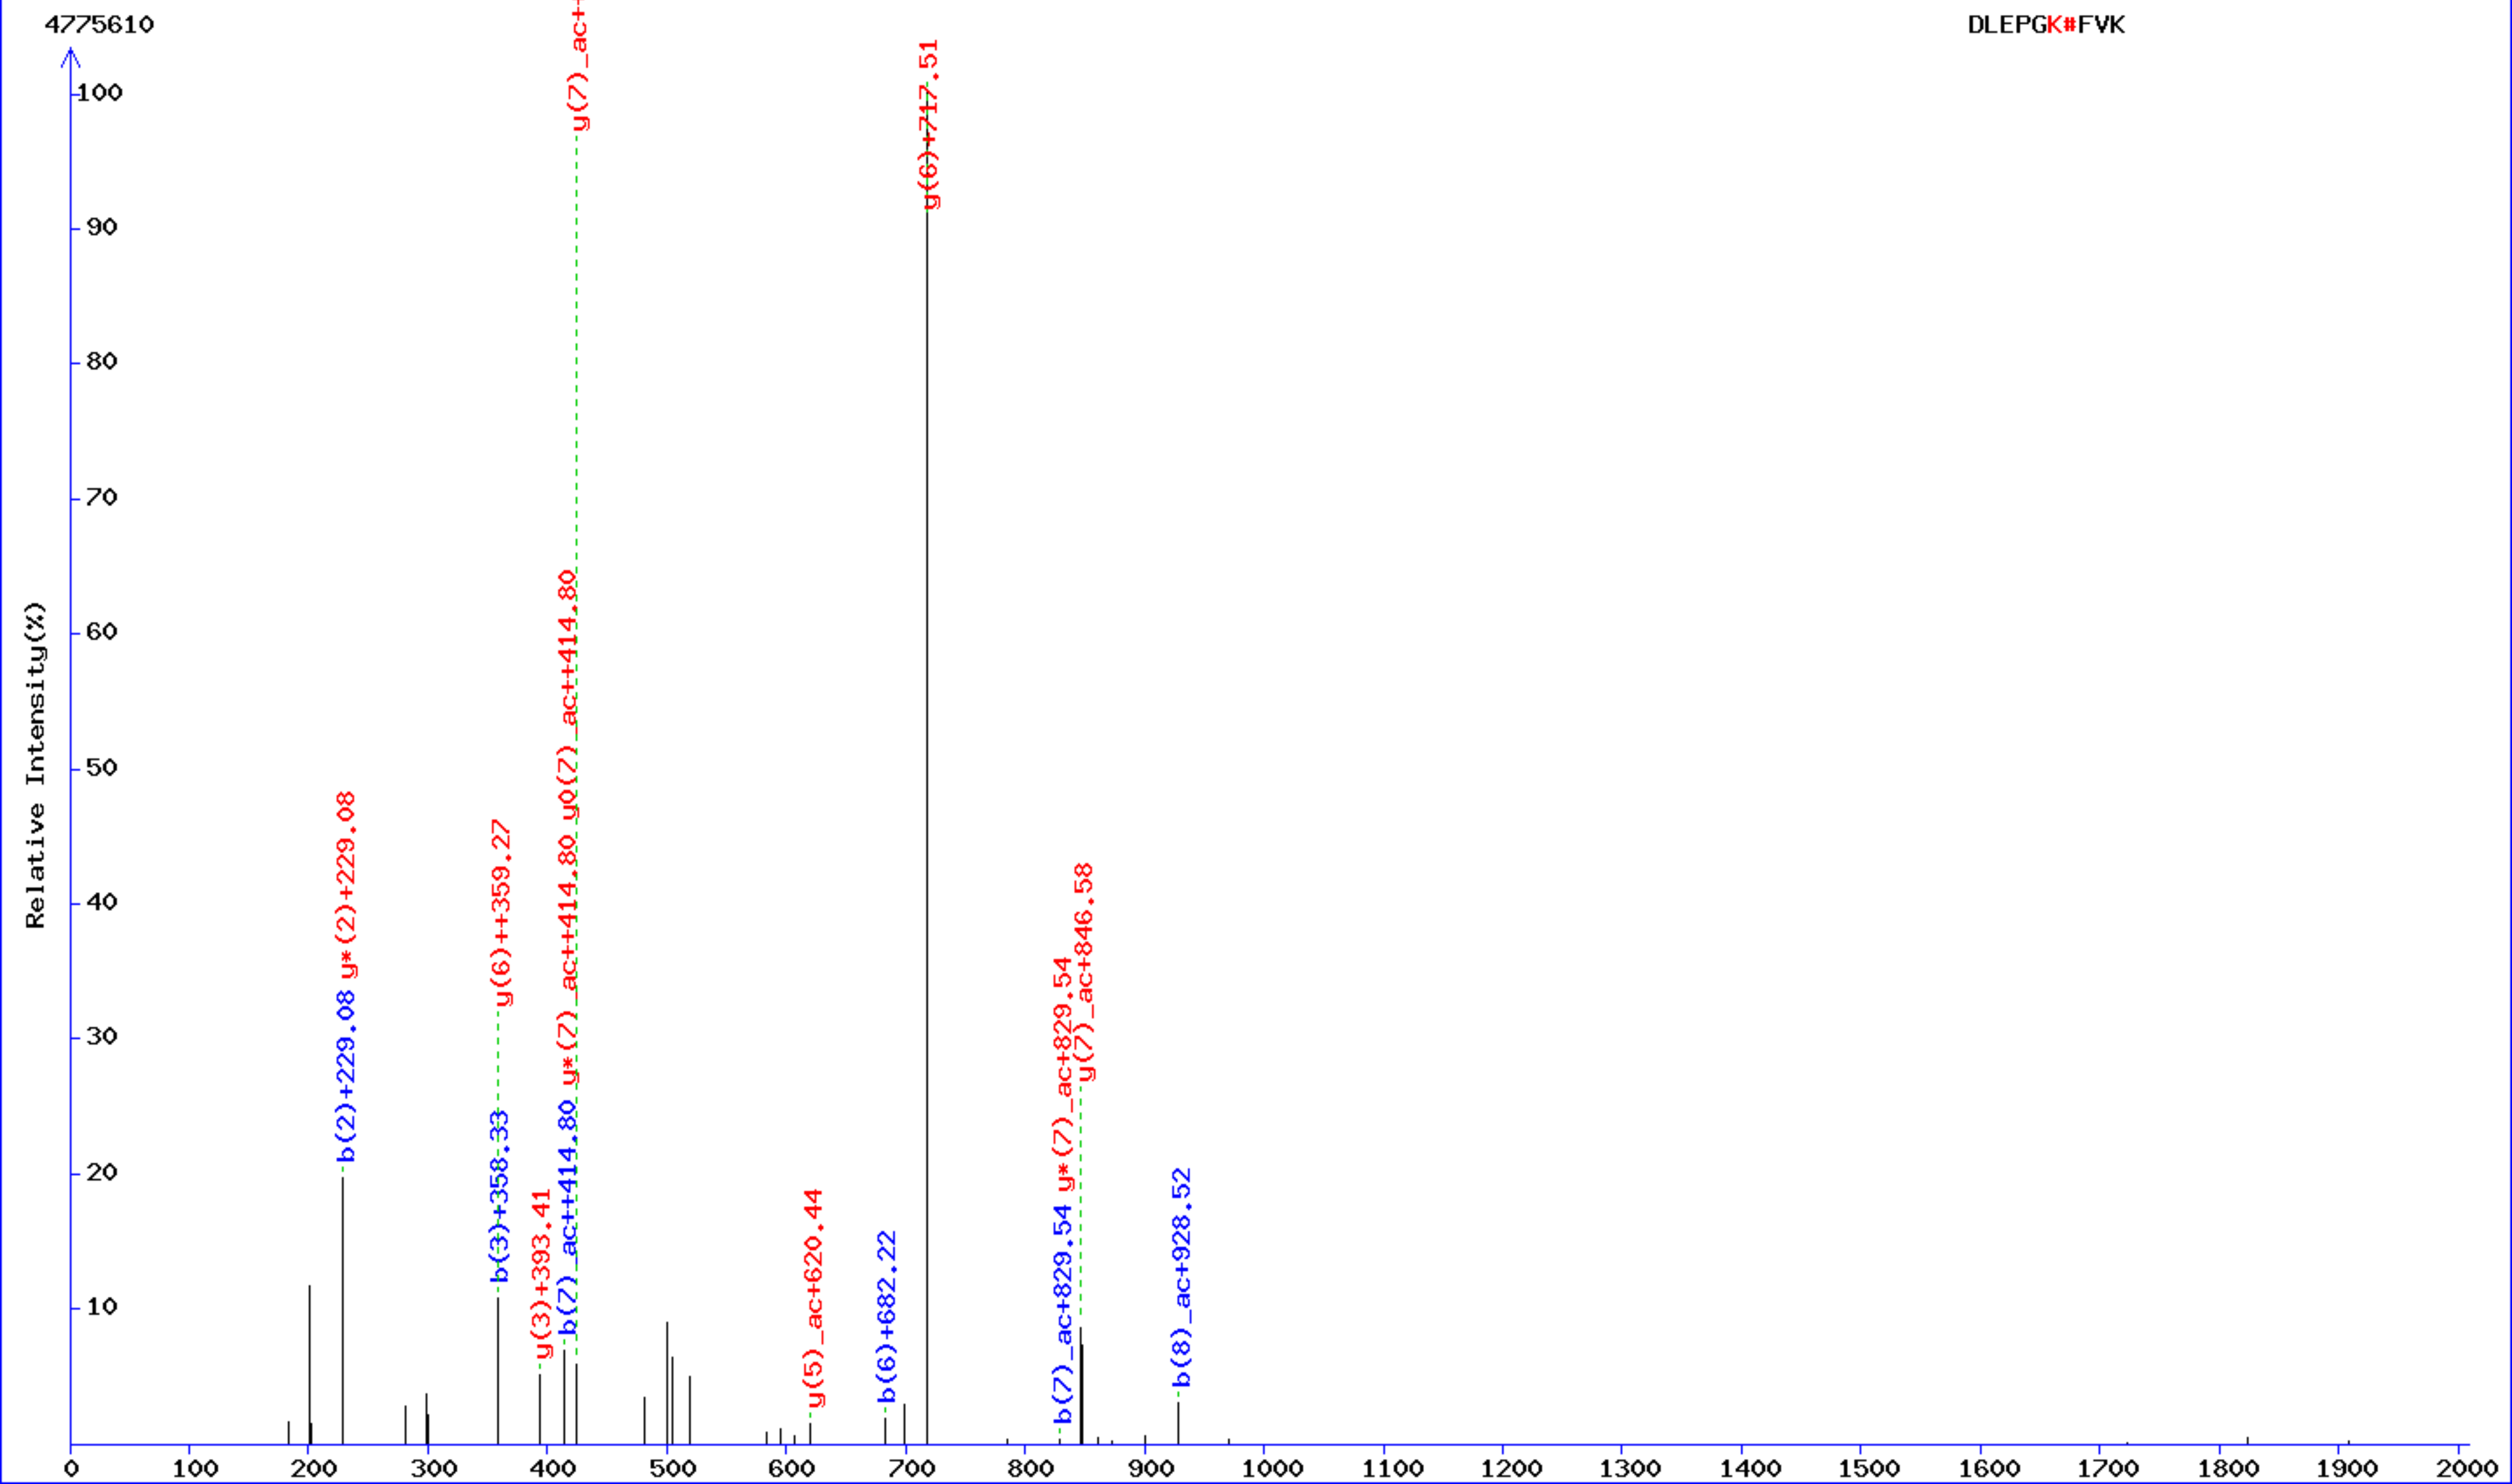

# gi|148660205 MRA\_0445 molecular chaperone GroEL

AVEK#VTETLLK

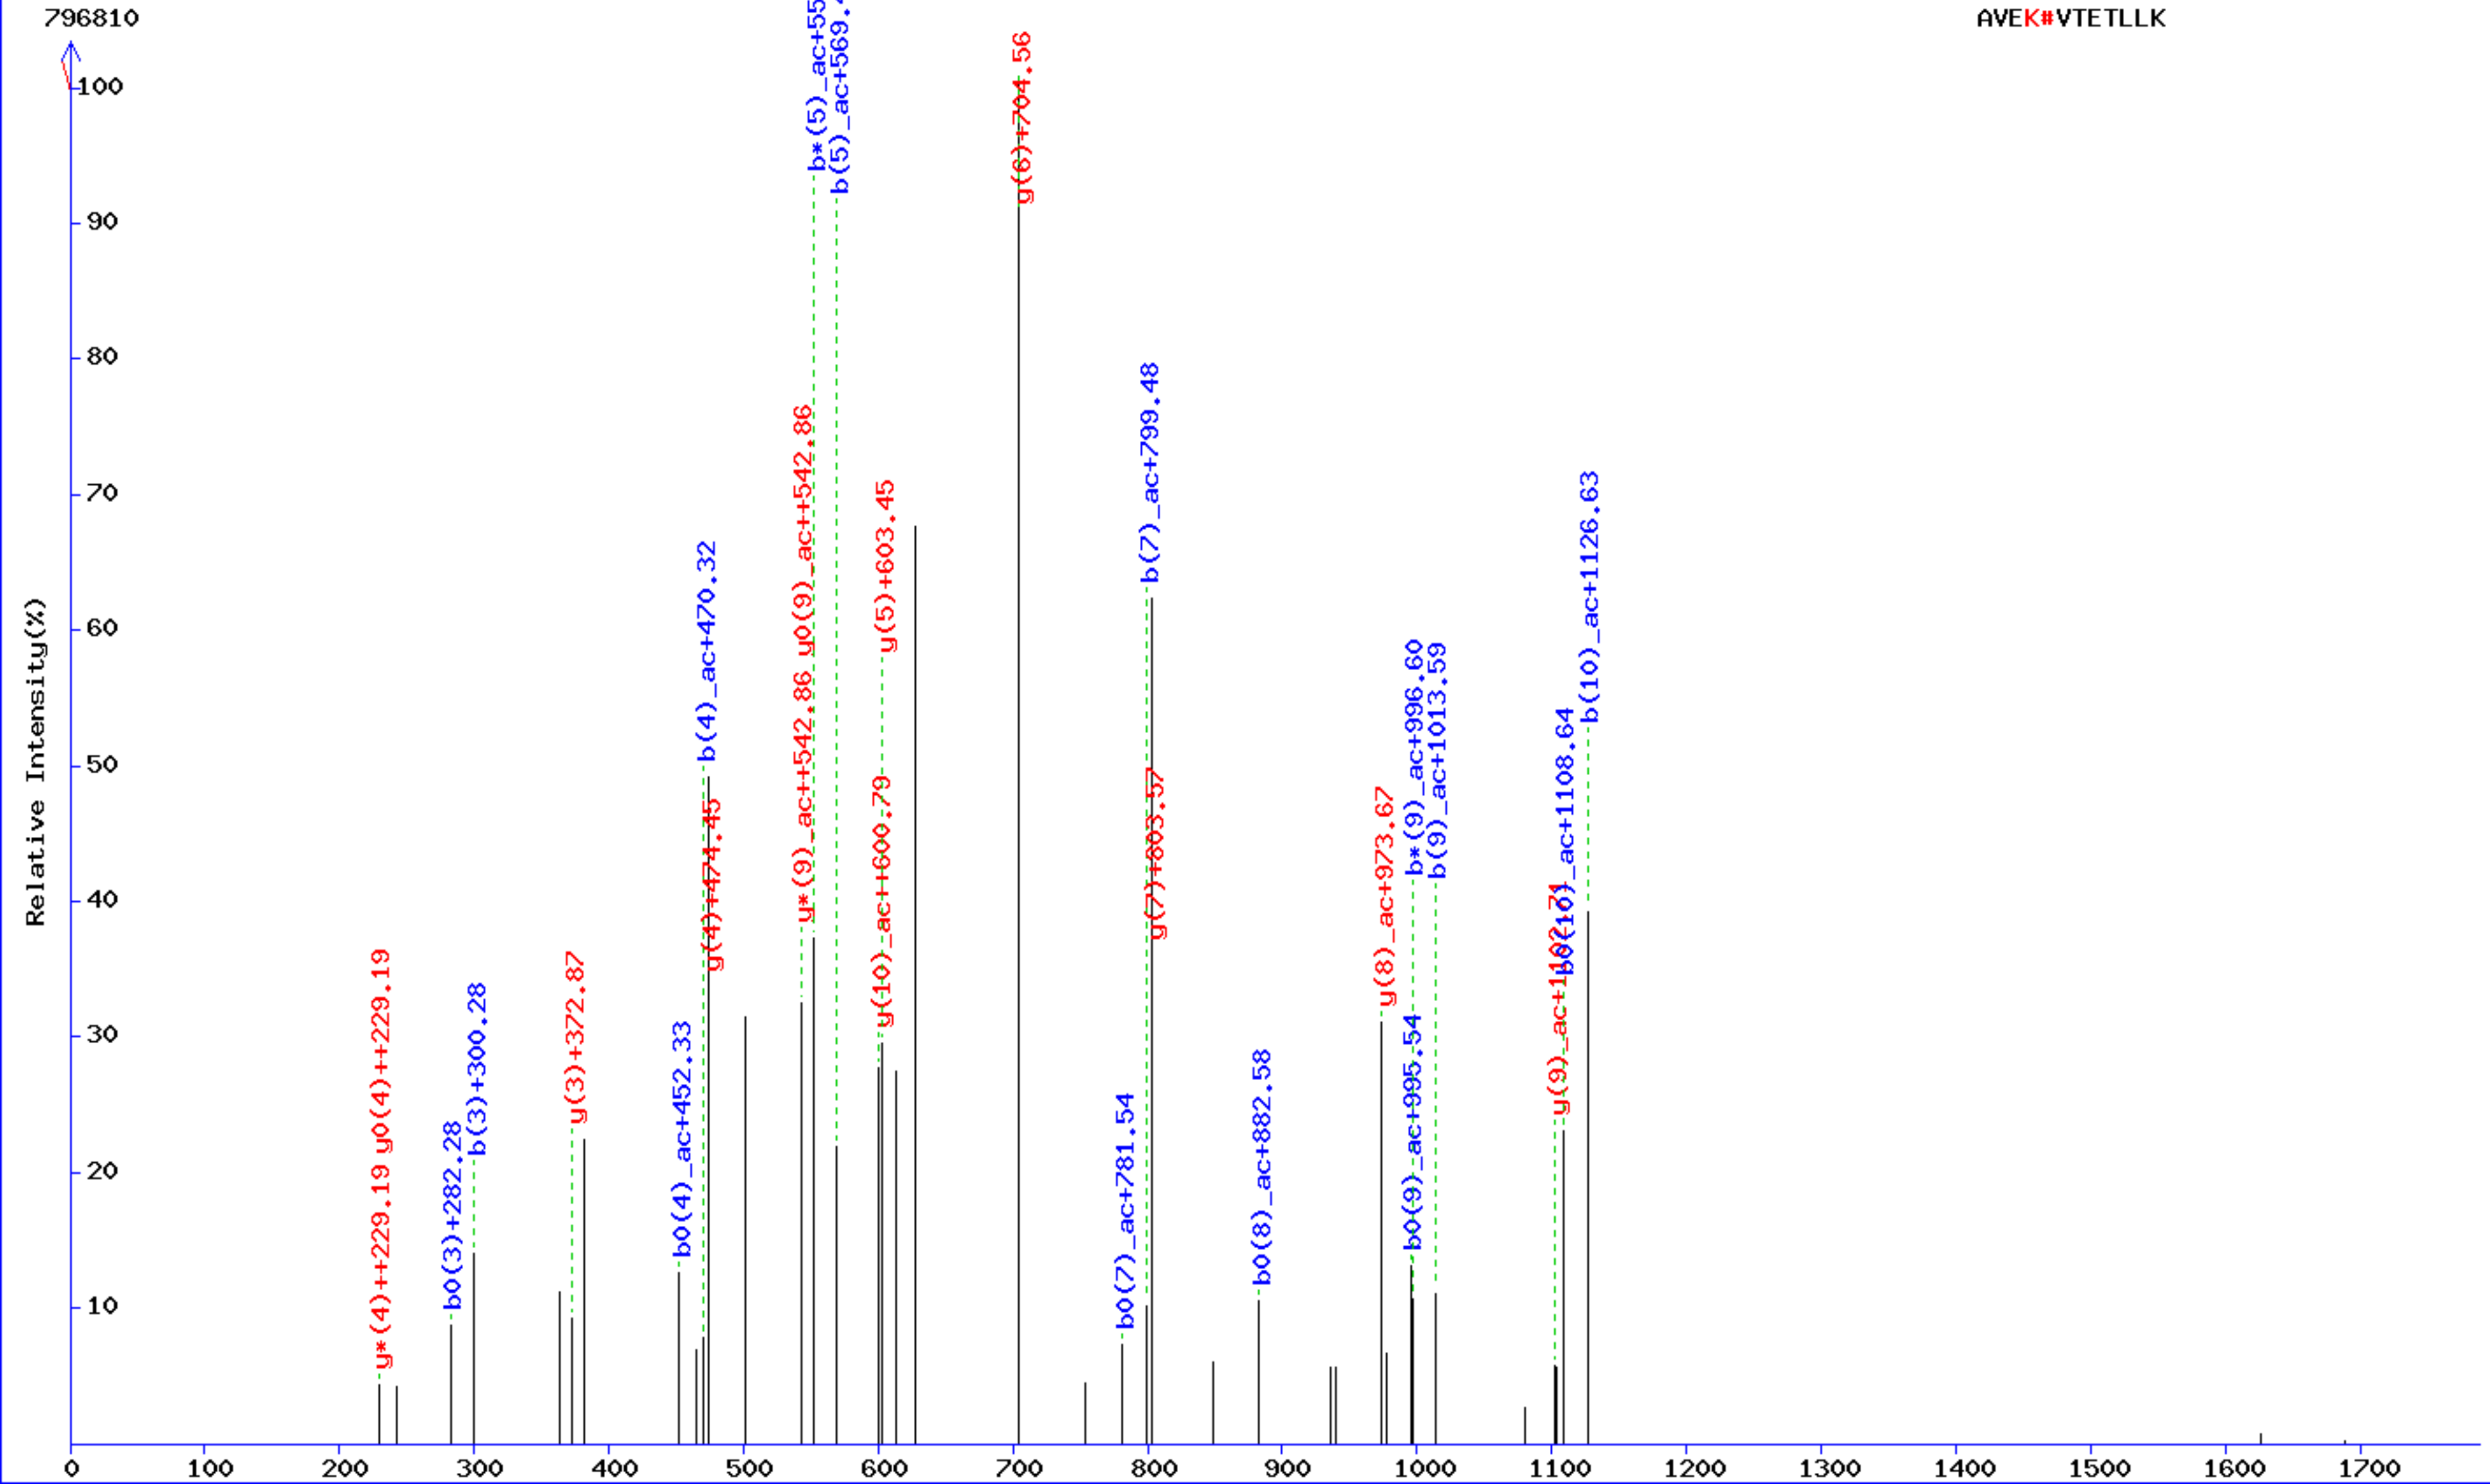

# gi|148661425 MRA\_1640 30S ribosomal protein S1

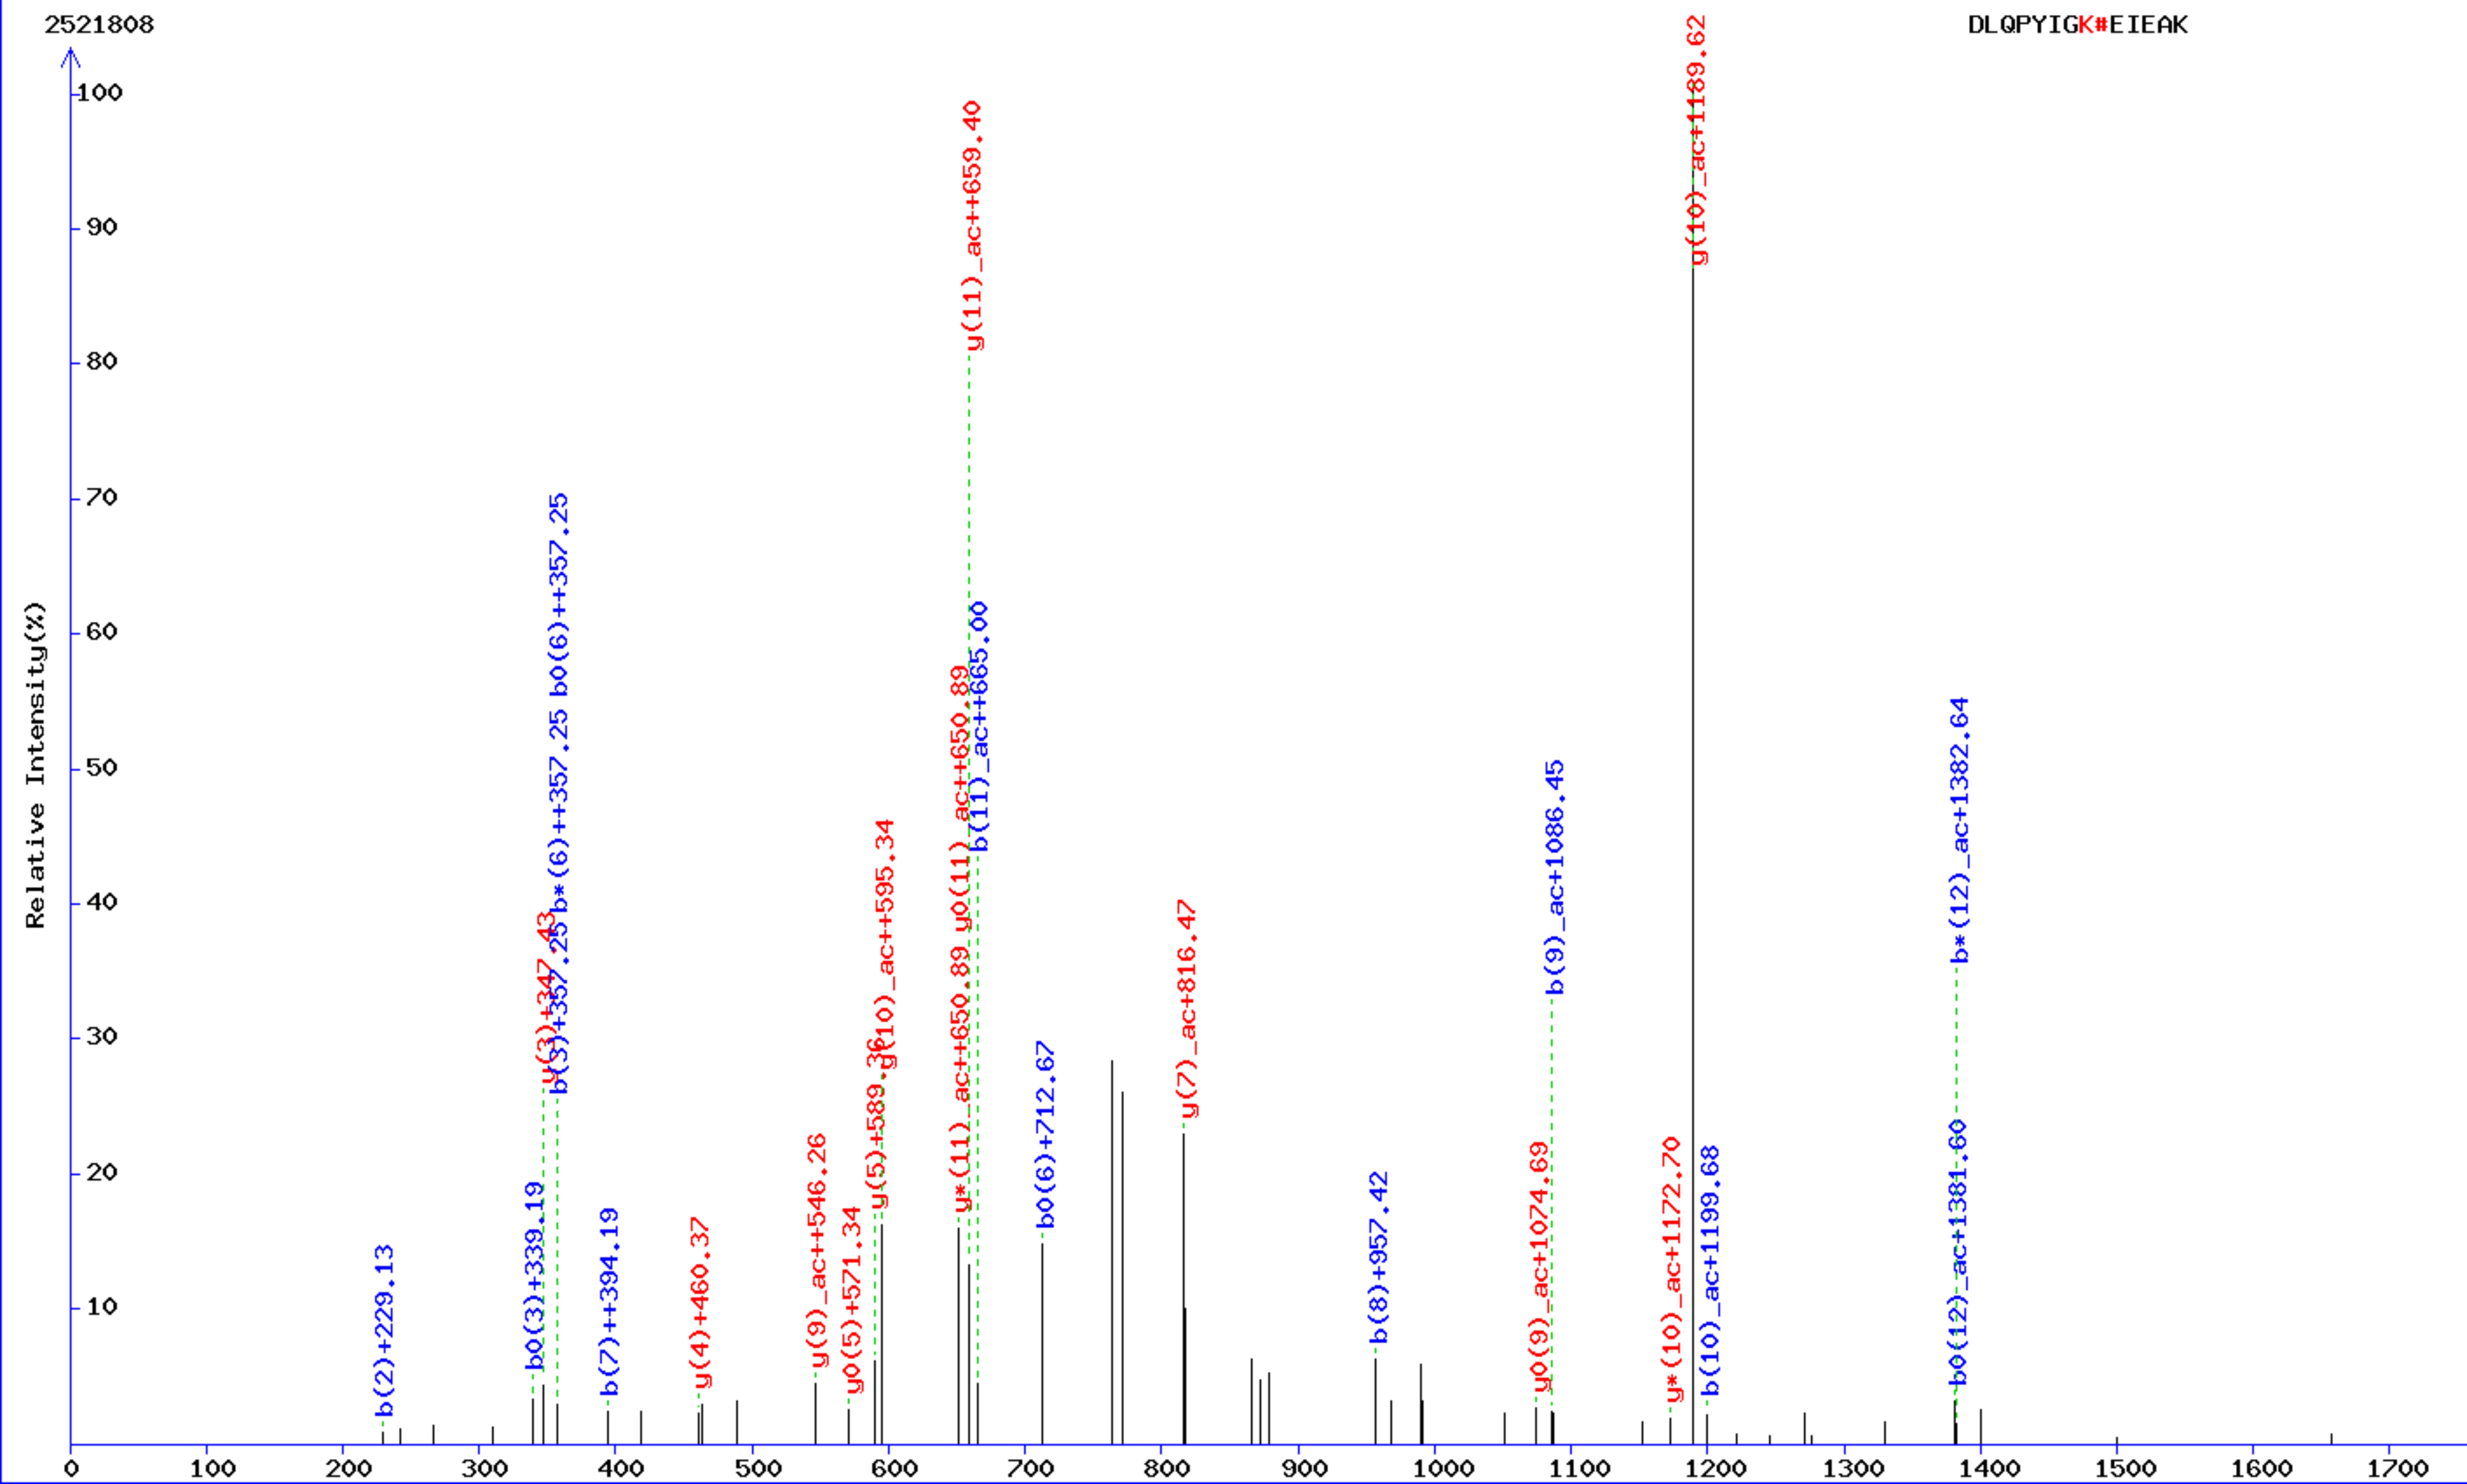

gi|148662753 MRA\_2934 30S ribosomal protein S16

LEVFNAALAAADGGPTTEATK#PK

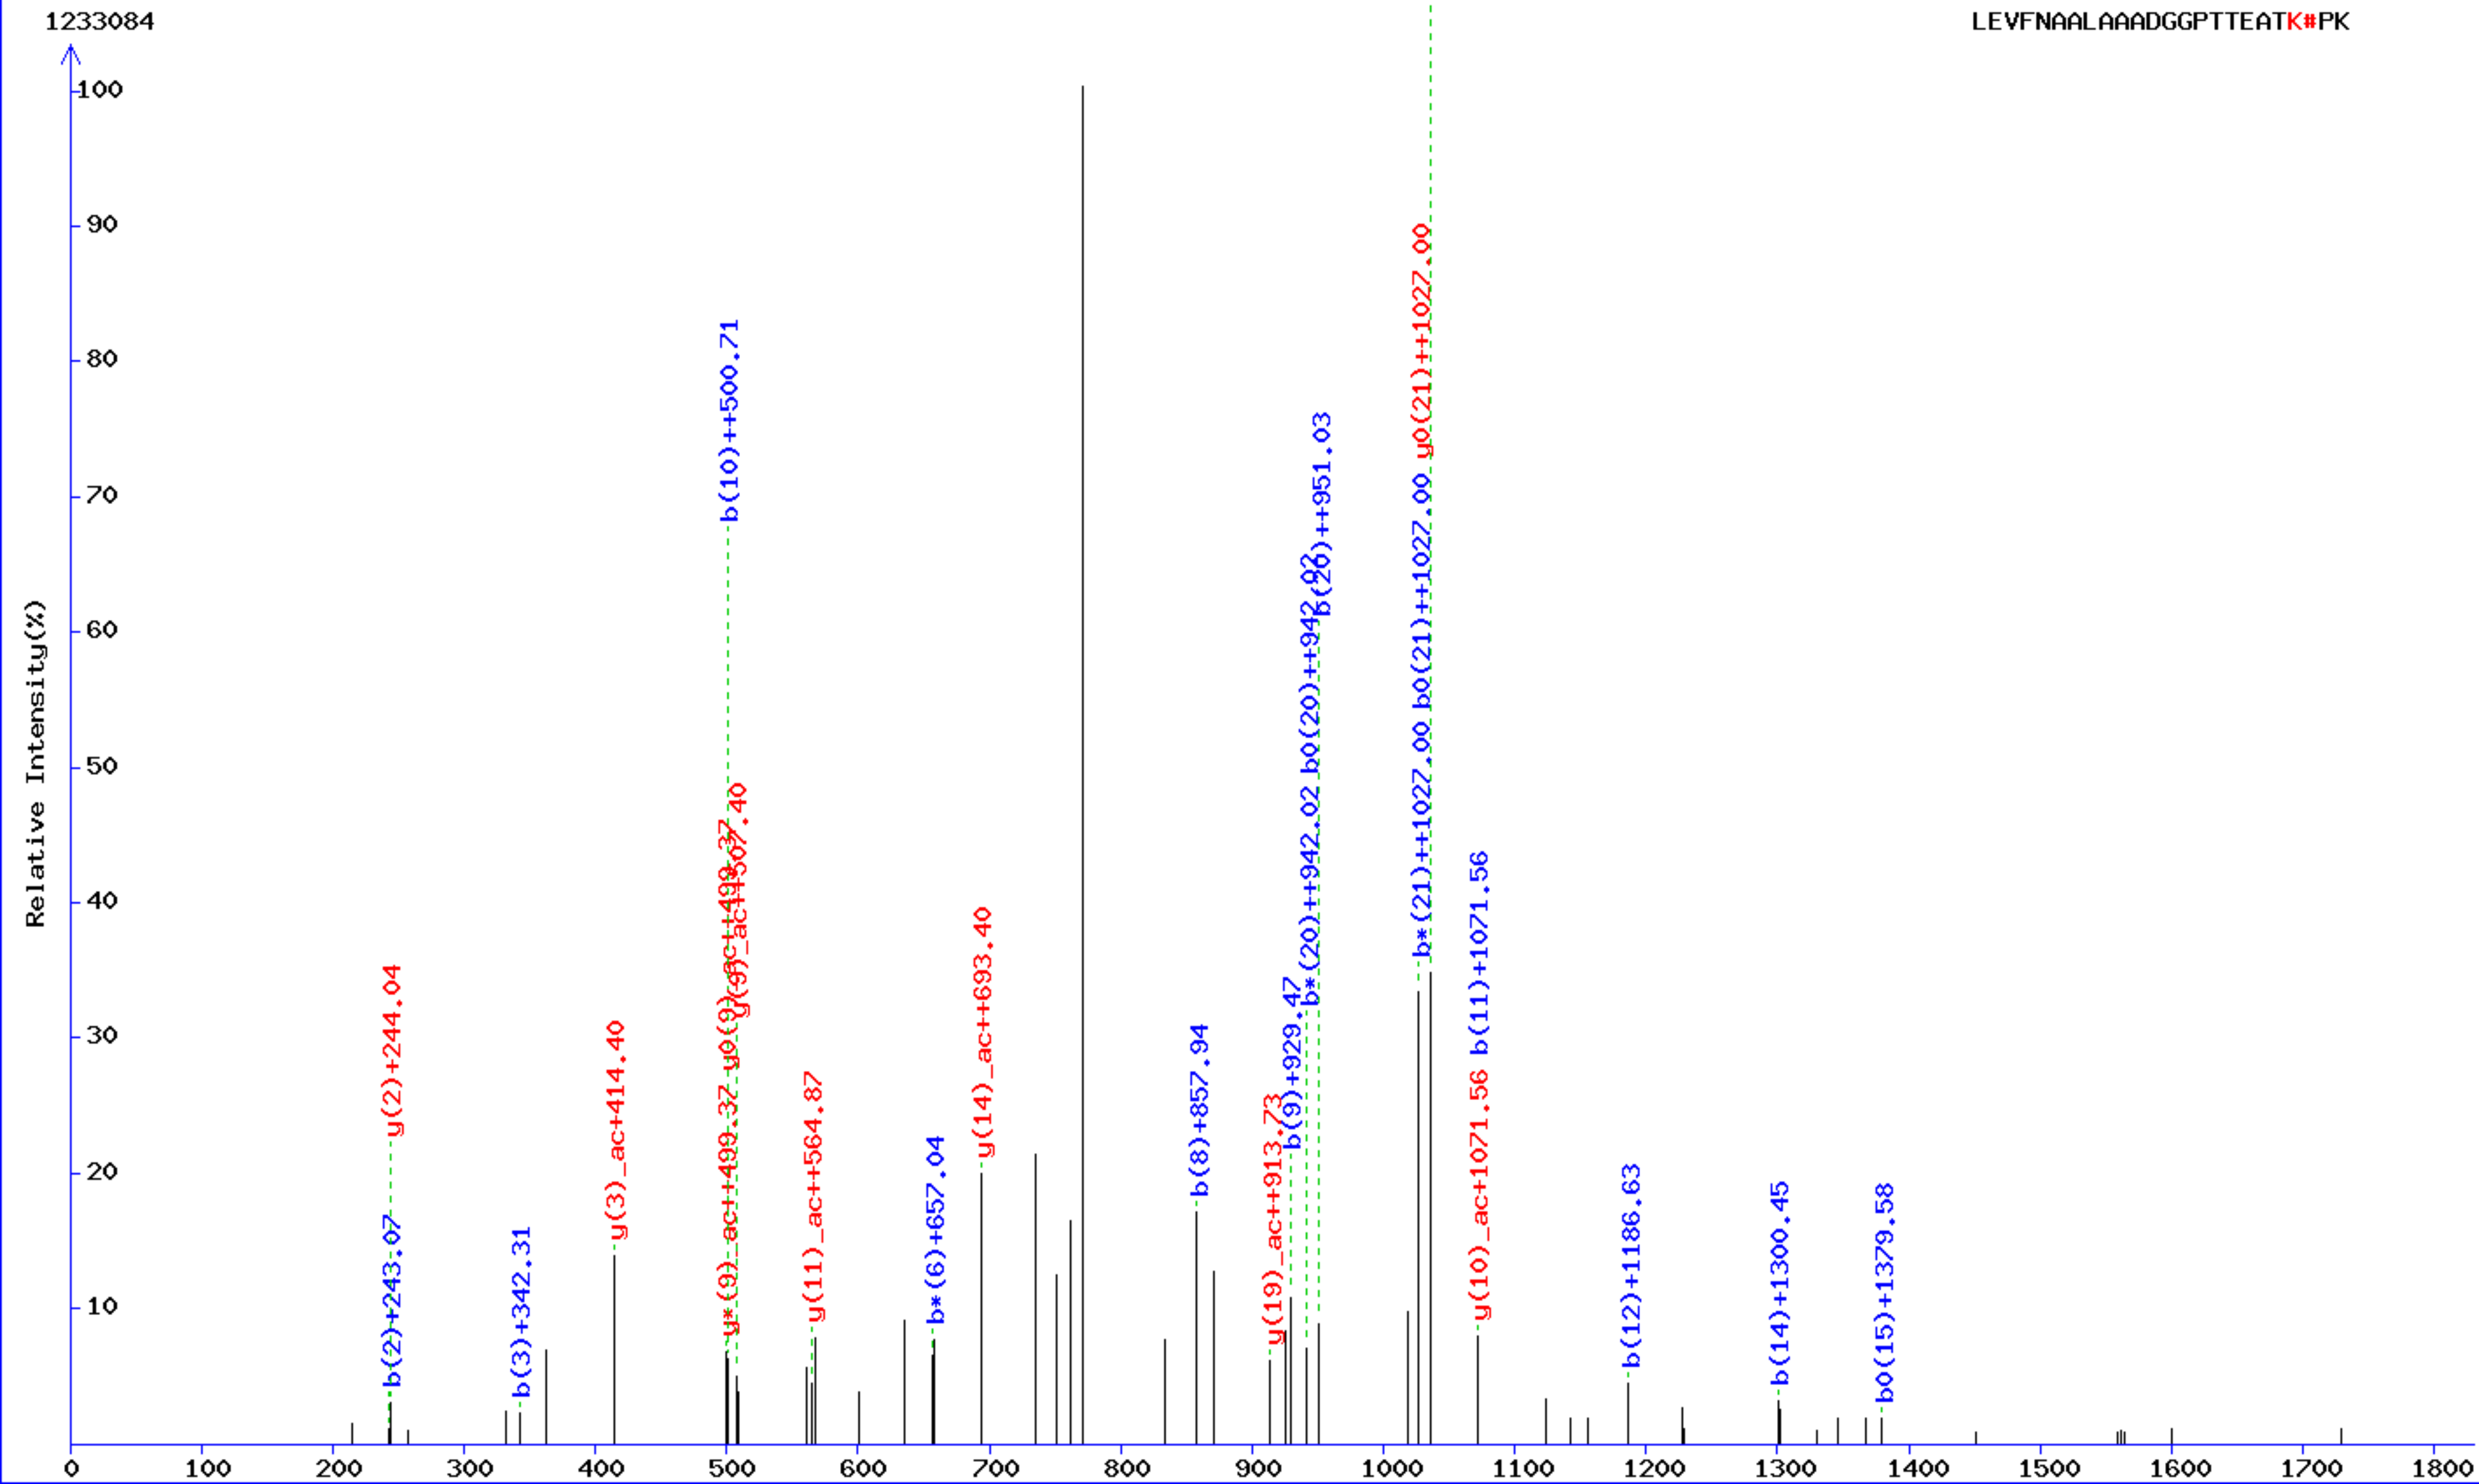

# gi|148660256 MRA\_0496 phosphoglyceromutase

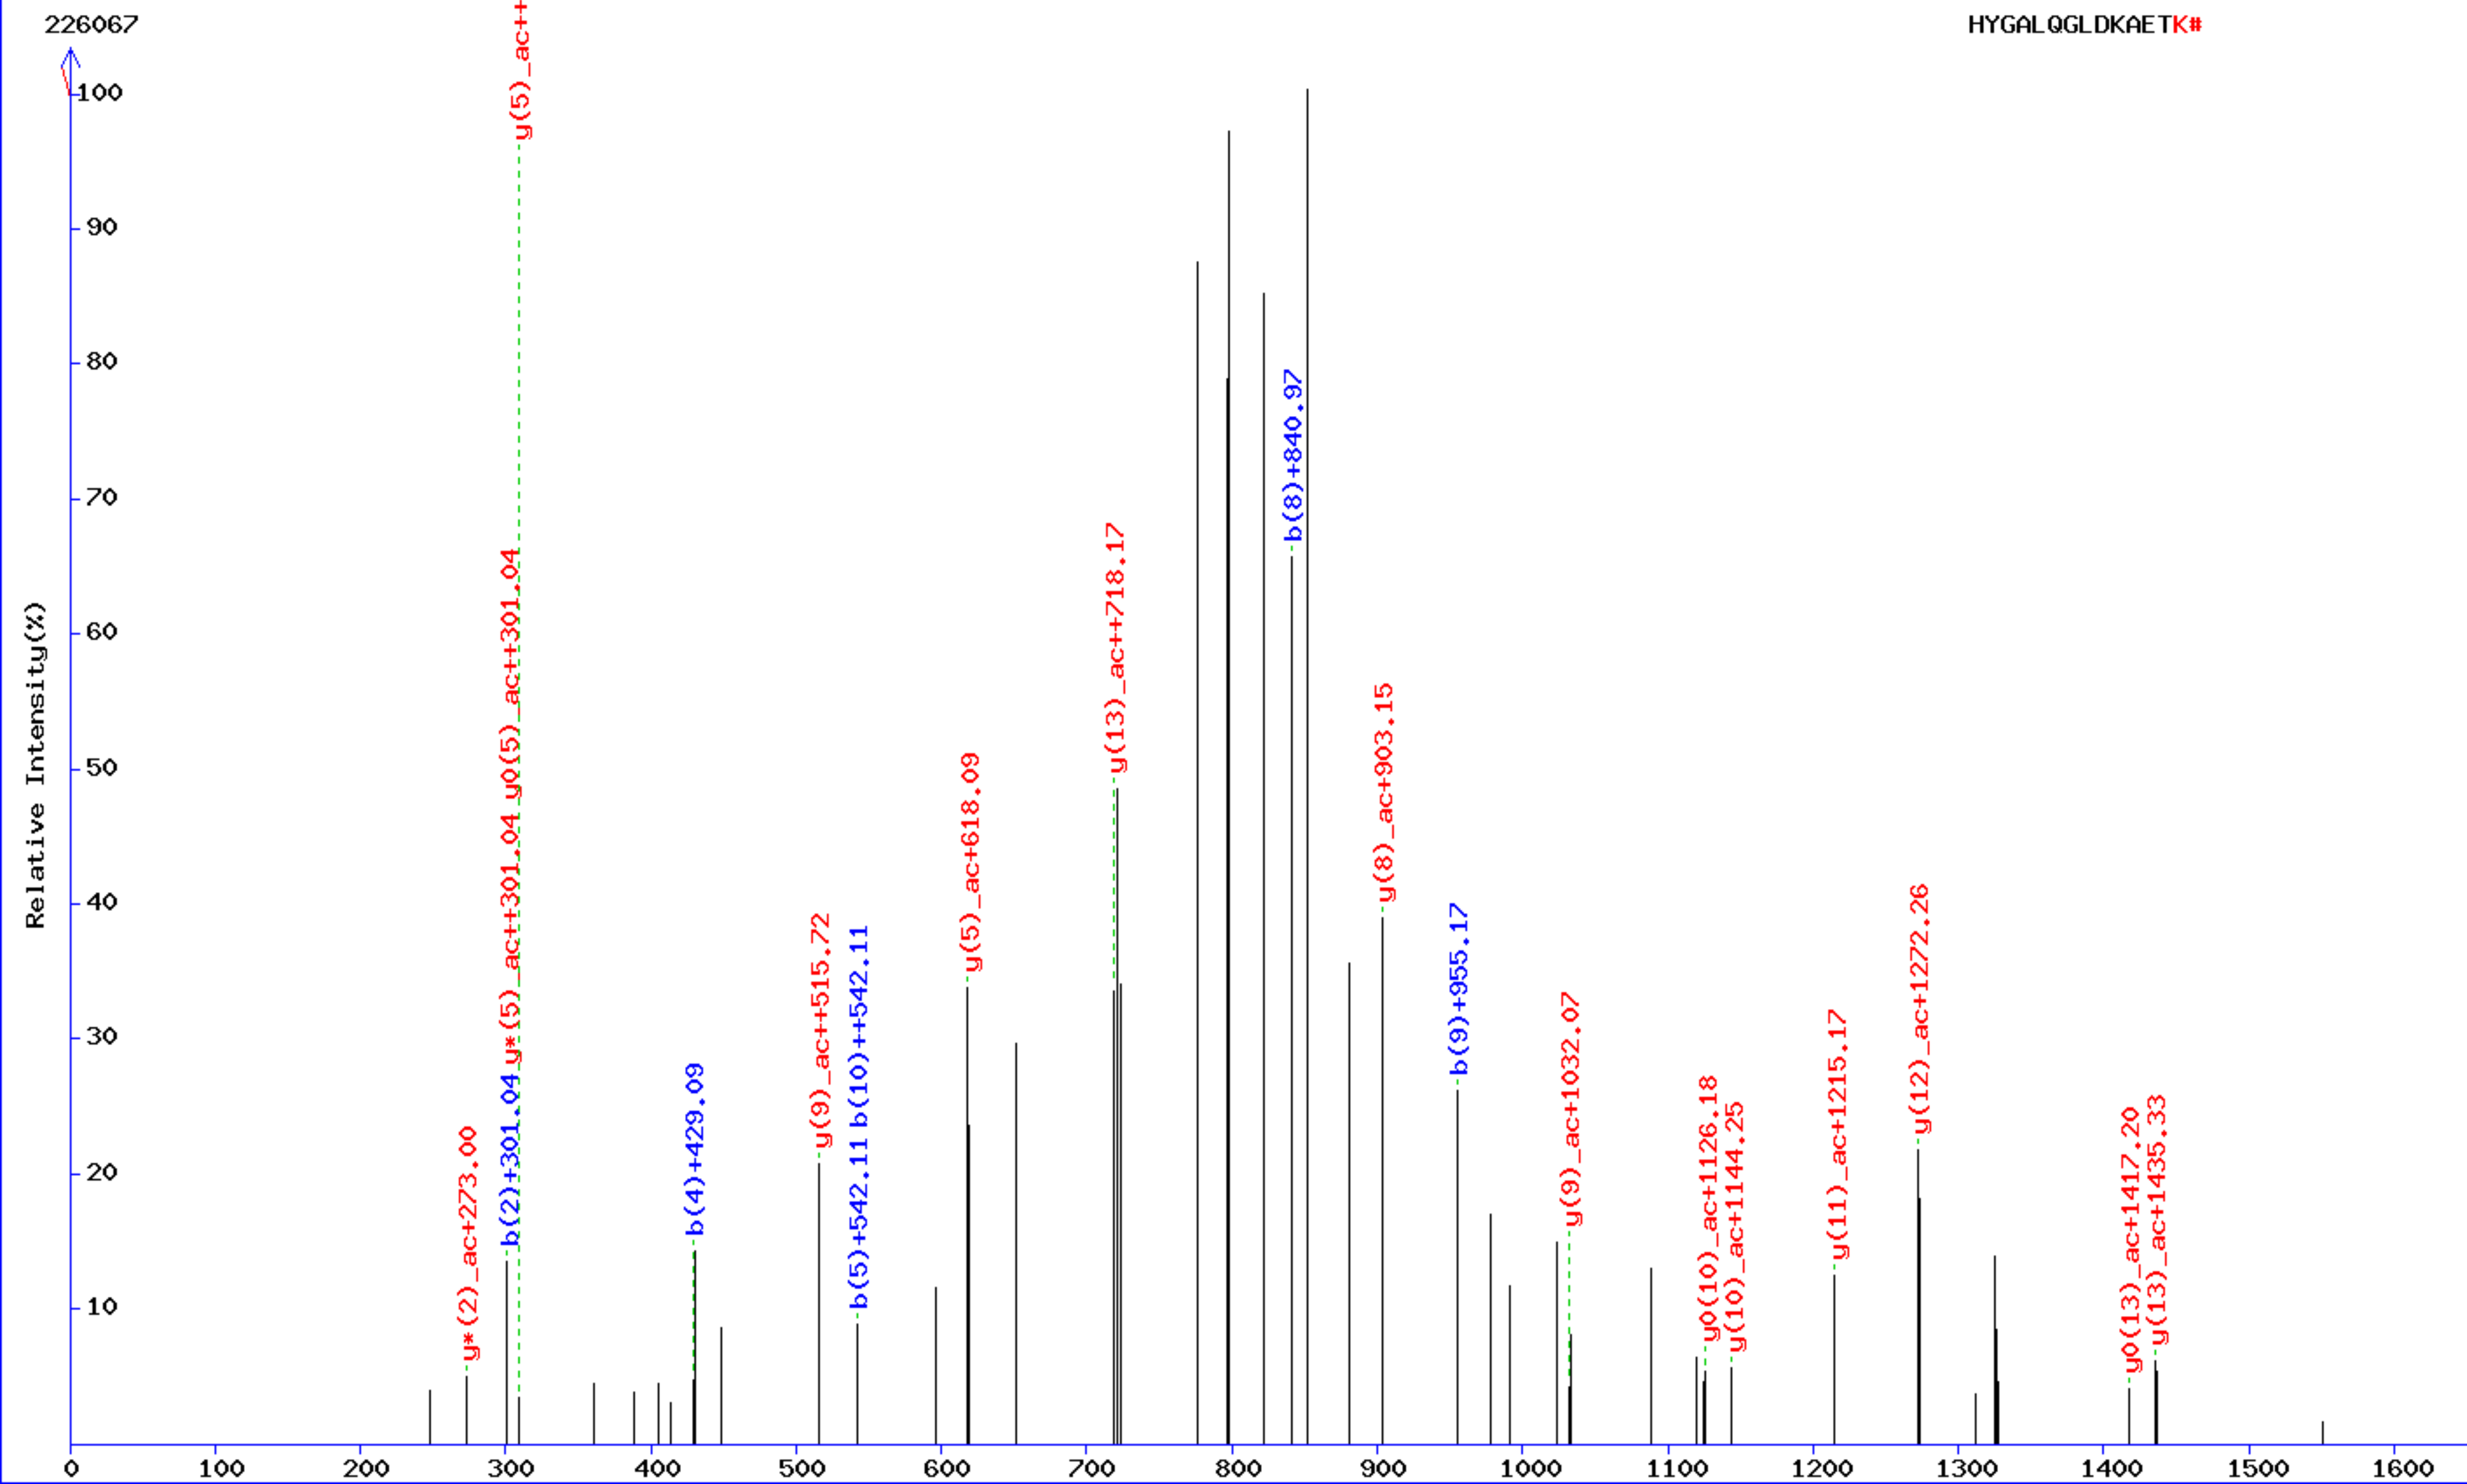

HYGALQGLDKAETK#



# gi|148660988 MRA\_1210 tetrahydrodipicolinate N-succinyltransferase

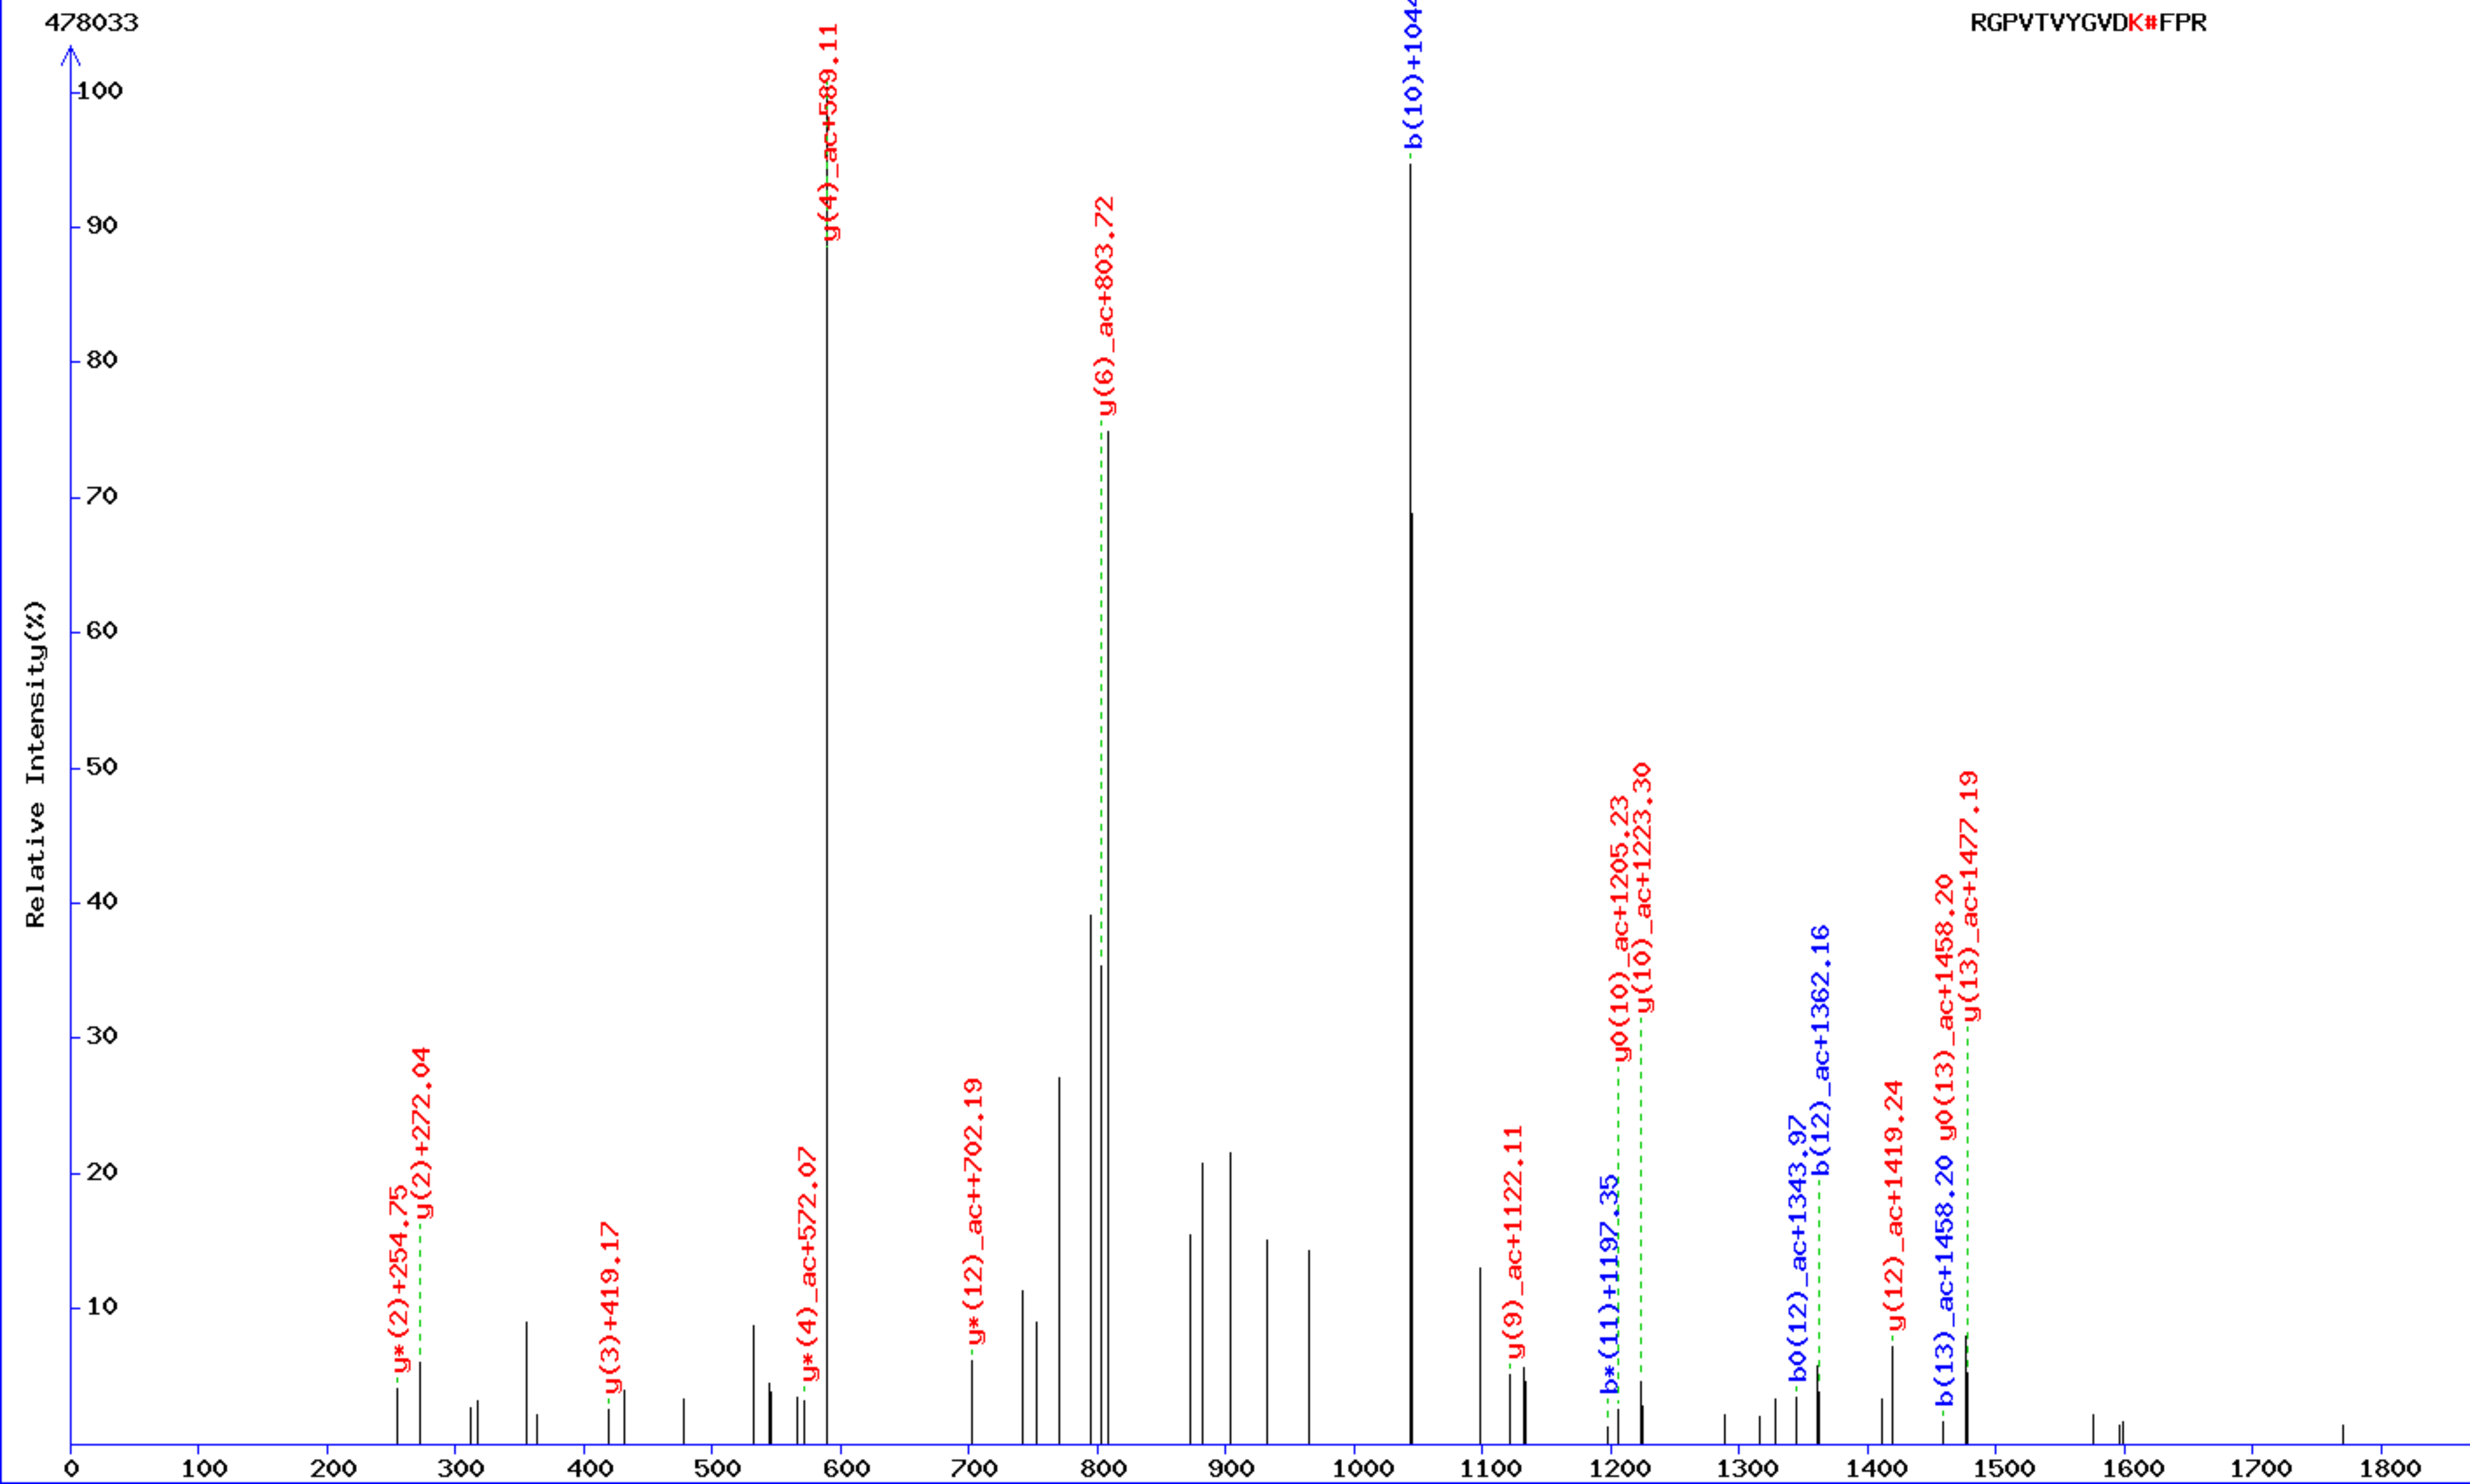

# gi|148660988 MRA\_1210 tetrahydrodipicolinate N-succinyltransferase

GPVTVYGVDK#FPR

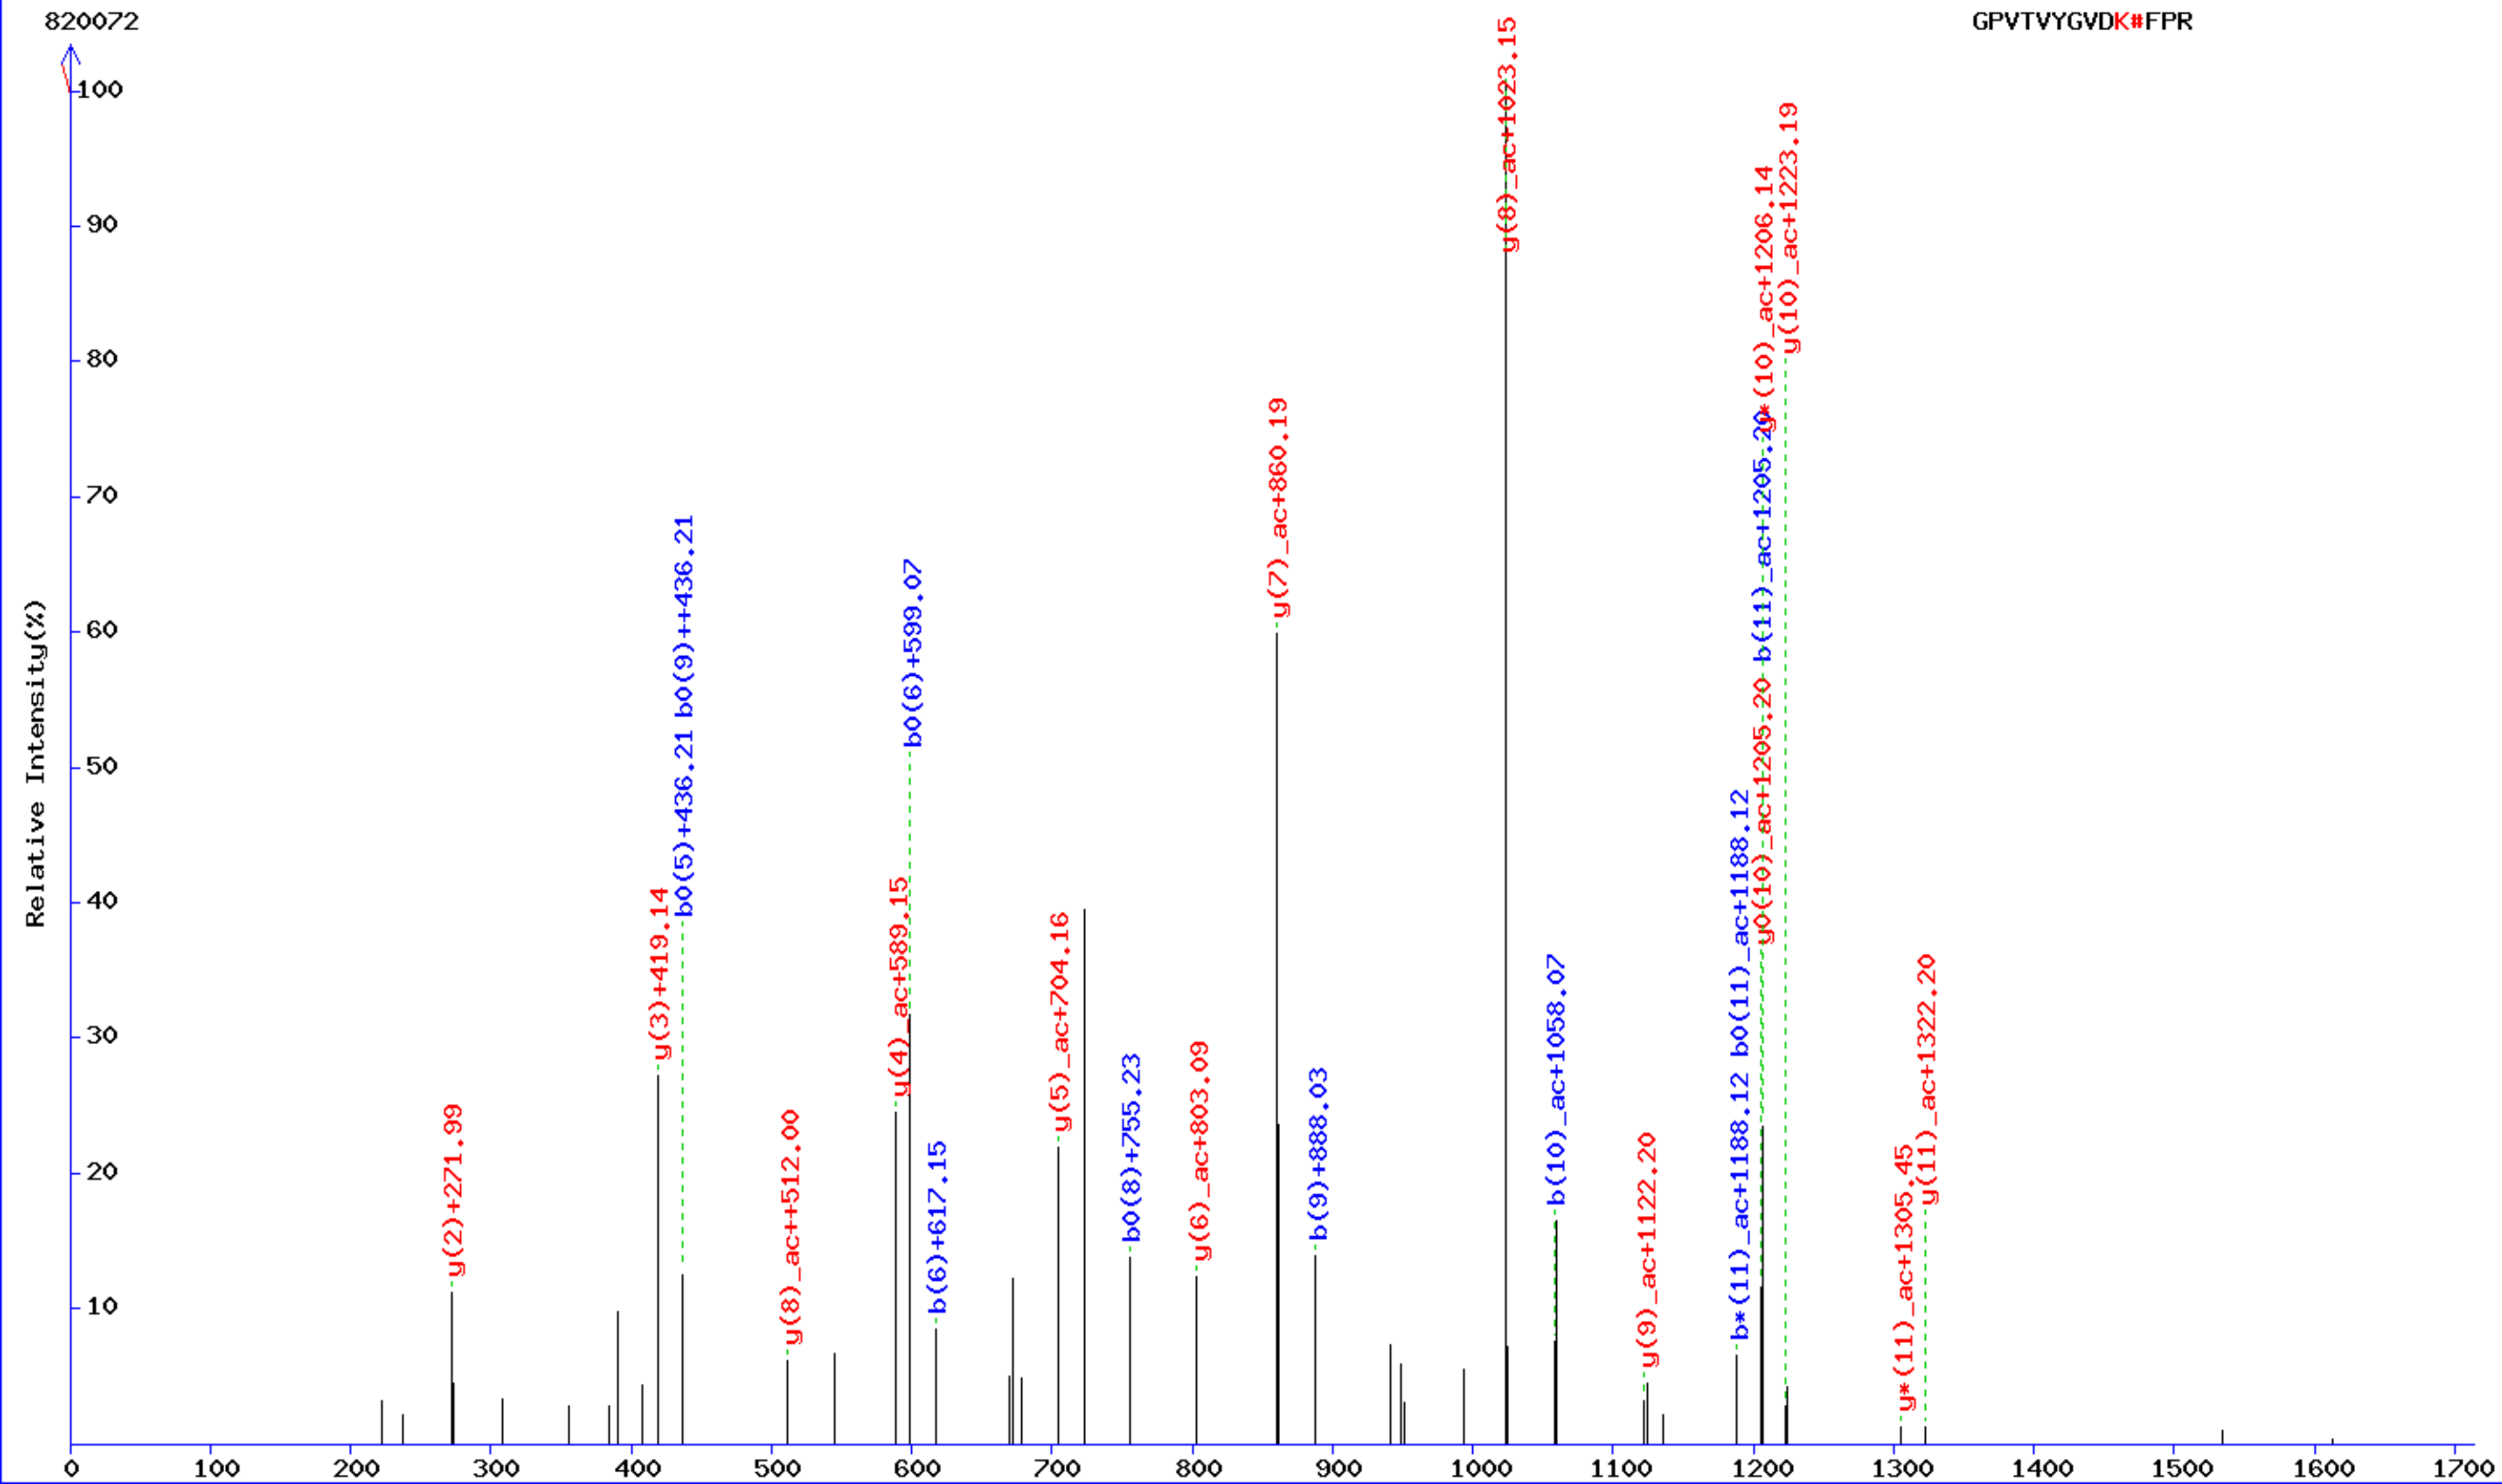

Supplement: supp_M114.041962_mcp.M114.041962-1.pdf [file supp_M114.041962_mcp.M114.041962-1.pdf]
