# Supplementary material
Source: PubMed Central journal article supplement (PMC4256489)

**Figure S2.** Growth curves of *M. tuberculosis* H37Ra and the  $\Delta MRA_{1161}$  mutant. (A) Bacterial cells were grown in 7H9 liquid medium (10% OADC + 0.5% glucose + 0.05% Tween 80). (B-E) Growth of *M. tuberculosis* H37Ra on acetate as carbon source. *M. tuberculosis* H37R and  $\Delta MRA_{1161}$  mutant strains were grown in 7H9 + 0.5% albumin, 0.085% NaCl, 0.05% Tween 80 and different concentrations of acetate (B: 5 mM, C: 10 mM, D: 30 mM, E: 50 mM).

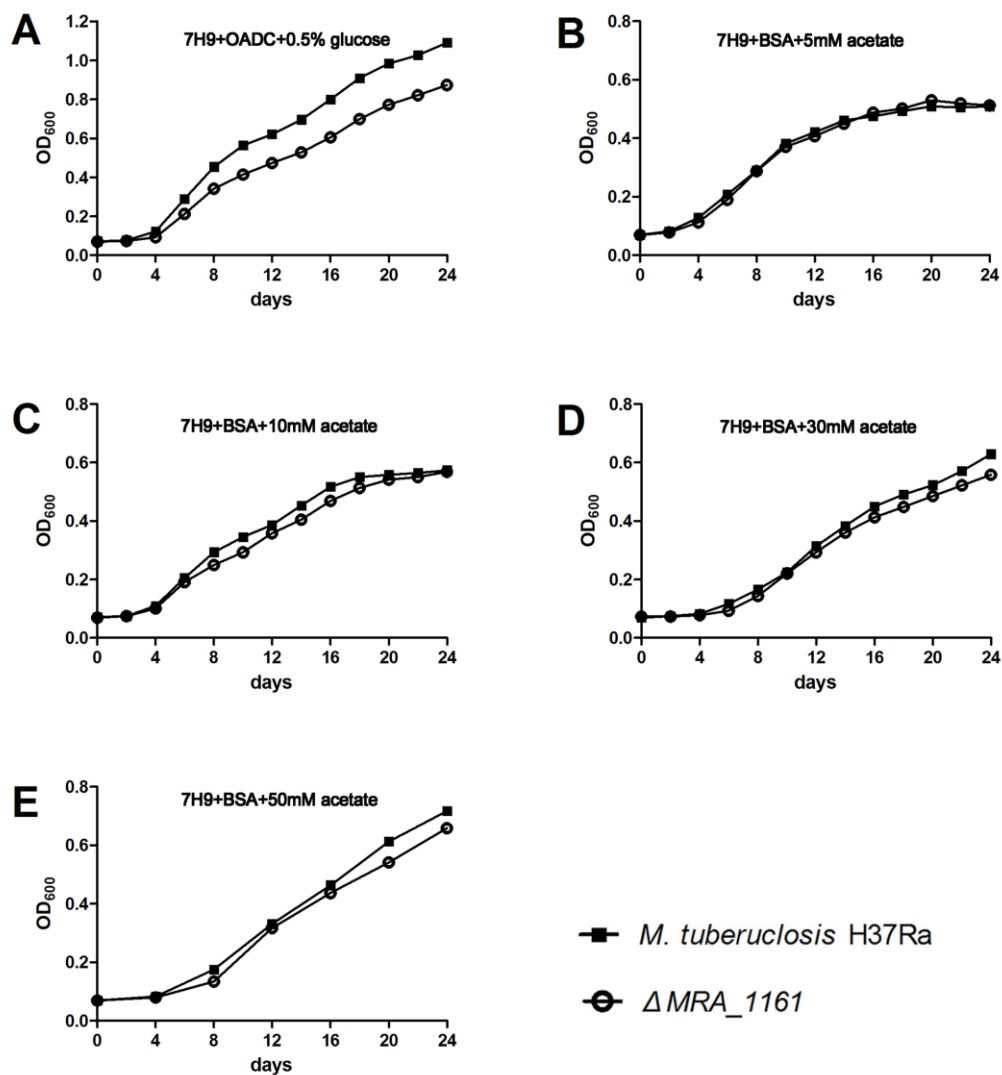

Supplement: supp_M114.041962_mcp.M114.041962-2.pdf [file supp_M114.041962_mcp.M114.041962-2.pdf]
