# Supplementary material
Source: PubMed Central journal article supplement (PMC4256489)
Supplement: supp_M114.041962_mcp.M114.041962-4.pdf [file supp_M114.041962_mcp.M114.041962-4.pdf]

**Supplementary Table S2. The list of all identified acetylated peptides**

| Proteins_ID  | Synonym         | Description                                           | Sequence                       | Search Engine | Peptide_Mod     | Protein_Mod      | ionscore   | PTM_Score | P                                    | Calc_mr    | Delta_mr | Charge | file_name                            |
|--------------|-----------------|-------------------------------------------------------|--------------------------------|---------------|-----------------|------------------|------------|-----------|--------------------------------------|------------|----------|--------|--------------------------------------|
| gijl48659759 | MRA_0002        | DNA polymerase III subunit beta                       | LLDAEFPK#FR                    | mascot        | 8,K(Acetyl_K);  | 260,K(Acetyl_K); | 28.75      | 101.82    | 1.00                                 | 1276.68155 | -0.0961  | 2      | Cmpd 1604913, +MSn(639.3), 47.9 min  |
|              |                 |                                                       |                                | pFind         | 8,K(Acetyl_K);  | 260,K(Acetyl_K); | 1.71E-17   | 101.82    | 1.00                                 | 1276.68157 | -0.09613 | 2      | Cmpd 1604913, +MSn(639.3), 47.9 min  |
| gijl48659826 | MRA_0068        | isocitrate dehydrogenase (NADP) Icd2                  | ATMMK#VSHPIVFGHAVR             | mascot        | 5,K(Acetyl_K);  | 262,K(Acetyl_K); | 46.84      | 89.76     | 1.00                                 | 1922.00188 | -0.04371 | 3      | Cmpd 2704063, +MSn(641.7), 48.3 min  |
|              |                 |                                                       |                                | pFind         | 5,K(Acetyl_K);  | 262,K(Acetyl_K); | 5.23E-13   | 89.76     | 1.00                                 | 1922.00188 | -0.04371 | 3      | Cmpd 2704063, +MSn(641.7), 48.3 min  |
|              |                 |                                                       |                                | pFind         | 5,K(Acetyl_K);  | 213,K(Acetyl_K); | 0.00000481 | 149.82    | 1.00                                 | 2590.29103 | -0.38286 | 3      | Cmpd 2307134, +MSn(864.3), 71.6 min  |
|              |                 |                                                       |                                | mascot        | 5,K(Acetyl_K);  | 122,K(Acetyl_K); | 36.09      | 148.68    | 1.00                                 | 973.507996 | 0.217452 | 2      | Cmpd 1402884, +MSn(487.9), 31.9 min  |
|              |                 |                                                       |                                | pFind         | 5,K(Acetyl_K);  | 122,K(Acetyl_K); | 4.49E-09   | 148.68    | 1.00                                 | 973.508034 | 0.21741  | 2      | Cmpd 1402884, +MSn(487.9), 31.9 min  |
|              |                 |                                                       |                                | pFind         | 3,K(Acetyl_K);  | 734,K(Acetyl_K); | 4.66E-15   | 206.58    | 1.00                                 | 1473.74636 | -0.02092 | 2      | Cmpd 1706547, +MSn(737.9), 68.9 min  |
| gijl48659912 | MRA_0155        | short-chain type dehydrogenase/reductase              | VALFGNDGANFDK#PPSVQDVAAR       | mascot        | 13,K(Acetyl_K); | 259,K(Acetyl_K); | 57.69      | 213.46    | 1.00                                 | 2429.19754 | -0.17937 | 3      | Cmpd 1806882, +MSn(810.7), 72.4 min  |
|              |                 |                                                       |                                | pFind         | 13,K(Acetyl_K); | 259,K(Acetyl_K); | 8.38E-15   | 213.46    | 1.00                                 | 2429.19754 | -0.17937 | 3      | Cmpd 1806882, +MSn(810.7), 72.4 min  |
| gijl48659921 | MRA_0165        | NAD(P) transhydrogenase subunit beta                  | SIPAIVAGGFGGGVAPSGGGDDK#HVK    | mascot        | 24,K(Acetyl_K); | 299,K(Acetyl_K); | 36.75      | 142.08    | 1.00                                 | 2448.23978 | -0.17161 | 3      | Cmpd 1504396, +MSn(817.0), 51.2 min  |
|              |                 |                                                       |                                | pFind         | 24,K(Acetyl_K); | 299,K(Acetyl_K); | 8.88E-07   | 142.08    | 1.00                                 | 2448.23974 | -0.17157 | 3      | Cmpd 1504396, +MSn(817.0), 51.2 min  |
| gijl48659975 | MRA_0219        | phosphoenolpyruvate carboxykinase                     | LPK#VFFVNWFR                   | mascot        | 3,K(Acetyl_K);  | 495,K(Acetyl_K); | 54.01      | 114.67    | 1.00                                 | 1493.81834 | 0.127104 | 2      | Cmpd 608943, +MSn(748.0), 106.3 min  |
|              |                 |                                                       |                                | pFind         | 3,K(Acetyl_K);  | 495,K(Acetyl_K); | 2.29E-23   | 114.67    | 1.00                                 | 1493.81834 | 0.1271   | 2      | Cmpd 608943, +MSn(748.0), 106.3 min  |
| gijl48659995 | MRA_0239        | acyl-CoA dehydrogenase                                | GVEK#DTFFETVAR                 | mascot        | 4,K(Acetyl_K);  | 355,K(Acetyl_K); | 40.08      | 106.41    | 1.00                                 | 1539.75693 | 0.128521 | 2      | Cmpd 706798, +MSn(770.9), 79.8 min   |
|              |                 |                                                       |                                | pFind         | 4,K(Acetyl_K);  | 355,K(Acetyl_K); | 6.77E-11   | 106.41    | 1.00                                 | 1539.75693 | 0.12851  | 2      | Cmpd 706798, +MSn(770.9), 79.8 min   |
| gijl48660007 | MRA_0251        | 3-ketoacyl-ACP reductase                              | AALEK#DYDLVGNLGGRR             | mascot        | 5,K(Acetyl_K);  | 66,K(Acetyl_K);  | 81.78      | 200.19    | 1.00                                 | 1845.92206 | -0.13661 | 2      | Cmpd 3204442, +MSn(923.9), 52.1 min  |
|              |                 |                                                       |                                | pFind         | 5,K(Acetyl_K);  | 66,K(Acetyl_K);  | 4.51E-19   | 200.19    | 1.00                                 | 1845.92208 | -0.13664 | 2      | Cmpd 3204442, +MSn(923.9), 52.1 min  |
| gijl48660009 | MRA_0253        | acyl-CoA dehydrogenase                                | NPPVFDPK#THSVMLEPESFK          | pFind         | 8,K(Acetyl_K);  | 70,K(Acetyl_K);  | 1.84E-07   | 166.42    | 1.00                                 | 2211.10343 | -0.03526 | 3      | Cmpd 1706883, +MSn(738.0), 72.3 min  |
|              |                 |                                                       |                                | pFind         | 3,K(Acetyl_K);  | 79,K(Acetyl_K);  | 8.37E-12   | 81.63     | 1.00                                 | 1132.57778 | 0.06766  | 2      | Cmpd 706798, +MSn(567.3), 62.2 min   |
| gijl48660013 | MRA_0257        | succinate dehydrogenase flavoprotein subunit          | GGK#FLNNWR                     | pFind         | 3,K(Acetyl_K);  | 79,K(Acetyl_K);  | 8.37E-12   | 81.63     | 1.00                                 | 1132.57778 | 0.06766  | 2      | Cmpd 706798, +MSn(567.3), 62.2 min   |
|              |                 |                                                       |                                | pFind         | 7,K(Acetyl_K);  | 327,K(Acetyl_K); | 51.2       | 178.96    | 1.00                                 | 2095.14121 | -0.05576 | 2      | Cmpd 1504335, +MSn(1048.6), 50.6 min |
| gijl48660035 | MRA_0278        | acyl-CoA synthetase                                   | ILDQLEK#TEPKDLSLKL             | pFind         | 7,K(Acetyl_K);  | 327,K(Acetyl_K); | 1.53E-10   | 218.16    | 1.00                                 | 2095.14125 | -0.11581 | 2      | Cmpd 1706104, +MSn(1048.5), 64.4 min |
|              |                 |                                                       |                                | pFind         | 10,K(Acetyl_K); | 170,K(Acetyl_K); | 1.48E-07   | 150.89    | 1.00                                 | 2361.24676 | -0.26859 | 3      | Cmpd 1605704, +MSn(788.0), 55.5 min  |
|              |                 |                                                       |                                | mascot        | 10,K(Acetyl_K); | 170,K(Acetyl_K); | 26.22      | 150.89    | 1.00                                 | 2361.24675 | -0.26858 | 3      | Cmpd 1605704, +MSn(788.0), 55.5 min  |
|              |                 |                                                       |                                | mascot        | 5,K(Acetyl_K);  | 551,K(Acetyl_K); | 62.03      | 168.67    | 1.00                                 | 1053.62946 | 0.075992 | 2      | Cmpd 2202016, +MSn(527.9), 23.6 min  |
|              |                 |                                                       |                                | pFind         | 5,K(Acetyl_K);  | 551,K(Acetyl_K); | 1.08E-11   | 168.67    | 1.00                                 | 1053.62948 | 0.07596  | 2      | Cmpd 2202016, +MSn(527.9), 23.6 min  |
|              |                 |                                                       |                                | pFind         | 4,K(Acetyl_K);  | 695,K(Acetyl_K); | 53.79      | 134.56    | 1.00                                 | 1530.81943 | -0.03398 | 2      | Cmpd 2805417, +MSn(766.4), 63.7 min  |
| gijl48660036 | MRA_0279        | acyl-CoA dehydrogenase                                | LPGK#WGEYLLASR                 | mascot        | 4,K(Acetyl_K);  | 695,K(Acetyl_K); | 53.79      | 134.56    | 1.00                                 | 1530.81943 | -0.03398 | 2      | Cmpd 2805417, +MSn(766.4), 63.7 min  |
|              |                 |                                                       |                                | pFind         | 4,K(Acetyl_K);  | 695,K(Acetyl_K); | 7.03E-15   | 134.56    | 1.00                                 | 1530.81946 | -0.03402 | 2      | Cmpd 2805417, +MSn(766.4), 63.7 min  |
| gijl48660104 | MRA_0347        | iron-sulfur-binding reductase                         | AAPTAPAAPAAPVKGLGIAAGAK#RPGAK# | mascot        | 30,K(Acetyl_K); | 822,K(Acetyl_K); | 33.57      | 171.02    | 0.50                                 | 2689.53909 | -0.06092 | 3      | Cmpd 1403230, +MSn(897.5), 37.7 min  |
|              |                 |                                                       |                                | pFind         | 25,K(Acetyl_K); | 817,K(Acetyl_K); |            |           | 0.50                                 |            |          |        |                                      |
| gijl48660116 | MRA_0359        | molecular chaperone DnaK                              | NQAETLVYQTEK#FVK               | mascot        | 12,K(Acetyl_K); | 522,K(Acetyl_K); | 71.08      | 250.18    | 1.00                                 | 1838.94141 | -0.13596 | 2      | Cmpd 1505290, +MSn(920.4), 61.3 min  |
|              |                 |                                                       |                                | pFind         | 12,K(Acetyl_K); | 522,K(Acetyl_K); | 8.83E-20   | 250.18    | 1.00                                 | 1838.94142 | -0.13598 | 2      | Cmpd 1505290, +MSn(920.4), 61.3 min  |
|              |                 |                                                       |                                | mascot        | 8,K(Acetyl_K);  | 215,K(Acetyl_K); | 86.3       | 130.07    | 1.00                                 | 1289.70198 | 0.003467 | 2      | Cmpd 3005812, +MSn(645.9), 67.7 min  |
|              |                 |                                                       |                                | pFind         | 8,K(Acetyl_K);  | 215,K(Acetyl_K); | 6.53E-24   | 130.07    | 1.00                                 | 1289.70198 | 0.00346  | 2      | Cmpd 3005812, +MSn(645.9), 67.7 min  |
|              |                 |                                                       |                                | mascot        | 13,K(Acetyl_K); | 84,K(Acetyl_K);  | 59.57      | 203.56    | 1.00                                 | 1643.76134 | -0.09589 | 2      | Cmpd 3004037, +MSn(822.8), 47.5 min  |
|              |                 |                                                       |                                | pFind         | 13,K(Acetyl_K); | 84,K(Acetyl_K);  | 3.84E-16   | 130.07    | 1.00                                 | 1643.76136 | -0.13592 | 2      | Cmpd 3004059, +MSn(822.8), 47.7 min  |
|              |                 |                                                       |                                | mascot        | 9,K(Acetyl_K);  | 483,K(Acetyl_K); | 87.16      | 182.22    | 1.00                                 | 1587.774   | -0.08855 | 2      | Cmpd 1402951, +MSn(794.8), 34.6 min  |
|              |                 |                                                       |                                | pFind         | 9,K(Acetyl_K);  | 483,K(Acetyl_K); | 6.1E-22    | 182.22    | 1.00                                 | 1587.77403 | -0.08859 | 2      | Cmpd 1402951, +MSn(794.8), 34.6 min  |
|              |                 |                                                       |                                | mascot        | 8,K(Acetyl_K);  | 543,K(Acetyl_K); | 93.2       | 202.26    | 1.00                                 | 1810.93123 | -0.08578 | 2      | Cmpd 1706530, +MSn(906.4), 68.7 min  |
|              |                 |                                                       |                                | pFind         | 8,K(Acetyl_K);  | 543,K(Acetyl_K); | 1.11E-21   | 202.26    | 1.00                                 | 1810.93126 | -0.08582 | 2      | Cmpd 1706530, +MSn(906.4), 68.7 min  |
| gijl48660118 | MRA_0361        | molecular chaperone DnaJ                              | GAPSGDLVYTVHVRPDK#IFGR         | mascot        | 17,K(Acetyl_K); | 287,K(Acetyl_K); | 30.6       | 170.45    | 1.00                                 | 2325.22298 | -0.18481 | 3      | Cmpd 3204870, +MSn(776.0), 56.9 min  |
|              |                 |                                                       |                                | pFind         | 17,K(Acetyl_K); | 287,K(Acetyl_K); | 0.000409   | 170.45    | 1.00                                 | 2325.22296 | -0.18479 | 3      | Cmpd 3204870, +MSn(776.0), 56.9 min  |
| gijl48660129 | MRA_0372        | fructose-bisphosphate aldolase                        | DK#LDSYVRLLAISAQR              | mascot        | 2,K(Acetyl_K);  | 101,K(Acetyl_K); | 53.21      | 164.13    | 1.00                                 | 1986.08978 | 0.008389 | 3      | Cmpd 3205928, +MSn(663.0), 68.9 min  |
|              |                 |                                                       |                                | pFind         | 2,K(Acetyl_K);  | 101,K(Acetyl_K); | 6.17E-20   | 164.13    | 1.00                                 | 1986.08982 | 0.00835  | 3      | Cmpd 3205928, +MSn(663.0), 68.9 min  |
| gijl48660172 | MRA_0413        | f420-dependent glucose-6-phosphate dehydrogenase Fgd1 | GEELYTEK#LMPAVR                | pFind         | 20,K(Acetyl_K); | 221,K(Acetyl_K); | 0.00000109 | 155.94    | 1.00                                 | 2189.16331 | -0.14514 | 3      | Cmpd 3204974, +MSn(730.7), 58.1 min  |
|              |                 |                                                       |                                | mascot        | 8,K(Acetyl_K);  | 206,K(Acetyl_K); | 35.96      | 121.97    | 1.00                                 | 1676.84432 | -0.09887 | 2      | Cmpd 1704960, +MSn(839.4), 57.6 min  |
| gijl48660203 | MRA_0443        | molybdopterin biosynthesis protein MoeA2              | GGDHGVEFVK#VAMQGPQGVGR         | pFind         | 8,K(Acetyl_K);  | 206,K(Acetyl_K); | 1.98E-16   | 143.29    | 1.00                                 | 1676.84435 | -0.29891 | 2      | Cmpd 1604737, +MSn(839.3), 46.2 min  |
|              |                 |                                                       |                                | mascot        | 10,K(Acetyl_K); | 279,K(Acetyl_K); | 32.62      | 154.47    | 1.00                                 | 2394.1573  | -0.05913 | 3      | Cmpd 1504777, +MSn(799.0), 55.5 min  |
| gijl48660204 | MRA_0444        | short chain dehydrogenase                             | VVQSSAQSHDK#DLQR               | pFind         | 10,K(Acetyl_K); | 279,K(Acetyl_K); | 0.00000232 | 154.47    | 1.00                                 | 2394.15727 | -0.0591  | 3      | Cmpd 1504777, +MSn(799.0), 55.5 min  |
|              |                 |                                                       |                                | mascot        | 11,K(Acetyl_K); | 291,K(Acetyl_K); | 64.32      | 221.34    | 1.00                                 | 1738.85982 | -0.09437 | 2      | Cmpd 1403139, +MSn(870.4), 34.6 min  |
|              |                 |                                                       | AGAATEVELK#ER                  | pFind         | 11,K(Acetyl_K); | 291,K(Acetyl_K); | 1.16E-20   | 221.34    | 1.00                                 | 1738.85983 | -0.09439 | 2      | Cmpd 1403139, +MSn(870.4), 34.6 min  |
|              |                 |                                                       |                                | mascot        | 10,K(Acetyl_K); | 388,K(Acetyl_K); | 51.48      | 166.42    | 1.00                                 | 1314.6779  | -0.19245 | 2      | Cmpd 302100, +MSn(658.2), 20.9 min   |
|              |                 |                                                       |                                | pFind         | 10,K(Acetyl_K); | 388,K(Acetyl_K); | 3E-14      | 166.42    | 1.00                                 | 1314.67795 | -0.19251 | 2      | Cmpd 302100, +MSn(658.2), 20.9 min   |
|              |                 |                                                       |                                | mascot        | 5,K(Acetyl_K);  | 325,K(Acetyl_K); | 62.13      | 331.87    | 1.00                                 | 2358.19147 | -0.3333  | 3      | Cmpd 2903585, +MSn(787.0), 35.9 min  |
|              |                 |                                                       |                                | pFind         | 5,K(Acetyl_K);  | 325,K(Acetyl_K); | 7.87E-14   | 331.87    | 1.00                                 | 2358.19145 | -0.33328 | 3      | Cmpd 2903585, +MSn(787.0), 35.9 min  |
|              |                 |                                                       |                                | mascot        | 4,K(Acetyl_K);  | 125,K(Acetyl_K); | 50.59      | 186.52    | 1.00                                 | 1271.73364 | -0.1882  | 2      | Cmpd 903757, +MSn(636.8), 36.4 min   |
|              |                 |                                                       |                                | pFind         | 4,K(Acetyl_K);  | 125,K(Acetyl_K); | 1.52E-21   | 186.52    | 1.00                                 | 1271.73367 | -0.18823 | 2      | Cmpd 903757, +MSn(636.8), 36.4 min   |
|              |                 |                                                       |                                | pFind         | 8,K(Acetyl_K);  | 237,K(Acetyl_K); | 5.85E-16   | 103.12    | 1.00                                 | 1506.90213 | -0.13669 | 2      | Cmpd 107789, +MSn(754.4), 81.4 min   |
|              |                 |                                                       |                                | pFind         | 8,K(Acetyl_K);  | 237,K(Acetyl_K); | 2.35E-24   | 203.56    | 1.00                                 | 1506.90213 | -0.21669 | 2      | Cmpd 2908137, +MSn(754.4), 81.1 min  |
|              |                 |                                                       |                                | mascot        | 10,K(Acetyl_K); | 67,K(Acetyl_K);  | 63.65      | 291.27    | 1.00                                 | 2016.03024 | -0.0648  | 2      | Cmpd 1907884, +MSn(1009.0), 83.3 min |
| pFind        | 10,K(Acetyl_K); | 67,K(Acetyl_K);                                       | 2.14E-17                       | 291.27        | 1.00            | 2016.0303        | -0.06486   | 2         | Cmpd 1907884, +MSn(1009.0), 83.3 min |            |          |        |                                      |



|              |          |                                           |                                 |        |                              |                                  |           |        |      |            |          |   |                                      |
|--------------|----------|-------------------------------------------|---------------------------------|--------|------------------------------|----------------------------------|-----------|--------|------|------------|----------|---|--------------------------------------|
|              |          |                                           |                                 | pFind  | 6,K(Acetyl_K);               | 10,K(Acetyl_K);                  | 2.59E-17  | 150.12 | 1.00 | 1603.80935 | -0.04391 | 2 | Cmpd 1605272, +MSn(802.9), 54.8 min  |
| gijl48660416 | MRA_0653 | methoxy mycolic acid synthase 4           | YMK#YLR                         | mascot | 3,K(Acetyl_K);               | 273,K(Acetyl_K);                 | 26.21     | 69.75  | 1.00 | 914.468369 | 0.097079 | 2 | Cmpd 3203330, +MSn(458.3), 39.4 min  |
|              |          |                                           |                                 | pFind  | 3,K(Acetyl_K);               | 273,K(Acetyl_K);                 | 3.07E-13  | 69.75  | 1.00 | 914.468394 | 0.09705  | 2 | Cmpd 3203330, +MSn(458.3), 39.4 min  |
|              |          |                                           | EAK#DLVDGAPK                    | pFind  | 3,K(Acetyl_K);               | 94,K(Acetyl_K);                  | 0.0000003 | 122.92 | 1.00 | 1183.60847 | 0.11697  | 2 | Cmpd 1402590, +MSn(592.9), 30.5 min  |
| gijl48660426 | MRA_0663 | 50S ribosomal protein L7/L12              | EAK#DLVDGAPKPLEK                | mascot | 3,K(Acetyl_K);               | 94,K(Acetyl_K);                  | 74.92     | 193.98 | 1.00 | 1763.96687 | -0.10143 | 2 | Cmpd 1503789, +MSn(882.9), 44.4 min  |
|              |          |                                           |                                 | pFind  | 3,K(Acetyl_K);               | 94,K(Acetyl_K);                  | 7.45E-11  | 193.98 | 1.00 | 1763.96692 | -0.10148 | 2 | Cmpd 1503789, +MSn(882.9), 44.4 min  |
|              |          |                                           | DLVDGAPK#PLEK                   | mascot | 8,K(Acetyl_K);               | 102,K(Acetyl_K);                 | 41.97     | 121.97 | 1.00 | 1435.79222 | -0.02677 | 2 | Cmpd 1706136, +MSn(718.9), 64.7 min  |
|              |          |                                           |                                 | pFind  | 8,K(Acetyl_K);               | 102,K(Acetyl_K);                 | 9.94E-11  | 121.97 | 1.00 | 1435.79225 | -0.02681 | 2 | Cmpd 1706136, +MSn(718.9), 64.7 min  |
| gijl48660441 | MRA_0676 | DNA-directed RNA polymerase subunit beta  | VYVAQK#R                        | mascot | 6,K(Acetyl_K);               | 870,K(Acetyl_K);                 | 28.66     | 77.60  | 1.00 | 904.513031 | 0.012417 | 2 | Cmpd 2502232, +MSn(453.3), 26.6 min  |
|              |          |                                           |                                 | pFind  | 6,K(Acetyl_K);               | 870,K(Acetyl_K);                 | 1.56E-10  | 77.60  | 1.00 | 904.513044 | 0.0124   | 2 | Cmpd 2502232, +MSn(453.3), 26.6 min  |
|              |          |                                           | PEK#DGLFCEK                     | pFind  | 3,K(Acetyl_K);               | 43,K(Acetyl_K);                  | 4.48E-11  | 72.16  | 1.00 | 1263.58054 | -0.0351  | 2 | Cmpd 1403122, +MSn(632.8), 36.5 min  |
| gijl48660442 | MRA_0677 | DNA-directed RNA polymerase subunit beta' | MGHIELAAPVTHIWYFK#GVPSR         | pFind  | 17,K(Acetyl_K);              | 108,K(Acetyl_K);                 | 1.41E-10  | 176.01 | 1.00 | 2550.32056 | -0.16239 | 3 | Cmpd 2505639, +MSn(851.1), 65.9 min  |
|              |          |                                           | NEALVEIWK#EATDEVGQALR           | pFind  | 9,K(Acetyl_K);               | 779,K(Acetyl_K);                 | 3.21E-07  | 222.28 | 1.00 | 2312.16484 | -0.38667 | 3 | Cmpd 2908245, +MSn(771.6), 82.2 min  |
|              |          |                                           | TGTDVPITLK#R                    | mascot | 10,K(Acetyl_K);              | 63,K(Acetyl_K);                  | 47.03     | 138.46 | 1.00 | 1241.69795 | 0.047496 | 2 | Cmpd 1605362, +MSn(621.9), 55.8 min  |
|              |          |                                           |                                 | pFind  | 10,K(Acetyl_K);              | 63,K(Acetyl_K);                  | 1.95E-13  | 138.46 | 1.00 | 1241.69795 | 0.04749  | 2 | Cmpd 1605362, +MSn(621.9), 55.8 min  |
| gijl48660458 | MRA_0692 | 30S ribosomal protein S7                  | REDTHK#MAEANR                   | mascot | 6,K(Acetyl_K);               | 143,K(Acetyl_K);                 | 54.09     | 166.28 | 1.00 | 1498.69463 | -0.06918 | 2 | Cmpd 1502733, +MSn(750.3), 30.0 min  |
|              |          |                                           |                                 | pFind  | 6,K(Acetyl_K);               | 143,K(Acetyl_K);                 | 4.86E-14  | 166.28 | 1.00 | 1498.69467 | -0.06923 | 2 | Cmpd 1502733, +MSn(750.3), 30.0 min  |
|              |          |                                           | DKTGTDVPITLK#R                  | pFind  | 12,K(Acetyl_K);              | 63,K(Acetyl_K);                  | 2.3E-11   | 130.07 | 1.00 | 1484.81986 | -0.11442 | 2 | Cmpd 1403184, +MSn(743.4), 37.2 min  |
| gijl48660459 | MRA_0693 | elongation factor G                       | LGK#LFQMHSNK                    | pFind  | 3,K(Acetyl_K);               | 359,K(Acetyl_K);                 | 6.24E-08  | 86.47  | 1.00 | 1343.70199 | -0.03655 | 2 | Cmpd 2703752, +MSn(672.8), 44.7 min  |
|              |          |                                           |                                 | mascot | 5,K(Acetyl_K);               | 39,K(Acetyl_K);                  | 51.72     | 211.18 | 1.00 | 1596.81476 | -0.06931 | 2 | Cmpd 1705537, +MSn(799.4), 58.6 min  |
|              |          |                                           | VLHDK#FPDLNETK                  | pFind  | 5,K(Acetyl_K);               | 39,K(Acetyl_K);                  | 5.87E-19  | 211.18 | 1.00 | 1596.81477 | -0.06933 | 2 | Cmpd 1705537, +MSn(799.4), 58.6 min  |
|              |          |                                           | VLHDKFPDLNETK#AFDQIDNAPEER      | pFind  | 13,K(Acetyl_K);              | 47,K(Acetyl_K);                  | 0.0000105 | 211.18 | 1.00 | 2982.43593 | -0.27776 | 3 | Cmpd 1504804, +MSn(995.1), 55.8 min  |
|              |          |                                           | FPDLNETK#AFDQIDNAPEER           | mascot | 8,K(Acetyl_K);               | 47,K(Acetyl_K);                  | 35.86     | 256.10 | 1.00 | 2390.1026  | 0.935572 | 3 | Cmpd 1806876, +MSn(798.0), 72.3 min  |
|              |          |                                           | GQVVTKPGTTTPTHEFEGQVYILSK#DEGGR | pFind  | 25,K(Acetyl_K);              | 316,K(Acetyl_K);                 | 1.07E-13  | 203.48 | 1.00 | 3272.63133 | -0.34316 | 3 | Cmpd 1804696, +MSn(1091.8), 54.8 min |
|              |          |                                           |                                 | mascot | 25,K(Acetyl_K);              | 316,K(Acetyl_K);                 | 51.8      | 203.48 | 1.00 | 3272.63136 | -0.34319 | 3 | Cmpd 1804696, +MSn(1091.8), 54.8 min |
|              |          |                                           | ETDK#PFLMPVEDVFTITGR            | pFind  | 4,K(Acetyl_K);               | 210,K(Acetyl_K);                 | 1.02E-17  | 234.44 | 1.00 | 2236.10857 | -0.36313 | 2 | Cmpd 2307193, +MSn(1118.9), 72.2 min |
|              |          |                                           |                                 | mascot | 4,K(Acetyl_K);               | 210,K(Acetyl_K);                 | 45.92     | 234.44 | 1.00 | 2236.10858 | -0.36313 | 2 | Cmpd 2307193, +MSn(1118.9), 72.2 min |
| gijl48660460 | MRA_0694 | elongation factor Tu                      | TTLTAAITK#VLHDK                 | pFind  | 9,K(Acetyl_K);               | 34,K(Acetyl_K);                  | 9.01E-08  | 150.12 | 1.00 | 1552.88246 | -0.05702 | 2 | Cmpd 3205610, +MSn(777.4), 65.3 min  |
|              |          |                                           |                                 | mascot | 9,K(Acetyl_K);               | 34,K(Acetyl_K);                  | 57.24     | 203.56 | 1.00 | 1552.88245 | -0.217   | 2 | Cmpd 1605490, +MSn(777.3), 53.4 min  |
|              |          |                                           | TTLTAAITK#VLHDKFPDLNETK         | pFind  | 9,K(Acetyl_K);               | 34,K(Acetyl_K);                  | 3.52E-08  | 147.66 | 1.00 | 2497.34281 | -0.01464 | 3 | Cmpd 3206455, +MSn(833.5), 74.9 min  |
|              |          |                                           |                                 | mascot | 9,K(Acetyl_K);               | 34,K(Acetyl_K);                  | 43.49     | 116.92 | 1.00 | 2497.34279 | -0.04462 | 3 | Cmpd 4905947, +MSn(833.4), 69.7 min  |
|              |          |                                           | VSALK#ALEGDAK                   | pFind  | 5,K(Acetyl_K);               | 178,K(Acetyl_K);                 | 1.16E-21  | 146.32 | 1.00 | 1242.68197 | -0.03653 | 2 | Cmpd 3204088, +MSn(622.3), 48.0 min  |
|              |          |                                           |                                 | mascot | 5,K(Acetyl_K);               | 178,K(Acetyl_K);                 | 72.71     | 146.32 | 1.00 | 1242.68193 | -0.03648 | 2 | Cmpd 3204088, +MSn(622.3), 48.0 min  |
|              |          |                                           | GQVVTKPGTTTPTHEFEGQVYILSK#DEGGR | mascot | 25,K(Acetyl_K);              | 316,K(Acetyl_K);                 | 45.19     | 158.07 | 1.00 | 3272.63136 | -0.34319 | 3 | Cmpd 4903483, +MSn(1091.8), 41.4 min |
|              |          |                                           |                                 | pFind  | 14,K(Acetyl_K);              | 39,K(Acetyl_K);                  | 9.71E-08  | 121.97 | 1.00 | 2497.34281 | -0.07464 | 3 | Cmpd 3106512, +MSn(833.4), 75.4 min  |
| gijl48660475 | MRA_0708 | 30S ribosomal protein S10                 | LIDIIDPTPK#TVDALMR              | pFind  | 10,K(Acetyl_K);              | 82,K(Acetyl_K);                  | 2.13E-17  | 108.39 | 1.00 | 1952.06525 | -0.15981 | 2 | Cmpd 1806507, +MSn(977.0), 75.5 min  |
|              |          |                                           |                                 | mascot | 10,K(Acetyl_K);              | 82,K(Acetyl_K);                  | 34.91     | 108.39 | 1.00 | 1952.06523 | -0.15978 | 2 | Cmpd 1806507, +MSn(977.0), 75.5 min  |
| gijl48660529 | MRA_0762 | MmsA                                      | VGHSLDPK#ADYGPLVTGAALAR         | mascot | 8,K(Acetyl_K);               | 319,K(Acetyl_K);                 | 45.33     | 167.38 | 1.00 | 2249.18042 | -0.10225 | 3 | Cmpd 1706750, +MSn(750.7), 71.0 min  |
|              |          |                                           |                                 | pFind  | 8,K(Acetyl_K);               | 319,K(Acetyl_K);                 | 2.02E-14  | 167.38 | 1.00 | 2249.18043 | -0.10226 | 3 | Cmpd 1706750, +MSn(750.7), 71.0 min  |
|              |          |                                           | AANEDGTFK#SDEELAK               | mascot | 9,K(Acetyl_K);               | 209,K(Acetyl_K);                 | 62.2      | 146.32 | 1.00 | 1765.8006  | -0.11515 | 2 | Cmpd 1303184, +MSn(883.9), 37.0 min  |
| gijl48660593 | MRA_0825 | thiosulfate sulfurtransferase CysA2       | SDEELAK#LYADAGLDNSK             | pFind  | 9,K(Acetyl_K);               | 209,K(Acetyl_K);                 | 4.41E-15  | 150.97 | 1.00 | 1765.80064 | -0.1352  | 2 | Cmpd 1303164, +MSn(883.8), 36.7 min  |
|              |          |                                           |                                 | mascot | 7,K(Acetyl_K);               | 216,K(Acetyl_K);                 | 56.69     | 194.31 | 1.00 | 1979.93233 | -0.18688 | 2 | Cmpd 1705234, +MSn(990.9), 60.7 min  |
|              |          |                                           |                                 | pFind  | 7,K(Acetyl_K);               | 216,K(Acetyl_K);                 | 7.75E-15  | 194.31 | 1.00 | 1979.93237 | -0.18693 | 2 | Cmpd 1705234, +MSn(990.9), 60.7 min  |
|              |          |                                           | SVDPVELEK#LR                    | mascot | 9,K(Acetyl_K);               | 131,K(Acetyl_K);                 | 68.6      | 201.40 | 1.00 | 1325.71906 | -0.01361 | 2 | Cmpd 1706157, +MSn(663.9), 64.9 min  |
|              |          |                                           |                                 | pFind  | 9,K(Acetyl_K);               | 131,K(Acetyl_K);                 | 3.21E-15  | 201.40 | 1.00 | 1325.71908 | -0.01364 | 2 | Cmpd 1706157, +MSn(663.9), 64.9 min  |
|              |          |                                           | LTDLQLLHELEPVVEK#YLNLR          | pFind  | 16,K(Acetyl_K);              | 20,K(Acetyl_K);                  | 1.98E-10  | 197.03 | 1.00 | 2463.33732 | -0.32915 | 3 | Cmpd 2907553, +MSn(822.0), 75.4 min  |
|              |          |                                           |                                 | mascot | 16,K(Acetyl_K);              | 20,K(Acetyl_K);                  | 34.93     | 197.03 | 1.00 | 2463.33728 | -0.32911 | 3 | Cmpd 2907553, +MSn(822.0), 75.4 min  |
| gijl48660602 | MRA_0834 | fatty acid desaturase                     | KVSAHELHK#TAGK                  | pFind  | 9,K(Acetyl_K);               | 328,K(Acetyl_K);                 | 4.91E-11  | 220.21 | 1.00 | 1446.79431 | -0.10887 | 2 | Cmpd 3202099, +MSn(724.4), 25.2 min  |
|              |          |                                           |                                 | mascot | 9,K(Acetyl_K);               | 328,K(Acetyl_K);                 | 56.99     | 220.21 | 1.00 | 1446.79428 | -0.10883 | 2 | Cmpd 3202099, +MSn(724.4), 25.2 min  |
|              |          |                                           | VSAHELHK#TAGK                   | pFind  | 8,K(Acetyl_K);               | 328,K(Acetyl_K);                 | 2.49E-12  | 130.72 | 1.00 | 1318.69935 | -0.11391 | 2 | Cmpd 3202118, +MSn(660.3), 25.4 min  |
|              |          |                                           |                                 | mascot | 8,K(Acetyl_K);               | 328,K(Acetyl_K);                 | 33.58     | 130.72 | 1.00 | 1318.69933 | -0.11388 | 2 | Cmpd 3202118, +MSn(660.3), 25.4 min  |
|              |          |                                           | IHLDEVVMPVLK#K                  | pFind  | 12,K(Acetyl_K);              | 268,K(Acetyl_K);                 | 3.44E-29  | 126.36 | 1.00 | 1561.89019 | -0.10475 | 2 | Cmpd 3204953, +MSn(781.9), 57.9 min  |
|              |          |                                           |                                 | mascot | 12,K(Acetyl_K);              | 268,K(Acetyl_K);                 | 53.35     | 126.36 | 1.00 | 1561.89017 | -0.10472 | 2 | Cmpd 3204953, +MSn(781.9), 57.9 min  |
| gijl48660608 | MRA_0840 | hypothetical protein                      | ELK#HLLINDLPIER                 | pFind  | 3,K(Acetyl_K);               | 40,K(Acetyl_K);                  | 1.54E-15  | 203.56 | 1.00 | 1743.98832 | -0.16288 | 2 | Cmpd 3205242, +MSn(872.9), 61.1 min  |
|              |          |                                           |                                 | mascot | 3,K(Acetyl_K);               | 40,K(Acetyl_K);                  | 49.04     | 203.56 | 1.00 | 1743.98827 | -0.16282 | 2 | Cmpd 3205242, +MSn(872.9), 61.1 min  |
| gijl48660636 | MRA_0867 | acetyl-CoA acetyltransferase              | PAFEGLAALGGFDDVALQK#YHWVEK      | pFind  | 19,K(Acetyl_K);              | 241,K(Acetyl_K);                 | 7.77E-09  | 147.66 | 1.00 | 2802.40171 | -0.36354 | 3 | Cmpd 2906867, +MSn(935.0), 68.6 min  |
|              |          |                                           | GAGFYEYADGK#R                   | pFind  | 11,K(Acetyl_K);              | 611,K(Acetyl_K);                 | 6.31E-12  | 134.08 | 1.00 | 1374.62041 | 0.04503  | 2 | Cmpd 2403646, +MSn(688.3), 43.2 min  |
|              |          |                                           |                                 | mascot | 11,K(Acetyl_K);              | 611,K(Acetyl_K);                 | 47.82     | 134.08 | 1.00 | 1374.62041 | 0.045041 | 2 | Cmpd 2403646, +MSn(688.3), 43.2 min  |
|              |          |                                           | GKGYSEK#LEAK                    | mascot | 7,K(Acetyl_K);               | 370,K(Acetyl_K);                 | 28.58     | 102.92 | 1.00 | 1250.65062 | -0.14517 | 2 | Cmpd 2802373, +MSn(626.3), 28.9 min  |
|              |          |                                           | GYSEK#LEAK                      | mascot | 5,K(Acetyl_K);               | 370,K(Acetyl_K);                 | 35.39     | 121.97 | 1.00 | 1065.5342  | 0.031253 | 2 | Cmpd 1503877, +MSn(533.8), 41.7 min  |
|              |          |                                           | GYSEK#LEAK#ALER                 | mascot | 5,K(Acetyl_K);9,K(Acetyl_K); | 370,K(Acetyl_K);374,K(Acetyl_K); | 55.09     | 312.05 | 1.00 | 1576.80962 | -0.08417 | 2 | Cmpd 1705977, +MSn(789.4), 63.1 min  |
|              |          |                                           |                                 | pFind  | 5,K(Acetyl_K);9,K(Acetyl_K); | 370,K(Acetyl_K);374,K(Acetyl_K); | 3.13E-21  | 312.05 | 1.00 | 1576.80968 | -0.08424 | 2 | Cmpd 1705977, +MSn(789.4), 63.1 min  |
| gijl48660637 | MRA_0868 | fatty oxidation complex subunit alpha     | AGYEVVLK#DVSLEAAAK              | pFind  | 8,K(Acetyl_K);               | 354,K(Acetyl_K);                 | 5.06E-21  | 222.28 | 1.00 | 1803.96182 | -0.11638 | 2 | Cmpd 1805863, +MSn(902.9), 68.2 min  |
|              |          |                                           |                                 | mascot | 8,K(Acetyl_K);               | 354,K(Acetyl_K);                 | 77.27     | 222.28 | 1.00 | 1803.96179 | -0.11634 | 2 | Cmpd 1805863, +MSn(902.9), 68.2 min  |

|              |          |                                              |                               |        |                               |                                |            |        |      |            |          |   |                                      |
|--------------|----------|----------------------------------------------|-------------------------------|--------|-------------------------------|--------------------------------|------------|--------|------|------------|----------|---|--------------------------------------|
|              |          |                                              | ANPDGAGVQPWVK#K               | mascot | 13,K(Acetyl_K);               | 223,K(Acetyl_K);               | 62.32      | 142.08 | 1.00 | 1523.73685 | -0.0914  | 2 | Cmpd 1403001, +MSn(762.8), 35.1 min  |
|              |          |                                              | LVAEK#DSITGVVVASAK            | mascot | 5,K(Acetyl_K);                | 49,K(Acetyl_K);                | 76.96      | 83.81  | 1.00 | 1727.9669  | -0.10146 | 2 | Cmpd 1706297, +MSn(864.9), 66.4 min  |
|              |          |                                              |                               | pFind  | 5,K(Acetyl_K);                | 49,K(Acetyl_K);                | 1.1E-15    | 83.81  | 1.00 | 1727.96692 | -0.10148 | 2 | Cmpd 1706297, +MSn(864.9), 66.4 min  |
| gijl48660661 | MRA_0891 | phosphoserine aminotransferase               | SLHLTYGEFSAK#FASAVSK          | pFind  | 12,K(Acetyl_K);               | 111,K(Acetyl_K);               | 4.21E-08   | 246.85 | 1.00 | 2084.05785 | -0.33968 | 3 | Cmpd 3804949, +MSn(695.6), 49.1 min  |
|              |          |                                              |                               | mascot | 12,K(Acetyl_K);               | 111,K(Acetyl_K);               | 29.08      | 214.41 | 1.00 | 2084.05783 | -0.24966 | 3 | Cmpd 1605497, +MSn(695.6), 53.5 min  |
|              |          |                                              | SQVVGITDFVDDVDAGTVAK#ILR      | mascot | 20,K(Acetyl_K);               | 328,K(Acetyl_K);               | 25.31      | 113.88 | 1.00 | 2459.2908  | -0.30263 | 3 | Cmpd 4007272, +MSn(820.7), 71.4 min  |
|              |          |                                              |                               | pFind  | 20,K(Acetyl_K);               | 328,K(Acetyl_K);               | 3.19E-08   | 133.43 | 1.00 | 2459.29077 | -0.2726  | 3 | Cmpd 4007292, +MSn(820.7), 71.6 min  |
|              |          |                                              | QAPVK#NLVGR                   | mascot | 5,K(Acetyl_K);                | 55,K(Acetyl_K);                | 44.74      | 89.88  | 1.00 | 1122.65093 | 0.094523 | 2 | Cmpd 3203204, +MSn(562.4), 37.9 min  |
| gijl48660667 | MRA_0897 | citrate synthase 2                           | GEK#LMGFGHR                   | pFind  | 3,K(Acetyl_K);                | 244,K(Acetyl_K);               | 2.65E-13   | 72.16  | 1.00 | 1172.57606 | 0.00938  | 2 | Cmpd 3203354, +MSn(587.3), 39.7 min  |
| gijl48660674 | MRA_0904 | type II citrate synthase                     | EAGVK#LMGFGHR                 | pFind  | 5,K(Acetyl_K);                | 303,K(Acetyl_K);               | 2.08E-09   | 171.02 | 1.00 | 1342.68159 | -0.05615 | 2 | Cmpd 4902856, +MSn(672.3), 34.0 min  |
|              |          |                                              |                               | mascot | 5,K(Acetyl_K);                | 303,K(Acetyl_K);               | 41.5       | 158.61 | 1.00 | 1342.68158 | -0.01613 | 2 | Cmpd 1503722, +MSn(672.3), 43.7 min  |
|              |          |                                              | LLAK#LPTIAAYAYK               | pFind  | 4,K(Acetyl_K);                | 170,K(Acetyl_K);               | 2.64E-15   | 163.41 | 1.00 | 1576.92285 | -0.03741 | 2 | Cmpd 3005640, +MSn(789.4), 65.8 min  |
|              |          |                                              |                               | mascot | 4,K(Acetyl_K);                | 170,K(Acetyl_K);               | 53.55      | 163.41 | 1.00 | 1576.92281 | -0.03736 | 2 | Cmpd 3005640, +MSn(789.4), 65.8 min  |
|              |          |                                              | EQADK#ILAK                    | mascot | 5,K(Acetyl_K);                | 328,K(Acetyl_K);               | 39.82      | 121.97 | 1.00 | 1056.58148 | 0.063966 | 2 | Cmpd 1504041, +MSn(529.3), 43.3 min  |
| gijl48660730 | MRA_0958 | succinyl-CoA synthetase subunit beta         | AIAIEIGRPVMVK#AQVK            | pFind  | 13,K(Acetyl_K);               | 45,K(Acetyl_K);                | 6.45E-13   | 141.55 | 1.00 | 1852.06044 | -0.09227 | 3 | Cmpd 3204052, +MSn(618.3), 47.6 min  |
| gijl48660731 | MRA_0959 | succinyl-CoA synthetase subunit alpha        | AGTTVTHEDK#GGR                | pFind  | 10,K(Acetyl_K);               | 56,K(Acetyl_K);                | 3.02E-11   | 150.89 | 1.00 | 1369.65861 | -0.03317 | 2 | Cmpd 1402609, +MSn(685.8), 29.1 min  |
|              |          |                                              |                               | mascot | 10,K(Acetyl_K);               | 56,K(Acetyl_K);                | 52.22      | 155.94 | 1.00 | 1369.65862 | -0.03317 | 2 | Cmpd 1402589, +MSn(685.8), 28.9 min  |
|              |          |                                              | KAGTTVTHEDK#GGR               | mascot | 11,K(Acetyl_K);               | 56,K(Acetyl_K);                | 41.89      | 196.05 | 1.00 | 1497.75357 | -0.84812 | 2 | Cmpd 1402527, +MSn(749.5), 28.2 min  |
|              |          |                                              |                               | pFind  | 11,K(Acetyl_K);               | 56,K(Acetyl_K);                | 6.65E-12   | 188.67 | 1.00 | 1497.75357 | -0.04813 | 2 | Cmpd 1502502, +MSn(749.5), 27.6 min  |
|              |          |                                              | K#AGTTVTHEDK#GGR              | mascot | 1,K(Acetyl_K);11,K(Acetyl_K); | 46,K(Acetyl_K);56,K(Acetyl_K); | 71.18      | 335.51 | 1.00 | 1539.76413 | -1.03868 | 2 | Cmpd 1402851, +MSn(770.4), 31.6 min  |
| gijl48660733 | MRA_0961 | transmembrane protein                        | PK#FDPYGQYGR                  | pFind  | 2,K(Acetyl_K);                | 167,K(Acetyl_K);               | 1.23E-12   | 118.26 | 1.00 | 1368.64624 | -0.0808  | 2 | Cmpd 2603630, +MSn(685.3), 43.0 min  |
| gijl48660799 | MRA_1025 | ribose-phosphate pyrophosphokinase           | IAEK#WADALGGVPLAFIHK          | pFind  | 4,K(Acetyl_K);                | 187,K(Acetyl_K);               | 5.73E-13   | 154.47 | 1.00 | 2077.13605 | -0.10788 | 3 | Cmpd 2305807, +MSn(693.3), 58.6 min  |
|              |          |                                              |                               | mascot | 4,K(Acetyl_K);                | 187,K(Acetyl_K);               | 55.98      | 154.47 | 1.00 | 2077.13602 | -0.10785 | 3 | Cmpd 2305807, +MSn(693.3), 58.6 min  |
| gijl48660879 | MRA_1104 | serine hydroxymethyltransferase              | SAPLAEVDPDIAELLAK#ELGR        | pFind  | 17,K(Acetyl_K);               | 18,K(Acetyl_K);                | 0.0000128  | 105.56 | 1.00 | 2248.19508 | -0.28691 | 3 | Cmpd 2307356, +MSn(750.3), 73.8 min  |
| gijl48660884 | MRA_1109 | fumarate hydratase                           | VPK#ALWR                      | pFind  | 4,K(Acetyl_K);                | 25,K(Acetyl_K);                | 7.26E-09   | 61.36  | 1.00 | 981.575994 | 0.04945  | 2 | Cmpd 3103839, +MSn(491.8), 45.0 min  |
|              |          |                                              |                               | mascot | 4,K(Acetyl_K);                | 25,K(Acetyl_K);                | 35.6       | 61.36  | 1.00 | 981.575958 | 0.04949  | 2 | Cmpd 3103839, +MSn(491.8), 45.0 min  |
| gijl48660908 | MRA_1131 | 6-phosphogluconate dehydrogenase             | HEK#LLFK                      | pFind  | 3,K(Acetyl_K);                | 107,K(Acetyl_K);               | 6.25E-13   | 110.50 | 1.00 | 955.549104 | 0.15634  | 2 | Cmpd 3203391, +MSn(478.9), 40.1 min  |
|              |          |                                              |                               | mascot | 3,K(Acetyl_K);                | 107,K(Acetyl_K);               | 27.83      | 110.50 | 1.00 | 955.549072 | 0.156376 | 2 | Cmpd 3203391, +MSn(478.9), 40.1 min  |
| gijl48660947 | MRA_1170 | pterin-4-alpha-carbinolamine dehydratase     | SIK#FPTFMAGIDAVR              | pFind  | 3,K(Acetyl_K);                | 31,K(Acetyl_K);                | 7.79E-11   | 65.00  | 1.00 | 1693.88616 | -0.32072 | 2 | Cmpd 2305495, +MSn(847.8), 55.6 min  |
| gijl48660967 | MRA_1190 | hypothetical protein                         | K#ILTPPARPVAR                 | pFind  | 1,K(Acetyl_K);                | 847,K(Acetyl_K);               | 0.00000175 | 78.12  | 1.00 | 1359.83506 | -0.08962 | 2 | Cmpd 2207140, +MSn(680.9), 82.9 min  |
|              |          |                                              |                               | mascot | 10,K(Acetyl_K);               | 147,K(Acetyl_K);               | 56.43      | 166.42 | 1.00 | 1475.77728 | -0.01184 | 2 | Cmpd 906292, +MSn(738.9), 73.5 min   |
| gijl48660988 | MRA_1210 | tetrahydrodipicolinate N-succinyltransferase | GPVTYGVGVDK#FPR               | pFind  | 10,K(Acetyl_K);               | 147,K(Acetyl_K);               | 2.6E-18    | 166.42 | 1.00 | 1475.77726 | -0.01182 | 2 | Cmpd 906292, +MSn(738.9), 73.5 min   |
|              |          |                                              |                               | mascot | 11,K(Acetyl_K);               | 147,K(Acetyl_K);               | 40.04      | 108.39 | 1.00 | 1631.87839 | -0.02022 | 3 | Cmpd 3204056, +MSn(545.0), 47.7 min  |
|              |          |                                              | RGPVTYGVGVDK#FPR              | pFind  | 11,K(Acetyl_K);               | 147,K(Acetyl_K);               | 1.29E-08   | 161.56 | 1.00 | 1631.87837 | -0.05293 | 2 | Cmpd 905938, +MSn(816.9), 69.4 min   |
|              |          |                                              |                               | mascot | 11,K(Acetyl_K);               | 147,K(Acetyl_K);               | 1.29E-08   | 161.56 | 1.00 | 1631.87837 | -0.05293 | 2 | Cmpd 905938, +MSn(816.9), 69.4 min   |
| gijl48661027 | MRA_1249 | malate dehydrogenase                         | NAAEVVNDQAWIEDEFIPTVAK#R      | mascot | 22,K(Acetyl_K);               | 226,K(Acetyl_K);               | 37.16      | 190.18 | 1.00 | 2656.31326 | -0.01509 | 3 | Cmpd 1908139, +MSn(886.4), 86.0 min  |
|              |          |                                              |                               | pFind  | 22,K(Acetyl_K);               | 226,K(Acetyl_K);               | 1.42E-11   | 190.18 | 1.00 | 2656.3133  | -0.01513 | 3 | Cmpd 1908139, +MSn(886.4), 86.0 min  |
| gijl48661035 | MRA_1256 | alpha-ketoglutarate decarboxylase            | IVINNQLK#R                    | pFind  | 8,K(Acetyl_K);                | 133,K(Acetyl_K);               | 2.06E-12   | 138.46 | 1.00 | 1138.68224 | -0.0168  | 2 | Cmpd 2403323, +MSn(570.3), 39.5 min  |
|              |          |                                              |                               | mascot | 8,K(Acetyl_K);                | 133,K(Acetyl_K);               | 42.95      | 138.46 | 1.00 | 1138.68221 | -0.01676 | 2 | Cmpd 2403323, +MSn(570.3), 39.5 min  |
|              |          |                                              | VDGFAGAQQY#K                  | mascot | 10,K(Acetyl_K);               | 415,K(Acetyl_K);               | 28.59      | 118.26 | 1.00 | 1224.61388 | -0.06843 | 2 | Cmpd 2603004, +MSn(613.3), 35.8 min  |
|              |          |                                              |                               | pFind  | 10,K(Acetyl_K);               | 415,K(Acetyl_K);               | 5.39E-10   | 118.26 | 1.00 | 1224.61388 | -0.06844 | 2 | Cmpd 2603004, +MSn(613.3), 35.8 min  |
| gijl48661080 | MRA_1300 | arginyl-tRNA synthetase                      | NAAELALIPDTNHLELLNHDK#EGTLLR  | pFind  | 21,K(Acetyl_K);               | 462,K(Acetyl_K);               | 4.22E-08   | 102.90 | 1.00 | 3051.59891 | -0.17074 | 3 | Cmpd 1907512, +MSn(1018.1), 79.4 min |
| gijl48661094 | MRA_1314 | ATP synthase F0F1 subunit B                  | AEQQVASTLQTAHEQLK#R           | mascot | 17,K(Acetyl_K);               | 134,K(Acetyl_K);               | 74.62      | 279.48 | 1.00 | 2079.07085 | -0.0854  | 2 | Cmpd 1605153, +MSn(1040.5), 53.6 min |
|              |          |                                              |                               | pFind  | 17,K(Acetyl_K);               | 134,K(Acetyl_K);               | 4.19E-12   | 279.48 | 1.00 | 2079.07088 | -0.08544 | 2 | Cmpd 1605153, +MSn(1040.5), 53.6 min |
| gijl48661096 | MRA_1316 | ATP synthase F0F1 subunit alpha              | LTEVIK#NFK                    | pFind  | 6,K(Acetyl_K);                | 505,K(Acetyl_K);               | 9.56E-15   | 89.88  | 1.00 | 1132.64921 | 0.03623  | 2 | Cmpd 1705548, +MSn(567.3), 58.7 min  |
|              |          |                                              | GFAATGGGSVVPDEHVEALDEDK#LAK   | pFind  | 23,K(Acetyl_K);               | 532,K(Acetyl_K);               | 4.34E-14   | 246.66 | 1.00 | 2653.28714 | -0.16897 | 3 | Cmpd 1704533, +MSn(885.4), 52.8 min  |
|              |          |                                              |                               | mascot | 23,K(Acetyl_K);               | 532,K(Acetyl_K);               | 64.46      | 246.66 | 1.00 | 2653.28714 | -0.16897 | 3 | Cmpd 1704533, +MSn(885.4), 52.8 min  |
|              |          |                                              | DSQK#LTEEAADK                 | pFind  | 4,K(Acetyl_K);                | 491,K(Acetyl_K);               | 4.02E-09   | 106.41 | 1.00 | 1375.6467  | -0.18126 | 2 | Cmpd 200609, +MSn(688.7), 23.4 min   |
| gijl48661098 | MRA_1318 | ATP synthase F0F1 subunit beta               | GHVFNALGDCLDEPGYGEK#FEHWSIHR  | pFind  | 19,K(Acetyl_K);               | 125,K(Acetyl_K);               | 2.24E-15   | 234.83 | 1.00 | 3211.45701 | -0.30884 | 3 | Cmpd 1505374, +MSn(1071.4), 62.3 min |
|              |          |                                              |                               | mascot | 19,K(Acetyl_K);               | 125,K(Acetyl_K);               | 54.12      | 234.83 | 1.00 | 3211.45702 | -0.30884 | 3 | Cmpd 1505374, +MSn(1071.4), 62.3 min |
|              |          |                                              | GDFDHVPEQAFFLIGLDDLAK#K       | pFind  | 22,K(Acetyl_K);               | 477,K(Acetyl_K);               | 5.2E-08    | 109.99 | 1.00 | 2573.28021 | -0.38204 | 3 | Cmpd 2307155, +MSn(858.6), 71.8 min  |
| gijl48661112 | MRA_1331 | acetyl-CoA acetyltransferase                 | ANTTAAALAGLK#PAFR             | pFind  | 12,K(Acetyl_K);               | 229,K(Acetyl_K);               | 3.77E-07   | 69.75  | 1.00 | 1613.88894 | -0.1035  | 2 | Cmpd 3205046, +MSn(807.9), 58.9 min  |
| gijl48661113 | MRA_1332 | thioredoxin-related protein                  | GK#WLSASVNVDPVAPR             | pFind  | 2,K(Acetyl_K);                | 95,K(Acetyl_K);                | 1.64E-13   | 142.76 | 1.00 | 1639.8682  | -0.20276 | 2 | Cmpd 3205058, +MSn(820.8), 59.0 min  |
|              |          |                                              |                               | mascot | 2,K(Acetyl_K);                | 95,K(Acetyl_K);                | 60.08      | 142.76 | 1.00 | 1639.8682  | -0.20275 | 2 | Cmpd 3205058, +MSn(820.8), 59.0 min  |
| gijl48661183 | MRA_1401 | S-adenosylmethionine synthetase              | LDTVVISTQHAADIDLEK#TLDPDIR    | pFind  | 18,K(Acetyl_K);               | 213,K(Acetyl_K);               | 0.00000284 | 92.11  | 1.00 | 2819.45527 | -0.1371  | 3 | Cmpd 1907473, +MSn(940.8), 78.9 min  |
|              |          |                                              |                               | pFind  | 8,K(Acetyl_K);                | 250,K(Acetyl_K);               | 1.84E-09   | 100.39 | 1.00 | 2297.22019 | -0.23202 | 3 | Cmpd 3205887, +MSn(766.7), 68.4 min  |
|              |          |                                              | VLVNPTGK#FVLGGPMGDAGLTGR      | mascot | 8,K(Acetyl_K);                | 250,K(Acetyl_K);               | 26.83      | 92.11  | 1.00 | 2297.22022 | -0.17204 | 3 | Cmpd 3205908, +MSn(766.7), 68.6 min  |
| gijl48661240 | MRA_1457 | transaldolase                                | IVDRPNLFK#IPATK               | mascot | 10,K(Acetyl_K);               | 143,K(Acetyl_K);               | 34.96      | 88.90  | 1.00 | 1766.04541 | 2.372762 | 3 | Cmpd 806714, +MSn(590.5), 78.7 min   |
| gijl48661268 | MRA_1485 | aconitate hydratase                          | VLALLGDSVTTDHISPAIAIK#PGTPAAR | mascot | 21,K(Acetyl_K);               | 729,K(Acetyl_K);               | 50.51      | 246.10 | 1.00 | 2769.50249 | -0.16432 | 3 | Cmpd 1806825, +MSn(924.1), 71.8 min  |
|              |          |                                              |                               | pFind  | 21,K(Acetyl_K);               | 729,K(Acetyl_K);               | 3.05E-13   | 246.10 | 1.00 | 2769.5025  | -0.16433 | 3 | Cmpd 1806825, +MSn(924.1), 71.8 min  |
| gijl48661273 | MRA_1490 | hypothetical protein                         | GDIDDPK#LAAALR                | mascot | 7,K(Acetyl_K);                | 24,K(Acetyl_K);                | 77.52      | 150.89 | 1.00 | 1395.73576 | -0.03032 | 2 | Cmpd 1706182, +MSn(698.9), 65.2 min  |
|              |          |                                              |                               | pFind  | 7,K(Acetyl_K);                | 24,K(Acetyl_K);                | 2.93E-18   | 150.89 | 1.00 | 1395.7358  | -0.03036 | 2 | Cmpd 1706182, +MSn(698.9), 65.2 min  |
| gijl48661276 | MRA_1493 | 3-oxoacyl-ACP reductase                      | MTEEK#FEKVINANLTGAFR          | pFind  | 5,K(Acetyl_K);                | 104,K(Acetyl_K);               | 1.86E-07   | 154.20 | 1.00 | 2239.1307  | -0.13253 | 3 | Cmpd 4904972, +MSn(747.3), 58.5 min  |
| gijl48661281 | MRA_1497 | hypothetical protein                         | AIEK#TFAAIK                   | pFind  | 4,K(Acetyl_K);                | 259,K(Acetyl_K);               | 4.04E-15   | 221.34 | 1.00 | 1132.64921 | 0.11623  | 2 | Cmpd 3203876, +MSn(567.4), 45.6 min  |

|              |          |                                                                    |                                       |        |                                                        |                                                            |            |        |      |            |          |   |                                      |
|--------------|----------|--------------------------------------------------------------------|---------------------------------------|--------|--------------------------------------------------------|------------------------------------------------------------|------------|--------|------|------------|----------|---|--------------------------------------|
|              |          |                                                                    |                                       | mascot | 4,K(Acetyl_K);                                         | 259,K(Acetyl_K);                                           | 46.36      | 221.34 | 1.00 | 1132.64917 | 0.116278 | 2 | Cmpd 3203876, +MSn(567.4), 45.6 min  |
| gijl48661317 | MRA_1533 | acyl-CoA synthetase                                                | LVAIIELK#K                            | mascot | 8,K(Acetyl_K);                                         | 513,K(Acetyl_K);                                           | 34.26      | 58.12  | 1.00 | 1067.69539 | 0.090059 | 2 | Cmpd 3004704, +MSn(534.9), 55.1 min  |
|              |          |                                                                    |                                       | pFind  | 8,K(Acetyl_K);                                         | 513,K(Acetyl_K);                                           | 6.97E-15   | 58.12  | 1.00 | 1067.69543 | 0.09001  | 2 | Cmpd 3004704, +MSn(534.9), 55.1 min  |
| gijl48661325 | MRA_1541 | acyl-CoA synthetase                                                | LVAIIELK#K                            | mascot | 8,K(Acetyl_K);                                         | 514,K(Acetyl_K);                                           | 34.26      | 58.12  | 1.00 | 1067.69539 | 0.090059 | 2 | Cmpd 3004704, +MSn(534.9), 55.1 min  |
| gijl48661329 | MRA_1545 | hypothetical protein                                               | DVVAAVSNAGGFILGAVAHSPK#R              | mascot | 23,K(Acetyl_K);                                        | 45,K(Acetyl_K);                                            | 56.09      | 190.18 | 1.00 | 2334.24443 | 0.003741 | 3 | Cmpd 1907493, +MSn(779.1), 79.1 min  |
|              |          |                                                                    |                                       | pFind  | 23,K(Acetyl_K);                                        | 45,K(Acetyl_K);                                            | 7.05E-10   | 190.18 | 1.00 | 2334.24443 | 0.00374  | 3 | Cmpd 1907493, +MSn(779.1), 79.1 min  |
| gijl48661422 | MRA_1637 | lipid-transfer protein                                             | M#DLYGATVEDFAQVK#VK#                  | pFind  | 1,M(Oxidation_M_15.995);15,K(Acetyl_K);17,K(Acetyl_K); | 158,M(Oxidation_M_15.995);172,K(Acetyl_K);174,K(Acetyl_K); | 0.000263   | 86.47  | 1.00 | 2012.97649 | 0.36168  | 3 | Cmpd 4606165, +MSn(672.1), 71.1 min  |
| gijl48661425 | MRA_1640 | 30S ribosomal protein S1                                           | VTK#LVVPGAFVVR                        | pFind  | 3,K(Acetyl_K);                                         | 303,K(Acetyl_K);                                           | 3.88E-13   | 130.72 | 1.00 | 1374.80236 | 0.02308  | 2 | Cmpd 3005759, +MSn(688.4), 67.1 min  |
|              |          |                                                                    |                                       | mascot | 3,K(Acetyl_K);                                         | 303,K(Acetyl_K);                                           | 38.69      | 130.72 | 1.00 | 1374.80237 | 0.02308  | 2 | Cmpd 3005759, +MSn(688.4), 67.1 min  |
|              |          |                                                                    |                                       | pFind  | 8,K(Acetyl_K);                                         | 167,K(Acetyl_K);                                           | 1.88E-10   | 142.76 | 1.00 | 1544.80862 | -0.26318 | 2 | Cmpd 903920, +MSn(773.3), 37.9 min   |
|              |          |                                                                    |                                       | pFind  | 15,K(Acetyl_K);                                        | 74,K(Acetyl_K);                                            | 2.81E-12   | 269.89 | 1.00 | 1954.01599 | -0.27055 | 2 | Cmpd 104353, +MSn(977.9), 46.6 min   |
| gijl48661431 | MRA_1646 | hypothetical protein                                               | VTGTAPIYEILHDAK#ER                    | mascot | 15,K(Acetyl_K);                                        | 74,K(Acetyl_K);                                            | 51.18      | 269.89 | 1.00 | 1954.01596 | -0.27051 | 2 | Cmpd 104353, +MSn(977.9), 46.6 min   |
|              |          |                                                                    |                                       | mascot | 6,K(Acetyl_K);                                         | 54,K(Acetyl_K);                                            | 38.53      | 188.67 | 1.00 | 1293.6452  | -0.23976 | 2 | Cmpd 902696, +MSn(647.7), 26.1 min   |
|              |          |                                                                    |                                       | pFind  | 6,K(Acetyl_K);                                         | 54,K(Acetyl_K);                                            | 1.11E-13   | 188.67 | 1.00 | 1293.64524 | -0.2398  | 2 | Cmpd 902696, +MSn(647.7), 26.1 min   |
| gijl48661454 | MRA_1669 | argininosuccinate synthase                                         | GFVYVHGLSSK#LAAR                      | pFind  | 11,K(Acetyl_K);                                        | 390,K(Acetyl_K);                                           | 8.31E-15   | 121.97 | 1.00 | 1645.89402 | -0.10858 | 2 | Cmpd 3204487, +MSn(823.9), 52.6 min  |
|              |          |                                                                    |                                       | mascot | 11,K(Acetyl_K);                                        | 390,K(Acetyl_K);                                           | 41.38      | 121.97 | 1.00 | 1645.89401 | -0.10856 | 2 | Cmpd 3204487, +MSn(823.9), 52.6 min  |
| gijl48661496 | MRA_1708 | CTP synthetase                                                     | IALVGK#YVELSDAYLSVAEALR               | pFind  | 6,K(Acetyl_K);                                         | 309,K(Acetyl_K);                                           | 1.22E-08   | 191.11 | 1.00 | 2421.31551 | -0.33734 | 3 | Cmpd 3608677, +MSn(808.0), 85.8 min  |
| gijl48661529 | MRA_1741 | succinic semialdehyde dehydrogenase                                | IYVEK#DIAEEFTR                        | mascot | 5,K(Acetyl_K);                                         | 298,K(Acetyl_K);                                           | 52.19      | 228.66 | 1.00 | 1653.82497 | 0.040482 | 2 | Cmpd 1806968, +MSn(827.9), 73.3 min  |
|              |          |                                                                    |                                       | pFind  | 5,K(Acetyl_K);                                         | 298,K(Acetyl_K);                                           | 3.79E-21   | 228.66 | 1.00 | 1653.82499 | 0.04045  | 2 | Cmpd 1806968, +MSn(827.9), 73.3 min  |
| gijl48661530 | MRA_1742 | hypothetical protein                                               | PVNPDRPSIGCGIK#WR                     | pFind  | 15,K(Acetyl_K);                                        | 180,K(Acetyl_K);                                           | 0.0000066  | 163.41 | 1.00 | 2021.02651 | -0.00834 | 3 | Cmpd 1605731, +MSn(674.7), 59.5 min  |
| gijl48661633 | MRA_1839 | hypothetical protein                                               | ADFLSELDAPAQAGTESAVSGVEGLPPGSALLVVK#R | mascot | 35,K(Acetyl_K);                                        | 61,K(Acetyl_K);                                            | 46.06      | 188.81 | 1.00 | 3592.86244 | -0.32427 | 3 | Cmpd 1908886, +MSn(1198.5), 94.2 min |
|              |          |                                                                    |                                       | pFind  | 35,K(Acetyl_K);                                        | 61,K(Acetyl_K);                                            | 5.21E-13   | 188.81 | 1.00 | 3592.86246 | -0.32429 | 3 | Cmpd 1908886, +MSn(1198.5), 94.2 min |
|              |          |                                                                    |                                       | mascot | 18,K(Acetyl_K);                                        | 141,K(Acetyl_K);                                           | 118.05     | 258.93 | 1.00 | 2185.1015  | 0.903947 | 2 | Cmpd 1706740, +MSn(1094.0), 70.9 min |
|              |          |                                                                    |                                       | pFind  | 18,K(Acetyl_K);                                        | 141,K(Acetyl_K);                                           | 2.16E-10   | 186.24 | 1.00 | 2185.10151 | -0.15607 | 2 | Cmpd 1706796, +MSn(1093.5), 71.4 min |
| gijl48661643 | MRA_1848 | malate synthase G                                                  | DELQAQIDK#WHR                         | pFind  | 9,K(Acetyl_K);                                         | 66,K(Acetyl_K);                                            | 1.47E-14   | 253.97 | 1.00 | 1579.77431 | -0.10887 | 2 | Cmpd 2803887, +MSn(790.8), 46.3 min  |
|              |          |                                                                    |                                       | mascot | 9,K(Acetyl_K);                                         | 66,K(Acetyl_K);                                            | 66.8       | 253.97 | 1.00 | 1579.77428 | -0.10883 | 2 | Cmpd 2803887, +MSn(790.8), 46.3 min  |
| gijl48661733 | MRA_1936 | fatty-acid-CoA ligase                                              | NIK#YVGDVLYAYR                        | pFind  | 3,K(Acetyl_K);                                         | 45,K(Acetyl_K);                                            | 2.5E-14    | 138.46 | 1.00 | 1451.77725 | -0.07181 | 2 | Cmpd 3004793, +MSn(726.9), 56.1 min  |
| gijl48661810 | MRA_2012 | hypothetical protein                                               | NLEDEQEK#M#LAR                        | pFind  | 8,K(Acetyl_K);9,M(Oxidation_M_15.995);                 | 233,K(Acetyl_K);234,M(Oxidation_M_15.995);                 | 2.98E-16   | 196.05 | 1.00 | 1532.71407 | 0.29137  | 2 | Cmpd 1502912, +MSn(767.5), 34.5 min  |
|              |          |                                                                    |                                       | mascot | 8,K(Acetyl_K);9,M(Oxidation_M_15.995);                 | 233,K(Acetyl_K);234,M(Oxidation_M_15.995);                 | 61.78      | 196.05 | 1.00 | 1532.71402 | 0.291428 | 2 | Cmpd 1502912, +MSn(767.5), 34.5 min  |
|              |          |                                                                    |                                       | pFind  | 8,K(Acetyl_K);                                         | 233,K(Acetyl_K);                                           | 4.84E-20   | 234.16 | 1.00 | 1516.71916 | -0.09372 | 2 | Cmpd 3203598, +MSn(759.3), 42.5 min  |
|              |          |                                                                    |                                       | mascot | 8,K(Acetyl_K);                                         | 233,K(Acetyl_K);                                           | 83.19      | 234.16 | 1.00 | 1516.7191  | -0.09365 | 2 | Cmpd 3203598, +MSn(759.3), 42.5 min  |
| gijl48661816 | MRA_2018 | 20-beta-hydroxysteroid dehydrogenase FabG3                         | VVFGDILDEEGK#AVAAELADAAR              | pFind  | 12,K(Acetyl_K);                                        | 45,K(Acetyl_K);                                            | 2.51E-10   | 175.58 | 1.00 | 2400.21727 | -0.3891  | 3 | Cmpd 2907872, +MSn(800.9), 78.5 min  |
|              |          |                                                                    |                                       | mascot | 12,K(Acetyl_K);                                        | 45,K(Acetyl_K);                                            | 38.61      | 175.58 | 1.00 | 2400.21724 | -0.38907 | 3 | Cmpd 2907872, +MSn(800.9), 78.5 min  |
|              |          |                                                                    |                                       | mascot | 10,K(Acetyl_K);15,M(Oxidation_M_15.995);               | 64,K(Acetyl_K);69,M(Oxidation_M_15.995);                   | 57.88      | 228.66 | 1.00 | 1925.94045 | -0.115   | 2 | Cmpd 1706315, +MSn(963.9), 66.5 min  |
|              |          |                                                                    |                                       | pFind  | 10,K(Acetyl_K);15,M(Oxidation_M_15.995);               | 64,K(Acetyl_K);69,M(Oxidation_M_15.995);                   | 1.8E-19    | 191.11 | 1.00 | 1925.94044 | -0.115   | 2 | Cmpd 1706333, +MSn(963.9), 66.7 min  |
|              |          |                                                                    |                                       | mascot | 10,K(Acetyl_K);                                        | 64,K(Acetyl_K);                                            | 77.62      | 248.64 | 1.00 | 1909.94553 | -0.12008 | 2 | Cmpd 1906866, +MSn(955.9), 72.6 min  |
|              |          |                                                                    |                                       | pFind  | 10,K(Acetyl_K);                                        | 64,K(Acetyl_K);                                            | 1.72E-17   | 248.64 | 1.00 | 1909.94553 | -0.12009 | 2 | Cmpd 1906866, +MSn(955.9), 72.6 min  |
|              |          |                                                                    |                                       | pFind  | 5,K(Acetyl_K);                                         | 119,K(Acetyl_K);                                           | 0.00000265 | 206.91 | 1.00 | 2334.23185 | -0.37368 | 3 | Cmpd 2903957, +MSn(779.0), 39.6 min  |
|              |          |                                                                    |                                       | mascot | 5,K(Acetyl_K);                                         | 119,K(Acetyl_K);                                           | 34.89      | 206.91 | 1.00 | 2334.23184 | -0.37367 | 3 | Cmpd 2903957, +MSn(779.0), 39.6 min  |
|              |          |                                                                    |                                       | pFind  | 7,K(Acetyl_K);                                         | 78,K(Acetyl_K);                                            | 8.44E-17   | 142.08 | 1.00 | 1171.6197  | -0.17426 | 2 | Cmpd 1602153, +MSn(586.7), 21.2 min  |
|              |          |                                                                    |                                       | mascot | 7,K(Acetyl_K);                                         | 78,K(Acetyl_K);                                            | 48.19      | 142.08 | 1.00 | 1171.61968 | -0.17423 | 2 | Cmpd 1602153, +MSn(586.7), 21.2 min  |
|              |          |                                                                    |                                       | pFind  | 13,K(Acetyl_K);                                        | 132,K(Acetyl_K);                                           | 2.39E-13   | 208.67 | 1.00 | 1755.96183 | -0.27639 | 2 | Cmpd 2903737, +MSn(878.8), 37.4 min  |
|              |          |                                                                    |                                       | mascot | 13,K(Acetyl_K);                                        | 132,K(Acetyl_K);                                           | 26.6       | 208.67 | 1.00 | 1755.96182 | -0.27638 | 2 | Cmpd 2903737, +MSn(878.8), 37.4 min  |
|              |          |                                                                    |                                       | pFind  | 17,K(Acetyl_K);                                        | 136,K(Acetyl_K);                                           | 3.62E-13   | 216.08 | 0.61 | 2403.34856 | -0.16039 | 3 | Cmpd 1704603, +MSn(802.1), 53.6 min  |
|              |          |                                                                    |                                       |        | 13,K(Acetyl_K);                                        | 132,K(Acetyl_K);                                           |            |        | 0.39 |            |          |   | Cmpd 1704603, +MSn(802.1), 53.6 min  |
|              |          |                                                                    |                                       | mascot | 17,K(Acetyl_K);                                        | 136,K(Acetyl_K);                                           | 64.78      | 216.08 | 0.61 | 2403.34854 | -0.16037 | 3 | Cmpd 1704603, +MSn(802.1), 53.6 min  |
|              |          |                                                                    |                                       |        | 13,K(Acetyl_K);                                        | 132,K(Acetyl_K);                                           |            |        | 0.39 |            |          |   | Cmpd 1704603, +MSn(802.1), 53.6 min  |
|              |          |                                                                    |                                       | pFind  | 17,K(Acetyl_K);                                        | 136,K(Acetyl_K);                                           | 6.43E-11   | 228.66 | 1.00 | 2403.34856 | -0.13039 | 3 | Cmpd 1804947, +MSn(802.1), 57.7 min  |
|              |          |                                                                    |                                       | mascot | 17,K(Acetyl_K);                                        | 136,K(Acetyl_K);                                           | 51.65      | 228.66 | 1.00 | 2403.34854 | -0.13037 | 3 | Cmpd 1804947, +MSn(802.1), 57.7 min  |
|              |          |                                                                    |                                       | mascot | 4,K(Acetyl_K);                                         | 85,K(Acetyl_K);                                            | 51.24      | 214.19 | 1.00 | 1136.50981 | -0.02436 | 2 | Cmpd 1403310, +MSn(569.3), 36.4 min  |
|              |          |                                                                    |                                       | pFind  | 4,K(Acetyl_K);                                         | 85,K(Acetyl_K);                                            | 8.92E-15   | 214.19 | 1.00 | 1136.50982 | -0.02438 | 2 | Cmpd 1403310, +MSn(569.3), 36.4 min  |
|              |          |                                                                    |                                       | pFind  | 14,K(Acetyl_K);                                        | 114,K(Acetyl_K);                                           | 1.05E-20   | 408.93 | 1.00 | 2078.00554 | -0.2601  | 2 | Cmpd 2101416, +MSn(1039.9), 55.3 min |
|              |          |                                                                    |                                       | mascot | 14,K(Acetyl_K);                                        | 114,K(Acetyl_K);                                           | 134.59     | 408.93 | 1.00 | 2078.00554 | -0.26009 | 2 | Cmpd 2101416, +MSn(1039.9), 55.3 min |
|              |          |                                                                    |                                       | pFind  | 9,K(Acetyl_K);                                         | 140,K(Acetyl_K);                                           | 1.23E-28   | 138.46 | 1.00 | 1446.78708 | -0.22164 | 2 | Cmpd 2301495, +MSn(724.3), 15.7 min  |
|              |          |                                                                    |                                       | mascot | 9,K(Acetyl_K);                                         | 140,K(Acetyl_K);                                           | 45.83      | 138.46 | 1.00 | 1446.78708 | -0.22163 | 2 | Cmpd 2301495, +MSn(724.3), 15.7 min  |
| gijl48661955 | MRA_2154 | hypothetical protein                                               | YYVAVHAVK#VEK                         | mascot | 9,K(Acetyl_K);                                         | 140,K(Acetyl_K);                                           | 45.83      | 138.46 | 1.00 | 1446.78708 | -0.22163 | 2 | Cmpd 2301495, +MSn(724.3), 15.7 min  |
| gijl48661956 | MRA_2155 | hypothetical protein                                               | MLK#AVLHDTANPTMLK                     | pFind  | 3,K(Acetyl_K);                                         | 294,K(Acetyl_K);                                           | 1.25E-22   | 218.16 | 1.00 | 1823.96376 | -0.13832 | 2 | Cmpd 3204402, +MSn(912.9), 51.6 min  |
|              |          |                                                                    |                                       | mascot | 3,K(Acetyl_K);                                         | 294,K(Acetyl_K);                                           | 58.06      | 218.16 | 1.00 | 1823.96373 | -0.13828 | 2 | Cmpd 3204402, +MSn(912.9), 51.6 min  |
| gijl48661961 | MRA_2160 | hypothetical protein                                               | PLTPADVHNVAFSK#PPIGK                  | pFind  | 14,K(Acetyl_K);                                        | 15,K(Acetyl_K);                                            | 3.12E-08   | 146.32 | 1.00 | 2029.09966 | -0.04149 | 3 | Cmpd 1504452, +MSn(677.4), 51.9 min  |
|              |          |                                                                    |                                       | mascot | 14,K(Acetyl_K);                                        | 15,K(Acetyl_K);                                            | 29.84      | 146.32 | 1.00 | 2029.09966 | -0.04148 | 3 | Cmpd 1504452, +MSn(677.4), 51.9 min  |
|              |          |                                                                    |                                       | pFind  | 19,K(Acetyl_K);                                        | 20,K(Acetyl_K);                                            | 0.00000523 | 113.91 | 1.00 | 2185.20077 | -0.1126  | 3 | Cmpd 1705787, +MSn(729.4), 61.2 min  |
| gijl48661974 | MRA_2173 | UDP-N-acetylmuramoylalanyl-D-glutamate--2,6-diaminopimelate ligase | GQGFLALVDYAHK#PEALR                   | pFind  | 13,K(Acetyl_K);                                        | 396,K(Acetyl_K);                                           | 1.28E-15   | 158.61 | 1.00 | 2026.0636  | -0.13816 | 2 | Cmpd 3105676, +MSn(1014.0), 65.8 min |
|              |          |                                                                    |                                       | mascot | 13,K(Acetyl_K);                                        | 396,K(Acetyl_K);                                           | 61.73      | 163.41 | 1.00 | 2026.06358 | -0.05814 | 2 | Cmpd 3205628, +MSn(1014.0), 65.5 min |
| gijl48661988 | MRA_2187 | hypothetical protein                                               | TTEHRPEILLSFGFVK#VETR                 | pFind  | 17,K(Acetyl_K);                                        | 207,K(Acetyl_K);                                           | 9.33E-12   | 122.72 | 1.00 | 2497.33291 | -0.03474 | 3 | Cmpd 3205596, +MSn(833.4), 65.1 min  |
|              |          |                                                                    |                                       | mascot | 17,K(Acetyl_K);                                        | 207,K(Acetyl_K);                                           | 49.58      | 122.72 | 1.00 | 2497.3329  | -0.03473 | 3 | Cmpd 3205596, +MSn(833.4), 65.1 min  |

|              |          |                                                  |                           |        |                                        |                                            |            |        |      |            |          |   |                                     |
|--------------|----------|--------------------------------------------------|---------------------------|--------|----------------------------------------|--------------------------------------------|------------|--------|------|------------|----------|---|-------------------------------------|
| gijl48662003 | MRA_2202 | long-chain-fatty-acid--CoA ligase                | VFEK#VYNTAEQNAANAGK       | mascot | 4,K(Acetyl_K);                         | 282,K(Acetyl_K);                           | 68.84      | 230.36 | 1.00 | 1994.96973 | -0.11156 | 3 | Cmpd 1605230, +MSn(666.0), 54.4 min |
|              |          |                                                  |                           | pFind  | 4,K(Acetyl_K);                         | 282,K(Acetyl_K);                           | 6.59E-17   | 230.36 | 1.00 | 1994.96976 | -0.11159 | 3 | Cmpd 1605230, +MSn(666.0), 54.4 min |
| gijl48662013 | MRA_2212 | ubiquinol-cytochrome C reductase QcrB            | SVLEHGVETGIHK#R           | mascot | 13,K(Acetyl_K);                        | 456,K(Acetyl_K);                           | 47.33      | 183.50 | 1.00 | 1578.87294 | -0.02749 | 2 | Cmpd 1705264, +MSn(790.4), 55.8 min |
|              |          |                                                  |                           | pFind  | 13,K(Acetyl_K);                        | 456,K(Acetyl_K);                           | 2.58E-17   | 183.50 | 1.00 | 1578.87296 | -0.02752 | 2 | Cmpd 1705264, +MSn(790.4), 55.8 min |
| gijl48662028 | MRA_2227 | glycine cleavage system aminomethyltransferase T | AALLAEK#AAGPR             | pFind  | 7,K(Acetyl_K);                         | 290,K(Acetyl_K);                           | 1.14E-14   | 89.88  | 1.00 | 1208.68772 | -0.00228 | 2 | Cmpd 3203390, +MSn(605.3), 40.1 min |
|              |          |                                                  |                           | mascot | 7,K(Acetyl_K);                         | 290,K(Acetyl_K);                           | 45.95      | 89.88  | 1.00 | 1208.68767 | -0.00222 | 2 | Cmpd 3203390, +MSn(605.3), 40.1 min |
| gijl48662032 | MRA_2231 | dihydrolipoamide acetyltransferase               | FLTITK#HR                 | pFind  | 6,K(Acetyl_K);                         | 539,K(Acetyl_K);                           | 1.85E-08   | 93.69  | 1.00 | 1056.60802 | -0.04258 | 2 | Cmpd 2703125, +MSn(529.3), 37.5 min |
|              |          |                                                  |                           | mascot | 6,K(Acetyl_K);                         | 539,K(Acetyl_K);                           | 32.79      | 93.69  | 1.00 | 1056.608   | -0.04255 | 2 | Cmpd 2703125, +MSn(529.3), 37.5 min |
| gijl48662038 | MRA_2237 | glutamine synthetase                             | TPDDVFK#LAK               | pFind  | 7,K(Acetyl_K);                         | 11,K(Acetyl_K);                            | 2.22E-10   | 150.89 | 1.00 | 1174.62339 | 0.04205  | 2 | Cmpd 1504072, +MSn(588.3), 47.6 min |
|              |          |                                                  |                           | mascot | 7,K(Acetyl_K);                         | 11,K(Acetyl_K);                            | 54.82      | 150.89 | 1.00 | 1174.62338 | 0.042065 | 2 | Cmpd 1504072, +MSn(588.3), 47.6 min |
|              |          |                                                  |                           | pFind  | 6,K(Acetyl_K);                         | 17,K(Acetyl_K);                            | 4.93E-11   | 105.90 | 1.00 | 1604.84098 | -0.07554 | 2 | Cmpd 3003282, +MSn(803.4), 38.8 min |
|              |          |                                                  |                           | mascot | 6,K(Acetyl_K);                         | 17,K(Acetyl_K);                            | 39.83      | 126.13 | 1.00 | 1604.84096 | -0.11551 | 2 | Cmpd 3003291, +MSn(803.4), 38.9 min |
| gijl48662062 | MRA_2261 | pyruvate dehydrogenase subunit E1                | GYALGK#HFEGR              | pFind  | 6,K(Acetyl_K);                         | 399,K(Acetyl_K);                           | 2.87E-12   | 158.61 | 1.00 | 1275.63601 | -0.09057 | 2 | Cmpd 2603230, +MSn(638.8), 38.4 min |
|              |          |                                                  |                           | mascot | 6,K(Acetyl_K);                         | 399,K(Acetyl_K);                           | 47.95      | 158.61 | 1.00 | 1275.636   | -0.09055 | 2 | Cmpd 2603230, +MSn(638.8), 38.4 min |
|              |          |                                                  |                           | pFind  | 3,K(Acetyl_K);                         | 508,K(Acetyl_K);                           | 9.06E-09   | 81.63  | 1.00 | 933.528374 | 0.09707  | 2 | Cmpd 2703565, +MSn(467.8), 42.6 min |
|              |          |                                                  |                           | mascot | 3,K(Acetyl_K);                         | 508,K(Acetyl_K);                           | 33.09      | 81.63  | 1.00 | 933.528351 | 0.097097 | 2 | Cmpd 2703565, +MSn(467.8), 42.6 min |
| gijl48662065 | MRA_2264 | acyl carrier protein                             | TVGDVVAYIQK#LEENPEAAQALR  | mascot | 11,K(Acetyl_K);                        | 79,K(Acetyl_K);                            | 44.22      | 167.38 | 1.00 | 2684.36568 | 1.602495 | 3 | Cmpd 1108994, +MSn(896.3), 96.5 min |
|              |          |                                                  |                           | pFind  | 11,K(Acetyl_K);                        | 79,K(Acetyl_K);                            | 4.5E-09    | 182.51 | 1.00 | 2684.36572 | -0.10755 | 3 | Cmpd 1909042, +MSn(895.8), 95.9 min |
| gijl48662080 | MRA_2279 | transcriptional regulatory protein               | AVK#LMAQAFGASR            | mascot | 3,K(Acetyl_K);                         | 187,K(Acetyl_K);                           | 61.41      | 88.90  | 1.00 | 1390.73908 | 0.086373 | 2 | Cmpd 3204439, +MSn(696.4), 52.0 min |
| gijl48662102 | MRA_2299 | dehydrogenase                                    | ASMPK#FLSTAR              | pFind  | 5,K(Acetyl_K);                         | 354,K(Acetyl_K);                           | 0.00000213 | 138.46 | 1.00 | 1249.64889 | -0.04345 | 2 | Cmpd 3204171, +MSn(625.8), 49.0 min |
|              |          |                                                  |                           | mascot | 5,K(Acetyl_K);                         | 354,K(Acetyl_K);                           | 35.19      | 138.46 | 1.00 | 1249.64887 | -0.04342 | 2 | Cmpd 3204171, +MSn(625.8), 49.0 min |
| gijl48662295 | MRA_2486 | ATP-dependent Clp protease proteolytic subunit   | DTDRDK#ILTAEEAK           | pFind  | 6,K(Acetyl_K);                         | 187,K(Acetyl_K);                           | 8.97E-10   | 174.30 | 1.00 | 1645.8159  | -0.13046 | 2 | Cmpd 1402852, +MSn(823.9), 33.4 min |
|              |          |                                                  |                           | mascot | 6,K(Acetyl_K);                         | 187,K(Acetyl_K);                           | 31.99      | 174.30 | 1.00 | 1645.81586 | -0.13041 | 2 | Cmpd 1402852, +MSn(823.9), 33.4 min |
| gijl48662311 | MRA_2501 | NAD-dependent glutamate dehydrogenase Gdh        | ELEALPSEK#EIAR            | mascot | 9,K(Acetyl_K);                         | 1268,K(Acetyl_K);                          | 34.6       | 91.73  | 1.00 | 1525.79872 | -0.07327 | 2 | Cmpd 1705562, +MSn(763.9), 58.9 min |
|              |          |                                                  |                           | pFind  | 9,K(Acetyl_K);                         | 1268,K(Acetyl_K);                          | 3.88E-12   | 91.73  | 1.00 | 1525.79879 | -0.07335 | 2 | Cmpd 1705562, +MSn(763.9), 58.9 min |
|              |          |                                                  |                           | pFind  | 4,K(Acetyl_K);                         | 180,K(Acetyl_K);                           | 0.00000011 | 100.07 | 1.00 | 1292.78162 | 0.02382  | 2 | Cmpd 2504705, +MSn(647.4), 55.2 min |
|              |          |                                                  |                           | mascot | 4,K(Acetyl_K);                         | 180,K(Acetyl_K);                           | 41.33      | 100.07 | 1.00 | 1292.7816  | 0.023847 | 2 | Cmpd 2504705, +MSn(647.4), 55.2 min |
| gijl48662385 | MRA_2575 | hypothetical protein                             | ELELLDRAAK#ASGASR         | pFind  | 11,K(Acetyl_K);                        | 20,K(Acetyl_K);                            | 0.000196   | 126.36 | 1.00 | 1856.95921 | 0.13896  | 3 | Cmpd 1905989, +MSn(620.0), 70.3 min |
| gijl48662446 | MRA_2634 | pyridoxal biosynthesis lyase PdxS                | ATFFDDPDVLAK#VSR          | pFind  | 13,K(Acetyl_K);                        | 271,K(Acetyl_K);                           | 1.29E-14   | 134.56 | 1.00 | 1822.91013 | -0.10469 | 2 | Cmpd 3205764, +MSn(912.4), 67.0 min |
|              |          |                                                  |                           | mascot | 13,K(Acetyl_K);                        | 271,K(Acetyl_K);                           | 50.92      | 134.56 | 1.00 | 1822.91014 | -0.10469 | 2 | Cmpd 3205764, +MSn(912.4), 67.0 min |
| gijl48662586 | MRA_2770 | hypothetical protein                             | IDEHADPK#VQIQQAIEEAQR     | mascot | 8,K(Acetyl_K);                         | 27,K(Acetyl_K);                            | 50.69      | 154.47 | 1.00 | 2359.17676 | -0.14859 | 3 | Cmpd 1707159, +MSn(787.4), 75.2 min |
|              |          |                                                  |                           | pFind  | 8,K(Acetyl_K);                         | 27,K(Acetyl_K);                            | 3.34E-16   | 154.47 | 1.00 | 2359.17681 | -0.14864 | 3 | Cmpd 1707159, +MSn(787.4), 75.2 min |
|              |          |                                                  |                           | pFind  | 9,K(Acetyl_K);                         | 162,K(Acetyl_K);                           | 1.35E-07   | 158.19 | 1.00 | 2200.15217 | -0.364   | 3 | Cmpd 2304207, +MSn(734.3), 42.6 min |
|              |          |                                                  |                           | mascot | 9,K(Acetyl_K);                         | 162,K(Acetyl_K);                           | 31.94      | 122.92 | 1.00 | 2200.15212 | -0.15394 | 3 | Cmpd 4904604, +MSn(734.3), 54.3 min |
| gijl48662625 | MRA_2807 | polynucleotide phosphorylase                     | IDEIK#TQVVQR              | pFind  | 5,K(Acetyl_K);                         | 306,K(Acetyl_K);                           | 9.13E-11   | 188.67 | 1.00 | 1369.75653 | -0.15109 | 2 | Cmpd 2603232, +MSn(685.8), 38.4 min |
|              |          |                                                  |                           | mascot | 5,K(Acetyl_K);                         | 306,K(Acetyl_K);                           | 53.57      | 158.61 | 1.00 | 1369.75652 | -0.05107 | 2 | Cmpd 2703257, +MSn(685.9), 39.0 min |
|              |          |                                                  |                           | pFind  | 8,K(Acetyl_K);                         | 726,K(Acetyl_K);                           | 1.92E-15   | 118.26 | 1.00 | 1099.58734 | 0.0381   | 2 | Cmpd 2703334, +MSn(550.8), 39.9 min |
|              |          |                                                  |                           | mascot | 8,K(Acetyl_K);                         | 726,K(Acetyl_K);                           | 52.03      | 118.26 | 1.00 | 1099.58731 | 0.038137 | 2 | Cmpd 2703334, +MSn(550.8), 39.9 min |
| gijl48662726 | MRA_2907 | ribosome recycling factor                        | TTHQYVTQIDELVK#HK         | pFind  | 14,K(Acetyl_K);                        | 176,K(Acetyl_K);                           | 0.0000129  | 138.46 | 1.00 | 1981.02688 | 0.21129  | 3 | Cmpd 1705983, +MSn(661.4), 63.2 min |
|              |          |                                                  |                           | pFind  | 5,K(Acetyl_K);                         | 68,K(Acetyl_K);                            | 2.84E-11   | 55.28  | 1.00 | 1583.90352 | -0.11808 | 2 | Cmpd 3204552, +MSn(792.9), 53.3 min |
|              |          |                                                  |                           | pFind  | 3,K(Acetyl_K);                         | 158,K(Acetyl_K);                           | 0.0000177  | 108.77 | 1.00 | 859.428714 | -0.05599 | 1 | Cmpd 1101908, +MSn(860.4), 22.6 min |
|              |          |                                                  |                           | pFind  | 14,K(Acetyl_K);                        | 158,K(Acetyl_K);                           | 0.00000349 | 298.94 | 1.00 | 1987.89706 | -0.13162 | 2 | Cmpd 1103125, +MSn(994.9), 36.9 min |
|              |          |                                                  |                           | mascot | 14,K(Acetyl_K);                        | 158,K(Acetyl_K);                           | 62.4       | 298.94 | 1.00 | 1987.89702 | -0.13157 | 2 | Cmpd 1103125, +MSn(994.9), 36.9 min |
|              |          |                                                  |                           | mascot | 11,K(Acetyl_K);                        | 12,K(Acetyl_K);                            | 53.8       | 198.81 | 1.00 | 1708.78651 | -0.10107 | 2 | Cmpd 1706658, +MSn(855.3), 70.0 min |
| gijl48662733 | MRA_2914 | elongation factor Ts                             | AEGKPEQALPK#IVEGR         | pFind  | 11,K(Acetyl_K);                        | 221,K(Acetyl_K);                           | 1.28E-12   | 223.61 | 1.00 | 1762.95775 | -0.05231 | 2 | Cmpd 3203638, +MSn(882.5), 42.9 min |
|              |          |                                                  |                           | mascot | 11,K(Acetyl_K);                        | 221,K(Acetyl_K);                           | 60.96      | 223.61 | 1.00 | 1762.9577  | -0.05226 | 2 | Cmpd 3203638, +MSn(882.5), 42.9 min |
| gijl48662734 | MRA_2915 | 30S ribosomal protein S2                         | AVVTMK#QLLDSGTHFGHQTR     | pFind  | 6,K(Acetyl_K);                         | 7,K(Acetyl_K);                             | 6.12E-07   | 122.16 | 1.00 | 2267.14809 | -0.00992 | 3 | Cmpd 3204982, +MSn(756.7), 58.2 min |
|              |          |                                                  |                           | mascot | 6,K(Acetyl_K);                         | 7,K(Acetyl_K);                             | 51.28      | 122.16 | 1.00 | 2267.1481  | -0.00993 | 3 | Cmpd 3204982, +MSn(756.7), 58.2 min |
|              |          |                                                  |                           | pFind  | 14,K(Acetyl_K);                        | 109,K(Acetyl_K);                           | 0.00000012 | 166.42 | 1.00 | 1787.91411 | -0.10867 | 2 | Cmpd 3205203, +MSn(894.9), 60.7 min |
|              |          |                                                  |                           | mascot | 14,K(Acetyl_K);                        | 109,K(Acetyl_K);                           | 36.02      | 166.42 | 1.00 | 1787.91411 | -0.10866 | 2 | Cmpd 3205203, +MSn(894.9), 60.7 min |
| gijl48662753 | MRA_2934 | 30S ribosomal protein S16                        | LEVFNAAALAAADGGPTTEATK#PK | pFind  | 21,K(Acetyl_K);                        | 123,K(Acetyl_K);                           | 6.9E-08    | 111.19 | 1.00 | 2313.18525 | -0.32708 | 3 | Cmpd 905055, +MSn(772.0), 48.9 min  |
|              |          |                                                  |                           | mascot | 21,K(Acetyl_K);                        | 123,K(Acetyl_K);                           | 39.17      | 202.26 | 1.00 | 2313.18521 | -0.32704 | 3 | Cmpd 1604994, +MSn(772.0), 48.6 min |
| gijl48662787 | MRA_2967 | acyl-CoA synthetase                              | LVAIHELK#K                | mascot | 8,K(Acetyl_K);                         | 510,K(Acetyl_K);                           | 34.26      | 58.12  | 1.00 | 1067.69539 | 0.090059 | 2 | Cmpd 3004704, +MSn(534.9), 55.1 min |
|              |          |                                                  |                           | pFind  | 8,K(Acetyl_K);                         | 510,K(Acetyl_K);                           | 6.97E-15   | 58.12  | 1.00 | 1067.69543 | 0.09001  | 2 | Cmpd 3004704, +MSn(534.9), 55.1 min |
| gijl48662825 | MRA_3004 | 50S ribosomal protein L28                        | LNVCTSCIK#AGK             | pFind  | 9,K(Acetyl_K);                         | 57,K(Acetyl_K);                            | 0.00000195 | 58.12  | 1.00 | 1391.6901  | -0.00466 | 2 | Cmpd 2306374, +MSn(696.8), 64.2 min |
| gijl48662842 | MRA_3021 | glutamyl-tRNA synthetase                         | FFNDQYVIDPK#AAAK          | mascot | 12,K(Acetyl_K);                        | 396,K(Acetyl_K);                           | 38.66      | 106.41 | 1.00 | 1882.91011 | -0.10466 | 2 | Cmpd 1706567, +MSn(942.4), 69.1 min |
|              |          |                                                  |                           | pFind  | 12,K(Acetyl_K);                        | 396,K(Acetyl_K);                           | 2.17E-11   | 106.41 | 1.00 | 1882.91012 | -0.10468 | 2 | Cmpd 1706567, +MSn(942.4), 69.1 min |
| gijl48662852 | MRA_3031 | ketol-acid reductoisomerase                      | EIQDGSFVHK#LVADVEGGNK     | mascot | 10,K(Acetyl_K);                        | 287,K(Acetyl_K);                           | 50.34      | 296.08 | 1.00 | 2183.08586 | 0.022311 | 3 | Cmpd 1907726, +MSn(728.7), 81.7 min |
|              |          |                                                  |                           | pFind  | 10,K(Acetyl_K);                        | 287,K(Acetyl_K);                           | 5.57E-13   | 296.08 | 1.00 | 2183.08586 | 0.02231  | 3 | Cmpd 1907726, +MSn(728.7), 81.7 min |
| gijl48662881 | MRA_3060 | electron transfer flavoprotein subunit beta      | FPSFK#GIMAAK              | pFind  | 5,K(Acetyl_K);                         | 197,K(Acetyl_K);                           | 1.27E-18   | 214.19 | 1.00 | 1237.65292 | -0.00748 | 2 | Cmpd 4904537, +MSn(619.8), 53.6 min |
|              |          |                                                  |                           | mascot | 5,K(Acetyl_K);                         | 197,K(Acetyl_K);                           | 55.43      | 214.19 | 1.00 | 1237.65289 | -0.00745 | 2 | Cmpd 4904537, +MSn(619.8), 53.6 min |
|              |          |                                                  |                           | mascot | 5,K(Acetyl_K);8,M(Oxidation_M_15.995); | 197,K(Acetyl_K);200,M(Oxidation_M_15.995); | 63.58      | 138.46 | 1.00 | 1253.64781 | -0.00236 | 2 | Cmpd 3204359, +MSn(627.8), 51.1 min |
| gijl48662940 | MRA_3118 | zinc-type alcohol dehydrogenase AdhD             | ETALK#FGATHAFADAASAAK     | mascot | 5,K(Acetyl_K);                         | 227,K(Acetyl_K);                           | 45.55      | 222.28 | 1.00 | 2090.04323 | -0.05506 | 3 | Cmpd 1706711, +MSn(697.7), 70.6 min |

|              |           |                                                                            |                               |        |                                        |                                          |                |                |                |                |                |                |                                      |                |
|--------------|-----------|----------------------------------------------------------------------------|-------------------------------|--------|----------------------------------------|------------------------------------------|----------------|----------------|----------------|----------------|----------------|----------------|--------------------------------------|----------------|
|              |           |                                                                            |                               | pFind  | 5,K(Acetyl_K);                         | 227,K(Acetyl_K);                         | 9.33E-09       | 222.28         | 1.00           | 2090.04327     | -0.0551        | 3              | Cmpd 1706711, +MSn(697.7), 70.6 min  |                |
| gijl48662971 | MRA_3149  | thiosulfate sulfurtransferase CysA3                                        | AANEDGTFK#SDEELAK             | mascot | 9,K(Acetyl_K);                         | 209,K(Acetyl_K);                         | 62.2           | 146.32         | 1.00           | 1765.8006      | -0.11515       | 2              | Cmpd 1303184, +MSn(883.9), 37.0 min  |                |
|              |           |                                                                            |                               | pFind  | 9,K(Acetyl_K);                         | 209,K(Acetyl_K);                         | 4.41E-15       | 150.97         | 1.00           | 1765.80064     | -0.1352        | 2              | Cmpd 1303164, +MSn(883.8), 36.7 min  |                |
|              |           |                                                                            |                               | mascot | 7,K(Acetyl_K);                         | 216,K(Acetyl_K);                         | 56.69          | 194.31         | 1.00           | 1979.93233     | -0.18688       | 2              | Cmpd 1705234, +MSn(990.9), 60.7 min  |                |
|              |           |                                                                            |                               | pFind  | 7,K(Acetyl_K);                         | 216,K(Acetyl_K);                         | 7.75E-15       | 194.31         | 1.00           | 1979.93237     | -0.18693       | 2              | Cmpd 1705234, +MSn(990.9), 60.7 min  |                |
| gijl48662987 | MRA_3165  | two component transcriptional regulatory protein DevR                      | MFLAEKTVK#NYVSR               | pFind  | 9,K(Acetyl_K);                         | 182,K(Acetyl_K);                         | 0.00000444     | 129.56         | 1.00           | 1726.90762     | 0.32055        | 3              | Cmpd 1806340, +MSn(576.8), 73.6 min  |                |
| gijl48662995 | MRA_3173  | acyl-CoA dehydrogenase                                                     | SVLTGAGVEISYDK#PSHTQSAAAAEFLR | mascot | 14,K(Acetyl_K);                        | 288,K(Acetyl_K);                         | 83.53          | 254.09         | 1.00           | 2946.47229     | -0.22412       | 3              | Cmpd 1906841, +MSn(983.1), 72.3 min  |                |
|              |           |                                                                            |                               | pFind  | 14,K(Acetyl_K);                        | 288,K(Acetyl_K);                         | 7.78E-17       | 254.09         | 1.00           | 2946.47231     | -0.22414       | 3              | Cmpd 1906841, +MSn(983.1), 72.3 min  |                |
| gijl48663007 | MRA_3185  | NADH dehydrogenase subunit H                                               | YDQFMALGWK#                   | pFind  | 10,K(Acetyl_K);                        | 321,K(Acetyl_K);                         | 3.39E-10       | 19.15          | 1.00           | 1299.59579     | 0.14965        | 2              | Cmpd 1904040, +MSn(650.9), 48.4 min  |                |
| gijl48663076 | MRA_3254  | isochorismate synthase EntC                                                | AADPK#LDAANAAALASSAK          | pFind  | 5,K(Acetyl_K);                         | 201,K(Acetyl_K);                         | 4.63E-16       | 202.26         | 1.00           | 1796.92684     | -0.0214        | 2              | Cmpd 3204216, +MSn(899.5), 49.5 min  |                |
|              |           |                                                                            |                               | mascot | 5,K(Acetyl_K);                         | 201,K(Acetyl_K);                         | 49.58          | 202.26         | 1.00           | 1796.92677     | -0.02133       | 2              | Cmpd 3204216, +MSn(899.5), 49.5 min  |                |
| gijl48663086 | MRA_3264  | short chain dehydrogenase                                                  | TAEPHPK#LPGTVFTAACK           | pFind  | 7,K(Acetyl_K);                         | 44,K(Acetyl_K);                          | 1.98E-08       | 202.26         | 1.00           | 1805.96759     | -0.12215       | 2              | Cmpd 3204018, +MSn(903.9), 47.2 min  |                |
|              |           |                                                                            |                               | mascot | 7,K(Acetyl_K);                         | 44,K(Acetyl_K);                          | 45.5           | 202.26         | 1.00           | 1805.96758     | -0.12213       | 2              | Cmpd 3204018, +MSn(903.9), 47.2 min  |                |
|              |           |                                                                            |                               | pFind  | 10,K(Acetyl_K);                        | 37,K(Acetyl_K);                          | 7.14E-17       | 236.10         | 1.00           | 1786.95775     | -0.23231       | 2              | Cmpd 2101257, +MSn(894.4), 49.2 min  |                |
|              |           |                                                                            |                               | mascot | 10,K(Acetyl_K);                        | 37,K(Acetyl_K);                          | 71.12          | 236.10         | 1.00           | 1786.95777     | -0.23226       | 2              | Cmpd 2101257, +MSn(894.4), 49.2 min  |                |
|              |           |                                                                            |                               | mascot | 10,K(Acetyl_K);27,K(Acetyl_K);         | 37,K(Acetyl_K);54,K(Acetyl_K);           | 58.11          | 368.98         | 1.00           | 2814.52794     | -0.18977       | 3              | Cmpd 1705874, +MSn(939.1), 67.9 min  |                |
|              |           |                                                                            |                               | pFind  | 10,K(Acetyl_K);27,K(Acetyl_K);         | 37,K(Acetyl_K);54,K(Acetyl_K);           | 9.14E-12       | 368.98         | 1.00           | 2814.52799     | -0.18982       | 3              | Cmpd 1705874, +MSn(939.1), 67.9 min  |                |
| gijl48663109 | MRA_3287  | two component sensory transduction transcriptional regulatory protein MtrA | VEK#DPENPTVLTVR               | pFind  | 3,K(Acetyl_K);                         | 207,K(Acetyl_K);                         | 4.6E-22        | 134.56         | 1.00           | 1736.93087     | -0.12543       | 2              | Cmpd 1504138, +MSn(869.4), 48.4 min  |                |
|              |           |                                                                            |                               | mascot | 3,K(Acetyl_K);                         | 207,K(Acetyl_K);                         | 50.31          | 134.56         | 1.00           | 1736.93086     | -0.12541       | 2              | Cmpd 1504138, +MSn(869.4), 48.4 min  |                |
| gijl48663111 | MRA_3289  | S-adenosyl-L-homocysteine hydrolase                                        | DIIMLEHIK#AMK                 | mascot | 9,K(Acetyl_K);                         | 350,K(Acetyl_K);                         | 41.52          | 158.61         | 1.00           | 1482.79379     | -0.10835       | 2              | Cmpd 1906898, +MSn(742.4), 72.9 min  |                |
|              |           |                                                                            |                               | pFind  | 9,K(Acetyl_K);                         | 350,K(Acetyl_K);                         | 2.4E-21        | 158.61         | 1.00           | 1482.79384     | -0.1084        | 2              | Cmpd 1906898, +MSn(742.4), 72.9 min  |                |
| gijl48663137 | MRA_3315  | acyl-CoA dehydrogenase                                                     | ELAPHAEEVDEK#AR               | pFind  | 12,K(Acetyl_K);                        | 44,K(Acetyl_K);                          | 1.93E-08       | 227.03         | 1.00           | 1576.78454     | -0.0791        | 2              | Cmpd 3202644, +MSn(789.4), 31.5 min  |                |
|              |           |                                                                            |                               | mascot | 12,K(Acetyl_K);                        | 44,K(Acetyl_K);                          | 43.65          | 227.03         | 1.00           | 1576.78449     | -0.07904       | 2              | Cmpd 3202644, +MSn(789.4), 31.5 min  |                |
| gijl48663251 | MRA_3428A | hypothetical protein                                                       | FTK#PVFPGETLSTVIWR            | pFind  | 3,K(Acetyl_K);                         | 242,K(Acetyl_K);                         | 1.14E-10       | 238.91         | 1.00           | 2019.08295     | -0.17751       | 2              | Cmpd 3206605, +MSn(1010.5), 76.7 min |                |
|              |           |                                                                            |                               | mascot | 3,K(Acetyl_K);                         | 242,K(Acetyl_K);                         | 31.48          | 238.91         | 1.00           | 2019.08296     | -0.17751       | 2              | Cmpd 3206605, +MSn(1010.5), 76.7 min |                |
| gijl48663281 | MRA_0445  | molecular chaperone GroEL                                                  | LAK#LAGGVAVIK                 | pFind  | 3,K(Acetyl_K);                         | 369,K(Acetyl_K);                         | 1.49E-18       | 113.91         | 1.00           | 1180.75435     | 0.09109        | 2              | Cmpd 2803954, +MSn(591.4), 47.1 min  |                |
|              |           |                                                                            |                               | mascot | 3,K(Acetyl_K);                         | 369,K(Acetyl_K);                         | 55.56          | 113.91         | 1.00           | 1180.75432     | 0.09113        | 2              | Cmpd 2803954, +MSn(591.4), 47.1 min  |                |
| gijl48663282 | MRA_3458  | co-chaperonin GroES                                                        | IPLDVAEGDTVIYSK#YGGTEIK       | pFind  | 15,K(Acetyl_K);                        | 73,K(Acetyl_K);                          | 5.04E-11       | 224.79         | 1.00           | 2409.23151     | -0.28334       | 3              | Cmpd 2101769, +MSn(804.0), 68.3 min  |                |
|              |           |                                                                            |                               | mascot | 15,K(Acetyl_K);                        | 73,K(Acetyl_K);                          | 42.23          | 224.79         | 1.00           | 2409.23151     | -0.28333       | 3              | Cmpd 2101769, +MSn(804.0), 68.3 min  |                |
|              |           |                                                                            |                               | pFind  | 16,K(Acetyl_K);                        | 73,K(Acetyl_K);                          | 2.57E-10       | 222.29         | 1.00           | 2565.33262     | -0.14445       | 3              | Cmpd 1805383, +MSn(856.1), 62.7 min  |                |
|              |           |                                                                            |                               | mascot | 16,K(Acetyl_K);                        | 73,K(Acetyl_K);                          | 49.74          | 222.29         | 1.00           | 2565.33261     | -0.14444       | 3              | Cmpd 1805383, +MSn(856.1), 62.7 min  |                |
|              |           |                                                                            |                               | pFind  | 7,K(Acetyl_K);                         | 80,K(Acetyl_K);                          | 3.96E-09       | 268.62         | 1.00           | 2217.09534     | -0.35717       | 3              | Cmpd 3605138, +MSn(739.9), 50.4 min  |                |
|              |           |                                                                            |                               | mascot | 7,K(Acetyl_K);                         | 80,K(Acetyl_K);                          | 26.39          | 268.62         | 1.00           | 2217.09531     | -0.35713       | 3              | Cmpd 3605138, +MSn(739.9), 50.4 min  |                |
| gijl48663322 | MRA_3498  | DNA-directed RNA polymerase subunit alpha                                  | SYNCLK#R                      | pFind  | 4,K(Acetyl_K);                         | 7,K(Acetyl_K);                           | 7,K(Acetyl_K); | 7,K(Acetyl_K); | 7,K(Acetyl_K); | 7,K(Acetyl_K); | 7,K(Acetyl_K); | 7,K(Acetyl_K); | 7,K(Acetyl_K);                       | 7,K(Acetyl_K); |
|              |           |                                                                            |                               | mascot | 4,K(Acetyl_K);                         | 7,K(Acetyl_K);                           | 7,K(Acetyl_K); | 7,K(Acetyl_K); | 7,K(Acetyl_K); | 7,K(Acetyl_K); | 7,K(Acetyl_K); | 7,K(Acetyl_K); | 7,K(Acetyl_K);                       | 7,K(Acetyl_K); |
| gijl48663323 | MRA_3499  | 30S ribosomal protein S4                                                   | TGEELLK#ILES                  | pFind  | 7,K(Acetyl_K);                         | 87,K(Acetyl_K);                          | 60.6           | 178.19         | 1.00           | 1428.78236     | 0.063084       | 2              | Cmpd 1907751, +MSn(715.4), 81.9 min  |                |
|              |           |                                                                            |                               | mascot | 7,K(Acetyl_K);                         | 87,K(Acetyl_K);                          | 9.15E-13       | 178.19         | 1.00           | 1428.78241     | 0.06303        | 2              | Cmpd 1907751, +MSn(715.4), 81.9 min  |                |
| gijl48663419 | MRA_3595  | acetyl-CoA acetyltransferase                                               | GSELIAEK#WNLSR                | pFind  | 8,K(Acetyl_K);                         | 167,K(Acetyl_K);                         | 3.3E-15        | 176.01         | 1.00           | 1543.79946     | -0.07402       | 2              | Cmpd 3204908, +MSn(772.9), 57.3 min  |                |
|              |           |                                                                            |                               | mascot | 8,K(Acetyl_K);                         | 167,K(Acetyl_K);                         | 45.75          | 176.01         | 1.00           | 1543.79941     | -0.07396       | 2              | Cmpd 3204908, +MSn(772.9), 57.3 min  |                |
| gijl48663433 | MRA_3608  | 2-hydroxy-6-phenylhexa-2,4-dienoic acid hydrolase                          | LSK#FSVAPTR                   | pFind  | 3,K(Acetyl_K);                         | 160,K(Acetyl_K);                         | 9.48E-15       | 142.08         | 1.00           | 1146.63971     | 0.02573        | 2              | Cmpd 3203487, +MSn(574.3), 41.2 min  |                |
|              |           |                                                                            |                               | mascot | 3,K(Acetyl_K);                         | 160,K(Acetyl_K);                         | 54.76          | 142.08         | 1.00           | 1146.63969     | 0.025754       | 2              | Cmpd 3203487, +MSn(574.3), 41.2 min  |                |
| gijl48663444 | MRA_3619  | cysteinyl-tRNA synthetase                                                  | NVTDIEDK#ILAK                 | mascot | 8,K(Acetyl_K);                         | 78,K(Acetyl_K);                          | 59.71          | 166.42         | 1.00           | 1399.75583     | 0.009619       | 2              | Cmpd 1706719, +MSn(700.9), 70.7 min  |                |
|              |           |                                                                            |                               | pFind  | 8,K(Acetyl_K);                         | 78,K(Acetyl_K);                          | 2.34E-18       | 166.42         | 1.00           | 1399.75586     | 0.00958        | 2              | Cmpd 1706719, +MSn(700.9), 70.7 min  |                |
| gijl48663456 | MRA_3631  | hypothetical protein                                                       | INAIEVPAGAGPELEK#R            | pFind  | 16,K(Acetyl_K);                        | 21,K(Acetyl_K);                          | 1.93E-13       | 196.05         | 1.00           | 1804.96831     | -0.14287       | 2              | Cmpd 1504229, +MSn(903.4), 49.4 min  |                |
|              |           |                                                                            |                               | mascot | 16,K(Acetyl_K);                        | 21,K(Acetyl_K);                          | 48.38          | 196.05         | 1.00           | 1804.96826     | -0.14281       | 2              | Cmpd 1504229, +MSn(903.4), 49.4 min  |                |
| gijl48663491 | MRA_3664  | inorganic pyrophosphatase                                                  | DLEPGK#FVK                    | pFind  | 6,K(Acetyl_K);                         | 133,K(Acetyl_K);                         | 5.23E-07       | 135.86         | 1.00           | 1073.57571     | -0.11027       | 2              | Cmpd 903163, +MSn(537.7), 30.6 min   |                |
|              |           |                                                                            |                               | pFind  | 2,K(Acetyl_K);                         | 16,K(Acetyl_K);                          | 2.82E-18       | 136.26         | 1.00           | 1388.63205     | -0.18661       | 2              | Cmpd 601358, +MSn(695.2), 13.3 min   |                |
|              |           |                                                                            |                               | mascot | 2,K(Acetyl_K);                         | 16,K(Acetyl_K);                          | 58.84          | 136.26         | 1.00           | 1388.63203     | -0.18659       | 2              | Cmpd 601358, +MSn(695.2), 13.3 min   |                |
|              |           |                                                                            |                               | mascot | 7,K(Acetyl_K);                         | 127,K(Acetyl_K);                         | 41.18          | 201.40         | 1.00           | 1657.82527     | -0.07982       | 2              | Cmpd 1805426, +MSn(829.9), 57.5 min  |                |
| gijl48663558 | MRA_3730  | hypothetical protein                                                       | SVGK#IVM#GLRVVSDGGPER         | pFind  | 7,K(Acetyl_K);                         | 127,K(Acetyl_K);                         | 1.54E-12       | 201.40         | 1.00           | 1657.82527     | -0.07983       | 2              | Cmpd 1805426, +MSn(829.9), 57.5 min  |                |
|              |           |                                                                            |                               | pFind  | 4,K(Acetyl_K);7,M(Oxidation_M_15.995); | 86,K(Acetyl_K);89,M(Oxidation_M_15.995); | 3.99E-07       | 111.42         | 1.00           | 2128.09465     | -0.06648       | 3              | Cmpd 4603391, +MSn(710.3), 39.6 min  |                |
| gijl48663642 | MRA_3814  | enoyl-CoA hydratase                                                        | YASADAK#FSVR                  | pFind  | 7,K(Acetyl_K);                         | 142,K(Acetyl_K);                         | 9.73E-16       | 191.11         | 1.00           | 1255.61969     | -0.03425       | 2              | Cmpd 4902528, +MSn(628.8), 30.2 min  |                |
|              |           |                                                                            |                               | mascot | 7,K(Acetyl_K);                         | 142,K(Acetyl_K);                         | 77.85          | 191.11         | 1.00           | 1255.61968     | -0.03423       | 2              | Cmpd 4902528, +MSn(628.8), 30.2 min  |                |
| gijl48663668 | MRA_3840  | polyketide synthase                                                        | DVVEK#EPEPEPEPK               | pFind  | 5,K(Acetyl_K);                         | 550,K(Acetyl_K);                         | 4.81E-18       | 116.70         | 1.00           | 1662.79885     | -0.11341       | 2              | Cmpd 1102734, +MSn(832.3), 32.4 min  |                |
|              |           |                                                                            |                               | mascot | 5,K(Acetyl_K);                         | 550,K(Acetyl_K);                         | 42.26          | 116.70         | 1.00           | 1662.79881     | -0.11337       | 2              | Cmpd 1102734, +MSn(832.3), 32.4 min  |                |
|              |           |                                                                            |                               | pFind  | 9,K(Acetyl_K);                         | 1300,K(Acetyl_K);                        | 0.00000573     | 100.07         | 1.00           | 2217.10658     | -0.30841       | 3              | Cmpd 2907437, +MSn(739.9), 74.2 min  |                |
| gijl48663669 | MRA_3841  | long-chain-fatty-acid--CoA ligase                                          | HVEK#WAK                      | pFind  | 4,K(Acetyl_K);                         | 35,K(Acetyl_K);                          | 0.0000223      | 90.19          | 1.00           | 938.497404     | -0.01196       | 2              | Cmpd 2802280, +MSn(470.2), 27.9 min  |                |
|              |           |                                                                            |                               | mascot | 12,K(Acetyl_K);                        | 83,K(Acetyl_K);                          | 54.88          | 182.22         | 1.00           | 1911.8414      | -0.15595       | 2              | Cmpd 1706388, +MSn(956.9), 67.3 min  |                |
| gijl48663717 | MRA_3889  | hypothetical protein                                                       | AAYFTDDEYYEK#LDK              | pFind  | 12,K(Acetyl_K);                        | 83,K(Acetyl_K);                          | 8.9E-14        | 201.40         | 1.00           | 1911.84142     | -0.09598       | 2              | Cmpd 1706404, +MSn(956.9), 67.4 min  |                |
|              |           |                                                                            |                               | pFind  | 12,K(Acetyl_K);                        | 83,K(Acetyl_K);                          | 8.9E-14        | 201.40         | 1.00           | 1911.84142     | -0.09598       | 2              | Cmpd 1706404, +MSn(956.9), 67.4 min  |                |
| gijl48663732 | MRA_3904  | hypothetical protein                                                       | ADDGLAGVIDK#IFG               | pFind  | 11,K(Acetyl_K);                        | 100,K(Acetyl_K);                         | 5.61E-12       | 126.13         | 1.00           | 1431.72456     | -0.31912       | 2              | Cmpd 2908951, +MSn(716.7), 89.1 min  |                |
