# Supplementary material
Source: PubMed Central journal article supplement (PMC4256489)
Supplement: supp_M114.041962_mcp.M114.041962-5.pdf [file supp_M114.041962_mcp.M114.041962-5.pdf]

**Supplementary Table S3. Classification of acetylated proteins according to their biological process, molecular function and cellular localization.**

| Biological Process |                                                                            |            |                                               |
|--------------------|----------------------------------------------------------------------------|------------|-----------------------------------------------|
| Protein_ID         | Description                                                                | GO_ID      | GO_Term                                       |
| gij148660799       | ribose-phosphate pyrophosphokinase                                         | GO:0071840 | cellular component organization or biogenesis |
| gij148661845       | antigen Hsp20                                                              | GO:0071840 | cellular component organization or biogenesis |
| gij148662038       | glutamine synthetase                                                       | GO:0071840 | cellular component organization or biogenesis |
| gij148663281       | molecular chaperone GroEL                                                  | GO:0071840 | cellular component organization or biogenesis |
| gij148663282       | co-chaperonin GroES                                                        | GO:0071840 | cellular component organization or biogenesis |
| gij148663668       | polyketide synthase                                                        | GO:0071840 | cellular component organization or biogenesis |
| gij148661961       | hypothetical protein                                                       | GO:0071840 | cellular component organization or biogenesis |
| gij148661974       | UDP-N-acetylmuramoylalanyl-D-glutamate--2,6-diaminopimelate ligase         | GO:0071840 | cellular component organization or biogenesis |
| gij148661325       | acyl-CoA synthetase                                                        | GO:0071840 | cellular component organization or biogenesis |
| gij148662787       | acyl-CoA synthetase                                                        | GO:0071840 | cellular component organization or biogenesis |
| gij148663669       | long-chain-fatty-acid--CoA ligase                                          | GO:0071840 | cellular component organization or biogenesis |
| gij148660410       | (3R)-hydroxyacyl-ACP dehydratase subunit HadB                              | GO:0071840 | cellular component organization or biogenesis |
| gij148660416       | methoxy mycolic acid synthase 4                                            | GO:0071840 | cellular component organization or biogenesis |
| gij148661276       | 3-oxoacyl-ACP reductase                                                    | GO:0071840 | cellular component organization or biogenesis |
| gij148662726       | ribosome recycling factor                                                  | GO:0071840 | cellular component organization or biogenesis |
| gij148660129       | fructose-bisphosphate aldolase                                             | GO:0071840 | cellular component organization or biogenesis |
| gij148663111       | S-adenosyl-L-homocysteine hydrolase                                        | GO:0071840 | cellular component organization or biogenesis |
| gij148660988       | tetrahydrodipicolinate N-succinyltransferase                               | GO:0071840 | cellular component organization or biogenesis |
| gij148661325       | acyl-CoA synthetase                                                        | GO:0002376 | immune system process                         |
| gij148662787       | acyl-CoA synthetase                                                        | GO:0002376 | immune system process                         |
| gij148660988       | tetrahydrodipicolinate N-succinyltransferase                               | GO:0008152 | metabolic process                             |
| gij148662852       | ketol-acid reductoisomerase                                                | GO:0008152 | metabolic process                             |
| gij148661183       | S-adenosylmethionine synthetase                                            | GO:0008152 | metabolic process                             |
| gij148663111       | S-adenosyl-L-homocysteine hydrolase                                        | GO:0008152 | metabolic process                             |
| gij148663433       | 2-hydroxy-6-phenylhexa-2,4-dienoic acid hydrolase                          | GO:0008152 | metabolic process                             |
| gij148659975       | phosphoenolpyruvate carboxykinase                                          | GO:0008152 | metabolic process                             |
| gij148660799       | ribose-phosphate pyrophosphokinase                                         | GO:0008152 | metabolic process                             |
| gij148661955       | hypothetical protein                                                       | GO:0008152 | metabolic process                             |
| gij148660947       | pterin-4-alpha-carbinolamine dehydratase                                   | GO:0008152 | metabolic process                             |
| gij148662028       | glycine cleavage system aminomethyltransferase T                           | GO:0008152 | metabolic process                             |
| gij148662987       | two component transcriptional regulatory protein DevR                      | GO:0008152 | metabolic process                             |
| gij148663109       | two component sensory transduction transcriptional regulatory protein MtrA | GO:0008152 | metabolic process                             |
| gij148659912       | short-chain type dehydrogenase/reductase                                   | GO:0008152 | metabolic process                             |
| gij148659921       | NAD(P) transhydrogenase subunit beta                                       | GO:0008152 | metabolic process                             |
| gij148659995       | acyl-CoA dehydrogenase                                                     | GO:0008152 | metabolic process                             |
| gij148660007       | 3-ketoacyl-ACP reductase                                                   | GO:0008152 | metabolic process                             |
| gij148660009       | acyl-CoA dehydrogenase                                                     | GO:0008152 | metabolic process                             |
| gij148660036       | acyl-CoA dehydrogenase                                                     | GO:0008152 | metabolic process                             |
| gij148660104       | iron-sulfur-binding reductase                                              | GO:0008152 | metabolic process                             |
| gij148660172       | f420-dependent glucose-6-phosphate dehydrogenase Fgd1                      | GO:0008152 | metabolic process                             |
| gij148660204       | short chain dehydrogenase                                                  | GO:0008152 | metabolic process                             |
| gij148660228       | dihydroipoamide dehydrogenase                                              | GO:0008152 | metabolic process                             |
| gij148660410       | (3R)-hydroxyacyl-ACP dehydratase subunit HadB                              | GO:0008152 | metabolic process                             |
| gij148660460       | elongation factor Tu                                                       | GO:0008152 | metabolic process                             |
| gij148660529       | MmsA                                                                       | GO:0008152 | metabolic process                             |
| gij148660593       | thiosulfate sulfurtransferase CysA2                                        | GO:0008152 | metabolic process                             |
| gij148660602       | fatty acid desaturase                                                      | GO:0008152 | metabolic process                             |
| gij148660637       | fatty oxidation complex subunit alpha                                      | GO:0008152 | metabolic process                             |
| gij148661113       | thioredoxin-related protein                                                | GO:0008152 | metabolic process                             |
| gij148661276       | 3-oxoacyl-ACP reductase                                                    | GO:0008152 | metabolic process                             |
| gij148661329       | hypothetical protein                                                       | GO:0008152 | metabolic process                             |
| gij148661530       | hypothetical protein                                                       | GO:0008152 | metabolic process                             |
| gij148661816       | 20-beta-hydroxysteroid dehydrogenase FabG3                                 | GO:0008152 | metabolic process                             |
| gij148662062       | pyruvate dehydrogenase subunit E1                                          | GO:0008152 | metabolic process                             |
| gij148662102       | dehydrogenase                                                              | GO:0008152 | metabolic process                             |
| gij148662311       | NAD-dependent glutamate dehydrogenase Gdh                                  | GO:0008152 | metabolic process                             |
| gij148662940       | zinc-type alcohol dehydrogenase AdhD                                       | GO:0008152 | metabolic process                             |
| gij148662971       | thiosulfate sulfurtransferase CysA3                                        | GO:0008152 | metabolic process                             |
| gij148662995       | acyl-CoA dehydrogenase                                                     | GO:0008152 | metabolic process                             |
| gij148663007       | NADH dehydrogenase subunit H                                               | GO:0008152 | metabolic process                             |
| gij148663086       | short chain dehydrogenase                                                  | GO:0008152 | metabolic process                             |
| gij148663137       | acyl-CoA dehydrogenase                                                     | GO:0008152 | metabolic process                             |
| gij148663251       | hypothetical protein                                                       | GO:0008152 | metabolic process                             |
| gij148659759       | DNA polymerase III subunit beta                                            | GO:0008152 | metabolic process                             |
| gij148660118       | molecular chaperone DnaJ                                                   | GO:0008152 | metabolic process                             |
| gij148663281       | molecular chaperone GroEL                                                  | GO:0008152 | metabolic process                             |
| gij148662038       | glutamine synthetase                                                       | GO:0008152 | metabolic process                             |
| gij148662065       | acyl carrier protein                                                       | GO:0008152 | metabolic process                             |
| gij148661422       | lipid-transfer protein                                                     | GO:0008152 | metabolic process                             |
| gij148662003       | long-chain-fatty-acid--CoA ligase                                          | GO:0008152 | metabolic process                             |
| gij148662787       | acyl-CoA synthetase                                                        | GO:0008152 | metabolic process                             |
| gij148663669       | long-chain-fatty-acid--CoA ligase                                          | GO:0008152 | metabolic process                             |
| gij148661317       | acyl-CoA synthetase                                                        | GO:0008152 | metabolic process                             |
| gij148661325       | acyl-CoA synthetase                                                        | GO:0008152 | metabolic process                             |
| gij148661643       | malate synthase G                                                          | GO:0008152 | metabolic process                             |
| gij148663668       | polyketide synthase                                                        | GO:0008152 | metabolic process                             |
| gij148660459       | elongation factor G                                                        | GO:0008152 | metabolic process                             |
| gij148660331       | polyprenyl-diphosphate synthase GrcC1                                      | GO:0008152 | metabolic process                             |
| gij148660416       | methoxy mycolic acid synthase 4                                            | GO:0008152 | metabolic process                             |
| gij148660879       | serine hydroxymethyltransferase                                            | GO:0008152 | metabolic process                             |
| gij148661633       | hypothetical protein                                                       | GO:0008152 | metabolic process                             |
| gij148660661       | phosphoserine aminotransferase                                             | GO:0008152 | metabolic process                             |
| gij148661974       | UDP-N-acetylmuramoylalanyl-D-glutamate--2,6-diaminopimelate ligase         | GO:0008152 | metabolic process                             |
| gij148661496       | CTP synthetase                                                             | GO:0008152 | metabolic process                             |
| gij148663456       | hypothetical protein                                                       | GO:0008152 | metabolic process                             |
| gij148661961       | hypothetical protein                                                       | GO:0008152 | metabolic process                             |
| gij148659826       | isocitrate dehydrogenase (NADP) Icd2                                       | GO:0008152 | metabolic process                             |
| gij148660013       | succinate dehydrogenase flavoprotein subunit                               | GO:0008152 | metabolic process                             |
| gij148660233       | isocitrate lyase Icl                                                       | GO:0008152 | metabolic process                             |
| gij148660667       | citrate synthase 2                                                         | GO:0008152 | metabolic process                             |
| gij148660674       | type II citrate synthase                                                   | GO:0008152 | metabolic process                             |
| gij148660730       | succinyl-CoA synthetase subunit beta                                       | GO:0008152 | metabolic process                             |
| gij148660731       | succinyl-CoA synthetase subunit alpha                                      | GO:0008152 | metabolic process                             |

|              |                                                                            |            |                       |
|--------------|----------------------------------------------------------------------------|------------|-----------------------|
| gij148660884 | fumarate hydratase                                                         | GO:0008152 | metabolic process     |
| gij148661027 | malate dehydrogenase                                                       | GO:0008152 | metabolic process     |
| gij148661035 | alpha-ketoglutarate decarboxylase                                          | GO:0008152 | metabolic process     |
| gij148661529 | succinic semialdehyde dehydrogenase                                        | GO:0008152 | metabolic process     |
| gij148662032 | dihydrolipoamide acetyltransferase                                         | GO:0008152 | metabolic process     |
| gij148660908 | 6-phosphogluconate dehydrogenase                                           | GO:0008152 | metabolic process     |
| gij148661240 | transaldolase                                                              | GO:0008152 | metabolic process     |
| gij148660129 | fructose-bisphosphate aldolase                                             | GO:0008152 | metabolic process     |
| gij148660256 | phosphoglyceromutase                                                       | GO:0008152 | metabolic process     |
| gij148663444 | cysteinyl-tRNA synthetase                                                  | GO:0008152 | metabolic process     |
| gij148661454 | argininosuccinate synthase                                                 | GO:0008152 | metabolic process     |
| gij148660116 | molecular chaperone DnaK                                                   | GO:0008152 | metabolic process     |
| gij148661845 | antigen Hsp20                                                              | GO:0008152 | metabolic process     |
| gij148661281 | hypothetical protein                                                       | GO:0008152 | metabolic process     |
| gij148661956 | hypothetical protein                                                       | GO:0008152 | metabolic process     |
| gij148662295 | ATP-dependent Clp protease proteolytic subunit                             | GO:0008152 | metabolic process     |
| gij148663282 | co-chaperonin GroES                                                        | GO:0008152 | metabolic process     |
| gij148663076 | isochorismate synthase EntC                                                | GO:0008152 | metabolic process     |
| gij148663491 | inorganic pyrophosphatase                                                  | GO:0008152 | metabolic process     |
| gij148660035 | acyl-CoA synthetase                                                        | GO:0008152 | metabolic process     |
| gij148660320 | acyl-CoA synthetase                                                        | GO:0008152 | metabolic process     |
| gij148660636 | acetyl-CoA acetyltransferase                                               | GO:0008152 | metabolic process     |
| gij148661112 | acetyl-CoA acetyltransferase                                               | GO:0008152 | metabolic process     |
| gij148661268 | aconitate hydratase                                                        | GO:0008152 | metabolic process     |
| gij148661733 | fatty-acid-CoA ligase                                                      | GO:0008152 | metabolic process     |
| gij148663419 | acetyl-CoA acetyltransferase                                               | GO:0008152 | metabolic process     |
| gij148663642 | enoyl-CoA hydratase                                                        | GO:0008152 | metabolic process     |
| gij148662625 | polynucleotide phosphorylase                                               | GO:0008152 | metabolic process     |
| gij148662842 | glutamyl-tRNA synthetase                                                   | GO:0008152 | metabolic process     |
| gij148661080 | arginyl-tRNA synthetase                                                    | GO:0008152 | metabolic process     |
| gij148660203 | molybdopterin biosynthesis protein MoeA2                                   | GO:0008152 | metabolic process     |
| gij148662726 | ribosome recycling factor                                                  | GO:0008152 | metabolic process     |
| gij148662733 | elongation factor Ts                                                       | GO:0008152 | metabolic process     |
| gij148662013 | ubiquinol-cytochrome C reductase QcrB                                      | GO:0008152 | metabolic process     |
| gij148660426 | 50S ribosomal protein L7/L12                                               | GO:0008152 | metabolic process     |
| gij148660458 | 30S ribosomal protein S7                                                   | GO:0008152 | metabolic process     |
| gij148660475 | 30S ribosomal protein S10                                                  | GO:0008152 | metabolic process     |
| gij148661425 | 30S ribosomal protein S1                                                   | GO:0008152 | metabolic process     |
| gij148662734 | 30S ribosomal protein S2                                                   | GO:0008152 | metabolic process     |
| gij148662753 | 30S ribosomal protein S16                                                  | GO:0008152 | metabolic process     |
| gij148662825 | 50S ribosomal protein L28                                                  | GO:0008152 | metabolic process     |
| gij148663323 | 30S ribosomal protein S4                                                   | GO:0008152 | metabolic process     |
| gij148662881 | electron transfer flavoprotein subunit beta                                | GO:0008152 | metabolic process     |
| gij148662446 | pyridoxal biosynthesis lyase PdxS                                          | GO:0008152 | metabolic process     |
| gij148660205 | molecular chaperone GroEL                                                  | GO:0008152 | metabolic process     |
| gij148661094 | ATP synthase F0F1 subunit B                                                | GO:0008152 | metabolic process     |
| gij148661096 | ATP synthase F0F1 subunit alpha                                            | GO:0008152 | metabolic process     |
| gij148661098 | ATP synthase F0F1 subunit beta                                             | GO:0008152 | metabolic process     |
| gij148662385 | hypothetical protein                                                       | GO:0008152 | metabolic process     |
| gij148663717 | hypothetical protein                                                       | GO:0008152 | metabolic process     |
| gij148662080 | transcriptional regulatory protein                                         | GO:0008152 | metabolic process     |
| gij148660441 | DNA-directed RNA polymerase subunit beta                                   | GO:0008152 | metabolic process     |
| gij148660442 | DNA-directed RNA polymerase subunit beta'                                  | GO:0008152 | metabolic process     |
| gij148663322 | DNA-directed RNA polymerase subunit alpha                                  | GO:0008152 | metabolic process     |
| gij148662987 | two component transcriptional regulatory protein DevR                      | GO:0023052 | signaling             |
| gij148663109 | two component sensory transduction transcriptional regulatory protein MtrA | GO:0023052 | signaling             |
| gij148662987 | two component transcriptional regulatory protein DevR                      | GO:0065007 | biological regulation |
| gij148663109 | two component sensory transduction transcriptional regulatory protein MtrA | GO:0065007 | biological regulation |
| gij148662385 | hypothetical protein                                                       | GO:0065007 | biological regulation |
| gij148661845 | antigen Hsp20                                                              | GO:0065007 | biological regulation |
| gij148661961 | hypothetical protein                                                       | GO:0065007 | biological regulation |
| gij148661974 | UDP-N-acetylmuramoylalanyl-D-glutamate--2,6-diaminopimelate ligase         | GO:0065007 | biological regulation |
| gij148660228 | dihydrolipoamide dehydrogenase                                             | GO:0065007 | biological regulation |
| gij148661113 | thioredoxin-related protein                                                | GO:0065007 | biological regulation |
| gij148662032 | dihydrolipoamide acetyltransferase                                         | GO:0065007 | biological regulation |
| gij148661633 | hypothetical protein                                                       | GO:0065007 | biological regulation |
| gij148661325 | acyl-CoA synthetase                                                        | GO:0065007 | biological regulation |
| gij148662787 | acyl-CoA synthetase                                                        | GO:0065007 | biological regulation |
| gij148660118 | molecular chaperone DnaJ                                                   | GO:0065007 | biological regulation |
| gij148661816 | 20-beta-hydroxysteroid dehydrogenase FabG3                                 | GO:0065007 | biological regulation |
| gij148663717 | hypothetical protein                                                       | GO:0065007 | biological regulation |
| gij148663282 | co-chaperonin GroES                                                        | GO:0065007 | biological regulation |
| gij148662987 | two component transcriptional regulatory protein DevR                      | GO:0050896 | response to stimulus  |
| gij148660233 | isocitrate lyase Icl                                                       | GO:0050896 | response to stimulus  |
| gij148663109 | two component sensory transduction transcriptional regulatory protein MtrA | GO:0050896 | response to stimulus  |
| gij148663281 | molecular chaperone GroEL                                                  | GO:0050896 | response to stimulus  |
| gij148660205 | molecular chaperone GroEL                                                  | GO:0050896 | response to stimulus  |
| gij148660460 | elongation factor Tu                                                       | GO:0050896 | response to stimulus  |
| gij148660116 | molecular chaperone DnaK                                                   | GO:0050896 | response to stimulus  |
| gij148660118 | molecular chaperone DnaJ                                                   | GO:0050896 | response to stimulus  |
| gij148661845 | antigen Hsp20                                                              | GO:0050896 | response to stimulus  |
| gij148661810 | hypothetical protein                                                       | GO:0050896 | response to stimulus  |
| gij148659975 | phosphoenolpyruvate carboxykinase                                          | GO:0050896 | response to stimulus  |
| gij148660009 | acyl-CoA dehydrogenase                                                     | GO:0050896 | response to stimulus  |
| gij148660602 | fatty acid desaturase                                                      | GO:0050896 | response to stimulus  |
| gij148661112 | acetyl-CoA acetyltransferase                                               | GO:0050896 | response to stimulus  |
| gij148663419 | acetyl-CoA acetyltransferase                                               | GO:0050896 | response to stimulus  |
| gij148663717 | hypothetical protein                                                       | GO:0050896 | response to stimulus  |
| gij148661325 | acyl-CoA synthetase                                                        | GO:0050896 | response to stimulus  |
| gij148662787 | acyl-CoA synthetase                                                        | GO:0050896 | response to stimulus  |
| gij148662080 | transcriptional regulatory protein                                         | GO:0050896 | response to stimulus  |
| gij148661431 | hypothetical protein                                                       | GO:0050896 | response to stimulus  |
| gij148661268 | aconitate hydratase                                                        | GO:0050896 | response to stimulus  |
| gij148663086 | short chain dehydrogenase                                                  | GO:0050896 | response to stimulus  |
| gij148662038 | glutamine synthetase                                                       | GO:0050896 | response to stimulus  |
| gij148660007 | 3-ketoacyl-ACP reductase                                                   | GO:0050896 | response to stimulus  |
| gij148660441 | DNA-directed RNA polymerase subunit beta                                   | GO:0050896 | response to stimulus  |
| gij148663282 | co-chaperonin GroES                                                        | GO:0050896 | response to stimulus  |

|              |                                                                            |            |                      |
|--------------|----------------------------------------------------------------------------|------------|----------------------|
| gij148662940 | zinc-type alcohol dehydrogenase AdhD                                       | GO:0050896 | response to stimulus |
| gij148660879 | serine hydroxymethyltransferase                                            | GO:0050896 | response to stimulus |
| gij148660988 | tetrahydrodipicolinate N-succinyltransferase                               | GO:0009987 | cellular process     |
| gij148661974 | UDP-N-acetylmuramoylalanyl-D-glutamate--2,6-diaminopimelate ligase         | GO:0009987 | cellular process     |
| gij148662852 | ketol-acid reductoisomerase                                                | GO:0009987 | cellular process     |
| gij148661183 | S-adenosylmethionine synthetase                                            | GO:0009987 | cellular process     |
| gij148663111 | S-adenosyl-L-homocysteine hydrolase                                        | GO:0009987 | cellular process     |
| gij148661096 | ATP synthase FOF1 subunit alpha                                            | GO:0009987 | cellular process     |
| gij148661098 | ATP synthase FOF1 subunit beta                                             | GO:0009987 | cellular process     |
| gij148659975 | phosphoenolpyruvate carboxykinase                                          | GO:0009987 | cellular process     |
| gij148660799 | ribose-phosphate pyrophosphokinase                                         | GO:0009987 | cellular process     |
| gij148661955 | hypothetical protein                                                       | GO:0009987 | cellular process     |
| gij148660947 | pterin-4-alpha-carbinolamine dehydratase                                   | GO:0009987 | cellular process     |
| gij148662028 | glycine cleavage system aminomethyltransferase T                           | GO:0009987 | cellular process     |
| gij148662987 | two component transcriptional regulatory protein DevR                      | GO:0009987 | cellular process     |
| gij148663109 | two component sensory transduction transcriptional regulatory protein MtrA | GO:0009987 | cellular process     |
| gij148659759 | DNA polymerase III subunit beta                                            | GO:0009987 | cellular process     |
| gij148660118 | molecular chaperone DnaJ                                                   | GO:0009987 | cellular process     |
| gij148663433 | 2-hydroxy-6-phenylhexa-2,4-dienoic acid hydrolase                          | GO:0009987 | cellular process     |
| gij148661961 | hypothetical protein                                                       | GO:0009987 | cellular process     |
| gij148663281 | molecular chaperone GroEL                                                  | GO:0009987 | cellular process     |
| gij148660228 | dihydrolipoamide dehydrogenase                                             | GO:0009987 | cellular process     |
| gij148661113 | thioredoxin-related protein                                                | GO:0009987 | cellular process     |
| gij148662032 | dihydrolipoamide acetyltransferase                                         | GO:0009987 | cellular process     |
| gij148662065 | acyl carrier protein                                                       | GO:0009987 | cellular process     |
| gij148660602 | fatty acid desaturase                                                      | GO:0009987 | cellular process     |
| gij148661422 | lipid-transfer protein                                                     | GO:0009987 | cellular process     |
| gij148662003 | long-chain-fatty-acid--CoA ligase                                          | GO:0009987 | cellular process     |
| gij148662787 | acyl-CoA synthetase                                                        | GO:0009987 | cellular process     |
| gij148663251 | hypothetical protein                                                       | GO:0009987 | cellular process     |
| gij148663669 | long-chain-fatty-acid--CoA ligase                                          | GO:0009987 | cellular process     |
| gij148660637 | fatty oxidation complex subunit alpha                                      | GO:0009987 | cellular process     |
| gij148661317 | acyl-CoA synthetase                                                        | GO:0009987 | cellular process     |
| gij148661325 | acyl-CoA synthetase                                                        | GO:0009987 | cellular process     |
| gij148661643 | malate synthase G                                                          | GO:0009987 | cellular process     |
| gij148663668 | polyketide synthase                                                        | GO:0009987 | cellular process     |
| gij148660459 | elongation factor G                                                        | GO:0009987 | cellular process     |
| gij148660460 | elongation factor Tu                                                       | GO:0009987 | cellular process     |
| gij148660331 | polyprenyl-diphosphate synthase GrcC1                                      | GO:0009987 | cellular process     |
| gij148660007 | 3-ketoacyl-ACP reductase                                                   | GO:0009987 | cellular process     |
| gij148661276 | 3-oxoacyl-ACP reductase                                                    | GO:0009987 | cellular process     |
| gij148661810 | hypothetical protein                                                       | GO:0009987 | cellular process     |
| gij148661845 | antigen Hsp20                                                              | GO:0009987 | cellular process     |
| gij148661633 | hypothetical protein                                                       | GO:0009987 | cellular process     |
| gij148660661 | phosphoserine aminotransferase                                             | GO:0009987 | cellular process     |
| gij148660233 | isocitrate lyase Icl                                                       | GO:0009987 | cellular process     |
| gij148662080 | transcriptional regulatory protein                                         | GO:0009987 | cellular process     |
| gij148660116 | molecular chaperone DnaK                                                   | GO:0009987 | cellular process     |
| gij148662038 | glutamine synthetase                                                       | GO:0009987 | cellular process     |
| gij148661496 | CTP synthetase                                                             | GO:0009987 | cellular process     |
| gij148663456 | hypothetical protein                                                       | GO:0009987 | cellular process     |
| gij148659826 | isocitrate dehydrogenase (NADP) Icd2                                       | GO:0009987 | cellular process     |
| gij148660013 | succinate dehydrogenase flavoprotein subunit                               | GO:0009987 | cellular process     |
| gij148660667 | citrate synthase 2                                                         | GO:0009987 | cellular process     |
| gij148660674 | type II citrate synthase                                                   | GO:0009987 | cellular process     |
| gij148660730 | succinyl-CoA synthetase subunit beta                                       | GO:0009987 | cellular process     |
| gij148660731 | succinyl-CoA synthetase subunit alpha                                      | GO:0009987 | cellular process     |
| gij148660884 | fumarate hydratase                                                         | GO:0009987 | cellular process     |
| gij148661027 | malate dehydrogenase                                                       | GO:0009987 | cellular process     |
| gij148661035 | alpha-ketoglutarate decarboxylase                                          | GO:0009987 | cellular process     |
| gij148661529 | succinic semialdehyde dehydrogenase                                        | GO:0009987 | cellular process     |
| gij148660908 | 6-phosphogluconate dehydrogenase                                           | GO:0009987 | cellular process     |
| gij148661240 | transaldolase                                                              | GO:0009987 | cellular process     |
| gij148660129 | fructose-bisphosphate aldolase                                             | GO:0009987 | cellular process     |
| gij148660256 | phosphoglyceromutase                                                       | GO:0009987 | cellular process     |
| gij148662062 | pyruvate dehydrogenase subunit E1                                          | GO:0009987 | cellular process     |
| gij148663444 | cysteinyl-tRNA synthetase                                                  | GO:0009987 | cellular process     |
| gij148661454 | argininosuccinate synthase                                                 | GO:0009987 | cellular process     |
| gij148660879 | serine hydroxymethyltransferase                                            | GO:0009987 | cellular process     |
| gij148660410 | (3R)-hydroxyacyl-ACP dehydratase subunit HadB                              | GO:0009987 | cellular process     |
| gij148660416 | methoxy mycolic acid synthase 4                                            | GO:0009987 | cellular process     |
| gij148663282 | co-chaperonin GroES                                                        | GO:0009987 | cellular process     |
| gij148661816 | 20-beta-hydroxysteroid dehydrogenase FabG3                                 | GO:0009987 | cellular process     |
| gij148663076 | isochorismate synthase EntC                                                | GO:0009987 | cellular process     |
| gij148663491 | inorganic pyrophosphatase                                                  | GO:0009987 | cellular process     |
| gij148662625 | polynucleotide phosphorylase                                               | GO:0009987 | cellular process     |
| gij148662842 | glutamyl-tRNA synthetase                                                   | GO:0009987 | cellular process     |
| gij148661080 | arginyl-tRNA synthetase                                                    | GO:0009987 | cellular process     |
| gij148663717 | hypothetical protein                                                       | GO:0009987 | cellular process     |
| gij148660203 | molybdopterin biosynthesis protein MoeA2                                   | GO:0009987 | cellular process     |
| gij148662726 | ribosome recycling factor                                                  | GO:0009987 | cellular process     |
| gij148662733 | elongation factor Ts                                                       | GO:0009987 | cellular process     |
| gij148662013 | ubiquinol-cytochrome C reductase QcrB                                      | GO:0009987 | cellular process     |
| gij148660426 | 50S ribosomal protein L7/L12                                               | GO:0009987 | cellular process     |
| gij148660458 | 30S ribosomal protein S7                                                   | GO:0009987 | cellular process     |
| gij148660475 | 30S ribosomal protein S10                                                  | GO:0009987 | cellular process     |
| gij148661425 | 30S ribosomal protein S1                                                   | GO:0009987 | cellular process     |
| gij148662734 | 30S ribosomal protein S2                                                   | GO:0009987 | cellular process     |
| gij148662753 | 30S ribosomal protein S16                                                  | GO:0009987 | cellular process     |
| gij148662825 | 50S ribosomal protein L28                                                  | GO:0009987 | cellular process     |
| gij148663323 | 30S ribosomal protein S4                                                   | GO:0009987 | cellular process     |
| gij148662881 | electron transfer flavoprotein subunit beta                                | GO:0009987 | cellular process     |
| gij148662446 | pyridoxal biosynthesis lyase PdxS                                          | GO:0009987 | cellular process     |
| gij148660205 | molecular chaperone GroEL                                                  | GO:0009987 | cellular process     |
| gij148661094 | ATP synthase FOF1 subunit B                                                | GO:0009987 | cellular process     |
| gij148662385 | hypothetical protein                                                       | GO:0009987 | cellular process     |
| gij148660441 | DNA-directed RNA polymerase subunit beta                                   | GO:0009987 | cellular process     |
| gij148660442 | DNA-directed RNA polymerase subunit beta'                                  | GO:0009987 | cellular process     |

|                           |                                                                            |              |                        |
|---------------------------|----------------------------------------------------------------------------|--------------|------------------------|
| gij148663322              | DNA-directed RNA polymerase subunit alpha                                  | GO:0009987   | cellular process       |
| gij148660205              | molecular chaperone GroEL                                                  | GO:0022610   | biological adhesion    |
| gij148661845              | antigen Hsp20                                                              | GO:0040007   | growth                 |
| gij148661325              | acyl-CoA synthetase                                                        | GO:0040007   | growth                 |
| gij148662787              | acyl-CoA synthetase                                                        | GO:0040007   | growth                 |
| gij148662940              | zinc-type alcohol dehydrogenase AdhD                                       | GO:0040007   | growth                 |
| gij148663109              | two component sensory transduction transcriptional regulatory protein MtrA | GO:0040007   | growth                 |
| gij148663433              | 2-hydroxy-6-phenylhexa-2,4-dienoic acid hydrolase                          | GO:0040007   | growth                 |
| gij148662385              | hypothetical protein                                                       | GO:0040007   | growth                 |
| gij148660104              | iron-sulfur-binding reductase                                              | GO:0040007   | growth                 |
| gij148660116              | molecular chaperone DnaK                                                   | GO:0040007   | growth                 |
| gij148660118              | molecular chaperone DnaJ                                                   | GO:0040007   | growth                 |
| gij148660205              | molecular chaperone GroEL                                                  | GO:0040007   | growth                 |
| gij148660228              | dihydrolipoamide dehydrogenase                                             | GO:0040007   | growth                 |
| gij148660331              | polyprenyl-diphosphate synthase GrcC1                                      | GO:0040007   | growth                 |
| gij148660410              | (3R)-hydroxyacyl-ACP dehydratase subunit HadB                              | GO:0040007   | growth                 |
| gij148660426              | 50S ribosomal protein L7/L12                                               | GO:0040007   | growth                 |
| gij148660441              | DNA-directed RNA polymerase subunit beta                                   | GO:0040007   | growth                 |
| gij148660442              | DNA-directed RNA polymerase subunit beta'                                  | GO:0040007   | growth                 |
| gij148660458              | 30S ribosomal protein S7                                                   | GO:0040007   | growth                 |
| gij148660459              | elongation factor G                                                        | GO:0040007   | growth                 |
| gij148660460              | elongation factor Tu                                                       | GO:0040007   | growth                 |
| gij148660475              | 30S ribosomal protein S10                                                  | GO:0040007   | growth                 |
| gij148660602              | fatty acid desaturase                                                      | GO:0040007   | growth                 |
| gij148660661              | phosphoserine aminotransferase                                             | GO:0040007   | growth                 |
| gij148660730              | succinyl-CoA synthetase subunit beta                                       | GO:0040007   | growth                 |
| gij148660731              | succinyl-CoA synthetase subunit alpha                                      | GO:0040007   | growth                 |
| gij148660799              | ribose-phosphate pyrophosphokinase                                         | GO:0040007   | growth                 |
| gij148660884              | fumarate hydratase                                                         | GO:0040007   | growth                 |
| gij148660908              | 6-phosphogluconate dehydrogenase                                           | GO:0040007   | growth                 |
| gij148660988              | tetrahydrodipicolinate N-succinyltransferase                               | GO:0040007   | growth                 |
| gij148661035              | alpha-ketoglutarate decarboxylase                                          | GO:0040007   | growth                 |
| gij148661080              | arginyl-tRNA synthetase                                                    | GO:0040007   | growth                 |
| gij148661094              | ATP synthase F0F1 subunit B                                                | GO:0040007   | growth                 |
| gij148661096              | ATP synthase F0F1 subunit alpha                                            | GO:0040007   | growth                 |
| gij148661098              | ATP synthase F0F1 subunit beta                                             | GO:0040007   | growth                 |
| gij148661183              | S-adenosylmethionine synthetase                                            | GO:0040007   | growth                 |
| gij148661240              | transaldolase                                                              | GO:0040007   | growth                 |
| gij148661268              | aconitate hydratase                                                        | GO:0040007   | growth                 |
| gij148661273              | hypothetical protein                                                       | GO:0040007   | growth                 |
| gij148661425              | 30S ribosomal protein S1                                                   | GO:0040007   | growth                 |
| gij148661454              | argininosuccinate synthase                                                 | GO:0040007   | growth                 |
| gij148661496              | CTP synthetase                                                             | GO:0040007   | growth                 |
| gij148661961              | hypothetical protein                                                       | GO:0040007   | growth                 |
| gij148662013              | ubiquinol-cytochrome C reductase QcrB                                      | GO:0040007   | growth                 |
| gij148662028              | glycine cleavage system aminomethyltransferase T                           | GO:0040007   | growth                 |
| gij148662032              | dihydrolipoamide acetyltransferase                                         | GO:0040007   | growth                 |
| gij148662038              | glutamine synthetase                                                       | GO:0040007   | growth                 |
| gij148662065              | acyl carrier protein                                                       | GO:0040007   | growth                 |
| gij148662295              | ATP-dependent Clp protease proteolytic subunit                             | GO:0040007   | growth                 |
| gij148662446              | pyridoxal biosynthesis lyase PdxS                                          | GO:0040007   | growth                 |
| gij148662726              | ribosome recycling factor                                                  | GO:0040007   | growth                 |
| gij148662733              | elongation factor Ts                                                       | GO:0040007   | growth                 |
| gij148662734              | 30S ribosomal protein S2                                                   | GO:0040007   | growth                 |
| gij148662842              | glutamyl-tRNA synthetase                                                   | GO:0040007   | growth                 |
| gij148662852              | ketol-acid reductoisomerase                                                | GO:0040007   | growth                 |
| gij148662881              | electron transfer flavoprotein subunit beta                                | GO:0040007   | growth                 |
| gij148662995              | acyl-CoA dehydrogenase                                                     | GO:0040007   | growth                 |
| gij148663111              | S-adenosyl-L-homocysteine hydrolase                                        | GO:0040007   | growth                 |
| gij148663281              | molecular chaperone GroEL                                                  | GO:0040007   | growth                 |
| gij148663282              | co-chaperonin GroES                                                        | GO:0040007   | growth                 |
| gij148663322              | DNA-directed RNA polymerase subunit alpha                                  | GO:0040007   | growth                 |
| gij148663323              | 30S ribosomal protein S4                                                   | GO:0040007   | growth                 |
| gij148663444              | cysteinyl-tRNA synthetase                                                  | GO:0040007   | growth                 |
| gij148663668              | polyketide synthase                                                        | GO:0040007   | growth                 |
| gij148663669              | long-chain-fatty-acid--CoA ligase                                          | GO:0040007   | growth                 |
| gij148661096              | ATP synthase F0F1 subunit alpha                                            | GO:0051179   | localization           |
| gij148661098              | ATP synthase F0F1 subunit beta                                             | GO:0051179   | localization           |
| gij148663732              | hypothetical protein                                                       | GO:0051179   | localization           |
| gij148663717              | hypothetical protein                                                       | GO:0051179   | localization           |
| gij148661094              | ATP synthase F0F1 subunit B                                                | GO:0051179   | localization           |
| gij148661961              | hypothetical protein                                                       | GO:0032502   | developmental process  |
| gij148661974              | UDP-N-acetylmuramoylalanyl-D-glutamate--2,6-diaminopimelate ligase         | GO:0032502   | developmental process  |
| gij148662987              | two component transcriptional regulatory protein DevR                      | GO:0032502   | developmental process  |
| gij148661845              | antigen Hsp20                                                              | GO:0051704   | multi-organism process |
| gij148661325              | acyl-CoA synthetase                                                        | GO:0051704   | multi-organism process |
| gij148662787              | acyl-CoA synthetase                                                        | GO:0051704   | multi-organism process |
| gij148662940              | zinc-type alcohol dehydrogenase AdhD                                       | GO:0051704   | multi-organism process |
| gij148663109              | two component sensory transduction transcriptional regulatory protein MtrA | GO:0051704   | multi-organism process |
| gij148663433              | 2-hydroxy-6-phenylhexa-2,4-dienoic acid hydrolase                          | GO:0051704   | multi-organism process |
| gij148660205              | molecular chaperone GroEL                                                  | GO:0051704   | multi-organism process |
| gij148660233              | isocitrate lyase Icl                                                       | GO:0051704   | multi-organism process |
| gij148662032              | dihydrolipoamide acetyltransferase                                         | GO:0051704   | multi-organism process |
| gij148662038              | glutamine synthetase                                                       | GO:0051704   | multi-organism process |
| gij148662987              | two component transcriptional regulatory protein DevR                      | GO:0051704   | multi-organism process |
| gij148663717              | hypothetical protein                                                       | GO:0051704   | multi-organism process |
| gij148659975              | phosphoenolpyruvate carboxykinase                                          | GO:0051704   | multi-organism process |
| gij148660009              | acyl-CoA dehydrogenase                                                     | GO:0051704   | multi-organism process |
| gij148660602              | fatty acid desaturase                                                      | GO:0051704   | multi-organism process |
| gij148661112              | acetyl-CoA acetyltransferase                                               | GO:0051704   | multi-organism process |
| gij148663419              | acetyl-CoA acetyltransferase                                               | GO:0051704   | multi-organism process |
| gij148660879              | serine hydroxymethyltransferase                                            | GO:0051704   | multi-organism process |
| <b>Molecular Function</b> |                                                                            |              |                        |
| <b>Protein_ID</b>         | <b>Description</b>                                                         | <b>GO_ID</b> | <b>GO_Term</b>         |
| gij148660228              | dihydrolipoamide dehydrogenase                                             | GO:0016209   | antioxidant activity   |
| gij148661530              | hypothetical protein                                                       | GO:0016209   | antioxidant activity   |
| gij148662032              | dihydrolipoamide acetyltransferase                                         | GO:0016209   | antioxidant activity   |
| gij148660172              | f420-dependent glucose-6-phosphate dehydrogenase FgdI                      | GO:0003824   | catalytic activity     |



|              |                                                                            |            |                    |
|--------------|----------------------------------------------------------------------------|------------|--------------------|
| gii148660908 | 6-phosphogluconate dehydrogenase                                           | GO:0003824 | catalytic activity |
| gii148660104 | iron-sulfur-binding reductase                                              | GO:0003824 | catalytic activity |
| gii148659975 | phosphoenolpyruvate carboxykinase                                          | GO:0003824 | catalytic activity |
| gii148660441 | DNA-directed RNA polymerase subunit beta                                   | GO:0003824 | catalytic activity |
| gii148660442 | DNA-directed RNA polymerase subunit beta'                                  | GO:0003824 | catalytic activity |
| gii148663322 | DNA-directed RNA polymerase subunit alpha                                  | GO:0003824 | catalytic activity |
| gii148660593 | thiosulfate sulfurtransferase CysA2                                        | GO:0003824 | catalytic activity |
| gii148662971 | thiosulfate sulfurtransferase CysA3                                        | GO:0003824 | catalytic activity |
| gii148661329 | hypothetical protein                                                       | GO:0003824 | catalytic activity |
| gii148660459 | elongation factor G                                                        | GO:0003824 | catalytic activity |
| gii148660460 | elongation factor Tu                                                       | GO:0003824 | catalytic activity |
| gii148659759 | DNA polymerase III subunit beta                                            | GO:0003824 | catalytic activity |
| gii148660799 | ribose-phosphate pyrophosphokinase                                         | GO:0003824 | catalytic activity |
| gii148661955 | hypothetical protein                                                       | GO:0003824 | catalytic activity |
| gii148663109 | two component sensory transduction transcriptional regulatory protein MtrA | GO:0003824 | catalytic activity |
| gii148661496 | CTP synthetase                                                             | GO:0003824 | catalytic activity |
| gii148663433 | 2-hydroxy-6-phenylhexa-2,4-dienoic acid hydrolase                          | GO:0003824 | catalytic activity |
| gii148661096 | ATP synthase FOF1 subunit alpha                                            | GO:0003824 | catalytic activity |
| gii148661098 | ATP synthase FOF1 subunit beta                                             | GO:0003824 | catalytic activity |
| gii148660228 | dihydrolipoamide dehydrogenase                                             | GO:0003824 | catalytic activity |
| gii148660731 | succinyl-CoA synthetase subunit alpha                                      | GO:0003824 | catalytic activity |
| gii148660416 | methoxy mycolic acid synthase 4                                            | GO:0003824 | catalytic activity |
| gii148662032 | dihydrolipoamide acetyltransferase                                         | GO:0003824 | catalytic activity |
| gii148659912 | short-chain type dehydrogenase/reductase                                   | GO:0003824 | catalytic activity |
| gii148660637 | fatty oxidation complex subunit alpha                                      | GO:0003824 | catalytic activity |
| gii148663456 | hypothetical protein                                                       | GO:0003824 | catalytic activity |
| gii148661974 | UDP-N-acetylmuramoylalanyl-D-glutamate--2,6-diaminopimelate ligase         | GO:0003824 | catalytic activity |
| gii148662102 | dehydrogenase                                                              | GO:0003824 | catalytic activity |
| gii148660529 | MmsA                                                                       | GO:0003824 | catalytic activity |
| gii148663007 | NADH dehydrogenase subunit H                                               | GO:0003824 | catalytic activity |
| gii148660256 | phosphoglyceromutase                                                       | GO:0003824 | catalytic activity |
| gii148660320 | acyl-CoA synthetase                                                        | GO:0003824 | catalytic activity |
| gii148659921 | NAD(P) transhydrogenase subunit beta                                       | GO:0003824 | catalytic activity |
| gii148662995 | acyl-CoA dehydrogenase                                                     | GO:0003824 | catalytic activity |
| gii148663137 | acyl-CoA dehydrogenase                                                     | GO:0003824 | catalytic activity |
| gii148661268 | aconitate hydratase                                                        | GO:0003824 | catalytic activity |
| gii148661183 | S-adenosylmethionine synthetase                                            | GO:0003824 | catalytic activity |
| gii148661643 | malate synthase G                                                          | GO:0003824 | catalytic activity |
| gii148660667 | citrate synthase 2                                                         | GO:0003824 | catalytic activity |
| gii148660674 | type II citrate synthase                                                   | GO:0003824 | catalytic activity |
| gii148661733 | fatty-acid--CoA ligase                                                     | GO:0003824 | catalytic activity |
| gii148662003 | long-chain-fatty-acid--CoA ligase                                          | GO:0003824 | catalytic activity |
| gii148662787 | acyl-CoA synthetase                                                        | GO:0003824 | catalytic activity |
| gii148661529 | succinic semialdehyde dehydrogenase                                        | GO:0003824 | catalytic activity |
| gii148663444 | cysteinyI-tRNA synthetase                                                  | GO:0003824 | catalytic activity |
| gii148662852 | ketol-acid reductoisomerase                                                | GO:0003824 | catalytic activity |
| gii148660233 | isocitrate lyase Icl                                                       | GO:0003824 | catalytic activity |
| gii148659826 | isocitrate dehydrogenase (NADP) Icd2                                       | GO:0003824 | catalytic activity |
| gii148661035 | alpha-ketoglutarate decarboxylase                                          | GO:0003824 | catalytic activity |
| gii148661454 | argininosuccinate synthase                                                 | GO:0003824 | catalytic activity |
| gii148662625 | polynucleotide phosphorylase                                               | GO:0003824 | catalytic activity |
| gii148662028 | glycine cleavage system aminomethyltransferase T                           | GO:0003824 | catalytic activity |
| gii148660988 | tetrahydrodipicolinate N-succinyltransferase                               | GO:0003824 | catalytic activity |
| gii148660204 | short chain dehydrogenase                                                  | GO:0003824 | catalytic activity |
| gii148660410 | (3R)-hydroxyacyl-ACP dehydratase subunit HadB                              | GO:0003824 | catalytic activity |
| gii148661530 | hypothetical protein                                                       | GO:0003824 | catalytic activity |
| gii148663086 | short chain dehydrogenase                                                  | GO:0003824 | catalytic activity |
| gii148663251 | hypothetical protein                                                       | GO:0003824 | catalytic activity |
| gii148662940 | zinc-type alcohol dehydrogenase AdhD                                       | GO:0003824 | catalytic activity |
| gii148663491 | inorganic pyrophosphatase                                                  | GO:0003824 | catalytic activity |
| gii148660967 | hypothetical protein                                                       | GO:0003824 | catalytic activity |
| gii148661027 | malate dehydrogenase                                                       | GO:0003824 | catalytic activity |
| gii148662842 | glutamyl-tRNA synthetase                                                   | GO:0003824 | catalytic activity |
| gii148661080 | arginyl-tRNA synthetase                                                    | GO:0003824 | catalytic activity |
| gii148660035 | acyl-CoA synthetase                                                        | GO:0003824 | catalytic activity |
| gii148661317 | acyl-CoA synthetase                                                        | GO:0003824 | catalytic activity |
| gii148661325 | acyl-CoA synthetase                                                        | GO:0003824 | catalytic activity |
| gii148663669 | long-chain-fatty-acid--CoA ligase                                          | GO:0003824 | catalytic activity |
| gii148660730 | succinyl-CoA synthetase subunit beta                                       | GO:0003824 | catalytic activity |
| gii148663111 | S-adenosyl-L-homocysteine hydrolase                                        | GO:0003824 | catalytic activity |
| gii148660879 | serine hydroxymethyltransferase                                            | GO:0003824 | catalytic activity |
| gii148661113 | thioredoxin-related protein                                                | GO:0003824 | catalytic activity |
| gii148661240 | transaldolase                                                              | GO:0003824 | catalytic activity |
| gii148661956 | hypothetical protein                                                       | GO:0003824 | catalytic activity |
| gii148661281 | hypothetical protein                                                       | GO:0003824 | catalytic activity |
| gii148663642 | enoyl-CoA hydratase                                                        | GO:0003824 | catalytic activity |
| gii148662038 | glutamine synthetase                                                       | GO:0003824 | catalytic activity |
| gii148661816 | 20-beta-hydroxysteroid dehydrogenase FabG3                                 | GO:0003824 | catalytic activity |
| gii148662311 | NAD-dependent glutamate dehydrogenase Gdh                                  | GO:0003824 | catalytic activity |
| gii148662446 | pyridoxal biosynthesis lyase PdxS                                          | GO:0003824 | catalytic activity |
| gii148660013 | succinate dehydrogenase flavoprotein subunit                               | GO:0003824 | catalytic activity |
| gii148662080 | transcriptional regulatory protein                                         | GO:0003824 | catalytic activity |
| gii148662062 | pyruvate dehydrogenase subunit E1                                          | GO:0003824 | catalytic activity |
| gii148662825 | 50S ribosomal protein L28                                                  | GO:0003824 | catalytic activity |
| gii148660884 | fumarate hydratase                                                         | GO:0003824 | catalytic activity |
| gii148660129 | fructose-bisphosphate aldolase                                             | GO:0003824 | catalytic activity |
| gii148660602 | fatty acid desaturase                                                      | GO:0003824 | catalytic activity |
| gii148663668 | polyketide synthase                                                        | GO:0003824 | catalytic activity |
| gii148660116 | molecular chaperone DnaK                                                   | GO:0003824 | catalytic activity |
| gii148661094 | ATP synthase FOF1 subunit B                                                | GO:0003824 | catalytic activity |
| gii148660007 | 3-ketoacyl-ACP reductase                                                   | GO:0003824 | catalytic activity |
| gii148661276 | 3-oxoacyl-ACP reductase                                                    | GO:0003824 | catalytic activity |
| gii148659995 | acyl-CoA dehydrogenase                                                     | GO:0003824 | catalytic activity |
| gii148660009 | acyl-CoA dehydrogenase                                                     | GO:0003824 | catalytic activity |
| gii148660036 | acyl-CoA dehydrogenase                                                     | GO:0003824 | catalytic activity |
| gii148661422 | lipid-transfer protein                                                     | GO:0003824 | catalytic activity |
| gii148660636 | acetyl-CoA acetyltransferase                                               | GO:0003824 | catalytic activity |
| gii148661112 | acetyl-CoA acetyltransferase                                               | GO:0003824 | catalytic activity |

|              |                                                                            |            |                                                    |
|--------------|----------------------------------------------------------------------------|------------|----------------------------------------------------|
| gij148663419 | acetyl-CoA acetyltransferase                                               | GO:0003824 | catalytic activity                                 |
| gij148662295 | ATP-dependent Clp protease proteolytic subunit                             | GO:0003824 | catalytic activity                                 |
| gij148660947 | pterin-4-alpha-carbinolamine dehydratase                                   | GO:0003824 | catalytic activity                                 |
| gij148662013 | ubiquinol-cytochrome C reductase QcrB                                      | GO:0003824 | catalytic activity                                 |
| gij148660661 | phosphoserine aminotransferase                                             | GO:0003824 | catalytic activity                                 |
| gij148660203 | molybdopterin biosynthesis protein MoeA2                                   | GO:0003824 | catalytic activity                                 |
| gij148660331 | polyprenyl-diphosphate synthase GrcC1                                      | GO:0003824 | catalytic activity                                 |
| gij148663076 | isochorismate synthase EntC                                                | GO:0003824 | catalytic activity                                 |
| gij148662987 | two component transcriptional regulatory protein DevR                      | GO:0060089 | molecular transducer activity                      |
| gij148663109 | two component sensory transduction transcriptional regulatory protein MtrA | GO:0060089 | molecular transducer activity                      |
| gij148661096 | ATP synthase F0F1 subunit alpha                                            | GO:0005215 | transporter activity                               |
| gij148661098 | ATP synthase F0F1 subunit beta                                             | GO:0005215 | transporter activity                               |
| gij148661094 | ATP synthase F0F1 subunit B                                                | GO:0005215 | transporter activity                               |
| gij148662013 | ubiquinol-cytochrome C reductase QcrB                                      | GO:0005215 | transporter activity                               |
| gij148660426 | 50S ribosomal protein L7/L12                                               | GO:0005198 | structural molecule activity                       |
| gij148660458 | 30S ribosomal protein S7                                                   | GO:0005198 | structural molecule activity                       |
| gij148660475 | 30S ribosomal protein S10                                                  | GO:0005198 | structural molecule activity                       |
| gij148661425 | 30S ribosomal protein S1                                                   | GO:0005198 | structural molecule activity                       |
| gij148662734 | 30S ribosomal protein S2                                                   | GO:0005198 | structural molecule activity                       |
| gij148662753 | 30S ribosomal protein S16                                                  | GO:0005198 | structural molecule activity                       |
| gij148662825 | 50S ribosomal protein L28                                                  | GO:0005198 | structural molecule activity                       |
| gij148663323 | 30S ribosomal protein S4                                                   | GO:0005198 | structural molecule activity                       |
| gij148662987 | two component transcriptional regulatory protein DevR                      | GO:0001071 | nucleic acid binding transcription factor activity |
| gij148660593 | thiosulfate sulfurtransferase CysA2                                        | GO:0009055 | electron carrier activity                          |
| gij148661035 | alpha-ketoglutarate decarboxylase                                          | GO:0009055 | electron carrier activity                          |
| gij148661113 | thioredoxin-related protein                                                | GO:0009055 | electron carrier activity                          |
| gij148662013 | ubiquinol-cytochrome C reductase QcrB                                      | GO:0009055 | electron carrier activity                          |
| gij148662881 | electron transfer flavoprotein subunit beta                                | GO:0009055 | electron carrier activity                          |
| gij148662971 | thiosulfate sulfurtransferase CysA3                                        | GO:0009055 | electron carrier activity                          |
| gij148663322 | DNA-directed RNA polymerase subunit alpha                                  | GO:0005488 | binding                                            |
| gij148659826 | isocitrate dehydrogenase (NADP) Icd2                                       | GO:0005488 | binding                                            |
| gij148660730 | succinyl-CoA synthetase subunit beta                                       | GO:0005488 | binding                                            |
| gij148660799 | ribose-phosphate pyrophosphokinase                                         | GO:0005488 | binding                                            |
| gij148660988 | tetrahydrodipicolinate N-succinyltransferase                               | GO:0005488 | binding                                            |
| gij148661035 | alpha-ketoglutarate decarboxylase                                          | GO:0005488 | binding                                            |
| gij148661183 | S-adenosylmethionine synthetase                                            | GO:0005488 | binding                                            |
| gij148661643 | malate synthase G                                                          | GO:0005488 | binding                                            |
| gij148662038 | glutamine synthetase                                                       | GO:0005488 | binding                                            |
| gij148662062 | pyruvate dehydrogenase subunit E1                                          | GO:0005488 | binding                                            |
| gij148663491 | inorganic pyrophosphatase                                                  | GO:0005488 | binding                                            |
| gij148660458 | 30S ribosomal protein S7                                                   | GO:0005488 | binding                                            |
| gij148663323 | 30S ribosomal protein S4                                                   | GO:0005488 | binding                                            |
| gij148660661 | phosphoserine aminotransferase                                             | GO:0005488 | binding                                            |
| gij148660879 | serine hydroxymethyltransferase                                            | GO:0005488 | binding                                            |
| gij148660602 | fatty acid desaturase                                                      | GO:0005488 | binding                                            |
| gij148660203 | molybdopterin biosynthesis protein MoeA2                                   | GO:0005488 | binding                                            |
| gij148662013 | ubiquinol-cytochrome C reductase QcrB                                      | GO:0005488 | binding                                            |
| gij148663282 | co-chaperonin GroES                                                        | GO:0005488 | binding                                            |
| gij148659975 | phosphoenolpyruvate carboxykinase                                          | GO:0005488 | binding                                            |
| gij148663668 | polyketide synthase                                                        | GO:0005488 | binding                                            |
| gij148661268 | aconitate hydratase                                                        | GO:0005488 | binding                                            |
| gij148660104 | iron-sulfur-binding reductase                                              | GO:0005488 | binding                                            |
| gij148660459 | elongation factor G                                                        | GO:0005488 | binding                                            |
| gij148660460 | elongation factor Tu                                                       | GO:0005488 | binding                                            |
| gij148660116 | molecular chaperone DnaK                                                   | GO:0005488 | binding                                            |
| gij148660118 | molecular chaperone DnaJ                                                   | GO:0005488 | binding                                            |
| gij148660205 | molecular chaperone GroEL                                                  | GO:0005488 | binding                                            |
| gij148660731 | succinyl-CoA synthetase subunit alpha                                      | GO:0005488 | binding                                            |
| gij148660967 | hypothetical protein                                                       | GO:0005488 | binding                                            |
| gij148661080 | arginyl-tRNA synthetase                                                    | GO:0005488 | binding                                            |
| gij148661096 | ATP synthase F0F1 subunit alpha                                            | GO:0005488 | binding                                            |
| gij148661098 | ATP synthase F0F1 subunit beta                                             | GO:0005488 | binding                                            |
| gij148661454 | argininosuccinate synthase                                                 | GO:0005488 | binding                                            |
| gij148661496 | CTP synthetase                                                             | GO:0005488 | binding                                            |
| gij148661974 | UDP-N-acetylmuramoylalanyl-D-glutamate--2,6-diaminopimelate ligase         | GO:0005488 | binding                                            |
| gij148662003 | long-chain-fatty-acid--CoA ligase                                          | GO:0005488 | binding                                            |
| gij148662295 | ATP-dependent Clp protease proteolytic subunit                             | GO:0005488 | binding                                            |
| gij148662787 | acyl-CoA synthetase                                                        | GO:0005488 | binding                                            |
| gij148662842 | glutamyl-tRNA synthetase                                                   | GO:0005488 | binding                                            |
| gij148663281 | molecular chaperone GroEL                                                  | GO:0005488 | binding                                            |
| gij148663444 | cysteinyl-tRNA synthetase                                                  | GO:0005488 | binding                                            |
| gij148663669 | long-chain-fatty-acid--CoA ligase                                          | GO:0005488 | binding                                            |
| gij148660410 | (3R)-hydroxyacyl-ACP dehydratase subunit HadB                              | GO:0005488 | binding                                            |
| gij148660416 | methoxy mycolic acid synthase 4                                            | GO:0005488 | binding                                            |
| gij148660475 | 30S ribosomal protein S10                                                  | GO:0005488 | binding                                            |
| gij148661633 | hypothetical protein                                                       | GO:0005488 | binding                                            |
| gij148661961 | hypothetical protein                                                       | GO:0005488 | binding                                            |
| gij148662032 | dihydrolipoamide acetyltransferase                                         | GO:0005488 | binding                                            |
| gij148662065 | acyl carrier protein                                                       | GO:0005488 | binding                                            |
| gij148662311 | NAD-dependent glutamate dehydrogenase Gdh                                  | GO:0005488 | binding                                            |
| gij148660129 | fructose-bisphosphate aldolase                                             | GO:0005488 | binding                                            |
| gij148662940 | zinc-type alcohol dehydrogenase AdhD                                       | GO:0005488 | binding                                            |
| gij148659912 | short-chain type dehydrogenase/reductase                                   | GO:0005488 | binding                                            |
| gij148660204 | short chain dehydrogenase                                                  | GO:0005488 | binding                                            |
| gij148660637 | fatty oxidation complex subunit alpha                                      | GO:0005488 | binding                                            |
| gij148661027 | malate dehydrogenase                                                       | GO:0005488 | binding                                            |
| gij148661317 | acyl-CoA synthetase                                                        | GO:0005488 | binding                                            |
| gij148661325 | acyl-CoA synthetase                                                        | GO:0005488 | binding                                            |
| gij148661816 | 20-beta-hydroxysteroid dehydrogenase FabG3                                 | GO:0005488 | binding                                            |
| gij148663086 | short chain dehydrogenase                                                  | GO:0005488 | binding                                            |
| gij148660228 | dihydrolipoamide dehydrogenase                                             | GO:0005488 | binding                                            |
| gij148663111 | S-adenosyl-L-homocysteine hydrolase                                        | GO:0005488 | binding                                            |
| gij148661276 | 3-oxoacyl-ACP reductase                                                    | GO:0005488 | binding                                            |
| gij148662733 | elongation factor Ts                                                       | GO:0005488 | binding                                            |
| gij148661425 | 30S ribosomal protein S1                                                   | GO:0005488 | binding                                            |
| gij148662625 | polynucleotide phosphorylase                                               | GO:0005488 | binding                                            |
| gij148659759 | DNA polymerase III subunit beta                                            | GO:0005488 | binding                                            |
| gij148660441 | DNA-directed RNA polymerase subunit beta                                   | GO:0005488 | binding                                            |

|                              |                                                                            |                 |         |
|------------------------------|----------------------------------------------------------------------------|-----------------|---------|
| gij148660442                 | DNA-directed RNA polymerase subunit beta'                                  | GO:0005488      | binding |
| gij148662385                 | hypothetical protein                                                       | GO:0005488      | binding |
| gij148663109                 | two component sensory transduction transcriptional regulatory protein MtrA | GO:0005488      | binding |
| gij148662987                 | two component transcriptional regulatory protein DevR                      | GO:0005488      | binding |
| gij148663717                 | hypothetical protein                                                       | GO:0005488      | binding |
| gij148660593                 | thiosulfate sulfurtransferase CysA2                                        | GO:0005488      | binding |
| gij148662971                 | thiosulfate sulfurtransferase CysA3                                        | GO:0005488      | binding |
| gij148663456                 | hypothetical protein                                                       | GO:0005488      | binding |
| gij148661845                 | antigen Hsp20                                                              | GO:0005488      | binding |
| gij148663007                 | NADH dehydrogenase subunit H                                               | GO:0005488      | binding |
| gij148662852                 | ketol-acid reductoisomerase                                                | GO:0005488      | binding |
| gij148659921                 | NAD(P) transhydrogenase subunit beta                                       | GO:0005488      | binding |
| gij148660007                 | 3-ketoacyl-ACP reductase                                                   | GO:0005488      | binding |
| gij148660908                 | 6-phosphogluconate dehydrogenase                                           | GO:0005488      | binding |
| gij148660009                 | acyl-CoA dehydrogenase                                                     | GO:0005488      | binding |
| gij148660013                 | succinate dehydrogenase flavoprotein subunit                               | GO:0005488      | binding |
| gij148660036                 | acyl-CoA dehydrogenase                                                     | GO:0005488      | binding |
| gij148662102                 | dehydrogenase                                                              | GO:0005488      | binding |
| gij148662995                 | acyl-CoA dehydrogenase                                                     | GO:0005488      | binding |
| gij148663137                 | acyl-CoA dehydrogenase                                                     | GO:0005488      | binding |
| gij148662726                 | ribosome recycling factor                                                  | GO:0005488      | binding |
| gij148660172                 | f420-dependent glucose-6-phosphate dehydrogenase Fgd1                      | GO:0005488      | binding |
| gij148663433                 | 2-hydroxy-6-phenylhexa-2,4-dienoic acid hydrolase                          | GO:0005488      | binding |
| <b>Cellular localization</b> |                                                                            |                 |         |
| <b>Protein_ID</b>            | <b>Discription</b>                                                         | <b>Location</b> |         |
| gij148661845                 | antigen Hsp20                                                              | Cellwall        |         |
| gij148659759                 | DNA polymerase III subunit beta                                            | Cytoplasmic     |         |
| gij148659826                 | isocitrate dehydrogenase (NADP) Icd2                                       | Cytoplasmic     |         |
| gij148659912                 | short-chain type dehydrogenase/reductase                                   | Cytoplasmic     |         |
| gij148659975                 | phosphoenolpyruvate carboxykinase                                          | Cytoplasmic     |         |
| gij148659995                 | acyl-CoA dehydrogenase                                                     | Cytoplasmic     |         |
| gij148660007                 | 3-ketoacyl-ACP reductase                                                   | Cytoplasmic     |         |
| gij148660009                 | acyl-CoA dehydrogenase                                                     | Cytoplasmic     |         |
| gij148660035                 | acyl-CoA synthetase                                                        | Cytoplasmic     |         |
| gij148660036                 | acyl-CoA dehydrogenase                                                     | Cytoplasmic     |         |
| gij148660116                 | molecular chaperone DnaK                                                   | Cytoplasmic     |         |
| gij148660118                 | molecular chaperone DnaJ                                                   | Cytoplasmic     |         |
| gij148660129                 | fructose-bisphosphate aldolase                                             | Cytoplasmic     |         |
| gij148660172                 | f420-dependent glucose-6-phosphate dehydrogenase Fgd1                      | Cytoplasmic     |         |
| gij148660203                 | molybdopterin biosynthesis protein MoeA2                                   | Cytoplasmic     |         |
| gij148660205                 | molecular chaperone GroEL                                                  | Cytoplasmic     |         |
| gij148660228                 | dihydrolipoamide dehydrogenase                                             | Cytoplasmic     |         |
| gij148660233                 | isocitrate lyase Icl                                                       | Cytoplasmic     |         |
| gij148660320                 | acyl-CoA synthetase                                                        | Cytoplasmic     |         |
| gij148660331                 | polyprenyl-diphosphate synthase GrcC1                                      | Cytoplasmic     |         |
| gij148660416                 | methoxy mycolic acid synthase 4                                            | Cytoplasmic     |         |
| gij148660426                 | 50S ribosomal protein L7/L12                                               | Cytoplasmic     |         |
| gij148660441                 | DNA-directed RNA polymerase subunit beta                                   | Cytoplasmic     |         |
| gij148660442                 | DNA-directed RNA polymerase subunit beta'                                  | Cytoplasmic     |         |
| gij148660458                 | 30S ribosomal protein S7                                                   | Cytoplasmic     |         |
| gij148660459                 | elongation factor G                                                        | Cytoplasmic     |         |
| gij148660460                 | elongation factor Tu                                                       | Cytoplasmic     |         |
| gij148660475                 | 30S ribosomal protein S10                                                  | Cytoplasmic     |         |
| gij148660529                 | MmsA                                                                       | Cytoplasmic     |         |
| gij148660593                 | thiosulfate sulfurtransferase CysA2                                        | Cytoplasmic     |         |
| gij148660602                 | fatty acid desaturase                                                      | Cytoplasmic     |         |
| gij148660636                 | acetyl-CoA acetyltransferase                                               | Cytoplasmic     |         |
| gij148660637                 | fatty oxidation complex subunit alpha                                      | Cytoplasmic     |         |
| gij148660667                 | citrate synthase 2                                                         | Cytoplasmic     |         |
| gij148660674                 | type II citrate synthase                                                   | Cytoplasmic     |         |
| gij148660730                 | succinyl-CoA synthetase subunit beta                                       | Cytoplasmic     |         |
| gij148660799                 | ribose-phosphate pyrophosphokinase                                         | Cytoplasmic     |         |
| gij148660879                 | serine hydroxymethyltransferase                                            | Cytoplasmic     |         |
| gij148660884                 | fumarate hydratase                                                         | Cytoplasmic     |         |
| gij148660908                 | 6-phosphogluconate dehydrogenase                                           | Cytoplasmic     |         |
| gij148660947                 | pterin-4-alpha-carbinolamine dehydratase                                   | Cytoplasmic     |         |
| gij148661035                 | alpha-ketoglutarate decarboxylase                                          | Cytoplasmic     |         |
| gij148661080                 | arginyl-tRNA synthetase                                                    | Cytoplasmic     |         |
| gij148661096                 | ATP synthase FOF1 subunit alpha                                            | Cytoplasmic     |         |
| gij148661112                 | acetyl-CoA acetyltransferase                                               | Cytoplasmic     |         |
| gij148661113                 | thioredoxin-related protein                                                | Cytoplasmic     |         |
| gij148661183                 | S-adenosylmethionine synthetase                                            | Cytoplasmic     |         |
| gij148661240                 | transaldolase                                                              | Cytoplasmic     |         |
| gij148661268                 | aconitate hydratase                                                        | Cytoplasmic     |         |
| gij148661273                 | hypothetical protein                                                       | Cytoplasmic     |         |
| gij148661276                 | 3-oxoacyl-ACP reductase                                                    | Cytoplasmic     |         |
| gij148661317                 | acyl-CoA synthetase                                                        | Cytoplasmic     |         |
| gij148661325                 | acyl-CoA synthetase                                                        | Cytoplasmic     |         |
| gij148661329                 | hypothetical protein                                                       | Cytoplasmic     |         |
| gij148661422                 | lipid-transfer protein                                                     | Cytoplasmic     |         |
| gij148661425                 | 30S ribosomal protein S1                                                   | Cytoplasmic     |         |
| gij148661454                 | argininosuccinate synthase                                                 | Cytoplasmic     |         |
| gij148661496                 | CTP synthetase                                                             | Cytoplasmic     |         |
| gij148661529                 | succinic semialdehyde dehydrogenase                                        | Cytoplasmic     |         |
| gij148661633                 | hypothetical protein                                                       | Cytoplasmic     |         |
| gij148661643                 | malate synthase G                                                          | Cytoplasmic     |         |
| gij148661733                 | fatty-acid--CoA ligase                                                     | Cytoplasmic     |         |
| gij148661816                 | 20-beta-hydroxysteroid dehydrogenase FabG3                                 | Cytoplasmic     |         |
| gij148661955                 | hypothetical protein                                                       | Cytoplasmic     |         |
| gij148661961                 | hypothetical protein                                                       | Cytoplasmic     |         |
| gij148661974                 | UDP-N-acetylmuramoylalanyl-D-glutamate--2,6-diaminopimelate ligase         | Cytoplasmic     |         |
| gij148661988                 | hypothetical protein                                                       | Cytoplasmic     |         |
| gij148662003                 | long-chain-fatty-acid--CoA ligase                                          | Cytoplasmic     |         |
| gij148662028                 | glycine cleavage system aminomethyltransferase T                           | Cytoplasmic     |         |
| gij148662032                 | dihydrolipoamide acetyltransferase                                         | Cytoplasmic     |         |
| gij148662038                 | glutamine synthetase                                                       | Cytoplasmic     |         |
| gij148662062                 | pyruvate dehydrogenase subunit E1                                          | Cytoplasmic     |         |
| gij148662065                 | acyl carrier protein                                                       | Cytoplasmic     |         |

|              |                                                                            |                      |  |
|--------------|----------------------------------------------------------------------------|----------------------|--|
| gij148662080 | transcriptional regulatory protein                                         | Cytoplasmic          |  |
| gij148662295 | ATP-dependent Clp protease proteolytic subunit                             | Cytoplasmic          |  |
| gij148662446 | pyridoxal biosynthesis lyase PdxS                                          | Cytoplasmic          |  |
| gij148662586 | hypothetical protein                                                       | Cytoplasmic          |  |
| gij148662625 | polynucleotide phosphorylase                                               | Cytoplasmic          |  |
| gij148662726 | ribosome recycling factor                                                  | Cytoplasmic          |  |
| gij148662733 | elongation factor Ts                                                       | Cytoplasmic          |  |
| gij148662734 | 30S ribosomal protein S2                                                   | Cytoplasmic          |  |
| gij148662753 | 30S ribosomal protein S16                                                  | Cytoplasmic          |  |
| gij148662787 | acyl-CoA synthetase                                                        | Cytoplasmic          |  |
| gij148662842 | glutamyl-tRNA synthetase                                                   | Cytoplasmic          |  |
| gij148662852 | ketol-acid reductoisomerase                                                | Cytoplasmic          |  |
| gij148662881 | electron transfer flavoprotein subunit beta                                | Cytoplasmic          |  |
| gij148662940 | zinc-type alcohol dehydrogenase AdhD                                       | Cytoplasmic          |  |
| gij148662971 | thiosulfate sulfurtransferase CysA3                                        | Cytoplasmic          |  |
| gij148662987 | two component transcriptional regulatory protein DevR                      | Cytoplasmic          |  |
| gij148662995 | acyl-CoA dehydrogenase                                                     | Cytoplasmic          |  |
| gij148663076 | isochorismate synthase EntC                                                | Cytoplasmic          |  |
| gij148663086 | short chain dehydrogenase                                                  | Cytoplasmic          |  |
| gij148663109 | two component sensory transduction transcriptional regulatory protein MtrA | Cytoplasmic          |  |
| gij148663111 | S-adenosyl-L-homocysteine hydrolase                                        | Cytoplasmic          |  |
| gij148663137 | acyl-CoA dehydrogenase                                                     | Cytoplasmic          |  |
| gij148663251 | hypothetical protein                                                       | Cytoplasmic          |  |
| gij148663281 | molecular chaperone GroEL                                                  | Cytoplasmic          |  |
| gij148663282 | co-chaperonin GroES                                                        | Cytoplasmic          |  |
| gij148663322 | DNA-directed RNA polymerase subunit alpha                                  | Cytoplasmic          |  |
| gij148663323 | 30S ribosomal protein S4                                                   | Cytoplasmic          |  |
| gij148663419 | acetyl-CoA acetyltransferase                                               | Cytoplasmic          |  |
| gij148663433 | 2-hydroxy-6-phenylhexa-2,4-dienoic acid hydrolase                          | Cytoplasmic          |  |
| gij148663444 | cysteinyl-tRNA synthetase                                                  | Cytoplasmic          |  |
| gij148663456 | hypothetical protein                                                       | Cytoplasmic          |  |
| gij148663491 | inorganic pyrophosphatase                                                  | Cytoplasmic          |  |
| gij148663669 | long-chain-fatty-acid-CoA ligase                                           | Cytoplasmic          |  |
| gij148663717 | hypothetical protein                                                       | Cytoplasmic          |  |
| gij148659921 | NAD(P) transhydrogenase subunit beta                                       | Cytoplasmic Membrane |  |
| gij148660013 | succinate dehydrogenase flavoprotein subunit                               | Cytoplasmic Membrane |  |
| gij148660104 | iron-sulfur-binding reductase                                              | Cytoplasmic Membrane |  |
| gij148660733 | transmembrane protein                                                      | Cytoplasmic Membrane |  |
| gij148660967 | hypothetical protein                                                       | Cytoplasmic Membrane |  |
| gij148661098 | ATP synthase F0F1 subunit beta                                             | Cytoplasmic Membrane |  |
| gij148661281 | hypothetical protein                                                       | Cytoplasmic Membrane |  |
| gij148661810 | hypothetical protein                                                       | Cytoplasmic Membrane |  |
| gij148662013 | ubiquinol-cytochrome C reductase QcrB                                      | Cytoplasmic Membrane |  |
| gij148662311 | NAD-dependent glutamate dehydrogenase Gdh                                  | Cytoplasmic Membrane |  |
| gij148663007 | NADH dehydrogenase subunit H                                               | Cytoplasmic Membrane |  |
| gij148663558 | hypothetical protein                                                       | Cytoplasmic Membrane |  |
| gij148663668 | polyketide synthase                                                        | Cytoplasmic Membrane |  |
| gij148660204 | short chain dehydrogenase                                                  | Unknown              |  |
| gij148660256 | phosphoglyceromutase                                                       | Unknown              |  |
| gij148660410 | (3R)-hydroxyacyl-ACP dehydratase subunit HadB                              | Unknown              |  |
| gij148660608 | hypothetical protein                                                       | Unknown              |  |
| gij148660661 | phosphoserine aminotransferase                                             | Unknown              |  |
| gij148660731 | succinyl-CoA synthetase subunit alpha                                      | Unknown              |  |
| gij148660988 | tetrahydrodipicolinate N-succinyltransferase                               | Unknown              |  |
| gij148661027 | malate dehydrogenase                                                       | Unknown              |  |
| gij148661094 | ATP synthase F0F1 subunit B                                                | Unknown              |  |
| gij148661431 | hypothetical protein                                                       | Unknown              |  |
| gij148661530 | hypothetical protein                                                       | Unknown              |  |
| gij148661956 | hypothetical protein                                                       | Unknown              |  |
| gij148662102 | dehydrogenase                                                              | Unknown              |  |
| gij148662385 | hypothetical protein                                                       | Unknown              |  |
| gij148662825 | 50S ribosomal protein L28                                                  | Unknown              |  |
| gij148663642 | enoyl-CoA hydratase                                                        | Unknown              |  |
| gij148663732 | hypothetical protein                                                       | Unknown              |  |
