# Supplementary material
Source: PubMed Central journal article supplement (PMC4256489)
Supplement: supp_M114.041962_mcp.M114.041962-6.pdf [file supp_M114.041962_mcp.M114.041962-6.pdf]

**Supplementary Table S4. Complete list of GO terms enriched in the Mycobacterium tuberculosis H37Ra acetylome.**

| Category           | GO_ID | Description                                                             | P-value  | Count | Cluster freq | Genes in test set                                                                                                                                                                                                                                                                                                                                                                                                                                                                                                                                                                                                                                                                                                                                                                                                                                                                                                                                                                                                                                                                                                              |
|--------------------|-------|-------------------------------------------------------------------------|----------|-------|--------------|--------------------------------------------------------------------------------------------------------------------------------------------------------------------------------------------------------------------------------------------------------------------------------------------------------------------------------------------------------------------------------------------------------------------------------------------------------------------------------------------------------------------------------------------------------------------------------------------------------------------------------------------------------------------------------------------------------------------------------------------------------------------------------------------------------------------------------------------------------------------------------------------------------------------------------------------------------------------------------------------------------------------------------------------------------------------------------------------------------------------------------|
| Cellular Component | 5622  | intracellular                                                           | 1.01E-07 | 46    | 35.38%       | 662987 148660118 148660426 148662065 148662028 148661974 148661080 148660799 14865975 148660879 148662734 148662733 148661240 148660205 148661454 148662625 148660475                                                                                                                                                                                                                                                                                                                                                                                                                                                                                                                                                                                                                                                                                                                                                                                                                                                                                                                                                          |
| Cellular Component | 5737  | cytoplasm                                                               | 1.63E-09 | 41    | 31.54%       | 660118 148660426 148662065 148661974 148662028 148661080 148660799 148659975 148660879 148662734 148662733 148661240 148660205 148661454 148662625 148660475 148660674                                                                                                                                                                                                                                                                                                                                                                                                                                                                                                                                                                                                                                                                                                                                                                                                                                                                                                                                                         |
| Biological Process | 6084  | acetyl-CoA metabolic process                                            | 6.31E-07 | 8     | 6.15%        | 148660730 148661027 148659826 148660667 148660674 148661643 148661035 148660884                                                                                                                                                                                                                                                                                                                                                                                                                                                                                                                                                                                                                                                                                                                                                                                                                                                                                                                                                                                                                                                |
| Biological Process | 6091  | generation of precursor metabolites and energy                          | 6.90E-08 | 15    | 11.54%       | 660730 148660256 148660129 148659826 148661094 148662013 148660884                                                                                                                                                                                                                                                                                                                                                                                                                                                                                                                                                                                                                                                                                                                                                                                                                                                                                                                                                                                                                                                             |
| Biological Process | 6099  | tricarboxylic acid cycle                                                | 6.31E-07 | 8     | 6.15%        | 148660730 148661027 148659826 148660667 148660674 148661643 148661035 148660884                                                                                                                                                                                                                                                                                                                                                                                                                                                                                                                                                                                                                                                                                                                                                                                                                                                                                                                                                                                                                                                |
| Biological Process | 6412  | translation                                                             | 9.37E-05 | 15    | 11.54%       | 660426 148663323 148661080 148662825 148662734 148662733 148662726                                                                                                                                                                                                                                                                                                                                                                                                                                                                                                                                                                                                                                                                                                                                                                                                                                                                                                                                                                                                                                                             |
| Biological Process | 6457  | protein folding                                                         | 4.50E-04 | 5     | 3.85%        | 148660205 148660118 148663282 148663281 148660116                                                                                                                                                                                                                                                                                                                                                                                                                                                                                                                                                                                                                                                                                                                                                                                                                                                                                                                                                                                                                                                                              |
| Biological Process | 8150  | biological_process                                                      | 6.51E-04 | 117   | 90.00%       | 660426 148662065 148660116 148661956 148661240 148663642 148661454 148661643 148662787 148662311 148663109 148660129 148660410 148660416 148660947 148660228 148662753 148660036 148661422 148661183 148661425 148660035 148662446 148660233 148661974 148660799 148661080 148659975 148661113 148660442 148660441 148661112 148663076 148662625 148661816 148661098 148661431 148661096 148663668 148660636 148663669 148660637 148660172 148660104 148659826 148662032 148659995 148661094 148661810 148662038 148662825 148661027 148660460 148660667 148662940 148662295 148660661 148660730 148660256 148660731 148659912 148662028 148660879 148663419 148662734 148662733 148663007 148661496 148660458 148661035 148660459 148662842 148663086 148660908 148663282 148663281 148661317 148662013 148663491 148660602 148660884 148661276 148661733 148663137 148661329 148662080 148661325 148662852 148662003 148662102 148660205 148660475 148661529 148660203 148660674 148660204 148660009 148660007 148661268 148659759 148660331 148662995 148659921 148660529 148661530 148662385 148663322 148663323 148662726 |
| Biological Process | 8152  | metabolic process                                                       | 3.19E-06 | 113   | 86.92%       | 660426 148662065 148660116 148661956 148661240 148663642 148661454 148661643 148662787 148662311 148660129 148660410 148660416 148660947 148660228 148662753 148660036 148661422 148661183 148661425 148660035 148662446 148660233 148661974 148660799 148661080 148659975 148661113 148660442 148660441 148661112 148663076 148662625 14866                                                                                                                                                                                                                                                                                                                                                                                                                                                                                                                                                                                                                                                                                                                                                                                   |
| Biological Process | 9060  | aerobic respiration                                                     | 1.80E-06 | 8     | 6.15%        | 148660730 148661027 148659826 148660667 148660674 148661643 148661035 148660884                                                                                                                                                                                                                                                                                                                                                                                                                                                                                                                                                                                                                                                                                                                                                                                                                                                                                                                                                                                                                                                |
| Biological Process | 9109  | coenzyme catabolic process                                              | 1.09E-06 | 8     | 6.15%        | 148660730 148661027 148659826 148660667 148660674 148661643 148661035 148660884                                                                                                                                                                                                                                                                                                                                                                                                                                                                                                                                                                                                                                                                                                                                                                                                                                                                                                                                                                                                                                                |
| Biological Process | 15980 | energy derivation by oxidation of organic compounds                     | 5.33E-05 | 9     | 6.92%        | 660884                                                                                                                                                                                                                                                                                                                                                                                                                                                                                                                                                                                                                                                                                                                                                                                                                                                                                                                                                                                                                                                                                                                         |
| Molecular Function | 16874 | ligase activity                                                         | 1.06E-04 | 17    | 13.08%       | 662842 148660320 148660731 148661325 148661317 148661974 148661080 148662038 148662                                                                                                                                                                                                                                                                                                                                                                                                                                                                                                                                                                                                                                                                                                                                                                                                                                                                                                                                                                                                                                            |
| Biological Process | 19538 | protein metabolic process                                               | 1.11E-03 | 23    | 17.69%       | 660459 148663444 148662842 148660118 148660426 148663282 148663323 148663281 148660                                                                                                                                                                                                                                                                                                                                                                                                                                                                                                                                                                                                                                                                                                                                                                                                                                                                                                                                                                                                                                            |
| Biological Process | 44267 | cellular protein metabolic process                                      | 7.94E-05 | 21    | 16.15%       | 663444 148662842 148660118 148660426 148663282 148663323 148663281 148660116 148661                                                                                                                                                                                                                                                                                                                                                                                                                                                                                                                                                                                                                                                                                                                                                                                                                                                                                                                                                                                                                                            |
| Cellular Component | 44424 | intracellular part                                                      | 3.21E-10 | 44    | 33.85%       | 660118 148660426 148662065 148662028 148661974 148661080 148660799 148659975 148660879 148662734 148662733 148661240 148660205 148661454 148662625 148660475 148661098                                                                                                                                                                                                                                                                                                                                                                                                                                                                                                                                                                                                                                                                                                                                                                                                                                                                                                                                                         |
| Biological Process | 45333 | cellular respiration                                                    | 7.71E-06 | 9     | 6.92%        | 660884                                                                                                                                                                                                                                                                                                                                                                                                                                                                                                                                                                                                                                                                                                                                                                                                                                                                                                                                                                                                                                                                                                                         |
| Biological Process | 46356 | acetyl-CoA catabolic process                                            | 6.31E-07 | 8     | 6.15%        | 148660730 148661027 148659826 148660667 148660674 148661643 148661035 148660884                                                                                                                                                                                                                                                                                                                                                                                                                                                                                                                                                                                                                                                                                                                                                                                                                                                                                                                                                                                                                                                |
| Molecular Function | 46912 | transferase activity, transferring acyl groups, acyl groups converted i | 9.11E-05 | 4     | 3.08%        | 148660731 148660667 148660674 148661643                                                                                                                                                                                                                                                                                                                                                                                                                                                                                                                                                                                                                                                                                                                                                                                                                                                                                                                                                                                                                                                                                        |
| Biological Process | 51187 | cofactor catabolic process                                              | 1.09E-06 | 8     | 6.15%        | 148660730 148661027 148659826 148660667 148660674 148661643 148661035 148660884                                                                                                                                                                                                                                                                                                                                                                                                                                                                                                                                                                                                                                                                                                                                                                                                                                                                                                                                                                                                                                                |
