# Supplementary material
Source: PubMed Central journal article supplement (PMC4256489)
Supplement: supp_M114.041962_mcp.M114.041962-7.pdf [file supp_M114.041962_mcp.M114.041962-7.pdf]

## Supplementary Table S5. Complete list of KEGG pathways in the identified acetylated proteins.

### **mra01100 Metabolic pathways - Mycobacterium tuberculosis H37Ra (59)**

|              |          |        |                                              |
|--------------|----------|--------|----------------------------------------------|
| gi 148659759 | MRA_0002 | dnaN;  | DNA polymerase III subunit beta              |
| gi 148659826 | MRA_0068 | icd2;  | isocitrate dehydrogenase (NADP) Icd2         |
| gi 148659921 | MRA_0165 | pntB;  | NAD(P) transhydrogenase subunit beta         |
| gi 148659975 | MRA_0219 | pckA;  | phosphoenolpyruvate carboxykinase            |
| gi 148659995 | MRA_0239 | fadE4; | acyl-CoA dehydrogenase                       |
| gi 148660007 | MRA_0251 | fabG;  | 3-ketoacyl-ACP reductase                     |
| gi 148660013 | MRA_0257 | sdhA;  | succinate dehydrogenase flavoprotein subunit |
| gi 148660129 | MRA_0372 | fba;   | fructose-bisphosphate aldolase               |
| gi 148660228 | MRA_0468 | lpd;   | dihydrolipoamide dehydrogenase               |
| gi 148660233 | MRA_0473 | icl;   | isocitrate lyase Icl                         |
| gi 148660256 | MRA_0496 | gpmA;  | phosphoglyceromutase                         |
| gi 148660441 | MRA_0676 | rpoB;  | DNA-directed RNA polymerase subunit beta     |
| gi 148660442 | MRA_0677 | rpoC;  | DNA-directed RNA polymerase subunit beta'    |
| gi 148660529 | MRA_0762 | mmsA;  | MmsA                                         |
| gi 148660593 | MRA_0825 | cysA2; | thiosulfate sulfurtransferase CysA2          |
| gi 148660636 | MRA_0867 | fadA;  | acetyl-CoA acetyltransferase                 |
| gi 148660637 | MRA_0868 | fadB;  | fatty oxidation complex subunit alpha        |
| gi 148660661 | MRA_0891 | serC;  | phosphoserine aminotransferase               |
| gi 148660667 | MRA_0897 | citA;  | citrate synthase 2                           |
| gi 148660674 | MRA_0904 | gltA;  | type II citrate synthase                     |
| gi 148660730 | MRA_0958 | sucC;  | succinyl-CoA synthetase subunit beta         |
| gi 148660731 | MRA_0959 | sucD;  | succinyl-CoA synthetase subunit alpha        |
| gi 148660799 | MRA_1025 | prsA;  | ribose-phosphate pyrophosphokinase           |
| gi 148660879 | MRA_1104 | glyA;  | serine hydroxymethyltransferase              |
| gi 148660884 | MRA_1109 | fumC;  | fumarate hydratase                           |
| gi 148660908 | MRA_1131 | gnd2;  | 6-phosphogluconate dehydrogenase             |
| gi 148660988 | MRA_1210 |        | tetrahydrodipicolinate N-succinyltransferase |
| gi 148661027 | MRA_1249 | mdh;   | malate dehydrogenase                         |

|              |          |          |                                                   |
|--------------|----------|----------|---------------------------------------------------|
| gi 148661094 | MRA_1314 | atpF;    | ATP synthase F0F1 subunit B                       |
| gi 148661096 | MRA_1316 | atpA;    | ATP synthase F0F1 subunit alpha                   |
| gi 148661098 | MRA_1318 | atpD;    | ATP synthase F0F1 subunit beta                    |
| gi 148661112 | MRA_1331 | fadA4;   | acetyl-CoA acetyltransferase                      |
| gi 148661183 | MRA_1401 | metK;    | S-adenosylmethionine synthetase                   |
| gi 148661240 | MRA_1457 | tal;     | transaldolase                                     |
| gi 148661268 | MRA_1485 | acn;     | aconitate hydratase                               |
| gi 148661454 | MRA_1669 | argG;    | argininosuccinate synthase                        |
| gi 148661496 | MRA_1708 | pyrG;    | CTP synthetase                                    |
| gi 148661529 | MRA_1741 | gabD2;   | succinic semialdehyde dehydrogenase               |
| gi 148661643 | MRA_1848 | glcB;    | malate synthase G                                 |
| gi 148661816 | MRA_2018 | fabG3-1; | 20-beta-hydroxysteroid dehydrogenase FabG3        |
| gi 148662003 | MRA_2202 | fadD15;  | long-chain-fatty-acid--CoA ligase                 |
| gi 148662013 | MRA_2212 | qcrB;    | ubiquinol-cytochrome C reductase QcrB             |
| gi 148662028 | MRA_2227 | gcvT;    | glycine cleavage system aminomethyltransferase T  |
| gi 148662032 | MRA_2231 | dlaT;    | dihydrolipoamide acetyltransferase                |
| gi 148662038 | MRA_2237 | glnA1;   | glutamine synthetase                              |
| gi 148662062 | MRA_2261 | aceE;    | pyruvate dehydrogenase subunit E1                 |
| gi 148662311 | MRA_2501 | gdh;     | NAD-dependent glutamate dehydrogenase Gdh         |
| gi 148662842 | MRA_3021 | gltX;    | glutamyl-tRNA synthetase                          |
| gi 148662852 | MRA_3031 | ilvC;    | ketol-acid reductoisomerase                       |
| gi 148662940 | MRA_3118 | adhD;    | zinc-type alcohol dehydrogenase AdhD              |
| gi 148662971 | MRA_3149 | cysA3;   | thiosulfate sulfurtransferase CysA3               |
| gi 148662995 | MRA_3173 | fadE23;  | acyl-CoA dehydrogenase                            |
| gi 148663007 | MRA_3185 | nuoH;    | NADH dehydrogenase subunit H                      |
| gi 148663076 | MRA_3254 | entC;    | isochorismate synthase EntC                       |
| gi 148663111 | MRA_3289 | sahH;    | S-adenosyl-L-homocysteine hydrolase               |
| gi 148663322 | MRA_3498 | rpoA;    | DNA-directed RNA polymerase subunit alpha         |
| gi 148663419 | MRA_3595 | fadA6;   | acetyl-CoA acetyltransferase                      |
| gi 148663433 | MRA_3608 | bphD;    | 2-hydroxy-6-phenylhexa-2,4-dienoic acid hydrolase |
| gi 148663642 | MRA_3814 | echA21;  | enoyl-CoA hydratase                               |

**mra01110 Biosynthesis of secondary metabolites - Mycobacterium tuberculosis H37Ra (36)**

|              |          |        |                                              |
|--------------|----------|--------|----------------------------------------------|
| gi 148659826 | MRA_0068 | icd2;  | isocitrate dehydrogenase (NADP) Icd2         |
| gi 148659975 | MRA_0219 | pckA;  | phosphoenolpyruvate carboxykinase            |
| gi 148659995 | MRA_0239 | fadE4; | acyl-CoA dehydrogenase                       |
| gi 148660009 | MRA_0253 | fadE5; | acyl-CoA dehydrogenase                       |
| gi 148660013 | MRA_0257 | sdhA;  | succinate dehydrogenase flavoprotein subunit |
| gi 148660036 | MRA_0279 | fadE6; | acyl-CoA dehydrogenase                       |
| gi 148660129 | MRA_0372 | fba;   | fructose-bisphosphate aldolase               |
| gi 148660228 | MRA_0468 | lpd;   | dihydrolipoamide dehydrogenase               |
| gi 148660256 | MRA_0496 | gpmA;  | phosphoglyceromutase                         |
| gi 148660331 | MRA_0569 | grcC1; | polyprenyl-diphosphate synthase GrcC1        |
| gi 148660636 | MRA_0867 | fadA;  | acetyl-CoA acetyltransferase                 |
| gi 148660637 | MRA_0868 | fadB;  | fatty oxidation complex subunit alpha        |
| gi 148660667 | MRA_0897 | citA;  | citrate synthase 2                           |
| gi 148660674 | MRA_0904 | gltA;  | type II citrate synthase                     |
| gi 148660730 | MRA_0958 | sucC;  | succinyl-CoA synthetase subunit beta         |
| gi 148660731 | MRA_0959 | sucD;  | succinyl-CoA synthetase subunit alpha        |
| gi 148660799 | MRA_1025 | prsA;  | ribose-phosphate pyrophosphokinase           |
| gi 148660879 | MRA_1104 | glyA;  | serine hydroxymethyltransferase              |
| gi 148660884 | MRA_1109 | fumC;  | fumarate hydratase                           |
| gi 148660908 | MRA_1131 | gnd2;  | 6-phosphogluconate dehydrogenase             |
| gi 148661027 | MRA_1249 | mdh;   | malate dehydrogenase                         |
| gi 148661112 | MRA_1331 | fadA4; | acetyl-CoA acetyltransferase                 |
| gi 148661183 | MRA_1401 | metK;  | S-adenosylmethionine synthetase              |
| gi 148661240 | MRA_1457 | tal;   | transaldolase                                |
| gi 148661268 | MRA_1485 | acn;   | aconitate hydratase                          |
| gi 148661454 | MRA_1669 | argG;  | argininosuccinate synthase                   |
| gi 148662032 | MRA_2231 | dlaT;  | dihydrolipoamide acetyltransferase           |
| gi 148662062 | MRA_2261 | aceE;  | pyruvate dehydrogenase subunit E1            |
| gi 148662842 | MRA_3021 | gltX;  | glutamyl-tRNA synthetase                     |
| gi 148662852 | MRA_3031 | ilvC;  | ketol-acid reductoisomerase                  |
| gi 148662940 | MRA_3118 | adhD;  | zinc-type alcohol dehydrogenase AdhD         |

gi|148662995 MRA\_3173 fadE23; acyl-CoA dehydrogenase  
gi|148663076 MRA\_3254 entC; isochorismate synthase EntC  
gi|148663137 MRA\_3315 fadE25; acyl-CoA dehydrogenase  
gi|148663419 MRA\_3595 fadA6; acetyl-CoA acetyltransferase  
gi|148663642 MRA\_3814 echA21; enoyl-CoA hydratase

**mra01120 Microbial metabolism in diverse environments - Mycobacterium tuberculosis H37Ra (32)**

gi|148659826 MRA\_0068 icd2; isocitrate dehydrogenase (NADP) Icd2  
gi|148659975 MRA\_0219 pckA; phosphoenolpyruvate carboxykinase  
gi|148660013 MRA\_0257 sdhA; succinate dehydrogenase flavoprotein subunit  
gi|148660129 MRA\_0372 fba; fructose-bisphosphate aldolase  
gi|148660228 MRA\_0468 lpd; dihydrolipoamide dehydrogenase  
gi|148660233 MRA\_0473 icl; isocitrate lyase Icl  
gi|148660256 MRA\_0496 gpmA; phosphoglyceromutase  
gi|148660636 MRA\_0867 fadA; acetyl-CoA acetyltransferase  
gi|148660637 MRA\_0868 fadB; fatty oxidation complex subunit alpha  
gi|148660661 MRA\_0891 serC; phosphoserine aminotransferase  
gi|148660667 MRA\_0897 citA; citrate synthase 2  
gi|148660674 MRA\_0904 gltA; type II citrate synthase  
gi|148660730 MRA\_0958 sucC; succinyl-CoA synthetase subunit beta  
gi|148660731 MRA\_0959 sucD; succinyl-CoA synthetase subunit alpha  
gi|148660799 MRA\_1025 prsA; ribose-phosphate pyrophosphokinase  
gi|148660879 MRA\_1104 glyA; serine hydroxymethyltransferase  
gi|148660884 MRA\_1109 fumC; fumarate hydratase  
gi|148660908 MRA\_1131 gnd2; 6-phosphogluconate dehydrogenase  
gi|148660988 MRA\_1210 tetrahydrodipicolinate N-succinyltransferase  
gi|148661027 MRA\_1249 mdh; malate dehydrogenase  
gi|148661112 MRA\_1331 fadA4; acetyl-CoA acetyltransferase  
gi|148661240 MRA\_1457 tal; transaldolase  
gi|148661268 MRA\_1485 acn; aconitate hydratase  
gi|148661529 MRA\_1741 gabD2; succinic semialdehyde dehydrogenase  
gi|148661643 MRA\_1848 glcB; malate synthase G

gi|148662032 MRA\_2231 dlaT; dihydrolipoamide acetyltransferase  
gi|148662038 MRA\_2237 glnA1; glutamine synthetase  
gi|148662062 MRA\_2261 aceE; pyruvate dehydrogenase subunit E1  
gi|148662940 MRA\_3118 adhD; zinc-type alcohol dehydrogenase AdhD  
gi|148663419 MRA\_3595 fadA6; acetyl-CoA acetyltransferase  
gi|148663433 MRA\_3608 bphD; 2-hydroxy-6-phenylhexa-2,4-dienoic acid hydrolase  
gi|148663642 MRA\_3814 echA21; enoyl-CoA hydratase

**mra00020 Citrate cycle (TCA cycle) - Mycobacterium tuberculosis H37Ra (13)**

gi|148659826 MRA\_0068 icd2; isocitrate dehydrogenase (NADP) Icd2  
gi|148659975 MRA\_0219 pckA; phosphoenolpyruvate carboxykinase  
gi|148660013 MRA\_0257 sdhA; succinate dehydrogenase flavoprotein subunit  
gi|148660228 MRA\_0468 lpd; dihydrolipoamide dehydrogenase  
gi|148660667 MRA\_0897 citA; citrate synthase 2  
gi|148660674 MRA\_0904 gltA; type II citrate synthase  
gi|148660730 MRA\_0958 sucC; succinyl-CoA synthetase subunit beta  
gi|148660731 MRA\_0959 sucD; succinyl-CoA synthetase subunit alpha  
gi|148660884 MRA\_1109 fumC; fumarate hydratase  
gi|148661027 MRA\_1249 mdh; malate dehydrogenase  
gi|148661268 MRA\_1485 acn; aconitate hydratase  
gi|148662032 MRA\_2231 dlaT; dihydrolipoamide acetyltransferase  
gi|148662062 MRA\_2261 aceE; pyruvate dehydrogenase subunit E1

**mra00640 Propanoate metabolism - Mycobacterium tuberculosis H37Ra (10)**

gi|148659995 MRA\_0239 fadE4; acyl-CoA dehydrogenase  
gi|148660529 MRA\_0762 mmsA; MmsA  
gi|148660636 MRA\_0867 fadA; acetyl-CoA acetyltransferase  
gi|148660637 MRA\_0868 fadB; fatty oxidation complex subunit alpha  
gi|148660730 MRA\_0958 sucC; succinyl-CoA synthetase subunit beta  
gi|148660731 MRA\_0959 sucD; succinyl-CoA synthetase subunit alpha  
gi|148661112 MRA\_1331 fadA4; acetyl-CoA acetyltransferase  
gi|148662995 MRA\_3173 fadE23; acyl-CoA dehydrogenase

gi|148663419 MRA\_3595 fadA6; acetyl-CoA acetyltransferase  
gi|148663642 MRA\_3814 echA21; enoyl-CoA hydratase

**mra00280 Valine, leucine and isoleucine degradation - Mycobacterium tuberculosis H37Ra (9)**

gi|148659995 MRA\_0239 fadE4; acyl-CoA dehydrogenase  
gi|148660228 MRA\_0468 lpd; dihydrolipoamide dehydrogenase  
gi|148660529 MRA\_0762 mmsA; MmsA  
gi|148660636 MRA\_0867 fadA; acetyl-CoA acetyltransferase  
gi|148660637 MRA\_0868 fadB; fatty oxidation complex subunit alpha  
gi|148661112 MRA\_1331 fadA4; acetyl-CoA acetyltransferase  
gi|148662995 MRA\_3173 fadE23; acyl-CoA dehydrogenase  
gi|148663419 MRA\_3595 fadA6; acetyl-CoA acetyltransferase  
gi|148663642 MRA\_3814 echA21; enoyl-CoA hydratase

**mra00071 Fatty acid metabolism - Mycobacterium tuberculosis H37Ra (9)**

gi|148659995 MRA\_0239 fadE4; acyl-CoA dehydrogenase  
gi|148660636 MRA\_0867 fadA; acetyl-CoA acetyltransferase  
gi|148660637 MRA\_0868 fadB; fatty oxidation complex subunit alpha  
gi|148661112 MRA\_1331 fadA4; acetyl-CoA acetyltransferase  
gi|148662003 MRA\_2202 fadD15; long-chain-fatty-acid--CoA ligase  
gi|148662940 MRA\_3118 adhD; zinc-type alcohol dehydrogenase AdhD  
gi|148662995 MRA\_3173 fadE23; acyl-CoA dehydrogenase  
gi|148663419 MRA\_3595 fadA6; acetyl-CoA acetyltransferase  
gi|148663642 MRA\_3814 echA21; enoyl-CoA hydratase

**mra00630 Glyoxylate and dicarboxylate metabolism - Mycobacterium tuberculosis H37Ra (11)**

gi|148660233 MRA\_0473 icl; isocitrate lyase Icl  
gi|148660636 MRA\_0867 fadA; acetyl-CoA acetyltransferase  
gi|148660667 MRA\_0897 citA; citrate synthase 2  
gi|148660674 MRA\_0904 gltA; type II citrate synthase  
gi|148660879 MRA\_1104 glyA; serine hydroxymethyltransferase  
gi|148661027 MRA\_1249 mdh; malate dehydrogenase

gi|148661112 MRA\_1331 fadA4; acetyl-CoA acetyltransferase  
gi|148661268 MRA\_1485 acn; aconitate hydratase  
gi|148661643 MRA\_1848 glcB; malate synthase G  
gi|148662038 MRA\_2237 glnA1; glutamine synthetase  
gi|148663419 MRA\_3595 fadA6; acetyl-CoA acetyltransferase

**mra00650 Butanoate metabolism - Mycobacterium tuberculosis H37Ra (8)**

gi|148660013 MRA\_0257 sdhA; succinate dehydrogenase flavoprotein subunit  
gi|148660636 MRA\_0867 fadA; acetyl-CoA acetyltransferase  
gi|148660637 MRA\_0868 fadB; fatty oxidation complex subunit alpha  
gi|148661112 MRA\_1331 fadA4; acetyl-CoA acetyltransferase  
gi|148661529 MRA\_1741 gabD2; succinic semialdehyde dehydrogenase  
gi|148662062 MRA\_2261 aceE; pyruvate dehydrogenase subunit E1  
gi|148663419 MRA\_3595 fadA6; acetyl-CoA acetyltransferase  
gi|148663642 MRA\_3814 echA21; enoyl-CoA hydratase

**mra00310 Lysine degradation - Mycobacterium tuberculosis H37Ra (6)**

gi|148660636 MRA\_0867 fadA; acetyl-CoA acetyltransferase  
gi|148660637 MRA\_0868 fadB; fatty oxidation complex subunit alpha  
gi|148661112 MRA\_1331 fadA4; acetyl-CoA acetyltransferase  
gi|148662032 MRA\_2231 dlaT; dihydrolipoamide acetyltransferase  
gi|148663419 MRA\_3595 fadA6; acetyl-CoA acetyltransferase  
gi|148663642 MRA\_3814 echA21; enoyl-CoA hydratase

**mra03010 Ribosome - Mycobacterium tuberculosis H37Ra (8)**

gi|148660426 MRA\_0663 rplL; 50S ribosomal protein L7/L12  
gi|148660458 MRA\_0692 rpsG; 30S ribosomal protein S7  
gi|148660475 MRA\_0708 rpsJ; 30S ribosomal protein S10  
gi|148661425 MRA\_1640 rpsA; 30S ribosomal protein S1  
gi|148662734 MRA\_2915 rpsB; 30S ribosomal protein S2  
gi|148662753 MRA\_2934 rpsP; 30S ribosomal protein S16  
gi|148662825 MRA\_3004 rpmB; 50S ribosomal protein L28

gi|148663323 MRA\_3499 rpsD; 30S ribosomal protein S4

**mra00620 Pyruvate metabolism - Mycobacterium tuberculosis H37Ra (8)**

gi|148659975 MRA\_0219 pckA; phosphoenolpyruvate carboxykinase  
gi|148660228 MRA\_0468 lpd; dihydrolipoamide dehydrogenase  
gi|148660636 MRA\_0867 fadA; acetyl-CoA acetyltransferase  
gi|148661027 MRA\_1249 mdh; malate dehydrogenase  
gi|148661112 MRA\_1331 fadA4; acetyl-CoA acetyltransferase  
gi|148661643 MRA\_1848 glcB; malate synthase G  
gi|148662062 MRA\_2261 aceE; pyruvate dehydrogenase subunit E1  
gi|148663419 MRA\_3595 fadA6; acetyl-CoA acetyltransferase

**mra00380 Tryptophan metabolism - Mycobacterium tuberculosis H37Ra (5)**

gi|148660636 MRA\_0867 fadA; acetyl-CoA acetyltransferase  
gi|148660637 MRA\_0868 fadB; fatty oxidation complex subunit alpha  
gi|148661112 MRA\_1331 fadA4; acetyl-CoA acetyltransferase  
gi|148663419 MRA\_3595 fadA6; acetyl-CoA acetyltransferase  
gi|148663642 MRA\_3814 echA21; enoyl-CoA hydratase

**mra00410 beta-Alanine metabolism - Mycobacterium tuberculosis H37Ra (5)**

gi|148659995 MRA\_0239 fadE4; acyl-CoA dehydrogenase  
gi|148660529 MRA\_0762 mmsA; MmsA  
gi|148660637 MRA\_0868 fadB; fatty oxidation complex subunit alpha  
gi|148662995 MRA\_3173 fadE23; acyl-CoA dehydrogenase  
gi|148663642 MRA\_3814 echA21; enoyl-CoA hydratase

**mra00281 Geraniol degradation - Mycobacterium tuberculosis H37Ra (5)**

gi|148660009 MRA\_0253 fadE5; acyl-CoA dehydrogenase  
gi|148660036 MRA\_0279 fadE6; acyl-CoA dehydrogenase  
gi|148660637 MRA\_0868 fadB; fatty oxidation complex subunit alpha  
gi|148663137 MRA\_3315 fadE25; acyl-CoA dehydrogenase  
gi|148663642 MRA\_3814 echA21; enoyl-CoA hydratase

**mra00190 Oxidative phosphorylation - Mycobacterium tuberculosis H37Ra (7)**

gi|148660013 MRA\_0257 sdhA; succinate dehydrogenase flavoprotein subunit  
gi|148661094 MRA\_1314 atpF; ATP synthase F0F1 subunit B  
gi|148661096 MRA\_1316 atpA; ATP synthase F0F1 subunit alpha  
gi|148661098 MRA\_1318 atpD; ATP synthase F0F1 subunit beta  
gi|148662013 MRA\_2212 qcrB; ubiquinol-cytochrome C reductase QcrB  
gi|148663007 MRA\_3185 nuoH; NADH dehydrogenase subunit H  
gi|148663491 MRA\_3664 ppa; inorganic pyrophosphatase

**mra02020 Two-component system - Mycobacterium tuberculosis H37Ra (6)**

gi|148660636 MRA\_0867 fadA; acetyl-CoA acetyltransferase  
gi|148661112 MRA\_1331 fadA4; acetyl-CoA acetyltransferase  
gi|148662038 MRA\_2237 glnA1; glutamine synthetase  
gi|148662987 MRA\_3165 devR; two component transcriptional regulatory protein DevR  
gi|148663109 MRA\_3287 mtrA; two component sensory transduction transcriptional regulatory protein MtrA  
gi|148663419 MRA\_3595 fadA6; acetyl-CoA acetyltransferase

**mra00362 Benzoate degradation - Mycobacterium tuberculosis H37Ra (4)**

gi|148660636 MRA\_0867 fadA; acetyl-CoA acetyltransferase  
gi|148661112 MRA\_1331 fadA4; acetyl-CoA acetyltransferase  
gi|148663419 MRA\_3595 fadA6; acetyl-CoA acetyltransferase  
gi|148663642 MRA\_3814 echA21; enoyl-CoA hydratase

**mra00240 Pyrimidine metabolism - Mycobacterium tuberculosis H37Ra (6)**

gi|148659759 MRA\_0002 dnaN; DNA polymerase III subunit beta  
gi|148660441 MRA\_0676 rpoB; DNA-directed RNA polymerase subunit beta  
gi|148660442 MRA\_0677 rpoC; DNA-directed RNA polymerase subunit beta'  
gi|148661496 MRA\_1708 pyrG; CTP synthetase  
gi|148662625 MRA\_2807 gpsI; polynucleotide phosphorylase  
gi|148663322 MRA\_3498 rpoA; DNA-directed RNA polymerase subunit alpha

**mra00010 Glycolysis / Gluconeogenesis - Mycobacterium tuberculosis H37Ra (6)**

gi|148659975 MRA\_0219 pckA; phosphoenolpyruvate carboxykinase  
gi|148660129 MRA\_0372 fba; fructose-bisphosphate aldolase  
gi|148660228 MRA\_0468 lpd; dihydrolipoamide dehydrogenase  
gi|148660256 MRA\_0496 gpmA; phosphoglyceromutase  
gi|148662062 MRA\_2261 aceE; pyruvate dehydrogenase subunit E1  
gi|148662940 MRA\_3118 adhD; zinc-type alcohol dehydrogenase AdhD

**mra00230 Purine metabolism - Mycobacterium tuberculosis H37Ra (6)**

gi|148659759 MRA\_0002 dnaN; DNA polymerase III subunit beta  
gi|148660441 MRA\_0676 rpoB; DNA-directed RNA polymerase subunit beta  
gi|148660442 MRA\_0677 rpoC; DNA-directed RNA polymerase subunit beta'  
gi|148660799 MRA\_1025 prsA; ribose-phosphate pyrophosphokinase  
gi|148662625 MRA\_2807 gpsI; polynucleotide phosphorylase  
gi|148663322 MRA\_3498 rpoA; DNA-directed RNA polymerase subunit alpha

**mra00680 Methane metabolism - Mycobacterium tuberculosis H37Ra (6)**

gi|148660129 MRA\_0372 fba; fructose-bisphosphate aldolase  
gi|148660256 MRA\_0496 gpmA; phosphoglyceromutase  
gi|148660661 MRA\_0891 serC; phosphoserine aminotransferase  
gi|148660879 MRA\_1104 glyA; serine hydroxymethyltransferase  
gi|148661027 MRA\_1249 mdh; malate dehydrogenase  
gi|148662940 MRA\_3118 adhD; zinc-type alcohol dehydrogenase AdhD

**mra00910 Nitrogen metabolism - Mycobacterium tuberculosis H37Ra (5)**

gi|148662028 MRA\_2227 gcvT; glycine cleavage system aminomethyltransferase T  
gi|148662038 MRA\_2237 glnA1; glutamine synthetase  
gi|148662311 MRA\_2501 gdh; NAD-dependent glutamate dehydrogenase Gdh  
gi|148662881 MRA\_3060 fixA; electron transfer flavoprotein subunit beta  
gi|148663007 MRA\_3185 nuoH; NADH dehydrogenase subunit H

**mra00260 Glycine, serine and threonine metabolism - Mycobacterium tuberculosis H37Ra (5)**

gi|148660228 MRA\_0468 lpd; dihydrolipoamide dehydrogenase  
gi|148660256 MRA\_0496 gpmA; phosphoglyceromutase  
gi|148660661 MRA\_0891 serC; phosphoserine aminotransferase  
gi|148660879 MRA\_1104 glyA; serine hydroxymethyltransferase  
gi|148662028 MRA\_2227 gcvT; glycine cleavage system aminomethyltransferase T

**mra03018 RNA degradation - Mycobacterium tuberculosis H37Ra (4)**

gi|148660116 MRA\_0359 dnaK; molecular chaperone DnaK  
gi|148660205 MRA\_0445 groEL; molecular chaperone GroEL  
gi|148662625 MRA\_2807 gpsI; polynucleotide phosphorylase  
gi|148663281 MRA\_3457 groEL; molecular chaperone GroEL

**mra00903 Limonene and pinene degradation - Mycobacterium tuberculosis H37Ra (2)**

gi|148660637 MRA\_0868 fadB; fatty oxidation complex subunit alpha  
gi|148663642 MRA\_3814 echA21; enoyl-CoA hydratase

**mra00270 Cysteine and methionine metabolism - Mycobacterium tuberculosis H37Ra (4)**

gi|148660593 MRA\_0825 cysA2; thiosulfate sulfurtransferase CysA2  
gi|148661183 MRA\_1401 metK; S-adenosylmethionine synthetase  
gi|148662971 MRA\_3149 cysA3; thiosulfate sulfurtransferase CysA3  
gi|148663111 MRA\_3289 sahH; S-adenosyl-L-homocysteine hydrolase

**mra00900 Terpenoid backbone biosynthesis - Mycobacterium tuberculosis H37Ra (4)**

gi|148660331 MRA\_0569 grcC1; polyprenyl-diphosphate synthase GrcC1  
gi|148660636 MRA\_0867 fadA; acetyl-CoA acetyltransferase  
gi|148661112 MRA\_1331 fadA4; acetyl-CoA acetyltransferase  
gi|148663419 MRA\_3595 fadA6; acetyl-CoA acetyltransferase

**mra00250 Alanine, aspartate and glutamate metabolism - Mycobacterium tuberculosis H37Ra (4)**

gi|148661454 MRA\_1669 argG; argininosuccinate synthase  
gi|148661529 MRA\_1741 gabD2; succinic semialdehyde dehydrogenase  
gi|148662038 MRA\_2237 glnA1; glutamine synthetase

gi|148662311 MRA\_2501 gdh; NAD-dependent glutamate dehydrogenase Gdh

**mra00030 Pentose phosphate pathway - Mycobacterium tuberculosis H37Ra (4)**

gi|148660129 MRA\_0372 fba; fructose-bisphosphate aldolase  
gi|148660799 MRA\_1025 prsA; ribose-phosphate pyrophosphokinase  
gi|148660908 MRA\_1131 gnd2; 6-phosphogluconate dehydrogenase  
gi|148661240 MRA\_1457 tal; transaldolase

**mra00930 Caprolactam degradation - Mycobacterium tuberculosis H37Ra (2)**

gi|148660637 MRA\_0868 fadB; fatty oxidation complex subunit alpha  
gi|148663642 MRA\_3814 echA21; enoyl-CoA hydratase

**mra05152 Tuberculosis - Mycobacterium tuberculosis H37Ra (3)**

gi|148660116 MRA\_0359 dnaK; molecular chaperone DnaK  
gi|148660205 MRA\_0445 groEL; molecular chaperone GroEL  
gi|148663281 MRA\_3457 groEL; molecular chaperone GroEL

**mra03020 RNA polymerase - Mycobacterium tuberculosis H37Ra (3)**

gi|148660441 MRA\_0676 rpoB; DNA-directed RNA polymerase subunit beta  
gi|148660442 MRA\_0677 rpoC; DNA-directed RNA polymerase subunit beta'  
gi|148663322 MRA\_3498 rpoA; DNA-directed RNA polymerase subunit alpha

**mra01040 Biosynthesis of unsaturated fatty acids - Mycobacterium tuberculosis H37Ra (3)**

gi|148660007 MRA\_0251 fabG; 3-ketoacyl-ACP reductase  
gi|148660602 MRA\_0834 desA1; fatty acid desaturase  
gi|148660637 MRA\_0868 fadB; fatty oxidation complex subunit alpha

**mra00330 Arginine and proline metabolism - Mycobacterium tuberculosis H37Ra (3)**

gi|148661454 MRA\_1669 argG; argininosuccinate synthase  
gi|148662038 MRA\_2237 glnA1; glutamine synthetase  
gi|148662311 MRA\_2501 gdh; NAD-dependent glutamate dehydrogenase Gdh

**mra00970 Aminoacyl-tRNA biosynthesis - Mycobacterium tuberculosis H37Ra (3)**

gi|148661080 MRA\_1300 argS; arginyl-tRNA synthetase  
gi|148662842 MRA\_3021 gltX; glutamyl-tRNA synthetase  
gi|148663444 MRA\_3619 cysS; cysteinyl-tRNA synthetase

**mra00072 Synthesis and degradation of ketone bodies - Mycobacterium tuberculosis H37Ra (3)**

gi|148660636 MRA\_0867 fadA; acetyl-CoA acetyltransferase  
gi|148661112 MRA\_1331 fadA4; acetyl-CoA acetyltransferase  
gi|148663419 MRA\_3595 fadA6; acetyl-CoA acetyltransferase

**mra00480 Glutathione metabolism - Mycobacterium tuberculosis H37Ra (2)**

gi|148659826 MRA\_0068 icd2; isocitrate dehydrogenase (NADP) Icd2  
gi|148660908 MRA\_1131 gnd2; 6-phosphogluconate dehydrogenase

**mra00750 Vitamin B6 metabolism - Mycobacterium tuberculosis H37Ra (2)**

gi|148660661 MRA\_0891 serC; phosphoserine aminotransferase  
gi|148662446 MRA\_2634 pyridoxal biosynthesis lyase PdxS

**mra00660 C5-Branched dibasic acid metabolism - Mycobacterium tuberculosis H37Ra (2)**

gi|148660730 MRA\_0958 sucC; succinyl-CoA synthetase subunit beta  
gi|148660731 MRA\_0959 sucD; succinyl-CoA synthetase subunit alpha

**mra00061 Fatty acid biosynthesis - Mycobacterium tuberculosis H37Ra (2)**

gi|148660007 MRA\_0251 fabG; 3-ketoacyl-ACP reductase  
gi|148660602 MRA\_0834 desA1; fatty acid desaturase

**mra00350 Tyrosine metabolism - Mycobacterium tuberculosis H37Ra (2)**

gi|148661529 MRA\_1741 gabD2; succinic semialdehyde dehydrogenase  
gi|148662940 MRA\_3118 adhD; zinc-type alcohol dehydrogenase AdhD

**mra00670 One carbon pool by folate - Mycobacterium tuberculosis H37Ra (2)**

gi|148660879 MRA\_1104 glyA; serine hydroxymethyltransferase

gi|148662028 MRA\_2227 gcvT; glycine cleavage system aminomethyltransferase T

**mra04122 Sulfur relay system - Mycobacterium tuberculosis H37Ra (2)**

gi|148660593 MRA\_0825 cysA2; thiosulfate sulfurtransferase CysA2

gi|148662971 MRA\_3149 cysA3; thiosulfate sulfurtransferase CysA3

**mra00300 Lysine biosynthesis - Mycobacterium tuberculosis H37Ra (2)**

gi|148660988 MRA\_1210 tetrahydrodipicolinate N-succinyltransferase

gi|148661974 MRA\_2173 murE; UDP-N-acetylmuramoylalanyl-D-glutamate--2,6-diaminopimelate ligase

**mra00360 Phenylalanine metabolism - Mycobacterium tuberculosis H37Ra (1)**

gi|148663642 MRA\_3814 echA21; enoyl-CoA hydratase

**mra00627 Aminobenzoate degradation - Mycobacterium tuberculosis H37Ra (1)**

gi|148663642 MRA\_3814 echA21; enoyl-CoA hydratase

**mra03430 Mismatch repair - Mycobacterium tuberculosis H37Ra (1)**

gi|148659759 MRA\_0002 dnaN; DNA polymerase III subunit beta

**mra00460 Cyanoamino acid metabolism - Mycobacterium tuberculosis H37Ra (1)**

gi|148660879 MRA\_1104 glyA; serine hydroxymethyltransferase

**mra00626 Naphthalene degradation - Mycobacterium tuberculosis H37Ra (1)**

gi|148662940 MRA\_3118 adhD; zinc-type alcohol dehydrogenase AdhD

**mra00760 Nicotinate and nicotinamide metabolism - Mycobacterium tuberculosis H37Ra (1)**

gi|148659921 MRA\_0165 pntB; NAD(P) transhydrogenase subunit beta

**mra00860 Porphyrin and chlorophyll metabolism - Mycobacterium tuberculosis H37Ra (1)**

gi|148662842 MRA\_3021 gltX; glutamyl-tRNA synthetase

**mra00623 Toluene degradation - Mycobacterium tuberculosis H37Ra (1)**

gi|148660013 MRA\_0257 sdhA; succinate dehydrogenase flavoprotein subunit

**mra00051 Fructose and mannose metabolism - Mycobacterium tuberculosis H37Ra (1)**

gi|148660129 MRA\_0372 fba; fructose-bisphosphate aldolase

**mra01053 Biosynthesis of siderophore group nonribosomal peptides - Mycobacterium tuberculosis H37Ra (1)**

gi|148663076 MRA\_3254 entC; isochorismate synthase EntC

**mra00625 Chloroalkane and chloroalkene degradation - Mycobacterium tuberculosis H37Ra (1)**

gi|148662940 MRA\_3118 adhD; zinc-type alcohol dehydrogenase AdhD

**mra00984 Steroid degradation - Mycobacterium tuberculosis H37Ra (1)**

gi|148663433 MRA\_3608 bphD; 2-hydroxy-6-phenylhexa-2,4-dienoic acid hydrolase

**mra00130 Ubiquinone and other terpenoid-quinone biosynthesis - Mycobacterium tuberculosis H37Ra (1)**

gi|148663076 MRA\_3254 entC; isochorismate synthase EntC

**mra00780 Biotin metabolism - Mycobacterium tuberculosis H37Ra (1)**

gi|148660007 MRA\_0251 fabG; 3-ketoacyl-ACP reductase

**mra03030 DNA replication - Mycobacterium tuberculosis H37Ra (1)**

gi|148659759 MRA\_0002 dnaN; DNA polymerase III subunit beta

**mra00550 Peptidoglycan biosynthesis - Mycobacterium tuberculosis H37Ra (1)**

gi|148661974 MRA\_2173 murE; UDP-N-acetylmuramoylalanyl-D-glutamate--2,6-diaminopimelate ligase

**mra03440 Homologous recombination - Mycobacterium tuberculosis H37Ra (1)**

gi|148659759 MRA\_0002 dnaN; DNA polymerase III subunit beta

**mra00770 Pantothenate and CoA biosynthesis - Mycobacterium tuberculosis H37Ra (1)**

gi|148662852 MRA\_3031 ilvC; ketol-acid reductoisomerase

**mra00562 Inositol phosphate metabolism - Mycobacterium tuberculosis H37Ra (1)**

gi|148660529 MRA\_0762 mmsA; MmsA

**mra00290 Valine, leucine and isoleucine biosynthesis - Mycobacterium tuberculosis H37Ra (1)**

gi|148662852 MRA\_3031 ilvC; ketol-acid reductoisomerase

**mra00430 Taurine and hypotaurine metabolism - Mycobacterium tuberculosis H37Ra (1)**

gi|148662311 MRA\_2501 gdh; NAD-dependent glutamate dehydrogenase Gdh
