# Supplementary material
Source: PubMed Central journal article supplement (PMC4256489)
Supplement: supp_M114.041962_mcp.M114.041962-8.pdf [file supp_M114.041962_mcp.M114.041962-8.pdf]

**Supplementary Table S6. Comparison of Mycobacterium tuberculosis H37Ra acetylome with other bacterial acetylomes.**

**BLAST alignments were performed by using BlastP software with BLOSUM62 matrix; the best-scoring homologous protein was selected if the corresponding BLAST E values were lower than 1E-5.**

| <b>Mycobacterium tuberculosis H37Ra</b> |                                                                     | <b>Salmonella typhimurium</b> | <b>Escherichia coli</b> | <b>Erwinia amylovora</b> | <b>Bacillus subtilis</b> |
|-----------------------------------------|---------------------------------------------------------------------|-------------------------------|-------------------------|--------------------------|--------------------------|
| <b>Protein ID</b>                       | <b>Description</b>                                                  |                               |                         |                          |                          |
| qi 148659912                            | short-chain type dehydrogenase/reductase                            |                               | qi 26109978             | qi 292898248             | BSU15910                 |
| qi 148660007                            | 3-ketoacyl-ACP reductase                                            |                               | qi 26109978             | qi 292898248             | BSU15910                 |
| qi 148660104                            | putative iron-sulfur-binding reductase                              |                               |                         | qi 292899402             |                          |
| qi 148660013                            | succinate dehydrogenase flavoprotein subunit                        |                               | qi 26246691             |                          | BSU28440                 |
| qi 148660035                            | acyl-CoA synthetase                                                 | sp Q8ZKF6 ACSA_SALTY          |                         |                          | BSU28560                 |
| qi 148660116                            | molecular chaperone DnaK                                            | sp POA9X6 MREB_SALTY          | qi 75235743             |                          | BSU25470                 |
| qi 148660129                            | fructose-bisphosphate aldolase                                      |                               | qi 110643069            | qi 292900509             | BSU37120                 |
| qi 148660204                            | short chain dehydrogenase                                           |                               | qi 26109978             |                          | BSU15910                 |
| qi 148660205                            | molecular chaperone GroEL                                           |                               | qi 99867128             | qi 292898143             | BSU06030                 |
| qi 148660228                            | dihydrolypoamide dehydrogenase                                      |                               | qi 26106453             |                          | BSU14610                 |
| qi 148660233                            | isocitrate lyase Icl                                                | sp P51066 ACEA_SALTY          |                         |                          |                          |
| qi 148660256                            | phosphoglyceromutase                                                | sp Q8ZJU8 GPMB_SALTY          | qi 13360242             | qi 292898912             |                          |
| qi 148660426                            | 50S ribosomal protein L7/L12                                        |                               |                         | qi 292897959             | BSU01050                 |
| qi 148660320                            | acyl-CoA synthetase                                                 | sp Q8ZKF6 ACSA_SALTY          |                         |                          | BSU28560                 |
| qi 148660441                            | DNA-directed RNA polymerase subunit beta                            |                               | qi 42818                | qi 292897960             | BSU01070                 |
| qi 148660442                            | DNA-directed RNA polymerase subunit beta'                           |                               | qi 223476               |                          | BSU01080                 |
| qi 148660459                            | elongation factor G                                                 | sp POA1H3 EFG_SALTY           | qi 110643581            | qi 292900894             | BSU01120                 |
| qi 148660460                            | elongation factor Tu                                                | sp POA1W4 LEPA_SALTY          | qi 26249935             | qi 292900048             | BSU01130                 |
| qi 148660475                            | 30S ribosomal protein S10                                           |                               |                         | qi 292900892             |                          |
| qi 148660529                            | MmsA                                                                |                               | qi 75515146             |                          | BSU39760                 |
| qi 148660637                            | fatty oxidation complex subunit alpha                               | sp Q8ZNA7 FADJ_SALTY          |                         |                          |                          |
| qi 148660667                            | citrate synthase 2                                                  | sp O68883 CISY_SALTY          | qi 16128695             |                          | BSU29140                 |
| qi 148660674                            | type II citrate synthase                                            | sp O68883 CISY_SALTY          | qi 16128695             |                          | BSU29140                 |
| qi 148660730                            | succinyl-CoA synthetase subunit beta                                | sp P66869 SUCC_SALTY          |                         |                          | BSU16090                 |
| qi 148660799                            | ribose-phosphate pyrophosphokinase                                  | sp POA1V6 KPRS_SALTY          |                         |                          |                          |
| qi 148660879                            | serine hydroxymethyl transferase                                    |                               | qi 26248915             | qi 292900198             | BSU36900                 |
| qi 148660884                            | fumarate hydratase                                                  | sp Q8ZPL7 FUMC_SALTY          |                         |                          | BSU06440                 |
| qi 148661027                            | malate dehydrogenase                                                | sp P25077 MDH_SALTY           |                         |                          |                          |
| qi 148661035                            | alpha-ketoglutarate decarboxylase                                   | tr Q8ZRT1 Q8ZRT1_SALTY        | qi 26246694             | qi 292898469             | BSU19370                 |
| qi 148661113                            | thioredoxin-related protein                                         |                               | qi 148071               | qi 292897894             |                          |
| qi 148661183                            | S-adenosylmethionine synthetase                                     |                               | qi 146851               |                          | BSU30550                 |
| qi 148661240                            | transaldolase                                                       | sp Q8ZN83 TALA_SALTY          |                         | qi 292898367             | BSU37110                 |
| qi 148661276                            | 3-oxoacyl-ACP reductase                                             |                               | qi 26109978             | qi 292898248             | BSU15910                 |
| qi 148661325                            | acyl-CoA synthetase                                                 | sp Q8ZKF6 ACSA_SALTY          |                         |                          | BSU28560                 |
| qi 148661329                            | hypothetical protein                                                |                               | qi 146275               |                          |                          |
| qi 148661425                            | 30S ribosomal protein S1                                            |                               | qi 42900                | qi 292899057             | BSU22880                 |
| qi 148661529                            | succinic semialdehyde dehydrogenase                                 |                               | qi 75515146             |                          | BSU03910                 |
| qi 148661643                            | malate synthase G                                                   | tr Q8ZKL4 Q8ZKL4_SALTY        |                         |                          |                          |
| qi 148661816                            | 20-beta-hydroxysteroid dehydrogenase FabG3                          |                               | qi 26109978             | qi 292898248             | BSU15910                 |
| qi 148661974                            | UDP-N-acetylmuramoylalanine-D-glutamate--2,6-diaminopimelate ligase | sp Q8ZRU7 MURE_SALTY          |                         |                          |                          |
| qi 148662003                            | long-chain-fatty-acid--CoA ligase                                   | sp Q8ZKF6 ACSA_SALTY          |                         |                          | BSU28560                 |
| qi 148662032                            | dihydrolypoamide acetyltransferase                                  | tr Q8ZRT1 Q8ZRT1_SALTY        | qi 26246694             | qi 292898469             | BSU19360                 |
| qi 148662065                            | acyl carrier protein                                                |                               |                         | qi 292899175             |                          |
| qi 148662038                            | glutamine synthetase                                                | sp POA1P6 GLNA_SALTY          |                         |                          | BSU17460                 |
| qi 148662062                            | pyruvate dehydrogenase subunit E1                                   |                               | qi 83584560             |                          |                          |
| qi 148662625                            | polynucleotide phosphorylase                                        |                               | qi 42900                | qi 292899057             | BSU22880                 |
| qi 148662733                            | elongation factor Ts                                                |                               |                         | qi 292898540             | BSU16500                 |
| qi 148662734                            | 30S ribosomal protein S2                                            |                               |                         | qi 292898539             | BSU16490                 |
| qi 148662940                            | zinc-type alcohol dehydrogenase AdhD                                |                               |                         | qi 292898783             | BSU26970                 |
| qi 148662726                            | ribosome recycling factor                                           | sp P66738 RRF_SALTY           | qi 67472290             |                          | BSU16520                 |

|              |                                                                            |                      |             |              |          |
|--------------|----------------------------------------------------------------------------|----------------------|-------------|--------------|----------|
| qi 148662987 | two component transcriptional regulatory protein DevR                      | sp P27667 UHPA_SALTY |             | qi 292900804 | BSU28560 |
| qi 148663086 | short chain dehydrogenase                                                  |                      | qi 26109978 |              | BSU15910 |
| qi 148663109 | two component sensory transduction transcriptional regulatory protein MtrA | sp P66795 QSEB_SALTY |             | qi 292900804 | BSU23120 |
| qi 148663251 | hypothetical protein MRA_3428A                                             |                      |             | qi 292899402 |          |
| qi 148663281 | molecular chaperone GroEL                                                  |                      | qi 99867128 | qi 292898143 | BSU06030 |
| qi 148663282 | co-chaperonin GroES                                                        |                      |             | qi 292898142 | BSU06020 |
| qi 148663444 | cysteinyI-tRNA synthetase                                                  | sp Q8ZR68 SYC_SALTY  |             |              |          |
| qi 148663491 | inorganic pyrophosphatase                                                  | sp P65748 IPYR_SALTY |             | qi 292898185 |          |
| qi 148663642 | enoyl-CoA hydratase                                                        | sp Q8ZNA7 FADJ_SALTY |             | qi 292900048 |          |
| qi 148663668 | polyketide synthase Pks13                                                  |                      |             | qi 292900669 | BSU03510 |
| qi 148660731 | succinyl-CoA synthetase subunit alpha                                      |                      |             |              | BSU16100 |
| qi 148660908 | 6-phosphogluconate dehydrogenase                                           |                      |             |              | BSU23860 |
| qi 148661096 | ATP synthase FOF1 subunit alpha                                            |                      |             |              | BSU36810 |
| qi 148661098 | ATP synthase FOF1 subunit beta                                             |                      |             |              | BSU36810 |
| qi 148661268 | aconitate hydratase                                                        |                      |             |              | BSU18000 |
| qi 148661317 | acyl-CoA synthetase                                                        |                      |             |              | BSU28560 |
| qi 148661431 | hypothetical protein                                                       |                      |             |              | BSU39250 |
| qi 148661454 | argininosuccinate synthase                                                 |                      |             |              | BSU29450 |
| qi 148663669 | long-chain-fatty-acid--CoA ligase                                          |                      |             |              | BSU28560 |
| qi 148663323 | 30S ribosomal protein S4                                                   |                      |             |              | BSU29660 |
| qi 148663322 | DNA-directed RNA polymerase subunit alpha                                  |                      |             |              | BSU01430 |
| qi 148661733 | fatty-acid--CoA ligase                                                     |                      |             |              | BSU28560 |
| qi 148662028 | glycine cleavage system aminomethyltransferase T                           |                      |             |              | BSU24570 |
| qi 148662295 | ATP-dependent Clp protease proteolytic subunit                             |                      |             |              | BSU34540 |
| qi 148662446 | pyridoxal biosynthesis lyase PdxS                                          |                      |             |              | BSU00110 |
| qi 148662852 | ketol-acid reductoisomerase                                                |                      |             |              | BSU28290 |
