# Supplementary material
Source: PubMed Central journal article supplement (PMC4256489)
Supplement: supp_M114.041962_mcp.M114.041962-9.pdf [file supp_M114.041962_mcp.M114.041962-9.pdf]

**Supplementary Table S7. List of acetylated proteins and their interacting proteins.**

| Node1  | Interaction type | Node2   |
|--------|------------------|---------|
| acr    | pp               | clpX    |
| acr    | pp               | clpP2   |
| acr    | pp               | Rv3417c |
| acr    | pp               | groS    |
| acr    | pp               | devR    |
| acr    | pp               | nuoH    |
| acr    | pp               | MT3777  |
| fadA4  | pp               | fabG    |
| fadA4  | pp               | fadE25  |
| fadA4  | pp               | fadA6   |
| fadA4  | pp               | ndhC    |
| fadA4  | pp               | Rv1324  |
| fadA4  | pp               | fadE23  |
| fadA4  | pp               | argF    |
| fadA4  | pp               | glcE    |
| fadA4  | pp               | ndhB    |
| fadA4  | pp               | etfA    |
| fadA4  | pp               | dlhT    |
| fadA4  | pp               | tpaA    |
| fadA4  | pp               | etfB    |
| MT1976 | pp               | pks13   |
| frr    | pp               | nuoC    |
| frr    | pp               | cysS    |
| frr    | pp               | ilvC    |
| frr    | pp               | nuoL    |
| frr    | pp               | glhX    |
| frr    | pp               | rpsI    |
| frr    | pp               | nuoD    |
| frr    | pp               | nuoN    |
| frr    | pp               | nuoH    |
| frr    | pp               | nuoA    |
| frr    | pp               | rpsM    |
| frr    | pp               | nuoK    |
| frr    | pp               | rpsK    |
| frr    | pp               | rpsD    |
| frr    | pp               | nuoM    |
| frr    | pp               | rpsB    |
| frr    | pp               | rpsP    |
| frr    | pp               | groS    |
| frr    | pp               | nuoB    |
| frr    | pp               | tsf     |
| frr    | pp               | Rv3417c |
| frr    | pp               | rpoA    |
| frr    | pp               | rplQ    |
| frr    | pp               | ppa     |
| frr    | pp               | ilvB    |
| frr    | pp               | nuoI    |
| argH   | pp               | etfB    |
| argH   | pp               | rpsD    |
| argH   | pp               | groS    |
| argH   | pp               | clpX    |
| argH   | pp               | ilvH    |
| argH   | pp               | pvrG    |
| argH   | pp               | glnA1   |
| argH   | pp               | rpoA    |
| argH   | pp               | ilvC    |
| argH   | pp               | ahcY    |
| argH   | pp               | ilvB    |
| argH   | pp               | etfA    |
| argH   | pp               | gevP    |
| argH   | pp               | cysS    |
| argH   | pp               | ppa     |
| argH   | pp               | nuoN    |
| serC   | pp               | prs     |
| serC   | pp               | glvA1   |
| serC   | pp               | rpsA    |
| serC   | pp               | citA    |
| argF   | pp               | ahcY    |
| argF   | pp               | argH    |
| argF   | pp               | pvrG    |
| argF   | pp               | etfA    |
| argF   | pp               | scpM    |
| argF   | pp               | rplQ    |
| argF   | pp               | etfB    |
| argF   | pp               | clpP2   |
| argF   | pp               | ilvB    |
| argF   | pp               | gpsI    |
| argF   | pp               | ilvH    |
| argF   | pp               | nuoH    |
| argF   | pp               | argG    |
| argF   | pp               | glhX    |
| argF   | pp               | gevT    |
| argF   | pp               | frr     |
| argF   | pp               | rpsB    |
| argF   | pp               | Rv3417c |
| argF   | pp               | cysS    |

|        |    |         |
|--------|----|---------|
| argF   | pp | nuoI    |
| argF   | pp | ilvC    |
| argF   | pp | tsf     |
| argF   | pp | rpsD    |
| argF   | pp | clpX    |
| argF   | pp | MT3777  |
| argF   | pp | rpsI    |
| argF   | pp | gevP    |
| argF   | pp | aceE    |
| argF   | pp | glnA1   |
| argF   | pp | ppa     |
| argG   | pp | ppa     |
| argG   | pp | gevP    |
| argG   | pp | ilvC    |
| argG   | pp | ilvB    |
| argG   | pp | dlaT    |
| argG   | pp | glnA1   |
| argG   | pp | groS    |
| argG   | pp | cfpI7   |
| argG   | pp | mpo     |
| argG   | pp | rpsD    |
| argG   | pp | argH    |
| argG   | pp | pvrG    |
| argG   | pp | clpX    |
| argG   | pp | etfB    |
| argG   | pp | pdhB    |
| argG   | pp | acpM    |
| argG   | pp | ilvH    |
| argG   | pp | aceE    |
| argG   | pp | gevT    |
| argG   | pp | Rv3417c |
| argG   | pp | gdh     |
| argG   | pp | clpP2   |
| argG   | pp | rpoA    |
| argG   | pp | spsl    |
| fadE25 | pp | echA21  |
| fadE25 | pp | fadA6   |
| MT0852 | pp | cfpI7   |
| fadE23 | pp | fadA6   |
| fadE23 | pp | echA21  |
| argJ   | pp | rpsI    |
| argJ   | pp | glnA1   |
| argJ   | pp | argF    |
| argJ   | pp | rpmB3   |
| argJ   | pp | gdh     |
| argJ   | pp | mpo     |
| argJ   | pp | argH    |
| argJ   | pp | ilvC    |
| argJ   | pp | argG    |
| argJ   | pp | ilvH    |
| argJ   | pp | ilvB    |
| fadD25 | pp | pls13   |
| prs    | pp | shX     |
| prs    | pp | argS    |
| prs    | pp | argF    |
| prs    | pp | mdh     |
| prs    | pp | nuoC    |
| prs    | pp | rpsI    |
| prs    | pp | pdhB    |
| prs    | pp | clpP2   |
| prs    | pp | shcY    |
| prs    | pp | metK    |
| prs    | pp | glyA1   |
| prs    | pp | acpM    |
| prs    | pp | fumC    |
| prs    | pp | rpsB    |
| prs    | pp | dlaT    |
| prs    | pp | sal     |
| prs    | pp | argH    |
| prs    | pp | mpo     |
| prs    | pp | tpiA    |
| prs    | pp | pvrG    |
| prs    | pp | ilvC    |
| prs    | pp | atpD    |
| prs    | pp | cysS    |
| prs    | pp | ppa     |
| prs    | pp | Rv3417c |
| prs    | pp | nuoH    |
| prs    | pp | atpB    |
| prs    | pp | rpsA    |
| prs    | pp | rpsF    |
| prs    | pp | tsf     |
| prs    | pp | rpsM    |
| prs    | pp | atpA    |
| prs    | pp | rpoA    |
| prs    | pp | rpsD    |
| prs    | pp | rpsK    |
| prs    | pp | ifr     |
| prs    | pp | atpG    |

|        |    |         |
|--------|----|---------|
| pis    | pp | ilvB    |
| pis    | pp | gpsI    |
| fadD24 | pp | pks13   |
| gppE   | pp | acr     |
| gppE   | pp | rpIK    |
| gppE   | pp | fusA    |
| gppE   | pp | Rv3417c |
| gppE   | pp | rpoB    |
| gppE   | pp | rpIA    |
| gppE   | pp | rpIJ    |
| gppE   | pp | rpsG    |
| gppE   | pp | tsf     |
| gppE   | pp | rpsL    |
| gppE   | pp | rpsK    |
| gppE   | pp | tpiA    |
| gppE   | pp | rpoA    |
| gppE   | pp | metK    |
| gppE   | pp | rpIC    |
| gppE   | pp | clpP2   |
| gppE   | pp | dnaJ1   |
| gppE   | pp | glnA1   |
| gppE   | pp | TB15.3  |
| gppE   | pp | gltA2   |
| gppE   | pp | fir     |
| gppE   | pp | rpsE    |
| gppE   | pp | ilvB    |
| gppE   | pp | rpIQ    |
| gppE   | pp | rpLL    |
| gppE   | pp | rpLE    |
| gppE   | pp | pvrG    |
| gppE   | pp | gltX    |
| gppE   | pp | rpsH    |
| gppE   | pp | tuf     |
| gppE   | pp | rpoC    |
| gppE   | pp | glyA1   |
| gppE   | pp | rpsJ    |
| gppE   | pp | groS    |
| gppE   | pp | rpsM    |
| gppE   | pp | murG    |
| gppE   | pp | rpsI    |
| gppE   | pp | ilvC    |
| gppE   | pp | clpX    |
| gppE   | pp | gpsI    |
| gppE   | pp | hsp65   |
| gppE   | pp | atpD    |
| acn    | pp | pdhB    |
| acn    | pp | ahcY    |
| acn    | pp | aceE    |
| acn    | pp | dlaT    |
| acn    | pp | etfA    |
| acn    | pp | nuoB    |
| acn    | pp | nuoA    |
| acn    | pp | gevP    |
| acn    | pp | pdhC    |
| acn    | pp | ilvC    |
| acn    | pp | etfB    |
| acn    | pp | gevT    |
| acn    | pp | argH    |
| acn    | pp | groS    |
| acn    | pp | argG    |
| acn    | pp | Rv3417c |
| acn    | pp | glnA1   |
| acn    | pp | gpsI    |
| argS   | pp | fir     |
| argS   | pp | rpoA    |
| argS   | pp | atpC    |
| argS   | pp | rpsI    |
| argS   | pp | atpA    |
| argS   | pp | rpsA    |
| argS   | pp | rpsD    |
| argS   | pp | atpG    |
| argS   | pp | atpD    |
| argS   | pp | atpB    |
| argS   | pp | nuoI    |
| argS   | pp | rpsP    |
| argS   | pp | argF    |
| argS   | pp | argI    |
| argS   | pp | pvrG    |
| argS   | pp | gevP    |
| argS   | pp | pwa     |
| argS   | pp | ilvB    |
| argS   | pp | ilvC    |
| argS   | pp | metK    |
| argS   | pp | Rv3417c |
| argS   | pp | gltX    |
| argS   | pp | tsf     |
| argS   | pp | rpsB    |
| argS   | pp | gpsI    |
| argS   | pp | cysS    |

|      |    |         |
|------|----|---------|
| argS | pp | rplQ    |
| argS | pp | rpsK    |
| argS | pp | argG    |
| argS | pp | rpsM    |
| argS | pp | MT3777  |
| fumC | pp | pdbB    |
| fumC | pp | acn     |
| fumC | pp | argF    |
| fumC | pp | gevP    |
| fumC | pp | glnA1   |
| fumC | pp | tal     |
| fumC | pp | argG    |
| fumC | pp | atpA    |
| fumC | pp | fadA4   |
| fumC | pp | nuoI    |
| fumC | pp | etfA    |
| fumC | pp | rpoA    |
| fumC | pp | rpsB    |
| fumC | pp | ahcY    |
| fumC | pp | gpsI    |
| fumC | pp | nuoC    |
| fumC | pp | acpM    |
| fumC | pp | pdcC    |
| fumC | pp | gltX    |
| fumC | pp | nuoD    |
| fumC | pp | ilvB    |
| fumC | pp | pyrG    |
| fumC | pp | atpG    |
| fumC | pp | argH    |
| fumC | pp | ilvC    |
| fumC | pp | tpiA    |
| fumC | pp | groS    |
| fumC | pp | tsf     |
| fumC | pp | gevH    |
| fumC | pp | gabD2   |
| fumC | pp | aceE    |
| fumC | pp | rpsK    |
| fumC | pp | argS    |
| fumC | pp | dlaT    |
| fumC | pp | atpD    |
| fumC | pp | rpsA    |
| fumC | pp | ppa     |
| fumC | pp | kgd     |
| fumC | pp | Rv3417c |
| fumC | pp | mdh     |
| gdh  | pp | gltX    |
| rpsE | pp | Rv3417c |
| rpsE | pp | tpiA    |
| rpsE | pp | metK    |
| rpsE | pp | rpoA    |
| rpsE | pp | gltA2   |
| rpsE | pp | rpsA    |
| rpsE | pp | cysS    |
| rpsE | pp | rpsP    |
| rpsE | pp | atpA    |
| rpsE | pp | ahcY    |
| rpsE | pp | pdbB    |
| rpsE | pp | nuoH    |
| rpsE | pp | glyA1   |
| rpsE | pp | rpsD    |
| rpsE | pp | atpF    |
| rpsE | pp | rpsK    |
| rpsE | pp | tsf     |
| rpsE | pp | rplQ    |
| rpsE | pp | fir     |
| rpsE | pp | argF    |
| rpsE | pp | ilvB    |
| rpsE | pp | glnA1   |
| rpsE | pp | gltX    |
| rpsE | pp | nuoD    |
| rpsE | pp | pdcC    |
| rpsE | pp | ppa     |
| rpsE | pp | ilvC    |
| rpsE | pp | argS    |
| rpsE | pp | nuoL    |
| rpsE | pp | pyrG    |
| rpsE | pp | rps     |
| rpsE | pp | groS    |
| rpsE | pp | rpsM    |
| rpsE | pp | sucD    |
| rpsE | pp | sucC    |
| rpsE | pp | rpsB    |
| rpsE | pp | atpB    |
| rpsE | pp | gpsI    |
| rpsE | pp | atpD    |
| rpsE | pp | rpsB    |
| rpsE | pp | atpG    |
| rpsH | pp | atpG    |
| rpsH | pp | gpsI    |

|      |    |         |
|------|----|---------|
| rpsH | pp | argS    |
| rpsH | pp | gltA2   |
| rpsH | pp | pyrG    |
| rpsH | pp | atpD    |
| rpsH | pp | rpsI    |
| rpsH | pp | atpA    |
| rpsH | pp | atpF    |
| rpsH | pp | ppa     |
| rpsH | pp | rpoA    |
| rpsH | pp | rpsE    |
| rpsH | pp | rpsM    |
| rpsH | pp | cvysS   |
| rpsH | pp | rpsB    |
| rpsH | pp | rpsK    |
| rpsH | pp | Rv3417c |
| rpsH | pp | rplQ    |
| rpsH | pp | tsf     |
| rpsH | pp | fir     |
| rpsH | pp | aceE    |
| rpsH | pp | tpiA    |
| rpsH | pp | rpsP    |
| rpsH | pp | prs     |
| rpsH | pp | gltX    |
| rpsH | pp | rpsA    |
| rpsH | pp | atpC    |
| rpsH | pp | rpsD    |
| rpsH | pp | atpB    |
| rpsG | pp | rpsC    |
| rpsG | pp | rpsE    |
| rpsG | pp | tuf     |
| rpsG | pp | ahcY    |
| rpsG | pp | prs     |
| rpsG | pp | rpsS    |
| rpsG | pp | rpsA    |
| rpsG | pp | rplQ    |
| rpsG | pp | fumC    |
| rpsG | pp | gltA2   |
| rpsG | pp | tpiA    |
| rpsG | pp | atpF    |
| rpsG | pp | atpB    |
| rpsG | pp | rpsM    |
| rpsG | pp | atpG    |
| rpsG | pp | rpsB    |
| rpsG | pp | kad     |
| rpsG | pp | glvA1   |
| rpsG | pp | rpsH    |
| rpsG | pp | nuoC    |
| rpsG | pp | atpD    |
| rpsG | pp | fir     |
| rpsG | pp | ppa     |
| rpsG | pp | gltX    |
| rpsG | pp | rpsD    |
| rpsG | pp | rpsP    |
| rpsG | pp | rpsI    |
| rpsG | pp | argS    |
| rpsG | pp | cvysS   |
| rpsG | pp | metK    |
| rpsG | pp | flsA    |
| rpsG | pp | pyrG    |
| rpsG | pp | rpsI    |
| rpsG | pp | atpA    |
| rpsG | pp | Rv3417c |
| rpsG | pp | rpsI    |
| rpsG | pp | groS    |
| rpsG | pp | rplC    |
| rpsG | pp | nuoD    |
| rpsG | pp | nuoI    |
| rpsG | pp | atpC    |
| rpsG | pp | rplE    |
| rpsG | pp | lycC    |
| rpsG | pp | tsf     |
| rpsG | pp | clpX    |
| rpsG | pp | atfB    |
| rpsG | pp | rpsK    |
| rpsG | pp | rpoA    |
| rpsG | pp | rpsQ    |
| rpsG | pp | atfA    |
| clpX | pp | clpP2   |
| clpX | pp | gltX    |
| clpX | pp | rpsB    |
| clpX | pp | nuoI    |
| clpX | pp | rpoA    |
| clpX | pp | rplQ    |
| clpX | pp | Rv3417c |
| clpX | pp | rpsD    |
| clpX | pp | groS    |
| clpX | pp | rpsI    |
| rpsJ | pp | argH    |
| rpsJ | pp | glvA1   |

|        |    |         |
|--------|----|---------|
| rpsJ   | pp | atpA    |
| rpsJ   | pp | rplC    |
| rpsJ   | pp | cvyS    |
| rpsJ   | pp | gpsI    |
| rpsJ   | pp | nuoI    |
| rpsJ   | pp | ilvH    |
| rpsJ   | pp | rpsC    |
| rpsJ   | pp | rpsE    |
| rpsJ   | pp | aceE    |
| rpsJ   | pp | Rv3417c |
| rpsJ   | pp | prs     |
| rpsJ   | pp | ppa     |
| rpsJ   | pp | rpsK    |
| rpsJ   | pp | atpB    |
| rpsJ   | pp | rpsH    |
| rpsJ   | pp | fadB    |
| rpsJ   | pp | frt     |
| rpsJ   | pp | fumC    |
| rpsJ   | pp | rplE    |
| rpsJ   | pp | pvrG    |
| rpsJ   | pp | atpD    |
| rpsJ   | pp | rpsA    |
| rpsJ   | pp | argS    |
| rpsJ   | pp | ilvC    |
| rpsJ   | pp | rpoA    |
| rpsJ   | pp | atpF    |
| rpsJ   | pp | rpsP    |
| rpsJ   | pp | gevT    |
| rpsJ   | pp | rpsD    |
| rpsJ   | pp | rpsM    |
| rpsJ   | pp | rpsI    |
| rpsJ   | pp | altX    |
| rpsJ   | pp | rpsB    |
| rpsJ   | pp | rpsS    |
| rpsJ   | pp | rplQ    |
| rpsJ   | pp | ilvB    |
| rpsJ   | pp | rpsQ    |
| rpsJ   | pp | atpG    |
| rpsJ   | pp | tsf     |
| rpsJ   | pp | rplQ    |
| rpsJ   | pp | rpsM    |
| rpsJ   | pp | rpoA    |
| rpsJ   | pp | rpsD    |
| rpsJ   | pp | cvyS    |
| rpsJ   | pp | ppa     |
| rpsJ   | pp | rpsK    |
| fadD28 | pp | plk13   |
| rpsL   | pp | rpsQ    |
| rpsL   | pp | rpsH    |
| rpsL   | pp | atpA    |
| rpsL   | pp | MT3777  |
| rpsL   | pp | sucD    |
| rpsL   | pp | ilvB    |
| rpsL   | pp | rplE    |
| rpsL   | pp | argH    |
| rpsL   | pp | cvyS    |
| rpsL   | pp | clpX    |
| rpsL   | pp | mdh     |
| rpsL   | pp | nuoM    |
| rpsL   | pp | murG    |
| rpsL   | pp | rplQ    |
| rpsL   | pp | rpsI    |
| rpsL   | pp | fumC    |
| rpsL   | pp | rpsP    |
| rpsL   | pp | nuoI    |
| rpsL   | pp | atpF    |
| rpsL   | pp | rplC    |
| rpsL   | pp | rpsM    |
| rpsL   | pp | murE    |
| rpsL   | pp | atpB    |
| rpsL   | pp | nuoA    |
| rpsL   | pp | metK    |
| rpsL   | pp | glyA1   |
| rpsL   | pp | glcA2   |
| rpsL   | pp | nuoN    |
| rpsL   | pp | altX    |
| rpsL   | pp | groS    |
| rpsL   | pp | rpsK    |
| rpsL   | pp | nuoB    |
| rpsL   | pp | tsf     |
| rpsL   | pp | ppa     |
| rpsL   | pp | rpsI    |
| rpsL   | pp | gpsI    |
| rpsL   | pp | argS    |
| rpsL   | pp | rpsG    |
| rpsL   | pp | fusA    |
| rpsL   | pp | nuoD    |
| rpsL   | pp | argG    |
| rpsL   | pp | pvrG    |

|      |    |         |
|------|----|---------|
| rpsL | pp | rpsC    |
| rpsL | pp | scpM    |
| rpsL | pp | prs     |
| rpsL | pp | rpoA    |
| rpsL | pp | rpsB    |
| rpsL | pp | clpP2   |
| rpsL | pp | glnA1   |
| rpsL | pp | murD    |
| rpsL | pp | atpD    |
| rpsL | pp | atpG    |
| rpsL | pp | Rv3417c |
| rpsL | pp | gecT    |
| rpsL | pp | rpsS    |
| rpsL | pp | rpsD    |
| rpsL | pp | argF    |
| rpsL | pp | tuf     |
| rpsL | pp | ilvC    |
| rpsL | pp | rpsE    |
| rpsL | pp | rpsA    |
| rpsL | pp | fir     |
| rpsL | pp | ahcY    |
| rpsK | pp | ppa     |
| rpsK | pp | cysS    |
| rpsK | pp | rpsM    |
| rpsM | pp | ppa     |
| rpsM | pp | cysS    |
| rpsP | pp | rpsM    |
| rpsP | pp | ilvC    |
| rpsP | pp | rplQ    |
| rpsP | pp | altX    |
| rpsP | pp | nuoI    |
| rpsP | pp | rpsD    |
| rpsP | pp | rpoA    |
| rpsP | pp | rpmB3   |
| rpsP | pp | rpsI    |
| rpsP | pp | rpsK    |
| rpsP | pp | Rv3417c |
| rpsQ | pp | tsf     |
| rpsQ | pp | atpA    |
| rpsQ | pp | fir     |
| rpsQ | pp | nuoD    |
| rpsQ | pp | atpC    |
| rpsQ | pp | prs     |
| rpsQ | pp | groS    |
| rpsQ | pp | clpP2   |
| rpsQ | pp | rpoA    |
| rpsQ | pp | rpsK    |
| rpsQ | pp | glvA1   |
| rpsQ | pp | Rv3417c |
| rpsQ | pp | rpsA    |
| rpsQ | pp | rpsB    |
| rpsQ | pp | cysS    |
| rpsQ | pp | rpsE    |
| rpsQ | pp | rpsD    |
| rpsQ | pp | rpsH    |
| rpsQ | pp | atpD    |
| rpsQ | pp | rplE    |
| rpsQ | pp | atpB    |
| rpsQ | pp | rpsI    |
| rpsQ | pp | nuoH    |
| rpsQ | pp | sucC    |
| rpsQ | pp | argS    |
| rpsQ | pp | atpG    |
| rpsQ | pp | rplQ    |
| rpsQ | pp | rpsP    |
| rpsQ | pp | nuoL    |
| rpsQ | pp | rpmB3   |
| rpsQ | pp | sucD    |
| rpsQ | pp | atpI    |
| rpsQ | pp | rpsM    |
| rpsQ | pp | gplI    |
| rpsQ | pp | argS    |
| rpsQ | pp | ppa     |
| rpsQ | pp | argG    |
| rpsQ | pp | atpG    |
| rpsQ | pp | dnaK    |
| rpsQ | pp | Rv1488  |
| rpsQ | pp | gplI    |
| rpsQ | pp | rpsM    |
| rpsQ | pp | rpsO    |
| rpsQ | pp | atpG    |
| rpsQ | pp | atpB    |
| rpsQ | pp | gplI    |
| rpsQ | pp | rpsP    |
| rpsQ | pp | rpoA    |
| rpsQ | pp | fidB    |
| rpsQ | pp | atpF    |
| rpsQ | pp | atpA    |
| rpsQ | pp | ilvB    |

|        |    |         |
|--------|----|---------|
| rpsS   | pp | rpsE    |
| rpsS   | pp | rpsK    |
| rpsS   | pp | Rv3417c |
| rpsS   | pp | rplQ    |
| rpsS   | pp | pyrG    |
| rpsS   | pp | rpsA    |
| rpsS   | pp | rpsD    |
| rpsS   | pp | atpD    |
| rpsS   | pp | frt     |
| rpsS   | pp | rpsB    |
| rpsS   | pp | tsf     |
| rpsS   | pp | rplE    |
| rpsS   | pp | glyA1   |
| rpsS   | pp | cysS    |
| rpsS   | pp | gltX    |
| rpsS   | pp | rpsI    |
| rpsS   | pp | glnA1   |
| rpsS   | pp | argS    |
| rpsS   | pp | groS    |
| rpsS   | pp | prs     |
| rpsS   | pp | rpsH    |
| rpsS   | pp | rpsC    |
| rpsS   | pp | aceE    |
| iel    | pp | gltA2   |
| iel    | pp | atpD    |
| iel    | pp | murG    |
| iel    | pp | acn     |
| iel    | pp | fumC    |
| iel    | pp | ilvC    |
| iel    | pp | Rv3417c |
| iel    | pp | mraY    |
| iel    | pp | ilvB    |
| iel    | pp | aceE    |
| iel    | pp | glnA1   |
| iel    | pp | sucC    |
| iel    | pp | mmsA    |
| iel    | pp | glyA1   |
| iel    | pp | tpiA    |
| iel    | pp | glcB    |
| iel    | pp | mdh     |
| iel    | pp | gevT    |
| iel    | pp | gevP    |
| iel    | pp | kgd     |
| iel    | pp | groS    |
| iel    | pp | sucD    |
| iel    | pp | prs     |
| iel    | pp | rpsL    |
| iel    | pp | rpoA    |
| iel    | pp | rpoC    |
| Rv1324 | pp | groS    |
| sucC   | pp | dhfT    |
| sucC   | pp | atpD    |
| sucC   | pp | cysS    |
| sucC   | pp | nuoL    |
| sucC   | pp | atpF    |
| sucC   | pp | nuoD    |
| sucC   | pp | rpsB    |
| sucC   | pp | etfA    |
| sucC   | pp | metK    |
| sucC   | pp | fidA4   |
| sucC   | pp | clpX    |
| sucC   | pp | gevP    |
| sucC   | pp | nuoH    |
| sucC   | pp | fidA6   |
| sucC   | pp | aceE    |
| sucC   | pp | pdhB    |
| sucC   | pp | acpM    |
| sucC   | pp | rpsD    |
| sucC   | pp | rpoA    |
| sucC   | pp | atpA    |
| sucC   | pp | kgd     |
| sucC   | pp | gltX    |
| sucC   | pp | gevT    |
| sucC   | pp | groS    |
| sucC   | pp | gpiI    |
| sucC   | pp | frt     |
| sucC   | pp | argF    |
| sucC   | pp | glnA1   |
| sucC   | pp | Rv3417c |
| sucC   | pp | tpiA    |
| sucC   | pp | mdh     |
| sucC   | pp | sucD    |
| sucC   | pp | acn     |
| sucC   | pp | ppa     |
| sucC   | pp | ilvC    |
| sucC   | pp | nuoN    |
| sucC   | pp | ilvB    |
| sucC   | pp | nuoI    |
| sucC   | pp | rpsK    |



|      |    |         |
|------|----|---------|
| sucC | pp | fumC    |
| sucC | pp | tsf     |
| sucC | pp | pdhC    |
| sucC | pp | prs     |
| sucC | pp | mplQ    |
| sucC | pp | glyA1   |
| sucC | pp | etfB    |
| sucC | pp | clpP2   |
| sucC | pp | atpB    |
| sucC | pp | nuoA    |
| sucC | pp | rpsP    |
| sucC | pp | pvrG    |
| sucC | pp | atpG    |
| sucD | pp | glxX    |
| sucD | pp | glyA1   |
| sucD | pp | atpG    |
| sucD | pp | fumC    |
| sucD | pp | rpsD    |
| sucD | pp | glnA1   |
| sucD | pp | rpoA    |
| sucD | pp | etfB    |
| sucD | pp | clpP2   |
| sucD | pp | ppa     |
| sucD | pp | rpsB    |
| sucD | pp | murE    |
| sucD | pp | shcY    |
| sucD | pp | rpsA    |
| sucD | pp | Rv3417c |
| sucD | pp | gpsI    |
| sucD | pp | mdh     |
| sucD | pp | tpiA    |
| sucD | pp | acpM    |
| sucD | pp | groS    |
| sucD | pp | gevT    |
| sucD | pp | gevP    |
| sucD | pp | clpX    |
| sucD | pp | nuoL    |
| sucD | pp | atpC    |
| sucD | pp | tsf     |
| sucD | pp | gevH    |
| sucD | pp | nuoH    |
| sucD | pp | acn     |
| sucD | pp | nuoI    |
| sucD | pp | kgd     |
| sucD | pp | atpA    |
| sucD | pp | nuoM    |
| sucD | pp | mplQ    |
| sucD | pp | etfA    |
| sucD | pp | fir     |
| sucD | pp | rpsP    |
| sucD | pp | nuoA    |
| sucD | pp | atpF    |
| sucD | pp | pdhB    |
| sucD | pp | argF    |
| sucD | pp | atpD    |
| sucD | pp | prs     |
| sucD | pp | nuoB    |
| sucD | pp | dltT    |
| sucD | pp | nuoN    |
| sucD | pp | fidA6   |
| sucD | pp | fidA4   |
| sucD | pp | nuoC    |
| sucD | pp | ilvB    |
| sucD | pp | pdhC    |
| sucD | pp | nuoD    |
| sucD | pp | rpsK    |
| rpsA | pp | murG    |
| rpsA | pp | rpsI    |
| rpsA | pp | murF    |
| rpsA | pp | rpoA    |
| rpsA | pp | pdhB    |
| rpsA | pp | groS    |
| rpsA | pp | shcY    |
| rpsA | pp | glxX    |
| rpsA | pp | cysS    |
| rpsA | pp | ppa     |
| rpsA | pp | rpsK    |
| rpsA | pp | murD    |
| rpsA | pp | mplQ    |
| rpsA | pp | ilvC    |
| rpsA | pp | clpX    |
| rpsA | pp | tsf     |
| rpsA | pp | Rv3417c |
| rpsA | pp | clpP2   |
| rpsA | pp | fir     |
| rpsA | pp | acr     |
| rpsA | pp | gpsI    |
| rpsA | pp | acpM    |
| rpsA | pp | argG    |

|        |    |         |
|--------|----|---------|
| rpsA   | pp | rpsB    |
| rpsA   | pp | rpsD    |
| rpsA   | pp | gevT    |
| rpsA   | pp | rpsM    |
| rpsA   | pp | mraY    |
| bphC   | pp | bphD    |
| rpsB   | pp | nuoD    |
| rpsB   | pp | ilvC    |
| rpsB   | pp | glhX    |
| rpsB   | pp | ppa     |
| rpsB   | pp | rpsP    |
| rpsB   | pp | nuoC    |
| rpsB   | pp | rpsK    |
| rpsB   | pp | rpsM    |
| rpsB   | pp | rpsI    |
| rpsB   | pp | nuoA    |
| rpsB   | pp | nuoK    |
| rpsB   | pp | nuoI    |
| rpsB   | pp | Rv3417c |
| rpsB   | pp | rpsD    |
| rpsB   | pp | rpoA    |
| rpsB   | pp | nuoL    |
| rpsB   | pp | rplQ    |
| rpsB   | pp | nuoH    |
| rpsB   | pp | groS    |
| rpsB   | pp | nuoM    |
| rpsB   | pp | nuoN    |
| rpsC   | pp | rpsD    |
| rpsC   | pp | argF    |
| rpsC   | pp | glvA1   |
| rpsC   | pp | murG    |
| rpsC   | pp | rplE    |
| rpsC   | pp | argS    |
| rpsC   | pp | tpiA    |
| rpsC   | pp | prs     |
| rpsC   | pp | rpsB    |
| rpsC   | pp | rpsI    |
| rpsC   | pp | glnA1   |
| rpsC   | pp | tsf     |
| rpsC   | pp | glhX    |
| rpsC   | pp | fadB    |
| rpsC   | pp | rpsK    |
| rpsC   | pp | atpA    |
| rpsC   | pp | rpoA    |
| rpsC   | pp | shcY    |
| rpsC   | pp | fumC    |
| rpsC   | pp | atpF    |
| rpsC   | pp | gpsi    |
| rpsC   | pp | Rv3417c |
| rpsC   | pp | rpsP    |
| rpsC   | pp | rpsM    |
| rpsC   | pp | ilvB    |
| rpsC   | pp | rpsH    |
| rpsC   | pp | atpG    |
| rpsC   | pp | cysS    |
| rpsC   | pp | ilvC    |
| rpsC   | pp | ppa     |
| rpsC   | pp | atpB    |
| rpsC   | pp | fir     |
| rpsC   | pp | rpsQ    |
| rpsC   | pp | atpD    |
| rpsC   | pp | pdhB    |
| rpsC   | pp | rpsE    |
| rpsC   | pp | rplQ    |
| rpsC   | pp | pyrG    |
| rpsC   | pp | rpsA    |
| rpsD   | pp | rpsM    |
| rpsD   | pp | cysS    |
| rpsD   | pp | rpsK    |
| MT0665 | pp | scpM    |
| pdhC   | pp | nuoH    |
| pdhC   | pp | etfA    |
| pdhC   | pp | nuoD    |
| pdhC   | pp | fadA6   |
| pdhC   | pp | gpsi    |
| pdhC   | pp | pdhB    |
| pdhC   | pp | fir     |
| pdhC   | pp | nuoL    |
| pdhB   | pp | pdsS    |
| pdhB   | pp | Rv3417c |
| pdhB   | pp | etfA    |
| pdhB   | pp | rpsB    |
| pdhB   | pp | rpsI    |
| pdhB   | pp | fadE2.5 |
| pdhB   | pp | fadA6   |
| pdhB   | pp | tsf     |
| pdhB   | pp | ilvC    |
| pdhB   | pp | rplQ    |
| pdhB   | pp | rpsM    |

|      |    |         |
|------|----|---------|
| pdhB | pp | ilvH    |
| pdhB | pp | nuo1    |
| pdhB | pp | ppa     |
| pdhB | pp | nuoD    |
| pdhB | pp | etfB    |
| pdhB | pp | ilvB    |
| pdhB | pp | gpsI    |
| pdhB | pp | ahcY    |
| pdhB | pp | rpoA    |
| tuf  | pp | rpsJ    |
| tuf  | pp | ilvC    |
| tuf  | pp | tsf     |
| tuf  | pp | rpsE    |
| tuf  | pp | rpsI    |
| tuf  | pp | clpP2   |
| tuf  | pp | ilvB    |
| tuf  | pp | ppa     |
| tuf  | pp | pvrG    |
| tuf  | pp | nuoD    |
| tuf  | pp | murG    |
| tuf  | pp | gpsI    |
| tuf  | pp | rplE    |
| tuf  | pp | atpA    |
| tuf  | pp | pdhB    |
| tuf  | pp | nuo1    |
| tuf  | pp | etfA    |
| tuf  | pp | gevT    |
| tuf  | pp | aceE    |
| tuf  | pp | rplQ    |
| tuf  | pp | prs     |
| tuf  | pp | Ry3417c |
| tuf  | pp | rpsQ    |
| tuf  | pp | sucD    |
| tuf  | pp | clpX    |
| tuf  | pp | dlaT    |
| tuf  | pp | sucC    |
| tuf  | pp | mdh     |
| tuf  | pp | rpsK    |
| tuf  | pp | murD    |
| tuf  | pp | rpsM    |
| tuf  | pp | fumC    |
| tuf  | pp | Rv1324  |
| tuf  | pp | atpG    |
| tuf  | pp | rpsD    |
| tuf  | pp | ahcY    |
| tuf  | pp | rpsB    |
| tuf  | pp | rpsA    |
| tuf  | pp | rpsP    |
| tuf  | pp | glnA1   |
| tuf  | pp | atpF    |
| tuf  | pp | tpiA    |
| tuf  | pp | argS    |
| tuf  | pp | atpB    |
| tuf  | pp | fir     |
| tuf  | pp | atpD    |
| tuf  | pp | glvA1   |
| tuf  | pp | rplC    |
| tuf  | pp | groS    |
| tuf  | pp | rpsH    |
| tuf  | pp | metK    |
| tuf  | pp | rpsC    |
| tuf  | pp | rpoA    |
| tuf  | pp | rpsS    |
| tuf  | pp | acpM    |
| tuf  | pp | glx     |
| mdh  | pp | rpsD    |
| mdh  | pp | tal     |
| mdh  | pp | pvrG    |
| mdh  | pp | nuoC    |
| mdh  | pp | dlaT    |
| mdh  | pp | atpA    |
| mdh  | pp | EidA6   |
| mdh  | pp | Ry3417c |
| mdh  | pp | glcH    |
| mdh  | pp | argF    |
| mdh  | pp | sdh     |
| mdh  | pp | gabD2   |
| mdh  | pp | ahcY    |
| mdh  | pp | argH    |
| mdh  | pp | tsf     |
| mdh  | pp | pdhB    |
| mdh  | pp | nuoD    |
| mdh  | pp | gpsI    |
| mdh  | pp | rpoA    |
| mdh  | pp | rpsK    |
| mdh  | pp | atpD    |
| mdh  | pp | tpiA    |
| mdh  | pp | gevT    |
| mdh  | pp | metK    |

|       |    |         |
|-------|----|---------|
| mdh   | pp | sceE    |
| mdh   | pp | kgd     |
| mdh   | pp | clpX    |
| mdh   | pp | etfA    |
| mdh   | pp | nuoB    |
| mdh   | pp | acn     |
| mdh   | pp | groS    |
| mdh   | pp | pdhC    |
| mdh   | pp | gevP    |
| mdh   | pp | glnA1   |
| mdh   | pp | fadA4   |
| mdh   | pp | atpG    |
| mdh   | pp | ilvC    |
| mdh   | pp | rplQ    |
| gltX  | pp | rpoA    |
| gltX  | pp | rpsI    |
| gltX  | pp | rpsD    |
| gltX  | pp | Rv3417c |
| gltX  | pp | ppa     |
| gltX  | pp | rplQ    |
| gltX  | pp | ilvH    |
| gltX  | pp | cysS    |
| gltX  | pp | rpsK    |
| gltX  | pp | entC    |
| gltX  | pp | ilvC    |
| gltX  | pp | rpsM    |
| gltX  | pp | ilvB    |
| ahcY  | pp | rpsD    |
| ahcY  | pp | rpsK    |
| ahcY  | pp | Rv3417c |
| mraY  | pp | pdxT    |
| mraY  | pp | ilvH    |
| mraY  | pp | pdxS    |
| mraY  | pp | murF    |
| mraY  | pp | clpX    |
| mraY  | pp | murE    |
| mraY  | pp | glnA1   |
| mraY  | pp | rpsI    |
| mtrA  | pp | ahcY    |
| gcvH  | pp | dlaT    |
| gcvH  | pp | gpsI    |
| gcvH  | pp | etfA    |
| gcvH  | pp | acpM    |
| gcvH  | pp | ilvC    |
| gcvH  | pp | gevP    |
| gcvH  | pp | ilvB    |
| gcvH  | pp | cfpI7   |
| gcvH  | pp | sevT    |
| gcvH  | pp | groS    |
| gcvH  | pp | ahcY    |
| fabG4 | pp | fadE23  |
| fabG4 | pp | MT0665  |
| fabG3 | pp | acpM    |
| moeA2 | pp | metK    |
| moeA2 | pp | tpiA    |
| moeA2 | pp | gcvH    |
| moeA2 | pp | glnA1   |
| moeA2 | pp | MT0455  |
| gcvP  | pp | ilvH    |
| gcvP  | pp | ilvB    |
| gcvP  | pp | sevT    |
| gcvP  | pp | dlaT    |
| gcvP  | pp | glnA1   |
| gcvP  | pp | Rv3417c |
| gcvP  | pp | ilvC    |
| pntAb | pp | pntB    |
| pntAb | pp | tpiA    |
| gpsI  | pp | nuoI    |
| gpsI  | pp | nuoN    |
| gpsI  | pp | gltX    |
| gpsI  | pp | rpsI    |
| gpsI  | pp | nuoD    |
| gpsI  | pp | etfB    |
| gpsI  | pp | rpsK    |
| gpsI  | pp | tsf     |
| gpsI  | pp | Rv3417c |
| gpsI  | pp | rpsH    |
| gpsI  | pp | cysS    |
| gpsI  | pp | groS    |
| gpsI  | pp | rpoA    |
| gpsI  | pp | rplQ    |
| gpsI  | pp | rpsD    |
| gpsI  | pp | ppa     |
| gpsI  | pp | rpsM    |
| gpsI  | pp | ilvC    |
| gpsI  | pp | rpsP    |
| gpsI  | pp | nuoH    |
| gpsI  | pp | ifr     |
| gpsI  | pp | nuoA    |

|       |    |         |
|-------|----|---------|
| pntAa | pp | kgd     |
| pntAa | pp | pntAb   |
| pntAa | pp | rpoA    |
| pntAa | pp | pntB    |
| pntAa | pp | tpiA    |
| pntAa | pp | rpoB    |
| gevT  | pp | ilvC    |
| gevT  | pp | ilvB    |
| gevT  | pp | pdxT    |
| gevT  | pp | tsf     |
| gevT  | pp | glxX    |
| gevT  | pp | ilvH    |
| gevT  | pp | clpX    |
| gevT  | pp | dlaT    |
| gevT  | pp | glnA1   |
| gevT  | pp | aceE    |
| gevT  | pp | rpsB    |
| gevT  | pp | Rv3417c |
| gevT  | pp | acpM    |
| gevT  | pp | gdh     |
| hsp65 | pp | rpsK    |
| hsp65 | pp | rpsE    |
| hsp65 | pp | ppa     |
| hsp65 | pp | rpsM    |
| hsp65 | pp | rpsD    |
| hsp65 | pp | pvrG    |
| hsp65 | pp | prs     |
| hsp65 | pp | gspI    |
| hsp65 | pp | rpsB    |
| hsp65 | pp | atpC    |
| hsp65 | pp | tuf     |
| hsp65 | pp | altA2   |
| hsp65 | pp | rplC    |
| hsp65 | pp | rplK    |
| hsp65 | pp | fr      |
| hsp65 | pp | glyA1   |
| hsp65 | pp | rplU    |
| hsp65 | pp | fusA    |
| hsp65 | pp | mdh     |
| hsp65 | pp | argF    |
| hsp65 | pp | glxX    |
| hsp65 | pp | tsf     |
| hsp65 | pp | gevP    |
| hsp65 | pp | argS    |
| hsp65 | pp | pdhB    |
| hsp65 | pp | ilvH    |
| hsp65 | pp | acn     |
| hsp65 | pp | clpX    |
| hsp65 | pp | gpmA    |
| hsp65 | pp | gevT    |
| hsp65 | pp | atpD    |
| hsp65 | pp | icl     |
| hsp65 | pp | tpiA    |
| hsp65 | pp | sucC    |
| hsp65 | pp | rpsS    |
| hsp65 | pp | rpoC    |
| hsp65 | pp | ilvC    |
| hsp65 | pp | ahcY    |
| hsp65 | pp | rplQ    |
| hsp65 | pp | rpoA    |
| hsp65 | pp | glnA1   |
| hsp65 | pp | rpoB    |
| hsp65 | pp | cysS    |
| hsp65 | pp | rpsI    |
| hsp65 | pp | rpsG    |
| hsp65 | pp | lnd     |
| hsp65 | pp | rplE    |
| hsp65 | pp | pdsS    |
| hsp65 | pp | argG    |
| hsp65 | pp | metK    |
| hsp65 | pp | clpP2   |
| hsp65 | pp | rpsH    |
| hsp65 | pp | groS    |
| hsp65 | pp | acpM    |
| hsp65 | pp | acr     |
| hsp65 | pp | rpsI    |
| hsp65 | pp | rpsO    |
| hsp65 | pp | atpG    |
| hsp65 | pp | atpA    |
| hsp65 | pp | rpsA    |
| hsp65 | pp | dlaT    |
| hsp65 | pp | rpsC    |
| hsp65 | pp | rplA    |
| hsp65 | pp | rplL    |
| hsp65 | pp | Rv3417c |
| hsp65 | pp | sucD    |
| hsp65 | pp | kgd     |
| hsp65 | pp | rpsP    |
| hsp65 | pp | rpsL    |

|         |    |         |
|---------|----|---------|
| hsp65   | pp | fumC    |
| Rv2140c | pp | MT2199  |
| TB15.3  | pp | scr     |
| glyA1   | pp | argF    |
| glyA1   | pp | gevT    |
| glyA1   | pp | rpsB    |
| glyA1   | pp | argG    |
| glyA1   | pp | gevH    |
| glyA1   | pp | rpoA    |
| glyA1   | pp | ilvB    |
| glyA1   | pp | tsf     |
| glyA1   | pp | murE    |
| glyA1   | pp | mdh     |
| glyA1   | pp | gevP    |
| glyA1   | pp | atpG    |
| glyA1   | pp | pyrG    |
| glyA1   | pp | ilvC    |
| glyA1   | pp | rpsI    |
| glyA1   | pp | murG    |
| glyA1   | pp | Rv3417c |
| glyA1   | pp | fir     |
| glyA1   | pp | clpP2   |
| glyA1   | pp | acpM    |
| glyA1   | pp | ilvH    |
| glyA1   | pp | glxX    |
| glyA1   | pp | atpB    |
| glyA1   | pp | argH    |
| glyA1   | pp | gspI    |
| glyA1   | pp | acn     |
| glyA1   | pp | argS    |
| glyA1   | pp | tpiA    |
| glyA1   | pp | ppa     |
| glyA1   | pp | atpA    |
| glyA1   | pp | rpsP    |
| glyA1   | pp | atpD    |
| glyA1   | pp | pdbB    |
| glyA1   | pp | rplQ    |
| glyA1   | pp | ahcY    |
| glyA1   | pp | rpsD    |
| glyA1   | pp | fumC    |
| glyA1   | pp | rpsM    |
| glyA1   | pp | rpsA    |
| glyA1   | pp | glnA1   |
| glyA1   | pp | rpsK    |
| glyA1   | pp | cysS    |
| glyA1   | pp | metK    |
| ilvB    | pp | rpsM    |
| ilvB    | pp | rpsD    |
| ilvB    | pp | rpsK    |
| ilvB    | pp | rpoA    |
| metK    | pp | ilvB    |
| metK    | pp | clpX    |
| metK    | pp | clpP2   |
| metK    | pp | rpoA    |
| metK    | pp | ahcY    |
| metK    | pp | rpsA    |
| metK    | pp | argF    |
| metK    | pp | groS    |
| metK    | pp | gevT    |
| metK    | pp | uraY    |
| metK    | pp | glxX    |
| metK    | pp | murE    |
| metK    | pp | argG    |
| metK    | pp | glnA1   |
| metK    | pp | Rv1488  |
| metK    | pp | gspI    |
| metK    | pp | tpiA    |
| metK    | pp | etfB    |
| metK    | pp | gevH    |
| metK    | pp | rpsB    |
| metK    | pp | rpsI    |
| metK    | pp | pyrG    |
| metK    | pp | Rv3417c |
| metK    | pp | gevP    |
| metK    | pp | ppa     |
| metK    | pp | rpsD    |
| metK    | pp | argH    |
| metK    | pp | tsf     |
| metK    | pp | acpM    |
| metK    | pp | fir     |
| metK    | pp | ilvC    |
| pdxS    | pp | rpsB    |
| pdxS    | pp | etfB    |
| pdxS    | pp | groS    |
| pdxS    | pp | tsf     |
| atpG    | pp | nuoL    |
| atpG    | pp | rpsB    |
| atpG    | pp | rpsK    |
| atpG    | pp | argG    |

|       |    |         |
|-------|----|---------|
| atpG  | pp | pdhB    |
| atpG  | pp | nuoB    |
| atpG  | pp | aceE    |
| atpG  | pp | nuoN    |
| atpG  | pp | pyrG    |
| atpG  | pp | Rv3417c |
| atpG  | pp | ppa     |
| atpG  | pp | rpsI    |
| atpG  | pp | rpsP    |
| atpG  | pp | gcvT    |
| atpG  | pp | argF    |
| atpG  | pp | nuoC    |
| atpG  | pp | atpD    |
| atpG  | pp | rpIQ    |
| atpG  | pp | atpC    |
| atpG  | pp | pdhC    |
| atpG  | pp | nuoD    |
| atpG  | pp | nuoM    |
| atpG  | pp | rpoA    |
| atpG  | pp | argJ    |
| atpG  | pp | acn     |
| atpG  | pp | acpM    |
| atpG  | pp | rpsD    |
| atpG  | pp | etfA    |
| atpG  | pp | ilvC    |
| atpG  | pp | tpiA    |
| atpG  | pp | nuoA    |
| atpG  | pp | gpiI    |
| atpG  | pp | cysS    |
| atpG  | pp | murE    |
| atpG  | pp | ilvB    |
| atpG  | pp | nuoI    |
| atpG  | pp | nuoK    |
| atpG  | pp | ilvH    |
| atpG  | pp | rpsM    |
| atpG  | pp | nuoH    |
| atpG  | pp | tsf     |
| atpG  | pp | dlaT    |
| qcrB  | pp | nuoC    |
| qcrB  | pp | nuoD    |
| qcrB  | pp | nuoI    |
| qcrB  | pp | nuoH    |
| qcrB  | pp | nuoM    |
| qcrB  | pp | nuoB    |
| qcrB  | pp | nuoK    |
| qcrB  | pp | nuoA    |
| qcrB  | pp | nuoN    |
| grcC1 | pp | clpX    |
| grcC1 | pp | nuoK    |
| grcC1 | pp | etfA    |
| grcC1 | pp | prs     |
| grcC1 | pp | rpsK    |
| pk13  | pp | MT3908  |
| atpF  | pp | gpiI    |
| atpF  | pp | tsf     |
| atpF  | pp | nuoH    |
| atpF  | pp | rpsD    |
| atpF  | pp | rpsI    |
| atpF  | pp | atpA    |
| atpF  | pp | rpsA    |
| atpF  | pp | nuoD    |
| atpF  | pp | dlaT    |
| atpF  | pp | rpIQ    |
| atpF  | pp | rpoA    |
| atpF  | pp | atpG    |
| atpF  | pp | nuoL    |
| atpF  | pp | rpsB    |
| atpF  | pp | rpsK    |
| atpF  | pp | atpC    |
| atpF  | pp | rpsM    |
| atpF  | pp | ilvH    |
| atpF  | pp | nuoK    |
| atpF  | pp | atpD    |
| atpF  | pp | pyrG    |
| atpF  | pp | rps     |
| lba   | pp | rpsA    |
| lba   | pp | ruf     |
| lba   | pp | rpsG    |
| lba   | pp | glx     |
| lba   | pp | cysS    |
| lba   | pp | pyrG    |
| lba   | pp | rpsC    |
| lba   | pp | rpsM    |
| lba   | pp | tpiA    |
| lba   | pp | rpsI    |
| lba   | pp | atpA    |
| lba   | pp | rpoB    |
| lba   | pp | argS    |
| lba   | pp | dlaT    |

|      |    |         |
|------|----|---------|
| lba  | pp | gpsI    |
| lba  | pp | stpB    |
| lba  | pp | metK    |
| lba  | pp | rpoA    |
| lba  | pp | gpmA    |
| lba  | pp | hsp65   |
| lba  | pp | atpD    |
| lba  | pp | sueD    |
| lba  | pp | sueC    |
| lba  | pp | tsf     |
| lba  | pp | rpoC    |
| lba  | pp | rplA    |
| lba  | pp | aceE    |
| lba  | pp | rpsB    |
| lba  | pp | Rv3417c |
| lba  | pp | glvA1   |
| lba  | pp | rplL    |
| lba  | pp | ppa     |
| lba  | pp | icl     |
| lba  | pp | glfA2   |
| lba  | pp | rpsE    |
| lba  | pp | rplQ    |
| lba  | pp | hpd     |
| lba  | pp | fumC    |
| lba  | pp | acn     |
| lba  | pp | mdh     |
| lba  | pp | rplC    |
| lba  | pp | ilvC    |
| lba  | pp | rpsL    |
| lba  | pp | rplK    |
| lba  | pp | argF    |
| lba  | pp | kgd     |
| lba  | pp | tal     |
| lba  | pp | pdhB    |
| lba  | pp | ilvB    |
| lba  | pp | rplE    |
| lba  | pp | clpX    |
| lba  | pp | atpG    |
| lba  | pp | pdhC    |
| atpC | pp | argF    |
| atpC | pp | nuoI    |
| atpC | pp | rpoA    |
| atpC | pp | rpsI    |
| atpC | pp | nuoD    |
| atpC | pp | nuoH    |
| atpC | pp | nuoK    |
| atpC | pp | aceE    |
| atpC | pp | ppa     |
| atpC | pp | groS    |
| atpC | pp | Rv3417c |
| atpC | pp | nuoL    |
| atpC | pp | gpsI    |
| atpC | pp | argI    |
| atpC | pp | nuoA    |
| atpD | pp | ilvC    |
| atpD | pp | nuoH    |
| atpD | pp | sevT    |
| atpD | pp | pdsS    |
| atpD | pp | nuoD    |
| atpD | pp | metK    |
| atpD | pp | nuoN    |
| atpD | pp | acn     |
| atpD | pp | nuoA    |
| atpD | pp | clpP2   |
| atpD | pp | atpC    |
| atpD | pp | ahnA1   |
| atpD | pp | argG    |
| atpD | pp | tsf     |
| atpD | pp | etfA    |
| atpD | pp | rpsI    |
| atpD | pp | cysS    |
| atpD | pp | rpsK    |
| atpD | pp | nuoK    |
| atpD | pp | nuoC    |
| atpD | pp | tpiA    |
| atpD | pp | pdhC    |
| atpD | pp | Rv3417c |
| atpD | pp | murE    |
| atpD | pp | ppa     |
| atpD | pp | glfX    |
| atpD | pp | pdhB    |
| atpD | pp | nuoB    |
| atpD | pp | argI    |
| atpD | pp | rpsD    |
| atpD | pp | nuoL    |
| atpD | pp | rplQ    |
| atpD | pp | gpsI    |
| atpD | pp | rpoA    |
| atpD | pp | rpsP    |



|        |    |         |
|--------|----|---------|
| atpD   | pp | pyrG    |
| atpD   | pp | scpM    |
| atpD   | pp | rpsM    |
| atpD   | pp | groS    |
| atpD   | pp | rpsB    |
| atpD   | pp | nuoI    |
| atpD   | pp | rpsA    |
| atpD   | pp | gevP    |
| atpD   | pp | clpX    |
| atpD   | pp | ahcY    |
| atpD   | pp | nuoM    |
| atpD   | pp | argF    |
| atpD   | pp | dlaT    |
| atpD   | pp | ilvB    |
| Rv1488 | pp | gpsI    |
| Rv1488 | pp | gevP    |
| Rv1488 | pp | ahcY    |
| Rv1488 | pp | murE    |
| Rv1488 | pp | ilvC    |
| atpA   | pp | Rv3417c |
| atpA   | pp | pdxT    |
| atpA   | pp | atpD    |
| atpA   | pp | argF    |
| atpA   | pp | scpM    |
| atpA   | pp | nuoK    |
| atpA   | pp | gevP    |
| atpA   | pp | dlaT    |
| atpA   | pp | glnA1   |
| atpA   | pp | rpsK    |
| atpA   | pp | gpsI    |
| atpA   | pp | rpsP    |
| atpA   | pp | nuoD    |
| atpA   | pp | nuoC    |
| atpA   | pp | argJ    |
| atpA   | pp | acn     |
| atpA   | pp | pdcC    |
| atpA   | pp | atpC    |
| atpA   | pp | nuoM    |
| atpA   | pp | fir     |
| atpA   | pp | etfA    |
| atpA   | pp | aceE    |
| atpA   | pp | pyrG    |
| atpA   | pp | mraY    |
| atpA   | pp | rpsD    |
| atpA   | pp | rpsI    |
| atpA   | pp | ahcY    |
| atpA   | pp | ppa     |
| atpA   | pp | rpsA    |
| atpA   | pp | etfB    |
| atpA   | pp | nuoA    |
| atpA   | pp | rpsM    |
| atpA   | pp | nuoI    |
| atpA   | pp | groS    |
| atpA   | pp | nuoH    |
| atpA   | pp | pdbB    |
| atpA   | pp | tsf     |
| atpA   | pp | metK    |
| atpA   | pp | rnIQ    |
| atpA   | pp | tpiA    |
| atpA   | pp | nuoB    |
| atpA   | pp | nuoL    |
| atpA   | pp | clpP2   |
| atpA   | pp | rpsB    |
| atpA   | pp | pdsS    |
| atpA   | pp | glx     |
| atpA   | pp | atpG    |
| atpA   | pp | spoA    |
| atpA   | pp | murE    |
| atpA   | pp | nuoN    |
| atpB   | pp | rpsK    |
| atpB   | pp | atpD    |
| atpB   | pp | nuoL    |
| atpB   | pp | nuoB    |
| atpB   | pp | nuoC    |
| atpB   | pp | nuoH    |
| atpB   | pp | nuoA    |
| atpB   | pp | nuoI    |
| atpB   | pp | murE    |
| atpB   | pp | atpF    |
| atpB   | pp | rnIQ    |
| atpB   | pp | tpiA    |
| atpB   | pp | ppa     |
| atpB   | pp | gpsI    |
| atpB   | pp | nuoK    |
| atpB   | pp | rpsP    |
| atpB   | pp | argF    |
| atpB   | pp | rpsB    |
| atpB   | pp | nuoN    |
| atpB   | pp | tsf     |

|      |    |          |
|------|----|----------|
| atpB | pp | atpG     |
| atpB | pp | rpsI     |
| atpB | pp | nuoM     |
| atpB | pp | nuoD     |
| atpB | pp | rpsM     |
| atpB | pp | atpC     |
| atpB | pp | frr      |
| atpB | pp | atpA     |
| atpB | pp | rpoA     |
| atpB | pp | pyrG     |
| atpB | pp | rpsD     |
| atpB | pp | argJ     |
| etfA | pp | fadA6    |
| etfA | pp | nuoB     |
| etfA | pp | nuoI     |
| etfA | pp | nuoD     |
| etfA | pp | nuoC     |
| etfA | pp | MT3321   |
| etfA | pp | etfB     |
| etfA | pp | ahcY     |
| etfA | pp | fadF25   |
| etfB | pp | fadA6    |
| etfB | pp | nuoI     |
| etfB | pp | nuoB     |
| etfB | pp | nuoC     |
| etfB | pp | fadF25   |
| mmsA | pp | sucD     |
| mmsA | pp | gltA2    |
| mmsA | pp | fadF23   |
| mmsA | pp | sucC     |
| mmsA | pp | fadB     |
| ilvH | pp | Rv3417c  |
| ilvH | pp | ilvB     |
| ilvH | pp | cysS     |
| pdxT | pp | pdxS     |
| ilvC | pp | rplQ     |
| ilvC | pp | rpsI     |
| ilvC | pp | ilvH     |
| ilvC | pp | etfB     |
| ilvC | pp | rpoA     |
| ilvC | pp | ilvB     |
| ilvC | pp | rpsM     |
| ilvC | pp | cysS     |
| ilvC | pp | rpsK     |
| ilvC | pp | Rv3417c  |
| ilvC | pp | rpsD     |
| ilvC | pp | ahcY     |
| ilvD | pp | fumC     |
| ilvD | pp | pyrG     |
| ilvD | pp | Rv3417c  |
| ilvD | pp | gltX     |
| ilvD | pp | glnA1    |
| ilvD | pp | ilvC     |
| ilvD | pp | rplK     |
| ilvD | pp | ilvB     |
| ilvD | pp | cysS     |
| ilvD | pp | rpsL     |
| ilvD | pp | clpP2    |
| ilvD | pp | tsf      |
| ilvD | pp | metK     |
| ilvD | pp | ilvH     |
| ilvD | pp | rpsH     |
| ilvD | pp | argH     |
| ilvD | pp | atpG     |
| ilvD | pp | fba      |
| ilvD | pp | rpsI     |
| ilvD | pp | rpsB     |
| ilvD | pp | MRA 1170 |
| ilvD | pp | gcvT     |
| ilvD | pp | rplC     |
| ilvD | pp | hsp65    |
| ilvD | pp | sucD     |
| ilvD | pp | ahcY     |
| ilvD | pp | argG     |
| ilvD | pp | argS     |
| ilvD | pp | atpD     |
| ilvD | pp | tniA     |
| ilvD | pp | ndh      |
| ilvD | pp | pdhB     |
| ilvD | pp | MT1239   |
| ilvD | pp | pdhC     |
| ilvD | pp | rpsM     |
| ilvD | pp | frr      |
| ilvD | pp | rpoC     |
| ilvD | pp | rpoA     |
| ilvD | pp | argJ     |
| ilvD | pp | prs      |
| ilvD | pp | gltA2    |
| ilvD | pp | tuf      |

|         |    |         |
|---------|----|---------|
| ilvD    | pp | dnaK    |
| ilvD    | pp | acn     |
| ilvD    | pp | rpsK    |
| ilvD    | pp | rpIE    |
| ilvD    | pp | gevP    |
| ilvD    | pp | dlaT    |
| ilvD    | pp | rpoB    |
| ilvD    | pp | argF    |
| ilvD    | pp | kgd     |
| ilvD    | pp | sucC    |
| ilvD    | pp | glyA1   |
| MT11773 | pp | acr     |
| fusA    | pp | nuoM    |
| fusA    | pp | rpsQ    |
| fusA    | pp | glyA1   |
| fusA    | pp | pdhB    |
| fusA    | pp | frt     |
| fusA    | pp | gevH    |
| fusA    | pp | rpIC    |
| fusA    | pp | sucD    |
| fusA    | pp | eltX    |
| fusA    | pp | pvrG    |
| fusA    | pp | cysS    |
| fusA    | pp | acpM    |
| fusA    | pp | ilvB    |
| fusA    | pp | rpsE    |
| fusA    | pp | rpsA    |
| fusA    | pp | clpP2   |
| fusA    | pp | rpsP    |
| fusA    | pp | eltA2   |
| fusA    | pp | ilvC    |
| fusA    | pp | metK    |
| fusA    | pp | rpsS    |
| fusA    | pp | nuoA    |
| fusA    | pp | gpiI    |
| fusA    | pp | rpIQ    |
| fusA    | pp | aceE    |
| fusA    | pp | rpsD    |
| fusA    | pp | gevT    |
| fusA    | pp | kgd     |
| fusA    | pp | atpF    |
| fusA    | pp | rpIE    |
| fusA    | pp | argF    |
| fusA    | pp | murD    |
| fusA    | pp | atpB    |
| fusA    | pp | rpsB    |
| fusA    | pp | nuoI    |
| fusA    | pp | atpD    |
| fusA    | pp | rpsH    |
| fusA    | pp | acn     |
| fusA    | pp | clpX    |
| fusA    | pp | nuoL    |
| fusA    | pp | groS    |
| fusA    | pp | rpoA    |
| fusA    | pp | atpG    |
| fusA    | pp | sucC    |
| fusA    | pp | dlaT    |
| fusA    | pp | etfB    |
| fusA    | pp | rpsI    |
| fusA    | pp | tsf     |
| fusA    | pp | rpsK    |
| fusA    | pp | argG    |
| fusA    | pp | rdh     |
| fusA    | pp | rpsI    |
| fusA    | pp | atpA    |
| fusA    | pp | tuf     |
| fusA    | pp | ppa     |
| fusA    | pp | tpiA    |
| fusA    | pp | nuoC    |
| fusA    | pp | rpsM    |
| fusA    | pp | nuoD    |
| fusA    | pp | prs     |
| fusA    | pp | fumC    |
| fusA    | pp | Rv3417c |
| fusA    | pp | rpsC    |
| fusA    | pp | argS    |
| fusA    | pp | nuoB    |
| fusA    | pp | glnA1   |
| fusA    | pp | gevP    |
| groS    | pp | rpsD    |
| groS    | pp | rpsM    |
| groS    | pp | rpIQ    |
| groS    | pp | rpoA    |
| groS    | pp | rpsI    |
| groS    | pp | ppa     |
| groS    | pp | rpsK    |
| MT1239  | pp | tsf     |
| MT1239  | pp | rpmB3   |
| MT1239  | pp | ilvC    |

|        |    |         |
|--------|----|---------|
| MT1239 | pp | rpsB    |
| MT1239 | pp | murG    |
| pckG   | pp | tpiA    |
| pckG   | pp | gdh     |
| pckG   | pp | pdhC    |
| pckG   | pp | gabD2   |
| pckG   | pp | pdhB    |
| pckG   | pp | gleB    |
| pckG   | pp | icl     |
| pckG   | pp | aceE    |
| pckG   | pp | mdh     |
| pckG   | pp | citA    |
| pckG   | pp | gltA2   |
| pckG   | pp | argH    |
| gpmA   | pp | fumC    |
| gpmA   | pp | tal     |
| gpmA   | pp | metK    |
| gpmA   | pp | sevH    |
| gpmA   | pp | pvrG    |
| gpmA   | pp | tuf     |
| gpmA   | pp | rpIJ    |
| gpmA   | pp | prs     |
| gpmA   | pp | dlaT    |
| gpmA   | pp | mdh     |
| gpmA   | pp | sucD    |
| gpmA   | pp | rpsK    |
| gpmA   | pp | gltA2   |
| gpmA   | pp | fusA    |
| gpmA   | pp | groS    |
| gpmA   | pp | ilvC    |
| gpmA   | pp | atpG    |
| gpmA   | pp | fir     |
| gpmA   | pp | rpsP    |
| gpmA   | pp | kad     |
| gpmA   | pp | atpD    |
| gpmA   | pp | tsf     |
| gpmA   | pp | tpiA    |
| gpmA   | pp | sucC    |
| gpmA   | pp | atpA    |
| gpmA   | pp | rpIL    |
| gpmA   | pp | rpIE    |
| gpmA   | pp | argF    |
| gpmA   | pp | rpsG    |
| gpmA   | pp | glnA1   |
| gpmA   | pp | Rv3417c |
| gpmA   | pp | clpX    |
| gpmA   | pp | aceE    |
| gpmA   | pp | pdhB    |
| gpmA   | pp | rpsL    |
| dnaJ1  | pp | ppa     |
| dnaJ1  | pp | pvrG    |
| dnaJ1  | pp | Rv3417c |
| dnaJ1  | pp | tuf     |
| dnaJ1  | pp | acr     |
| dnaJ1  | pp | hsp65   |
| dnaJ1  | pp | groS    |
| dnaJ1  | pp | gltX    |
| dnaJ1  | pp | metK    |
| dnaJ1  | pp | prs     |
| dnaJ1  | pp | clpX    |
| nuoD   | pp | nuoM    |
| nuoD   | pp | nuoH    |
| nuoD   | pp | nuoK    |
| nuoD   | pp | rpsD    |
| nuoD   | pp | rpoA    |
| nuoD   | pp | nuoI    |
| nuoD   | pp | nuoN    |
| nuoD   | pp | ppa     |
| nuoD   | pp | nuoL    |
| aceE   | pp | sepM    |
| aceE   | pp | rpoA    |
| aceE   | pp | ilvH    |
| aceE   | pp | pdhC    |
| aceE   | pp | tsf     |
| aceE   | pp | rpsM    |
| aceE   | pp | groS    |
| aceE   | pp | pdhB    |
| aceE   | pp | rpsD    |
| aceE   | pp | gpiI    |
| aceE   | pp | ilvB    |
| nuoA   | pp | nuoN    |
| nuoA   | pp | nuoB    |
| nuoA   | pp | nuoL    |
| nuoA   | pp | nuoD    |
| nuoA   | pp | nuoH    |
| nuoA   | pp | ppa     |
| nuoA   | pp | nuoC    |
| nuoA   | pp | nuoM    |
| nuoA   | pp | nuoI    |

|       |    |         |
|-------|----|---------|
| nuoA  | pp | nuoK    |
| fadE5 | pp | fadB    |
| fadE5 | pp | echA21  |
| fadE5 | pp | etfA    |
| fadE5 | pp | etfB    |
| fadE5 | pp | fadA    |
| fadE5 | pp | MT2242  |
| fadE4 | pp | fadA    |
| fadE4 | pp | fadA6   |
| fadE4 | pp | fadB    |
| fadE4 | pp | fadA4   |
| fadE4 | pp | echA21  |
| fadE4 | pp | mmsA    |
| fadE4 | pp | fadE23  |
| fadE4 | pp | MT2242  |
| nuoC  | pp | nuoK    |
| nuoC  | pp | nuoM    |
| nuoC  | pp | nuoL    |
| nuoC  | pp | nuoD    |
| nuoC  | pp | nuoN    |
| nuoC  | pp | nuoH    |
| nuoC  | pp | nuoI    |
| fadE6 | pp | fadB    |
| fadE6 | pp | echA21  |
| fadE6 | pp | MT2242  |
| nuoB  | pp | nuoN    |
| nuoB  | pp | nuoK    |
| nuoB  | pp | nuoI    |
| nuoB  | pp | nuoH    |
| nuoB  | pp | nuoL    |
| nuoB  | pp | nuoM    |
| nuoB  | pp | nuoC    |
| nuoB  | pp | nuoD    |
| glnA1 | pp | gltX    |
| glnA1 | pp | rplQ    |
| glnA1 | pp | ppa     |
| glnA1 | pp | rpsI    |
| glnA1 | pp | rpsB    |
| glnA1 | pp | groS    |
| glnA1 | pp | pdhC    |
| glnA1 | pp | gdh     |
| glnA1 | pp | ilvB    |
| glnA1 | pp | etfA    |
| glnA1 | pp | cysS    |
| glnA1 | pp | ilvC    |
| glnA1 | pp | aceE    |
| glnA1 | pp | rpsD    |
| glnA1 | pp | MT3777  |
| glnA1 | pp | rpoA    |
| glnA1 | pp | pdhB    |
| glnA1 | pp | gpiI    |
| glnA1 | pp | tsf     |
| glnA1 | pp | Rv3417c |
| rpoA  | pp | ppa     |
| rpoA  | pp | rpsM    |
| rpoA  | pp | cysS    |
| rpoA  | pp | rpsD    |
| rpoA  | pp | rpsK    |
| rpoA  | pp | MT3777  |
| rpoB  | pp | MT3777  |
| rpoB  | pp | rpsP    |
| rpoB  | pp | sucD    |
| rpoB  | pp | ndh     |
| rpoB  | pp | cysS    |
| rpoB  | pp | atpB    |
| rpoB  | pp | rpsK    |
| rpoB  | pp | rpsG    |
| rpoB  | pp | rpsM    |
| rpoB  | pp | rpsI    |
| rpoB  | pp | atpG    |
| rpoB  | pp | groS    |
| rpoB  | pp | ilvC    |
| rpoB  | pp | glnA1   |
| rpoB  | pp | rplC    |
| rpoB  | pp | glyA1   |
| rpoB  | pp | argF    |
| rpoB  | pp | nuoL    |
| rpoB  | pp | rplE    |
| rpoB  | pp | nuoN    |
| rpoB  | pp | rpsA    |
| rpoB  | pp | rpsL    |
| rpoB  | pp | fisA    |
| rpoB  | pp | tsf     |
| rpoB  | pp | rpsE    |
| rpoB  | pp | ftr     |
| rpoB  | pp | gpiI    |
| rpoB  | pp | ilvH    |
| rpoB  | pp | rpsD    |
| rpoB  | pp | ppa     |

|         |    |         |
|---------|----|---------|
| rpoB    | pp | clpX    |
| rpoB    | pp | sepM    |
| rpoB    | pp | sucC    |
| rpoB    | pp | kgd     |
| rpoB    | pp | tal     |
| rpoB    | pp | metK    |
| rpoB    | pp | rpsC    |
| rpoB    | pp | nuoD    |
| rpoB    | pp | ilvB    |
| rpoB    | pp | tpiA    |
| rpoB    | pp | tuf     |
| rpoB    | pp | murG    |
| rpoB    | pp | nuoM    |
| rpoB    | pp | rplQ    |
| rpoB    | pp | nuoH    |
| rpoB    | pp | acn     |
| rpoB    | pp | rpsS    |
| rpoB    | pp | atpD    |
| rpoB    | pp | glxX    |
| rpoB    | pp | devR    |
| rpoB    | pp | aceE    |
| rpoB    | pp | clpP2   |
| rpoB    | pp | pyrG    |
| rpoB    | pp | prs     |
| rpoB    | pp | rpsI    |
| rpoB    | pp | gluA2   |
| rpoB    | pp | rpsQ    |
| rpoB    | pp | Rv3417c |
| rpoB    | pp | rpsH    |
| rpoB    | pp | fumC    |
| rpoB    | pp | argS    |
| rpoB    | pp | atpF    |
| rpoB    | pp | rpoA    |
| rpoB    | pp | rpoC    |
| rpoB    | pp | rpsB    |
| rpoB    | pp | atpA    |
| MRA 117 | pp | gevT    |
| MRA 117 | pp | nuoN    |
| MRA 117 | pp | nuoM    |
| rpoC    | pp | sucD    |
| rpoC    | pp | atpA    |
| rpoC    | pp | metK    |
| rpoC    | pp | glnA1   |
| rpoC    | pp | argF    |
| rpoC    | pp | rpsI    |
| rpoC    | pp | ppa     |
| rpoC    | pp | nuoH    |
| rpoC    | pp | tsf     |
| rpoC    | pp | ilvC    |
| rpoC    | pp | Rv3417c |
| rpoC    | pp | rpsL    |
| rpoC    | pp | rpsD    |
| rpoC    | pp | rpsH    |
| rpoC    | pp | sucC    |
| rpoC    | pp | rpsB    |
| rpoC    | pp | rpsM    |
| rpoC    | pp | murD    |
| rpoC    | pp | argS    |
| rpoC    | pp | rpsQ    |
| rpoC    | pp | rpsC    |
| rpoC    | pp | rpsP    |
| rpoC    | pp | prs     |
| rpoC    | pp | rpoA    |
| rpoC    | pp | rplC    |
| rpoC    | pp | rpsK    |
| rpoC    | pp | glyA1   |
| rpoC    | pp | rpsA    |
| rpoC    | pp | clpP2   |
| rpoC    | pp | rpsI    |
| rpoC    | pp | rpsE    |
| rpoC    | pp | BusA    |
| rpoC    | pp | fir     |
| rpoC    | pp | ilvH    |
| rpoC    | pp | ilvB    |
| rpoC    | pp | atpD    |
| rpoC    | pp | rplQ    |
| rpoC    | pp | clpX    |
| rpoC    | pp | rplE    |
| rpoC    | pp | tpiA    |
| rpoC    | pp | fumC    |
| rpoC    | pp | atpG    |
| rpoC    | pp | glxX    |
| rpoC    | pp | rpsG    |
| rpoC    | pp | rpsI    |
| rpoC    | pp | aceE    |
| rpoC    | pp | cysS    |
| rpoC    | pp | tuf     |
| rpoC    | pp | pyrG    |
| rpoC    | pp | MT3777  |

|      |    |         |
|------|----|---------|
| rpoC | pp | rpsS    |
| citA | pp | pyrG    |
| citA | pp | mdh     |
| citA | pp | acn     |
| citA | pp | argH    |
| citA | pp | gdh     |
| citA | pp | fadA6   |
| citA | pp | kgd     |
| citA | pp | gleB    |
| citA | pp | pdhC    |
| citA | pp | gabD2   |
| citA | pp | sucD    |
| citA | pp | fadA4   |
| citA | pp | gltA2   |
| citA | pp | aceE    |
| citA | pp | sucC    |
| kgd  | pp | atpG    |
| kgd  | pp | aceE    |
| kgd  | pp | ilvH    |
| kgd  | pp | nuoA    |
| kgd  | pp | Rv3417c |
| kgd  | pp | argG    |
| kgd  | pp | ilvC    |
| kgd  | pp | nuoC    |
| kgd  | pp | gevH    |
| kgd  | pp | tpiA    |
| kgd  | pp | nuoK    |
| kgd  | pp | dlaT    |
| kgd  | pp | fir     |
| kgd  | pp | nuoH    |
| kgd  | pp | atpD    |
| kgd  | pp | spsI    |
| kgd  | pp | pdhC    |
| kgd  | pp | argH    |
| kgd  | pp | gevT    |
| kgd  | pp | argF    |
| kgd  | pp | gevP    |
| kgd  | pp | cfp17   |
| kgd  | pp | glnA1   |
| kgd  | pp | acn     |
| kgd  | pp | ilvB    |
| kgd  | pp | tsf     |
| kgd  | pp | nuoB    |
| kgd  | pp | nuoL    |
| kgd  | pp | nuoD    |
| kgd  | pp | nuoI    |
| kgd  | pp | gabD2   |
| kgd  | pp | clpX    |
| kgd  | pp | atpA    |
| fadB | pp | rpsB    |
| fadB | pp | gltA2   |
| fadB | pp | etfA    |
| fadB | pp | echA21  |
| fadB | pp | fadE23  |
| fadB | pp | MT2242  |
| fadB | pp | fadA4   |
| fadB | pp | fadA6   |
| fadB | pp | etfB    |
| fadB | pp | atpD    |
| fadB | pp | tsf     |
| fadB | pp | mdh     |
| fadB | pp | fumC    |
| fadB | pp | fadE25  |
| tsf  | pp | ilvB    |
| tsf  | pp | groS    |
| tsf  | pp | rpsK    |
| tsf  | pp | nuoA    |
| tsf  | pp | ilvH    |
| tsf  | pp | nuoM    |
| tsf  | pp | ilvC    |
| tsf  | pp | nuoI    |
| tsf  | pp | rpoQ    |
| tsf  | pp | rpsB    |
| tsf  | pp | nuoD    |
| tsf  | pp | rps     |
| tsf  | pp | cysS    |
| tsf  | pp | nuoH    |
| tsf  | pp | rpsM    |
| tsf  | pp | rpsP    |
| tsf  | pp | nuoL    |
| tsf  | pp | nuoC    |
| tsf  | pp | Rv3417c |
| tsf  | pp | nuoB    |
| tsf  | pp | gltX    |
| tsf  | pp | rpsI    |
| tsf  | pp | rpsD    |
| tsf  | pp | rpoA    |
| tsf  | pp | nuoK    |
| tsf  | pp | etfB    |

|       |    |         |
|-------|----|---------|
| fadA  | pp | glcB    |
| fadA  | pp | echA21  |
| fadA  | pp | fadA6   |
| fadA  | pp | fadE25  |
| fadA  | pp | dlaT    |
| fadA  | pp | fabG    |
| fadA  | pp | mdh     |
| fadA  | pp | fadB    |
| fadA  | pp | etfB    |
| fadA  | pp | sucD    |
| fadA  | pp | gltA2   |
| fadA  | pp | fadA4   |
| fadA  | pp | citA    |
| fadA  | pp | fadE23  |
| fadA  | pp | sucC    |
| fadA  | pp | pdcC    |
| fadA  | pp | etfA    |
| des   | pp | MT3964  |
| gltA2 | pp | atpA    |
| gltA2 | pp | gevT    |
| gltA2 | pp | sucD    |
| gltA2 | pp | nuoH    |
| gltA2 | pp | gltX    |
| gltA2 | pp | ppa     |
| gltA2 | pp | nuoN    |
| gltA2 | pp | nuoA    |
| gltA2 | pp | pdbB    |
| gltA2 | pp | acn     |
| gltA2 | pp | nuoM    |
| gltA2 | pp | glvA1   |
| gltA2 | pp | clpX    |
| gltA2 | pp | kgd     |
| gltA2 | pp | clpP2   |
| gltA2 | pp | fumC    |
| gltA2 | pp | nuoD    |
| gltA2 | pp | tpiA    |
| gltA2 | pp | argF    |
| gltA2 | pp | sucC    |
| gltA2 | pp | ilvH    |
| gltA2 | pp | dlaT    |
| gltA2 | pp | pyrG    |
| gltA2 | pp | rpsI    |
| gltA2 | pp | gabD2   |
| gltA2 | pp | etfA    |
| gltA2 | pp | atpG    |
| gltA2 | pp | gdh     |
| gltA2 | pp | Rv3417c |
| gltA2 | pp | fadA4   |
| gltA2 | pp | aceE    |
| gltA2 | pp | ilvB    |
| gltA2 | pp | atpD    |
| gltA2 | pp | rpsA    |
| gltA2 | pp | argH    |
| gltA2 | pp | tal     |
| gltA2 | pp | nuoL    |
| gltA2 | pp | ilvC    |
| gltA2 | pp | pdcC    |
| gltA2 | pp | rpsI    |
| gltA2 | pp | metK    |
| gltA2 | pp | etfB    |
| gltA2 | pp | rpoA    |
| gltA2 | pp | rpsK    |
| gltA2 | pp | glcB    |
| gltA2 | pp | rpsD    |
| gltA2 | pp | acr     |
| gltA2 | pp | groS    |
| gltA2 | pp | mdh     |
| gltA2 | pp | argG    |
| gltA2 | pp | gevP    |
| gltA2 | pp | nuoI    |
| gltA2 | pp | fadA6   |
| gltA2 | pp | glnA1   |
| gltA2 | pp | nuoK    |
| rpII  | pp | rpsP    |
| rpII  | pp | rpsD    |
| rpII  | pp | gltX    |
| rpII  | pp | metK    |
| rpII  | pp | rpsG    |
| rpII  | pp | rplA    |
| rpII  | pp | pyrG    |
| rpII  | pp | sucD    |
| rpII  | pp | murE    |
| rpII  | pp | atpG    |
| rpII  | pp | cysS    |
| rpII  | pp | atpA    |
| rpII  | pp | dlaT    |
| rpII  | pp | nuoI    |
| rpII  | pp | rpsI    |
| rpII  | pp | groS    |



|      |    |         |
|------|----|---------|
| rplL | pp | Rv3417c |
| rplL | pp | nuoC    |
| rplL | pp | rpsE    |
| rplL | pp | ilvC    |
| rplL | pp | atpB    |
| rplL | pp | rpsI    |
| rplL | pp | atpD    |
| rplL | pp | ppa     |
| rplL | pp | rpsB    |
| rplL | pp | glyA1   |
| rplL | pp | prs     |
| rplL | pp | rpsJ    |
| rplL | pp | glnA1   |
| rplL | pp | rpsS    |
| rplL | pp | fir     |
| rplL | pp | ahcY    |
| rplL | pp | tuf     |
| rplL | pp | fusA    |
| rplL | pp | argG    |
| rplL | pp | nuoD    |
| rplL | pp | rpsH    |
| rplL | pp | rplE    |
| rplL | pp | aceE    |
| rplL | pp | ilvB    |
| rplL | pp | rpsM    |
| rplL | pp | sucC    |
| rplL | pp | atpF    |
| rplL | pp | rpsC    |
| rplL | pp | tsf     |
| rplL | pp | argS    |
| rplL | pp | rpoC    |
| rplL | pp | rpsA    |
| rplL | pp | rpoA    |
| rplL | pp | etfA    |
| rplL | pp | rpoB    |
| rplL | pp | fumC    |
| rplL | pp | clpP2   |
| rplL | pp | rpsQ    |
| rplL | pp | rplQ    |
| rplL | pp | rpsK    |
| rplL | pp | nuoB    |
| rplL | pp | gevT    |
| rplL | pp | rpsL    |
| rplL | pp | rplC    |
| rplA | pp | cvsS    |
| rplA | pp | nuoH    |
| rplA | pp | rpsB    |
| rplA | pp | argH    |
| rplA | pp | groS    |
| rplA | pp | glnA1   |
| rplA | pp | fidA6   |
| rplA | pp | nuoI    |
| rplA | pp | pdhB    |
| rplA | pp | tal     |
| rplA | pp | fir     |
| rplA | pp | mraY    |
| rplA | pp | tsf     |
| rplA | pp | nuoD    |
| rplA | pp | acpM    |
| rplA | pp | ilvC    |
| rplA | pp | rpoA    |
| rplA | pp | Rv3417c |
| rplA | pp | rpsI    |
| rplA | pp | nuoK    |
| rplA | pp | gevH    |
| rplA | pp | clpP2   |
| rplA | pp | nuoC    |
| rplA | pp | gevT    |
| rplA | pp | etfB    |
| rplA | pp | glx     |
| rplA | pp | pyrG    |
| rplA | pp | murD    |
| rplA | pp | pdhC    |
| rplA | pp | nuoB    |
| rplA | pp | nuoL    |
| rplA | pp | dlaT    |
| rplA | pp | nuoM    |
| rplA | pp | etfA    |
| rplA | pp | ahcY    |
| rplA | pp | rpsA    |
| rplA | pp | argF    |
| rplA | pp | rpsK    |
| rplA | pp | ppa     |
| rplA | pp | ilvB    |
| rplA | pp | nuoA    |
| rplA | pp | acn     |
| rplA | pp | gpiI    |
| rplA | pp | argG    |
| rplJ | pp | rpsB    |

|        |    |         |
|--------|----|---------|
| rplJ   | pp | Rv3417c |
| rplJ   | pp | nuoH    |
| rplJ   | pp | rpsA    |
| rplJ   | pp | rpsH    |
| rplJ   | pp | rpsI    |
| rplJ   | pp | gevT    |
| rplJ   | pp | rpoC    |
| rplJ   | pp | ftr     |
| rplJ   | pp | rpoA    |
| rplJ   | pp | argS    |
| rplJ   | pp | prs     |
| rplJ   | pp | clpX    |
| rplJ   | pp | rpsD    |
| rplJ   | pp | rpsS    |
| rplJ   | pp | rpsP    |
| rplJ   | pp | rpsQ    |
| rplJ   | pp | aceE    |
| rplJ   | pp | tpiA    |
| rplJ   | pp | rplL    |
| rplJ   | pp | rplQ    |
| rplJ   | pp | atpG    |
| rplJ   | pp | ppa     |
| rplJ   | pp | fusA    |
| rplJ   | pp | rpsC    |
| rplJ   | pp | cysS    |
| rplJ   | pp | sucD    |
| rplJ   | pp | atpA    |
| rplJ   | pp | pyrG    |
| rplJ   | pp | nuoL    |
| rplJ   | pp | atpF    |
| rplJ   | pp | rpsE    |
| rplJ   | pp | gpsI    |
| rplJ   | pp | rpsJ    |
| rplJ   | pp | atpD    |
| rplJ   | pp | rpsK    |
| rplJ   | pp | murD    |
| rplJ   | pp | rpoB    |
| rplJ   | pp | rpsL    |
| rplJ   | pp | glyA1   |
| rplJ   | pp | rpsG    |
| rplJ   | pp | argG    |
| rplJ   | pp | rplC    |
| rplJ   | pp | nuoD    |
| rplJ   | pp | tuf     |
| rplJ   | pp | rplE    |
| rplJ   | pp | sucC    |
| rplJ   | pp | ilvC    |
| rplJ   | pp | rpsM    |
| rplJ   | pp | acn     |
| rplJ   | pp | glxX    |
| rplJ   | pp | tsf     |
| rplJ   | pp | groS    |
| MT2242 | pp | fadE23  |
| MT2242 | pp | fadE25  |
| rplK   | pp | argS    |
| rplK   | pp | rpsM    |
| rplK   | pp | clpX    |
| rplK   | pp | nuoD    |
| rplK   | pp | fusA    |
| rplK   | pp | pyrG    |
| rplK   | pp | gpsI    |
| rplK   | pp | cysS    |
| rplK   | pp | rpmB3   |
| rplK   | pp | rpoA    |
| rplK   | pp | fadB    |
| rplK   | pp | rplQ    |
| rplK   | pp | rpsH    |
| rplK   | pp | clpP2   |
| rplK   | pp | rplE    |
| rplK   | pp | rpsC    |
| rplK   | pp | fumC    |
| rplK   | pp | atpD    |
| rplK   | pp | atpA    |
| rplK   | pp | rpoB    |
| rplK   | pp | Rv3417c |
| rplK   | pp | ppa     |
| rplK   | pp | rpsI    |
| rplK   | pp | ilvC    |
| rplK   | pp | rplA    |
| rplK   | pp | glxX    |
| rplK   | pp | acpM    |
| rplK   | pp | ilvH    |
| rplK   | pp | glyA1   |
| rplK   | pp | murD    |
| rplK   | pp | tpiA    |
| rplK   | pp | rplC    |
| rplK   | pp | rpsS    |
| rplK   | pp | tsf     |
| rplK   | pp | atpF    |

|        |    |         |
|--------|----|---------|
| rplK   | pp | ilvB    |
| rplK   | pp | rpsG    |
| rplK   | pp | tuf     |
| rplK   | pp | rpsA    |
| rplK   | pp | rpsE    |
| rplK   | pp | rpsQ    |
| rplK   | pp | nuoC    |
| rplK   | pp | rpsL    |
| rplK   | pp | fir     |
| rplK   | pp | atpG    |
| rplK   | pp | pdbB    |
| rplK   | pp | rpoC    |
| rplK   | pp | rpsK    |
| rplK   | pp | atpB    |
| rplK   | pp | rplJ    |
| rplK   | pp | rpsB    |
| rplK   | pp | groS    |
| rplK   | pp | rpsP    |
| rplK   | pp | rplL    |
| rplK   | pp | nuoI    |
| rplK   | pp | rpsD    |
| rplK   | pp | rpsI    |
| rplK   | pp | prs     |
| MT0352 | pp | etfB    |
| MT0352 | pp | etfA    |
| MT0352 | pp | ppa     |
| fabG   | pp | fadA6   |
| fabG   | pp | cysS    |
| fabG   | pp | acpM    |
| rplE   | pp | rpsP    |
| rplE   | pp | rpsA    |
| rplE   | pp | fir     |
| rplE   | pp | rpsE    |
| rplE   | pp | gevT    |
| rplE   | pp | rpsI    |
| rplE   | pp | rplA    |
| rplE   | pp | groS    |
| rplE   | pp | atpA    |
| rplE   | pp | clpP2   |
| rplE   | pp | sucC    |
| rplE   | pp | rpsD    |
| rplE   | pp | gltA2   |
| rplE   | pp | ilvC    |
| rplE   | pp | pvrG    |
| rplE   | pp | aceE    |
| rplE   | pp | glyA1   |
| rplE   | pp | tsf     |
| rplE   | pp | gltX    |
| rplE   | pp | cysS    |
| rplE   | pp | rpsH    |
| rplE   | pp | rpsK    |
| rplE   | pp | Rv3417c |
| rplE   | pp | atpD    |
| rplE   | pp | atpB    |
| rplE   | pp | gpiI    |
| rplE   | pp | argS    |
| rplE   | pp | rpsM    |
| rplE   | pp | pdbB    |
| rplE   | pp | atpG    |
| rplE   | pp | gevH    |
| rplE   | pp | rpoA    |
| rplE   | pp | rpsB    |
| rplE   | pp | rplQ    |
| rplE   | pp | glnA1   |
| rplE   | pp | sucD    |
| rplE   | pp | prs     |
| rplE   | pp | ppa     |
| rplE   | pp | atpF    |
| slpP2  | pp | rpsK    |
| slpP2  | pp | gpiI    |
| slpP2  | pp | rpsD    |
| slpP2  | pp | fir     |
| slpP2  | pp | groS    |
| slpP2  | pp | gltX    |
| slpP2  | pp | Rv3417c |
| slpP2  | pp | tsf     |
| slpP2  | pp | ilvC    |
| slpP2  | pp | rplQ    |
| slpP2  | pp | rpoA    |
| slpP2  | pp | rpsB    |
| slpP2  | pp | rpsM    |
| rplC   | pp | rpsH    |
| rplC   | pp | atpB    |
| rplC   | pp | rpmB3   |
| rplC   | pp | tsf     |
| rplC   | pp | murD    |
| rplC   | pp | rpsB    |
| rplC   | pp | cysS    |
| rplC   | pp | ilvB    |

|      |    |         |
|------|----|---------|
| rplC | pp | gltX    |
| rplC | pp | stpD    |
| rplC | pp | rpsD    |
| rplC | pp | groS    |
| rplC | pp | stpA    |
| rplC | pp | glyA1   |
| rplC | pp | rplA    |
| rplC | pp | gpsI    |
| rplC | pp | fir     |
| rplC | pp | ahcY    |
| rplC | pp | rpsI    |
| rplC | pp | Rv3417c |
| rplC | pp | rpsK    |
| rplC | pp | metK    |
| rplC | pp | rpsS    |
| rplC | pp | rpsE    |
| rplC | pp | prs     |
| rplC | pp | rpsM    |
| rplC | pp | pvrG    |
| rplC | pp | rpsA    |
| rplC | pp | rplQ    |
| rplC | pp | ilvC    |
| rplC | pp | rplE    |
| rplC | pp | atpG    |
| rplC | pp | atpF    |
| rplC | pp | argF    |
| rplC | pp | ppa     |
| rplC | pp | gevH    |
| rplC | pp | argS    |
| rplC | pp | rpsQ    |
| rplC | pp | fumC    |
| rplC | pp | pdhB    |
| rplC | pp | rpoA    |
| rplC | pp | fadB    |
| rplC | pp | rpsP    |
| rplC | pp | rpsC    |
| rplC | pp | aceE    |
| rplA | pp | rpoB    |
| rplA | pp | rpsB    |
| rplA | pp | groS    |
| rplA | pp | pdhB    |
| rplA | pp | tsf     |
| rplA | pp | rplA    |
| rplA | pp | sepM    |
| rplA | pp | rplC    |
| rplA | pp | rplQ    |
| rplA | pp | rpsK    |
| rplA | pp | clpX    |
| rplA | pp | rpsM    |
| rplA | pp | rpsG    |
| rplA | pp | pvrG    |
| rplA | pp | gevP    |
| rplA | pp | rpsS    |
| rplA | pp | argS    |
| rplA | pp | rplE    |
| rplA | pp | mdh     |
| rplA | pp | atpG    |
| rplA | pp | rpoC    |
| rplA | pp | atpF    |
| rplA | pp | fir     |
| rplA | pp | rpsP    |
| rplA | pp | rpoA    |
| rplA | pp | rpsH    |
| rplA | pp | fumC    |
| rplA | pp | ilvC    |
| rplA | pp | rpsL    |
| rplA | pp | rplI    |
| rplA | pp | Rv3417c |
| rplA | pp | rpsC    |
| rplA | pp | ilvB    |
| rplA | pp | rpsD    |
| rplA | pp | rplL    |
| rplA | pp | glyA1   |
| rplA | pp | prs     |
| rplA | pp | ahcY    |
| rplA | pp | atpB    |
| rplA | pp | rpsI    |
| rplA | pp | ilvH    |
| rplA | pp | rnf     |
| rplA | pp | rpsE    |
| rplA | pp | rpsQ    |
| rplA | pp | gpsI    |
| rplA | pp | glnA1   |
| rplA | pp | argF    |
| rplA | pp | cysS    |
| rplA | pp | rpsA    |
| rplA | pp | rpsI    |
| rplA | pp | atpA    |
| rplA | pp | gltX    |

|         |    |         |
|---------|----|---------|
| rplA    | pp | stpD    |
| rplA    | pp | fusA    |
| acpM    | pp | pdbB    |
| acpM    | pp | rpsP    |
| acpM    | pp | clpP2   |
| acpM    | pp | etfB    |
| acpM    | pp | gpsI    |
| acpM    | pp | etfA    |
| acpM    | pp | tsf     |
| acpM    | pp | rpsB    |
| acpM    | pp | rpsM    |
| acpM    | pp | nuoB    |
| acpM    | pp | nuoC    |
| acpM    | pp | groS    |
| acpM    | pp | nuoL    |
| acpM    | pp | Rv3417c |
| acpM    | pp | ahcY    |
| acpM    | pp | ppa     |
| acpM    | pp | nuoI    |
| acpM    | pp | rpoA    |
| acpM    | pp | gltX    |
| acpM    | pp | rplQ    |
| acpM    | pp | pdxS    |
| acpM    | pp | pdxT    |
| acpM    | pp | ilvC    |
| acpM    | pp | nuoH    |
| rpmB3   | pp | rplQ    |
| rpmB3   | pp | rpoA    |
| rpmB3   | pp | rpsD    |
| rpmB3   | pp | rpsK    |
| rpmB3   | pp | ilvC    |
| rpmB3   | pp | rpsM    |
| nuoK    | pp | nuoM    |
| nuoK    | pp | ppa     |
| nuoK    | pp | nuoL    |
| nuoK    | pp | nuoN    |
| nuoH    | pp | nuoK    |
| nuoH    | pp | nuoM    |
| nuoH    | pp | nuoL    |
| nuoH    | pp | nuoI    |
| nuoH    | pp | rpsD    |
| nuoH    | pp | ppa     |
| nuoH    | pp | nuoN    |
| nuoI    | pp | nuoL    |
| nuoI    | pp | nuoM    |
| nuoI    | pp | rpsK    |
| nuoI    | pp | cysS    |
| nuoI    | pp | nuoN    |
| nuoI    | pp | nuoK    |
| nuoI    | pp | ppa     |
| nuoN    | pp | ppa     |
| MT2338  | pp | etfA    |
| MT2338  | pp | etfB    |
| nuoL    | pp | rpsD    |
| nuoL    | pp | nuoM    |
| nuoL    | pp | rpoA    |
| nuoL    | pp | nuoN    |
| nuoL    | pp | ppa     |
| nuoM    | pp | nuoN    |
| Rv3417c | pp | rpsM    |
| Rv3417c | pp | groS    |
| Rv3417c | pp | rpsK    |
| Rv3417c | pp | rpoA    |
| Rv3417c | pp | ppa     |
| Rv3417c | pp | rplQ    |
| Rv3417c | pp | cysS    |
| Rv3417c | pp | rpsI    |
| Rv3417c | pp | rpsD    |
| scd2    | pp | argH    |
| scd2    | pp | sucC    |
| scd2    | pp | ndh     |
| scd2    | pp | gabD2   |
| scd2    | pp | gdh     |
| scd2    | pp | sel     |
| scd2    | pp | rplE    |
| scd2    | pp | acn     |
| scd2    | pp | ppiA    |
| scd2    | pp | sucD    |
| scd2    | pp | kgd     |
| scd2    | pp | dlaT    |
| scd2    | pp | gltA2   |
| dnaN    | pp | rpsL    |
| dnaN    | pp | argJ    |
| dnaN    | pp | pyrG    |
| dnaN    | pp | murE    |
| dnaN    | pp | rpoA    |
| dnaN    | pp | glnA1   |
| dnaN    | pp | gltX    |
| dnaN    | pp | kgd     |

|      |    |         |
|------|----|---------|
| dnaN | pp | Rv3417c |
| dnaN | pp | rplL    |
| dnaN | pp | rplA    |
| dnaN | pp | gnd2    |
| dnaN | pp | murF    |
| dnaN | pp | atpD    |
| dnaN | pp | murD    |
| dnaN | pp | hsp65   |
| dnaN | pp | fusA    |
| dnaN | pp | tuf     |
| dnaN | pp | glyA1   |
| dnaN | pp | atpG    |
| dnaN | pp | tsf     |
| dnaN | pp | murG    |
| dnaN | pp | ilvD    |
| dnaN | pp | gpsI    |
| dnaN | pp | nuoL    |
| dnaN | pp | fumC    |
| dnaN | pp | rpsI    |
| dnaN | pp | fir     |
| dnaN | pp | rpoC    |
| dnaN | pp | ppa     |
| dnaN | pp | rpsG    |
| dnaN | pp | nuoM    |
| dnaN | pp | rpoB    |
| dnaN | pp | dnaK    |
| dnaK | pp | atpF    |
| dnaK | pp | murE    |
| dnaK | pp | icl     |
| dnaK | pp | devR    |
| dnaK | pp | rpsG    |
| dnaK | pp | dnaJ1   |
| dnaK | pp | prs     |
| dnaK | pp | argS    |
| dnaK | pp | rplC    |
| dnaK | pp | rpsQ    |
| dnaK | pp | rpsI    |
| dnaK | pp | gltX    |
| dnaK | pp | acpM    |
| dnaK | pp | atpG    |
| dnaK | pp | argG    |
| dnaK | pp | rplK    |
| dnaK | pp | rpsL    |
| dnaK | pp | nuoC    |
| dnaK | pp | clpX    |
| dnaK | pp | hsp65   |
| dnaK | pp | argF    |
| dnaK | pp | gltA2   |
| dnaK | pp | rpsE    |
| dnaK | pp | rpsB    |
| dnaK | pp | fumC    |
| dnaK | pp | rplA    |
| dnaK | pp | dhaT    |
| dnaK | pp | acr     |
| dnaK | pp | nuoA    |
| dnaK | pp | gltA    |
| dnaK | pp | rpoC    |
| dnaK | pp | rplQ    |
| dnaK | pp | mdh     |
| dnaK | pp | rplE    |
| dnaK | pp | acn     |
| dnaK | pp | nuoB    |
| dnaK | pp | MT3777  |
| dnaK | pp | fla     |
| dnaK | pp | clpP2   |
| dnaK | pp | atpA    |
| dnaK | pp | nuoD    |
| dnaK | pp | Rv1488  |
| dnaK | pp | etfB    |
| dnaK | pp | fusA    |
| dnaK | pp | glyA1   |
| dnaK | pp | sucD    |
| dnaK | pp | hpd     |
| dnaK | pp | rpoA    |
| dnaK | pp | fadE25  |
| dnaK | pp | rpsC    |
| dnaK | pp | ndsS    |
| dnaK | pp | groS    |
| dnaK | pp | pyrG    |
| dnaK | pp | cysS    |
| dnaK | pp | gpsI    |
| dnaK | pp | murG    |
| dnaK | pp | rpsM    |
| dnaK | pp | glnA1   |
| dnaK | pp | rpsK    |
| dnaK | pp | gecP    |
| dnaK | pp | metK    |
| dnaK | pp | rpsS    |
| dnaK | pp | atpC    |

|        |    |         |
|--------|----|---------|
| dnaK   | pp | gpmA    |
| dnaK   | pp | pdhC    |
| dnaK   | pp | tsf     |
| dnaK   | pp | grpE    |
| dnaK   | pp | rpsH    |
| dnaK   | pp | pdhB    |
| dnaK   | pp | atpD    |
| dnaK   | pp | sucC    |
| dnaK   | pp | kgd     |
| dnaK   | pp | ahcY    |
| dnaK   | pp | ppa     |
| dnaK   | pp | ilvB    |
| dnaK   | pp | rpII    |
| dnaK   | pp | etfA    |
| dnaK   | pp | rpsD    |
| dnaK   | pp | rpsA    |
| dnaK   | pp | nuoH    |
| dnaK   | pp | rpII    |
| dnaK   | pp | ilvC    |
| dnaK   | pp | gevT    |
| dnaK   | pp | mirA    |
| dnaK   | pp | nuoI    |
| dnaK   | pp | gnd2    |
| dnaK   | pp | tal     |
| dnaK   | pp | rpsI    |
| dnaK   | pp | rpsP    |
| dnaK   | pp | fir     |
| dnaK   | pp | rpoB    |
| dnaK   | pp | rplA    |
| dnaK   | pp | Rv3417c |
| dnaK   | pp | tuf     |
| MT0262 | pp | atpA    |
| MT0262 | pp | qcrB    |
| MT0262 | pp | acn     |
| MT0262 | pp | sucC    |
| MT0262 | pp | gltA2   |
| MT0262 | pp | argH    |
| MT0262 | pp | kgd     |
| MT0262 | pp | sucD    |
| MT0262 | pp | dlaT    |
| MT0262 | pp | mdh     |
| MT0262 | pp | gabD2   |
| MT0262 | pp | fumC    |
| glcB   | pp | pdhC    |
| glcB   | pp | gevT    |
| glcB   | pp | acr     |
| glcB   | pp | fadA6   |
| glcB   | pp | ppa     |
| fadD2  | pp | plk13   |
| cysS   | pp | ppa     |
| devR   | pp | MT3777  |
| lnd    | pp | dlaT    |
| lnd    | pp | glx     |
| lnd    | pp | rpsB    |
| lnd    | pp | tsf     |
| lnd    | pp | etfA    |
| lnd    | pp | acn     |
| lnd    | pp | gevH    |
| lnd    | pp | gpmA    |
| lnd    | pp | atpA    |
| lnd    | pp | kgd     |
| lnd    | pp | fasA    |
| lnd    | pp | gltA2   |
| lnd    | pp | gpiI    |
| lnd    | pp | sucC    |
| lnd    | pp | sucD    |
| lnd    | pp | tuf     |
| lnd    | pp | rpIK    |
| lnd    | pp | aceE    |
| lnd    | pp | argG    |
| lnd    | pp | pyrG    |
| lnd    | pp | rpIC    |
| lnd    | pp | fir     |
| lnd    | pp | fumC    |
| lnd    | pp | atpD    |
| lnd    | pp | icl     |
| lnd    | pp | gevT    |
| lnd    | pp | aspM    |
| lnd    | pp | gevP    |
| lnd    | pp | pdhB    |
| lnd    | pp | glvA1   |
| lnd    | pp | ilvB    |
| lnd    | pp | Rv3417c |
| lnd    | pp | ilvC    |
| lnd    | pp | upaA    |
| lnd    | pp | atpG    |
| lnd    | pp | rpII    |
| lnd    | pp | mdh     |
| lnd    | pp | pdhC    |

|        |    |         |
|--------|----|---------|
| lpd    | pp | glnA1   |
| lpd    | pp | rpsE    |
| ag84   | pp | murE    |
| ag84   | pp | murD    |
| ag84   | pp | etfA    |
| ag84   | pp | murG    |
| MT0156 | pp | icl     |
| MT0156 | pp | MT3496  |
| murF   | pp | nuoA    |
| murF   | pp | murE    |
| murF   | pp | ilvH    |
| dlaT   | pp | ilvB    |
| dlaT   | pp | nuoD    |
| dlaT   | pp | nuoI    |
| dlaT   | pp | gpsI    |
| dlaT   | pp | aceE    |
| dlaT   | pp | pdhB    |
| dlaT   | pp | nuoC    |
| dlaT   | pp | pdhC    |
| dlaT   | pp | nuoH    |
| dlaT   | pp | ppa     |
| dlaT   | pp | nuoB    |
| dlaT   | pp | acpM    |
| dlaT   | pp | etfA    |
| dlaT   | pp | fadA6   |
| dlaT   | pp | nuoL    |
| dlaT   | pp | clpX    |
| gnd2   | pp | mdh     |
| gnd2   | pp | tpiA    |
| gnd2   | pp | tal     |
| gnd2   | pp | ppa     |
| gnd2   | pp | gpsI    |
| murG   | pp | murE    |
| murG   | pp | clpX    |
| murG   | pp | nuoL    |
| murG   | pp | ahcY    |
| murG   | pp | pdhB    |
| murG   | pp | rplQ    |
| murG   | pp | murD    |
| murG   | pp | mraY    |
| murG   | pp | tsf     |
| murG   | pp | clpP2   |
| murG   | pp | murF    |
| tal    | pp | glnA1   |
| tal    | pp | murE    |
| tal    | pp | argF    |
| tal    | pp | sen     |
| tal    | pp | aceE    |
| tal    | pp | ilvC    |
| tal    | pp | pdhB    |
| tal    | pp | argH    |
| pyrG   | pp | sevT    |
| pyrG   | pp | rpsD    |
| pyrG   | pp | sevP    |
| pyrG   | pp | rpsB    |
| pyrG   | pp | rpsP    |
| pyrG   | pp | clpX    |
| pyrG   | pp | shX     |
| pyrG   | pp | MT3777  |
| pyrG   | pp | glnA1   |
| pyrG   | pp | cysS    |
| pyrG   | pp | sdh     |
| pyrG   | pp | clpP2   |
| pyrG   | pp | ahcY    |
| pyrG   | pp | pdsS    |
| pyrG   | pp | Rv3417c |
| pyrG   | pp | fir     |
| pyrG   | pp | ppa     |
| pyrG   | pp | murG    |
| pyrG   | pp | rpsI    |
| pyrG   | pp | clpI7   |
| pyrG   | pp | ilvC    |
| pyrG   | pp | ilvB    |
| pyrG   | pp | gpsI    |
| pyrG   | pp | acpM    |
| pyrG   | pp | aceE    |
| pyrG   | pp | rpsK    |
| pyrG   | pp | rpoA    |
| pyrG   | pp | tsf     |
| pyrG   | pp | rpsM    |
| pyrG   | pp | rplQ    |
| fadD8  | pp | pls13   |
| murD   | pp | acpM    |
| murD   | pp | ilvC    |
| murD   | pp | mraY    |
| murD   | pp | tsf     |
| murD   | pp | rpsB    |
| murD   | pp | rpsK    |
| murD   | pp | murF    |



|      |    |       |
|------|----|-------|
| murD | pp | rpsM  |
| murD | pp | glnA1 |
| murD | pp | gltX  |
| murD | pp | rplQ  |
| murD | pp | murE  |
| rplQ | pp | rpsK  |
| rplQ | pp | rpsM  |
| rplQ | pp | rpsD  |
| rplQ | pp | cysS  |
| rplQ | pp | rpoA  |
| murE | pp | rpsD  |
| murE | pp | rpoA  |
| murE | pp | nuoM  |
| murE | pp | ilvH  |
| murE | pp | rplQ  |
| murE | pp | nuoN  |
| murE | pp | nuoK  |
| murE | pp | ilvB  |
| murE | pp | nuoL  |
| murE | pp | nuoC  |
| murE | pp | nuoA  |
| murE | pp | nuoI  |
| murE | pp | nuoH  |
| murE | pp | nuoD  |
| murE | pp | fir   |
| murE | pp | clpP2 |
| murE | pp | clpX  |
| murE | pp | pdhB  |
| murE | pp | nuoB  |
