# Supplementary material
Source: PubMed Central journal article supplement (PMC4256489)
Supplement: supp_M114.041962_mcp.M114.041962-10.pdf [file supp_M114.041962_mcp.M114.041962-10.pdf]

**Supplementary Table 8. MCODE analysis of acetylated proteins and their interacting proteins.**

| Cluster 1    |              |           |                                                                                                                                | Rank | Score  | Acetylated protein | nodes | Edges |
|--------------|--------------|-----------|--------------------------------------------------------------------------------------------------------------------------------|------|--------|--------------------|-------|-------|
|              |              |           |                                                                                                                                | 1    | 21.267 | 28                 | 45    | 957   |
| Proteins_ID  | Synonym      | Gene name | Description                                                                                                                    |      |        |                    |       |       |
| gi 148660457 | mra:MRA_0691 | rpsL      | 30S ribosomal protein S12                                                                                                      |      |        |                    |       |       |
| gi 148661496 | mra:MRA_1708 | pyrG      | UTP--ammonia ligase, CTP synthetase, CTP synthase                                                                              |      |        |                    |       |       |
| gi 148662852 | mra:MRA_3031 | ilvC      | Ketol-acid reductoisomerase, Alpha-keto-beta-hydroxylacil reductoisomerase, Acetohydroxy-acid isomeroreductase                 |      |        |                    |       |       |
| gi 148661097 | mra:MRA_1317 | atpG      | F-ATPase gamma subunit, ATP synthase gamma chain, ATP synthase F1 sector gamma subunit                                         |      |        |                    |       |       |
| gi 148662625 | mra:MRA_2807 | gpsI      | Polyribonucleotide nucleotidyltransferase, Polynucleotide phosphorylase                                                        |      |        |                    |       |       |
| gi 148660441 | mra:MRA_0676 | rpoB      | DNA-directed RNA polymerase subunit beta                                                                                       |      |        |                    |       |       |
| gi 148662842 | mra:MRA_3021 | gltX      | Glutamyl-tRNA synthetase, Glutamate--tRNA ligase                                                                               |      |        |                    |       |       |
| gi 148660116 | mra:MRA_0359 | dnaK      | Heat shock protein 70, Heat shock 70 kDa protein, HSP70, Chaperone protein dnaK                                                |      |        |                    |       |       |
| gi 148663323 | mra:MRA_3499 | rpsD      | 30S ribosomal protein S4                                                                                                       |      |        |                    |       |       |
| gi 148663321 | mra:MRA_3497 | rplQ      | 50S ribosomal protein L17                                                                                                      |      |        |                    |       |       |
| gi 148661098 | mra:MRA_1318 | atpD      | F-ATPase subunit beta, ATP synthase subunit beta, ATP synthase F1 sector subunit beta                                          |      |        |                    |       |       |
| gi 148660480 | mra:MRA_0713 | rpsS      | 30S ribosomal protein S19                                                                                                      |      |        |                    |       |       |
| gi 148663444 | mra:MRA_3619 | cysS      | Cysteinyl-tRNA synthetase 1, Cysteinyl-tRNA synthetase, Cysteine--tRNA ligase 1, Cysteine--tRNA ligase                         |      |        |                    |       |       |
| gi 148663325 | mra:MRA_3501 | rpsM      | 30S ribosomal protein S13                                                                                                      |      |        |                    |       |       |
| gi 148663491 | mra:MRA_3664 | ppa       | Pyrophosphate phospho-hydrolase, Inorganic pyrophosphatase                                                                     |      |        |                    |       |       |
| gi 148660475 | mra:MRA_0708 | rpsJ      | 30S ribosomal protein S10                                                                                                      |      |        |                    |       |       |
| gi 148662733 | mra:MRA_2914 | tsf       | Elongation factor Ts                                                                                                           |      |        |                    |       |       |
| gi 148661080 | mra:MRA_1300 | argS      | Arginyl-tRNA synthetase, Arginine--tRNA ligase                                                                                 |      |        |                    |       |       |
| gi 148660415 | mra:MRA_0652 | rplA      | 50S ribosomal protein L1                                                                                                       |      |        |                    |       |       |
| gi 148661092 | mra:MRA_1312 | atpB      | F-ATPase subunit 6, ATP synthase subunit a, ATP synthase F0 sector subunit a                                                   |      |        |                    |       |       |
| gi 148661096 | mra:MRA_1316 | atpA      | F-ATPase subunit alpha, ATP synthase subunit alpha, ATP synthase F1 sector subunit alpha                                       |      |        |                    |       |       |
| gi 148660879 | mra:MRA_1104 | glyA1     | Serine hydroxymethyltransferase 1, Serine hydroxymethyltransferase                                                             |      |        |                    |       |       |
| gi 148662726 | mra:MRA_2907 | fir       | Ribosome-releasing factor, Ribosome-recycling factor                                                                           |      |        |                    |       |       |
| gi 148660426 | mra:MRA_0663 | rplL      | 50S ribosomal protein L7/L12                                                                                                   |      |        |                    |       |       |
| gi 148660799 | mra:MRA_1025 | prs       | Ribose-phosphate pyrophosphokinase, Phosphoribosyl pyrophosphate synthetase                                                    |      |        |                    |       |       |
| gi 148660442 | mra:MRA_0677 | rpoC      | Transcriptase subunit beta, RNA polymerase subunit beta, DNA-directed RNA polymerase subunit beta, DNA-directed RNA polymerase |      |        |                    |       |       |
| gi 148660485 | mra:MRA_0718 | rpsQ      | 30S ribosomal protein S17                                                                                                      |      |        |                    |       |       |
| gi 148663322 | mra:MRA_3498 | rpoA      | Transcriptase subunit alpha, RNA polymerase subunit alpha, DNA-directed RNA polymerase subunit alpha                           |      |        |                    |       |       |
| gi 148660459 | mra:MRA_0693 | fusA      | Elongation factor G                                                                                                            |      |        |                    |       |       |
| gi 148660460 | mra:MRA_0694 | tuf       | Elongation factor Tu                                                                                                           |      |        |                    |       |       |
| gi 148660482 | mra:MRA_0715 | rpsC      | 30S ribosomal protein S3                                                                                                       |      |        |                    |       |       |
| gi 148660205 | mra:MRA_0445 | hsp65     | molecular chaperone GroEL                                                                                                      |      |        |                    |       |       |
| gi 148660496 | mra:MRA_0729 | rpsE      | 30S ribosomal protein S5                                                                                                       |      |        |                    |       |       |
| gi 148663281 | mra:MRA_3457 | Rv3417c   | groEL protein 2, groEL protein 1, Protein Cpn60-1, Protein Cpn60 2, 60 kDa chaperonin 2, 60 kDa chaperonin 1                   |      |        |                    |       |       |
| gi 148663307 | mra:MRA_3483 | rpsI      | 30S ribosomal protein S9                                                                                                       |      |        |                    |       |       |
| gi 148660425 | mra:MRA_0662 | rplJ      | 50S ribosomal protein L10                                                                                                      |      |        |                    |       |       |
| gi 148660491 | mra:MRA_0724 | rplE      | 50S ribosomal protein L5                                                                                                       |      |        |                    |       |       |
| gi 148663324 | mra:MRA_3500 | rpsK      | 30S ribosomal protein S11                                                                                                      |      |        |                    |       |       |
| gi 148662734 | mra:MRA_2915 | rpsB      | 30S ribosomal protein S2                                                                                                       |      |        |                    |       |       |
| gi 148660476 | mra:MRA_0709 | rplC      | 50S ribosomal protein L3                                                                                                       |      |        |                    |       |       |
| gi 148660458 | mra:MRA_0692 | rpsG      | 30S ribosomal protein S7                                                                                                       |      |        |                    |       |       |
| gi 148662753 | mra:MRA_2934 | rpsP      | 30S ribosomal protein S16                                                                                                      |      |        |                    |       |       |

|              |              |      |                           |  |  |  |  |  |
|--------------|--------------|------|---------------------------|--|--|--|--|--|
| gi 148661425 | mra:MRA_1640 | rpsA | 30S ribosomal protein S1  |  |  |  |  |  |
| gi 148660493 | mra:MRA_0726 | rpsH | 30S ribosomal protein S8  |  |  |  |  |  |
| gi 148660414 | mra:MRA_0651 | rplK | 50S ribosomal protein L11 |  |  |  |  |  |

| Cluster 2    |              |           |                                                                                                                       | Rank | Score | Acetylated protein | nodes | Edges |
|--------------|--------------|-----------|-----------------------------------------------------------------------------------------------------------------------|------|-------|--------------------|-------|-------|
|              |              |           |                                                                                                                       | 2    | 4.077 | 9                  | 13    | 53    |
| Proteins_ID  | Synonym      | Gene name | Description                                                                                                           |      |       |                    |       |       |
| gi 148660731 | mra:MRA_0959 | sucD      | Succinyl-CoA synthetase subunit alpha, Succinyl-CoA ligase ADP-forming subunit alpha                                  |      |       |                    |       |       |
| gi 148662295 | mra:MRA_2486 | clpP2     | Endopeptidase Clp 2, ATP-dependent Clp protease proteolytic subunit 2, ATP-dependent Clp protease proteolytic subunit |      |       |                    |       |       |
| gi 148660884 | mra:MRA_1109 | fumC      | Fumarate hydratase class II, Fumarate hydratase                                                                       |      |       |                    |       |       |
| gi 148659953 | mra:MRA_0197 | ilvD      | Dihydroxy-acid dehydratase                                                                                            |      |       |                    |       |       |
| gi 148663282 | mra:MRA_3458 | groS      | groES protein, Protein Cpn10, BCG-A heat shock protein, 10 kDa chaperonin, 10 kDa antigen                             |      |       |                    |       |       |
| gi 148661094 | mra:MRA_1314 | atpF      | F-type ATPase subunit b, ATPase subunit I, ATP synthase subunit b, ATP synthase F(0) sector subunit b                 |      |       |                    |       |       |
| gi 148661452 | mra:MRA_1667 | argF      | Ornithine carbamoyltransferase                                                                                        |      |       |                    |       |       |
| gi 148661229 | mra:MRA_1446 | tpiA      | Triosephosphate isomerase, Triose-phosphate isomerase                                                                 |      |       |                    |       |       |
| gi 148660129 | mra:MRA_0372 | fba       | Fructose-bisphosphate aldolase Fba, Fructose-bisphosphate aldolase, Fructose-1,6-bisphosphate aldolase                |      |       |                    |       |       |
| gi 148662038 | mra:MRA_2237 | glnA1     | Glutamine synthetase 1, Glutamine synthetase, Glutamate--ammonia ligase 1                                             |      |       |                    |       |       |
| gi 148661183 | mra:MRA_1401 | metK      | S-adenosylmethionine synthetase, Methionine adenosyltransferase, MAT, AdoMet synthetase                               |      |       |                    |       |       |
| gi 148660117 | mra:MRA_0360 | grpE      | Protein grpE, HSP-70 cofactor                                                                                         |      |       |                    |       |       |
| gi 148660730 | mra:MRA_0958 | sucC      | Succinyl-CoA synthetase subunit beta, Succinyl-CoA ligase ADP-forming subunit beta                                    |      |       |                    |       |       |

| Cluster 3    |              |           |                                                                                                                                          | Rank | Score | Acetylated protein | nodes | Edges |
|--------------|--------------|-----------|------------------------------------------------------------------------------------------------------------------------------------------|------|-------|--------------------|-------|-------|
|              |              |           |                                                                                                                                          | 3    | 3.364 | 4                  | 11    | 37    |
| Proteins_ID  | Synonym      | Gene name | Description                                                                                                                              |      |       |                    |       |       |
| gi 148663010 | mra:MRA_3188 | nuoK      | NDH-1 subunit K, NADH-quinone oxidoreductase subunit K, NADH dehydrogenase I subunit K                                                   |      |       |                    |       |       |
| gi 148663011 | mra:MRA_3189 | nuoL      | NDH-1 subunit L, NADH-quinone oxidoreductase subunit L, NADH dehydrogenase subunit L, NADH dehydrogenase I subunit L                     |      |       |                    |       |       |
| gi 148663001 | mra:MRA_3179 | nuoB      | NDH-1 subunit B, NADH-quinone oxidoreductase subunit B, NADH dehydrogenase I subunit B                                                   |      |       |                    |       |       |
| gi 148662032 | mra:MRA_2231 | dlaT      | Dihydrolipoamide acyltransferase DlaT                                                                                                    |      |       |                    |       |       |
| gi 148661974 | mra:MRA_2173 | murE      | UDP-N-acetylmuramyl-tripeptide synthetase, UDP-MurNAc-tripeptide synthetase, Meso-diaminopimelate-adding enzyme, Meso-A2pm-adding enzyme |      |       |                    |       |       |
| gi 148663012 | mra:MRA_3190 | nuoM      | NDH-1 subunit M, NADH-quinone oxidoreductase subunit M, NADH dehydrogenase subunit M, NADH dehydrogenase I subunit M                     |      |       |                    |       |       |
| gi 148663013 | mra:MRA_3191 | nuoN      | NDH-1 subunit N, NADH-quinone oxidoreductase subunit N, NADH dehydrogenase subunit N, NADH dehydrogenase I subunit N                     |      |       |                    |       |       |
| gi 148662331 | mra:MRA_2521 | pdhC      | branched-chain alpha-keto acid dehydrogenase subunit E2                                                                                  |      |       |                    |       |       |
| gi 148663002 | mra:MRA_3180 | nuoC      | NDH-1 subunit C, NADH-quinone oxidoreductase subunit C, NADH dehydrogenase I subunit C                                                   |      |       |                    |       |       |
| gi 148662062 | mra:MRA_2261 | aceE      | Pyruvate dehydrogenase subunit E1, Pyruvate dehydrogenase E1 component                                                                   |      |       |                    |       |       |
| gi 148663007 | mra:MRA_3185 | nuoH      | NDH-1 subunit H, NADH-quinone oxidoreductase subunit H, NADH dehydrogenase I subunit H                                                   |      |       |                    |       |       |

| Cluster 4    |              |           |                                                          | Rank | Score | Acetylated protein | nodes | Edges |
|--------------|--------------|-----------|----------------------------------------------------------|------|-------|--------------------|-------|-------|
|              |              |           |                                                          | 4    | 2.444 | 6                  | 9     | 22    |
| Proteins_ID  | Synonym      | Gene name | Description                                              |      |       |                    |       |       |
| gi 148662332 | mra:MRA_2522 | pdhB      | 2-oxoisovalerate dehydrogenase E1 component subunit beta |      |       |                    |       |       |
| gi 148662854 | mra:MRA_3033 | ilvB      | Acetolactate synthase, Acetohydroxy-acid synthase, ALS   |      |       |                    |       |       |

|              |              |       |                                                                                               |  |  |  |  |
|--------------|--------------|-------|-----------------------------------------------------------------------------------------------|--|--|--|--|
| gi 148660256 | mra:MRA_0496 | gpmA  | phosphoglyceromutase                                                                          |  |  |  |  |
| gi 148662065 | mra:MRA_2264 | acpM  | Meromycolate extension acyl carrier protein AcpM, Meromycolate extension acyl carrier protein |  |  |  |  |
| gi 148661027 | mra:MRA_1249 | mdh   | Malate dehydrogenase                                                                          |  |  |  |  |
| gi 148661268 | mra:MRA_1485 | acn   | Aconitate hydratase                                                                           |  |  |  |  |
| gi 148660674 | mra:MRA_0904 | gltA2 | Citrate synthase 1, Citrate synthase                                                          |  |  |  |  |
| gi 148660228 | mra:MRA_0468 | lpd   | Dihydrolipoyl dehydrogenase, Dihydrolipoamide dehydrogenase                                   |  |  |  |  |
| gi 148662292 | mra:MRA_2483 | clpX  | ATP-dependent protease ATP-binding subunit ClpX                                               |  |  |  |  |

| <b>Cluster 5</b>   |                |                  |                                                       |
|--------------------|----------------|------------------|-------------------------------------------------------|
| <b>Proteins_ID</b> | <b>Synonym</b> | <b>Gene name</b> | <b>Description</b>                                    |
| gi 148661845       | mra:MRA_2046   | acr              | antigen Hsp20                                         |
| gi 148663282       | mra:MRA_3458   | gros             | co-chaperonin GroES                                   |
| gi 148660116       | mra:MRA_0359   | dnak             | molecular chaperone DnaK                              |
| gi 148661530       | mra:MRA_1742   | MT1773           | hypothetical protein                                  |
| gi 148662292       | mra:MRA_2483   | clpX             | ATP-dependent protease ATP-binding subunit ClpX       |
| gi 148660117       | mra:MRA_0360   | grpE             | heat shock protein GrpE                               |
| gi 148662295       | mra:MRA_2486   | clpP2            | ATP-dependent Clp protease proteolytic subunit        |
| gi 148663007       | mra:MRA_3185   | nuoH             | NADH dehydrogenase subunit H                          |
| gi 148662987       | mra:MRA_3165   | devR             | two component transcriptional regulatory protein DevR |
| gi 148660674       | mra:MRA_0904   | gltA2            | type II citrate synthase                              |
| gi 148660205       | mra:MRA_0445   | hsp65            | molecular chaperone GroEL                             |
| gi 148663539       | mra:MRA_3711   | MT3777           | Crp/Fnr family transcriptional regulator              |
| gi 148661425       | mra:MRA_1640   | rpsA             | 30S ribosomal protein S1                              |
| gi 148661431       | mra:MRA_1646   | TB15.3           | hypothetical protein                                  |
| gi 148663281       | mra:MRA_3457   | Rv3417c          | molecular chaperone GroEL                             |
| gi 148661643       | mra:MRA_1848   | glcB             | malate synthase G                                     |
| gi 148660118       | mra:MRA_0361   | dnaJ1            | molecular chaperone DnaJ                              |
