# Supplementary material
Source: PubMed Central journal article supplement (PMC4256489)
Supplement: supp_M114.041962_mcp.M114.041962-11.pdf [file supp_M114.041962_mcp.M114.041962-11.pdf]

## Supplemental Table 9. The secretory proteins identified in *Mycobacterium tuberculosis*

### H37Ra.

| Gene ID      | Locus tag in <i>M. tuberculosis</i> H37Ra | Gene  | Description                                             | Locus tag in <i>M. tuberculosis</i> H37Rv | Gene   | Locus tag in <i>M. tuberculosis</i> H37Rv (reference) Culture filter proteins | Locus tag in <i>M. tuberculosis</i> H37Rv (reference) antigens |
|--------------|-------------------------------------------|-------|---------------------------------------------------------|-------------------------------------------|--------|-------------------------------------------------------------------------------|----------------------------------------------------------------|
| gi 148662038 | MRA_2237                                  | glnA1 | glutamine synthetase                                    | Rv2220                                    | glnA1  | Rv2220 (1)                                                                    | Rv2220 (2)                                                     |
| gi 148660661 | MRA_0891                                  | serC  | phosphoserine aminotransferase                          | Rv0884c                                   | serC   | Rv0884c (3)                                                                   |                                                                |
| gi 148661098 | MRA_1318                                  | atpD  | ATP synthase F <sub>0</sub> F <sub>1</sub> subunit beta | Rv1310                                    | atpD   | Rv1310 (3)                                                                    |                                                                |
| gi 148659975 | MRA_0219                                  | pckA  | phosphoenolpyruvate carboxykinase                       | Rv0211                                    | pckA   | Rv0211 (3)                                                                    |                                                                |
| gi 148663111 | MRA_3289                                  | sahH  | S-adenosyl-L-homocysteine hydrolase                     | Rv3248c                                   | sahH   | Rv3248c (3)                                                                   | Rv3248c (4)                                                    |
| gi 148660116 | MRA_0359                                  | dnaK  | molecular chaperone DnaK                                | Rv0350                                    | dnaK   | Rv0350 (3)                                                                    | Rv0350 (5)                                                     |
| gi 148660205 | MRA_0445                                  | groEL | molecular chaperone GroEL                               | Rv0440                                    | groEL2 | Rv0440 (1)                                                                    | Rv0440 (6)                                                     |
| gi 148661845 | MRA_2046                                  | hspX  | antigen Hsp20                                           | Rv2031c                                   | hspX   | Rv2031c (7)                                                                   | Rv2031c (8)                                                    |
| gi 148663282 | MRA_3458                                  | groES | co-chaperonin GroES                                     | Rv3418c                                   | groES  | Rv3418c (3)                                                                   | Rv3418c (6)                                                    |
| gi 148660529 | MRA_0762                                  | mmsA  | MmsA                                                    | Rv0753c                                   | mmsA   |                                                                               | Rv0753c (4)                                                    |
| gi 148659759 | MRA_0002                                  | dnaN  | DNA polymerase III subunit beta                         | Rv0002                                    | dnaN   | Rv0002 (3)                                                                    |                                                                |
| gi 148662881 | MRA_3060                                  | fixA  | electron transfer flavoprotein subunit beta             | Rv3029c                                   | fixA   | Rv3029c (9)                                                                   |                                                                |
| gi 148660009 | MRA_0253                                  | fadE5 | acyl-CoA dehydrogenase                                  | Rv0244c                                   | fadE5  | Rv0244c (3)                                                                   |                                                                |
| gi 148660036 | MRA_0279                                  | fadE6 | acyl-CoA dehydrogenase                                  | Rv0271c                                   | fadE6  |                                                                               | Rv0271c (10)                                                   |
| gi 148660636 | MRA_0867                                  | fadA  | acetyl-CoA acetyltransferase                            | Rv0859                                    | fadA   |                                                                               | Rv0859 (10)                                                    |
| gi 148661112 | MRA_1331                                  | fadA4 | acetyl-CoA acetyltransferase                            | Rv1323                                    | fadA4  | Rv1323 (3)                                                                    |                                                                |
| gi 148660129 | MRA_0372                                  | fba   | fructose-bisphosphate aldolase                          | Rv0363c                                   | fba    | Rv0363c (3)                                                                   | Rv0363c (4)                                                    |
| gi 148661643 | MRA_1848                                  | glcB  | malate synthase G                                       | Rv1837c                                   | glcB   | Rv1837c (3)                                                                   | Rv1837c (11)                                                   |
| gi 148660007 | MRA_0251                                  | fabG  | 3-ketoacyl-ACP reductase                                | Rv0242c                                   | fabG   | Rv0242c (3)                                                                   | Rv0242c (4)                                                    |
| gi 148661276 | MRA_1493                                  | fabG1 | 3-oxoacyl-ACP reductase                                 | Rv1483                                    | fabG1  |                                                                               | Rv1483 (10)                                                    |
| gi 148660908 | MRA_1131                                  | gnd2  | 6-phosphogluconate dehydrogenase                        | Rv1122                                    | gnd2   | Rv1122 (9)                                                                    |                                                                |
| gi 148661240 | MRA_1457                                  | tal   | transaldolase                                           | Rv1448c                                   | tal    | Rv1448c (3)                                                                   | Rv1448c (4)                                                    |
| gi 148663491 | MRA_3664                                  | ppa   | inorganic pyrophosphatase                               | Rv3628                                    | ppa    | Rv3628 (9)                                                                    |                                                                |
| gi 148663668 | MRA_3840                                  | pks13 | polyketide synthase                                     | Rv3800c                                   | pks13  |                                                                               | Rv3800c (4)                                                    |
| gi 148660460 | MRA_0694                                  | tuf   | elongation factor Tu                                    | Rv0685                                    | tuf    | Rv0685 (1)                                                                    |                                                                |
| gi 148660799 | MRA_1025                                  | prsA  | ribose-phosphate pyrophosphokinase                      | Rv1017c                                   | prsA   | Rv1017c (9)                                                                   | Rv1017c (10)                                                   |
| gi 148660228 | MRA_0468                                  | lpd   | dihydrolipoamide dehydrogenase                          | Rv0462                                    | lpd    | Rv0462 (3)                                                                    | Rv0462 (4)                                                     |

|              |           |       |                                                                            |         |        |             |              |
|--------------|-----------|-------|----------------------------------------------------------------------------|---------|--------|-------------|--------------|
| gi 148662062 | MRA_2261  | aceE  | pyruvate dehydrogenase subunit E1                                          | Rv2241  | aceE   | Rv2241 (3)  |              |
| gi 148660426 | MRA_0663  | rplL  | 50S ribosomal protein L7/L12                                               | Rv0652  | rplL   | Rv0652 (9)  | Rv0652 (12)  |
| gi 148660475 | MRA_0708  | rpsJ  | 30S ribosomal protein S10                                                  | Rv0700  | rpsJ   |             | Rv0700 (11)  |
| gi 148662726 | MRA_2907  | frr   | ribosome recycling factor                                                  | Rv2882c | frr    | Rv2882c (7) | Rv2882c (4)  |
| gi 148662065 | MRA_2264  | acpP  | acyl carrier protein                                                       | Rv2244  | acpM   | Rv2244 (9)  | Rv2244 (4)   |
| gi 148659826 | MRA_0068  | icd2  | isocitrate dehydrogenase (NADP) Icd2                                       | Rv0066c | icd2   | Rv0066c(9)  | Rv0066c (13) |
| gi 148660884 | MRA_1109  | fumC  | fumarate hydratase                                                         | Rv1098c | fumC   | Rv1098c (3) |              |
| gi 148660731 | MRA_0959  | sucD  | succinyl-CoA synthetase subunit alpha                                      | Rv0952  | sucD   | Rv0952 (9)  |              |
| gi 148661268 | MRA_1485  | acn   | aconitate hydratase                                                        | Rv1475c | can    | Rv1475c (3) | Rv1475c (4)  |
| gi 148661113 | MRA_1332  | -     | thioredoxin-related protein                                                | Rv1324  | -      |             | Rv1324 (4)   |
| gi 148663109 | MRA_3287  | mtrA  | two component sensory transduction transcriptional regulatory protein MtrA | Rv3246c | mtrA   |             | Rv3246c (14) |
| gi 148661281 | MRA_1497  | -     | hypothetical protein                                                       | Rv1488  | -      | Rv1488 (9)  |              |
| gi 148661431 | MRA_1646  | -     | hypothetical protein                                                       | Rv1636  | TB15.3 | Rv1636 (7)  | Rv1636 (15)  |
| gi 148661633 | MRA_1839  | cfp17 | hypothetical protein                                                       | Rv1827  | cfp17  | Rv1827 (3)  | Rv1827 (16)  |
| gi 148661955 | MRA_2154  | -     | hypothetical protein                                                       | Rv2140c | TB18.6 | Rv2140c (3) | Rv2140c (17) |
| gi 148661961 | MRA_2160  | wag31 | hypothetical protein                                                       | Rv2145c | wag31  |             | Rv2145c (18) |
| gi 148663251 | MRA_3428A | -     | hypothetical protein                                                       | Rv3389c | -      | Rv3389c (9) |              |
| gi 148663717 | MRA_3889  | -     | hypothetical protein                                                       | Rv3849  | -      | Rv3849 (3)  |              |

## References

- Rosenkrands, I., King, A., Weldingh, K., Moniatte, M., Moertz, E., and Andersen, P. (2000) Towards the proteome of *Mycobacterium tuberculosis*. *Electrophoresis* 21, 3740-3756
- Tullius, M. V., Harth, G., and Horwitz, M. A. (2003) Glutamine synthetase GlnA1 is essential for growth of *Mycobacterium tuberculosis* in human THP-1 macrophages and guinea pigs. *Infect. Immun.* 71, 3927-3936
- Malen, H., Berven, F. S., Fladmark, K. E., and Wiker, H. G. (2007) Comprehensive analysis of exported proteins from *Mycobacterium tuberculosis* H37Rv. *Proteomics* 7, 1702-1718
- Deenadayalan, A., Heaslip, D., Rajendiran, A. A., Velayudham, B. V., Frederick, S., Yang, H. L., Dobos, K., Belisle, J. T., and Raja, A. (2010) Immunoproteomic identification of human T cell antigens of *Mycobacterium tuberculosis* that differentiate healthy contacts from tuberculosis patients. *Mol. Cell. Proteomics* 9, 538-549
- Floto, R. A., MacAry, P. A., Boname, J. M., Mien, T. S., Kampmann, B., Hair, J. R., Huey, O. S., Houben, E. N., Pieters, J., Day, C., Oehlmann, W., Singh, M., Smith, K. G., and Lehner, P. J. (2006) Dendritic cell stimulation by mycobacterial Hsp70 is mediated through CCR5. *Science* 314, 454-458
- Qamra, R., Mande, S. C., Coates, A. R., and Henderson, B. (2005) The unusual chaperonins of *Mycobacterium tuberculosis*. *Tuberculosis* 85, 385-394
- Mattow, J., Schaible, U. E., Schmidt, F., Hagens, K., Siejak, F., Brestrich, G., Haeselbarth, G., Muller, E. C., Jungblut, P. R., and Kaufmann, S. H. (2003) Comparative proteome analysis of culture supernatant proteins from virulent *Mycobacterium tuberculosis* H37Rv and attenuated *M. bovis* BCG Copenhagen. *Electrophoresis* 24, 3405-3420
- Geluk, A., Lin, M. Y., van Meijgaarden, K. E., Leyten, E. M., Franken, K. L., Ottenhoff, T. H., and Klein, M. R. (2007) T-cell recognition of the HspX protein of *Mycobacterium tuberculosis* correlates with latent *M. tuberculosis* infection but not with *M. bovis* BCG vaccination. *Infect. Immun.* 75, 2914-2921
- Mehaffy, C., Hess, A., Prenni, J. E., Mathema, B., Kreiswirth, B., and Dobos, K. M. (2010) Descriptive proteomic analysis shows protein variability between closely related clinical isolates of *Mycobacterium tuberculosis*. *Proteomics* 10, 1966-1984
- Li, Y., Zeng, J., Shi, J., Wang, M., Rao, M., Xue, C., Du, Y., and He, Z. G. (2010) A proteome-scale identification of novel antigenic proteins in *Mycobacterium tuberculosis* toward diagnostic and vaccine development. *J. Proteome Res.* 9, 4812-4822

11. Singh, K. K., Dong, Y., Belisle, J. T., Harder, J., Arora, V. K., and Laal, S. (2005) Antigens of *Mycobacterium tuberculosis* recognized by antibodies during incipient, subclinical tuberculosis. *Clin. Diagn. Lab. Immunol* 12, 354-358
12. Bahk, Y. Y., Kim, S. A., Kim, J. S., Euh, H. J., Bai, G. H., Cho, S. N., and Kim, Y. S. (2004) Antigens secreted from *Mycobacterium tuberculosis*: identification by proteomics approach and test for diagnostic marker. *Proteomics* 4, 3299-3307
13. Banerjee, S., Nandyala, A., Podili, R., Katoch, V. M., Murthy, K. J., and Hasnain, S. E. (2004) *Mycobacterium tuberculosis* (Mtb) isocitrate dehydrogenases show strong B cell response and distinguish vaccinated controls from TB patients. *Proc. Natl. Acad. Sci. U.S.A* 101, 12652-12657
14. Singh, K. K., Zhang, X., Patibandla, A. S., Chien, P., Jr., and Laal, S. (2001) Antigens of *Mycobacterium tuberculosis* expressed during preclinical tuberculosis: serological immunodominance of proteins with repetitive amino acid sequences. *Infect. Immun.* 69, 4185-4191
15. Weldingh, K., Rosenkrands, I., Okkels, L. M., Doherty, T. M., and Andersen, P. (2005) Assessing the serodiagnostic potential of 35 *Mycobacterium tuberculosis* proteins and identification of four novel serological antigens. *J. Clin. Microbiol.* 43, 57-65
16. Lim, J. H., Kim, H. J., Lee, K. S., Jo, E. K., Song, C. H., Jung, S. B., Kim, S. Y., Lee, J. S., Paik, T. H., and Park, J. K. (2004) Identification of the new T-cell-stimulating antigens from *Mycobacterium tuberculosis* culture filtrate. *FEMS Microbiol. Lett.* 232, 51-59
17. Weldingh, K., Hansen, A., Jacobsen, S., and Andersen, P. (2000) High resolution electroelution of polyacrylamide gels for the purification of single proteins from *Mycobacterium tuberculosis* culture filtrate. *Scand. J. Immunol* 51, 79-86
18. Hermans, P. W., Abebe, F., Kuteyi, V. I., Kolk, A. H., Thole, J. E., and Harboe, M. (1995) Molecular and immunological characterization of the highly conserved antigen 84 from *Mycobacterium tuberculosis* and *Mycobacterium leprae*. *Infect. Immun.* 63, 954-960
